# Supplementary material for: Identification of key genes associated with progression and prognosis for lung squamous cell carcinoma
Source: PeerJ. 2020 May 6;8:e9086. doi: 10.7717/peerj.9086 (PMC7210810; doi:10.7717/peerj.9086)
Supplement: Supplemental Information 1 [file peerj-08-9086-s001.xlsx]

## Sheet: Sheet1
	Normal	Normal	Normal	Normal	Normal	LUSC	Normal	Normal	Normal	LUSC	Normal	Normal	Normal	LUSC	Normal	Normal	Normal	Normal	Normal	Normal	Normal	Normal	Normal	LUSC	Normal	Normal	Normal	Normal	Normal	Normal	Normal	Normal	LUSC	Normal	Normal	Normal	LUSC	Normal	Normal	Normal	Normal	LUSC	Normal	LUSC	LUSC	Normal	LUSC	Normal	LUSC
Gene name	GSM475657	GSM475658	GSM475659	GSM475660	GSM475663	GSM475664	GSM475665	GSM475666	GSM475667	GSM475668	GSM475669	GSM475671	GSM475673	GSM475674	GSM475675	GSM475678	GSM475680	GSM475682	GSM475684	GSM475686	GSM475688	GSM475690	GSM475693	GSM475694	GSM475695	GSM475697	GSM475699	GSM475702	GSM475704	GSM475705	GSM475707	GSM475711	GSM475713	GSM475714	GSM475716	GSM475718	GSM475719	GSM475721	GSM475723	GSM475725	GSM475726	GSM475728	GSM475729	GSM475730	GSM475731	GSM475732	GSM475733	GSM475734	GSM475735
T	0.257383	-0.249596	-0.433536	-0.122384	-0.340564	0.0732104	0.125577	0.367243	-0.330353	-0.18292	0.443839	-0.364208	-0.349338	-0.0690492	-0.239522	0.147689	-0.0753036	-0.511263	0.0391358	-0.0430488	0.621538	-0.309502	-0.125123	-0.200537	-0.817528	0.0982931	-0.338261	-0.339118	0.360692	0.10862	0.258703	-0.128205	-0.223942	0.0208665	-0.148296	-0.0403025	0.0285179	-0.116726	-0.33872	0.0193854	-0.377189	0.51692	0.0403778	-0.1003	-0.20278	-0.257169	-0.19859	-0.197798	-0.0735274
OSCP1	1.45827	0.370768	0.729688	0.925096	1.12524	-1.05089	-0.285225	-1.08025	3.006	-1.10866	-0.25973	0.617446	0.656931	-0.747209	0.0789227	1.25249	0.763657	0.635301	-0.107346	0.891541	0.865426	0.18648	0.171088	-2.49323	0.285829	0.290246	0.0446219	0.990366	-1.20612	0.828238	0.12411	0.119407	0.236538	0.377314	0.999262	2.17874	-1.2629	0.812261	0.737578	0.447204	0.578151	-1.29285	0.740703	-0.709755	-0.579249	0.554417	-1.58565	0.66105	-1.12952
ITGB6 /// LOC100505984	0.43672	0.483163	0.134225	-0.533465	0.283907	-0.864062	1.52461	-0.223103	0.135089	0.21395	1.41982	1.29123	0.536391	-1.86742	0.0881008	-0.149126	0.46571	0.0669381	1.11425	-0.5617	-0.0636513	1.406	0.610078	-1.66027	-0.208109	0.807984	0.877931	0.755826	0.404051	-0.116111	0.780346	0.633835	2.64832	0.943111	0.147377	-0.435121	-1.12151	-0.187494	-0.525447	-0.165594	0.413866	-0.802252	1.21831	-0.138572	-0.814549	0.263472	-1.69144	1.02876	-1.65932
AR	0.714945	0.215501	0.638711	0.209995	0.242377	0.629962	0.359504	-0.159039	0.480048	-0.265294	-0.163644	0.0592174	-0.159191	-0.393372	0.363739	0.625449	0.288829	0.718227	0.101914	0.913414	1.08345	0.275287	0.667095	-0.909355	0.568544	0.41966	0.617082	0.132473	-0.00903994	0.662017	0.222131	-0.285571	-0.68462	0.292823	0.558047	0.602948	-0.602172	1.08778	0.297739	0.967384	0.797617	-0.568616	0.239278	-0.803256	-0.514492	0.87518	-0.672666	0.506169	-0.652023
C2	0.0948239	1.02019	0.508739	0.678499	1.23712	-0.424698	0.144572	-0.0188146	0.57878	-0.807007	0.892447	0.925345	0.631864	-1.33871	1.1139	0.0272356	0.633299	0.362012	0.230662	1.05039	0.325796	1.02044	0.586554	0.239698	0.507476	0.548399	0.907814	1.19854	-0.850049	0.58198	0.808791	1.3157	0.308588	0.88915	0.280705	0.176263	-0.593476	0.251742	0.93619	0.0175807	0.948683	-1.64389	0.113506	-2.16593	-0.319726	0.530776	-1.29374	0.909034	0.0757256
C3	0.594461	0.68344	0.925199	0.833337	1.18795	0.0512294	0.729171	1.44805	0.763593	-0.888644	0.994471	1.0967	0.82945	-1.23362	1.26974	0.819814	1.33073	0.584525	0.981663	0.954194	1.10759	0.833062	0.570702	0.0260846	0.970638	0.419013	0.943093	1.02157	-1.57717	1.19282	0.821142	0.835974	0.905266	0.556932	0.727333	0.599123	-0.0542804	0.802956	1.42976	-0.0481881	0.809273	-2.54477	0.198378	-2.40583	0.492366	1.27613	-1.34777	0.851621	-0.902086
C5	0.498183	1.56452	0.487941	1.61494	1.94251	-0.34884	0.98504	1.47899	0.244181	-0.780608	1.14848	1.68675	1.05332	-1.24172	0.639866	1.31689	0.118886	0.512482	0.977357	0.703422	1.0211	0.0374118	1.16615	-1.61343	0.970764	0.567563	1.24107	0.218035	-0.993374	-0.117196	0.43038	1.12826	-0.789544	0.625361	0.99083	-0.0493911	-2.01131	0.0332285	0.493106	0.127044	1.42619	-2.62026	0.670275	-1.68916	-0.190667	0.369309	-0.500334	0.879373	-1.72867
C6	2.93801	-0.295227	0.754988	0.78926	1.64502	-1.38648	-0.390646	-0.00863162	4.47058	-0.755851	-0.991959	1.0196	2.36214	-0.991033	0.356332	3.21324	1.85832	0.549119	-0.065535	0.40796	2.34418	-0.449529	-0.766887	-0.391645	1.56894	-1.04997	-0.725198	2.31131	-0.897826	1.33795	-0.87672	0.779178	-0.219767	0.814472	1.42878	1.91272	-1.04847	0.534718	2.19192	0.902795	0.704801	-0.78988	0.554772	-0.785199	-0.0189491	-0.144754	-0.712943	0.810821	-1.51488
C7	-0.186829	1.1809	0.641817	0.712889	2.15678	-0.769068	1.03922	1.49693	0.905117	-0.508435	0.75251	0.752007	0.383982	-2.19308	1.23444	1.32095	1.91678	0.481986	0.67654	1.23218	2.36784	1.12658	1.13382	1.27652	1.11708	0.779738	2.40585	1.3978	0.395918	0.954831	0.628696	0.244404	-0.0833303	1.30472	0.25333	0.0747366	-1.43101	1.8111	2.22396	0.0330662	0.335519	-0.999998	-0.636137	-2.48373	0.165359	1.35903	-1.13532	0.729691	-1.78037
C9	-0.0432126	-0.0236938	0.045897	-0.125783	-0.112501	-0.0707637	-0.0281576	-0.0242964	-0.0786077	-0.104478	0.0574664	-0.0922376	0.0196314	0.206882	-0.0694876	-0.0602367	0.0177677	-0.0538387	-0.163947	-0.0500215	0.037883	-0.240221	0.0537124	-0.058236	0.233297	0.106144	-0.158602	-0.24469	-0.163851	-0.0105256	-0.0218639	0.133909	-0.108927	0.285859	0.274701	0.00209849	0.248665	-0.0380863	-5.41e-05	-0.0762944	-0.0835041	0.248076	-0.0806447	-0.291527	0.456476	-0.104188	-0.0986411	-0.04621	0.234376
CP	0.40531	-1.01929	-0.985955	0.410516	-0.503359	0.815358	-3.1041	0.0988774	2.12925	-1.20843	-1.53961	0.172366	-0.430646	-1.37133	-1.15975	0.102124	1.32336	-0.740646	-0.258556	-1.75906	0.148818	-0.155654	-2.61226	-1.60463	-0.215207	-2.84752	-1.14709	-0.56811	-3.51617	0.226298	-1.69735	1.14869	1.21414	-1.6559	0.34942	0.378693	1.14123	-0.290856	-0.175134	-0.62594	-0.88044	1.51743	-0.793215	-0.191352	0.817687	-1.79012	-2.00372	-0.712776	-1.54518
CS	-0.394354	-0.281149	-0.167379	-0.100258	-0.300136	-0.0572509	-0.324621	-0.197737	-0.366407	-0.0139099	-0.0940284	-0.225523	-0.423934	0.425047	0.198285	-0.391282	0.111058	-0.0822215	-0.0519528	0.105528	-0.228156	0.0167701	-0.167052	0.215651	0.0328507	-0.150829	-0.202805	-0.397409	-0.752566	0.118547	-0.133621	0.234302	-0.0139099	0.050189	-0.320966	-0.355147	-0.0849466	-0.230033	-0.241146	0.114084	-0.0962523	0.149549	-0.684931	-0.187102	-0.951155	-0.533926	0.767222	-0.14195	0.247656
F2	-0.316581	0.401341	-0.519685	-0.233166	-0.371754	-0.0637236	0.080128	-0.0658347	-0.388959	-0.126254	-0.304344	-0.235988	-0.42109	-0.0753116	0.0629839	-0.383292	-0.149976	0.21667	-0.619513	-0.274734	-0.200377	-0.346372	-0.308107	0.161313	-0.177821	-0.221342	-0.403535	-0.364106	0.32207	-0.00583318	-0.367367	-0.184007	-0.0885238	-0.0783767	0.193922	-0.134122	-0.334622	-0.27357	-0.445281	0.492244	-0.4921	0.169759	0.0278966	-0.0574428	0.15675	-0.67928	0.874155	-0.516774	0.691359
F3	0.578092	0.563032	0.189721	0.461542	0.680869	-1.60944	0.600189	-1.23343	-0.0978999	0.780089	0.631132	1.55929	0.580411	-1.52883	0.562683	1.20968	0.155701	0.441513	0.0425929	0.257428	0.625313	1.65387	1.12861	-0.00129491	0.407255	0.22563	0.352587	0.553922	0.966237	-0.122961	1.16746	0.794991	0.808775	0.216566	1.25069	0.86267	-1.62871	0.117436	0.436146	0.472524	0.160325	-2.69149	1.02745	0.266831	-0.641159	0.374989	-0.337008	0.969727	0.304966
F5	-0.98876	-0.272281	-1.05714	-0.960522	-1.23171	-0.526267	-0.412001	-0.221402	-0.739464	0.116988	-0.344992	0.565778	-0.641578	-0.964533	-0.0979943	0.19151	0.838607	-0.467925	-0.540903	-0.95131	-0.0174489	-0.665448	-0.189633	-0.0456976	-0.670972	-0.389646	0.410299	-0.355578	0.434707	-0.433076	-0.326752	-1.40973	1.06158	-0.478466	0.22157	-0.198794	1.31143	-0.843709	0.59907	-0.348264	-0.799295	-1.29228	-1.37884	-1.01822	0.898715	-0.345682	-0.838978	-1.28752	-0.35579
F7	-0.178836	-0.400421	-0.153146	-0.124515	-0.450346	0.126635	-0.159908	0.434486	-0.668437	-0.219012	-0.372047	-0.150248	-0.464693	-0.25748	-0.370903	-0.162961	-0.151877	0.0576959	-0.0583941	-0.0332608	-0.0638019	-0.057003	-0.017111	0.163087	-0.531522	0.0422852	-0.381847	-0.367426	0.651856	0.0310262	-0.06954	-0.204394	-0.126146	0.0392922	-0.0653707	-0.0316573	0.0814764	-0.0395326	-0.199451	-0.0729023	-0.194676	0.192482	0.175505	-0.195594	0.189736	0.172931	0.148536	-0.070886	-0.0550462
F8	0.594718	2.36633	0.477098	1.91133	0.957994	-1.11523	0.0102641	-0.608215	1.20081	-0.567982	0.219349	1.09394	0.572931	-0.622963	1.79426	0.0504208	2.46149	1.11062	1.21725	1.0272	1.12169	2.09769	2.35862	-1.06782	0.436599	0.0294413	1.6141	1.36457	-0.0160799	1.47262	0.352657	0.464465	-0.654596	0.193145	0.528879	0.194898	-1.76179	1.77217	1.95226	0.83587	0.679982	-1.82759	-0.0124143	-1.12229	-0.151921	1.43913	-0.904467	2.03342	-1.44563
F9	-0.119896	-0.252743	-0.122454	0.155036	-0.0257045	0.0669632	0.0776673	0.133538	0.179062	-0.0557592	0.0895114	0.0831655	0.127677	-0.31845	0.0331699	-0.0766988	0.128264	0.226785	-0.110914	-0.0330802	-0.0221747	-0.120149	0.0512066	-0.0174149	-0.102423	0.112374	0.0161829	0.0872779	-0.0510131	0.0631746	-0.05595	0.109232	-0.0174149	-0.191903	0.143277	-0.0903856	-0.192252	-0.0239976	-0.0812991	0.0669199	0.0458146	0.106805	-0.0879635	-0.17778	-0.182151	0.26156	0.376904	-0.115972	-0.00936252
FH	-0.446689	-0.218812	-0.0198352	-0.441566	-0.132239	0.414552	0.0185898	-0.34655	-0.264201	0.167534	-0.109181	-0.220239	-0.184872	0.394415	-0.0730626	-0.203126	-0.430391	-0.1598	-0.175957	-0.31329	-0.567192	-0.281624	-0.323717	-0.0400462	-0.0331482	-0.22539	-0.0902803	-0.25897	-1.10837	-0.363216	-0.32553	-0.182573	-0.0401794	-0.259307	-0.102016	-0.346472	0.19457	-0.0658844	0.0241456	-0.674028	-0.380864	0.441185	-0.0579097	0.118453	0.378341	-0.246692	0.860691	-0.212798	0.212504
GC	-0.229758	-0.295886	-0.253855	0.0205074	-0.232096	-0.373062	-0.03903	0.127616	-0.141231	-0.0692295	-0.0913521	-0.289483	0.189945	-0.13396	-0.0758666	-0.0680721	-0.193932	-0.171182	-0.0284222	-0.0606616	-0.250746	-0.250748	-0.0142731	-0.150952	-0.0464861	-0.327911	-0.0455152	-0.058476	-0.262206	-0.263572	-0.233677	-0.0596113	-0.193522	-0.135131	0.00940356	-0.00812239	-0.0791131	-0.11012	0.0373868	0.0960578	-0.109674	-0.105545	-0.0552183	-0.223937	0.132715	-0.000484	-0.0886457	-0.0538958	0.276071
GK	-0.00972662	-0.0404207	-0.0428923	0.202423	0.451801	-0.940258	1.05034	-0.486005	0.575299	-0.63576	0.766743	1.49613	0.284976	-0.586279	0.89212	-0.308103	1.18988	0.45711	0.697281	-0.429337	-0.175289	0.652584	0.0335124	0.412811	0.686585	0.23607	0.0562893	0.564419	0.57622	-0.182154	0.633813	0.256171	0.839043	0.350884	0.914587	0.0533379	-0.199816	-0.3314	-0.0388915	-0.574159	-0.250365	-1.28995	0.149212	-0.738067	-0.398841	0.109854	-0.115959	0.128072	0.139112
HP	0.806633	0.728198	1.221	1.01967	1.42336	0.982496	1.24018	3.61207	-0.472607	-0.271956	-0.4849	0.70016	0.21846	-3.25684	1.6779	0.193546	1.58708	1.31437	0.513755	1.24679	1.92759	1.1471	0.390656	-0.349015	2.94442	-0.268128	-2.57993	-2.13518	0.04777	2.05767	1.65302	1.36652	1.10698	0.992896	3.00897	-0.0537231	-3.50612	1.44073	2.98732	-1.47355	-0.0864099	-3.04659	1.76561	-3.06757	0.69493	-0.722945	-2.36454	0.647258	-3.37669
HR	-0.364148	-0.291822	-0.23696	0.0697573	-0.291381	0.285994	0.111631	0.295852	-0.368029	0.380096	-0.256234	-0.0879405	-0.423599	-0.0142674	-0.11362	0.172275	-0.035444	-0.144494	-0.570028	-0.0720202	-0.208501	-0.0876646	-0.472138	0.161572	-0.334188	-0.121541	-0.3392	-0.143389	0.216169	-0.437816	-0.208824	-0.272035	0.204975	0.151486	-0.27954	-0.196801	0.0757736	-0.0877941	0.0119663	0.183054	-0.336355	0.718745	-0.131417	-0.311296	-0.0254995	-0.109161	0.374141	-0.411716	0.763065
IK	0.225	0.488365	0.377852	0.293657	0.564611	-0.182291	0.190084	-0.393662	1.31101	-0.479587	-0.133124	0.158339	0.370218	-0.193314	0.445955	0.52987	0.273256	0.210722	0.0965668	0.214397	-0.235913	-0.0614671	-0.00368947	-0.168795	0.468604	0.0284032	0.504027	0.53656	-0.203515	0.0456009	-0.226258	-0.159029	0.503199	0.199422	0.125967	0.947941	-0.595668	0.437469	0.534579	0.421655	0.102694	-0.100415	0.0323114	-0.486427	-0.71121	-0.139437	-0.586142	0.418868	-0.698739
KL	2.09816	1.84951	1.91951	1.14336	1.16428	-1.30844	1.15514	-0.714544	1.00494	-1.26949	1.60648	0.758875	1.32201	-1.24989	0.598911	1.3483	0.431191	1.07805	-0.0068002	1.84339	0.811444	0.813656	1.38316	-1.07754	1.44475	0.559098	0.743765	1.88483	2.37852	0.644928	0.440273	0.655265	-0.967174	1.29017	0.562924	0.40049	-1.16597	1.66568	1.23896	1.94653	2.24128	-1.019	1.87174	-1.0271	-0.58377	0.636303	-1.13815	1.46499	-1.33818
KY	-0.194612	-0.223773	-0.202078	0.014452	-0.147998	-0.00431296	0.177387	0.153982	-0.282036	0.101568	-0.0312118	-0.198016	-0.146374	-0.117932	-0.0223976	0.0708689	-0.124333	-0.0739044	-0.197652	-0.0712079	0.0737859	0.0177228	-0.266933	-0.240844	-0.177016	-0.249707	-0.237123	-0.179214	0.0984596	0.0216411	-0.0340138	-0.0612531	-0.188547	0.0242038	-0.299809	0.0959007	-0.00981051	0.00734073	-0.17758	0.350051	-0.208867	0.351958	-0.0935009	0.076677	0.00730731	-0.174767	0.119502	-0.0642901	0.207691
MB	0.187852	-1.26081	-1.06931	0.534898	-0.306727	2.16489	-0.949815	-0.291006	1.11705	0.971536	-0.886838	-0.707119	-0.839531	-1.08052	-1.36203	-0.762961	-0.465081	-0.565344	-0.849648	-0.983812	-0.281878	-1.37935	-1.10232	-0.929907	-0.755321	-0.910893	-0.964572	-0.805125	-0.527299	-0.805552	-1.05499	-1.07738	0.490461	-1.1381	-0.919214	1.79937	-0.696255	0.919168	-1.09967	-0.182011	-0.967816	0.241029	-1.06074	-0.833522	-0.61259	-1.04964	-0.27911	-0.732366	-0.249661
PC	-0.608838	-0.852393	-0.729615	-0.253067	-0.384771	-0.213721	-0.755298	-0.416103	-0.373967	0.0787279	0.12066	-0.292377	-0.600471	0.584603	-0.055757	-0.739048	-0.386316	-0.619989	-0.599111	0.0388744	-1.15377	-0.474408	-0.631372	0.118529	-0.427645	-0.230051	0.0271195	-0.184796	-0.742286	-0.0913785	-0.107436	0.234946	-0.621876	-0.635253	-0.38128	-0.207303	-0.529895	-0.427395	-0.121443	-0.439096	-0.540614	-0.165989	-0.737567	0.306787	-0.701561	-0.139565	-0.0276291	-0.616495	2.39256
OSGEP	-0.381359	0.379861	0.0967366	-0.145478	0.0720037	-0.0207422	-0.184031	-0.411206	0.125716	-0.11869	0.0754748	0.0224281	0.212216	0.49013	0.161652	-0.152988	-0.260047	0.0282444	0.280718	0.10507	-1.00875	-0.21371	0.00876637	0.0121362	0.325294	0.177438	0.254793	0.0554344	-0.365505	-0.0294356	-0.1	-0.126075	0.380745	0.306436	-0.217431	-0.149968	-0.381884	0.0468791	0.156458	0.00876637	0.0502968	0.359744	-0.31855	-0.15985	-0.222177	0.146347	0.00876637	-0.130469	-0.308044
SI	0.0721077	0.0153783	-0.240714	0.0360002	-0.0194526	0.274839	-0.0863611	0.017328	-0.106328	-0.14334	0.0547925	0.0605951	-0.0329084	0.00195421	0.0553399	-0.115763	0.0505976	-0.0971729	0.116987	-0.0889812	0.08465	-0.174824	-0.0540849	-0.0348994	0.0145561	0.104782	-0.00696725	-0.182175	-0.0802318	0.0578711	-0.0695057	-0.0890435	-0.178184	-0.071259	0.0553399	0.0365616	0.259205	0.049978	0.00560068	0.0155769	0.287838	-0.082762	0.121064	-0.152745	-0.0576389	0.177806	0.225276	-0.0962597	-0.133299
TF	-0.140786	-0.526758	-0.468118	-0.0594715	-0.509027	-0.0567753	-0.296489	-0.536314	0.0353748	-0.556152	-0.660116	-0.575748	-0.644099	-0.337288	-0.141316	-0.282949	0.282432	-0.28234	-0.443768	-0.334885	-0.331037	-0.582764	-0.397269	-0.514941	-0.262537	-0.528682	-0.528425	-0.559603	-0.5395	-0.147461	-0.597287	-0.703701	-0.2293	-0.606371	-0.384475	-0.513227	-0.228052	0.650286	0.427918	-0.407163	-0.726605	-0.472943	-0.396484	0.708421	0.204397	-0.543294	-0.308505	-0.467986	0.0815418
TG	-0.365845	-0.0567929	-0.246065	-0.375059	-0.549821	0.0216161	-0.0468989	0.230358	0.0135585	1.14248	-0.173886	-0.434145	-0.165541	-0.0645434	-0.34934	0.130361	-0.144064	0.0730242	-0.508975	-0.138935	-0.35743	-0.237266	-0.191728	0.207454	0.0743959	-0.243603	-0.386675	-0.299021	0.213938	-0.196534	-0.221027	-0.129999	0.0841338	-0.00900204	-0.140558	-0.147402	0.451133	-0.00977315	-0.386977	0.682393	-0.0372377	0.20242	-0.464149	-0.118533	-0.0313998	-0.353133	0.659526	-0.369653	0.929004
TH	-0.613823	-0.460753	0.144821	-0.201113	-0.314761	-0.133444	0.00243137	0.162792	-0.583103	-0.0303474	-0.288143	-0.232326	0.165573	-0.00587534	-0.137952	-0.0674503	-0.192842	0.126391	-0.319407	0.0359582	-0.251579	-0.0354459	-0.0179316	0.160794	-0.166548	-0.493145	-0.132883	-0.530231	0.129532	-0.303461	-0.276248	0.240357	0.0433164	-0.0517271	-0.153635	-0.0219449	0.28309	-0.358292	-0.134552	0.181265	-0.324347	0.130387	-0.00587534	-0.0106674	-0.178245	-0.047553	-0.00295132	-0.0769341	0.0930375
XG	-0.0555926	-0.143098	-0.162145	-0.212052	-0.295775	-0.262766	0.23702	-0.208921	0.116857	0.446285	-0.170898	-0.345454	-0.274902	0.270196	-0.177741	0.197743	-0.374504	-0.168933	-0.0101003	-0.0984865	0.0239688	-0.379603	-0.0496391	-0.318157	-0.449521	0.0774704	0.0817159	-0.0406023	-0.212707	-0.127288	-0.1728	-0.280159	1.54397	-0.121534	-0.238915	0.31825	0.350553	0.594626	0.359951	-0.149409	0.0508363	0.651914	-0.186682	1.50943	-0.259285	-0.188127	-0.0577445	-0.0906329	-0.0435185
XK	-0.0392814	0.339627	0.0330988	-0.127401	0.82134	-1.05201	-0.465857	-1.05952	0.762685	-1.5743	-0.578521	-0.0156286	0.351116	1.21625	0.398539	0.214568	-0.430794	-0.58956	0.0680117	-0.0349351	-0.014512	-0.0390403	-0.11571	-0.72139	0.155026	-0.225762	0.421809	0.470683	-1.01235	-0.194396	-0.524818	0.258647	1.11645	-0.525363	0.484846	-0.460224	-1.15806	0.124185	0.490001	-0.900513	0.51733	1.36649	-0.41681	-0.0271603	-0.705888	0.185172	1.21907	0.473029	0.00583339
OSER1	-0.485479	0.314428	-0.0640477	-0.0211306	0.327509	0.310669	-0.0240258	-0.353178	0.297559	-0.057433	0.0407368	0.410567	-0.0935227	0.822648	-0.23988	-0.146815	0.293669	-0.00262492	0.143999	-0.276999	-0.222927	-0.125889	0.0751622	0.133001	0.258139	-0.180565	0.131081	0.495679	-0.0438354	-0.480186	-0.156567	-0.420136	0.275868	-0.122263	-0.0318168	-0.113235	-0.27289	-0.16949	0.313898	-0.587552	-0.278382	-0.67167	-0.547238	0.310274	-0.169897	-0.223196	0.322355	-0.00106409	0.143287
HIATL1	0.0929538	0.0994207	0.0531548	0.18122	0.253076	-0.0322346	0.0550744	-0.0509708	0.162419	0.600839	0.0659564	-0.0856674	0.272542	0.326085	0.0108139	-0.0602112	-0.0386106	0.0232737	0.0168684	0.0842407	0.153264	0.174166	-0.148383	0.0126131	0.0482007	0.0922731	0.213049	0.12943	-0.26975	-0.0496171	0.0262476	-0.041818	0.180488	0.165663	0.0447424	-0.126474	-0.0462794	-0.0839714	0.249372	-0.0843961	-0.0795144	0.458017	0.137607	0.498853	0.0492443	-0.0388347	-0.3479	0.0526726	-0.0380786
HIATL2	-0.466081	-0.330284	-0.728081	-0.122497	-0.31599	0.0591407	0.205208	0.361282	-0.0439041	0.846902	0.392563	0.0140624	-0.20292	0.666674	-0.413145	-0.565508	-0.217383	-0.772468	0.233868	-0.430899	0.0457021	-0.254947	-0.334543	-0.267169	-0.54488	0.0669718	-0.349526	-0.205375	-0.192728	-0.31869	-0.861446	-0.253013	0.322085	-0.000359	-0.374852	-0.302668	-0.0799224	-0.375157	-0.460936	-0.229406	-0.266174	0.338371	-0.35623	0.160609	-0.385681	-0.172675	0.03521	-0.465531	0.646764
GNPNAT1	-0.484413	-0.329185	-0.590044	-0.424251	-0.548638	0.579274	-0.171122	0.0934727	-0.87967	0.10291	-0.663299	-0.00595929	-0.392527	-0.00182994	-0.232482	-0.693815	0.428076	-0.445721	-0.725529	-0.239688	-0.579441	-0.211766	-0.402925	0.110529	-0.606604	-0.0693783	-0.220185	-0.425341	-1.21121	-0.540797	-0.236467	-0.510335	0.124812	-0.32302	-0.496438	-0.22809	0.245088	-0.588943	-0.129718	-1.02089	-0.320737	0.199483	-1.10394	-0.340205	0.425491	-0.381141	1.26243	-1.09132	-0.0400616
CYP2B6 /// CYP2B7P	2.5574	1.15013	2.21283	1.94403	1.83183	0.31184	1.74484	0.803558	1.8666	-1.99734	1.46827	2.95031	0.94026	-3.4382	1.63198	2.38103	1.18075	1.65383	1.40074	1.21257	1.66654	2.71139	2.54102	-3.36781	1.48516	1.00476	1.33064	2.51002	2.32339	2.00324	2.87003	3.15454	-1.81575	1.35823	2.80053	2.05687	-4.08569	1.74878	1.17266	1.00314	2.43589	-2.8027	2.09929	-2.8045	-0.719653	1.12016	-3.13828	1.92658	-3.57756
P4HTM	0.479368	-0.0945115	0.0423375	0.305511	0.265984	-1.03732	0.0423375	-0.301119	1.45242	-0.410667	0.0671427	0.106471	0.022882	-0.761831	-0.191458	0.584184	0.308878	-0.0322823	0.0423375	0.267975	0.170961	-0.143491	0.027855	-0.559198	-0.00627995	-0.133688	0.164412	0.495137	-0.462441	0.116126	0.123534	0.327811	-0.321655	0.12305	0.273471	0.895649	-1.67178	0.259103	-0.0207464	0.378311	0.123446	0.035602	-0.350999	-0.803816	-0.736552	0.182557	-2.2642	-0.219448	-0.397885
P4HA1	-0.263355	-0.0899349	-0.295718	-0.0651203	0.232022	0.0798569	0.331159	0.113908	0.0970802	0.235375	0.324663	-0.0558058	-0.130841	0.41904	-0.390827	-0.258885	0.436747	-0.0519637	-0.204867	-0.484394	-0.539746	-0.104076	-0.338187	-0.151186	-0.0654852	-0.583013	0.0197539	0.257601	-0.700882	-0.531263	-0.0648656	-0.309394	0.363174	-0.0918885	-0.203091	0.00377532	0.319953	-0.442088	-0.106638	-0.928948	-0.231689	0.13041	0.0665927	-0.0122545	0.0937024	-0.400986	0.162306	-0.418168	0.0813952
P4HA3	-0.355977	-0.310351	-0.350625	-0.152902	-0.370717	0.116735	0.117509	0.279419	-0.320243	0.724867	0.197846	-0.459611	-0.109731	0.233331	-0.0599582	-0.0797018	-0.183045	-0.24417	-0.337391	-0.504599	-0.285661	-0.418116	-0.38595	-0.0433861	-0.225033	-0.0325707	0.0565538	-0.43838	-0.121467	-0.1985	-0.520333	-0.532017	-0.013848	-0.324	-0.00921899	-0.282736	0.497084	-0.133336	-0.311295	-0.0490165	-0.293012	-0.297858	-0.452773	-0.289616	-0.00229109	-0.33254	0.427327	-0.38604	-0.120114
RP11-97C16.1	0.376999	0.140085	0.807365	-0.262131	0.599756	-0.176304	-0.0724676	-0.49152	0.543144	-0.528258	-0.0542964	0.355482	0.3879	0.162182	0.958834	0.78169	1.11193	-0.302182	0.458259	-0.208317	0.215829	-0.550948	0.363757	0.406706	0.374751	0.0792134	0.898197	0.25128	-0.48283	0.610959	0.612482	0.0579774	-0.421984	0.215679	0.399626	-0.0926353	-1.02836	1.05335	0.568286	-1.07189	0.0977658	0.635888	0.260062	0.306532	0.709747	0.140839	0.446814	0.353299	-1.10043
CLPTM1L	-0.606815	-0.119329	-0.152615	0.00414384	-0.303874	-0.129196	-0.082652	0.426959	-0.0915962	0.0123317	-0.129643	-0.101917	-0.0334435	-0.0425022	-0.22293	-0.534719	-0.290385	-0.0497941	-0.0565554	0.123727	-0.902837	-0.313024	-0.146179	0.221296	0.0607577	-0.188322	0.158978	-0.0904476	-0.825202	-0.051169	-0.228591	0.0834395	-0.455311	-0.240895	-0.184566	-0.32215	0.109191	-0.404339	-0.0561723	-0.271548	-0.505181	-0.486311	-0.462656	-0.214319	0.3752	-0.0660091	-0.0182071	-0.0584032	0.406601
MIR1244-3	-0.320978	0.0861579	-0.182568	-0.00209658	-0.0515685	-0.480696	-0.181266	0.150602	-0.2447	0.311924	-0.0506111	-0.213842	-0.110956	0.182008	-0.119088	-0.0167783	0.0392375	-0.256673	0.0751947	0.134072	-0.00146276	0.00937779	-0.253067	0.337541	-0.0658259	-0.00314562	-0.104804	-0.159069	0.351484	-0.227078	-0.317241	-0.136622	0.22219	-0.104842	-0.696166	-0.257269	0.40265	0.0996525	-0.0154215	0.175561	-0.503419	0.324269	-0.467136	-0.111082	-0.057634	-0.223465	-0.200192	-0.00478953	-0.252154
RP11-769O8.3	0.709633	0.844772	-0.589018	0.193589	0.465087	0.115803	0.126198	-0.940477	-0.697063	-0.648723	0.514185	0.393665	0.877049	0.11359	-0.785773	-0.682022	-0.242084	0.489818	0.11516	-0.271729	0.651039	0.295467	0.764062	-0.30715	0.508831	1.14077	-0.0634484	0.202478	1.41664	0.328529	0.259769	0.387037	0.408063	-0.976931	1.39682	0.224879	0.655466	-0.680114	0.370271	0.0164546	0.644114	0.992192	0.791203	1.26837	-0.412276	0.120364	1.54891	0.282392	-0.319332
POLRMT	-0.511869	-0.130127	-0.125455	-0.25318	-0.302882	0.476946	0.033941	0.172278	-0.278849	0.213841	-0.127591	-0.219886	-0.0392865	0.0340804	-0.0186178	-0.0662186	-0.204872	0.197358	0.0255357	0.0715222	-0.172232	-0.0576374	0.0790716	0.269204	-0.192938	0.14901	0.0664387	-0.207709	-0.317646	-0.282298	-0.0103343	0.00268465	-0.121578	0.0787988	0.194966	-0.242334	0.274153	-0.129897	-0.202237	-0.255409	-0.0497744	0.0479202	-0.323057	-0.327154	-0.332747	0.087494	0.442048	-0.31633	0.543073
BC010186	0.345015	0.706858	0.371848	0.167806	0.256641	0.143281	-0.24997	-0.373066	-0.282463	-0.174012	0.134609	-0.495963	0.192695	0.102436	0.45893	-0.120913	-0.360053	-0.126818	0.324317	0.840092	0.440105	-0.110125	0.0557028	-0.252701	0.584231	0.26461	1.04356	-0.236939	-0.945159	0.609745	0.141623	0.286756	-0.253445	-0.14992	0.112837	0.0892066	-0.764042	0.280994	0.640167	0.266654	0.111037	-0.582336	-0.0269376	-0.391388	-0.769297	0.12881	-0.806923	0.507541	-0.0955327
POLR1A	-0.157795	-0.463462	-0.557346	-0.249004	-0.489604	0.984516	-0.0920769	0.0365269	-0.240336	0.466276	-0.123029	-0.142248	-0.168547	-0.107015	-0.207911	-0.114532	-0.182389	-0.0970061	-0.061857	-0.125185	-0.17313	-0.123125	0.127729	0.0194687	-0.263001	-0.0779429	-0.243043	-0.110064	-0.487482	0.11484	-0.0266623	-0.0768919	0.183638	-0.213175	-0.275322	-0.373176	-0.299102	-0.473645	-0.497633	-0.187373	-0.583073	0.0702708	-0.413614	-0.113614	-0.137893	0.0632124	0.528107	-0.189458	0.207509
POLR1B	0.276845	-0.129207	-0.0606475	0.0129035	-0.0620301	0.21279	-0.370633	-0.0281854	-0.203062	0.0775012	-0.536943	-0.342374	0.087355	-0.441216	-0.107343	-0.0904335	0.298139	-0.190052	-0.24227	-0.165343	0.0918549	-0.326394	-0.367372	0.0606434	-0.527538	-0.351513	-0.159992	-0.327586	-0.42271	-0.100947	-0.0601372	-0.137894	-0.353588	-0.288516	-0.264295	-0.0470338	0.0189144	-0.23557	-0.200845	-0.104836	0.0813018	0.465931	-0.10546	0.877884	0.0770372	-0.374721	0.274092	-0.0301023	0.00958877
POLR1C	-0.512947	-0.167694	-0.00962077	-0.191434	-0.278677	0.582866	0.112959	-0.56025	-0.121084	-0.337074	-0.378302	0.396654	-0.235001	1.20455	0.0585308	-0.211632	0.83619	-0.176745	-0.464075	-0.569696	-0.200109	-0.484996	-0.613327	0.587521	-0.221661	-0.495423	-0.225462	-0.185991	-1.03823	-0.431726	-0.166219	-0.604127	-0.300438	-0.208944	0.0296853	-0.000948947	-0.0918945	-0.204219	-0.210555	-0.734298	-0.536225	0.259931	-0.427971	0.763771	-0.257363	-0.195496	0.804375	-0.395709	0.187219
POLR1D	-0.182759	0.0844757	0.244344	0.0825985	0.263564	0.116616	0.0105729	-0.439417	-0.0758683	0.159261	0.231259	-0.116745	0.0289772	0.4971	-0.0849924	-0.0555008	0.389543	0.0178144	0.0313733	-0.174283	0.00530211	0.0835834	-0.0169408	0.0529832	-0.202691	-0.411352	0.0610185	0.0943583	-0.594078	-0.2802	-0.29374	0.204337	-0.0262893	-0.0186244	-0.342389	-0.366537	0.0263117	0.00535189	0.177815	-0.678114	0.0163551	1.21304	-0.185921	0.0616808	-0.496875	0.00496951	0.725816	0.0673592	-0.322154
POLR1E	-0.147369	0.032745	0.0455934	-0.0774861	-0.0795933	0.591172	-0.17204	-0.189006	0.0195064	-0.258214	-0.0680189	0.125935	-0.0208473	0.450429	-0.0605916	-0.10283	0.210899	-0.114527	0.117949	-0.265635	-0.0294408	-0.137086	-0.0639789	0.00113888	0.142316	-0.0455954	-0.034244	-0.0921729	-0.190671	-0.329598	-0.221023	-0.378924	-0.0424081	-0.256124	0.410748	-0.193022	0.11254	-0.242131	0.245328	-0.228817	-0.0984995	-0.286728	-0.206519	-0.213577	-0.191294	-0.13233	0.0151158	-0.392246	-0.302877
POLR2A	0.039573	-0.0071302	0.0317409	0.0547554	-0.332362	0.304437	0.1349	-0.00755527	-0.308119	-0.091719	-0.244554	0.147051	0.0269284	0.0857444	0.165449	-0.187986	0.0779495	-0.100046	-0.0584845	-0.0118955	-0.0643477	-0.00597264	-0.0024582	0.0995966	-0.154524	-0.0273928	-0.0452985	-0.00279492	-0.076257	0.197205	0.0884356	-0.0363324	-0.0957579	-0.0988109	0.123368	-0.0599749	-0.0264818	-0.156386	-0.144743	0.0754139	-0.0572456	0.11034	-0.158217	0.00762102	-0.0882732	0.114271	-0.0242383	-0.0990898	0.332586
POLR2B	-0.0702757	0.0929257	0.083249	-0.281541	0.0361549	-0.28076	-0.147732	-0.146429	-0.026065	0.135256	-0.181642	-0.237853	-0.0553625	0.245013	0.0145556	-0.191855	-0.140155	0.00601609	-0.0386302	-0.201581	-0.0886557	-0.308831	-0.323708	0.36991	-0.150774	-0.130454	0.1631	0.0671405	-0.521989	-0.197771	-0.231366	-0.338285	0.0228141	-0.168837	-0.199733	-0.226432	-0.217128	-0.036541	0.251106	-0.304815	-0.182865	-0.679287	-0.264286	1.5828	0.103751	-0.237946	0.182899	0.0108276	-0.141298
POLR2C	0.115719	-0.034574	0.20448	0.061807	-0.129872	-0.120561	0.0727202	-0.0116514	-0.212947	-0.161218	-0.166969	0.354974	-0.0697997	-0.0473591	0.0261623	0.156421	0.126562	0.12946	0.176157	0.220139	0.385028	0.222886	0.0810071	-0.128458	-0.0278468	-0.0852688	-0.396775	-0.0448961	-0.205626	0.189327	-0.00551536	0.401281	-0.164462	0.1557	-0.0372734	-0.269528	-0.393576	0.176807	-0.235272	-0.000755	0.252924	-0.0528487	-0.0703809	-0.0921559	-0.123241	-0.112923	0.282604	-0.109167	-0.567759
POLR2D	-0.581518	-0.223515	-0.41071	-0.444554	-0.421662	0.436153	-0.565769	-0.557695	-0.711575	0.378848	-0.402436	-0.196982	-0.545797	1.24505	-0.0937293	-0.515636	0.097719	-0.321334	-0.397196	-0.0982593	-0.510176	-0.187411	-0.231526	0.460098	-0.235453	-0.306966	-0.364469	-0.474073	-1.13261	-0.452207	-0.16092	-0.529296	-0.0699913	-0.49485	-0.13813	-0.567799	-0.492884	-0.398483	-0.38668	-0.844384	-0.482883	0.158769	-0.653829	0.655351	0.115501	-0.3956	1.20147	-0.41551	0.488412
POLR2E	-0.326284	-0.364014	-0.667864	-0.268964	-0.837283	0.0755393	-0.0290184	-0.106665	-0.229991	0.183189	0.0195563	-0.186893	-0.732289	0.0309685	-0.850108	-1.02898	0.318006	-0.150258	0.0317696	0.247605	-0.660581	0.535548	0.207145	0.142524	-0.388764	0.459575	-1.28324	-0.772003	-0.531779	0.195786	0.0494232	0.224676	0.129851	0.0233368	-0.429677	0.0364807	0.735411	-0.635109	-0.992486	-0.509472	-0.199313	0.0370454	-1.41449	-1.08281	-1.65253	0.215215	0.528936	-0.183439	0.396348
POLR2F	-0.268205	-0.0233961	-0.154056	0.0782593	-0.27472	0.266406	-0.0634971	-0.0654129	-0.180493	-0.166842	-0.284982	-0.14556	-0.435398	0.14014	-0.112048	-0.0364802	0.041743	0.0576383	-0.311882	0.0871456	-0.332031	-0.243703	-0.083658	0.37855	0.214309	-0.243539	-0.393232	-0.168223	-0.483051	-0.0366873	-0.0670766	-0.237512	-0.250644	-0.11035	-0.312827	0.245941	0.465285	0.0264672	-0.279471	-0.28341	-0.139443	0.260435	-0.375826	-0.225546	-0.183278	-0.017602	1.09089	-0.153524	0.397517
POLR2G	-0.43335	-0.434532	-0.198224	-0.313292	-0.196497	0.0902783	-0.454257	0.0911992	-0.477782	0.243986	-0.0960419	-0.396481	-0.525637	0.370195	-0.517377	-0.0586657	-0.474486	-0.386705	-0.0104318	-0.149135	-0.518633	-0.912513	-0.234668	0.116962	-0.278921	0.0162119	-0.068276	-0.404859	-0.773549	-0.0849165	-0.431424	-0.591094	0.264132	-0.21621	-0.58544	-0.674203	0.150008	-0.120265	-0.357708	-0.683521	-0.21968	0.0112458	-0.750376	0.0238127	-0.447335	-0.344796	1.02399	-0.395914	0.563002
POLR2H	-1.01484	-0.635713	-0.582083	-0.776924	-0.679338	1.41077	-0.910588	-0.526357	-0.744416	-0.0752384	-0.835443	-0.628473	-0.808915	1.49876	-0.60921	-0.50088	-0.119121	-0.777546	-0.76842	-0.624884	-1.18526	-0.768343	-0.709038	0.955483	-0.601851	-0.590753	-0.476954	-0.913095	-0.959299	-0.243607	-0.548262	-0.439033	0.320274	-0.802571	-0.384869	-0.767542	0.0681345	-0.362099	-0.781313	-0.918129	-0.778273	1.80842	-0.87247	1.71035	1.24299	-0.629258	0.821252	-0.714938	0.944586
POLR2I	-0.230738	-0.161075	-0.227575	0.00309223	-0.526678	0.218437	-0.646484	-0.473046	0.305038	0.527738	-0.488044	-0.358862	-0.394481	1.0888	-0.467902	-0.0779793	-0.241058	-0.393	-0.516844	-0.0262723	-0.406341	-0.670523	-0.214578	0.642607	-0.104465	-0.0256952	-0.307767	-0.238003	-1.39753	0.0102234	-0.37189	-0.407733	0.114457	-0.28712	-0.58006	0.144553	-0.16388	-0.1179	-0.466897	-0.273873	-0.166317	1.09068	-1.0263	-0.047497	-0.398542	-0.233138	0.717485	-0.450963	0.656652
POLR2J	-0.658217	-0.187939	-0.965632	-0.292444	-0.683014	-0.110339	-0.221699	-0.0630178	-0.193549	0.407663	-0.00303105	-0.438739	-0.545593	0.192391	-0.703053	-0.437746	-0.0691782	0.0157273	-0.481066	-0.432659	-0.458166	-0.0854476	-0.342908	0.0612616	-0.458702	-0.304652	-0.724512	-0.520109	-0.652025	-0.275727	-0.391974	-0.0469094	0.458496	0.144412	-0.536341	-0.36284	0.559851	-0.297395	-0.8412	-0.852144	-0.614768	0.310095	-0.747871	0.0807521	-0.107619	-0.321669	1.54076	-0.395339	-0.0977923
C1orf186 /// LOC100505650 /// LOC101929219	-0.160326	-0.253104	-0.377771	-0.12623	-0.447528	0.521111	-0.153729	0.374469	-0.305824	-0.303728	-0.314969	-0.337023	-0.210342	-0.0735072	-0.383918	0.0575531	-0.242144	-0.197895	-0.15288	-0.384929	-0.0435551	-0.197562	-0.371674	0.588971	-0.233729	-0.519059	-0.436105	-0.276634	-0.0694131	-0.145573	0.00403998	-0.217086	2.42486	1.61957	2.32599	-0.338843	0.245515	-0.226164	-0.39647	0.0562147	-0.103438	1.82456	-0.250171	1.62072	0.145852	-0.0933464	0.058937	-0.425112	0.179912
POLR2K	-0.416889	-0.0568692	-0.183703	-0.341231	-0.114437	-0.370207	-0.0506548	-0.164449	-0.139466	0.659361	-0.265142	-0.261134	-0.231613	0.116709	-0.419574	-0.0845398	-0.205283	-0.341239	-0.450897	-0.632937	-0.505154	-0.0319651	-0.48215	0.0940355	-0.644882	-0.548594	-0.167517	-0.146427	-0.422361	-0.737945	-0.708608	-0.456449	0.229227	0.229818	-0.760265	-0.582809	0.372423	0.107034	-0.0354372	-0.417755	-0.36958	0.199514	0.041465	-0.0464958	-0.214664	-0.680156	0.227558	0.0744508	-0.58462
POLR2L	-0.0929216	0.18375	0.0338872	0.463073	-0.172229	-0.218195	-0.19163	0.365097	-0.205637	-0.261956	0.216013	0.678614	-0.154191	-0.810559	0.353902	0.218454	0.427269	0.171649	0.0162704	0.907402	-0.164887	0.0339864	0.608204	0.268373	0.0396413	0.470026	-0.00116359	0.0381948	-0.568746	0.567308	0.429077	0.485299	-0.463992	0.642183	0.0543127	-0.330071	-0.613675	0.276475	-0.0983992	0.119323	0.376952	0.404969	-0.684926	-1.44694	-1.14852	0.40773	0.604847	-0.0360586	-0.142012
POLR3A	-0.229986	-0.206118	-0.0351899	-0.328094	-0.0445264	-0.0722372	-0.541709	-0.327968	-0.256591	-0.0766282	-0.268341	-0.457025	0.0983406	-0.0714986	-0.00775573	-0.118446	-0.10893	0.0388531	-0.1101	-0.133204	-0.216449	-0.0481535	-0.117958	0.0135081	-0.282798	-0.312706	-0.159199	-0.157725	-0.432987	0.203454	0.159375	0.0632282	-0.233504	-0.102265	0.200454	-0.422915	-0.839293	-0.189291	-0.0955082	0.00573134	-0.102424	0.0154317	-0.156518	-0.280053	-0.064574	0.0347237	0.413878	-0.201526	0.944624
POLR3B	0.032416	-0.0412309	-0.0162353	-0.103908	0.0418007	0.0630894	0.0151522	-0.0820037	0.0694645	-0.391957	-0.0675407	0.0669628	0.192941	0.274126	-0.0729615	-0.171576	0.0846057	0.0369885	-0.00936658	0.0818787	0.0355839	-0.10948	-0.00770281	0.164669	0.160788	0.0464389	0.16453	-0.0189982	-0.0191966	0.256969	-0.0172406	-0.0340333	-0.0730401	0.000846	0.00358268	-0.0994604	0.163177	-0.0329887	0.03081	-0.224202	0.0164854	0.155706	0.105879	0.112259	0.0275857	-0.0127261	0.409792	-0.0189587	0.0979365
POLR3C	-0.533028	0.157584	-0.127325	0.00569907	0.0770462	0.235555	0.224404	-0.305251	-0.00166212	-0.389807	0.0983815	-0.146827	-0.120318	0.179852	-0.162957	-0.434221	0.124436	0.0137287	0.225774	0.0227934	-0.503755	-0.049652	0.3147	-0.0751272	0.0947925	0.160116	0.380552	0.233628	-1.00078	-0.196406	0.0765783	-0.219053	0.258388	-0.176883	-0.471695	-0.264294	0.469528	-0.343102	0.186029	-0.529809	-0.231969	-0.688561	-0.756812	0.0512985	-0.579329	-0.232312	0.112345	-0.312068	-0.25678
POLR3D	-0.88606	-0.562628	-0.547772	-0.310463	-0.441236	0.672966	0.158448	0.254653	-0.421988	0.196713	-0.137504	0.304261	-0.4973	-0.172397	-0.178677	-0.0563182	0.165017	-0.338155	-0.244607	-0.598338	-0.502153	-0.223023	0.0433049	0.71526	-0.475461	-1.11161	-0.107213	-0.268572	-0.157357	-0.475676	0.161878	-0.347463	0.161368	-0.249216	-0.0524848	-0.322888	-0.0959013	-0.403109	-0.651493	-1.03243	-0.454194	-0.801558	-0.523631	-0.617237	-0.862472	-0.387122	1.41153	-0.918305	0.131724
POLR3E	-0.0384651	-0.173516	-0.238787	-0.0267632	-0.030546	-0.000369	0.184582	0.312794	0.0153644	-0.134395	-0.0487214	-0.206798	-0.018121	-0.255597	-0.199327	-0.0998193	0.0777722	0.200818	0.10325	-0.103177	0.231073	0.0330646	-0.0180839	-0.210091	-0.530537	0.0830901	-0.0677741	-0.330694	0.127844	-0.192814	0.389703	-0.275867	0.179572	-0.00464461	0.190746	0.158478	-0.152098	-0.239877	-0.0874922	-0.0584289	0.306828	-0.0794743	0.00956386	-0.147773	0.014774	0.281428	0.126399	0.00540163	-0.167353
POLR3F	0.0638295	0.346957	0.302304	-0.259008	0.118594	-0.973165	-0.146421	-0.168665	0.188919	0.175233	-0.134504	-0.0205143	0.0981425	0.53327	-0.0413153	0.0290494	0.136083	-0.166003	-0.154608	0.0211558	0.0698951	-0.0614032	-0.220739	-0.495113	-0.206123	-0.122144	0.135656	0.101211	-0.606439	-0.283094	-0.0388159	-0.17805	-0.258564	0.145065	-0.250366	-0.43457	-0.474596	0.161531	0.25905	-0.161218	0.0123956	-0.756824	-0.0896098	0.0866386	-0.353465	-0.393729	0.142558	0.220159	-0.55326
HMGB1P4 /// HMGB1P4	-0.268617	0.0795826	-0.363112	-0.0568984	0.245146	-0.470565	0.316807	0.327676	0.1205	-0.0243567	0.360423	-0.206604	0.165311	0.402992	-0.436184	-0.491162	-0.508053	-0.034846	0.140386	-0.193435	-0.17416	0.103131	-0.289793	-0.0286895	-0.117377	-0.364868	-0.421259	0.173114	-0.299226	-0.702307	-0.42534	-0.0809428	0.26527	-0.172353	-1.08783	-0.246839	0.338571	-0.444025	0.0897898	-0.213529	-0.679202	0.0701145	-0.00322308	0.415244	0.367087	-0.419568	0.180921	-0.150837	0.1128
POLR3G	-0.236891	-0.0660512	-0.107849	-0.318161	0.145885	0.263414	0.0336096	0.0497273	-0.18452	-0.182183	-0.22949	-0.199344	-0.149599	-0.0627769	0.0627043	-0.109838	-0.105439	-0.013899	-0.10845	-0.131734	-0.113701	0.00797541	0.0518197	-0.0162911	-0.0153712	-0.0330365	0.0369898	-0.457282	0.0273644	-0.279411	0.0262985	-0.135876	-0.0577752	-0.0644555	-0.154973	0.00990503	-0.0241826	-0.179789	0.0587701	-0.269008	0.110708	0.256186	-0.0265792	-0.0795234	0.282477	0.0405232	0.351592	-0.00129209	-0.0284133
POLR3H	0.144261	-0.0636739	0.0114854	-0.00835687	-0.328898	-0.107241	0.0869946	-0.0637388	-0.52265	-0.10055	-0.0364285	0.0654848	-0.126562	-0.0800515	-0.0670762	-0.0308864	-0.339073	0.117591	-0.0930102	0.187412	-0.116153	0.525053	0.215493	0.278919	0.113865	0.0235503	-0.173891	0.186449	-0.209619	0.0583311	-0.00482839	0.538583	-0.532609	-0.0826065	0.443913	-0.287523	-0.285523	-0.0501648	-0.200358	-0.167931	0.0666259	0.058404	-0.324175	-0.296359	0.107185	0.0971833	0.380875	0.0564225	0.14515
POLR3K	-0.362687	-0.210899	-0.168637	-0.0467909	-0.195069	-0.116679	-0.227369	0.0499545	-0.0699685	-0.707917	-0.0889142	-0.33456	-0.0697965	0.339685	-0.092327	-0.109024	-0.440066	-0.0536072	0.00313612	-0.128942	-0.491934	-0.320829	-0.304807	0.104149	-0.170259	-0.0311196	-0.192907	-0.306831	-0.846169	-0.127894	-0.184971	-0.260461	0.142992	-0.0830627	-0.102762	-0.0571512	-0.097465	-0.257828	-0.154133	-0.784385	-0.325781	0.082601	-0.659181	-0.248267	-0.390201	-0.172028	1.27433	-0.401885	-0.0337249
RP9 /// RP9P	-0.404798	-0.00473642	0.0902085	-0.291294	0.0194767	0.0779363	-0.305115	-0.831775	-0.20747	0.0891084	-0.494129	-0.242119	0.141072	0.657631	0.291286	-0.277498	0.0412284	-0.171306	-0.380021	0.406844	-0.0261945	-0.608014	-0.281252	-0.126033	0.167599	-0.0228232	0.390511	-0.267186	-1.18267	0.0288148	-0.124533	-0.164607	-0.320155	-0.168473	0.0384687	-0.198839	0.698675	-0.0199291	0.296152	-0.157839	0.0753811	-0.263261	-0.552828	0.0234462	-0.103597	0.176273	1.61195	-0.12115	-0.426436
OSTF1	-0.22259	0.208108	0.109596	0.0749947	0.574806	1.36291	0.621751	0.441475	0.57179	-0.0933367	0.668643	0.246414	0.271912	1.61773	0.123048	-0.213378	-0.126437	0.354252	0.607617	-0.255826	-0.636449	0.0693757	0.384125	1.21555	0.368989	0.391965	0.29268	0.499699	-0.00483258	0.0960026	0.18982	-0.532025	0.570234	0.259862	0.399491	-0.0663674	0.459296	-0.220149	0.236554	-0.382895	-0.151479	-0.727065	-0.305547	0.530488	0.135851	0.119214	0.93863	-0.42628	1.46586
POM121	-0.0995808	0.155723	-0.337607	-0.134247	-0.628688	0.228626	0.485591	-0.0290395	-0.408398	-0.0248147	-0.867237	-0.242781	0.0981264	0.2228	-0.190416	-0.363032	0.102411	-0.19789	0.0690788	-0.273888	-0.128253	0.192006	0.780407	0.181349	-0.223154	0.30275	-0.297036	-0.150899	0.0648071	0.00123403	-0.00927421	-0.0232881	0.178744	0.185891	-0.289002	-0.322116	0.39508	-0.0644493	-0.00489131	-0.152365	0.266724	0.220316	-0.192221	0.239589	-0.184966	0.288682	0.66373	-0.24536	0.0574437
AX747140 /// TMEM198B	0.13031	-0.535669	-0.519549	0.118619	-0.328769	0.19297	0.0941093	0.455334	-0.145535	0.0328216	-0.133506	-0.297995	-0.360219	-0.0681395	0.0706839	-0.0420856	-0.102275	-0.155029	-0.248095	-0.0246619	0.132941	0.00259451	-0.0435348	0.0184554	-0.528914	-0.161036	-0.417649	-0.276503	0.270501	0.109764	0.0825293	-0.0205333	-0.202219	-0.0571691	0.205967	0.21101	-0.188108	-0.247849	-0.4778	0.115373	-0.0824723	0.330306	-0.0501182	-0.103706	0.0238513	0.112539	0.139429	-0.355742	0.665935
OSTM1	0.484672	0.429622	0.632713	-0.152635	0.617099	-0.616819	0.115567	-0.295295	0.538943	0.0732051	0.369305	0.528635	0.430952	0.10925	0.721631	0.1312	0.286098	0.562016	0.487004	0.206395	0.497952	0.643958	0.195357	0.0958633	0.444473	0.473083	0.8228	0.11206	-0.367427	0.0678631	0.625686	0.27394	0.0958273	0.348206	0.737487	-0.170761	0.157787	0.44844	0.830861	-0.341313	1.04772	-0.901589	0.779381	0.15229	-0.0689531	0.187716	-1.30308	0.740762	-0.737177
RP11-499E18.1	0.54352	0.678294	0.585972	0.628864	1.38223	-0.142739	-0.371144	-0.543561	0.917297	-0.452989	0.389787	0.335832	0.344494	-0.205013	0.752792	-0.0316168	0.122441	-0.551007	0.0408502	0.736045	0.335996	0.119706	0.223062	-0.027445	0.827813	-0.305361	1.29146	0.674414	0.0882643	0.467576	0.171554	0.780971	0.837278	0.223711	0.430989	-0.679014	-0.388513	0.318137	0.390146	-0.451308	0.321116	-0.592078	0.238101	-0.884633	-0.129299	0.185757	0.337493	0.574987	-0.777738
GPRASP1	0.172483	1.9575	1.34473	0.663697	1.13355	-0.74312	0.597825	-0.0817334	1.10704	-0.94176	0.060682	0.770508	1.17314	0.883178	0.483074	1.42218	1.18461	0.766932	0.698553	0.976523	1.2573	0.694573	0.982677	0.159368	1.03353	0.582348	1.25193	1.08553	0.0285348	0.517341	0.27565	0.345781	-0.2355	0.484669	0.673097	1.10424	-1.37146	1.81597	1.45764	0.218036	0.856962	-0.819977	-0.149582	-0.369241	-0.588892	1.21294	-1.45062	0.860725	-1.48506
AC087501.1	-0.0827379	-0.137067	-0.101926	0.00405764	-0.184786	0.155378	0.122496	0.0647656	-0.0987341	-0.0143999	-0.100235	0.046246	-0.0476549	0.0426889	-0.0700148	0.0219064	-0.225446	-0.0616513	0.166363	-0.0306025	-0.0442999	-0.198457	-0.121643	0.02046	0.0348766	0.0339157	-0.273212	-0.136124	0.135818	0.027343	0.124691	-0.207612	-0.125401	-0.0242632	0.115262	0.235247	0.185289	-0.269775	-0.129982	0.175254	-0.0567846	0.335695	-0.0142046	0.206456	0.0998998	0.0589524	0.431477	-0.229208	0.252779
RP4-710M16.1	-0.583111	-0.466192	-0.155443	0.241797	-0.259861	-0.467605	0.01245	0.721368	-0.237536	0.14113	-9.28e-05	-0.174442	-0.329534	0.0658944	-0.00782111	0.0924048	-0.102174	-0.224933	-0.274739	0.0662533	0.133739	-0.136278	-0.519153	-0.0182789	-0.310587	-0.971759	-0.380947	-0.392252	0.114671	-0.179755	-0.544981	-0.298096	-0.411806	-0.280469	-0.377945	-0.466459	0.0571157	0.311147	-0.341666	-0.31667	-0.231089	0.738312	-0.442938	-0.228432	-0.181879	-0.593211	0.466232	-0.0547832	-0.272857
H3F3A /// H3F3AP4 /// H3F3B	-0.0267113	0.106866	-0.0747924	0.0679664	-0.0424224	0.0791731	-0.0519034	-0.0871429	0.0447762	0.0525244	-0.0322777	-0.0197124	-0.14495	0.13026	0.070588	-0.0215314	-0.0723415	0.100665	-0.149378	-0.0950542	-0.0209727	-0.39967	-0.0770906	-0.189612	-0.09015	-0.0277238	-0.02935	-0.228819	-0.277775	-0.0194661	-0.101484	-0.161767	0.0219434	-0.0416866	-0.0387479	0.0433758	0.178632	-0.033922	-0.10069	-0.0930216	0.0821964	-0.316566	-0.193641	-0.217581	0.032608	-0.144069	0.342819	-0.195951	0.0589793
CCDC102A	-0.039202	0.418074	-0.00466467	0.154833	0.151096	0.484119	0.0972387	0.10623	0.388424	0.368088	0.000822	0.0329392	0.0652489	0.0418863	-0.11825	0.300944	-0.0434402	0.34368	0.142119	0.68425	-0.135955	0.0273264	0.524127	-0.154497	-0.119641	0.327939	0.231425	0.159218	-0.289417	0.702925	-0.0848238	0.151776	-0.346638	0.252803	-0.334802	-0.118628	-0.102027	0.30521	-0.119641	-0.0844585	0.287905	-0.0576296	-0.0446634	-0.581007	-0.275968	0.238001	0.583109	-0.151878	-0.077275
CCDC102B	0.540372	1.65493	1.1486	-0.108081	0.851448	-0.701137	1.56585	0.947772	0.303535	-0.200988	2.08088	0.683303	0.327309	-0.621178	0.315017	1.34536	0.578393	1.16783	0.696388	1.32631	0.420881	0.182605	1.69637	0.477565	1.00884	0.837891	1.70755	1.20014	0.771586	0.0888745	0.499838	-0.146159	0.119678	0.929024	0.19842	-0.348381	-1.36915	0.975214	1.3206	-0.137483	0.198231	-3.11751	0.636783	-1.25702	0.675891	1.15033	-1.21341	0.584008	-2.31037
CCDC109B	-0.36778	0.0880791	-0.0782191	-0.141717	0.108232	-0.442169	0.00346426	0.175807	0.0736442	0.217743	-0.327524	-0.0187323	0.160248	0.349067	0.585412	-0.0985714	-0.0592541	-0.379958	0.25516	0.050137	0.0911673	-0.285954	-0.333165	0.900586	-0.0322463	-0.709971	0.476455	0.112213	-0.6195	-0.431233	-0.252703	-1.19355	1.26915	-0.139705	-0.365758	-0.0696053	0.573704	-0.357834	0.56584	-0.691662	-0.11474	0.431241	-0.488282	0.515677	-0.140383	0.212761	-1.04295	-0.0448266	-0.316821
JARID2	-0.389881	-0.284668	0.104521	-0.341089	0.0107502	0.953068	-0.667127	-0.900383	-0.171074	0.741507	-0.210507	0.171187	0.182553	0.285637	0.371266	-0.127708	0.339662	-0.0582779	-0.40689	-0.158458	-0.453583	-0.115683	-0.36481	0.416913	-0.144705	-0.121999	0.0102496	-0.0768614	0.15883	-0.274193	0.0237971	0.0230329	0.130856	0.207816	0.252261	0.0360644	0.65935	-0.265337	0.178721	-0.110227	-0.0195875	0.706289	0.265698	0.894462	0.524652	-0.174832	1.03645	-0.0995001	0.292234
RP11-112J3.16	0.373151	-0.153491	0.351118	-0.315169	0.539275	-0.0538847	0.00360525	-0.242253	0.137883	-0.552175	-0.133262	0.0333931	0.28551	-0.0362628	0.592756	0.055498	0.0695766	-0.0480202	0.6391	0.0328586	0.0966362	-0.475102	-0.0823947	-0.0184278	-0.315556	-0.0995666	0.237094	-0.0811598	-0.435955	0.678983	0.324152	-0.193939	-0.536168	-0.172943	0.189074	0.101348	-0.269965	0.269148	-0.00151902	-0.246409	0.63732	-0.1062	-0.110094	-0.554839	0.3842	-0.280616	-0.271241	-0.0782574	-0.261778
ANKRD20A1 /// ANKRD20A12P /// ANKRD20A2 /// ANKRD20A3 /// ANKRD20A4 /// ANKRD20A5P /// ANKRD20A8P	0.863689	-0.0818554	0.768894	-0.107259	0.76601	-0.476702	0.0513512	-0.316523	0.459182	-0.589139	-0.152792	-0.166491	-0.044311	-0.220846	-0.0348726	-0.271913	-0.412289	0.134756	0.326421	0.0433519	0.867499	0.0442505	0.548425	-0.317631	-0.234333	-0.293973	0.139505	0.0412504	1.64375	0.705412	0.30698	-0.111844	-0.548276	-0.127949	-0.164122	0.441945	0.273155	0.115148	0.802217	1.77167	0.355632	-0.417029	0.966119	-0.0118941	0.0940931	0.0962193	0.111419	1.08658	-0.241084
RP11-680F8.4	0.790939	0.709955	-0.0987474	-0.0463556	0.350048	0.421598	-0.215036	-0.280721	-0.326334	-0.361126	0.751763	-0.241114	1.2931	-0.444035	-0.583248	-0.456348	-0.234196	0.411311	-0.120861	-0.0155537	0.627704	1.56418	0.947457	-0.666639	0.672508	1.51845	-0.19457	-0.292304	1.70873	-0.272176	0.705324	0.792268	-0.0536976	-0.38916	0.446385	-0.00673351	-0.338803	-0.26418	-0.0222427	0.557121	0.129922	0.40799	1.44578	1.20128	-0.0715696	1.05726	-0.0869696	0.666617	0.0994727
CEP57L1	-0.144884	0.0780717	0.0256668	0.0356217	0.173634	0.0129162	-0.111802	-0.00237453	0.00413954	-0.148559	-0.0743211	0.00408687	-0.0282731	0.0450393	-0.0244945	-0.031985	-0.0965956	-0.00120848	-0.0313214	0.00272815	-0.196761	-0.165753	-0.0255628	0.033683	-0.21703	-0.05783	0.209297	-0.109714	-0.166916	-0.0908924	-0.145398	-0.18691	-0.0281706	-0.0745479	-0.0878432	0.0386604	-0.108092	-0.00896487	-0.0327906	-0.171243	0.0228555	-0.023002	0.0104356	-0.0763018	-0.0322411	-0.192306	0.0819648	-0.10541	0.0450263
DQ573539 /// SNX18P3 /// SNX18P3	-0.0448649	-0.248497	0.125424	-0.107472	-0.250994	-0.0335403	-0.0247396	0.112608	-0.183854	-0.0206721	-0.265588	-0.14329	-0.058563	0.544112	0.0850623	0.0302746	-0.155214	-0.17197	-0.236131	-0.144062	0.0159853	-0.0250326	-0.343907	-0.036949	-0.270115	-0.218204	0.113143	-0.190159	0.083193	-0.109529	-0.239418	0.147398	-0.0127335	-0.0194803	0.336175	-0.0496663	0.49952	-0.00563418	-0.0819555	0.111567	-0.198805	0.21482	0.0652058	-0.234253	-0.036725	-0.353864	0.195602	-0.000537	0.194975
LINC00511 /// LINC00673	-0.303781	-1.36938	-0.908546	-0.381847	-0.82132	1.50139	-0.764345	-0.88269	0.0908559	0.889319	-1.00618	-0.554651	-0.703672	1.33307	-0.742255	-0.419387	-0.624682	-0.568366	-1.01651	-1.14183	-0.443254	-0.815513	-1.03719	0.439128	-0.68275	-1.06744	-0.263458	-0.670757	-0.606329	-0.76083	-0.940296	-0.770648	0.505213	-0.905266	-0.0904499	0.439151	1.068	-0.355985	-0.736453	-0.916753	-0.831327	2.6167	-0.486634	1.22723	0.197091	-1.01419	0.517925	-0.80676	0.551649
CTD-2196E14.6	-0.0466708	-0.158715	-0.210767	0.125353	-0.0840287	-0.0568379	-0.182313	-0.011313	-0.218627	0.173702	-0.0661755	-0.151186	0.0373547	0.272683	-0.115341	0.0632371	-0.19513	-0.21005	-0.0248595	-0.136081	-0.107789	-0.352237	-0.0298994	-0.0139449	-0.168443	-0.0362226	-0.0829316	-0.0630135	-0.103817	0.105365	0.0713336	0.0149262	-0.110235	-0.0425197	-0.234431	-0.0804425	-0.0437562	0.185641	-0.0629716	0.109065	-0.181528	0.321845	-0.0721605	0.183431	-0.104972	-0.146372	0.123892	-0.308321	0.192777
CEP83-AS1	-0.408125	0.0944151	0.193938	0.198144	-0.241118	0.120283	0.122351	0.192225	-0.0594672	0.0178129	0.0652339	-0.0387349	0.0741357	0.0334954	-0.00414756	-0.0975537	-0.0863851	0.279074	-0.184461	-0.110391	-0.0879398	-0.27907	-0.035188	-0.143486	-0.0307266	-0.206064	-0.132676	0.12678	0.166235	-0.151982	-0.278691	-0.00886461	-0.0578134	0.0348011	0.0235407	0.250383	-0.106948	0.0494247	-0.0902093	0.127129	0.022078	0.0711637	0.074516	0.0775042	0.167955	0.0468198	0.312203	-0.246754	0.366022
OTOGL	-0.104209	0.0088915	-0.00396947	0.31696	0.0103356	0.716586	0.101778	-0.15576	-0.00334471	-0.200007	-0.0656221	-0.104683	-0.212608	0.0771735	-0.143778	-0.0461506	-0.122079	0.26902	0.0488533	0.0215419	-0.0136065	-0.179118	0.0573594	-0.116381	0.235878	-0.0351892	-0.0590176	-0.018674	-0.308998	0.0201447	-0.157803	-0.114907	-0.0295594	-0.0212028	0.0161082	-0.28799	0.0840752	-0.142344	-0.0458182	0.281049	-0.166382	0.0182771	-0.112822	0.260315	-0.187873	-0.265421	-0.109838	-0.16394	0.0309171
FYTTD1	-0.284778	0.0637679	-0.159327	-0.675595	-0.183486	0.0473287	0.636155	-0.246791	-0.0708983	0.210515	0.0503207	0.0909153	0.026134	1.54738	-0.337003	-0.584648	0.221779	-0.0848303	0.309837	-0.819077	-0.112834	0.228055	-0.124379	0.369991	-0.333643	0.207835	-0.314518	0.0064559	0.276644	-0.615566	-0.363265	-0.359628	0.539543	0.106362	-0.416517	-0.583235	0.651435	-0.37774	-0.346077	-0.237406	-0.619478	0.519841	-0.0869429	0.887513	-0.37834	-0.143784	-0.68572	-0.230904	0.692261
OTOP2	-0.21189	-0.333198	-0.0411779	-0.0909715	-0.694493	0.20328	0.0402452	0.315219	-0.398148	-0.0658175	-0.362467	-0.119222	-0.105852	-0.141825	0.0720032	0.089511	0.0670251	0.210304	0.246394	0.0893687	-0.156867	0.25666	0.122172	-0.113039	-0.28382	-0.133764	-0.199292	-0.284079	0.0798836	-0.221693	-0.072317	0.0659757	-0.111603	0.326015	0.0309473	0.195718	0.26229	-0.313359	-0.307789	0.0527302	-0.0341506	0.469848	-0.141797	-0.282716	0.253845	-0.014537	0.364609	-0.240864	0.252792
CKMT1A /// CKMT1B	-0.975144	-1.56513	-0.72161	-0.779189	-1.25494	2.94343	-1.25165	-0.766582	-0.276537	2.45038	-1.56811	-1.53877	-1.36528	2.55312	-1.6174	-1.0192	-1.13922	-1.27207	-1.57019	-1.32685	-1.26371	-1.49267	-1.73976	1.40444	-1.55399	-1.54225	-0.917686	-1.18159	-1.22938	-0.762308	-1.75649	-0.956458	0.8514	-1.15606	-1.52555	-0.00320593	0.623664	-0.711812	-0.982638	-0.735272	-1.44224	3.91963	-0.891696	1.67462	-0.434312	-1.02228	1.71948	-1.37214	2.25625
MCM3AP-AS1	-0.10867	-0.0484367	-0.229252	-0.0577118	-0.0322117	0.413632	-0.401832	-0.057321	-0.0719764	-0.122136	-0.121631	-0.202347	-0.0707191	0.240699	-0.289164	-0.380847	-0.196404	-0.263783	-0.147051	-0.583726	-0.04804	-0.574852	-0.268209	0.317157	-0.058889	-0.488427	-0.0571035	-0.317407	-0.267062	-0.522629	-0.405098	-0.292087	-0.02182	-0.276163	-0.0452252	0.0364108	0.031509	-0.3763	0.0139923	-0.274668	-0.261998	1.32397	-0.134167	0.723314	0.906422	-0.16536	0.531699	-0.0205749	0.00644723
HAUS4 /// MIR4707	0.00803642	0.504574	0.432203	0.341356	0.736172	0.315214	0.116293	-0.00458691	0.0935406	-0.868718	0.383534	-0.0241461	-0.263517	0.843872	0.120407	-0.249723	-0.270513	0.0799798	0.598221	0.502525	-0.232796	-0.141903	0.25747	0.213482	0.128003	0.274742	0.391246	0.426887	-1.4952	0.191642	-0.225649	0.03982	0.887312	0.0761972	0.169906	-0.0578369	-0.470343	0.0307249	0.159951	-0.606182	0.442396	0.371969	-0.668919	-0.861853	-0.616578	-0.18722	0.115799	-0.0210268	-0.423862
UQCRFS1	-0.484552	-0.0959326	-0.155902	-0.240514	-0.416251	0.180786	0.103145	-0.0988651	-0.296865	-0.0937369	-0.0770536	-0.310356	-0.426796	1.73836	-0.0468568	-0.240314	0.146953	-0.195091	-0.210816	-0.0492576	-0.469875	-0.384895	-0.242595	0.92809	-0.0985355	-0.115234	-0.215025	-0.221225	-1.12775	-0.249799	-0.337884	-0.658758	0.141285	-0.0874311	-0.121377	-0.171047	0.156455	-0.267834	-0.228	-0.08902	-0.342514	0.822058	-0.743483	0.0105931	-1.17273	-0.283047	0.730725	-0.483677	0.346964
RBM12B-AS1	-0.434842	0.219182	-0.0356945	-0.117491	-0.204669	-0.1964	-0.0346056	0.122263	-0.193701	-0.191894	-0.176582	-0.0777379	0.127156	-0.258064	-0.0255532	0.0155403	-0.0941546	-0.145126	-0.320724	-0.157361	-0.0522612	-0.12836	0.0181012	-0.196843	0.268973	-0.0533842	-0.13482	-0.0977179	0.13767	-0.191112	-0.0695995	-0.306529	0.0479775	0.0580117	-0.0209717	-0.31901	-0.0104597	-0.164851	-0.192822	0.437936	-0.0169668	0.286597	-0.0483414	-0.202255	-0.0932533	-0.101774	0.27233	0.0271163	0.760655
G3BP1	0.123713	-0.0357611	-0.210805	-0.0831827	-0.19199	-0.109201	-0.178557	-0.0294108	-0.0794771	-0.0211722	-0.0428036	0.033079	0.0705557	-0.0836348	-0.315221	-0.447203	0.11399	-0.132855	0.0355957	-0.300688	0.215104	0.0654157	-0.151013	-0.0335883	-0.113353	0.192445	-0.489495	-0.142255	-0.0938633	-0.218503	0.0832395	0.187098	-0.0386818	-0.287087	-0.027676	-0.0462427	0.0485247	-0.4756	-0.15022	-0.194388	-0.448734	0.495818	0.0936219	0.764716	-0.0471985	-0.0327953	-0.0775511	-0.115477	0.250255
G3BP2	-0.167923	0.246689	-0.294793	-0.45548	0.114529	-0.678478	0.318163	0.0549469	-0.00492331	-0.108161	0.531396	0.21645	-0.0799192	0.213934	-0.156184	-0.74253	0.297276	-0.239573	0.41984	-0.260652	-0.398773	0.22716	-0.344109	0.690622	-0.166676	0.183904	-0.0954585	0.168957	-0.172989	-0.378448	0.101034	-0.177282	0.571963	-0.0509977	-0.0914317	-0.0950451	-0.299438	-0.499749	-0.13634	-0.151842	-0.0134785	-0.69522	-0.154361	-0.228844	-0.650377	-0.449668	-0.427971	0.0705477	-0.177567
OTUD4	0.0134025	0.0895124	-0.191772	0.0917608	0.0322385	-0.166469	-0.0517416	-0.14364	0.0780553	-0.177738	0.135666	0.54244	0.0195181	-0.176022	-0.143175	-0.229789	0.185425	0.100292	-0.101196	0.0963652	0.147311	0.535201	0.105587	0.0468469	0.0364058	-0.00440782	-0.186435	-0.159262	1.37137	-0.353151	0.276423	0.0935424	-0.0397074	-0.0357457	0.0357101	0.0995629	-0.115341	-0.135652	-0.191221	0.0668634	-0.0455921	0.212931	0.0399085	-0.0265533	-0.125427	0.0522476	-0.487414	0.0258381	-0.116322
OTUD5	-0.597012	-0.291967	-0.578919	-0.278835	-0.558475	0.0542933	0.0028327	0.354765	-0.109823	0.372182	-0.163054	-0.163505	-0.32502	-0.244413	-0.284073	-0.380376	0.109937	-0.011497	-0.107047	-0.0945472	-0.797192	0.147115	-0.185772	0.215928	-0.252301	-0.00843246	-0.571961	-0.321057	-0.217603	0.139735	-0.110174	0.24429	0.237943	-0.159119	-0.488955	-0.360443	0.261984	-0.265362	-0.591014	0.27166	-0.523731	0.0182274	-0.883966	-0.631168	-0.221299	-0.134557	0.12119	-0.459045	0.381841
OTUB2	-0.523256	-0.55995	-0.363031	-0.033021	-0.403654	0.200752	-0.0530782	0.242773	-0.302062	0.286233	0.0648288	-0.195218	-0.341455	-0.104678	-0.239171	-0.394887	-0.40251	-0.277753	-0.192344	-0.262088	-0.157004	-0.0230858	-0.390702	0.129412	-0.196301	-0.216163	-0.112137	-0.434767	0.09291	-0.086367	-0.145181	-0.198646	-0.235431	-0.378959	0.132206	-0.284082	-0.0324435	-0.101948	-0.38454	-0.0690905	-0.11995	0.0487813	-0.20922	-0.150023	0.0247675	-0.383555	0.200673	-0.0962964	-0.14822
OTUD1	0.734732	1.55268	0.840928	0.479909	1.48315	-0.81135	0.479515	-0.366638	1.17105	-0.587476	1.0129	1.11476	1.07419	-0.0084785	1.33345	0.874283	0.730106	1.57342	0.508153	0.626464	0.517933	0.985717	1.13233	-0.346019	1.35002	0.0990204	0.880212	0.993524	0.767658	0.0949491	1.24577	-0.187533	-0.226877	0.910222	1.66177	1.33828	-0.914149	0.722087	0.964005	0.310822	0.903096	-1.58925	2.10792	-0.795058	-0.559194	1.00487	-2.06792	1.12784	-0.475504
OTUD3	0.443691	0.357236	-0.416336	0.198282	0.0221907	-0.486529	0.0680145	-0.352233	-0.24199	-0.604793	0.179312	0.356718	0.502993	-0.220267	-0.220132	-0.260008	1.04796	-0.0813207	0.173753	0.399623	0.0485318	0.350176	0.892361	-0.149304	-0.299714	0.519175	0.303007	0.64378	-0.202625	0.413375	0.941439	0.166021	0.0147698	0.254819	0.655703	0.00527404	-0.65705	-0.410766	0.108659	0.171034	0.0604837	-0.647733	-0.115848	-0.793706	-0.714754	0.430576	-0.351723	-0.567445	-0.532161
FRAS1	-0.0948797	-0.150288	-0.0104961	0.0450076	0.000912	-0.230004	0.077704	0.0348395	0.04518	0.148108	0.0243919	-0.135951	0.0887035	-0.0238428	0.0180041	0.0858293	-0.0171111	-0.0309985	0.0723322	0.0418062	0.184125	-0.0636177	-0.0329389	-0.0517201	-0.321671	-0.0309985	0.00800844	-0.0406986	-0.0309985	0.0643077	0.0334901	-0.0714193	-0.179578	-0.00823729	-0.0307801	-0.158039	0.198693	0.0176584	-0.0927367	0.280268	-0.0167033	0.203096	-0.0314103	0.0814688	-0.161629	0.113816	-0.0478133	0.196173	-0.0812099
FRAT1	-0.36411	0.975176	0.51339	0.973061	0.747429	-0.460844	0.0287337	-0.35497	0.952483	-1.13759	0.123826	-0.845689	0.364014	0.492454	0.707755	0.0921253	0.336349	0.0484202	0.867978	1.27212	-0.0401271	0.333657	0.754377	0.76715	1.1689	0.702809	1.0628	1.28687	-0.254	0.819337	-0.454396	1.10422	-0.238525	-0.319946	-0.330989	-0.176821	-1.49782	0.325678	1.45808	-0.0726337	0.923111	-0.848656	-0.861992	-0.757212	-0.611833	-0.0148303	-1.00364	0.647658	-0.238182
FRAT2	-0.232174	0.12966	0.298912	0.399617	0.137091	0.434003	-0.0806782	-0.91885	0.0234752	-0.521903	-0.665383	-1.23303	-0.553376	1.24418	0.127494	-0.726782	0.414526	-0.810187	0.222828	0.135344	-0.0452122	-0.672181	-0.0577745	0.320543	0.312373	0.0540543	0.13171	0.353743	-0.883601	0.0172156	-0.19422	-0.11318	0.313479	-0.512232	-0.23054	-0.474398	-0.423239	-0.121529	0.742232	-0.918552	0.302356	-0.235577	-1.31598	0.313148	-1.26953	-0.261631	0.203993	0.165399	0.288895
AC114730.11	-0.310277	-0.191037	-0.043176	0.0148322	-0.149382	-0.0442772	-0.0970977	0.196005	-0.1817	-0.0776865	-0.254265	0.10992	-0.251878	-0.0937765	0.0315232	-0.135455	-0.193839	-0.0719079	0.0676291	-0.056579	-0.0198406	-0.175365	0.0607334	-0.032873	0.0138661	-0.0830195	0.049988	-0.164917	0.0366878	0.141595	-0.297649	-0.0358923	-0.0240382	-0.150326	0.108835	-0.0607621	-0.0213972	-0.081347	0.0205404	0.0138661	-0.018622	0.1037	-0.262076	-0.0929353	-0.136153	0.0750353	0.67401	-0.203612	0.609786
FRG1B	0.226581	-0.327831	0.0505593	-0.220064	-0.342906	0.277783	-0.382311	-0.233261	-0.197308	-0.188522	-0.152408	-0.613235	-0.0821097	-0.0418848	-0.120482	-0.177917	-0.270032	-0.148834	-0.219815	-0.309225	-0.0797324	-0.34169	-0.434522	0.00473748	-0.1142	0.138334	-0.358224	-0.114168	0.289353	0.0124974	-0.360553	0.0168683	-0.148379	-0.21299	-0.427881	0.247284	0.671578	-0.315361	-0.0291382	0.347644	-0.0890135	0.413529	-0.116626	0.103029	0.276901	-0.102634	0.539964	-0.0397899	-0.228029
FREM1	-0.0626723	0.627428	0.220135	-0.18543	0.185836	-0.340859	0.00318628	0.200637	0.140816	-0.382869	0.7143	-0.0155121	0.0531754	-0.124011	0.241722	0.139236	0.168745	0.0322794	0.00155825	0.206841	0.179243	0.0432297	0.246108	-0.365825	0.159429	0.524651	1.43822	0.495402	0.147183	-0.0157144	0.101691	-0.198778	-0.347433	0.0347428	-0.0283277	0.232157	-3.80045e-05	0.392528	0.733635	-0.0984412	0.374534	-0.0559927	-0.129041	-0.266843	-0.0956744	0.776945	-0.332097	-0.282915	-0.273646
FREM2	1.8844	1.3583	1.47039	0.151143	1.89954	0.358242	0.642401	-0.148088	1.34694	-1.94568	1.44129	1.43307	1.23448	1.863	1.25513	0.526465	-0.288779	0.806887	1.07944	0.944483	1.22133	1.59859	1.27414	-2.37615	0.175796	0.568422	0.869227	1.18365	-0.537662	0.856662	1.64226	1.74541	-2.08595	1.00949	1.02545	-0.176841	2.47531	1.15353	1.29782	-0.559181	1.71033	-2.34845	1.81279	-1.13797	1.83586	0.977914	2.18371	2.08438	-0.572402
FREM3	-0.167592	0.824694	0.00879402	-0.234572	-0.106257	0.0278393	0.0740729	-0.140226	0.15386	-0.233828	-0.238605	-0.158986	0.189635	-0.0735806	-0.26106	0.269628	0.212376	0.14619	0.283187	0.117794	-0.326293	-0.0199177	0.410604	-0.0208147	0.255403	0.26631	0.296994	0.0887757	-0.194606	0.0122691	0.0921648	-0.115667	-0.272126	0.221567	0.100905	0.206712	0.0582223	1.44128	0.200394	0.335152	-0.00808233	-0.254125	2.43662	-0.256444	-0.353749	0.265124	-0.186275	-0.106208	-0.109526
RP11-1008C21.2	0.208579	0.10821	0.0963933	0.24211	0.0634805	-0.157667	0.0994206	0.173275	0.164223	-0.0526678	0.0220272	0.396065	-0.06224	0.0764942	0.0125444	0.0350539	0.00466809	0.122797	0.164803	0.252615	0.247846	-0.0923734	0.322924	-0.161189	0.38586	0.0322774	0.131059	0.0557972	-0.0122065	0.264493	0.556428	0.0758816	-0.204664	0.19156	0.2503	-0.0659322	-0.202041	-0.00283184	0.0355733	0.0830564	-0.0401342	-0.134432	0.269874	-0.188967	-0.290876	0.125741	-0.0247871	0.0236569	0.0588092
CITED1	0.0242745	0.117178	0.151177	-0.391951	-0.654183	0.0441815	-0.395687	0.24454	-0.208517	-0.25765	-0.328384	-0.138978	-0.343623	-0.439413	-0.199898	-0.348635	0.132492	-0.326746	-0.264031	0.659771	-0.289244	-0.0617126	-0.0616625	-0.357599	-0.215535	0.123259	-0.161223	0.541329	-0.12825	-0.397445	-0.117148	-0.0347345	-0.383316	0.451442	0.0956983	-0.177368	-0.126519	-0.636221	-0.486716	1.10887	-0.0647285	0.111627	-0.298383	-0.572107	-0.768699	0.789634	0.194096	-0.581314	0.305729
CITED2	0.533692	0.806521	-0.153874	1.12658	0.318728	-0.724275	0.142107	0.386856	0.658979	0.282965	0.843559	0.596845	0.26032	-1.74463	0.6572	0.197914	0.803692	0.367958	1.1179	1.44322	0.565458	1.51776	1.15831	-1.12417	0.309313	0.259626	0.0913816	1.45319	0.687285	0.706533	0.473777	1.72985	0.122351	0.521221	0.77367	0.21828	-2.21702	-0.172716	-0.0366891	0.48636	1.15977	-3.47638	0.267822	-2.4773	-0.995971	0.509697	-2.93792	0.976971	-1.16004
CITED4	-0.361683	-0.145677	-0.466327	0.0987569	-0.580738	-0.0872404	-0.0388248	0.469313	0.136964	0.690811	-0.0166453	0.764212	-0.220538	0.0602172	-0.588959	-0.230657	-0.0190753	0.343408	-0.162591	0.0785476	-0.360316	0.069275	0.148029	-0.521723	-0.0917041	0.725053	-0.338333	-0.426793	0.750738	0.387992	0.523859	0.179694	-0.0442263	-0.0548386	-0.197269	0.20073	0.383287	-0.251195	-0.166619	0.666971	-0.074905	-0.150717	-0.597367	-0.527164	-0.254264	-0.191695	0.066647	-0.356298	1.05251
FRMD1	-0.212424	-0.227335	-0.0491646	0.116452	-0.413026	-0.17176	0.0982396	0.360876	-0.0362228	-0.132728	-0.00366673	-0.306588	-0.215171	-0.292692	-0.0466346	0.246504	-0.0732494	-0.0207006	-0.10353	0.110739	-0.0468255	0.237119	-0.174012	-0.0317424	-0.296973	-0.308069	-0.235094	-0.00777962	0.336853	-0.00654999	0.142551	-0.0792598	-0.0897442	0.103343	-0.176594	-0.0321281	0.296376	0.017848	-0.591441	0.478432	-0.185385	0.661894	0.17023	-0.0223364	0.185916	-0.323826	-0.289246	-0.161931	0.00623877
FRMD3	0.135328	1.33784	1.14886	1.42365	1.36559	-0.68785	0.0681013	-0.543882	0.791635	-0.9027	-0.0403105	1.04996	1.31798	-1.20649	0.740997	0.986818	0.173299	1.11889	0.223512	1.40146	0.999418	1.06136	0.900151	-1.05613	1.00721	1.05579	0.372229	0.592479	0.770839	1.17014	0.801281	0.484138	-1.18036	1.09313	0.906569	0.465258	-1.572	1.22376	1.4798	0.360627	0.985306	-1.06994	1.26489	-1.00306	-0.289724	1.51241	-1.0727	2.02508	-0.719078
FRMD5	-0.413953	-0.316725	-0.286433	-0.164922	-0.352396	-0.150557	-0.407136	-0.217485	-0.376697	0.0929437	-0.220603	-0.527432	-0.374221	-0.394113	-0.426539	-0.062424	-0.206466	-0.113661	-0.359579	-0.389394	-0.313907	-0.391455	-0.353872	-0.336336	-0.43561	-0.572319	0.287377	-0.513365	-0.187172	-0.0523512	-0.439964	-0.583545	-0.419477	-0.465383	-0.621211	-0.493178	-0.248588	-0.278135	-0.480021	0.106951	-0.646933	-0.263449	-0.203328	-0.202704	-0.143988	-0.555033	-0.161685	-0.430445	0.072868
FRMD6	-0.47994	-0.00823906	0.238383	-0.875775	-0.109301	1.09574	0.455016	0.149609	-0.302473	2.42803	0.425288	-0.142997	-0.35835	1.34242	-0.238371	-0.132715	0.233687	-0.230183	-0.34812	-0.200759	0.138592	-0.811608	-0.651158	1.98586	-0.434775	0.345697	0.581791	-0.507085	-0.399634	-0.534311	-0.909709	-1.96664	1.38793	-0.0945179	-0.702307	-0.0377609	2.09363	0.305876	0.374216	-0.877682	-0.309778	1.67451	-0.528767	2.46035	0.754949	0.237743	1.0966	-0.211824	1.26186
FRMD7	-0.159909	0.188232	0.13076	-0.101605	0.0284855	-0.0691281	0.147613	0.0600316	0.0625549	0.0130656	-0.0948351	0.146794	-0.0751507	0.168223	-0.0129673	0.0271735	-0.00105738	0.0623802	-0.252141	0.00167553	0.00494855	0.0166542	-0.116107	-0.0865936	0.00926637	-0.128503	0.187596	-0.120004	-0.151898	0.126548	-0.0362815	-0.139868	-0.0746759	-0.0677616	0.106753	0.237482	-0.0612898	-0.159909	-0.0908556	-0.222411	-0.0982721	0.465912	0.0603263	0.0979501	0.0507508	-0.188031	-0.0451183	-0.156134	0.133041
FRMD8	0.332318	-0.195632	-0.0814316	0.143027	-0.150583	0.0789368	0.107063	0.055372	-0.387261	-0.108878	0.00980377	0.161643	-0.365945	-0.0469734	-0.200485	0.01714	0.128249	-0.0902948	-0.0314347	0.0674718	0.491661	0.00685021	0.161032	-0.0759305	-0.307844	0.412438	-0.227546	-0.186471	0.533534	-0.0634572	0.385702	-0.363175	0.0910476	-0.293808	0.45134	-0.17519	0.130916	-0.0962763	-0.326368	-0.0282671	0.416066	0.231862	-0.0151053	-0.135791	-0.0771155	0.176035	-0.0921793	-0.118793	0.329821
HIBADH	-0.259995	-0.0827773	-0.382456	-0.0927436	0.240741	-0.2951	0.013244	-0.0237839	0.543731	-0.388866	0.711549	-0.239431	-0.139737	0.403935	-0.770997	-0.539471	-0.456805	0.141678	0.186301	-0.384877	-0.458437	-0.158298	-0.654388	-0.450332	-0.243507	0.24735	0.621545	0.278871	-1.29402	-0.150925	-0.234982	-0.370142	1.14343	0.0277188	-0.167539	0.250994	-0.435949	-0.553184	0.171044	-1.31617	-0.160025	-1.2129	-0.60537	-0.11899	-1.04008	-0.32435	0.374859	-0.485903	-1.2917
AC009120.6	0.0928471	0.188633	0.255028	-1.19185	0.0991089	0.341204	-0.586884	-0.386575	-0.0953872	-0.556505	-0.0315068	0.329939	0.139911	1.21462	0.280585	-0.0612186	-0.0566659	-0.360236	0.174212	-0.498783	-0.0837441	-0.417801	-0.221489	0.598188	0.0798456	-0.110095	0.560419	-0.273259	-0.547903	0.121507	-0.262533	-0.0804842	0.219333	-0.355882	0.35706	-0.196551	-0.741452	-0.0012221	0.331855	-0.439866	0.213658	0.823882	-0.327563	1.16081	-0.123063	-0.0700451	0.235999	0.226068	-0.252622
ZWILCH	-0.819281	-0.286965	-0.637731	-1.41167	-0.60207	0.520586	-1.27165	-1.1334	-0.59776	0.319381	-0.392645	-0.79008	-0.573729	0.700081	-1.06937	-1.0665	-0.905978	-0.429122	-0.23156	-1.25917	-0.659837	-0.745146	-0.770211	0.656258	-0.610455	-0.301305	-0.787412	-0.955138	-1.56655	-0.915988	-1.04614	-1.19278	1.54934	-1.0525	-1.26212	-1.00576	0.797644	-1.03831	-0.576123	-1.32297	-1.00685	1.89974	-0.440549	1.76207	0.282846	-0.504265	0.941258	-0.647962	-0.237485
RP11-669M16.1	-0.297256	-0.0223803	0.0612698	-0.259796	-0.328025	0.0944597	0.144112	0.163693	-0.115694	0.0838473	-0.179851	0.0778624	-0.203287	-0.219681	0.0898259	0.0159213	-0.127624	0.126487	0.259391	0.0406699	-0.0956685	-0.168977	-0.114387	0.149325	-0.00367835	0.0790516	-0.219173	0.141268	0.19117	0.000819	-0.119736	0.123003	-0.0991766	-0.0608454	-0.065316	-0.0191103	0.462535	-0.0856911	-0.259819	0.309294	0.0295238	0.529711	-0.296488	-0.0282461	0.626507	0.0817358	0.724257	-0.229367	0.389482
GLYCTK	-0.0479911	-0.258787	-0.00266425	0.373977	-0.272012	-0.0111865	0.178624	0.304213	-0.245331	-0.0724771	-0.16029	0.10114	0.00125618	-0.507814	-0.12137	-0.0676984	0.0828999	0.233558	0.0132219	0.461865	-0.0251204	-0.0684438	0.129862	0.0518606	0.000435947	0.0529293	-0.18819	0.0233621	0.241196	0.101977	0.209482	0.0772006	-0.326464	0.194552	0.111219	-0.0339219	-0.143763	-0.109905	-0.3402	0.341175	-0.101366	0.345098	-0.220516	-0.474927	-0.365016	0.00523811	-0.0813055	-0.0282467	-0.0453802
GOLGA6L11P /// GOLGA6L11P /// GOLGA6L16P /// GOLGA6L16P	-0.422384	-0.264077	-0.207767	0.00814946	-0.411969	0.479179	-0.0879816	0.0941681	-0.0577275	0.0584694	-0.453802	-0.0959975	-0.457204	-0.0214411	0.0456013	-0.113039	-0.0389077	-0.0577278	-0.0877185	-0.0851585	-0.312046	0.129023	0.20366	-0.247114	-0.482776	-0.0939626	-0.188551	-0.269776	0.267211	-0.274392	-0.0309334	0.169231	-0.0440171	0.224108	-0.398023	0.000323	0.541865	-0.0923081	-0.338471	0.415876	-0.254791	0.829906	-0.309883	-0.151805	-0.103773	-0.0257404	0.377472	-0.17819	0.087039
FRRS1	0.0226752	0.124981	-0.162888	-0.0204585	-0.0498614	0.244612	-0.143602	0.0909292	-0.147434	0.056787	-0.0317584	0.0478611	-0.12	0.407407	0.0448143	0.0934348	-0.0647906	-0.13636	-0.133518	-0.0107582	-0.0586863	0.00666509	-0.109544	-0.0688435	-0.152339	-0.0982233	0.144158	0.0475694	0.27513	0.206769	-0.0846118	0.0907852	-0.00673132	-0.120097	-0.000366	-0.00830056	0.423308	0.0172079	-0.258244	0.105071	-0.00423045	0.121991	-0.260978	0.0755246	0.0606349	-0.127487	0.185185	-0.123655	-0.245518
A2M	0.427056	0.284571	0.643213	0.568595	0.478643	-0.239992	0.385832	0.573793	0.158119	-0.22909	0.497095	0.55041	0.459767	-0.280021	0.434011	0.642636	0.634697	0.41681	0.545576	0.633524	0.484595	0.45363	0.621986	-0.223873	0.357847	0.401404	0.649329	0.475666	0.538939	0.527035	0.617346	0.248533	-0.404039	0.660968	0.213943	0.355929	-0.781815	0.541713	0.373203	0.2396	0.656764	-1.28099	0.151567	-1.53847	0.272493	0.682416	-0.715191	0.543799	-0.714801
ABO	0.00668646	-0.68197	-0.0917266	0.158884	-0.793574	0.448085	-0.143085	0.442487	-0.565965	-0.0528479	-0.388142	-0.254659	-0.403843	-0.484267	-0.483977	-0.165863	-0.0362162	-0.238113	-0.0423916	0.00440488	-0.0371626	0.249511	0.0865992	0.189704	-0.248302	0.279361	-0.504608	-0.286679	0.456362	-0.147395	0.356145	0.0272216	-0.0998709	0.335759	0.32066	0.259189	0.121887	-0.223962	-0.310586	0.125514	-0.106421	0.613357	0.173427	-0.405133	-0.218092	0.0943345	0.314717	-0.366907	-0.553639
ABR	0.103214	0.208006	-0.141431	-0.231084	-0.585844	-0.0746122	0.298013	-0.396246	0.00462405	-0.33374	0.0065509	0.289204	0.115506	-0.250334	-0.200163	-0.379689	0.0277527	0.167995	0.518611	0.29265	-0.216685	0.761966	0.473451	-0.0655248	0.420589	0.538178	-0.146846	-0.179237	0.227795	0.194686	0.834124	0.969938	-0.395384	0.312257	0.1698	0.0125606	-0.663964	-0.251836	-0.285111	0.231529	-0.287889	-0.550534	0.229599	-0.983588	-0.635163	0.557353	-0.621825	0.220099	-0.883062
ACD	-0.781227	-0.178757	-0.60745	-0.316175	-0.204324	0.898588	-0.349306	-0.359326	-0.332636	0.0252118	-0.355972	-0.186776	-0.535258	0.456495	-0.234632	0.0794744	0.480711	-0.26142	0.0528936	0.486812	-0.500048	0.00303479	0.18655	0.195507	-0.197205	0.151737	-0.172767	-0.149596	-0.0503652	0.389502	-0.017266	-0.203724	-0.431683	-0.247074	-0.378631	-0.271005	-0.233942	0.0241603	-0.351179	0.0331522	-0.537441	0.172923	-0.796261	-0.512358	-0.398156	0.431913	1.01112	-0.354973	0.845077
ACE	0.233008	0.382046	0.216749	0.927417	-0.0785853	-0.251318	0.417108	-0.403624	0.00554234	-0.382315	1.28042	0.222365	0.351348	-0.960241	0.684758	0.013069	1.02231	0.513139	0.61092	1.05355	0.700089	0.83281	1.01374	-0.193663	0.280145	1.55766	0.310464	0.319818	0.675136	1.7827	0.644923	0.752302	-0.469747	0.494569	0.361248	-0.216728	-1.02337	0.340128	0.304786	1.96641	0.533137	-1.07846	0.142502	-1.57222	-0.807926	0.722188	-0.190786	0.455464	-0.283498
ACR	0.11509	0.355881	-0.104186	0.184291	0.108272	0.237522	0.0750003	0.296656	-0.286176	0.0176752	-0.158948	-0.117356	-0.146638	-0.463305	0.101081	-0.074345	-0.00483414	-0.006269	-0.0421263	0.103651	0.223807	-0.0313928	-0.146749	0.145355	0.0893152	0.214754	-0.34012	-0.359909	0.411261	0.0770003	-0.25488	0.00229161	-0.0375715	0.0937992	-0.0956865	-0.0707092	0.135707	-0.146502	-0.00495519	0.283583	0.322349	0.350591	0.0384098	-0.0682951	0.167262	-0.155317	0.0783886	-0.252397	0.374475
ADA	-0.613289	-0.442118	-0.0319357	-0.989477	-0.388178	0.66515	0.192023	1.02742	-1.21453	0.279186	0.855494	-0.104173	-0.806543	0.830748	-0.0839794	-0.630016	-0.060663	-1.07326	0.166008	-0.245803	-0.641841	-0.723308	-0.580027	2.48479	-0.0573739	0.672012	-0.543742	-0.532242	0.0402245	-0.965821	-0.105028	-1.10095	0.89148	-0.363675	-0.633807	-0.459024	0.417395	-0.695772	-0.645255	-0.110513	-0.803021	0.48538	-0.962033	0.435349	0.0496418	-0.0983626	1.38335	-1.08879	1.10691
ADK	-0.275527	-0.0493934	-0.0338997	0.0611289	0.26756	-1.35916	0.155994	0.0788305	-0.164668	0.518552	-0.0313364	0.20759	0.00393139	-0.228737	0.0219411	-0.100909	-0.141049	0.198736	0.120816	-0.202879	-0.368418	-0.00750279	-0.253067	-0.256925	-0.227106	-0.117895	0.169778	0.0359951	-0.539337	-0.316701	-0.508332	0.55068	0.292386	0.0197805	-0.186546	-0.374784	-0.920031	-0.0141691	0.103133	-0.240117	-0.127295	0.592178	0.651794	0.723826	-0.75512	-0.309604	-0.445823	0.442666	0.0227441
ADM	-0.713173	-0.0754479	-0.455778	-0.641455	-0.504069	1.68924	-0.0303484	0.0275523	-1.92265	1.72523	-0.137692	1.46234	-0.338009	1.09835	0.0463092	0.64445	1.39115	0.301322	-0.00335755	-1.55094	0.73328	0.489299	0.188227	-0.560969	-0.138392	0.579909	-1.62996	-0.878554	1.8542	-0.641	-0.0276678	-2.0073	1.46608	-0.177886	0.811548	0.486576	1.1218	-0.0696209	-0.43497	-1.14522	-1.10488	0.685921	-0.170406	1.56182	1.08736	-0.462605	1.7201	-0.824737	0.8703
ADO	-0.0655695	0.283913	0.545608	-0.156525	0.484081	-0.550342	0.0476823	-0.258789	-0.018899	-0.333886	0.186944	0.203743	0.0111087	0.990716	0.407296	0.0752625	0.12888	0.268229	0.217031	0.203459	-0.38997	-0.202849	-0.152959	0.613331	0.390776	-0.0714086	0.242623	-0.0144901	-1.36141	-0.158368	0.124498	0.0086913	-0.178254	0.246594	0.417553	-0.116002	-0.3794	-0.029353	0.490667	-0.467643	0.0502839	-0.234088	0.639638	0.49828	0.0136513	0.263232	-0.938196	0.00871954	0.845948
AEN	-0.696072	0.330072	-0.205104	-0.340212	-0.295194	-0.0167049	0.202981	-0.099677	-0.536435	-0.285144	-0.229368	0.676143	-0.492583	0.203707	0.371329	0.337562	0.538041	0.157905	-0.445852	-0.278589	-0.0559502	0.157899	0.0609425	0.262837	-0.0961736	-0.278663	-0.0534182	-0.181105	0.446038	-0.528895	0.350929	-0.142169	-0.151535	0.0498662	0.455232	-0.140881	0.326139	-0.373388	-0.131957	-0.159831	-0.611677	0.515755	0.101131	-0.0694991	0.525494	-0.264943	0.510942	-0.544564	0.497488
AES	-0.138771	0.355712	-0.907855	0.501687	-0.0637027	0.56129	0.128	0.0766649	0.282802	-0.427619	0.295898	0.133749	0.289138	-0.434166	-0.286031	-0.684413	0.203376	0.446785	-0.0487848	0.876218	0.0767994	0.222235	0.564784	-0.0954043	0.211667	0.689979	-0.312858	0.149275	-0.0953398	0.635706	0.446374	0.848298	-0.0229213	0.280256	-0.411373	0.354182	-0.231037	-0.0419307	-0.0453488	0.536285	0.040067	0.253222	-1.04221	-1.06983	-1.30515	0.570232	0.167119	-0.111997	0.767368
AFM	0.0893667	-0.122055	-0.0592191	0.0386461	0.121303	0.177562	0.0718913	0.180409	-0.0518872	0.0642518	0.138571	-0.124218	-0.125605	-0.165932	0.0432287	0.145958	0.115427	-0.248482	-0.0181118	0.0196238	-0.0511916	-0.00465815	-0.0823016	-0.0634799	-0.00494635	-0.165236	0.0344043	-0.107456	-0.0498814	0.0291598	-0.190036	0.00116354	0.118202	-0.130845	0.0862398	-0.16536	0.0148534	0.0933096	0.0459851	-0.0908358	0.0441758	-0.0233036	0.000114	0.0533018	0.146587	0.147841	0.354166	-0.21102	0.142972
AFP	-0.404274	-0.274682	-0.264586	0.192146	-0.144728	0.0577812	-0.112432	-0.158146	-0.205904	0.0715682	-0.206442	-0.23941	-0.0788916	-0.046754	-0.141521	-0.267036	-0.312536	0.0778084	0.161065	-0.11096	0.0751456	-0.314839	-0.0839385	0.044828	-0.179732	0.0328068	-0.101914	-0.00154598	-0.179071	-0.260624	-0.0590945	-0.254824	-0.331169	-0.343787	0.0130954	0.0944711	0.367468	-0.0560824	-0.277932	-0.0347714	-0.235303	-0.144903	-0.174967	0.0467686	0.0639824	-0.18042	0.267177	-0.345394	0.336618
AGA	-0.472311	-0.208217	0.0828003	-1.06388	0.498946	-0.472258	0.2576	0.634155	0.328064	-0.00234992	0.302688	-0.0297903	-0.167273	0.256285	0.476059	-0.375802	-0.65157	-0.154163	0.221169	0.0506897	-0.683434	0.0269656	0.0134432	0.203669	-0.315545	0.283213	0.34022	0.374614	-0.5434	0.00927597	-0.566499	-0.179757	-0.184917	-0.064097	-0.573717	-0.508605	0.548603	0.109334	0.548302	-0.919123	0.137413	-1.15903	-0.140532	0.0829964	0.515741	0.0457501	-0.438518	-0.0126128	-0.281284
AGK	-0.411684	0.204048	-0.246166	-0.179133	-0.0320101	0.100912	-0.011053	-0.088851	0.0873411	0.227667	-0.0483819	-0.018894	-0.00443704	0.502813	-0.193976	-0.239567	-0.281074	-0.0561676	0.0944085	-0.0638474	-0.458398	-0.288608	-0.135333	0.400203	0.0695771	-0.0178867	0.0529061	-0.126866	-0.568815	-0.257898	-0.265937	0.0786078	0.157491	-0.10442	-0.279608	-0.335689	-0.112901	-0.318951	-0.051233	-0.416899	-0.133984	0.574467	-0.254246	0.552796	0.163961	-0.245568	0.949877	-0.334633	-0.0735582
AGL	0.243332	-1.11336	0.407251	-0.586133	0.348796	-0.353261	-0.860028	-0.0535818	0.522464	0.051431	0.712076	-0.0669557	-0.0606864	0.259334	0.200014	0.313992	-0.943065	-0.400373	0.220727	0.00205828	0.147762	-0.16243	-0.260451	-0.464353	-0.213273	-0.162373	0.540749	0.0777603	-0.651186	-0.151201	-0.0544054	0.77359	0.651184	-0.172468	-0.536336	-0.530227	-0.911613	0.471103	0.525596	-0.332038	0.179973	-0.711742	0.679418	0.684203	-0.137904	-0.0866656	-1.51743	0.473661	-1.08993
AGT	-1.0855	0.805987	-0.766606	-0.0440523	-0.938062	-0.39412	0.647384	-0.960777	-0.897607	-0.981289	-0.949378	-0.534765	-1.05389	1.28322	-0.850682	-0.336434	0.288157	-0.0745941	-0.957439	-0.758303	1.13467	0.273247	0.818546	-1.29708	-0.727662	-0.676213	0.544715	-1.15915	-0.914524	-0.312723	-0.0888125	-1.06649	-0.820392	-1.04765	-0.178495	-0.695444	-0.526075	0.983396	-0.0499798	-0.93861	-0.0905936	-1.44174	-1.30236	-1.51804	-1.11523	-0.45564	0.0691366	-0.760441	-0.915252
AHR	0.689108	0.0219921	0.66675	0.194305	0.574802	-0.641653	0.325235	0.387371	0.568274	0.679363	0.337077	0.743059	0.437715	-0.21593	0.481413	0.711698	0.685691	0.2828	0.184432	0.028856	0.60154	0.774183	0.481001	-0.715781	-0.180339	0.0871523	0.411065	0.465619	1.2039	0.268226	0.765182	0.268736	-0.158549	0.808181	0.0898447	0.14066	-0.530049	0.40997	-0.0435318	0.823668	0.402104	0.177135	1.16927	-0.108402	0.0439191	0.416721	-0.417167	0.69073	-1.34516
AIP	-0.49661	0.110166	-0.353363	0.391232	-0.0215565	-0.493332	0.134014	0.460777	0.123605	0.0375327	0.29304	-0.0210127	-0.157597	-0.16966	-0.146351	-0.157655	0.176949	0.16356	0.253739	0.273101	-0.455672	0.0720869	0.212635	-0.109624	0.101527	0.285461	-0.00856943	0.319656	-0.449536	0.170706	-0.02111	-0.0425717	-0.0389853	0.2181	-0.400009	-0.23083	-0.532034	-0.0493366	-0.187266	-0.571323	-0.462521	-1.04002	-1.30818	-1.21059	-0.832037	0.189618	0.0744219	-0.418527	0.100753
AK1	0.680386	0.944973	0.547699	1.07739	0.900867	-0.402886	0.46399	0.240883	0.959611	-0.292089	0.696334	0.675364	1.00997	-1.46428	0.60665	0.41702	0.43752	0.82261	0.861613	1.13043	0.35108	0.799667	0.709701	-0.878898	0.803999	0.639242	0.578156	0.880657	-0.112049	1.29727	0.75007	1.27816	-0.63812	0.822274	0.218524	0.516835	-1.14836	0.652068	0.89777	0.714614	0.857206	-1.34073	0.45604	-1.32966	-0.502029	0.724718	-0.629015	0.466196	-0.576881
AK2	-0.0304404	0.259427	0.0879402	-0.0177861	-0.0628344	-0.40901	-0.0582238	-0.0335889	0.0142368	-0.0634112	-0.0335589	0.1523	0.31484	-0.698775	-0.0336817	-0.187086	0.351009	0.0692737	0.456714	-0.288479	-0.0456966	-0.101356	0.238997	-0.554197	-0.096074	0.703417	0.0404934	0.0426235	-0.427342	0.116342	0.366449	-0.211276	1.08154	-0.0220052	-0.123979	-0.265308	-0.795448	-0.204452	-0.135801	0.158316	0.248281	0.164487	-0.293648	-0.210082	-0.684474	-0.0705496	-0.693965	0.0521608	-0.0987747
AK3	0.495716	-0.00863497	0.351651	-0.46206	0.329402	-0.201231	0.201801	-0.310215	0.30085	0.791419	0.237222	-0.232778	0.0604289	-0.381559	-0.217345	-0.0254245	0.12833	0.0701854	0.117351	-0.115588	0.249754	0.251904	0.287708	0.112276	-0.253078	0.346372	0.268927	-0.0129273	0.259385	0.411354	-0.0494421	0.200585	0.664496	0.281109	-0.134579	-0.234165	-0.430363	0.522264	0.106722	0.381573	0.156389	-0.965358	0.266102	0.787527	-0.136486	0.175645	-1.70354	0.503426	-1.06509
AK5	-0.124383	0.00427274	-0.326519	-0.0565807	-0.491976	0.153491	-0.102353	0.0611311	-0.0843565	-0.0663441	-0.106617	-0.0892124	-0.228184	-0.211371	-0.0424844	-0.0731065	-0.198237	-0.228045	-0.0672983	-0.202187	0.227237	-0.0687722	-0.00904864	-0.141974	-0.0782397	-0.05656	-0.0872175	-0.18632	0.185131	-0.14889	0.0424184	-0.147301	-0.10293	-0.144376	0.0110943	-0.0718904	0.280089	-0.110619	-0.0818558	0.172522	-0.0741174	0.0584256	-0.163901	-0.0102299	0.0199673	-0.152861	0.264677	-0.121296	0.289827
AK6	-0.163063	0.16834	0.443495	-0.186772	0.205968	0.259281	0.415418	-0.00610813	-0.212803	-0.291256	-0.123219	0.547337	-0.163938	-0.222306	0.541386	0.546917	0.751558	0.266656	-0.166312	-0.403364	-0.127855	0.454035	-0.133204	-0.323118	-0.141752	-0.153504	0.0213502	0.193018	0.310253	-0.638587	0.0702115	-0.514986	-0.035534	0.442293	0.229584	0.145246	-0.476893	0.423995	0.104862	-0.49844	-0.128319	-0.718232	0.249963	0.337381	0.0100407	-0.0445869	0.655476	0.29889	-0.609334
AK7	0.118546	-0.291047	-0.101198	-0.10342	-0.0585635	-0.198705	-0.0742031	0.286303	0.170063	-0.0239832	0.090601	-0.0240719	0.109555	-0.0970443	-0.180246	0.0723204	-0.0509967	-0.120517	-0.0181271	0.0266325	0.22693	-0.14775	-0.164079	-0.321574	0.00964693	-0.213691	-0.40362	0.00856278	-0.0284196	0.147127	0.016434	0.00396821	-0.111146	-0.0686226	0.17558	-0.0167548	-0.194617	0.0239576	0.0457636	0.325582	0.110429	0.0768926	0.0331462	0.0484283	-0.108251	-0.0752395	0.035615	0.0292109	-0.231334
AK8	0.322118	-0.443003	-0.250212	0.342427	-0.187765	0.114505	-0.0205631	0.277421	0.657274	-0.0533428	-0.023131	-0.0314528	-0.242042	0.0365285	-0.576056	0.480614	0.00204734	0.104364	-0.474675	-0.172509	0.0419603	-0.155398	-0.588477	0.41935	0.0422053	-0.253851	-0.577822	-0.0351615	0.0328879	-0.046534	0.0251372	-0.161485	-0.00597714	-0.074613	0.216418	0.366775	-0.153525	0.0268229	-0.358727	0.392873	0.0730929	0.172339	0.0452487	0.00278251	0.0769544	-0.388377	0.215227	0.0133974	0.296315
AK9	0.913385	0.0810278	-0.27441	-0.250542	0.413934	-0.226239	-0.00778867	-0.324655	1.51486	-0.484357	-0.0311167	0.0210364	0.216406	-0.514439	-0.0866432	0.00746272	-0.00032	-0.293251	0.0900353	-0.0493085	0.705802	-0.160326	-0.0469932	-0.406199	0.387484	0.0841128	-0.00126845	0.207782	-0.0171696	0.0574836	0.013002	0.133791	-0.276437	0.0994691	0.379873	0.525825	-0.333472	0.0149543	0.245797	0.200746	-0.199607	-0.315076	0.202635	-0.406272	-0.35596	0.00980121	-0.429597	0.0501574	-0.298829
ALB	0.0418124	-0.212748	-0.151173	0.0216054	-0.100585	-0.0400412	-0.0267549	0.0654638	-0.054714	-0.114069	0.047579	-0.0929268	-0.0828165	-0.175057	-0.0419264	-0.198479	-0.0281011	-0.0951011	-0.0554231	0.020989	-0.00284139	-0.123967	-0.0359151	-0.160444	-0.0660747	0.0221763	-0.143243	-0.12213	0.0019892	-0.0844152	0.108164	-0.119137	-0.0760168	-0.0199137	-0.0378356	0.0366028	0.300757	-0.111353	-0.023342	0.0305729	-0.0917689	0.245191	-0.0952108	0.019393	0.0264108	0.00303696	0.0642126	-0.0948534	0.0698441
ALK	0.543585	-0.337462	1.34538	-0.0231327	-0.167274	-0.0488621	0.0586088	0.273064	-0.125028	0.0527558	-0.0251051	0.195455	-0.14938	-0.272077	0.275617	-0.17541	-0.268728	0.0837376	0.101951	-0.241708	-0.126428	0.00574502	-0.436995	0.500276	0.0847266	-0.361574	0.0548585	-0.161139	-0.157609	-0.28935	-0.313931	-0.226592	-0.0969586	-0.123798	-0.124541	0.248293	0.316666	-0.195056	-0.292077	-0.179192	-0.504095	0.182588	0.218441	-0.205781	0.034059	-0.286463	0.0792895	-0.170889	0.0647258
AMN	-0.0808807	-0.111437	-0.0533325	-0.0266607	-0.311291	0.193317	-0.111998	-0.282584	-0.289885	0.161349	-0.193997	-0.0269414	-0.0766475	-0.0519133	0.0989018	0.105177	-0.439195	-0.179497	-0.0899585	0.029246	-0.306618	0.114014	-0.31218	0.0918362	-0.0137392	-0.108238	-0.329387	0.225355	0.124896	-0.418685	-0.162195	0.147612	-0.104786	-0.0719206	0.17473	-0.0065089	0.292441	-0.152448	-0.35419	0.166952	-0.140924	0.624389	-0.0512881	-0.0105156	-0.120732	-0.0804172	0.698278	-0.139781	0.258177
AMT	0.588815	0.0456056	0.511164	-0.137423	0.443999	-0.817981	-0.233679	-0.237613	0.76556	-0.247171	-0.0258323	0.172347	0.204761	-0.8133	0.185937	0.624413	0.456763	0.310903	0.489764	0.327036	0.209922	0.0941731	0.500096	-0.343788	0.63862	0.421733	0.699214	0.652069	-0.0110303	0.536488	0.662325	0.229714	-0.00624879	0.261011	0.347175	-0.208004	-0.878831	0.492484	0.418031	0.294453	0.373282	0.281442	0.0526146	-0.845047	-0.154695	0.408369	-0.291101	0.100174	-0.808179
ANG	0.273168	1.14584	0.922905	1.07158	0.854879	0.214632	0.16503	-0.0824611	0.91194	-0.749549	0.308283	0.876532	0.945106	-0.236353	0.54038	0.759272	0.242461	0.660622	0.390251	0.662139	0.544953	0.896353	0.727952	-0.777593	0.673844	0.48323	0.156483	0.91704	-0.381077	0.399822	0.338398	0.778442	-0.823101	0.770865	0.443533	1.11098	-1.03869	1.30841	0.685373	-0.533322	0.526122	-1.68716	0.175186	-1.21382	-0.72569	0.560579	-1.89508	1.04701	-1.18329
APC	0.108157	0.502296	0.368235	-0.147108	0.509764	-0.0266777	-0.00970002	-0.169693	0.403514	-0.234724	0.454146	0.0184162	0.662256	-0.0531898	0.020909	0.11056	-0.0106592	0.26365	0.47568	-0.266572	0.13784	0.110596	0.3553	-0.282626	0.221137	0.665174	0.405246	0.360977	0.207218	0.221501	-0.0355253	0.198309	-0.146784	0.264058	-0.319398	-0.102265	0.229754	0.069214	0.513269	0.195609	-0.0941314	-0.353507	0.962139	0.367341	-0.154426	0.310978	-0.875184	0.524066	-0.0355473
APP	0.271794	-0.229398	-0.352445	-0.0326205	-0.501361	0.43184	-0.263208	-0.848239	-0.46615	0.5344	-0.0672757	-0.290508	0.0154318	-0.451971	-0.131587	0.647585	-0.385395	-0.426779	-0.386165	0.133701	0.530277	-0.168258	0.328536	-0.723761	-0.166926	0.488078	-0.504224	-0.177067	0.941014	0.059528	0.248483	-0.253237	-0.0839993	0.0847113	-0.0926438	-0.251661	-0.593625	0.937096	-0.260218	0.678775	0.272595	0.518733	0.663317	0.199615	0.308643	-0.368671	-1.06515	0.263725	-1.776
LOC101930296 /// TBC1D26 /// ZNF286A	-0.245557	-0.426113	-0.132793	0.226179	-0.113237	-0.333759	0.0161752	0.44987	-0.117856	0.167347	-0.230534	-0.18818	-0.151789	-0.144241	0.312453	0.320642	0.0396486	0.00978038	-0.271647	0.00907983	-0.025073	-0.0644502	-0.27832	-0.118027	-0.380304	-0.202592	-0.231116	-0.348513	0.18326	0.180423	-0.0561349	-0.0839182	-0.216572	-0.0361144	-0.0292631	0.158338	-0.0215266	0.0538018	-0.155741	0.500601	-0.0511106	0.300214	-0.0234428	-0.0363309	-0.0419195	-0.0490957	0.437634	-0.0244215	0.238207
B2M	0.406595	0.125735	0.166755	-0.0159366	0.25068	-0.145566	0.0249888	0.00531925	-0.125661	-0.136716	-0.0289234	0.155198	0.267107	-0.322538	0.190192	-0.0695499	-0.124938	0.110372	0.442888	0.0763239	0.305744	0.122804	0.116362	0.0665281	0.0966802	0.16697	0.116009	0.138489	0.407317	-0.0454128	0.23038	-0.049498	0.2332	0.06828	0.0684227	0.0510867	0.0157169	-0.0806304	0.180434	0.194055	0.236882	-0.149381	0.380075	0.118721	0.0758891	0.334416	-0.581402	0.235294	-0.232369
AQR	0.224263	0.720731	0.0617068	0.16794	0.309127	-0.00544621	-0.0681488	-0.0982312	0.374364	-0.559285	0.139201	0.240607	0.501688	-0.528982	0.10339	0.0962884	0.178193	0.473693	0.20664	0.0817527	0.29619	0.404834	0.211882	-0.478929	0.199813	0.212675	0.346951	0.165383	-0.184416	0.389126	0.254988	0.265528	-0.150238	0.179487	0.242454	0.403304	0.23572	0.120879	0.616115	0.0838136	0.269451	-0.423472	0.308729	0.818422	0.210447	0.122742	-0.973421	0.624391	-0.684621
ARC	-0.123485	0.196107	-0.182369	-0.0321385	-0.621663	-0.351863	0.197018	-0.0563222	-0.719587	-0.0406687	-0.0446706	1.77123	-0.21935	-0.47615	2.62513	0.0563792	1.62583	0.19503	-0.340245	0.413918	0.487063	1.1279	0.393561	-0.914992	0.444852	0.778608	-0.25103	0.367755	3.0749	0.383385	0.895048	0.133054	-0.283146	0.211268	1.57981	-0.247166	-0.749019	-0.3457	0.0908566	0.115625	0.060874	-0.331105	-0.812363	-0.402061	-0.432663	1.34178	-0.245601	-0.247904	-0.613142
ARX	0.430207	-0.572996	-0.114197	-0.00686509	-0.141622	0.00881148	-0.146941	-0.152282	1.23253	-0.49801	-0.368068	-0.401408	-0.21229	-0.482408	-0.593004	0.715969	-0.110157	-0.170949	-0.307578	-0.367132	-0.168247	-0.421534	-0.365825	-0.185602	-0.132049	-0.562297	-0.496947	0.438647	-0.089475	-0.0743215	-0.0733052	-0.113463	-0.271022	-0.0638119	0.411101	0.986439	-0.0298963	-0.21453	-0.206896	0.00618038	0.25195	-0.0355512	-0.43199	-0.698505	-0.299385	-0.580427	0.0218592	-0.228964	-0.09374
ASL	0.144013	0.165636	0.31205	0.58968	0.25285	0.563176	0.495912	0.337858	0.351326	-0.739836	0.320125	0.50153	0.389128	0.0494387	0.38435	0.16317	0.377145	0.346261	0.299561	0.789578	-0.122367	0.818819	0.269223	-0.313845	0.499166	0.610547	0.264416	0.63513	-1.13639	1.22095	0.734128	0.910068	-0.00961631	0.452701	0.124591	-0.0981606	-1.2743	0.174105	0.0496194	0.235962	0.287938	-1.13167	-0.995041	-1.29949	-2.28697	0.511037	-1.65715	0.258465	-0.264164
ATM	0.0688604	-0.160393	-0.330134	0.0172387	0.0851636	-0.466612	-0.18001	0.150179	0.00864149	0.0738581	0.0363883	-0.0708342	-0.0212493	-0.427934	0.409673	0.414434	-0.334503	-0.0929629	0.3523	-0.330768	-0.174619	-0.04472	-0.0528373	0.238297	-0.238585	0.0304636	0.208385	-0.0794674	0.194429	0.0880907	-0.146582	-0.195967	0.000776419	0.197443	-0.362358	0.136249	0.411161	0.244887	-0.126985	0.0687949	0.0411973	0.121673	0.310361	-0.0535995	0.62227	-0.128266	-0.300043	0.000311117	-0.0922274
ATR	0.00934338	-0.188073	0.19805	-0.585408	0.0371672	0.231125	-0.190329	-0.337557	0.0330199	0.119794	-0.660338	-0.404433	-0.0782611	0.34463	-0.0356827	-0.133112	-0.159991	-0.385326	0.0380551	-0.381679	-0.0338895	-0.386847	-0.44	0.581338	-0.0596135	-0.184719	0.250009	-0.131277	-1.19218	-0.0078883	-0.239386	-0.134348	0.411343	-0.235302	-0.0129816	-0.39932	0.391384	-0.131691	0.104214	-0.281896	-0.122753	1.44902	0.316657	0.841052	0.286714	-0.223163	0.144695	0.0490133	-0.67971
AUH	0.406646	0.0502874	0.70441	0.180182	0.628587	-0.892487	0.153762	0.534401	0.605627	0.971959	0.692004	-0.354418	0.190434	-0.18043	0.350674	0.32325	0.157522	-0.0535536	0.338011	0.133266	-0.367588	0.151613	0.24391	-0.423971	0.340144	-0.128421	0.551052	0.414327	-0.679279	0.0712014	-0.0902773	0.407782	0.685152	0.135549	-0.0692124	0.079287	-2.25106	0.658373	0.307433	-0.194236	0.318771	-0.861016	0.110188	-0.399119	-0.0360933	0.0445212	-0.601668	0.495922	0.0750119
AVP	-0.0599227	0.50617	-0.378803	-0.158625	-0.171073	0.27454	0.00556287	-0.0328123	-0.260318	0.132334	-0.345573	0.0898613	0.0534422	0.164195	0.236918	0.00941634	-0.109458	0.345921	-0.47588	-0.0581538	-0.445267	-0.0833842	-0.271968	0.221035	-0.157537	-0.23762	-0.365635	-0.29462	0.316687	-0.294222	-0.341422	-0.350239	-0.0861329	-0.0826692	-0.069159	-0.0599952	0.123022	-0.197421	-0.544683	0.171494	-0.127248	0.201062	-0.233134	0.389284	-0.0440305	-0.194828	0.136812	-0.367437	0.504953
AXL	0.185494	0.712451	0.318949	0.675516	0.115614	-0.477848	0.353245	0.0837771	0.352771	0.502088	-0.0110143	0.339022	0.636301	0.022997	0.315026	0.0497222	0.22732	0.561558	0.456158	0.449312	-0.048979	0.48163	0.418856	0.178783	0.423792	0.816518	0.329505	0.469207	0.193563	0.487022	0.74635	0.100177	-0.0602887	0.574681	0.152404	0.293813	0.213664	0.0208339	0.448568	0.596382	0.378066	-1.33158	0.121604	-1.20157	-0.466792	0.461442	-0.071125	0.634144	-0.241901
BAD	-0.227601	0.156035	-0.156219	0.134719	-0.172017	0.0625082	0.05885	0.127498	-0.0441792	0.092986	0.146651	0.0146178	-0.156674	-0.01125	-0.406991	-0.139629	0.233451	0.0146448	-0.308017	0.753296	-0.372116	-0.12133	0.478201	0.0969068	0.132129	0.364101	-0.187694	0.0148842	-0.324178	0.315989	0.0191114	0.366678	0.127438	0.279725	-0.403975	-0.0893461	0.0143169	-0.110691	-0.256878	-0.427565	-0.0211165	-0.8718	-1.13813	-0.41873	-0.839216	0.395962	-0.769808	-0.321297	0.877542
BAX	-0.399274	-0.14786	-0.904195	-1.17695	-0.90414	0.133644	-0.14606	-0.958857	-0.459479	0.604858	0.0434321	-0.299479	-0.341415	-0.15038	-0.255421	-0.388596	-0.0355445	-0.139102	0.318852	-0.225972	-0.495735	-0.430702	0.692349	-0.351408	-0.78958	0.712621	-0.67422	-0.247486	-0.110982	0.148222	0.96812	0.168127	-0.0650957	0.132293	-0.125088	-1.02633	0.0091686	-0.396519	-0.890111	-0.31454	-0.521846	-0.407432	-0.134489	-0.684546	-0.0686466	0.310513	0.13388	-0.67013	-0.696797
BBX	0.00715717	0.18129	0.145655	-0.2117	0.106864	0.121637	-0.427551	-0.154634	-0.00568738	-0.394131	0.00733647	-0.463482	0.2267	-0.276048	-0.293733	-0.3713	-0.494981	0.497708	0.101582	-0.20176	0.30385	0.16452	0.255506	-0.0897404	0.129909	0.0498359	-0.020481	-0.0607153	-0.142662	0.0341706	-0.169009	0.0698573	0.44705	-0.13707	-0.238025	0.218966	0.61224	-0.171124	0.411604	-0.261573	-0.122247	-0.72254	0.204343	0.331834	1.24091	0.206742	0.375965	0.123443	-0.50547
BCR	-0.186486	0.22381	-0.160294	0.193289	-0.162612	0.587416	0.191605	-0.636985	-0.00430407	-0.6378	-0.196995	-0.16035	0.0215519	0.0441939	-0.625731	-0.47103	0.327394	-0.201867	-0.102219	0.478899	-0.68838	-0.191462	0.0782691	0.0142351	0.277137	0.278882	-0.155256	0.0615718	-0.134979	0.205499	0.167801	0.119673	0.250485	0.189834	-0.310924	0.0888843	-0.233207	-0.563694	-0.032805	0.242677	-0.260123	0.0982025	-0.944315	-0.604026	-0.699852	0.289459	-0.351877	-0.143587	1.14571
BGN	-0.100055	-0.648645	0.413598	-0.485778	-0.898627	0.794771	0.117311	0.306831	-0.540717	1.52839	0.456188	-0.286214	-1.10694	0.357084	-0.263102	1.03893	-0.258362	-0.0020239	-0.846119	0.782544	0.479604	-0.456485	0.318879	-0.423989	-0.226234	0.705598	0.331808	-0.538922	-0.115085	-0.483818	-0.248647	-0.577304	0.824164	-0.110405	-0.837006	-0.425244	0.891873	0.46084	-0.453755	0.777302	-0.00712228	-0.977544	-1.03174	-1.50019	0.45484	0.00616592	0.155361	-0.681182	0.155003
BID	-0.301675	0.440857	0.121961	-0.752632	-0.406399	1.22865	0.256789	-0.385004	-0.431509	1.21004	-0.0928952	0.284696	-0.0418514	0.296578	0.381514	-0.189314	0.34352	-0.191902	0.0388239	-0.343738	-0.5319	-0.340361	-0.362948	0.585857	0.0838989	0.32917	0.134816	-0.140871	0.0120003	-0.295801	0.384146	-0.827756	1.01399	0.343527	0.0735272	-0.376241	-0.152363	-0.657865	0.116593	-0.29293	-0.184509	0.484794	-0.524556	0.147049	-0.0089363	0.22634	1.08209	-0.503332	-0.172595
BIK	-0.22256	-0.848033	-1.13259	-0.0606078	-0.77298	1.88953	-0.407904	0.741491	0.919077	-0.386323	-1.36357	0.0812392	-0.545913	0.680051	-1.08868	-0.834731	-0.156036	-0.428028	-0.944722	0.0158169	-0.522444	-1.13904	-0.96973	0.769503	-0.484284	-1.2359	-0.896499	-0.835416	-0.688212	-1.09888	-0.902567	-0.732944	-0.227107	-1.17278	-0.355826	1.04887	0.538912	-0.659378	-1.00057	-0.348564	-0.821086	1.51617	-1.63422	0.950214	-0.878034	-0.617357	0.583037	-0.751731	1.93403
BLK	-0.260252	-0.25318	-0.259528	0.00741827	-0.339022	0.267652	-0.0381456	1.0378	-0.147536	0.0323384	-0.149355	-0.224702	-0.103225	-0.0642011	-0.0387	0.532737	-0.135531	-0.125935	0.44185	-0.134243	0.278766	0.117033	-0.22027	1.1764	-0.242449	-0.379652	-0.378703	-0.393465	-0.08587	-0.284817	-0.288949	-0.193841	0.0635132	-0.227672	-0.182864	-0.155981	0.0339044	-0.212145	-0.239346	0.124979	-0.294122	0.322202	-0.218233	-0.284258	0.466478	0.0612129	-0.0237562	-0.276295	0.0388081
BLM	-1.21401	-0.708114	-1.03251	-0.803827	-0.426262	1.04588	-1.04802	0.583985	-1.04722	0.207546	-0.846255	-0.866496	-0.851881	1.67581	-0.969095	-1.06738	-1.05243	-1.12575	-0.249936	-0.646534	-0.988361	-0.91061	-1.62105	0.937276	-1.18066	-1.32296	-0.302674	-0.979488	-1.22247	-0.929586	-0.88334	-1.13162	1.06321	-1.49469	-1.36542	-0.785268	0.694388	-0.882916	-1.11868	-0.62344	-0.685507	1.25411	-1.03998	1.64227	0.968036	-1.14486	1.92959	-1.34097	1.05888
BMF	0.134128	-0.504036	0.0168643	-0.0717208	-0.116036	0.280178	-0.212695	0.625268	-0.427949	0.657017	0.170729	-1.04496	-0.368072	-0.582839	-0.210926	-0.208028	-0.735969	-0.665072	0.165251	-0.145623	-0.0399144	-0.817539	-0.653223	0.0494118	-0.208987	-0.377823	-0.355016	-0.617236	-1.07447	0.161297	-0.102441	-0.168223	-0.314343	-0.510856	-0.853435	-0.791989	-0.350916	-0.47682	-0.629637	-0.153623	-0.372968	0.155725	-0.530362	-0.930532	0.0420741	-0.430499	-0.89077	-0.185616	0.118151
BMX	-0.17542	0.745816	0.307375	0.0500459	0.147609	-0.722017	-0.0606445	-0.223759	0.497097	-0.473175	0.0377951	0.358187	0.319334	-0.593267	0.443945	0.517181	1.7895	0.152303	-0.16089	0.186781	0.999916	-0.194344	0.0178795	-0.511082	0.174651	0.195075	0.718124	0.56429	0.340753	-0.226837	-0.459071	-0.727037	-0.693115	-0.384425	0.852119	0.0861237	-0.672515	0.54176	0.916399	-0.0882956	0.485778	-0.507083	-0.451786	-0.827128	-0.437811	0.479108	-0.950113	-0.196528	-0.477376
BOC	-0.553737	0.411629	-0.3614	-0.414913	-0.222173	-0.105997	0.101482	0.544339	-0.0188696	1.31566	-0.22014	-0.244687	-0.182925	0.367594	0.372322	0.0648688	0.324559	-0.14029	0.183077	0.434406	0.322781	-0.35802	0.0156405	0.375106	-0.304664	0.0787178	0.347044	0.0893001	-0.5683	-0.0604679	-0.42782	-0.73679	-0.0554296	-0.178514	-0.376603	0.813417	0.450154	0.412286	1.02487	-0.339717	-0.192241	-0.554596	-0.804711	-0.122865	0.11483	0.510143	-0.269418	-0.235056	-0.00768005
BOK	0.706073	0.722321	0.77563	1.33842	0.28579	-0.229614	0.352804	0.427944	0.103324	0.756612	0.496095	0.459659	0.528684	-0.222432	0.371232	0.244897	-0.15202	0.258358	0.571216	1.30993	-0.104192	-0.083726	0.953504	-1.71746	0.747403	0.53283	0.650091	0.257437	-0.930578	1.27775	0.705898	1.08722	-0.379262	0.856419	0.0295008	-0.294827	-0.716358	0.218403	0.439251	0.667723	0.659923	-0.45408	-0.496659	-2.0237	-1.33045	0.622055	-1.52467	0.376387	-0.597126
C1D	0.516017	-0.422392	0.346574	-0.0117079	0.32153	0.48691	-0.381678	-0.0519482	-0.047869	0.825516	-0.164177	-0.283397	-0.303487	0.595034	0.238937	-0.0559574	0.0189633	-0.14148	-0.0914182	0.126873	0.275794	0.329217	0.0578402	-0.0478625	-0.134021	-0.0425825	-0.0831876	0.0422271	-0.266484	-0.106066	0.188341	-0.153101	0.004286	0.0112387	0.222939	-0.331687	0.0621431	0.254536	0.001049	-0.382398	0.436442	-0.780497	-0.268329	0.387605	-0.886821	0.0654067	-0.198397	0.358814	-0.476666
C1S	-0.0837143	-0.155657	-0.196115	-1.57562	-0.594167	-1.21301	0.895212	0.950515	-0.0326088	2.00956	0.984798	0.80316	-0.663227	-0.0530359	-0.47991	-0.179412	1.01817	-0.170033	0.575413	-1.01248	0.0504552	0.945152	0.0522995	-0.663952	-0.410255	0.265654	-0.463519	0.304223	-0.329903	-0.217568	-0.481339	-0.124498	1.7808	0.0913629	-0.992556	-0.548203	1.17451	-0.383012	-0.815618	-1.18443	-0.803607	-2.14378	-1.36692	-1.492	-1.17829	0.529373	-1.9878	-0.514746	-1.14941
C1R	-0.690476	0.0799618	0.11254	-0.502343	-0.116488	0.404137	0.24619	0.876797	-0.269933	0.797224	0.649179	0.559548	-0.0193302	0.0183485	0.402352	0.258518	0.874104	0.101798	0.286367	0.359467	0.360954	0.254426	0.406417	-0.10719	0.38312	0.160058	0.390289	0.142749	-1.49615	0.440906	0.217292	-0.189142	0.952634	-0.162385	-0.229674	-0.038598	0.650284	0.314508	0.534474	-0.810215	-0.11171	-1.78505	-1.26205	-1.34923	0.164943	1.08849	-0.914681	-0.378347	0.377781
BRE	-0.303882	0.0221499	0.21502	-0.0114343	0.0298206	0.453029	-0.0531652	0.166742	-0.0229693	0.0727131	0.115535	0.138847	-0.0944293	0.116252	-0.0901628	-0.0701879	0.0656172	-0.0152655	0.362197	0.0983125	-0.270499	-0.23695	0.195726	0.0299127	0.206542	0.0116893	0.254885	0.0569501	-0.55952	-0.138555	0.0280125	0.00676938	0.129635	-0.163171	0.0260481	-0.0914962	-0.60425	-0.175169	-0.0875008	-0.389896	0.123068	-0.466785	-0.362213	0.0791279	-0.370932	0.069897	0.512219	-0.361963	0.206784
BSG	-0.19817	-0.197058	-0.762275	0.331741	-0.599553	0.0670794	0.0451346	-0.0514366	-0.13867	0.224449	0.610363	0.0161879	-0.293623	-0.413698	-0.855358	-1.44649	0.350351	-0.318963	-0.0643722	-0.0093471	-0.909939	0.724089	-0.301273	-0.712333	-0.539418	0.578705	-0.66225	-0.443764	-0.523085	0.466388	0.285554	1.31797	0.816713	-0.40559	-0.359106	-0.737975	0.0208144	-0.87572	-0.678321	-0.472939	-0.572613	0.538584	-0.827051	-0.224696	-0.567907	-0.139262	0.136986	-0.433353	0.489578
BSN	-0.146138	0.0165088	-0.261886	0.172036	-0.365791	-0.0137117	-0.210774	0.315936	-0.117153	-0.220731	0.0261603	-0.0482561	-0.0666362	-0.145133	-0.115749	-0.057214	-0.0760727	-0.0419242	-0.378418	-0.119162	-0.0129818	-0.114803	-0.475689	-0.111338	-0.061528	-0.415167	-0.141182	-0.107674	0.00475453	-0.0794467	-0.0939827	-0.216065	-0.0859633	0.015897	-0.27406	-0.0780392	-0.11763	0.0231592	-0.152093	0.419863	0.0463724	0.328739	-0.328841	0.106034	-0.265799	-0.159617	0.249117	0.140013	0.0487436
BTC	0.690814	0.226477	0.618493	0.386718	0.499394	-0.518913	-0.257303	-0.530062	1.23936	-0.77335	0.217658	0.389978	0.610256	-0.964767	0.247596	0.534578	-0.0313917	-0.037098	0.258246	0.612693	0.774052	0.10872	0.212362	-0.947916	0.0570988	0.16093	0.800375	0.752768	-0.367495	0.139851	0.108628	0.476187	-0.643496	0.539718	-0.0585062	0.66161	-0.74851	0.628829	0.437634	0.232593	0.498116	-0.472554	0.828007	0.091255	0.228237	0.209114	-0.731371	0.371688	0.0441239
BTD	0.0952954	0.3017	0.216476	-0.0727775	0.0266866	-0.234939	0.101242	0.38827	0.183424	-0.0263678	0.361275	0.0589736	-0.188571	-0.246561	0.282507	0.180724	-0.0144044	0.0251574	0.128762	0.09901	-0.0691025	0.33977	0.0789285	0.0395239	0.276261	0.43961	0.133712	0.16532	-0.0845366	-0.0471057	0.207727	0.386228	-0.11299	0.0911256	-0.173223	-0.0367259	-0.404766	0.0171406	0.0174929	-0.339872	0.0278163	-0.822291	-0.0966763	-0.635375	-0.395947	0.15283	-0.504687	-0.081208	-0.134785
BTK	0.452325	1.14563	0.958539	0.645415	1.25242	-0.289421	0.533032	0.870942	0.751411	-0.978209	0.715802	0.804902	1.08746	-1.01467	1.27899	0.1961	0.397083	1.0748	1.48706	0.775573	-0.0929765	0.782819	0.620712	1.07151	1.26863	1.08046	1.36687	0.930667	-0.020694	0.941945	1.31221	0.430289	0.416716	0.506116	0.73035	0.532384	-0.814402	-0.0225823	1.15007	0.0571562	0.786372	-1.41034	0.930903	-1.53956	0.798524	1.00979	-1.93712	1.11162	-0.53427
C8B	0.840522	1.82072	0.786998	1.52634	0.476472	-0.838848	1.16538	0.60617	-0.145464	-0.792535	-0.385794	-0.324099	1.57499	-0.853385	1.33427	1.08565	0.64078	-0.073088	0.682998	2.01959	0.164905	2.05795	1.34701	-0.920421	2.0846	1.64183	-0.719239	1.03712	0.0254338	1.10016	0.945842	-0.519387	-0.887953	-0.335018	0.633068	-0.353292	-0.434944	0.1949	-0.868829	0.78443	1.64729	-0.308387	-0.402671	-0.562471	-0.558069	1.19453	-0.373098	0.471889	-1.01785
C8A	-0.137402	0.023785	-0.241287	0.0797496	-0.391326	-0.011853	0.249834	0.0564597	-0.389947	-0.179965	-0.0817835	0.228314	-0.0847679	-0.284163	0.163743	0.130576	0.0799065	-0.156294	-0.0252181	-0.137911	-0.263722	-0.21267	0.2221	-0.233516	0.348527	-0.011853	-0.382534	-0.121117	0.264142	0.0173852	0.730822	0.0547915	-0.0928747	0.0771368	0.299312	-0.210655	0.0328525	-0.212358	-0.467556	0.203285	-0.0584038	0.0569946	-0.279365	-0.261029	0.0523406	-0.0589539	-0.0607513	-0.182862	0.493454
C8G	-0.0850734	-0.00260078	-0.280817	-0.0360698	-0.102864	0.21048	-0.0851071	0.239053	-0.0226658	0.10137	0.549753	0.152578	-0.081262	0.146285	-0.131962	-0.0177506	0.246148	0.425545	-0.270591	0.0185572	-0.150343	0.0622802	0.00164198	0.295278	-0.25106	0.0530874	-0.242122	-0.132852	-0.0714247	0.0518534	0.345996	-0.181071	-0.0825073	-0.453303	0.453541	-0.138322	0.00889079	-0.113951	-0.169283	-0.224634	-0.361371	0.418128	0.0783488	-0.189414	-0.0281895	0.143826	0.366429	0.0701594	-0.201364
CA1	0.253344	-0.274608	0.0405677	-0.065374	-0.298219	0.262989	0.0469379	0.255373	-0.361854	0.0436252	0.20218	0.53907	-0.403354	-0.147429	0.106964	-0.00409154	-0.10887	-0.00831781	0.107461	-0.00907931	0.321333	-0.112145	0.182543	-0.191751	-0.0644503	-0.170312	-0.278539	-0.244977	0.104515	0.0546838	0.0865477	-0.0870539	-0.18515	0.0395734	0.497926	0.0514314	-0.270705	-0.0267374	-0.270903	0.184184	0.222306	-0.0123095	0.0637346	-0.0646172	-0.144806	0.179051	0.130463	-0.125857	-0.0693467
CA3	0.487181	2.55238	1.27499	0.931042	1.13616	-0.854487	0.636716	1.29989	-0.782565	-0.89166	-0.412501	1.80331	-0.271263	-1.01745	0.0488996	3.07591	0.36959	0.353535	-0.0922288	0.416906	2.39406	3.01512	1.06897	-0.757668	1.02059	-0.504925	1.20501	0.257364	-0.668393	-0.485198	1.68034	0.582371	-0.982403	0.0794418	1.44367	0.768625	-0.686237	1.76448	0.794602	-0.761908	0.74442	-0.783922	-0.538345	-1.04623	-0.605447	1.13531	-0.926991	-0.156709	-0.966025
CA2	0.280228	0.91236	0.85222	0.0529753	1.62162	-0.100331	1.40414	-2.15098	0.50703	1.40281	2.34935	0.881014	0.601137	-1.52903	0.854817	1.15064	0.284878	1.24503	1.61383	0.934389	0.128191	2.05563	1.6931	-0.666675	1.56335	1.68228	1.0203	1.51395	1.6801	0.836669	1.40447	1.32721	1.10995	0.973559	0.600065	0.0436301	-0.141489	1.38772	1.25471	0.635415	1.5115	-2.32472	1.10683	0.634079	-0.881529	1.01552	-0.748406	1.63497	-2.41793
CA4	1.41911	2.78498	1.11841	2.5909	1.81787	-1.79748	1.44385	-1.1985	1.62012	-2.0792	1.45207	1.68809	2.36493	-2.07295	1.76132	1.07389	1.46821	2.55088	1.94672	2.16169	1.79863	2.83507	3.10466	-1.93873	2.30836	2.36282	1.31676	2.56531	3.52206	2.55544	1.96508	2.44096	-1.67336	1.54053	2.06534	0.662616	-1.70997	1.83605	1.71177	2.11771	2.48969	-1.74083	2.01611	-1.99332	-1.2249	1.88918	-1.54619	2.13241	-1.84743
CA7	0.0799662	-0.366791	-0.008411	0.0533199	-0.435643	-0.0143472	-0.0533231	0.424844	0.00281427	0.0719118	-0.367727	-0.148189	-0.256116	-0.198161	0.212125	-0.117443	-0.0606733	-0.10056	-0.331185	-0.0422848	0.443415	0.141648	-0.268732	-0.147367	-0.338164	-0.390124	-0.248101	-0.139654	0.444534	-0.461161	-0.240774	0.0222602	-0.237995	-0.268579	-0.177458	-0.224028	0.495293	0.101614	-0.462695	0.271734	-0.255883	0.169529	-0.158278	-0.163374	0.366975	-0.310876	0.307449	-0.0149669	-0.280169
CA6	0.0138888	-0.199975	-0.196596	0.217182	-0.286472	-0.0238001	-0.120107	0.159313	-0.156753	-0.0352662	-0.136729	-0.200292	-0.0691793	0.080511	-0.0206853	-0.0177857	-0.128077	-0.115493	-0.0400416	-0.093255	-0.220686	-0.0815117	-0.0788975	0.116669	-0.282131	-0.178755	-0.285593	-0.139439	0.0347185	-0.080887	0.0635123	-0.144993	-0.041997	-0.1806	0.137276	-0.037414	0.136039	0.246898	-0.314164	0.146039	-0.170264	0.208668	0.0732611	-0.0712661	0.0292567	-0.042313	0.39769	-0.335461	-0.0726771
CA9	-0.873358	-0.585228	-0.791649	-0.375916	-0.943027	-0.298298	-0.374625	-0.112482	-0.782629	0.410282	-0.775061	-0.672221	-0.656442	0.255202	-0.584311	-0.593227	-0.371648	-0.580746	-0.903426	-0.571618	-0.830874	-0.527746	-1.18305	0.427366	-0.557359	-1.11931	-0.77619	-0.839369	-0.327433	-0.589685	-1.04357	-0.699606	1.34466	-0.646913	-0.711611	-0.545968	-0.381092	-0.330196	-0.768311	-0.161049	-0.77834	0.815782	-0.61091	-0.148173	0.0281392	-1.08003	1.27733	-0.590355	-0.136112
CA8	-0.0514052	-0.103506	-0.0736066	-0.0679894	-0.0943209	-0.105298	0.639339	0.408557	-0.00997187	-0.357798	-0.0561626	0.448119	-0.284823	0.761415	-0.134444	-0.180532	0.232943	0.118469	0.173745	-0.197775	0.259276	-0.00532359	0.0587465	-0.30014	-0.0674074	-0.410599	-0.13556	-0.149634	-0.061563	-0.0331419	0.00723808	-0.0392306	-0.345516	0.0235134	0.073662	-0.0176024	-0.295737	-0.0777147	-0.0631188	-0.0436894	0.0534172	-0.146387	-0.211725	-0.237455	0.0734833	-0.000345	-0.442633	-0.144072	-0.0825189
CAD	-0.615737	-0.595803	-0.38069	-0.40493	-0.592979	0.254404	-0.52151	0.0304067	-0.528498	0.39391	-0.332196	-0.453667	-0.413918	0.320045	-0.39603	-0.329408	-0.368045	-0.453333	-0.434895	-0.115952	-0.327405	-0.314422	-0.402028	0.3024	-0.223769	-0.350428	-0.458133	-0.43199	-0.528804	-0.0891661	-0.428494	-0.314242	0.162279	-0.171774	-0.387215	-0.787715	0.270844	-0.591313	-0.405376	-0.479427	-0.36327	0.264602	-0.677311	-0.0846274	-0.390201	-0.410139	0.88148	-0.251685	0.534476
CAT	0.222107	1.08883	0.875943	0.86213	1.39308	-1.07316	0.898858	0.172823	1.12357	-1.36434	1.07624	1.07763	1.04726	0.0626648	1.13799	0.530259	0.499257	1.05115	1.20825	0.505586	-0.139708	0.679427	0.892919	-0.573024	0.970089	0.865003	1.20348	1.25195	0.230811	0.907691	0.783588	1.11857	-0.428828	0.911628	-0.038706	0.530672	-0.345358	1.04824	0.924154	0.841499	0.510615	-0.803734	0.980157	-1.20181	-0.503102	1.01542	-2.16775	0.964856	-1.31974
CBL	0.0747887	-0.1447	-0.208303	0.0372758	-0.174252	-0.14447	0.0363623	0.0329963	-0.201936	0.107982	0.110747	-0.331417	0.325328	-0.0753496	0.193345	-0.258845	-0.159292	0.0781319	0.504162	-0.0732335	-0.104916	0.130994	0.128576	0.402788	0.241445	0.537485	-0.411428	-0.148749	0.439575	-0.0858672	0.233684	0.221255	-0.155814	-0.069	-0.122875	-0.159976	0.0765297	-0.0662458	0.0737938	0.115497	-0.0771707	0.128924	0.273409	-0.0467762	-0.0119321	0.315096	0.321768	0.0262891	0.458309
CBS	-0.62071	0.0368037	-0.185798	-0.0609371	0.219825	2.00395	-0.276119	-0.4055	-0.550108	-0.0197258	0.13494	0.0894088	-0.831118	1.20448	-0.412263	0.0763296	-0.90829	-0.314952	-0.614069	-0.195483	-0.205531	0.362529	-0.164845	-0.508235	-0.331908	-0.10636	-0.995775	-0.716384	-0.739812	-0.127823	0.00562637	-0.163054	0.00269447	-0.376184	0.201226	-0.599965	-1.08173	0.147829	-0.307103	-0.441199	0.181027	0.300917	-0.363131	-0.628388	0.265608	-0.275034	1.70837	0.257001	0.671172
CCK	0.0994586	0.919393	-0.451474	0.731019	0.0476734	0.0852424	-0.113306	-0.185383	-0.482897	-0.37817	-0.413246	1.92217	0.76415	-0.245288	-0.467871	-0.494117	1.40019	0.589924	0.40469	-0.196077	1.27045	1.54582	0.570184	-0.283858	-0.0915897	0.299155	-0.435637	0.291865	0.394415	0.989217	0.843227	-0.103499	-0.247058	-0.0903799	0.680056	-0.308202	-0.435859	0.0302425	0.440592	0.0213469	0.0018012	-0.200895	-0.243774	-0.647985	-0.426572	0.427415	-0.0230716	0.466265	-0.349858
CD2	0.121395	-0.00562437	0.910051	-0.210633	-0.0959639	-1.06361	0.372084	1.80486	-0.167818	-0.996055	-0.166908	-0.0278649	-0.240984	-1.05094	1.11856	-0.0583224	-0.0578942	0.129165	1.81282	1.03348	-0.239755	-0.535546	-0.205637	1.65113	0.761953	-0.971469	0.264019	0.62304	0.00805647	-0.072713	-0.78481	-1.21289	1.12083	0.445469	-0.981372	0.715237	-0.307855	-0.308297	0.518296	-0.359789	-0.629751	-1.0435	-1.94579	-2.54294	0.820602	0.634879	-1.69242	-0.616819	0.931179
CD4	0.070281	-0.0757589	0.0702707	0.268416	-0.189762	-0.140903	0.176873	0.640871	-0.0616822	0.0766925	-0.00535262	0.172416	-0.152897	-0.805004	0.175237	0.141092	0.227459	0.312934	0.313308	0.663415	0.113447	0.0501251	-0.0456092	0.251282	0.0775154	0.342882	0.0335824	0.174766	-0.186951	0.370787	0.405554	0.254242	0.306437	0.260097	-0.00950864	0.00967999	-0.186954	-0.167478	-0.0685033	0.226826	0.21493	-0.442434	-0.641204	-1.29475	-0.324343	0.229262	-0.18542	-0.274144	0.12878
CCS	-0.368648	-0.128303	-0.310589	-0.0931338	-0.0426709	0.524325	-0.235022	0.124475	-0.516993	-0.0103009	-0.138892	0.016086	-0.569288	-0.0757755	0.0830773	-0.214302	0.0833518	-0.402338	-0.0093697	0.538155	-0.286507	-0.150154	0.3838	0.180864	0.149885	0.0404813	0.24796	-0.0923709	-0.900283	0.156422	0.0756496	-0.268038	-0.142659	-0.0893695	-0.104265	-0.54561	-0.588579	0.015873	-0.191099	-0.398252	0.0887982	0.0593958	-1.15518	-0.570564	-0.34773	0.19949	-0.602829	-0.72053	0.778704
CD6	0.0350933	-0.214294	-0.0631326	0.00283776	-0.357007	-0.172021	0.190142	0.442075	-0.279798	0.103912	-0.0719761	-0.202894	-0.14521	-0.238141	-0.14886	-0.00047	-0.158545	-0.0095093	0.133981	-0.0171616	0.0183181	-0.205827	-0.125843	0.222453	-0.094471	-0.147863	-0.301426	-0.273634	0.21358	-0.0301973	-0.149586	-0.120773	0.165466	0.158096	-0.309315	0.132315	0.0859371	-0.106893	-0.186603	0.33921	-0.0820047	0.24233	-0.0849682	-0.18894	0.219726	-0.0583435	0.0459287	-0.286263	0.477851
CD5	-0.180924	-0.117928	-0.19507	-0.0394558	-0.355269	0.0478903	-0.104451	0.85446	-0.226027	-0.177475	-0.240946	-0.0144326	-0.408268	-0.384291	0.31422	-0.0945278	0.156379	-0.145286	0.631094	0.582345	-0.34731	-0.400702	-0.2969	0.60105	0.19783	-0.350282	-0.375596	-0.22119	-0.185332	-0.408252	-0.180937	-0.515012	0.11361	0.0295866	-0.348999	0.241153	-0.0382244	-0.469792	-0.223283	-0.0500002	-0.483642	0.436373	-0.766797	-0.525648	-0.106644	0.0694823	0.342437	-0.453902	0.688439
CD7	-0.491505	-0.598343	-0.431989	0.16926	-1.04207	-0.137473	0.0188972	0.876184	-0.616343	-0.203697	-0.475077	0.154612	-0.416686	-0.555116	-0.0705249	-0.599218	0.572606	-0.130751	-0.32951	0.205536	-0.20255	-0.207542	-0.0928985	0.524668	-0.220139	-0.192534	-0.629579	-0.252839	0.551522	0.324048	-0.097021	-0.129201	0.736022	-0.108989	-0.202452	-0.092119	-0.0586132	0.00519761	-0.785187	0.0960327	-0.461866	0.00293132	-0.626904	-0.746951	-0.0268227	-0.274357	0.102059	-0.722023	1.06824
CD9	-0.192474	0.712695	-0.297223	0.679657	0.686935	0.848906	0.231614	-0.900543	0.934776	0.0460754	0.880899	0.577614	0.567601	0.838021	-0.162139	-0.0183164	-0.0308684	0.565822	-0.341274	-0.0362609	0.282783	-0.140198	0.303451	0.826757	0.255899	0.759049	0.0595394	0.661873	-0.105151	-0.163321	-0.273633	0.650478	0.475129	-0.33487	0.267959	0.479811	0.654341	-0.215445	-0.281259	-0.0460487	-0.158532	0.558551	0.0229985	1.37587	-0.481644	0.258906	0.49547	-0.0499727	0.669423
CDA	-0.738982	0.445004	-0.71755	-0.0132665	-0.92613	-0.666324	-0.310085	-0.242758	-0.818182	0.266168	0.229967	1.16206	-0.973142	-0.392939	-0.320386	-0.43579	0.907643	-0.138884	-0.230091	-0.530209	-0.516609	-0.607769	0.253879	-0.634357	-1.00106	-0.511289	-0.384068	-0.254856	1.07289	-0.933423	-0.322833	0.0743345	-0.641063	-0.379756	-0.293973	-0.569343	-0.388802	-0.350575	-0.832556	0.324926	-0.409432	-0.422978	-1.35144	-0.302954	-0.91787	-0.158656	-0.357071	-0.99437	0.968526
CEL	0.0382304	-0.447692	-0.436383	-0.373881	-0.717022	4.87482	-0.252693	-0.258317	-0.203323	2.60045	-0.569274	-0.675143	-0.53452	0.173098	-0.277861	-0.521968	-0.188882	-0.366595	-0.483441	-0.420808	-0.456194	-0.336707	-0.344026	-0.284428	-0.439587	-0.4318	-0.528427	-0.661041	-0.388012	-0.417898	-0.543551	-0.388345	0.270036	-0.265694	-0.402242	0.209271	0.00181439	-0.268325	-0.597164	0.100169	-0.212369	0.0883662	-0.515377	0.475733	-0.398287	-0.604446	0.117969	-0.499253	-0.0624063
CFB	-0.160933	-0.692445	-0.273319	-0.206233	-0.400522	-0.476706	-0.766259	0.397082	0.63498	0.232464	-0.0529969	0.460843	-0.242096	-0.342381	0.21352	-0.192328	0.126833	-0.20349	-0.151986	-0.18732	-0.781383	-0.692127	-0.552188	-0.292744	0.156329	-0.950734	0.0927333	0.0308692	-0.830957	0.0126113	-0.572101	-0.155838	0.947747	-0.18227	-0.153467	0.123142	0.409659	-0.148439	0.392549	-0.446567	-0.592241	-0.365329	-0.0468761	-0.12959	0.397005	-0.293533	-0.445083	-0.414812	0.522789
CFD	1.45213	1.73117	2.01507	1.91739	1.31235	0.0890185	0.877114	0.88451	1.38814	-2.58407	0.232708	2.09754	1.33419	-0.970397	2.40996	1.15655	1.76266	1.49556	1.30088	2.38075	1.9806	1.93248	1.92123	1.0529	1.88251	1.65401	1.78897	1.38027	0.796866	1.10537	1.84126	1.39138	-0.820739	1.88433	1.87212	2.05051	-0.682096	2.0884	1.66433	0.337994	1.96596	-2.29885	-1.41327	-2.60384	-0.393654	2.40005	-1.66418	1.36866	-0.635253
CFH	0.17625	1.31172	0.95904	0.284685	0.763115	-0.681251	0.571315	-0.0641005	1.29479	-0.696038	-0.347921	0.18341	0.663706	0.487169	1.20576	0.952919	1.44926	0.465017	0.238224	1.52048	0.324926	0.418049	0.63322	-0.424048	0.145909	0.790891	1.73901	1.57298	-0.392718	0.767375	-0.00110569	-0.792035	-0.0672379	1.10798	0.141721	1.52383	-0.14506	1.82517	1.71585	-0.1011	0.371872	0.638431	-1.00408	-1.74672	0.198532	2.0164	-2.25667	0.260174	-0.171285
CFI	0.161683	0.491627	0.581792	-0.364876	1.00965	-1.22216	0.821245	0.897795	0.908229	0.246961	1.50406	0.734336	0.858562	-1.57224	0.45221	0.733786	0.760873	0.772711	0.840699	-0.239578	-0.0644558	0.772008	0.505314	-2.24382	0.397514	0.473672	1.68951	0.914887	-1.26933	0.550175	0.0945808	0.5627	0.762866	0.67288	-0.229529	-0.515668	-0.702239	-0.225522	1.05096	-0.731221	0.384434	-3.36245	0.854213	-2.18922	-0.580926	0.84018	-2.14678	0.828927	-2.84249
CFP	0.300642	1.43035	0.219771	1.05617	0.197175	-0.53038	0.0984416	0.406143	-0.0892105	-0.816799	-0.019176	1.61424	0.781024	-0.651475	1.48619	-0.0538252	1.97556	0.207202	0.960696	0.6233	0.987181	-0.0223156	1.31375	0.903927	0.591486	0.335389	0.944875	0.711405	0.846869	1.06951	1.72469	0.1059	-0.250314	1.10007	0.712285	0.402579	-0.535415	0.421654	0.560593	0.559185	0.232655	-0.70795	-0.83801	-1.00973	-0.82947	0.976903	-0.462855	-0.322151	-0.103481
CGA	-0.317962	-0.164803	-0.382328	-0.100741	-0.535501	-0.148184	-0.213955	-0.0811373	-0.22768	-0.487071	-0.334232	-0.295254	-0.355559	-0.274361	-0.241582	-0.0577792	-0.177891	-0.181113	-0.435556	-0.359292	-0.0132085	-0.617689	-0.409054	-0.241737	-0.219436	-0.264627	-0.543662	-0.360087	-0.196176	-0.341289	-0.307691	-0.264172	-0.476177	-0.323645	-0.31945	-0.283332	-0.007668	-0.247029	-0.319463	-0.216338	-0.211438	0.088467	0.00916157	-0.359023	-0.113173	-0.391559	-0.00647035	-0.35132	-0.133434
CGN	0.202657	0.884294	0.26709	0.984014	0.638003	0.106429	0.204356	-1.41398	0.847342	-2.16879	0.35705	1.05448	1.12086	-2.15357	0.307609	-0.0689887	0.488353	0.999822	0.300368	1.42314	0.455686	1.54499	1.39975	-2.38733	1.14504	1.12312	-0.146487	0.875003	0.419951	0.542875	1.0195	0.979279	-0.496891	0.215214	0.709119	0.844974	-2.87126	0.121192	0.439012	1.11683	0.666167	-1.83303	0.503383	-1.64658	-1.25229	1.44685	-1.62894	0.910245	-1.30312
AMIGO3 /// GMPPB	-0.152275	0.160295	0.0463046	0.0550714	-0.364267	0.0380334	0.038519	0.45031	-0.305422	-0.000446	-0.557241	0.0107317	-0.330674	-0.238714	0.185204	-0.255312	0.498374	-0.0688774	0.139928	0.27577	-0.32644	-0.129067	-0.243392	0.112589	-0.0449207	-0.0777425	-0.349703	-0.174396	0.00236543	0.117063	-0.204549	0.146	-0.115221	-0.0663863	-0.098304	0.00984247	0.0337227	-0.127548	-0.41074	0.11816	-0.273897	0.099352	-0.306297	-0.491953	-0.051831	0.0138835	0.0856201	-0.242712	0.384258
CHM	-0.0424974	-0.0281947	-0.0755035	-0.147893	-0.0265724	-0.260687	-0.193395	-0.22592	-0.0618211	0.0689947	0.256032	0.0362089	0.0211231	0.255346	0.0800252	0.199184	0.0595916	0.009641	0.229863	0.0780433	0.0310325	0.090984	0.0794723	-0.227464	0.109326	0.270975	0.0208287	-0.0482966	0.0264454	0.0979303	0.184102	-0.103636	0.317585	0.00638564	-0.243254	-0.100055	-0.0796515	-0.073785	0.134469	-0.349056	0.0308766	-0.226873	0.017772	0.0646452	-0.438497	0.171654	-0.0891257	-0.0161434	-0.613724
CIC	-0.0735248	0.217329	-0.101832	-0.044138	-0.284349	0.363933	0.00625608	0.297164	-0.282621	0.566541	-0.198965	0.0109761	-0.174937	0.300416	0.0560499	0.0471831	0.253764	0.128913	-0.304635	0.0931082	0.123599	-0.0646923	0.0660497	0.126219	0.186426	-0.082877	-0.340295	-0.186612	0.243248	0.242057	0.327145	0.0370938	0.0655718	0.00201091	0.035044	0.0330565	-0.18725	-0.0942146	-0.168864	0.274727	-0.0707714	-0.271217	-0.517868	-0.179599	-0.164358	0.00204733	0.0765783	-0.224145	0.261956
CKB	0.450125	0.321307	0.322566	0.502688	-0.0275683	-0.78123	0.204432	-1.38501	0.950415	-0.0544711	0.377042	0.33061	0.132601	-0.76413	0.0118883	0.74757	0.290639	0.177922	0.0985529	1.19513	0.203254	0.0999736	0.936245	-1.8384	0.481436	0.455494	0.469166	0.686534	0.136838	0.840185	0.368403	0.153141	-0.660284	0.392459	0.262854	0.410247	-1.85431	0.473509	0.297604	0.33814	0.630601	-0.420154	-0.699514	-1.61607	-1.57171	0.797643	-0.0317484	0.256709	-0.313749
CKM	-0.111222	-0.255428	0.0973176	0.0135617	-0.403254	-0.156317	-0.154809	0.141828	-0.414232	-0.109629	-0.147832	-0.237827	-0.192695	-0.264038	-0.0609832	-0.14842	-0.0862345	-0.129911	-0.180016	-0.165827	-0.164955	-0.0469997	-0.294074	-0.0527218	-0.0466518	-0.118899	-0.648587	-0.307996	-0.206542	-0.239514	-0.141132	-0.252199	0.0495093	-0.194091	-0.260908	-0.308559	-0.52391	-0.586912	-0.54638	-0.0594745	-0.104216	0.144244	-0.335662	-0.522852	-0.0977947	-0.189022	0.286906	-0.437134	0.217366
CLC	-1.69483	0.860731	1.03264	0.698823	2.42517	-0.501089	1.06096	2.02289	-1.41736	-1.41957	0.785029	1.03816	-1.20612	-1.00079	1.61402	0.954531	3.13154	0.1797	3.55963	-1.12046	-0.744983	-1.60948	3.10103	0.548407	-0.472676	1.16865	-0.877248	1.13575	-0.771657	-1.84734	-0.794417	-1.33257	0.789422	-1.05806	1.03796	-1.43394	1.56045	1.44205	-0.599896	-1.42059	-2.05027	-1.45727	-1.69459	-1.66675	-1.27776	-1.31423	-1.53169	-1.69887	-1.32285
CLU	0.284691	0.72603	0.590589	0.313743	0.649919	0.100047	1.19673	1.61078	1.65474	-1.17034	-0.215031	1.00741	0.462131	0.609313	0.748508	1.09953	1.62048	0.611817	0.798116	1.3394	0.942476	0.186892	0.662074	-0.399538	0.970529	0.370805	0.711815	1.31817	0.451554	0.497952	0.335323	0.0140506	0.837188	1.42158	0.509288	2.12365	-1.32114	1.73099	0.482145	0.827732	0.154153	-0.695353	-0.720138	-0.689115	-0.228833	1.71095	-1.98571	-0.196434	0.453401
CNP	-0.538713	0.128349	-0.0845549	-0.124244	-0.204494	0.110355	-0.0242948	0.233319	-0.249252	0.434073	-0.245849	-0.103822	-0.122115	-0.00757463	-0.00811744	0.00298782	-0.207719	-0.19862	-0.28982	0.272739	-0.519568	-0.243357	-0.198652	0.348293	-0.154953	-0.328319	0.0506321	-0.362287	0.0686266	-0.3239	-0.355129	-0.316474	-0.151921	-0.0693975	-0.377632	-0.157901	0.0408808	-0.0826662	-0.222279	0.200754	-0.0780464	0.41731	-0.490729	0.0896558	-0.160042	-0.376108	0.229964	-0.209413	0.593599
CPD	-0.336096	-0.396104	-0.309313	-0.533395	-0.337615	-0.380907	-0.0115473	-0.386116	-0.0222292	-0.12376	0.124971	-0.14402	-0.469725	0.581147	-0.28532	-0.494308	0.10989	-0.482724	-0.320028	-0.865964	-0.466393	-0.407109	-0.188695	-0.583269	-0.55462	-0.377496	-0.096436	-0.408808	-0.204397	-0.917023	-0.45953	-0.493808	0.224846	-0.234599	-0.103961	-0.21398	0.0154619	-0.289407	-0.276679	-0.938061	-0.352181	-1.70042	-0.348207	0.56183	-0.234197	-0.576105	-0.84063	-0.32609	-1.17574
CPE	-0.959817	-0.101365	0.060173	-0.815267	-0.0864394	-1.76051	0.377152	-1.3038	-0.100358	0.943955	-0.993014	-0.257837	-0.670213	-0.458973	0.0458314	0.286671	-0.28611	-0.281027	-0.762514	-0.922221	0.235715	0.398902	-0.303579	-0.866979	-0.19508	-0.110252	0.277993	-0.252444	-0.412684	-0.834089	-0.396788	-1.06234	-1.82609	-0.136169	-0.792719	0.0472969	0.607918	1.65464	0.658651	-1.06868	-0.0796135	-1.94307	-1.04432	-1.67757	-1.31612	-0.135136	-3.26268	-0.123692	-1.16786
CPM	0.700289	0.400794	0.758021	0.64213	0.733858	-1.05875	0.456273	-0.117786	0.271652	-1.20627	0.934657	0.521228	0.954089	-2.62722	1.00256	0.287557	0.0850963	1.25969	0.433029	1.12267	0.397742	1.61111	1.0337	0.831569	0.744732	1.10946	1.11601	1.252	0.339682	1.31817	0.843596	2.03717	-1.24173	0.950075	0.631995	0.387779	-2.18333	0.594544	1.15687	1.25849	1.28862	-3.01443	1.77621	-2.43416	0.38762	1.08337	-2.31597	1.25574	-0.886639
CPO	-0.222126	0.116139	-0.284207	0.0764114	-0.0184459	0.0142541	-0.19889	-0.0503472	-0.19038	-0.00476725	-0.0118098	-0.15768	-0.301988	-0.180086	0.106831	-0.00981548	-0.257279	-0.226389	-0.175606	-0.219479	0.0255968	0.0997877	-0.108465	-0.179108	-0.111129	-0.282984	0.0533623	-0.259858	0.214648	0.0481178	0.0451061	-0.224377	-0.148033	-0.0854388	-0.0632891	0.214523	0.0744158	0.0695854	0.0130047	0.121789	0.22831	0.0270635	-0.0685368	0.319899	0.2395	0.1297	0.0992958	0.0296847	-0.28015
CPQ	0.257379	0.958782	0.985635	0.148989	0.773657	-1.06235	0.988949	0.223254	0.598104	0.681824	1.0865	0.772753	0.362126	-0.127287	0.433793	0.702416	0.499146	0.775227	0.607737	0.232682	0.0966885	0.406655	0.639873	0.551853	0.504618	0.603547	0.87084	0.829644	0.675284	-0.164674	0.274538	0.333923	-0.0616011	0.9228	0.182348	0.333504	0.251305	1.01627	0.635823	0.520647	0.335615	-2.2662	0.364823	-1.96859	-0.343424	0.549943	-1.40508	0.386625	-0.916847
CR2	-0.320213	-0.252236	-0.422572	-0.330996	0.425956	-0.159035	-0.0709602	2.53985	-0.377278	0.0142434	-0.282319	-0.547832	-0.467429	-0.198929	-0.286989	1.81907	-0.130896	-0.405994	0.0990618	-0.373931	-0.074201	-0.25906	-0.344845	0.923045	-0.42144	-0.258288	-0.269398	-0.437878	-0.355717	-0.46627	-0.420143	-0.539024	0.986203	-0.508789	-0.0931326	-0.294389	-0.366395	-0.450145	0.0382007	-0.0610142	-0.0987711	1.43784	-0.475555	-0.468464	0.203082	-0.329054	0.0724065	-0.104155	-0.345872
CR1	-0.0363648	-0.109832	-0.140043	0.0319796	0.388513	0.190106	-0.0428287	0.692528	-0.0939687	-0.302301	0.0746487	0.295562	-0.723555	-0.537503	0.184049	0.0100131	0.697701	-0.0645442	0.193115	-0.387117	0.0204171	0.0204229	0.0834508	0.113071	-0.0581724	-0.0725369	-0.0887285	-0.0867893	0.211205	-0.207222	0.418383	0.088687	0.428995	-0.284088	0.0449674	-0.326625	-0.0344209	-0.146132	-0.043347	-0.414206	-0.165904	-0.186307	-0.227438	-0.693307	-0.269549	-0.0642172	-0.272279	-0.405092	-0.0475977
CRH	-0.229199	-0.181047	0.00190255	-0.016618	-0.301287	0.161294	-0.0609014	0.100061	-0.300724	-0.0252062	-0.118466	-0.228406	0.152261	-0.279823	-0.133592	0.0782573	0.687076	0.0205856	0.525348	-0.0811244	0.0378693	-0.112508	0.210137	-0.0358636	-0.125792	-0.0090175	-0.214546	-0.164639	0.032684	-0.107783	-0.0325625	-0.0834543	-0.162311	-0.147451	0.800394	-0.0527398	0.197902	-0.131565	-0.350922	0.182498	0.00377862	0.393329	-0.0306261	-0.0753268	0.44556	0.0610953	0.276207	-0.201297	0.335274
CRK	0.0432835	0.399487	0.463965	0.27757	-0.180772	-0.281089	0.608605	-0.373889	-0.0397744	-0.167016	0.546351	0.260047	0.194498	0.284758	0.213665	0.167086	0.632435	1.02736	0.169456	0.254183	-0.359049	0.54508	0.586068	-1.00537	-0.0163276	0.363024	0.103496	0.00956027	1.0358	0.15747	0.424548	0.578784	-0.71683	0.703844	0.195511	0.325265	-0.364385	0.269729	-0.133839	0.541437	-0.0297451	0.208127	0.289887	-0.124877	0.0200776	0.591738	-0.735095	0.236861	-0.666433
CRP	-0.0237529	-0.0219334	-0.103019	0.0380069	-0.108368	0.161065	-0.00110897	0.16693	-0.0913858	0.0420177	0.00753541	0.0716166	-0.11569	-0.166349	0.0256534	0.000420646	-0.0990593	0.0108533	-0.182181	-0.0723104	-0.105701	-0.138598	-0.0689223	0.075259	-0.0211344	-0.0169937	-0.254129	-0.0511023	0.226024	0.00734961	0.0199284	-0.0359054	-0.0396979	0.0872983	0.0385981	-0.0108263	0.204896	0.0383956	-0.173437	0.000697719	0.051871	0.103366	-0.0217809	-0.120168	0.137052	-0.00122847	0.249812	-0.0460963	0.450561
CRX	-0.176958	-0.102583	-0.229026	0.204382	-0.316818	-0.0816603	0.0164952	0.516582	-0.284435	0.0982311	0.0555478	-0.125754	-0.0178267	-0.354294	0.0462953	-0.0204009	-0.0527069	0.0296528	-0.246725	-0.103264	-0.250831	0.0121595	0.0783474	-0.170339	-0.100974	-0.176459	-0.233277	-0.152416	0.296381	-0.0183807	-0.0622465	0.0165705	0.0191554	0.144872	-0.195534	-0.115517	0.125152	-0.0750685	-0.257243	0.335122	-0.213984	0.369963	-0.0251774	-0.191259	0.00316846	-0.0789312	0.364137	-0.0278226	0.286638
CSK	-0.378841	-0.00503322	-0.602208	-0.127971	-0.170957	0.676138	-0.322576	0.282816	-0.334111	-0.351546	-0.394514	-0.297881	-0.076442	-0.238535	0.389391	-0.310557	-0.0327294	-0.0908844	0.143574	0.357759	-0.620616	-0.360937	-0.161812	1.32285	0.270481	-0.0558478	0.101277	-0.21899	0.0266446	0.19486	0.518836	0.0235767	0.923951	0.00455919	-0.10015	-0.179478	-0.0101245	-0.39449	-0.122588	0.0351779	-0.164465	0.861944	-0.403537	-0.0458699	-0.0365606	-0.025764	-0.00169172	-0.578571	0.834787
CTH	-0.405969	0.517801	-0.204289	-0.113652	0.722336	-0.517944	-0.834017	0.138584	0.00978426	-0.46904	0.314445	0.101007	-0.471186	-0.240286	-0.275136	0.171588	1.0881	-0.30952	-0.0134282	-0.209877	-0.471907	1.17477	-0.125779	-0.705673	-0.109308	-0.244743	0.376603	-0.0730845	-0.247833	-0.63505	-0.231259	0.363704	-0.5291	-0.521943	0.00603811	-0.108402	-0.503181	-0.234614	0.353282	-0.916376	-0.355492	-0.879831	-0.361596	0.411461	-0.0441192	-0.235046	-0.639256	-0.0960353	-0.00477996
DAK	-0.298248	-0.166921	-0.10368	-0.230345	-0.318424	-0.268494	-0.256517	0.234479	0.0995436	-0.092234	0.0425945	0.0158228	-0.263575	-0.197611	-0.082464	-0.114996	-0.0745405	-0.151524	0.0892815	0.0784331	0.11855	-0.0830487	-0.0551265	-0.132345	-0.0975088	0.234573	-0.232319	-0.0308591	-0.122707	0.107487	-0.294029	0.0309186	-0.117857	-0.0713685	-0.203175	-0.220315	-0.400188	-0.0668863	-0.375709	0.153587	-0.120151	0.448501	-0.627111	-0.0532522	-0.279467	-0.00997416	-0.326612	-0.201483	0.390008
OR2I1P /// OR2I1P	-0.199423	-0.130925	0.0571036	-0.134918	-0.0211234	-0.0777867	0.197241	0.170918	0.0651147	-0.0365	-0.191144	-0.189467	-0.0634666	0.0996229	-0.028273	-0.0811021	-0.166889	-0.166181	-0.41883	-0.0726636	-0.194545	-0.151549	-0.172815	0.105933	0.070455	-0.164957	-0.281743	-0.404911	-0.0697584	0.0542771	-0.253696	-0.237421	-0.112999	-0.227215	-0.203403	0.12566	-0.153389	-0.196265	-0.0745853	-0.0128579	0.102284	0.022504	-0.0561253	0.00434125	-0.081063	-0.416266	0.0916325	-0.0946978	0.646196
DAP	-0.220013	-0.193616	-0.0383351	-0.718436	-0.354402	0.0391932	0.011559	0.197434	-0.056802	0.0813345	0.332939	-0.119072	-0.418684	-0.247443	-0.549018	-0.296214	-0.105564	-0.305737	-0.15615	-0.298461	0.0505127	-0.258636	-0.22938	-0.468364	-0.12959	0.343925	-0.07771	-0.17853	-1.10091	-0.189287	-0.301411	-0.321449	-0.557472	-0.168884	-0.0736789	-0.391923	-0.247536	-0.32653	-0.413859	-0.347791	-0.533858	-1.16109	-0.798124	-0.0372966	-0.153825	-0.215855	-0.380706	-0.318994	-0.129018
DAO	-0.205807	0.159812	-0.0835052	-0.150691	-0.316914	-0.323654	0.160422	0.269572	0.177986	0.159206	-0.0406995	-0.392751	-0.216392	0.110352	-0.127362	0.106464	-0.258504	0.375829	0.0294432	-0.142497	-0.22964	-0.209567	-0.393612	-0.179517	-0.0532097	-0.262726	-0.0772063	-0.269194	0.280157	0.0861728	-0.042071	-0.253664	-0.0395523	0.1489	-0.212455	0.0971184	0.304056	-0.153438	-0.341261	0.369055	-0.131107	0.274541	-0.146283	-0.161342	0.236841	-0.156035	0.541671	-0.115939	0.345793
DBI	0.181075	-0.108231	0.317727	0.18368	0.0491356	0.391707	0.214091	0.426643	0.000167	0.115343	0.321417	0.19399	0.0209233	0.683005	0.429807	0.0425953	-0.0483741	0.192185	0.164184	0.421619	-0.0270137	0.200211	0.292333	0.492324	0.146598	0.231279	0.0339951	0.252018	-1.34779	0.0716409	0.439025	0.262647	0.0186518	0.37824	-0.110813	-0.148801	-0.0998692	0.0441166	-0.0665056	-0.0621952	0.567317	0.253855	-0.221327	0.78319	-0.393675	0.101077	0.635703	0.0442136	0.687693
DBH	-0.198833	-0.0613095	-0.177463	0.354695	-0.467008	0.196388	-0.0268944	0.337999	-0.428154	0.0746743	-0.363706	-0.114604	-0.176512	-0.0818105	-0.109605	0.0315848	-0.030082	0.0791	0.106212	0.123164	-0.0306723	0.00847601	-0.0846938	-0.195665	-0.294377	-0.298957	-0.148752	0.0059423	-0.0201919	-0.112298	0.287966	0.0108591	-0.127914	0.0355691	0.0549177	0.235947	0.0594988	0.0221931	-0.396193	0.273614	0.143577	0.369361	-0.254744	-0.31755	-0.210714	-0.0543021	0.365787	0.216829	-0.24509
DBP	-0.450221	-0.281486	-0.0470017	0.0118855	-0.447565	0.197935	-0.248961	0.370664	-0.388352	0.817794	-0.158567	-0.060093	-0.402357	-0.369165	-0.323869	-0.134716	-0.0629266	0.0212098	0.0129121	0.240188	-0.301783	-0.0498582	-0.475218	0.00838685	0.0096241	-0.303693	-0.516328	-0.658685	-0.028568	0.205644	-0.74995	0.607418	0.0957179	0.0124127	-0.316848	-0.471418	0.0396262	0.0549374	-0.298614	-0.229779	-0.177016	0.228685	-0.435995	-0.831355	-0.187438	-0.512206	0.234855	-0.203359	0.91774
DBT	0.0955071	-0.184508	-0.0274384	-0.142379	0.0513733	0.0960345	-0.459716	-0.312646	0.4713	0.00745247	-0.0143956	-0.517264	-0.00681826	-0.218435	0.0263181	-0.0997872	-0.544345	-0.0420431	-0.0101521	-0.078916	-0.0150241	0.0131246	0.0562579	-0.419582	-0.204481	-0.281057	-0.163888	-0.0845312	-0.137951	-0.00846385	-0.178473	0.315862	-0.0161289	-0.0585777	-0.129194	0.00393277	0.098136	0.296264	0.0146981	-0.192066	0.169708	-0.181973	0.280215	0.115412	0.075784	0.00704586	-0.32662	0.194555	-0.02402
DCD	-0.154641	-0.413091	-0.113935	0.137155	-0.457063	0.128216	-0.0519611	0.191568	-0.0913105	-0.0169103	0.00391051	-0.365701	-0.115677	0.0763346	-0.0534669	0.127376	-0.359432	-0.308191	0.193505	0.26791	0.173051	-0.0794265	0.11248	-0.327738	-0.476386	-0.0328726	-0.371704	-0.368707	0.21836	0.0748442	0.0456791	-0.216214	-0.169156	-0.232436	-0.0513851	0.117007	0.198137	-0.295254	-0.192969	0.36171	-0.0301345	0.395511	-0.181076	-0.307301	0.0072145	-0.0546181	0.0247598	-0.126217	0.336834
DCC	-0.0334943	0.364525	-0.254061	-0.0990908	-0.105981	-0.202043	0.097279	0.351225	0.0364902	0.041234	-0.0898783	-0.075744	-0.0535318	0.22967	0.0942928	0.00957231	-0.17262	0.0121927	0.21375	-0.00946043	0.244858	0.333136	0.0917989	0.143297	-0.216749	0.167734	-0.0259623	-0.0747622	0.0824947	0.0300251	0.0313453	0.241093	-0.205185	0.0159852	-0.00203045	-0.227513	0.104947	-0.0294712	-0.090377	0.0502677	-0.165238	-0.104689	0.192303	-0.261123	0.358991	-0.00900792	-0.0524399	-0.212937	-0.140363
DCK	-0.102352	-0.166259	-0.00844947	-0.470779	0.412498	-1.11064	-0.745294	0.170124	-0.0629852	0.144931	0.0423541	-0.336146	-0.208706	0.599021	0.0294955	0.182072	-0.619085	-0.231527	0.49072	-0.0361038	-0.262892	-0.288938	-0.691222	1.02229	0.060863	-0.185924	0.387793	-0.171041	-0.552153	-0.41225	-0.572834	-0.377978	0.491379	-0.0821246	-0.719044	-0.45169	-0.222812	-0.199189	0.32874	-1.05526	-0.229418	-0.613363	-0.136729	-0.453113	-0.237842	-0.287768	0.290821	0.0461741	-0.0982427
DCN	0.240209	1.27093	0.874345	0.214009	0.859702	-0.735133	0.982691	0.535713	0.941289	0.520644	0.687374	1.01483	0.60387	0.0219159	0.642209	0.922522	0.812966	0.68615	0.532281	0.351433	0.686385	0.819467	0.427334	-1.13275	0.322112	1.10317	1.02054	1.10372	0.603559	0.41346	0.193574	-0.228261	0.214038	0.893529	0.0824745	0.576668	0.362011	0.972713	0.926507	-0.0314572	0.281966	-2.01485	-0.521979	-2.21192	-0.482228	0.989635	-1.99758	0.370753	-0.723587
DCT	0.00768911	-0.0905711	-0.132046	0.106739	-0.16599	0.137039	0.00836721	0.0577623	0.178591	-0.0899612	-0.0582387	-0.151438	-0.0258735	0.00314281	-0.0368337	-0.088096	-0.0560674	0.0236456	-0.0772614	-0.174214	0.118184	-0.12388	0.138777	-0.108008	-0.122733	-0.115197	-0.0995691	-0.043492	0.0277923	-0.162137	0.00715944	-0.159466	-0.143866	-0.161308	-0.131843	0.12813	0.0239228	-0.0856923	-0.104269	0.241237	0.0526375	0.0827353	0.0494997	-0.210592	-0.0586131	-0.19431	0.122779	0.0431565	0.204267
DCX	-0.307801	-0.281996	-0.279451	-0.136656	-0.37339	-0.185867	-0.0980221	-0.227904	-0.174855	-0.14408	-0.344826	-0.247151	-0.305833	-0.0942539	-0.175179	-0.246614	-0.18012	-0.116872	-0.308949	-0.177922	-0.18303	-0.34111	-0.183041	-0.122664	-0.173267	-0.17354	-0.282623	-0.319346	-0.15445	-0.0545118	-0.131481	-0.214454	-0.2108	-0.28824	-0.264745	0.0240292	0.341614	-0.359908	-0.165246	-0.0857127	-0.294164	-0.0362306	-0.240429	-0.353538	-0.112943	-0.0796489	-0.0308759	-0.174711	0.152506
DDC	-0.317907	0.686511	0.275981	0.603026	-0.306201	0.222483	-0.00152725	-0.120672	-0.273506	-0.869978	-0.222495	-0.0797887	-0.387842	-0.758137	-0.160954	-0.087283	-0.783069	0.524636	-0.469458	0.0504506	-0.370966	-0.559364	-0.198602	-1.11129	-0.369243	-0.218135	-0.0635526	0.293909	-0.641018	-0.631164	0.186142	0.701117	-1.07254	0.140404	-0.191753	-0.414855	-0.803765	0.716274	-0.266379	-0.560213	0.0605516	-0.463435	-0.302627	-0.960542	0.114739	-0.455502	-0.797297	-0.232527	-0.509677
DDO	0.378001	0.695221	0.582352	0.319123	0.571112	-0.449016	0.243201	0.274067	0.641393	-0.416364	0.268403	0.10446	0.213678	-0.582737	0.400807	0.187203	-0.234864	0.544007	0.943701	0.444802	-0.0439465	0.0739451	0.499818	-0.176191	-0.255479	0.125548	0.287635	0.211604	-0.0133967	0.518772	0.323645	0.110514	-0.15165	0.217223	0.587347	-0.0795265	-0.247473	0.223617	0.618121	-0.107232	0.479611	-0.288785	0.112556	-0.633214	-0.0698668	0.399512	-0.379537	0.336765	-0.495093
DDN	-0.426691	0.0947497	-0.172206	0.118032	-0.207914	-0.0806503	-0.0557882	0.368627	-0.182922	0.209504	0.156228	0.0753943	-0.204782	-0.243272	0.435218	-0.00792871	-0.054865	-0.0640848	-0.142074	-0.234854	-0.326472	-0.191377	-0.166268	0.0831922	-0.0331346	-0.162936	-0.402183	-0.200324	0.21014	-0.123386	-0.213968	0.0509385	-0.0452119	-0.0449431	-0.110521	-0.18552	-0.0380068	0.0517071	-0.226851	0.157989	-0.0691749	0.260882	0.131281	-0.0710913	0.345591	-0.271948	0.897569	0.0889113	0.408215
DEK	-0.238705	-0.309999	0.0136382	-0.274275	0.12804	0.148418	-0.542643	-0.376369	-0.203825	0.523823	-0.37666	-0.308764	-0.182092	0.57798	-0.232615	-0.129655	-0.295604	-0.419866	0.049305	-0.340569	-0.157334	-0.176516	-0.484852	0.108511	-0.32857	-0.3737	-0.106568	-0.145931	-0.0565269	-0.423631	-0.596372	-0.623258	0.605629	-0.242807	-0.27356	-0.283703	0.340486	0.114239	0.0718852	-0.284944	-0.250173	-0.300705	-0.0945218	0.643845	0.102381	-0.431303	0.559866	0.244379	-0.535841
DES	0.35732	0.693489	0.217399	0.283039	0.115929	-0.335923	0.817053	0.0553559	0.571074	-0.51015	0.194683	0.614755	0.148938	-0.72364	-0.0649063	0.398813	0.942609	0.791843	0.300115	0.976329	0.31966	0.541044	0.600385	-0.48446	0.414247	0.556018	0.545877	0.62108	0.0114889	0.757853	0.613283	0.455199	-0.527226	0.563635	0.338095	0.629651	-0.452712	1.40306	0.318837	0.519431	0.366214	-0.280623	-0.190344	-0.500244	-0.625163	0.854578	-0.307147	0.129878	-0.282542
DHH	0.086295	-0.0143561	-0.0130242	0.439895	-0.564015	0.471732	0.215836	0.118532	-0.106542	-0.0788391	-0.220145	0.122047	-0.239564	-0.137849	-0.00194844	0.123239	-0.21061	-0.194526	0.247396	0.364891	0.17942	-0.0608594	-0.00995081	-0.138301	-0.0624928	-0.097219	-0.364053	-0.0931481	0.0374901	-0.0413578	0.19202	-0.20485	-0.103015	0.153256	0.147349	0.0136376	0.0831413	0.0165897	-0.152775	0.230663	-0.0872672	0.0249144	-0.134696	-0.221788	0.00352827	-0.0774551	0.25115	-0.456293	0.0387897
DLD	-0.0613314	0.233066	-0.031358	-0.159346	0.264668	0.163272	0.267791	-0.366481	0.0858834	-0.0750765	0.135346	0.0243889	0.449346	0.274889	-0.0340185	-0.151952	-0.231856	0.357159	0.443955	-0.281307	-0.213639	0.00123568	0.0554202	0.187607	-0.0807297	0.272349	0.0828812	0.285595	-0.440128	-0.130146	0.0979532	-0.00339643	0.15579	-0.0135903	-0.267759	-0.142707	0.273271	0.0281135	0.265514	-0.423303	-0.145377	-0.191961	0.200816	1.05563	-0.288841	-0.253683	0.49649	0.279101	-0.59626
CCNDBP1	-0.00402242	0.32879	0.613055	0.186479	0.448086	-0.00892213	0.641595	0.201006	0.680523	-0.405465	0.408387	0.462285	0.189023	-0.00350468	0.383617	0.591099	0.373504	0.254538	0.579712	-0.187672	-0.247457	0.315138	0.137009	-0.372725	0.25222	0.172716	0.448011	0.62215	-0.264348	-0.0104787	-0.254624	-0.209587	0.0866711	0.52307	-0.0452415	0.28501	-0.735842	0.278317	0.348238	-0.156822	-0.0873716	-0.986016	-0.196214	-0.055715	-1.59538	0.23588	-1.94031	0.258612	-0.871212
DMD	0.125468	0.0878891	0.028015	0.186423	0.0543524	-0.0566307	0.296562	0.0223346	0.0165343	-0.0552375	0.340567	-0.00377395	-0.0924573	-0.259721	0.0633365	0.0727131	-0.0155974	0.0357451	0.0352011	0.0865907	0.230273	0.133161	0.00179355	0.226636	0.0446278	0.240072	0.216302	-7.905e-06	0.14443	0.126526	-0.107758	0.158182	-0.00574234	0.0305408	0.0478487	0.0322925	-0.0714733	0.127087	-0.0506132	-0.0769052	0.176147	-0.034876	0.209448	-0.15492	-0.141729	0.131686	0.0174669	0.00367025	-0.0013712
DPT	0.12404	1.40108	0.943264	0.0741025	0.733526	0.150752	2.00982	0.978063	0.481621	1.55903	-0.413841	0.46516	-0.302007	-0.587249	1.36254	1.78753	0.695749	0.995086	0.643018	1.84014	0.819241	0.34864	1.16819	-0.648128	0.580263	0.646415	1.63846	0.548005	0.00691245	0.44171	0.47003	-1.54039	-0.205656	1.7052	-0.75389	0.82499	-1.46633	1.44692	1.83851	-0.125803	0.276385	-2.06804	-1.48021	-2.77017	-0.687098	1.92088	-2.65979	-0.58065	-0.557657
DR1	-0.193518	-0.124256	0.2247	-0.150244	0.18234	-0.524147	-0.0494235	-0.0440229	-0.124225	0.145946	-0.0223064	0.0330284	-0.080981	0.215894	0.0886648	0.0972103	0.0308365	-0.0173409	0.0220335	0.0539278	-0.111822	0.00566365	-0.127225	0.0198512	0.098374	-0.206764	0.33359	0.0907088	-0.0109425	-0.316107	-0.0201721	-0.197762	0.506492	0.0487008	-0.0747238	-0.146986	-0.334801	-0.075443	0.171208	-0.427606	-0.0243801	-0.451891	0.00906415	-0.0668154	-0.0771111	-0.130963	-0.913175	-0.0268584	0.104697
DSE	-0.13118	0.0756947	-0.0625026	-0.0199427	-0.00836345	-0.193134	0.203596	-0.0193715	-0.121578	0.0577887	-0.0673134	-0.0572182	0.0108102	0.128826	0.155746	0.0847193	-0.00390888	0.0341482	0.171259	-0.0738733	-0.128203	0.111521	-0.0827267	0.191177	-0.0294629	0.00336981	0.0146571	0.0459017	0.0420086	-0.0943409	-0.00633572	0.0898924	0.230792	0.0487162	0.210127	0.264385	0.236645	-0.0435068	-0.216718	0.0819182	-0.144805	-0.00948187	-0.0751862	-0.26826	-0.066759	-0.0265449	0.309046	-0.120832	0.0353119
DSP	-1.06332	-1.01031	-1.8628	-1.21788	-0.83634	1.46671	-1.5767	-2.41702	-0.0070116	2.53362	-1.26644	-3.31644	-0.835465	1.86039	-1.40122	-1.78279	-1.04965	-1.9684	-0.710402	-1.83449	-0.758187	-1.05299	-3.77776	1.38529	-1.10881	-0.958151	-0.287708	-1.98748	-3.20587	-1.10802	-3.53587	-0.688968	2.20365	-0.666751	-1.06048	-0.172643	1.85358	-1.79508	-1.19406	-1.3681	-1.43226	1.93919	-2.55131	3.25268	0.873172	-1.80744	1.14198	-0.422128	1.86419
DST	-0.0201235	0.171581	-0.0611154	0.193553	-0.0622829	-0.356429	0.0615467	-0.298271	0.416086	-0.0769947	0.0331292	-0.110327	0.461903	0.0628747	0.0243495	0.0513267	-0.0856278	0.0519545	0.0792513	-0.0310133	0.0764194	0.0954719	0.0490649	-0.0547948	0.0187405	0.315138	0.351055	0.116353	0.273688	0.0931357	0.0168596	0.0758065	-0.0504631	-0.0407392	0.0762186	0.173964	0.361082	0.149609	0.0348519	0.206943	0.0100096	-0.0701163	0.0902537	0.589106	0.106151	0.14719	-0.0315537	0.0234687	0.190808
DTL	-2.62893	-0.669536	-2.42322	-1.45596	-0.730058	1.02704	1.07545	-0.838143	-1.43957	1.19346	-0.282885	-2.2273	-1.03136	1.59032	-1.51054	-1.57579	0.976157	-0.911266	-0.238722	-1.83397	-1.83898	-2.11008	-0.750062	1.33849	-0.799786	-0.390617	0.0243753	-1.72538	-2.60183	-0.903745	-2.27785	-2.35243	1.11463	-1.57466	-2.01825	-1.68955	1.94287	-2.06349	-0.366615	-2.24187	-2.04653	0.840139	-1.37387	1.68937	1.94029	-1.11639	2.28156	-1.30533	0.820633
SLITRK2	0.251959	-0.00540167	-0.241476	0.0605269	-0.266231	0.30277	-0.227543	-0.266326	-0.0153146	-0.314335	0.117164	0.133706	-0.171564	0.00795804	-0.270273	-0.05478	-0.300906	0.0274051	-0.127395	-0.0765599	-0.0293211	-0.393913	-0.0824761	-0.134548	0.0113954	0.00608946	-0.144399	-0.188404	-0.0734756	0.113708	0.214898	-0.0802058	-0.0460098	-0.0776139	0.265302	-0.0670466	0.892421	-0.0929507	-0.0405505	0.0271647	0.238675	0.201293	-0.15087	0.0916128	-0.111456	0.297703	0.195264	-0.299241	-0.158681
SLITRK1	0.0208637	-0.0880192	0.0727329	0.243832	-0.144319	0.183532	-0.0246181	0.13093	-0.175766	-0.0851502	-0.201998	-0.0403573	0.041383	-0.119701	-0.139019	0.0420552	-0.0909722	-0.199168	-0.248496	-0.168833	-0.272627	-0.00777632	-0.172429	-0.402625	-0.249454	-0.0727064	-0.0948574	-0.151557	0.236464	-0.119771	-0.0865314	-0.0883712	-0.119214	-0.121562	0.0456214	0.0876504	-0.074207	-0.139905	-0.259928	0.16321	0.151751	0.0179533	-0.200791	0.204405	0.153777	-0.278745	-0.0730639	-0.11396	-0.0490865
SLITRK4	-0.115471	0.0230731	0.0338057	-0.072294	0.0384615	-0.0171318	-0.137753	-0.0101933	-0.308385	-0.327173	-0.0745756	-0.219145	-0.118303	0.127823	-0.0195841	-0.0251939	-0.229033	0.103288	-0.0733698	-0.178803	-0.0867911	-0.0136785	0.27817	-0.0753255	0.092049	-0.311459	-0.259176	-0.0889634	-0.334241	0.0415396	-0.223111	-0.0334391	-0.277116	-0.236611	-0.023259	-0.223082	0.140971	-0.161268	0.40155	-0.147545	-0.0227633	-0.0400789	-0.0295277	-0.364852	-0.0447617	-0.132155	-0.0918437	-0.0307763	-0.162739
SLITRK3	-0.0922396	-0.228678	0.0487541	-0.0213179	0.126915	-0.150917	0.0629939	0.0916346	0.185929	0.0236028	-0.0833354	-0.140014	0.124459	-0.0648279	0.0617519	0.17741	0.0069943	-0.167838	-0.0140484	-0.206683	0.173289	0.140626	-0.198521	0.0140613	-0.258388	-0.338103	-0.186406	-0.202362	0.19773	-0.342823	-0.0848586	-0.14839	-0.103877	-0.123692	-0.00166556	0.014258	0.329893	0.826867	0.172861	0.195827	-0.0599575	0.10058	-0.0367492	-0.0190655	-0.197283	-0.118363	0.15375	-0.197772	0.0871918
SLITRK6	0.910558	-0.102972	-0.30835	-0.117089	0.328082	2.01882	-1.10991	-1.51167	1.93391	2.79343	-1.23051	-1.70884	0.29877	-1.20962	-1.79927	0.420966	-0.346584	-0.537134	-0.421255	0.0992655	0.442174	-1.71978	-0.114761	-1.6341	0.0689323	-0.818487	1.11494	0.751726	-1.27767	0.0986384	-1.39878	-0.603887	0.68152	1.133	-0.0747833	1.57006	1.64387	0.0338236	-0.946989	-0.790286	-0.748177	5.03845	-0.930691	0.787569	-0.0802354	-0.650613	1.67313	0.201044	-1.44289
SLITRK5	-0.304719	-0.134159	-0.123652	-0.0345043	-0.0911483	0.723975	0.118836	-0.0169479	0.258219	-0.26139	-0.00924797	-0.0423297	-0.121752	-0.264203	-0.068028	-0.039669	-0.234472	-0.257262	-0.359694	-0.0747984	-0.359498	-0.0812728	-0.360519	0.142649	0.262933	0.129969	0.640903	-0.103569	-0.111161	0.0438642	-0.126235	-0.163867	0.773792	-0.0822041	-0.261053	0.193215	0.395727	0.394503	0.127016	0.180295	-0.112499	-0.113671	0.172529	-0.172096	0.389772	-0.123077	0.0239322	-0.0358082	0.0200274
DUT	-0.54733	0.161868	-0.0604546	-0.0945821	0.0680379	0.619473	-0.157209	-0.390089	-0.0712327	-0.294559	-0.085785	-0.29355	0.0454426	0.272001	-0.502323	-0.185435	-0.89473	0.0380906	0.280954	0.0113579	-0.128993	-0.27004	0.0481019	0.214509	0.135746	0.0282298	-0.0759275	-0.0782028	-0.723044	-0.460481	-0.0975396	-0.234251	0.0274184	-0.296034	-0.129258	0.145123	0.588926	-0.0993445	0.081321	-0.632415	0.139647	0.401331	-0.193693	0.6313	0.307632	0.161394	-0.0747737	-0.00636935	0.0736006
DXO	-0.0260471	-0.116209	-0.322625	-0.0138034	-0.24351	-0.0810927	-0.251552	-0.0608591	-0.142366	0.25546	-0.305672	-0.152934	-0.439327	-0.00671646	-0.278447	-0.0941254	0.333142	-0.114329	-0.268053	0.314729	-0.274449	-0.326915	0.0304623	-0.222976	-0.0341019	-0.0964255	-0.250442	-0.00463817	-0.239692	-0.0734185	-0.325529	-0.00681151	-0.0685901	-0.0266521	0.0210875	-0.297216	-0.224607	-0.0162318	-0.507087	-0.161807	-0.126326	0.0394016	-0.641232	-0.499508	-0.201884	-0.0034968	0.387552	-0.381124	0.295443
DYM	-0.288699	-0.0128238	0.169056	0.401235	0.086392	0.313565	-0.0142171	-0.0102923	0.364513	0.365766	0.148418	-0.292861	-0.0147329	0.540061	-0.0207685	0.151994	0.0169067	0.000292	-0.025229	-0.111208	0.117534	0.0452118	0.0172523	-0.13468	-0.232373	0.0431603	0.174658	0.0224813	-0.399456	0.123027	0.0507051	-0.00869359	0.0212787	0.0395291	0.223703	0.152669	-0.0529195	0.346992	0.139838	-0.222369	0.488117	-0.626937	-0.252416	-0.287879	0.0874939	0.0745561	-0.111989	0.150164	-0.2406
L3HYPDH	-0.57931	0.39469	-0.566569	-0.669787	-0.303334	0.484837	0.286289	-0.267391	-0.283032	0.606537	-0.0993766	-0.186368	-0.0836068	0.49813	-0.0462976	-0.495247	-0.38839	-0.232	0.122323	-0.0345132	-0.486823	-0.25979	-0.0880117	-0.00478712	-0.109725	0.109578	0.433413	0.303203	-0.528633	0.114158	-0.26061	-0.587249	-0.14241	-0.209705	0.197492	-0.317722	1.16413	0.269315	0.341761	-0.373578	-0.123445	-0.800891	-0.0620195	0.437753	0.11774	-0.000332	0.147459	-0.259006	-0.593464
EBP	-0.225501	0.240333	-0.102734	0.0342236	0.322689	-0.039147	-0.17173	-0.312586	0.212774	0.38602	0.0519832	0.267382	0.330252	-0.405675	0.066325	-0.34375	-0.190906	0.175998	0.0931235	-0.0347844	-0.284198	-0.0514138	-0.391678	0.0521417	0.210437	-0.425559	-0.158001	-0.0432786	-0.655429	0.048063	-0.0299655	0.166159	0.512653	-0.0945033	0.169976	-0.245502	0.056799	-0.227467	0.00965743	-0.270971	0.228649	-0.119763	-0.178982	-0.0643323	-0.323602	-0.214293	1.05141	0.206691	0.127592
ECD	-0.418561	0.130154	0.00220902	-0.157301	0.00366264	-0.266866	0.308651	-0.090542	-0.21442	-0.116218	0.146917	0.46747	-0.106101	0.746141	0.0660222	0.22529	0.527069	0.329218	0.121314	-0.612731	-0.503704	-0.224439	-0.132064	0.438166	-0.192701	-0.0993465	0.0469011	0.0703317	-0.143484	-0.409076	-0.355588	-0.792043	0.324498	-0.17338	-0.0194201	-0.090852	-0.0149609	-0.030725	-0.144581	-0.71005	-0.28463	0.0465669	-0.0851189	0.0522022	-0.196526	-0.121125	-0.0838328	-0.55241	0.271029
EDA	-0.175046	-0.0471007	-0.0228192	0.224084	-0.0258426	0.10662	-0.162886	0.0796726	-0.0470752	0.213585	0.00406386	-0.191952	0.0931456	-0.134843	0.0265083	-0.0436716	-0.0691258	0.118251	-0.223317	-0.0346849	0.0830764	-0.0103098	0.0802596	-0.0639356	-0.0553515	-0.0238808	-0.213861	-0.0458488	0.25609	0.0276048	-0.0545517	0.00764439	-0.163156	-0.0412163	-0.0654399	0.139217	0.154803	-0.00143649	-0.0694224	0.311155	0.120532	0.291475	0.10884	0.155435	0.329538	-0.023048	0.105275	-0.139425	0.271693
EED	-0.641893	-0.288888	0.237321	-0.682152	0.362656	-0.110699	-0.686956	0.0619492	0.298204	0.568127	-0.164419	-0.0520663	-0.571883	0.0563243	0.174637	0.109797	-0.0377281	-0.228236	0.120226	-1.00354	-0.5541	-0.678868	-0.635126	0.459911	-0.378318	-0.909661	-0.0707178	-0.121511	-0.553562	-0.570483	-0.724576	-0.468835	0.576439	-0.534823	-0.449775	-0.171748	-0.136659	0.0224438	-0.182125	-1.12332	-0.667074	0.277376	0.203098	0.65406	0.0172813	-0.530944	-0.396207	-0.32408	0.0954567
EFS	-0.602378	-0.00829233	0.135214	-0.244304	-0.045836	1.02975	-0.303331	-0.332118	-0.490788	1.82684	-0.231717	-0.285615	-0.442465	2.14614	0.0403553	0.434761	-0.584551	-0.300871	-0.357574	0.249959	-0.395082	0.030043	-0.231204	0.604626	-0.188894	-0.713824	0.00589472	-0.120877	-0.711261	-0.186688	-0.554994	-0.0850927	0.968406	-0.2014	-0.382233	-0.329038	1.03775	0.789315	-0.488694	-1.08921	-0.173749	1.43112	-0.90248	1.39218	0.860321	-0.185288	2.21798	0.00608899	1.17609
EGF	-0.156954	-0.0966721	-0.115761	-0.418242	0.0228123	0.0695966	-0.321021	-0.483127	-0.133085	-0.418546	0.163209	0.168884	-0.286734	1.24252	-0.0548636	-0.207437	-0.371905	-0.222601	-0.426244	-0.571573	-0.718312	-0.214631	-0.229402	0.171992	-0.215663	-0.276705	0.370719	-0.373243	-0.448845	-0.0759745	0.124263	0.550119	-0.26711	-0.494705	0.168622	-0.521327	1.06687	-0.092941	-0.582405	-0.40963	0.140986	0.237877	0.714996	-0.127126	1.47005	-0.0605796	0.27877	-0.592912	-0.358304
EHF	0.0905716	-0.645272	-0.163702	-0.228131	-0.00463356	0.481326	-0.149516	-0.129959	0.320295	0.253625	-0.414699	0.18228	-0.257254	0.0724273	-0.776689	-0.486862	-0.584963	-0.173846	0.189707	-0.82891	-0.203554	0.59605	-0.0596623	-0.0893404	-0.238817	-0.103324	-0.519097	-0.546639	-0.757268	0.128054	0.321283	0.827287	2.29648	-0.113118	0.941922	0.0258849	0.81688	0.0782604	-0.51653	-0.771884	-0.381546	0.671448	0.0520969	1.85583	-0.810048	-0.422131	-1.66992	-0.190829	0.206788
ELL	-0.152782	0.00747255	-0.168803	-0.117319	-0.262195	0.159035	0.0434618	-0.0366393	-0.119212	0.0654802	0.197161	0.585624	-0.219321	0.300794	-0.263282	-0.0385969	0.582294	0.0027822	-0.221041	-0.0843507	-0.0845758	0.147966	0.18687	0.214773	-0.0221091	0.181232	-0.310462	-0.187171	1.01487	-0.252248	0.0738172	-0.202407	0.208668	-0.0370929	0.407659	-0.140599	0.307574	-0.273545	-0.252283	-0.267026	-0.235371	0.0710414	-0.207197	-0.309025	-0.0562654	-0.116656	0.525078	-0.362277	-0.0679806
ELN	0.428358	0.0307707	0.344463	0.467674	-0.450165	-0.340012	1.22489	1.38661	-0.0762336	0.587515	0.285554	-0.105877	-0.196084	-0.347786	-0.301054	0.548146	-0.0799921	0.269415	-0.299426	0.723904	0.950434	0.493053	0.81826	-0.564353	0.0693244	1.01217	0.228483	0.151331	0.144455	0.370377	0.25966	0.426762	-0.465346	0.378371	-0.168447	0.471532	-0.35965	0.509176	-0.269161	0.812532	0.0633583	-0.891724	-0.673269	-1.09094	0.110267	0.766825	-0.197291	-0.210259	-0.421336
EMB	-0.148012	-0.202376	0.0287687	-0.420724	0.0961768	-0.698914	0.24727	0.661322	0.0981998	-0.709027	0.28929	0.200078	-0.178186	-0.439392	0.36511	0.0813802	0.29554	0.0691702	0.493952	-0.0908327	-0.223709	-0.28416	-0.134752	0.470692	-0.169106	-0.121779	0.293403	0.370494	-0.208937	0.0255808	-0.274432	-0.0502306	0.150937	0.197883	-0.333782	0.124497	0.0215205	-0.131937	0.19613	-0.327961	-0.428871	-0.480483	0.277925	-0.992723	0.120339	-0.00377528	-0.678038	-0.248011	-0.211246
EMD	-0.385183	0.169676	-0.208903	-0.131836	-0.331684	0.527106	0.0827598	0.00525919	-0.141961	-0.104475	-0.0601887	0.350575	-0.0806062	0.784451	-0.513068	-0.334873	0.764656	-0.529959	-0.0231448	0.447182	-0.650541	-0.0299281	0.532569	0.893564	0.258276	0.224818	-0.170075	0.0408002	-0.131812	-0.412815	0.294918	0.196497	0.005	-0.0376876	0.0138737	-0.11025	-0.226103	-0.27442	-0.340888	-0.350423	0.026293	0.183976	-0.847219	0.344989	0.117728	0.289628	1.13623	-0.563333	0.347059
EN2	-0.027871	-0.0910081	-0.129772	-0.044708	-0.410221	0.341488	0.0445442	-0.128576	-0.273369	0.046925	-0.144097	-0.0682168	-0.184843	0.0759586	-0.0260415	-0.111718	-0.166738	0.0653469	-0.219839	-0.326382	-0.0246918	-0.227778	-0.190767	-0.257121	-0.170581	-0.162933	-0.261989	-0.244616	-0.0694387	-0.158186	-0.045558	-0.391623	-0.156188	-0.0820178	0.0966087	0.0503911	-0.197329	0.105694	-0.252205	-0.0750333	-0.180331	0.128412	-0.0978203	0.373117	0.634914	-0.352279	0.329342	0.120398	0.0247664
EN1	-0.31732	-0.031688	-0.260364	-0.288328	-0.272765	-0.0478386	-0.253708	-0.268222	-0.167605	-0.447831	-0.282171	-0.522277	-0.368227	-0.195926	-0.319381	-0.432081	-0.384406	-0.248937	-0.189611	-0.406234	-0.347065	-0.286542	0.0172672	0.175887	-0.199116	0.125186	-0.364352	-0.372463	-0.321561	0.638607	0.279076	-0.333365	-0.5724	-0.389826	0.0562452	-0.325591	0.51502	-0.387122	-0.371458	-0.0489198	-0.217611	-0.195926	-0.253116	-0.116686	1.11039	-0.0266214	0.0865319	-0.300481	0.352271
ENG	0.929892	0.186581	0.282801	0.308953	-0.128357	-0.250753	0.407557	0.153767	-0.0862303	0.416367	0.253481	0.492444	-0.0610523	-0.610669	-0.0158893	0.234726	0.336462	0.595099	0.195335	0.940881	0.507123	0.696301	1.20837	-0.525382	0.279452	0.872308	0.155724	-0.0024551	1.33252	1.10473	1.02619	1.05864	-0.359862	0.824145	0.382081	0.156763	-0.562908	0.440856	-0.0485783	1.00809	0.400319	-0.650478	0.0098701	-1.31346	-0.383891	0.751899	-1.21034	0.0733601	0.115516
F10	-0.16338	1.04302	0.518546	0.313837	0.291044	-0.24589	0.260469	0.0284357	0.651326	-0.436048	0.259188	0.587328	0.314447	-0.780254	1.01164	0.685232	0.367792	0.706857	0.449525	0.603403	0.129833	0.550936	0.826352	-0.211718	0.624653	0.668526	0.770563	0.526684	0.247292	0.264956	-0.0601627	0.316284	-0.378142	0.58608	0.441809	0.500293	-0.0120013	0.716696	0.690124	-0.0431493	0.275418	-0.334902	-0.25122	-0.432171	-0.39988	0.772641	-0.0614674	0.0565784	-0.106229
F12	-0.673002	-0.256588	-0.504045	-0.468463	-0.83803	1.9211	-0.592634	0.13027	-0.360602	0.297021	-0.588296	-0.394794	-0.719511	0.580018	-0.501547	-0.60923	-0.436118	-0.481771	-0.503838	-0.376416	-0.519241	-0.557809	-0.503577	0.0818183	-0.731759	-0.667783	-0.507545	-1.00707	-0.318989	-0.233203	-0.399546	-0.440912	-0.0523027	-0.435352	-0.200969	-0.548638	0.49696	-0.639316	-0.458992	-0.0781854	-0.309017	1.02181	-0.397554	1.14267	-0.100665	-0.694152	0.92235	-0.341295	1.08637
F11	0.211421	0.157568	0.118264	0.149814	0.0651175	-0.0764482	0.0366536	0.13502	-0.0256303	-0.123315	0.0943847	0.188761	0.0844908	-0.0981151	0.109213	0.00749582	-0.0420761	0.361597	0.0282541	0.011715	0.30509	0.152294	0.0431032	-0.0624298	0.15836	0.0234365	-0.0566803	0.0403868	-0.111387	0.173299	0.38854	0.00819848	-0.165951	0.0721905	0.150096	-0.0240153	0.0325069	0.0266282	0.0362875	-0.126733	0.0484422	0.0319787	-0.00894923	-0.122521	-0.015179	0.000938888	0.193598	0.0459376	0.0270169
MRPS11P1 /// MRPS11P1	-0.0136281	-0.0347887	-0.112228	-0.0288735	-0.0194203	0.474149	0.0772201	0.238412	-0.299782	-0.0910315	-0.133345	-0.170374	0.0946545	-0.260324	-0.0891594	-0.189155	-0.039193	-0.0697601	-0.0502095	-0.0739306	0.129737	0.0586322	0.0633997	-0.0456593	-0.0160115	0.220948	-0.0145568	-0.0813725	-0.0130578	-0.0721186	-0.090224	0.116774	-0.0075637	-0.0992552	-0.147482	-0.281418	0.176277	0.209905	-0.100995	0.146626	-0.0152477	0.151253	0.114574	-0.272822	-0.249402	-0.0788611	0.218444	-0.0139696	0.072476
EPO	-0.413607	-0.168014	0.00152994	0.0469853	-0.0582112	0.105523	0.280287	0.179359	-0.401608	0.0722236	-0.0919475	0.0242531	-0.108504	-0.0565365	0.227977	-0.0272918	-0.116936	-0.0071574	-0.175802	-0.0748807	-0.326902	-0.160495	-0.0420472	0.139797	-0.0897057	0.0337264	-0.209756	-0.242715	0.092538	-0.275284	-0.022867	-0.0831353	-0.0492604	0.0249755	-0.06618	0.276166	0.339989	-0.0794448	-0.383526	0.0639133	-0.0831765	0.308127	0.0778021	-0.0829327	0.149048	-0.0720325	0.556048	-0.280868	0.164135
EPX	0.226542	-0.124186	-0.144287	0.0834518	-0.144231	0.0313669	0.0849377	0.353672	-0.270089	-0.233359	-0.342267	0.0907601	0.0349338	-0.292177	-0.0468258	-0.0638833	-0.108285	-0.299951	-0.26117	0.073773	-0.0524527	-0.10149	-0.284612	-0.135501	0.052954	-0.261916	0.00262136	-0.0504323	0.0208466	-0.0492104	-0.331801	-0.241723	-0.531669	0.105357	-0.0795471	0.0957296	0.189635	-0.100235	-0.0792108	0.140429	0.101634	-0.032171	-0.0434909	-0.218629	0.213549	-0.196887	-0.0593856	-5.25e-05	0.587021
F2R	-0.0299009	-0.440972	0.127454	-0.173785	-0.236332	-0.193811	-0.275163	-0.588991	-0.302869	0.84754	0.505577	-0.43137	-0.271201	0.104226	0.203999	0.285765	-0.160515	-0.225359	0.0689353	0.343915	0.0763252	-0.541734	0.11913	0.00671165	-0.184418	1.20927	0.114941	-0.0778245	0.305893	-0.403802	-0.0304742	-0.212587	0.00632439	0.423123	-0.32092	0.110982	0.394574	0.393333	-0.120504	0.613571	0.458268	-0.746153	-0.382452	0.0805035	0.788034	-0.154141	-0.595679	-0.0567464	-0.309672
ERF	-0.438011	-0.0468892	-0.318582	-0.112649	-0.610159	0.210539	-0.0879438	-0.346016	-0.742803	0.666299	-0.442705	0.0795687	-0.598812	0.756593	-0.0866553	-0.0171956	0.502082	0.160515	-0.795657	0.00892856	-0.548784	0.262945	0.144305	0.520614	-0.195688	-0.203102	-1.09055	-0.322561	0.736871	-0.267326	-0.291082	0.141961	-0.00285346	0.0565387	-0.158361	-0.117428	0.243061	-0.202564	-0.725254	-0.00782514	-0.345244	0.0116464	-0.382102	-0.0728038	-0.189029	0.120602	0.842319	-0.717556	0.111744
ERH	-0.137227	-0.162488	-0.634904	-0.230518	-0.354535	0.0065071	-0.182795	-0.156191	-0.067141	-0.0262927	-0.164208	-0.305989	-0.0974032	-0.267924	-0.415777	-0.398362	-0.0661594	-0.421562	-0.232741	-0.203873	-0.0816553	-0.358759	-0.245869	0.157679	-0.113867	-0.197201	-0.119086	-0.229901	-0.904037	-0.295948	-0.456288	-0.273828	-0.0153053	0.0163838	-0.396673	-0.527845	0.381996	-0.502135	-0.24051	-0.372089	-0.185123	-0.0547855	-0.123832	0.0267586	-0.1792	-0.28861	1.22115	-0.187282	-0.516963
ERG	0.711219	1.42438	0.637225	0.200585	0.324987	-0.480658	0.77766	-0.333865	0.162486	-0.561067	1.11582	0.51539	0.770186	-0.380762	0.573495	0.597517	1.26042	0.622389	0.470916	1.04131	0.776374	0.428948	1.11088	-0.32413	0.736034	1.74662	0.523935	0.857838	1.53354	0.0812809	0.569059	0.0739002	-0.469854	0.817972	0.56094	0.354352	-0.641865	0.502338	0.345478	1.43358	0.882429	-0.736034	0.887364	-0.389361	-0.383561	0.57473	-0.51259	0.756457	-0.770172
ESD	-0.123322	0.299819	0.335601	0.0434747	0.41412	-0.21909	0.281635	0.193677	0.404339	-0.0406046	0.21252	0.0461935	0.207894	0.053582	0.285256	0.317464	0.0353929	0.537829	0.422945	0.24307	-0.00285207	0.110008	0.112644	-0.266315	0.0331339	0.218962	0.259863	0.288894	-0.227617	0.0346384	-0.106883	0.176017	-0.313479	0.324275	-0.421939	0.195045	0.0294903	0.807254	0.339155	0.0396084	0.0537932	-0.321345	0.149918	-0.315644	-0.285997	0.111726	0.183459	0.409943	-0.668834
EVC	-0.063424	-0.131779	-0.115567	0.122635	-0.0662549	-0.0960344	-0.0262067	0.0991299	-0.233038	0.221218	0.113219	-0.137258	0.0217153	-0.0726173	0.114252	0.216317	-0.0328726	0.0698721	0.253097	0.273919	-0.23777	0.0922459	0.2628	-0.112296	-0.329202	0.125646	-0.116922	-0.0858501	0.134373	-0.020437	0.00174033	-0.110408	-0.125841	0.36145	0.0182799	0.161339	0.0887368	0.0990763	-0.351237	0.0228354	-0.0990119	0.0498592	-0.0246524	-0.439347	0.0608595	0.260014	-0.0390072	-0.266902	0.180299
EVL	0.266896	-0.21397	0.560506	0.37403	0.0890676	-0.198055	-0.301269	0.373315	0.163117	0.468244	0.304392	-0.39906	0.190117	-1.22509	1.06598	0.415685	-0.0640687	0.623653	0.683574	0.170522	-0.0747516	-0.275162	0.10132	0.750031	0.117519	0.457176	0.509878	0.0796202	-0.206727	1.20463	0.820879	0.88345	0.385281	0.525413	0.371476	0.40354	-0.618788	0.291388	0.00272325	0.368947	0.523146	-0.478092	0.604918	-1.05758	0.10671	0.391545	-1.11751	0.212773	-0.0144043
EYS	-0.0951523	0.0577489	-0.183369	0.0500755	0.0360351	0.168145	-0.113079	-0.0546951	-0.0473099	-0.164577	-0.127277	0.124507	0.12641	0.0365606	-0.0445188	-0.0532921	0.010385	0.0485598	0.0304873	0.146117	-0.0287797	0.0510595	-0.0964033	-0.0982859	0.283282	-0.045196	-0.0666834	0.288686	-0.209541	-0.093093	-0.0535731	0.0240851	0.134065	-0.273886	0.0345913	0.0192951	0.11103	-0.00189723	-0.113852	-0.228033	-0.250779	0.0693952	0.0238825	-0.0770982	0.111169	-0.03642	0.00118472	-0.14169	0.0194461
EZR	0.679933	0.197021	-0.484177	-0.333341	-0.305799	-0.53592	1.02288	-0.128251	0.692727	-0.245524	0.370584	1.03796	0.451541	-0.709651	-0.736849	-0.478769	0.618606	0.46997	0.165929	-0.0723929	0.448241	1.50233	0.466591	-0.411822	0.0851327	0.759367	-0.342727	0.449011	1.00704	-0.0166464	0.702478	0.881296	-0.102343	0.11873	0.777646	0.522992	0.0754256	-0.647927	0.135654	0.82999	-0.201804	-0.207708	0.299625	0.389209	-1.0402	0.420953	-0.766037	0.0961276	-0.757146
RBM14-RBM4 /// RBM4	-0.196317	0.0929472	0.0431051	-0.0633518	-0.237708	0.0932694	-0.166234	-0.00847894	-0.215691	0.0681019	0.0722797	0.0879216	-0.328481	-0.139156	0.0158559	-0.00266414	-0.00228037	0.412663	-0.213285	-0.00590748	-0.156088	-0.140534	0.0217117	0.198552	-0.17754	-0.0808355	-0.168538	-0.183794	0.10704	-0.139969	-0.103299	-0.239751	-0.147523	0.0435319	-0.343647	0.0890766	0.135418	-0.114101	-0.313986	-0.0553987	-0.165274	0.26959	0.0487569	0.051074	-0.130855	-0.141475	0.211502	-0.112313	0.18145
FAH	-0.117186	0.101908	0.316219	0.262803	0.0375167	0.99742	0.189856	0.0713999	-0.302426	-0.241459	-0.0120383	0.133727	0.00108654	-0.0542492	-0.130347	-0.123009	0.0321517	0.0848911	0.176468	0.132142	-0.276803	-0.0444705	0.0850432	0.146146	0.159276	-0.176388	0.169452	0.0138524	-0.770616	0.430049	0.402356	0.172992	0.255588	-0.139478	0.087915	-0.0596019	0.470331	0.0316039	0.0729048	-0.378063	-0.206225	-0.172272	-0.490071	0.0285916	-0.560296	0.0858161	0.953564	-0.185387	-0.289938
FAP	-1.55793	-0.829392	-1.16438	-1.50385	-0.856775	0.153814	0.308784	0.437892	-0.962898	2.77861	1.24448	-0.615333	-1.54005	1.66684	-1.8408	-0.213978	0.18515	-1.27197	-0.499841	-1.0471	-1.55746	-1.8883	-0.595421	-0.565489	-1.34885	-0.319464	0.689013	-0.863569	-1.85096	-2.22073	-1.61379	-2.4861	2.47557	-0.499322	-1.90189	-1.72775	2.38338	-1.84577	-0.724612	-1.78076	-2.07251	-1.8319	-2.22299	-0.642918	0.623808	-0.349803	0.177555	-2.04937	0.0488529
FAS	0.735184	0.568649	1.301	-0.115163	0.732582	-1.34981	1.34275	0.350066	0.39293	-0.0844208	1.47195	1.48078	0.276041	-0.471731	0.967347	1.01061	1.50683	1.07373	0.772637	0.388845	0.674396	1.30238	0.81304	-0.229148	0.390802	-0.198929	1.00449	1.47976	0.89414	0.169394	0.220562	0.00122159	1.38748	1.05717	0.0806139	0.193643	-0.584797	0.739345	0.544815	0.813949	0.546759	-0.962363	2.06824	0.0296242	-0.858071	0.475027	-2.32516	0.30626	-2.10772
FAU	-0.268645	0.129117	-0.0621892	0.524566	-0.0403721	0.00355863	0.324672	0.182302	0.0723004	-0.316896	0.00623692	-0.0690541	-0.0984203	0.201624	-0.0256864	-0.0219041	0.212826	0.0349575	0.243091	0.176144	0.0109441	-0.00462698	0.419984	0.187823	0.0345309	0.38331	0.0360318	0.3098	-1.0688	0.214004	0.248232	-0.224807	0.111233	0.13694	-0.0318566	-0.00599975	-0.107037	-0.0591408	0.0970238	-0.453839	0.0647346	0.00123235	-0.83106	-0.229272	-0.17684	0.207083	0.226187	-0.365727	0.362964
FBL	-0.856022	-0.172202	-0.358662	-0.318386	-0.47992	0.242298	-0.274009	0.320765	-0.439811	0.800871	-0.594439	-0.43347	-0.777923	1.99543	-0.452673	-0.09911	0.095071	-0.392671	-0.363187	-0.272176	-0.852366	-0.492248	-0.622241	1.34703	-0.489587	-0.546789	-0.572676	-0.351941	-1.11472	-0.606357	-0.937613	-0.911981	0.508044	-0.520652	-0.567737	-0.299484	0.634774	-0.351419	-0.235929	-1.03806	-0.839146	0.456541	-1.55292	0.277731	-0.542287	-0.609593	1.44771	-0.586117	0.40617
FER	0.165128	0.562609	-0.39468	0.000715	0.136525	0.424711	0.626859	-0.192097	0.256506	0.144019	0.45864	0.121133	0.591643	-0.416058	-0.297273	0.182196	0.0122009	0.229098	0.457832	0.419705	0.131617	0.217151	0.438931	0.204447	0.402299	0.567855	-0.0496516	-0.0280825	-0.0450263	0.0918166	0.353613	0.402265	0.392935	-0.239998	0.166041	-0.0614866	-0.270603	-0.229293	0.0672178	0.195197	0.00356823	-0.717986	0.557131	0.015432	0.00163053	0.433102	-0.485515	0.0854678	0.0642075
FES	0.0435615	0.425649	0.389241	0.206301	-0.258235	-0.140981	0.259103	0.100661	-0.771602	-0.954644	0.427632	1.19435	0.195211	-0.341881	0.198742	-0.174792	1.16508	0.36985	0.466229	1.1139	0.311907	0.562159	0.960483	1.6936	0.729828	0.805238	0.530261	0.463967	0.617079	0.679613	0.907213	0.507523	-0.187456	0.18555	0.825388	-0.409407	-0.332083	0.0363553	-0.00621896	0.010709	0.598923	-1.03946	-0.863139	-1.22319	-1.04991	0.893004	-0.608876	0.337859	-0.527161
FEV	-0.080409	0.116218	-0.0271721	0.242708	-0.368383	0.0713164	0.423122	0.514422	-0.137815	-0.137253	0.179989	-0.0287164	-0.0660573	-0.0874104	-0.224172	0.149741	0.054686	-0.00882081	-0.328132	-0.00863666	-0.202564	-0.234977	-0.317475	-0.00433958	-0.0751663	-0.358268	-0.247505	-0.125902	-0.0956353	-0.191551	-0.271488	0.0240762	0.054862	0.231847	-0.327123	-0.0970914	0.362073	-0.278025	-0.260095	0.492842	-0.209649	0.258001	0.125874	-0.122575	0.225195	-0.355519	0.61776	-0.363447	0.636523
FGB	-0.96962	-0.357273	-0.797663	-0.832095	-1.01489	-0.815105	-0.64808	-0.694451	-0.932578	-0.697323	-0.764779	-0.770129	-0.86277	-0.846785	-0.768486	-0.836039	-0.851693	-0.872966	-0.954256	-0.878949	-0.726592	-0.823215	-0.781732	-0.478208	-0.466405	-0.714673	-0.86953	-0.882454	-0.870265	-0.944054	-0.762656	-0.811256	-0.807738	-0.657401	-0.824313	-0.725138	-0.664664	-0.894412	-0.885702	-0.689729	-0.84338	-0.615133	-0.858875	-0.748013	-0.775217	-0.865125	-0.49595	-0.792106	-0.598372
FGA	0.274074	1.30111	-0.156948	-0.310311	-0.510299	-0.91183	0.322977	-0.0459819	-0.628674	-0.903477	0.0273698	0.149256	-0.881378	-1.105	-0.291856	-0.143238	-0.128388	-0.319179	0.12727	-0.621268	0.76161	-0.0188663	0.81994	-0.946536	-0.10337	-0.972029	-0.76968	-0.946096	0.170708	-0.819744	0.0905843	0.169888	-1.03034	0.0704244	0.795327	-0.972844	-1.04597	-0.167466	-0.45065	-0.0165119	-0.251152	-0.925449	-0.440301	-0.830546	-0.921342	-0.924755	-0.825764	-0.428054	-0.821312
FGG	3.10775	3.27104	3.38971	0.924705	1.61776	-0.15652	2.82207	1.95526	0.558712	-0.703326	1.98927	1.18967	-2.91446	-5.17516	3.39847	2.127	0.391053	2.7293	3.46915	1.19577	2.52928	1.52168	3.48928	-5.4062	2.44985	-0.228135	-0.807813	0.169764	1.793	0.950377	2.5496	3.38693	0.916484	2.44638	1.83934	0.632974	-4.75973	2.71297	1.84377	2.42845	2.32287	-4.9234	2.15269	-5.2551	-0.234052	0.952311	-4.39911	0.342041	-4.89643
FGR	0.740131	0.57991	0.75508	1.03358	1.03224	-1.11958	0.788422	-0.510248	0.527547	-1.55577	0.964639	1.88438	0.907708	-2.57872	1.2753	0.375137	1.31858	1.03472	1.29862	1.22424	1.13736	2.17641	1.2799	1.11776	1.07706	1.0677	0.970392	1.51715	1.99623	1.60657	2.22334	2.50144	-0.0652753	1.26555	1.6116	0.539338	-2.07355	0.696798	1.26526	1.25737	1.11832	-1.8937	1.05646	-2.27754	-0.55409	0.964158	-2.13336	1.3564	-0.918951
FLG	0.0676108	0.112026	-0.0912842	0.148384	-0.154882	0.0531296	0.115858	-0.0136493	-0.203691	0.126869	-0.0259666	0.182872	0.148399	0.0599629	0.0111595	0.0534956	-0.0975009	-0.0474069	-0.124242	-0.194571	-0.0619579	-0.0411738	0.126619	0.23261	-0.227958	0.027555	-0.219286	-0.0260204	-0.114416	0.0386766	0.0326953	-0.319649	0.103563	0.0767036	-0.128823	0.0680329	0.0782965	-0.211277	-0.189578	-0.0588922	0.0699723	-0.13359	-0.0595461	0.836341	0.00163894	0.163808	0.0847906	-0.173057	0.0807
FN1	-0.109056	-0.205378	0.324993	-0.592273	0.427431	-0.172807	0.348545	-0.863433	0.198787	0.846708	0.141563	-0.162946	0.282165	0.00568954	0.333094	0.348503	0.121499	0.382182	0.302074	0.280823	0.302043	-0.362241	-0.0714023	-1.31054	0.277706	0.290163	0.721924	0.478736	-0.0293889	0.382153	0.480056	-0.533128	0.504144	0.511765	-0.357116	-0.511775	0.474712	0.227584	0.469571	0.249693	0.115879	-1.89777	0.497979	-1.95879	0.101153	0.453158	-0.338974	0.280977	-0.823937
FOS	0.951234	1.69277	0.999624	1.6137	2.27223	-0.66788	0.331525	0.0042376	2.36734	0.0512181	2.19958	1.1444	0.493745	-0.532006	2.06461	1.74549	0.584507	1.04632	1.49931	1.1453	1.87283	2.36678	0.88154	-2.33323	2.10655	-0.618114	1.44876	1.74641	2.44147	-0.657354	-0.459187	2.58892	1.20205	1.02038	1.64929	2.12374	-1.44613	-0.336495	0.0356657	-0.756333	0.0593969	-3.89894	0.698813	-1.81955	-1.11989	1.69289	-3.02178	1.7462	-0.872188
FRK	-0.0462683	-0.379663	0.0142393	-0.144024	0.419079	0.797803	0.179061	-0.184053	0.422581	0.114551	-0.0938996	0.708796	-0.0767752	0.973484	-0.107497	-0.0717239	-0.284388	-0.238723	-0.381728	-0.167145	-0.118622	-0.881373	-0.516424	0.774424	-0.184476	-0.877676	0.489338	-0.543504	-1.0907	-0.592379	0.71859	-0.326913	0.259033	-0.170031	0.606973	0.288969	1.34077	-0.296537	0.267631	-0.882875	-0.587569	0.433027	-0.161425	1.60204	0.148341	-0.406077	0.20497	-0.265375	-0.16803
FRY	0.279135	0.938166	1.02059	0.191435	0.93352	-0.805268	1.68085	-0.0667638	1.15616	-0.964109	1.52346	0.425665	0.969732	-0.222049	1.10818	0.697483	0.506231	0.926201	0.536831	1.25197	0.953648	0.816278	1.09138	-1.05017	1.06161	1.79387	1.23343	1.72841	0.286133	0.834487	0.522938	0.608434	-0.898069	0.757277	0.701817	0.0788146	-1.1089	1.12333	0.871259	0.878799	0.935181	-1.33764	1.35366	-0.780051	-0.219168	0.721618	-0.745583	0.618163	-1.13976
FST	-0.90592	-0.312338	-0.569362	-0.727786	-0.806531	1.88468	-0.524212	-1.10784	-1.17362	1.53501	-1.21318	-0.408905	-0.866969	3.29327	0.65511	-0.0168347	2.9216	-0.43577	-1.03965	-0.540192	-0.470535	0.339824	-0.258602	3.02881	-0.525118	-0.893662	-0.28891	-0.235774	-0.37064	-1.08182	-0.459149	-0.890442	0.0320191	-0.509627	-0.14238	-0.603743	1.881	-0.345961	0.784794	-0.317763	-0.472927	3.04057	-1.22831	1.46967	1.34901	-0.0991541	3.10167	-0.259668	2.02198
FTL	0.317433	0.00176675	0.283795	0.14948	0.12637	0.265085	0.236916	-0.0563167	0.144356	-0.0263518	0.251091	0.288	0.0821626	-0.387836	0.194262	-0.324137	0.0575161	0.202564	0.293676	0.0738605	0.131144	0.426501	0.0738531	0.0671165	0.322948	0.333849	-0.000569802	0.174429	0.0376769	0.18881	0.417602	0.38933	0.227767	0.246748	0.145524	0.0483978	0.194451	-0.104961	-0.0871004	0.27043	0.228008	-1.6224	0.0325847	-1.35434	-0.255072	0.239709	0.105849	0.185828	0.133338
FTO	0.791813	0.182785	0.129566	0.0379704	0.0258087	-0.326842	0.190612	0.220133	1.51372	0.0632424	0.0246665	0.14231	0.0727676	-0.155861	-0.0239359	0.650523	0.0549434	0.179343	0.00735167	0.662078	0.842862	0.161577	0.0765144	-0.544355	-0.00781738	0.162334	0.171334	0.472976	-0.116931	0.298152	-0.00831769	0.105846	-0.208859	0.273859	0.407448	0.256492	-0.167458	0.152064	0.074546	0.388404	0.670791	0.0266306	-0.310971	-0.899534	-0.40023	0.132317	0.63042	0.413716	-0.657688
FTX	0.375555	-0.951268	-0.795606	-0.0017184	-0.373132	0.324685	-0.098147	-0.550137	0.688657	-0.157853	1.25159	0.116601	1.44437	1.06339	-0.704787	-1.34526	-1.05011	0.451628	0.771069	-0.659757	0.550661	0.30171	0.215535	0.164088	-0.538679	0.93329	-0.0990273	-0.182401	0.248216	0.560846	0.581135	1.68619	0.450881	-0.456914	0.3837	0.566883	0.1531	-1.11088	-0.142961	0.50676	-0.388635	0.755152	0.377977	0.488843	0.432086	0.266702	0.395604	-1.2348	1.04081
FUK	-0.0434887	-0.0177188	-0.185284	0.332577	-0.170415	0.477333	-0.258683	-0.0294557	-0.00170889	-0.569607	-0.0596857	0.0935436	-0.215297	-0.140933	0.110389	0.0161102	-0.176845	-0.00197007	0.0128687	0.557998	0.0237947	-0.347637	0.11809	-0.338441	0.209645	-0.062185	-0.0256922	0.200716	-0.16152	0.00981941	-0.137945	0.386613	-0.168846	0.268507	-0.0859746	-0.0119508	-1.20618	-0.0031168	-0.540823	0.393646	-0.0719894	0.389423	-0.378127	-0.858984	-0.574141	0.213786	0.307154	0.048051	0.0387185
FUS	-0.121013	-0.189705	-0.384862	-0.28522	-0.420745	-0.0875797	0.0738736	-0.172201	-0.33792	-0.0658851	-0.274422	0.12569	-0.0128349	0.213453	-0.131804	-0.478857	0.0573446	-0.276493	-0.110817	-0.280844	-0.368088	0.200747	-0.0396135	-0.22018	-0.0103475	0.185111	-0.585781	-0.294318	0.347282	-0.264469	-0.00704221	0.325627	0.186325	-0.137018	-0.214895	-0.0906597	0.0134541	-0.653331	-0.269132	0.0145605	-0.321695	0.411427	-0.286746	0.0711455	-0.134976	-0.00462441	0.428485	-0.378243	-0.0215768
FUZ	0.18759	0.00133705	-0.224633	0.0250881	-0.159506	0.176322	0.176153	-0.17427	0.516995	-0.0816321	-0.0997247	0.0111806	0.140769	0.0127534	-0.264098	0.0740456	0.329066	-0.115936	-0.0288776	0.106861	-0.330967	0.0990805	0.13953	0.0286527	-0.0940507	0.182629	-0.409415	0.207867	0.0407745	-0.0520634	-0.0393406	0.320552	-0.201681	0.0967935	-0.532771	0.413309	0.065714	-0.239486	-0.571128	0.047614	-0.308218	0.0885179	-0.541215	-0.469825	-0.0904435	-0.00795773	0.613228	-0.291362	-0.0236925
FXN	-0.173612	0.108503	0.0070363	0.0508115	0.0502631	0.17	0.041903	0.0752999	-0.129783	-0.0092078	-0.112706	0.203896	-0.157447	0.499172	-0.118011	0.0807899	0.0850366	-0.0943036	0.00155093	-0.064458	-0.193545	-0.0536043	0.121204	0.498235	-0.0527712	0.112993	0.0756824	0.0844632	-0.437848	0.0271009	-0.180626	0.0946967	-0.0931641	0.159749	-0.445205	-0.0310035	-0.134813	-0.00762731	-0.0495286	-0.101486	0.0448028	-0.360628	-0.305209	0.266778	-0.200591	-0.0940293	0.737058	-0.186448	0.931725
FYB	0.0966142	-0.0517578	0.382591	-0.399034	-0.0391845	-0.434113	-0.145039	0.574882	-0.314614	-0.588806	0.251937	0.284125	0.036512	-0.826985	1.01052	-0.128746	0.177321	-0.181616	1.07815	-0.0119738	0.153474	0.174867	0.272462	1.06827	0.555263	-0.452654	-0.682336	-0.152997	0.628673	-0.285634	0.167481	0.127226	0.92219	-0.0405802	0.150325	0.428517	0.121953	-0.227848	0.074605	-0.348935	-0.719798	-0.241574	-0.275157	-1.33477	0.591142	0.274193	-0.967908	-0.324838	-0.133427
FYN	0.278788	1.34084	0.380092	0.320943	0.463814	-1.11122	0.748882	0.534308	0.270336	-0.215495	0.916929	0.857824	0.511457	-0.0812314	0.343169	0.106729	0.622966	0.984966	0.432511	0.876576	0.290728	0.417744	0.605927	0.42408	0.992201	0.947262	0.410496	0.959977	1.20492	0.0687961	0.138468	-0.0143602	-0.0979842	0.270629	0.150673	0.527484	0.325633	0.28672	0.775032	0.616094	0.25545	-2.00047	-0.294772	-1.32044	-0.0707818	0.472197	0.236127	-0.0294858	-0.104743
GAA	-0.0296532	0.659111	0.341202	0.977565	0.12645	0.225185	0.269482	0.0215306	0.265677	-0.485332	0.089679	-0.18535	0.231293	0.433718	0.18693	-0.383114	0.0991448	-0.0952877	0.493249	1.1707	-0.504809	0.393609	0.136848	0.39102	0.592677	0.518891	0.565495	0.724576	-0.25111	0.450588	1.24896	0.737258	-0.121364	0.0634818	-0.371504	-0.498646	-0.655752	-0.242666	0.0777106	-0.286547	0.292545	0.649716	-0.708054	-1.02648	-0.465561	0.654193	-0.51917	-0.355098	-0.39263
GAK	0.0512244	0.0123791	0.208141	0.0796669	-0.222079	0.503987	-0.313675	-0.251884	-0.18952	-0.205366	-0.438144	0.103851	0.122242	-0.789288	0.368927	0.0675319	0.218337	0.0395544	-0.0280762	0.60336	-0.233196	0.115416	-0.0228583	-0.00680303	0.392076	-0.00743396	0.0308798	0.0462166	0.234755	0.500536	0.388935	0.509159	0.406868	0.0511849	0.253097	-0.03463	-1.08056	0.207502	-0.0930943	0.394057	0.242571	-0.326275	-0.01412	-0.504288	-0.268244	0.154022	-0.600578	-0.0269451	0.0136569
GAL	-0.296063	-0.417582	-0.431773	-0.233524	-0.391373	0.0751214	-0.120245	-0.253904	-0.414191	0.275787	-0.306236	-0.377835	-0.489671	-0.0123864	-0.152721	-0.461497	0.0844938	-0.438335	-0.325955	-0.178448	-0.0917612	-0.436555	-0.169408	0.148557	-0.385728	-0.404217	-0.556969	-0.280171	-0.109638	-0.49315	-0.480194	-0.53984	-0.31157	-0.302492	-0.192106	-0.356125	-0.129601	-0.422468	-0.398553	-0.29633	-0.220129	0.542439	-0.308523	0.524945	-0.293216	-0.488307	1.92565	-0.332861	1.00019
GAN	-0.0638326	-0.0453852	-0.131732	-0.0697296	-0.103984	0.696542	-0.188971	-0.323738	-0.101296	0.0478658	0.0191977	-0.189597	-0.342497	1.78309	-0.156817	-0.183756	0.257255	-0.5798	-0.23631	-0.306496	-0.178222	-0.263551	-0.168915	0.0213671	-0.308342	-0.302202	-0.0494518	-0.287114	-0.178673	-0.124395	-0.377063	-0.120588	0.224987	-0.289335	-0.11894	-0.190448	0.458037	-0.251461	-0.0733884	-0.053552	0.0588983	0.316905	-0.199528	1.87951	0.145784	-0.203106	0.875852	-0.042136	1.15676
GCA	0.598646	0.367312	0.419041	0.732986	0.821395	-1.26494	0.506198	0.106591	0.0294315	-1.00199	0.627968	1.07668	0.345948	-0.936375	1.079	0.291153	0.969112	0.212686	0.601907	0.455248	0.66572	0.820417	0.638056	-0.594092	0.358494	0.0234188	0.588547	0.474013	1.26404	0.152068	0.648683	0.572566	0.185565	0.242784	1.05749	-0.581214	-1.70646	0.408048	0.945805	-0.309046	0.585111	-1.71112	0.184806	-0.785286	-0.916012	-0.22439	-1.87085	0.812026	-0.907973
GCG	-0.219174	-0.0385744	-0.127049	-0.187772	-0.345957	-0.217739	-0.329342	-0.311907	-0.300606	-0.254171	-0.259869	-0.343507	-0.347858	-0.190883	-0.253766	-0.166272	-0.239965	-0.215532	-0.0859997	-0.33537	-0.310365	-0.301825	0.519456	-0.463186	-0.403718	-0.12579	-0.463702	-0.250586	-0.204002	-0.335203	-0.524696	-0.386129	-0.380062	-0.262038	-0.205159	-0.300603	0.156482	-0.224069	-0.434811	0.129342	-0.258178	-0.321832	-0.445891	-0.383393	-0.218554	-0.323405	0.00993409	-0.34226	-0.111547
GCK	-0.14438	-0.0513949	-0.330695	0.37116	-0.0940915	-0.186678	0.176428	0.326149	-0.26847	0.108593	-0.0241025	0.0540531	-0.0226231	0.495471	-0.0600884	-0.0453509	-0.0746257	-0.140239	0.014101	-0.213385	-0.252337	-0.195091	0.111605	0.0771731	-0.0424776	-0.0410745	-0.237283	-0.137028	-0.0691582	0.00796251	-0.0424776	-0.277878	0.146741	-0.0817228	-0.108517	-0.221044	0.0859534	0.133699	-0.243649	0.307549	0.455664	0.252621	-0.366434	-0.388686	-0.1251	-0.304008	0.8054	-0.307227	0.430801
GDA	-0.4472	-0.675278	-0.650356	-0.309471	-0.53955	1.79245	-0.579783	-0.149371	0.359734	-0.112416	-0.418848	-0.623895	-0.522011	1.88482	-0.407509	-0.25937	-0.407431	-0.70018	-0.465916	-0.611348	-0.516669	-0.621475	-0.575191	0.447647	-0.658774	-0.70972	-0.181281	-0.560579	-0.401996	-0.489715	-0.442175	-0.563661	1.02581	-0.25132	-0.30755	-0.17109	1.45478	-0.544682	-0.428806	-0.326895	-0.238091	-0.274383	-0.378523	2.92078	0.753234	-0.450011	-0.22375	-0.460066	2.45137
GEM	-0.583737	1.08796	0.760759	-0.201361	0.315728	-1.89273	1.50935	1.37078	0.642021	0.927827	2.15078	1.23165	-0.338396	0.901577	0.901928	1.89463	0.672137	0.769031	-0.653566	-0.442736	0.441639	0.876574	-0.171652	-1.21016	-0.769021	-0.714568	0.368147	0.92674	0.451081	-1.68558	-0.38735	-0.28242	0.507525	-0.0920244	1.39295	0.958612	0.53707	0.445461	-0.342455	-0.26756	-0.839049	-2.12313	-0.300513	-1.24912	0.304597	0.508983	-0.496633	-0.219594	-1.79631
GGH	-1.48084	-1.7178	-1.23512	-1.10283	-0.446408	0.634393	-1.3768	-0.805097	-1.28735	0.919431	-0.682721	-1.18265	-1.63814	1.16103	-1.51568	-0.866117	-1.32256	-1.56525	-1.22975	-1.00205	-1.30859	-0.848711	-1.27561	1.50329	-0.463996	-1.10927	-0.142372	-0.986293	-1.21171	-1.74637	-1.18825	-1.62128	0.904658	-1.46572	-1.5103	-1.59677	1.25763	-0.949398	0.112837	-2.98119	-1.03072	1.03855	-0.874165	2.35583	1.24555	-1.23284	0.666414	-0.802553	0.244214
GGN	-0.0178318	-0.0143892	-0.282661	-0.0114257	-0.329243	0.0222761	0.0572631	-0.170432	-0.209479	-0.0502582	-0.113688	-0.0131971	-0.125903	0.0156904	-0.067391	0.0318052	-0.147542	0.0860891	-0.112508	-0.0490582	0.0278253	0.0186258	-0.0118625	-0.0983053	-0.150906	0.142773	-0.418138	-0.176673	0.0170521	0.00588314	-0.0529723	-0.0737109	0.0660493	-0.0201866	-0.0545401	-0.179506	0.193955	-0.228279	-0.253481	0.250572	-0.233153	0.343777	-0.306682	-0.16194	-0.169055	0.185643	0.412511	-0.223727	0.225575
GH2	0.0152606	-0.00353922	-0.109242	-0.0393963	-0.29973	0.379687	-0.0661829	0.124123	-0.110332	0.0941821	-0.106	-0.188176	0.0148748	-0.0102963	0.0275813	-0.0189606	-0.0733434	0.109144	-0.0983421	-0.0724185	0.0842923	-0.130465	-0.00256944	-0.057091	-0.0505333	-0.104136	-0.268549	-0.100682	0.0551486	0.200438	0.159274	-0.0752936	-0.0534835	-0.0777403	0.0953541	-0.000458265	0.173925	-0.0834708	-0.12944	-0.0269432	-0.0364125	0.138174	-0.137331	-0.0461726	-0.0345287	-0.0401368	0.169442	-0.0188259	0.0178437
GH1	-0.0734866	0.00860522	-0.0647881	0.259198	-0.132591	0.0401548	0.101666	0.34596	-0.064873	0.0263406	-0.0657356	-0.0876482	0.0150648	0.0347966	-0.0892291	0.0123438	-0.0701638	-0.0798216	0.0049217	-0.264617	0.0436405	-0.0480853	-0.0153643	-0.0604673	-0.0899983	0.00968343	-0.0920427	-0.135745	0.00210759	-0.228841	0.0964007	-0.137052	-0.152966	-0.101617	-0.0709045	-0.205572	0.0999629	0.080017	-0.19733	0.0971717	-0.00406271	0.206004	-0.207649	-0.160191	-0.0950961	-0.0536025	0.157257	-0.108015	0.224346
GHR	1.01583	1.82489	1.7186	0.869081	1.6561	0.275819	0.987019	-0.694546	1.47982	-1.6873	1.01087	1.01685	1.11046	-0.312479	1.63218	1.6083	1.25497	1.01474	0.729272	1.81822	1.23426	1.16813	1.88412	0.877139	1.19232	1.26413	1.82718	1.67054	1.55617	0.628364	0.766163	-0.0845017	-1.3808	1.47525	0.611513	1.23802	1.85058	2.16872	2.05021	0.205473	1.58504	0.195279	0.687228	-1.22373	-1.22125	1.90583	-2.23089	1.00107	-0.419085
GIF	-0.0824253	-0.0291378	-0.0772649	0.0440176	-0.110875	0.186351	0.133019	0.526617	-0.0693089	-0.0637202	-0.0203237	-0.138184	-0.174776	-0.0104973	-0.193302	-0.0706546	0.00760325	-0.0333713	0.110197	-0.0425587	0.227869	-0.153961	-0.0799294	0.203347	-0.145382	-0.20405	-0.258827	-0.166749	0.0931388	-0.314289	0.184734	-0.00349847	-0.196773	-0.0965924	0.337848	0.219112	0.0574118	-0.162163	-0.0664046	-0.0539282	-0.0040684	-0.00904019	-0.109881	-0.120097	-0.0724306	0.0404968	0.465171	-0.219518	0.271072
GIP	-0.163359	-0.164688	-0.0991712	0.235399	-0.260396	-0.0808395	0.450228	0.199139	-0.0672224	0.142228	0.140045	-0.0682663	-0.145558	0.098995	-0.0209427	-0.0209427	-0.0559543	0.504989	-0.0836989	-0.330185	-0.128864	-0.057025	0.0386761	-0.0908859	-0.0682523	-0.253486	-0.434661	-0.204471	-0.0209427	-0.212317	-0.409478	0.00792579	-0.0510332	0.0993732	-0.196582	-0.338059	0.0809373	-0.170714	-0.22048	0.129854	-0.0428859	0.101563	0.0710149	-0.142785	-0.0349239	-0.0784683	0.223199	-0.0121001	0.635274
GK2	0.233245	-0.139147	-0.195077	-0.0619317	0.00223618	0.322265	0.262943	-0.15265	0.000243	0.0194404	0.251718	-0.0316713	-0.223316	-0.0523742	-0.2392	-0.118087	-0.172047	-0.172952	-0.056536	-0.241392	0.385073	-0.123139	0.152317	-0.21287	-0.116743	-0.147675	-0.0719215	0.0755875	0.0111224	-0.0134869	-0.116285	-0.555927	-0.140886	-0.113277	0.253925	-0.0640885	0.178247	-0.201014	-0.280186	0.391008	0.290448	0.117635	0.143377	0.128441	-0.296672	-0.229894	-0.0632901	0.0291342	0.250724
GK5	0.149609	-0.0490459	0.0978841	-0.103562	-0.0663553	-0.0268339	-0.208438	-0.20744	-0.0697226	-0.0596502	-0.0239885	0.0899303	-0.251872	-0.239877	-0.00280295	-0.0951357	-0.203609	-0.0144945	-0.149741	-0.0434201	0.102878	-0.120994	0.0340933	-0.144588	-0.164356	0.00199348	-0.185367	-0.244442	0.12836	-0.121367	0.223598	-0.109692	0.13203	-0.0969689	0.00108762	-0.205937	-0.0166466	0.102149	0.0843013	-0.29397	-0.165817	0.705089	0.467707	0.301381	-0.0150265	0.0177207	0.0944213	0.393491	-0.313613
GLA	-0.498268	-0.138818	0.214829	-0.360304	-0.0546748	0.529359	-0.292601	-0.595045	-0.238311	-0.647861	0.227633	0.689823	-0.420429	-0.141207	0.365271	-0.285613	0.489878	-0.0944762	-0.00591633	-0.291713	-0.739653	0.28131	-0.663712	0.617182	0.278211	-0.0660925	-0.183819	0.150352	0.360592	-0.298914	0.262153	0.279332	0.251574	-0.245903	0.423637	-0.339856	0.145156	-0.704851	-0.0504448	-0.716667	-0.226312	-0.56141	0.495822	0.26342	0.157001	-0.13389	-0.440746	-0.199324	0.176798
GLS	0.472491	-0.00432232	0.142189	0.0657517	0.199287	-0.628107	0.383923	0.0901843	0.00577355	-0.0883353	0.650042	0.702596	0.133863	-0.798152	0.114973	-0.0384096	0.123038	0.0189703	0.403472	-0.152769	-0.0416499	0.498537	-0.0659956	-0.336347	0.237178	0.212994	0.0536537	0.282832	0.205779	0.0805853	0.299931	0.894311	-0.151488	0.258399	0.20833	-0.0318456	-0.731055	0.0561417	0.0962466	-0.0142597	-0.00670446	-0.704965	1.13498	0.362362	0.0672406	0.103697	-1.32488	0.255782	-0.96559
GML	-0.228878	-0.272838	-0.327858	0.119545	-0.22169	-0.0974065	0.382033	0.288207	0.136621	0.417021	0.213347	-0.478499	-0.20871	-0.0243088	-0.0393733	-0.0122934	0.113444	-0.114256	-0.164261	0.12757	-0.042231	-0.304025	-0.412985	0.0424298	0.0200654	-0.745969	-0.0482827	-0.494442	0.272949	-0.15797	-0.219546	-0.152514	0.0164805	-0.191504	0.065881	0.0710592	0.555506	-0.0297302	-0.227967	0.323063	-0.011453	0.127014	0.0615613	-0.0246365	0.209167	-0.128856	-0.130872	0.19667	0.7132
GNE	0.236193	0.224564	-0.116583	0.200279	0.293737	-0.219249	-0.353057	-0.303262	0.668385	-0.176893	-0.463043	0.323283	-0.00844426	0.00935346	0.361302	0.71518	0.515924	-0.184724	0.0316418	0.118529	0.160104	0.198387	0.417978	-0.436109	-0.238139	-0.201863	0.346255	0.241452	0.0991195	-0.100097	-0.368592	-0.0758595	1.37773	-0.049365	0.402038	0.692977	-1.30095	0.74811	0.105139	-0.61597	0.0951926	-0.268051	-0.16615	-0.233975	-0.614361	0.408787	-2.34439	0.0307768	-0.533043
GNN	0.0394451	-0.0246114	-0.262427	0.19784	-0.228656	0.00429696	0.0507367	0.220054	-0.0256375	-0.0245341	0.138726	-0.15165	0.0365938	0.0402419	-0.0625281	-0.167621	-0.111642	-0.154367	0.0916532	-0.168348	0.0558452	-0.0795427	-0.227458	-0.15055	-0.139831	-0.257999	-0.107334	-0.124534	0.21197	-0.0487762	-0.182787	-0.147769	-0.00329861	-0.0897369	-0.0756906	0.144498	0.0876957	-0.0850562	-0.278384	0.129549	-0.0622703	0.358225	-0.0688133	-0.132335	0.0949864	-0.159291	0.308518	-0.0558878	0.190799
GNS	0.221574	-0.128314	0.242866	-0.4243	0.290258	-0.448894	0.553556	-0.424824	0.080589	-0.653022	0.746366	0.216225	-0.181362	-0.306115	0.236361	-0.192279	0.175726	-0.134593	0.616797	-0.332444	-0.362809	0.503458	0.0478845	0.572644	0.051073	0.298501	0.192592	0.277163	0.165775	-0.425696	-0.0977285	-0.0152935	0.526209	0.155606	-0.254355	-0.0970807	0.26967	-0.119214	-0.127611	-0.449958	-0.0962308	-1.76282	-0.276671	-0.549125	-0.916559	-0.167723	-1.71192	-0.122384	-0.534606
GP2	-0.182843	-0.326081	-0.187904	0.0300276	-0.342349	-0.139803	-0.0589764	0.13499	-0.27886	-0.174813	-0.182388	-0.171376	-0.210319	-0.274591	-0.0388301	-0.0511935	-0.191337	-0.0616825	-0.335563	-0.285059	-0.146808	-0.214889	-0.273214	-0.196303	-0.194254	-0.272251	-0.567625	-0.41274	0.133554	-0.25124	-0.214067	-0.110989	-0.253942	-0.10542	-0.204525	-0.154101	-0.0522022	0.209557	-0.289855	-0.0300908	-0.254486	-0.0684278	-0.192512	-0.13568	0.00739201	-0.301896	0.221445	-0.16757	0.206466
GP6	0.0699294	-0.267971	0.0759767	0.129523	-0.246999	-0.0936172	-0.128923	-0.0305047	-0.0211529	0.139283	-0.0734563	-0.211037	0.00591463	-0.240508	0.24267	0.0533843	-0.162017	0.248154	-0.0999491	0.0265049	0.103169	0.046105	-0.218769	-0.123984	0.0922793	0.136685	-0.214715	-0.149178	0.214499	-0.114752	-0.0441027	0.196561	-0.195783	-0.0432542	-0.114945	0.110777	0.477369	0.199748	-0.0514906	0.243527	-0.0797229	0.913638	0.217344	0.0555816	0.284232	-0.123652	0.121151	-0.00568143	0.309385
GP5	-0.0122034	0.0288674	-0.0822248	-0.150061	0.0100457	-0.00610186	-0.0956939	0.0968664	0.151487	-0.0309288	-0.0178763	0.135605	-0.016297	-0.132908	0.0787669	0.0888758	-0.103421	0.0523296	-0.0733651	-0.0317668	0.014546	-0.114546	-0.108879	-0.08096	-0.0146423	-0.0288679	-0.0597457	-0.0116731	0.0336736	0.0465524	-0.15851	-0.196909	-0.0933608	-0.101394	-0.139836	0.253586	0.420225	-0.00351706	-0.0216925	0.0135425	0.0042522	0.0754544	-0.190254	-0.0768298	0.0652338	-0.0811766	0.0117408	-0.0211713	0.252553
GP9	0.0683338	0.0964648	-0.109331	0.345551	-0.276219	-0.116076	0.399665	0.382154	-0.14305	-0.0712228	-0.0535489	0.0121508	-0.293934	-0.0889384	0.00214484	-0.180815	0.0403256	-0.0762489	-0.0111551	0.118715	0.0781853	-0.128891	-0.262325	-0.179485	-0.319369	-0.141984	-0.210122	0.0135556	0.495081	-0.000361	-0.000494	0.0104288	-0.191374	-0.0215628	-0.275622	-0.155073	0.634276	-0.011627	-0.478848	0.113725	-0.0444915	0.184609	0.0983248	-0.274151	0.00906026	0.209404	0.535263	-0.17626	0.394593
GPI	-1.24283	-0.59011	-0.991897	-0.350491	-0.809871	1.39641	-0.444668	0.0429637	-0.738981	0.85635	-0.285312	-0.394336	-0.868572	2.51471	-0.986965	-1.09074	0.160063	-0.598216	-0.409865	-0.523659	-1.57786	-0.719076	-0.722675	1.45266	-0.492886	-0.510834	-0.536294	-0.415274	-2.00964	-1.06811	-0.653399	-0.451235	1.04586	-0.584748	-0.960832	-0.747313	1.53846	-1.34318	-0.744871	-1.29711	-1.2687	2.22529	-1.67446	0.766676	0.289184	-0.614892	1.45398	-1.03702	1.21915
GPT	-0.208642	-0.585121	-0.365793	0.25187	-0.335848	0.592654	-0.140565	0.445168	-0.140799	-0.0102673	-0.454921	0.0448735	-0.0970896	-0.0581213	0.0494833	-0.10147	0.232637	0.0956473	0.0392774	-0.138914	0.476829	0.146167	0.083668	0.0815201	-0.478858	0.139984	-0.174447	-0.480978	0.234206	0.028375	0.255396	-0.190346	-0.260665	-0.0545096	0.188427	-0.148649	-0.356422	-0.120496	-0.0770844	-0.0493321	0.0343059	-0.161845	-0.32034	-0.219378	-0.112249	0.430358	-0.0689567	-0.286384	0.180276
GRN	0.0852846	0.353034	0.353814	0.942663	-0.0213302	-0.265329	0.487404	0.0512233	0.437475	-0.339019	0.72833	0.158324	0.15275	-0.876904	0.618289	-0.440091	0.0495003	0.425596	0.520204	0.816457	-0.380731	0.764193	0.100596	0.609687	0.943001	0.760969	0.232689	0.382141	-0.582542	0.804188	1.11795	0.769508	0.247166	0.618807	0.150538	-0.0821376	-0.763325	-0.311272	0.195698	0.322929	0.509551	-1.11311	-0.388196	-1.3039	-1.05424	0.555128	-1.39568	0.743133	-0.0301196
GRP	0.611568	-1.12719	-0.309586	1.36347	-0.554861	-0.288348	-1.16264	-0.276102	1.02631	2.04979	-0.945484	-0.184842	0.456756	0.400711	-1.05898	0.377571	-0.430675	-1.19296	-0.108928	-0.339141	1.44777	0.468344	-1.15222	-1.10784	-0.631168	-1.28551	-1.00729	-0.795534	-0.868848	0.536958	-1.15578	1.36924	-0.728158	-0.577263	0.268642	0.0921693	0.0566195	1.01663	-1.35946	-0.573504	0.0886215	-0.812747	-0.877001	-0.447397	-1.07014	-0.664101	-1.42439	1.01583	-0.714597
GSC	-0.5842	-0.0463412	-0.474034	-0.130077	-0.567872	-0.0784834	-0.0606027	0.198083	-0.351007	0.288139	-0.0190477	-0.222109	-0.239568	-0.162342	0.00984612	-0.133554	-0.3071	-0.243071	-0.228202	-0.0145136	0.110369	0.0330501	-0.037352	-0.172181	-0.365228	-0.0978418	-0.597284	0.0399225	0.168859	-0.258208	0.0722824	-0.0630445	0.0354536	-0.145059	-0.019541	-0.038913	0.235299	-0.32071	-0.343203	0.183721	-0.0145136	0.111772	-0.211092	-0.13644	-0.030934	-0.0470628	0.474875	-0.183829	0.965587
GSN	0.0536603	-0.0557884	0.0232225	0.0648587	-0.253971	-0.16222	0.245078	0.132747	-0.0559635	-0.0556661	0.595785	-0.104583	-0.0812422	-0.0841422	0.142364	0.0124151	0.00115955	0.183255	0.165685	-0.106937	0.157372	0.208519	0.289172	0.0598734	0.029358	0.565581	-0.271097	-0.0435686	0.0243426	-0.17262	0.355561	0.619305	0.0130438	0.0346793	0.432469	-0.00656172	0.123701	0.104321	-0.0670043	0.17938	0.101938	-0.107408	0.0136032	-0.105641	-0.0868071	0.363641	0.121845	-0.29365	0.0904591
GSS	-0.783186	-0.550655	-0.451545	-0.363635	-0.502265	1.09048	-0.381378	-0.0815153	-0.48021	-0.322954	-0.32249	-0.214133	-0.43539	0.261549	-0.204081	-0.339356	-0.306626	-0.257018	-0.266102	0.153252	-0.83738	-0.547055	-0.250781	0.272083	-0.0891936	-0.039808	-0.240361	-0.475583	-1.02044	-0.0905822	-0.228501	-0.0506353	0.216039	-0.465301	-0.379165	-0.544454	0.306789	-0.242413	-0.308041	-0.589681	-0.32666	0.763717	-0.598216	0.198747	-0.0258087	-0.201333	0.469867	-0.54245	0.852509
GSR	-0.25291	-0.742657	-0.312118	-0.370701	-0.318985	1.85224	-0.171932	-0.448264	-0.17329	-0.9343	0.279691	0.144301	-0.532696	0.325232	-0.438695	-0.749357	-0.624343	-0.370875	0.0962007	-0.177306	-0.414437	-0.0317956	-0.270382	0.545714	0.0674547	-0.0347795	-0.0942159	-0.331308	-0.510573	-0.325012	0.087049	0.906114	0.412219	-0.39602	0.186356	-0.361666	0.305364	-0.662089	-0.17524	-0.991883	-0.158546	-0.313235	0.268457	0.709989	0.445974	-0.22145	1.60313	-0.340135	1.55641
HAL	0.0054628	0.196247	-0.149391	-0.0409014	-0.182787	-0.0722459	-0.12014	-0.445263	-0.309013	-0.441684	-0.0786925	0.510903	-0.140596	-0.626479	0.368036	0.0110502	-0.0418067	-0.0954407	-0.0935452	-0.182378	-0.0135218	0.324124	0.144152	-0.620668	0.0690255	-0.368841	-0.0752296	-0.162521	0.951395	0.126344	0.153112	0.000736	-0.385264	-0.380992	0.0209864	-0.222774	-0.108989	-0.159192	0.0805384	0.134687	-0.104343	-0.182816	-0.262354	-0.0866944	-0.507813	-0.0108298	0.126352	0.0128499	-0.419899
HBB	0.517021	2.32331	2.16104	2.01823	1.62789	0.186589	2.60825	0.971165	1.55449	-1.14505	2.66218	2.54142	1.027	-0.404756	2.63245	2.25096	2.30617	2.10853	1.4152	-0.364705	1.12629	2.54384	1.95541	-1.16645	2.10742	1.15149	-0.0265393	2.53865	2.90404	0.83254	1.59106	1.45935	-1.34419	1.81513	2.61348	2.58144	-2.56056	1.62525	1.59423	2.25135	1.47791	-5.88814	2.4116	-4.52436	0.430225	0.993714	-2.58144	1.39877	0.0532621
HBD	-0.462812	1.3103	0.128591	0.513603	0.0283767	-0.424457	0.955787	0.266454	0.151388	-0.356211	1.11256	1.9618	-0.134336	-0.554056	2.98018	0.411054	0.511512	0.307379	-0.0233102	-0.387256	0.357903	1.03916	0.289665	-0.734306	0.162	0.0482686	-0.275885	1.32375	1.46304	-0.37169	0.100916	0.451159	-0.471104	0.465226	1.99372	0.823656	-0.234359	0.388129	-0.118559	0.803132	0.278185	-0.375734	0.0203083	-0.612297	0.527109	0.0927284	-0.360497	0.383402	0.492072
HBM	-0.17279	0.102691	0.300781	0.0929137	-0.314583	-0.333989	0.553393	-0.0568339	0.240761	-0.338903	0.364079	0.824508	-0.190529	-0.397581	1.20448	0.0313509	0.114703	-0.129595	-0.0883131	-0.093378	-0.160352	0.453265	0.460201	-0.190692	0.144336	-0.2803	-0.21682	0.406095	1.52866	-0.0461443	0.475448	-0.0140748	-0.378417	0.307263	1.76984	0.909784	0.140095	-0.0747227	-0.460523	-0.0846096	-0.0203069	-0.088202	0.152517	-0.130253	-0.37713	0.118091	0.667559	0.137796	0.0382584
HBZ	0.422849	0.00366097	0.00379903	0.052236	-0.562645	0.291456	-0.163026	0.203729	-0.0429864	-0.455695	-0.216704	0.0424685	-0.0484499	-0.472392	0.0980149	-0.0880343	-0.120302	0.156972	0.0534816	0.320783	0.0772627	0.098257	0.345936	0.108126	0.269832	-0.0032602	-0.249851	-0.0219576	0.399962	0.0809933	0.307885	0.0310504	-0.128179	0.00318045	0.268336	-0.0224581	0.530197	0.244158	-0.353094	0.430121	0.431014	0.353124	-0.637422	-0.0736435	-0.256961	0.115734	0.372056	-0.267422	0.597087
HCK	-0.0164858	0.790394	0.708593	0.849321	0.769766	-0.476049	0.953474	0.563111	0.491957	-0.857342	0.492153	1.42433	0.98232	0.372549	1.64167	-0.0944106	1.17825	0.879331	1.12246	1.19611	0.385365	0.692142	0.491559	0.796012	1.14238	1.13264	0.811043	0.620729	0.608419	1.26792	1.40845	0.569588	0.572048	1.31776	0.42487	0.373159	0.535926	0.0427343	0.947346	0.651943	0.499016	-1.76798	0.46296	-2.12619	-0.829265	1.23443	-0.517674	0.365867	0.495799
HDC	0.181675	0.807136	1.38307	0.423254	0.188704	-0.2937	0.486042	0.694947	-0.100956	-0.143263	0.140058	0.542341	0.953243	-0.64285	0.707878	1.4937	1.8683	0.619201	0.714522	0.523132	0.63567	0.137943	0.426731	-0.256686	0.22188	0.482299	1.3236	1.1182	0.375523	-0.180204	0.298311	-0.186876	0.073839	0.789114	0.595197	0.0803473	-0.425854	0.321408	0.134867	0.306493	0.645573	-0.223896	-0.227181	-0.924376	-0.110945	1.60269	-0.100308	0.541767	-0.533337
HDX	-0.133142	-0.317037	0.0782979	-0.0603559	0.499334	0.146417	-0.193107	-0.171948	-0.0998367	-0.120647	0.034762	0.287276	-0.253805	0.0860062	0.19318	0.332644	0.635316	0.2584	0.0437512	-0.105308	0.282122	-0.245335	-0.00574497	-0.13574	0.00185171	-0.17777	0.325841	-0.0267323	0.36075	0.20997	0.0869107	-0.438772	-0.474296	0.207832	0.0460765	0.0104916	-0.159759	0.237953	0.0561649	-0.351833	0.0544636	-0.326661	0.195753	-0.431597	-0.34957	-0.112175	-0.397633	0.00854231	-0.334662
HFE	0.0817799	-0.607588	-0.278844	-0.0179398	-0.196885	0.0881935	0.0341153	0.283637	-0.0813835	0.155669	0.100867	0.0822052	-0.185449	-0.339984	-0.0360464	-0.125166	-0.289947	-0.314133	-0.00556649	-0.217883	-0.0525125	0.0239265	0.0642815	0.115937	-0.39979	0.0670416	-0.108579	-0.122808	-0.132159	-0.0524449	0.0109303	-0.0704028	0.0486797	0.0297565	-0.103389	-0.173592	0.114943	-0.141623	-0.249024	0.137786	0.00572996	0.234913	-0.0156567	0.0369636	-0.102524	-0.11308	-0.176647	-0.394453	-0.100454
HGD	-0.451023	-0.298487	-0.19091	-0.393238	-0.275133	-0.0905715	-0.15928	-0.312422	-0.197865	-0.306655	-0.313548	-0.0795675	-0.428385	-0.419144	-0.180972	-0.22287	-0.411185	-0.139069	-0.387508	-0.308015	-0.488612	-0.342827	-0.126474	-0.520334	-0.218601	-0.491195	-0.322545	-0.281609	-0.0937535	-0.490951	-0.401632	-0.220849	-0.442031	-0.195369	-0.127569	-0.0715843	-0.323782	-0.241902	-0.464246	-0.273331	-0.15208	-0.258227	-0.275236	-0.251932	-0.128909	-0.364814	-0.111251	-0.209143	0.00891956
HGF	-0.213842	-0.150319	0.753656	-0.368285	0.218018	-0.228891	0.272843	-0.001581	-0.232455	-0.159704	0.681847	1.19069	-0.0154387	-0.239807	0.480489	0.564404	0.780007	0.156965	0.0406227	0.0513599	0.25237	0.0640966	0.0560923	-0.405858	0.0366961	0.57708	0.978482	-0.181806	0.705255	0.16907	0.107698	-0.44754	-0.215991	-0.154235	0.404658	-0.0593221	-0.543062	-0.21109	0.243935	-0.248312	-0.0928192	-0.566955	-0.2444	-0.820683	-0.0850057	0.170705	-0.373862	-0.279555	-0.309256
HGS	-0.329841	-0.342165	-0.498554	0.081187	-0.634761	0.658769	-0.284694	-0.273361	-0.602608	0.170606	-0.55642	-0.158947	-0.161175	-0.343241	-0.313392	-0.375872	0.244357	-0.0770499	-0.228775	0.0290251	0.0929272	-0.152211	0.0915535	-0.00320372	-0.374336	0.0266095	-0.516439	-0.417657	-0.111848	0.260086	0.440758	0.181868	-0.122682	-0.00486926	-0.150875	-0.430351	0.171436	-0.32529	-0.45444	0.302453	-0.0431931	0.208386	-0.478985	0.0684565	-0.486298	-0.0649787	0.0401104	-0.356082	0.424479
HK2	0.00716006	0.390725	0.179298	0.477126	0.948828	1.24305	0.4015	0.107222	0.371453	0.286004	0.475425	0.429125	0.486906	1.13416	0.343401	-0.800979	-0.2072	-0.0901189	0.695303	-0.136341	-0.475576	-0.322147	-0.338446	0.26895	0.610228	-0.260016	0.204377	0.165713	-1.32601	-0.119767	0.157277	0.787457	0.450086	-0.0692916	0.091301	-0.767997	0.838855	-0.424971	0.701896	-1.13804	-0.334634	0.853093	0.43329	1.49507	0.949288	-0.0649174	1.70937	0.179339	0.159934
HK1	-0.238441	0.0317749	-0.134866	0.000109	-0.218493	0.480072	0.174154	-0.102297	-0.156616	0.534006	-0.214963	0.15762	-0.060755	0.754113	0.27624	-0.11351	0.244411	0.0407643	0.120851	0.210783	-0.205916	-0.196614	-0.198144	0.905796	0.0872915	0.301566	-0.0645087	-0.0703192	0.0576549	0.443366	0.117328	0.0416398	0.260629	0.00898486	0.0572096	-0.138924	0.265711	-0.267797	-0.050022	0.148346	-0.0338689	0.159859	-0.407868	0.190346	-0.220597	0.252822	0.149942	-0.0359976	1.59627
HK3	-0.329424	0.860946	0.0565491	0.957155	1.16428	-0.663287	0.905756	-0.375038	0.512301	-1.34662	0.756177	1.0926	0.903967	-1.75716	1.45467	0.0303339	0.75948	1.01575	1.53378	0.916377	0.392445	0.432661	0.729682	0.211879	1.18746	0.963717	1.29025	0.361851	0.593923	1.3251	1.88004	1.48208	0.185518	0.946276	1.20501	0.100045	-1.17148	0.22714	0.738315	0.604117	1.19056	-1.39724	0.633132	-1.63455	-0.81448	1.12887	-1.22941	0.750689	0.0683645
HLF	0.923448	2.07691	1.38856	0.54199	1.83822	-1.56492	1.17072	-0.225817	1.25474	-1.55065	0.824976	1.36393	1.66403	1.69179	1.18345	1.45973	0.735092	1.71406	1.85017	1.39772	0.774362	1.57795	1.62657	0.0375254	1.69705	1.08071	1.14447	1.76091	0.400233	1.29597	0.744273	1.43605	-0.319946	1.24718	0.996478	0.387375	-1.38018	1.48338	2.06069	0.123213	1.52693	-1.33397	0.999662	1.61378	-0.279932	1.04742	-0.819411	1.59437	-0.771436
HLX	1.36828	1.31001	1.21832	0.748774	1.53832	-0.0427509	0.469214	-0.58781	1.04491	-0.440503	1.12139	0.784434	1.15857	-0.759742	0.634317	0.507236	0.801744	0.869014	0.364979	1.57307	0.389202	-0.506299	0.147222	-0.127431	1.40616	-0.0696227	0.48993	0.191113	0.587864	1.33437	0.552835	-0.140468	-0.462126	0.677558	0.744849	0.817458	-0.00894748	0.87114	0.656515	1.56084	0.639348	-1.1857	0.513642	-1.32755	-0.181583	0.894376	-0.662186	0.40799	-0.535572
HN1	-1.05374	-0.76768	-0.769128	-0.656453	-0.657331	0.814598	-0.477034	-0.519288	-0.92696	-0.0605046	-0.80412	-0.709694	-0.614879	0.285252	-0.33345	-1.2142	-0.750467	-0.615687	-0.28655	-0.328507	-1.23726	-0.898617	-0.67358	0.454876	-0.243917	-0.778357	0.0458417	-0.61759	-1.31777	-0.601044	-0.269574	-1.01733	0.363687	-0.797952	-0.654391	-0.773791	0.760482	-1.18841	-0.482589	-1.16138	-0.634841	0.984735	-1.09133	0.806275	0.00393991	-0.449465	0.260893	-1.21399	0.67654
HPD	-0.16907	0.2523	-0.416968	-0.189556	-0.0389054	-0.284895	0.106475	0.168529	-0.038083	-0.244321	-0.0336629	0.0584811	0.0629212	-0.080907	-0.112381	-0.0677238	0.0849113	-0.0526111	0.00696164	-0.109095	-0.125961	-0.109504	0.0294685	0.00399941	0.0737727	-0.0625619	-0.038083	0.0213299	0.183928	-0.357786	0.0861874	-0.0244457	-0.24905	-0.0222866	-0.201918	-0.355605	0.136416	-0.132172	0.0118666	0.136569	-0.247753	0.0198089	-0.389363	-0.246789	0.0692243	-0.12883	0.330972	-0.0891543	0.147999
HPN	-0.0491233	0.246102	0.510049	0.973177	0.00602359	-0.540667	-0.104976	0.000904	-0.569779	-0.8015	0.750362	0.122515	-0.0531831	-1.16129	0.111188	-0.0500932	0.00401135	-0.0200675	0.481079	0.832819	-0.611875	0.435317	0.646161	-1.14035	-0.207835	0.0150224	0.257641	0.29212	-0.505681	0.492284	0.405635	1.2273	-0.915881	0.526844	-0.334234	-0.62544	-0.699838	-0.390378	-0.43079	-0.328676	0.632012	-0.80575	-0.50102	-1.18964	-1.28161	0.0599687	-0.727085	0.147593	-1.08841
HPR	0.0705538	0.106986	0.258908	0.186662	-0.0796546	0.0651616	0.469231	1.35108	0.15436	-0.276367	0.0166866	0.101412	-0.181306	-0.206956	-0.11992	-0.177775	0.139718	0.0930281	0.0794572	0.0165373	0.313887	0.855193	-0.113271	-0.11159	0.0189064	-0.276692	-0.0125751	-0.0209525	-0.0761131	0.284533	0.128304	0.0428378	-0.132586	0.144759	0.708436	-0.223655	-0.110507	0.454124	0.201458	0.043884	0.366199	-0.171063	0.153252	-0.678973	-0.221938	0.065036	-0.149327	-0.100574	-0.244051
HPX	0.271418	-0.360107	-0.359248	0.103986	-0.560932	-0.0261132	0.158438	0.713945	-0.12565	0.0762406	0.119631	-0.271439	0.0058011	-0.230636	-0.260753	-0.15376	-0.27597	-0.624213	-0.395232	-0.295702	0.0245458	-0.37266	-0.670032	-0.0946067	-0.286952	-0.489909	-0.432292	-0.340709	0.21562	-0.082886	-0.185093	-0.257234	-0.103526	-0.203638	-0.376332	-0.249385	0.125	-0.204591	-0.598607	0.3481	-0.187931	0.0774055	-0.213593	-0.582281	-0.00827332	-0.435501	0.278971	-0.155289	0.232696
HRC	-0.00188541	0.0529734	0.0419938	0.0653346	-0.173739	0.120867	-0.0777012	0.0592149	-0.135639	-0.423302	-0.0936133	-0.032231	-0.0508114	-0.430347	0.33909	-0.191623	-0.139044	-0.147052	0.175695	0.0758372	0.112571	0.376358	-0.179793	-0.199782	-0.191088	0.0739179	0.0653607	-0.0426263	-0.0996045	0.0797747	0.116983	-0.24291	-0.628614	-0.0406888	-0.0643584	0.0126747	-0.00369893	0.123969	0.0467833	0.22459	0.291639	0.197551	-0.252934	-0.417717	-0.14564	0.0906598	-0.12511	-0.01708	-0.076124
HRG	-0.137985	-0.27936	-0.155492	0.22619	-0.329247	0.257918	0.0773271	0.257009	-0.222067	0.0390862	-0.0558094	-0.271058	-0.194952	0.364646	-0.153267	0.0466278	-0.142156	0.0803721	-0.0433212	-0.0178637	-0.222862	-0.14007	-0.20081	0.0114037	-0.0745131	-0.402111	-0.394009	-0.241334	0.206404	-0.282644	-0.218143	-0.134969	-0.175958	-0.00418045	-0.16917	-0.0192456	0.101523	-0.10004	-0.268242	0.180939	-0.203176	0.279943	0.0298901	0.470785	0.0195472	-0.296499	0.706126	-0.0459556	0.552234
HRK	-0.150393	-0.420856	-0.0201282	-0.192756	-0.303447	1.12833	-0.280612	0.0203908	0.235144	-0.253121	-0.286227	0.0675967	-0.103164	0.104684	0.193384	0.147774	-0.0771076	-0.0162386	-0.10769	-0.053702	-0.181303	-0.0371882	-0.188205	-0.146136	-0.224762	-0.509213	-0.334047	-0.140937	-0.0771076	-0.157261	-0.252007	0.0223026	0.374955	-0.330885	-0.366695	0.254196	0.135058	-0.309623	-0.381797	0.340576	-0.252397	0.443146	-0.253809	-0.39123	-0.146556	-0.363239	0.264879	-0.223838	0.0211438
HTT	0.138373	0.0853478	0.204075	0.196091	-0.0310672	0.251109	0.163935	-0.337382	-0.111741	-0.317828	0.0243244	-0.143549	0.193253	-0.554019	0.352091	0.0390486	-0.0270577	0.129811	0.210537	0.753496	-0.0550649	0.167949	0.669164	-0.37443	0.430789	0.544794	0.26561	0.130495	-0.107202	0.834433	0.611651	0.576557	-0.168954	0.372008	0.260179	0.176156	-0.631503	-0.0766376	0.18381	0.645609	0.554098	-0.685074	0.130694	-0.830728	-0.361944	0.597247	-0.471707	0.354652	0.464408
HYI	-0.0721168	0.47236	0.168187	0.512585	0.160878	-0.771213	0.271168	0.270135	0.31025	0.100481	-0.314013	0.327685	0.277704	-0.514356	0.196055	0.151889	0.243365	0.149284	-0.00787384	0.725008	-0.103181	0.485512	0.439712	-0.046652	0.270909	0.183805	0.355916	0.521328	-0.480185	0.532038	0.308309	0.33859	-0.414127	0.334152	0.154725	0.147114	-0.267486	0.309169	0.108224	0.431763	0.534809	-0.864196	-0.625605	-1.40384	-0.462701	0.229782	-0.526518	0.1035	0.473535
AHCYL2	0.67451	-0.00170003	0.661931	0.300342	0.773608	-1.13104	1.00158	0.559584	0.0941329	-0.903865	1.00427	1.16482	0.334795	-0.957629	0.705738	0.457309	0.287193	0.508219	0.913836	0.241591	0.291766	1.22697	0.599274	-1.23877	-0.0637618	0.387381	0.0279653	0.477112	0.0629206	0.21341	0.803075	1.33763	-0.480588	0.757492	0.995589	-0.0307452	-1.07839	0.240654	0.0431541	0.0664168	0.450471	-1.41313	1.15712	-1.22748	-0.919273	0.250626	-0.990325	0.48696	-1.55709
AHCYL1	-0.0698886	0.128931	0.0803621	0.00549763	0.0754319	0.0244711	-0.0344925	-0.0315233	0.11439	-0.0868862	0.255105	0.0785964	0.099467	-0.2001	0.117554	-0.062065	0.0284219	0.186838	-0.0265914	-0.0441475	0.401059	0.0778383	-0.0543219	-0.331622	0.297775	-0.0512424	-0.12264	-0.0862158	-0.0826559	0.0707556	-0.184473	0.46605	-0.291615	-0.00482757	0.05905	-0.123317	-0.425283	0.052169	-0.0325983	0.00889471	-0.0187989	-0.752473	0.257963	-0.264916	-0.00620319	-0.0469208	-0.774252	0.205674	-0.332323
ICK	0.0662043	-0.079948	0.128225	-0.0493386	0.121248	0.107372	0.00400918	-0.107897	0.089134	0.0747876	-0.0433029	-0.127489	-0.0914922	0.715441	0.0811549	-0.0759421	-0.274382	0.0428359	-0.097725	-0.0858131	0.0554417	-0.0157806	-0.0687994	0.14705	-0.123876	-0.142291	0.0538261	-0.00840366	-0.213625	-0.191758	-0.195883	0.211863	-0.244364	0.0598149	-0.192649	-0.0287708	0.271795	0.16271	0.0492443	-0.230899	-0.0543185	0.783412	0.105068	0.856941	0.169571	-0.106908	0.472669	0.279238	0.240818
ID2	0.594552	0.871519	0.38466	0.258918	0.0278087	-1.04222	-0.150029	-0.310763	-0.0186381	-0.356295	-0.0903622	0.724948	0.0834718	-0.555165	0.564472	0.712467	0.568707	0.423131	0.216032	0.773247	0.837594	0.6956	0.227302	-0.885989	0.117408	-0.0643206	-0.0218897	0.397493	1.30752	0.26552	0.452842	0.0294699	0.00350364	0.781558	0.338939	0.29215	-0.705377	0.799328	0.50399	0.484332	0.173564	-1.66635	0.409856	-0.81908	-0.168154	0.611566	-1.89599	0.564265	-1.29976
ID1	0.852198	1.33487	0.86929	1.25271	0.431021	0.28913	0.889825	-1.60659	1.05743	1.31411	0.995448	0.97977	0.342498	-0.17899	-0.179567	0.747091	-0.381179	1.54014	0.701154	0.67637	-0.263546	0.704086	0.695033	-0.579815	-0.0901623	-0.425308	1.03554	0.713241	-0.263216	1.21949	0.680526	0.392088	0.251192	1.6126	-0.509158	0.854949	0.804561	0.0544341	0.616727	-0.120926	-0.230292	-4.1465	0.364696	0.211572	-0.583602	1.65942	-1.92976	0.446081	-0.484231
ID4	0.762427	1.27139	0.967169	0.415176	1.48243	-0.9301	0.394475	-0.775827	1.04901	-0.652096	0.963493	0.150766	0.819596	-0.112419	0.202935	0.620147	0.742583	1.305	1.03862	0.828385	0.854708	0.831283	0.544618	-1.73282	1.01488	0.264849	0.439749	0.674943	0.35758	0.911096	0.210744	0.792075	-0.542463	0.024056	0.0377986	-0.0180843	-0.867018	0.400442	1.95392	0.831233	1.1266	-2.0106	1.41485	-0.268046	0.00310155	0.412966	0.38568	1.38572	-0.910177
ID3	0.156856	0.935308	0.467187	0.806008	0.197351	-0.937423	0.461061	-0.704456	0.703056	0.726144	0.842608	-0.679259	0.337034	0.118338	0.803701	1.10584	-0.368166	0.606463	0.517286	1.19461	0.144346	-3.28e-05	0.308402	-0.42754	0.11262	0.085003	0.742823	0.118805	0.0838436	1.38305	-0.748372	-0.04097	0.788923	1.07003	-0.814922	0.24206	0.336741	0.941272	0.831255	0.39426	-0.312161	-2.09566	-0.287915	-1.80748	-0.283982	0.969188	0.450384	0.554418	-0.738722
IDE	-0.378736	-0.257181	-0.142429	-0.714164	-0.225796	-0.0199613	0.0345789	-0.048812	-0.219026	0.025502	0.0608505	-0.154278	-0.537794	0.897737	-0.0362719	-0.288031	-0.411276	-0.672747	0.12797	-0.825851	-0.497808	-0.368485	-0.925235	0.312104	-0.324183	-0.298329	-0.117132	-0.195201	-1.03993	-0.512339	-0.573431	-0.223651	0.294009	-0.305507	-0.0958288	-0.40637	0.410114	-0.574984	-0.30663	-0.720277	-0.780475	0.278141	0.213722	1.07938	0.274925	-0.541178	-0.315708	-0.10263	-0.144331
IDS	0.156273	0.240692	0.123749	-0.119915	0.0435681	-0.152279	-0.0214987	-0.417047	0.173211	-0.299451	-0.0116838	0.16026	0.160095	0.344952	0.148862	-0.0177338	0.186138	-0.0378533	0.102418	0.192003	0.127201	0.391936	0.365449	0.0745266	0.171869	0.256138	0.430236	0.0469975	0.152834	0.144162	0.18867	-0.0250679	-0.297524	-0.0499101	0.191182	0.00665526	0.221387	-0.131027	0.13417	0.435821	0.164279	-0.613595	0.195649	0.0867337	-0.199932	0.296789	-0.0977302	0.0988273	-0.10851
IGH	-0.443255	-0.341685	-0.298531	0.0779409	-0.469309	0.0604038	0.15504	0.592226	-0.441389	0.161561	-0.326574	-0.075295	-0.109947	0.0326827	-0.251095	-0.103839	0.0504416	0.100573	-0.239888	-0.131304	-0.207767	-0.0438113	-0.190482	0.287154	-0.200103	-0.139733	-0.303496	-0.288991	0.0690136	-0.231647	-0.0651756	0.0965248	-0.0539881	0.00843297	-0.246473	-0.352897	0.356271	-0.099322	-0.334747	0.111012	-0.271355	0.303496	-0.231938	-0.466431	0.42514	-0.211839	0.615742	-0.273734	0.206711
IGK	-0.798277	-0.950048	-1.60132	-1.11914	-0.906581	-0.119561	-1.04154	2.17814	-0.806827	2.79929	-2.08298	-1.40135	-1.01175	1.35255	-0.673355	-0.843236	-0.0720015	-1.58273	-0.457008	-0.967841	-1.8124	0.488747	-0.959434	2.52194	-0.627431	-1.20928	-1.37233	-0.998777	-1.47082	-0.963801	-0.999153	-1.06488	2.77822	-0.805465	-1.66608	-0.949972	1.8957	-1.05638	-1.31814	-1.62134	-1.1923	-0.599489	-1.36753	-1.13606	0.219014	-0.792628	0.377086	-1.89667	2.66389
IGJ	-0.112965	-0.158679	-0.0300575	0.987974	1.02102	-1.34242	0.713812	2.03767	0.482065	0.921097	-0.980413	-0.145135	0.301214	0.464993	1.19273	0.595489	1.36618	-0.407465	0.263282	0.790699	-0.653088	1.17092	0.0676625	1.17748	0.0691276	-1.10702	1.24059	0.862997	-1.53342	0.0278351	-1.05863	-0.807916	0.899464	1.05824	-1.34215	0.490657	0.620323	1.0126	1.12806	-1.29197	-0.897783	-1.16524	-0.754659	0.824832	1.66515	-0.428345	-0.693455	1.26765	-0.719406
IHH	-0.00296218	0.16228	-0.251696	0.0237425	-0.168929	0.0670142	0.372551	0.308079	-0.149737	-0.319613	0.0296069	-0.235045	0.16105	-0.0989185	-0.00758543	-0.184617	-0.249772	0.284821	-0.444137	0.181191	-0.285204	-0.084095	-0.350245	-0.265081	0.0569688	-0.113926	-0.258199	-0.381888	0.250629	0.0446592	-0.0327261	0.0610618	-0.165026	0.349661	-0.128431	0.146333	0.410176	0.0584204	-0.292546	0.295662	-0.0617282	0.0377383	0.0992678	-0.331947	-0.0858459	-0.236699	0.747367	-0.00980779	0.224374
IL2	-0.109442	-0.0857932	-0.0549145	-0.103022	-0.119666	0.26368	0.0356869	0.0298266	-0.203993	0.00846638	-0.101615	-0.0233253	-0.222051	-0.000683	0.0168164	-0.0668521	-0.12247	0.0497733	-0.0618743	-0.115075	0.0829416	-0.181557	0.291525	0.0597016	-0.129366	-0.16808	0.092907	0.195717	-0.0710443	-0.166579	0.0889143	-0.0712263	-0.0332051	-0.125603	-0.0953473	-0.165782	0.256299	-0.177662	-0.0950733	-0.03638	0.11566	-0.102233	-0.0681882	0.0536304	0.118532	0.201073	-0.0290529	-0.066993	-0.0354843
IL4	-0.13385	-0.0549235	-0.10563	-0.0283756	-0.219593	0.175564	-0.0187861	0.082729	-0.0135931	-0.0554807	0.0589839	-0.0882136	-0.210073	-0.246694	0.00434156	-0.0821813	-0.105168	-0.102128	0.0404295	-0.179165	0.206048	-0.0780443	0.000547151	0.0664744	-0.0965625	-0.0348495	-0.196842	-0.158056	0.0215518	0.0335875	-0.153512	-0.220307	-0.0733895	-0.0147733	0.021817	-0.0829271	0.0306902	-0.0453976	-0.276697	0.285976	-0.057829	0.472499	0.0009125	-0.0264909	-0.0749169	-0.118586	0.403325	0.0215802	0.31653
IL3	-0.284124	0.100731	-0.0848058	0.272802	-0.228678	-0.210857	0.0870083	0.247996	-0.1963	0.166155	0.0389723	0.0611562	-0.118946	-0.199395	0.164826	0.22062	-0.0585302	0.12952	-0.191184	-0.0247622	-0.219624	-0.121834	0.171198	-0.162452	-0.260358	-0.257682	0.0622669	0.0747081	0.242095	-0.104174	-0.313765	-0.0882754	-0.0943841	0.0358388	-0.293114	-0.156229	0.365439	-0.165485	0.00894682	-0.0405163	-0.146619	0.426026	0.0119796	-0.101913	-0.0894219	-0.220169	0.450864	-0.0828273	0.163699
IL6	0.0396909	3.67288	-1.37075	2.235	1.30166	-0.846531	0.96998	-1.48127	-1.81331	1.54441	0.908695	5.03417	1.46267	-0.876198	3.26386	3.95696	2.85183	2.59055	1.10477	0.222292	2.30247	3.91994	2.67143	-3.17888	1.76441	0.450525	1.60718	2.08131	5.35824	-0.186503	3.1291	0.390159	0.984942	0.239184	4.41394	2.47904	1.10602	-2.14377	1.30887	-0.508991	-1.98435	-3.41939	1.20545	-2.48342	-1.97867	2.2372	0.160169	2.36097	-0.566225
IL5	-0.135649	0.432654	-0.0574871	0.0892035	-0.307277	0.113246	-0.0412183	0.542438	-0.207136	-0.0751534	-0.0654397	0.325565	0.0172098	0.312839	0.00277667	-0.0450741	1.05633	-0.266263	-0.267773	-0.0253302	-0.01253	-0.104715	-0.0207251	0.0859041	0.0164388	-0.0163353	-0.00154462	0.122584	0.0261109	-0.237203	0.204697	0.017764	-0.0584488	-0.0145311	0.0399235	0.0277171	0.305386	-0.0525456	-0.273413	-0.15683	-0.202733	0.23894	-0.0203601	-0.0194125	0.157225	-0.048854	0.395496	-0.205606	0.148387
IL7	1.55978	1.53982	1.27082	1.19492	1.32811	-1.57843	0.0109126	1.1575	2.09066	-1.62116	0.0953458	0.673401	1.86341	-0.82757	0.998796	0.836732	1.05053	0.223913	0.490472	0.87121	0.86593	-0.064888	-0.0440408	1.10742	1.61978	-0.479927	0.290211	1.03038	-0.492717	0.0391247	-0.637473	-0.194597	0.833667	0.83417	-0.473564	0.441173	-0.767538	0.139903	1.24453	-0.39035	0.474235	0.785793	0.470867	-0.706245	0.487972	0.51153	-2.20836	0.563236	-0.623874
IL9	-0.0488501	0.0860848	0.0650261	0.0183465	-0.00537289	0.150898	0.23596	-0.0560236	-0.0576934	-0.0796859	-0.0129286	0.131812	-0.135725	-0.0818232	-0.00537289	-0.00953387	-0.179194	-0.116559	0.158714	0.0033131	0.0828372	-0.173932	0.00277259	-0.0715477	-0.0281884	0.119842	-0.13903	0.0517788	0.0688308	0.0604255	-0.00747404	0.143574	0.027397	-0.0996852	-0.15674	-0.00537289	-0.107514	0.0268743	-0.0124667	0.178264	-0.0119598	0.0354733	-0.115995	-0.232527	-0.0298892	-0.156321	-0.0904912	-0.113829	-0.162357
ILK	0.0476177	0.000248	0.325577	0.565291	-0.0902147	-0.46596	0.482972	0.122647	-0.00573682	0.428236	0.330672	0.392328	-0.225544	-0.835337	-0.0787024	0.212067	0.306467	0.355046	0.236313	0.740764	0.267303	0.215823	0.278817	-0.480442	0.284536	0.394929	0.0742324	0.276361	0.226493	0.798665	0.612147	0.32529	-0.14955	0.455696	0.254014	0.0929255	-0.449131	0.467639	-0.095518	0.453636	0.0451872	-0.688661	-0.406481	-2.0542	-0.945678	0.352826	-1.01354	-0.055049	-0.0992492
INA	-0.788494	-0.941988	-0.757896	-0.413849	-0.985578	-0.705129	-0.930148	-0.564854	-0.891182	0.0551298	-0.838685	-0.80502	-0.88126	1.69765	-0.31524	-0.779845	-0.757002	-0.93427	-0.739584	-0.813048	-0.786301	-0.978193	-1.12246	-0.476569	-0.797491	-0.877985	-0.896965	-0.896965	-0.496119	-0.824295	-0.797699	-0.929944	-0.401624	-0.778565	-1.00626	-0.391253	-0.981966	-0.89592	-0.960855	-0.650256	-0.750011	0.207764	-0.735754	-0.616181	-0.817965	-0.673807	0.410817	-0.796106	0.065344
INS	-0.177608	-0.217254	-0.0132118	-0.401495	-0.182831	0.257825	0.15367	0.205977	-0.2557	-0.0769953	-0.116819	0.139964	-0.00893473	0.119131	0.0137483	-0.1372	0.0532048	0.0997162	-0.224903	-0.140735	-0.375702	-0.133731	-0.0315183	0.261954	-0.157554	-0.049135	-0.203154	0.0589618	0.169971	-0.010657	-0.0607641	-0.00330278	-0.270724	0.0707165	0.168461	-0.0655022	0.242205	-0.00380088	-0.386036	0.264826	-0.119718	0.247478	-0.180228	0.0775826	-0.22772	-0.0615838	0.825887	-0.0885899	0.589183
IPP	0.129082	0.223607	0.288875	-0.115188	0.0731225	-0.108186	-0.207566	-0.479212	0.555092	0.206671	-0.045224	-0.122693	0.140948	0.238421	0.0501589	-0.0226169	-0.432729	0.0523447	-0.0559141	-0.0529779	-0.141344	-0.0373064	0.0371665	-0.31717	-0.0949719	-0.0249845	0.034092	-0.0330923	-0.597168	-0.145136	-0.386591	-0.114487	-0.371649	-0.088411	0.0177601	0.128918	-0.735893	-0.00860076	0.209894	-0.735806	-0.0512531	-0.72955	-0.0517498	0.558601	-0.0791703	-0.0286255	-0.423721	0.0481584	0.0110631
ISX	0.174065	-0.000316	-0.375752	0.130183	-0.237162	0.0245102	0.145256	0.0940073	-0.225128	-0.008548	-0.112142	-0.280784	-0.102551	-0.218716	0.0617	0.0708108	0.0851935	0.265124	-0.136866	0.0754485	0.215232	0.204304	-0.0784292	-0.22586	-0.0610041	-0.211798	-0.16018	-0.227512	0.0562813	-0.314607	-0.00892545	-0.116194	-0.247894	0.0108986	0.181365	-0.312176	-0.190744	0.124148	-0.2843	0.121839	-0.0900804	0.0740188	0.0101441	-0.103731	-0.0534301	-0.271074	0.548503	0.161317	0.156474
ITK	0.162049	0.344072	1.00836	-0.252179	0.618249	-1.32098	0.782765	1.40794	-0.000143	-1.16692	-0.0748016	1.09402	-0.542397	-1.40457	1.32836	0.350753	1.35632	0.284334	1.90181	0.427427	0.0552128	0.822687	1.0583	1.4397	1.21104	-0.314329	0.636989	1.85869	0.566575	-0.064111	-0.287488	-0.89494	1.30661	0.652591	0.0606157	0.569858	-0.601331	-0.0376506	0.978661	-0.193461	-0.813896	-1.36219	-1.64924	-2.04271	-0.116207	0.668655	-1.50581	-1.16464	-0.825318
IVD	0.0158476	-0.0969843	-0.00599596	0.133982	0.173641	-0.529653	0.0616194	0.0408033	0.239107	-0.401831	0.0720313	0.0645986	0.0355761	-0.363195	-0.0868222	0.0312628	-0.246841	0.405287	0.285313	0.280442	0.0166496	0.0514788	0.394021	-0.09307	0.199827	0.17479	0.182944	0.167169	-0.173834	0.283228	0.0431945	0.687843	-0.828399	-0.12818	0.37521	-0.00354641	-0.671978	0.0990331	0.0973103	0.0500074	0.138356	0.228272	0.197741	0.189966	-0.0216792	-0.0292642	-1.25926	0.164187	-0.525695
IVL	-0.856074	-0.576713	-0.683232	-0.505828	-0.869555	3.9409	-0.471402	0.354121	-0.558712	4.78438	-0.613478	-0.339059	-0.437761	-0.447312	-0.661794	-0.193684	-0.437104	-0.725783	-0.696673	-0.538738	-0.394735	-0.478442	-0.333075	-0.400529	-0.431068	-0.568571	0.499679	-0.70293	-0.376414	-0.761641	-0.435808	-0.491648	1.17715	-0.280091	-0.654241	-0.854678	-0.467958	-0.520186	-0.602656	0.129264	-0.276831	0.197182	-0.601284	3.05341	-0.437391	-0.638165	-0.0828136	-0.423494	2.96993
IYD	-0.0285209	0.149575	0.154524	0.126835	-0.064521	0.055686	-0.133496	-0.0502471	-0.00313709	-0.0479888	0.109849	-0.0787711	0.11156	-0.0761763	-0.0151466	-0.0667576	-0.0680833	-0.123947	0.0876644	0.140169	-0.0702889	0.117941	-0.0340394	-0.156464	0.0802527	-0.0367725	0.030691	-0.066575	-0.0830725	0.0714656	-0.308671	-0.0928462	-0.254829	-0.00168792	0.0237884	0.00767871	-0.0273259	-0.0483738	-0.00610864	-0.100997	0.241954	0.0591879	-0.00466965	-0.134789	0.0857409	-0.179005	-0.0248771	0.179907	0.0446057
Igk	-0.47837	-0.690477	-0.363625	-0.00977462	-0.107213	-0.362106	-0.223623	1.83558	-0.355108	0.684881	-0.424687	-0.339639	-0.493064	-0.0941483	-0.280332	-0.233571	-0.173285	-0.319648	-0.0461212	-0.296353	0.0933987	-0.353338	-0.0982237	0.186988	-0.635996	-0.540325	-0.310665	-0.710447	-0.105403	-0.129608	-0.274575	-0.529541	-0.14113	-0.200178	0.0604023	-0.601344	-0.186675	-0.251772	-0.652087	-0.166778	0.0289477	0.190181	-0.408754	0.255936	0.074976	-0.431368	-0.343977	-0.448908	0.144249
JMY	-0.22721	0.346823	-0.306598	-0.422286	0.57652	0.816582	-0.846868	-0.387283	0.16626	0.193629	-0.191596	-0.250643	-0.165226	1.19669	-0.148057	0.0241464	0.0325943	-0.256181	-0.159789	0.00560982	-0.0851282	-0.0511798	0.382812	0.402086	0.50354	-0.0133046	-0.180376	-0.114998	-0.124708	-0.379548	-0.433482	-0.137372	0.933485	-0.639954	-0.369914	-0.157864	-0.146718	-0.0808487	0.588817	-0.758999	-0.0114909	-0.245257	-0.0354045	1.22646	0.55059	-0.284059	-0.000442333	0.0128981	0.514539
BDKRB2	-0.556081	0.0759846	-0.946567	-0.370951	-0.0999062	0.741478	-1.09092	-0.83488	0.2652	0.833145	-0.492955	0.963167	-0.389679	-0.302328	1.49566	0.848289	1.33855	0.977651	-1.27822	0.222689	0.183733	-0.289605	-0.371098	-0.890304	0.26419	-1.18965	0.242983	-0.383309	-1.18337	-0.760688	0.150498	-0.529347	-0.0128914	-0.0293129	1.11713	1.07507	0.31308	-0.227153	0.440224	-0.872488	-0.281038	0.319365	-0.186589	-0.217471	-0.481066	0.401199	0.390012	-0.163319	0.189378
BDKRB1	-0.444424	-0.30882	-0.558642	-0.86974	-0.317697	0.390332	-0.394777	-0.368478	-0.69718	0.47301	-0.125517	2.39347	-0.789169	-0.346341	0.6811	0.0263506	1.71193	0.642243	-0.949861	-0.516201	-0.418478	-0.495099	-0.323332	-0.634999	-0.467779	-0.995389	-0.337642	-0.756801	-0.457603	1.77935	-0.349248	-0.701313	0.184772	-0.473066	0.693046	-0.0720483	0.644068	-0.102239	0.788442	-0.197974	-1.06806	0.921161	-0.409179	-0.335307	-0.371004	-0.144637	0.0652944	-0.705792	0.222408
JPX	0.0131695	0.50493	-0.0465578	-0.62605	0.101417	0.86014	-0.770288	-1.08753	0.187718	-0.433488	-0.498146	-0.329937	0.949951	0.503621	-0.139177	-0.721962	-0.182245	-0.0725493	0.386922	-0.347003	0.0494815	0.0858726	-0.212042	0.398345	0.0237887	-0.126606	0.451888	-0.140453	-1.03288	-0.794669	-0.479497	0.822577	-0.415525	-0.66142	-0.5445	-0.439302	-0.318463	0.455274	0.678926	-0.507045	-0.540656	1.09784	0.296585	1.63136	1.63094	0.001609	1.03714	0.229757	0.631198
JRK	0.0280094	-0.546269	0.0239915	0.0243306	-0.44479	0.281675	-0.0233208	0.0202526	-0.323832	0.131009	-0.438143	-0.41884	-0.212659	0.00564544	-0.0933461	-0.0935494	-0.152691	-0.22478	0.000863968	-0.064865	-0.186435	-0.386335	-0.140535	-0.0970164	-0.334572	0.0553894	0.000405485	-0.181804	-0.177133	0.0851275	-0.0304764	0.0672119	-0.347529	-0.105046	-0.202972	0.00472374	0.041372	-0.0571037	-0.128155	0.131131	0.01398	0.533364	-0.293794	-0.054294	0.148536	-0.0467745	-0.0663927	-0.118917	-0.0948779
ARID4B /// RBM34	-0.489283	-0.189186	-0.187639	-0.432697	0.00959171	0.449464	-0.12117	-0.520323	-0.322533	-0.0739945	-0.177262	-0.378476	-0.179379	1.03959	-0.230303	-0.275281	-0.17051	-0.215308	0.0545486	-0.434289	-0.500665	-0.269402	-0.111475	0.204215	-0.299797	-0.380414	-0.15702	-0.00819548	-1.1249	-0.57327	-0.483391	-0.419615	0.203507	-0.232571	-0.468418	-0.420574	1.2754	-0.44446	-0.125513	-0.96636	-0.604358	-0.149499	-0.352427	0.561445	0.600859	-0.34396	0.433963	-0.208852	0.135293
JTB	-0.103673	-0.356501	-0.226609	-0.19016	-0.602184	0.400345	-0.143325	0.305527	-0.392197	0.168835	-0.330098	-0.404207	-0.377377	-0.246237	-0.0534281	-0.101051	-0.0442972	-0.389526	-0.361746	-0.199668	-0.197825	-0.025807	-0.109788	-0.308113	-0.400896	-0.250942	-0.385779	-0.313378	-0.520761	-0.145493	-0.214858	-0.0813579	-0.0981567	-0.0971474	-0.375728	-0.190785	0.0499558	0.00912096	-0.61366	-0.111148	-0.274268	-0.101777	-0.553163	-0.27251	-0.0616756	-0.216952	0.312246	-0.254213	0.227454
CTD-3028N15.1	-0.726957	0.177473	-0.114245	0.0106489	-0.338684	-0.140947	0.347436	0.148766	-0.30096	0.0498304	0.217439	0.0670835	0.229023	0.308876	0.296371	-0.0711785	0.135923	0.704767	-0.245399	-0.0475009	-0.337353	-0.10972	-0.378935	0.413326	0.0799299	-0.68568	-0.29765	0.0583628	0.360178	-0.472582	-0.493583	-0.00152843	-0.12268	0.304309	-0.418924	0.443952	0.0045857	-0.221831	-0.184001	0.0309003	-0.469333	0.804757	0.129287	-0.0907682	0.20509	-0.557522	1.07407	-0.517832	0.291808
JUN	0.0999124	0.708209	0.185309	0.167396	0.67708	-0.380174	-0.234851	-0.319365	0.516512	0.575423	0.463635	0.411703	0.170455	-0.045592	0.972743	0.99366	-0.100775	0.834004	0.0794246	0.188832	1.346	1.0994	0.455269	-1.24321	1.27761	-0.186549	-0.39011	0.655798	2.00725	-0.448528	0.351021	0.886486	0.398421	0.296694	1.32018	0.701131	-0.883766	0.464509	-0.620583	-0.131894	0.500581	-1.68624	1.54251	-1.00547	-0.479822	0.765559	-0.942285	0.945665	-0.616672
JUP	-0.560097	-0.442173	-0.715094	-0.0928025	-0.700387	1.93248	-0.565277	-0.990714	-0.411975	1.66525	-0.0453754	-0.350561	-0.529104	1.2405	-1.04105	-0.622447	-0.447843	-0.540842	-1.14259	0.182298	-0.312199	-0.099523	-0.519051	1.64469	-0.44082	0.32828	-0.834815	-0.915617	-1.02891	-0.0135636	-0.37518	-0.0313891	1.54154	-0.459533	-0.298142	-0.471781	0.374645	-0.698018	-0.855315	0.171214	-0.430481	1.91788	-0.586449	2.05309	-0.440123	-0.448557	-0.32415	-0.71332	2.26684
KCP	0.00120775	-0.0968651	-0.276139	0.140149	-0.338822	0.193161	0.152099	0.287027	0.0381055	0.11717	0.0212304	-0.174455	-0.268371	-0.370915	-0.113209	-0.0157595	-0.16202	-0.0329536	-0.147231	-0.0826488	-0.133079	0.000726	-0.131946	0.182194	-0.19093	-0.178528	-0.444244	-0.116276	0.2	0.0683492	0.0968239	-0.164277	-0.00133329	-0.0769715	-0.299992	0.00447145	0.210632	-0.072184	-0.509239	0.301716	-0.0505934	0.454783	-0.0089233	-0.0629059	0.215343	-0.177314	0.557726	-0.0455618	0.544439
KDR	1.43097	1.43427	1.61647	1.29312	1.49614	-1.77081	0.721269	-0.742441	1.17398	-1.15906	1.33777	1.14982	1.43202	-1.06156	0.824863	1.27296	1.52907	1.16251	0.41683	1.50575	0.621997	0.389917	0.862344	-2.20627	0.960478	1.00532	1.07378	1.12167	2.09275	1.72622	0.790201	-0.0486189	-0.666466	1.66111	0.2011	0.923059	-1.31038	1.44822	1.09266	2.54241	1.06322	-2.12313	1.62597	-1.5464	-0.840938	1.05102	-2.57398	1.00782	-1.57291
KEL	0.135979	-0.305244	-0.478391	0.0121189	-0.122357	-0.267799	0.115968	0.464128	0.0972089	0.208517	-0.017745	-0.231378	-0.110829	-0.276472	-0.042962	0.215725	-0.390543	-0.149656	-0.371744	-0.175616	-0.510612	-0.0681696	-0.320334	0.535792	-0.0446218	-0.341139	-0.350844	-0.283469	0.140787	-0.308686	-0.166272	-0.177228	-0.0854014	-0.0483694	-0.263839	0.170187	0.556098	-0.0685204	-0.249567	0.397388	-0.388856	0.308753	-0.0201269	-0.0823701	-0.127891	-0.201221	0.0245266	-0.328882	0.182974
KHK	-0.367606	-0.195831	-0.354861	0.0601042	-0.0849269	0.255404	-0.212281	0.126445	-0.233548	-0.139692	-0.0285872	-0.309177	-0.134958	0.0144142	2.869e-05	-0.254818	-0.365827	-0.112534	-0.178126	0.0894379	-0.283342	-0.312669	-0.120672	-0.178821	0.165182	-0.245881	-0.0295613	-0.0401838	-0.00175809	-0.0403755	-0.00290365	-0.395636	-0.258011	-0.400183	-0.196882	-0.155536	-0.0570187	-0.139955	-0.133089	0.125993	-0.2794	0.161308	-0.317429	-0.275545	-0.158603	0.012025	0.722325	0.0112334	0.316034
KIN	0.177823	0.0145057	0.410206	-0.101853	0.716922	-0.00820338	0.0108406	-3.02e-05	0.142691	-0.388315	-0.0495172	0.085519	0.267686	-0.101897	0.0682182	0.0366044	0.0867234	0.0180223	0.126572	0.000311	-0.00903462	-0.032676	-0.108865	-0.0139533	-0.00230554	0.080558	0.403648	0.0899058	-0.198402	0.0405141	0.161292	-0.0626082	-0.0747302	-0.0244964	-0.0414041	-0.0645346	-0.520355	0.261424	0.794041	-0.171295	0.444696	-0.068794	0.498879	0.333095	-0.0644412	0.136304	-0.502587	0.290649	-0.599812
KIT	0.647943	0.760547	1.18728	0.538003	0.911279	-1.23359	1.43138	0.719672	0.677795	-1.24648	0.917956	-0.0154794	1.06912	-1.4923	0.483998	0.86225	1.37528	1.06114	1.43626	0.379093	0.0759844	-0.0643332	0.711009	-1.39806	1.03481	1.11488	1.54523	1.81601	-0.228418	0.512501	-0.138399	-0.214753	-0.420594	1.33754	0.260478	0.561216	-1.76053	0.528297	0.966856	0.184055	0.942115	-3.18119	-0.798886	-0.881579	-1.8703	1.40728	-2.87506	0.404175	-1.8781
KIZ	0.186419	0.363012	0.354335	-0.0539886	0.40995	0.0600771	-0.499621	-0.182719	0.274656	-0.252913	-0.152743	-0.246936	-0.128408	0.136252	-0.165269	0.303478	-0.2822	-0.303819	-0.0366277	0.0675763	-0.0310224	-0.17827	0.15167	-0.253865	0.0193326	-0.316267	0.28334	0.0933547	-0.423862	-0.275182	-0.342803	-0.432198	-0.320307	-0.306053	-0.0598821	0.376183	0.0020228	0.43476	0.290541	-0.577071	0.0374958	-2.00157	-0.112107	0.387878	0.147954	-0.106166	-0.81436	0.0736159	-0.834382
KLB	2.93031	1.62194	3.85893	-0.199347	0.611259	-1.40029	0.820581	-0.854477	2.68218	-1.00867	1.71033	1.08685	0.346911	-1.34074	2.61315	1.90403	-0.0138029	2.05776	0.618936	1.96055	0.555177	0.759291	0.716546	-1.40975	0.170945	-0.188186	1.5283	3.30584	0.126579	1.32355	1.2194	2.5143	-1.29375	2.64806	-0.369052	0.889695	-1.31931	1.35667	1.34176	-0.0572268	1.53503	-0.686342	2.22478	-1.15369	-1.0197	1.47682	-1.33651	0.822689	-1.53277
KMO	0.828293	0.918645	1.61155	0.863676	1.25833	-0.630128	1.08227	0.624847	0.146378	-2.25861	1.12059	2.32395	-0.355146	-2.00399	0.275734	0.867916	0.995829	0.866001	1.44882	0.20772	-0.472195	1.9186	1.63327	1.94754	1.12847	-0.159828	0.209071	0.744689	-0.0981685	-0.677865	1.45169	1.47047	0.530792	0.92912	2.3048	0.786696	-1.22594	-0.224345	0.0897148	-1.42157	0.678482	-1.6912	0.748461	-2.44166	0.0513774	1.11414	-1.56157	0.0770363	-0.0125368
LAT	-0.000316432	0.197036	0.712315	0.0715976	0.0840439	-0.0419632	-0.143002	0.76196	-0.132065	-0.694863	-0.560437	-0.229908	0.0526176	-0.680054	1.03964	0.300813	0.159429	0.053066	0.809775	0.793625	-0.178557	-0.707226	-0.373753	0.561969	0.455413	-0.333156	0.457542	-0.0877106	-0.0352307	0.302593	-0.0564878	-0.396622	0.433185	0.438547	-0.365274	0.503212	-0.221595	0.244737	-0.0764581	0.350512	0.142194	0.371683	-0.557067	-0.716318	0.250506	0.432445	-0.640999	-0.139942	-0.00892828
LBH	0.703733	1.39927	0.575092	1.81804	0.964141	-0.662868	1.14098	0.785641	0.976211	0.140541	1.48072	0.36788	1.08823	0.591785	-0.300752	1.18507	-0.0607372	0.870891	1.29717	1.50679	0.404635	0.100701	0.914026	-0.0441819	1.34342	0.845927	1.67298	1.15944	-0.0602388	1.48428	-0.0407897	0.134254	-0.212017	1.049	0.258444	0.659132	-0.19435	0.336802	1.00023	0.806623	0.515845	-0.626023	-0.185044	-1.01178	0.246365	0.403349	0.46823	-0.0412185	0.0213808
LBP	-0.372198	0.0198988	-0.322231	-0.0911599	-0.133978	-0.254459	-0.134005	0.0831223	-0.0951478	-0.144302	0.0359482	-0.117434	0.265954	-0.110631	0.0754027	-0.062305	-0.0567038	-0.172435	-0.355144	0.136722	-0.0260758	-0.18003	-0.60296	-0.207245	-0.276934	-0.382113	-0.288574	-0.23611	0.147427	0.0442352	-0.0702572	0.0215845	-0.238136	-0.0723408	-0.0479158	-0.147437	0.423115	0.0350726	-0.306276	0.235439	0.0332332	0.306665	-0.11477	-0.0810774	0.146782	-0.440272	-0.067643	0.161115	0.538984
LBR	0.067961	-0.212678	-0.0942061	-0.29467	0.0224215	0.337601	-0.336691	-0.0421767	-0.290531	-0.479828	-0.174592	-0.223679	-0.295313	0.595647	0.0856376	-0.112554	-0.0754505	-0.128445	-0.0512015	0.0783167	0.0434767	-0.103481	-0.163619	0.376686	-0.064149	-0.294301	-0.0332082	-0.466807	0.00210323	-0.187747	-0.265378	-0.56726	-0.318733	-0.257852	0.0904864	-0.365942	-0.101073	0.0318005	-0.00385714	-0.618787	0.0902605	-0.430048	-0.498277	0.162672	-0.143449	-0.297402	0.820918	-0.388355	-0.643749
LCK	0.340544	0.109574	0.581565	-0.476598	-0.0699387	-0.600186	-0.080242	1.80879	-0.132837	-0.608361	-0.0840839	0.0376367	-0.223304	-1.00388	0.48062	-0.0797398	-0.18945	-0.641869	1.50549	0.531143	-0.01264	-0.765487	-0.589043	1.31127	0.572987	-0.59057	-0.208317	0.178146	0.0422646	0.156302	-0.665759	-1.06907	1.13642	0.571032	-0.727824	0.571689	-0.582085	-0.0821197	-0.168088	-0.0425572	-0.681615	-0.343296	-1.38694	-1.78019	-0.30505	0.425316	-1.3899	-0.766382	0.288608
LCT	0.0700356	-0.192437	0.0739896	0.182038	-0.478279	-0.00691262	0.00596943	0.410281	-0.251842	0.0964681	-0.0965592	-0.0908255	-0.181886	-0.0381557	0.024315	-0.0686958	-0.383253	-0.144308	-0.0809126	0.0209255	0.0289011	-0.12926	-0.216635	-0.357477	-0.412641	-0.320464	-0.366126	-0.0386392	0.173453	-0.193069	-0.0478	-0.129815	-0.187131	-0.205761	0.0104391	-0.193691	-0.273195	0.0435738	-0.21184	0.101184	-0.0294519	-0.0341509	0.0705888	-0.109325	-0.387443	-0.115914	-0.0136783	0.205524	-0.0690281
LOC286149 /// MIR3150A /// MIR3150B	-0.290566	-0.151965	-0.35921	0.11171	-0.362157	-0.519516	0.30002	0.316503	0.190141	0.206531	0.0256778	-0.565461	-0.534951	-0.0549389	-0.0929048	0.37998	-0.236999	-0.0837881	-0.450353	-0.102246	0.165387	-0.0840633	-0.322359	-0.27266	0.0898	-0.647925	-0.234762	-0.408068	0.374839	-0.714307	-0.15128	-0.284183	-0.49284	0.0437967	-0.123068	-0.189825	0.352674	-0.1648	-0.194542	0.878729	0.0645319	0.599007	0.0778348	-0.19155	0.24819	-0.61255	0.16663	-0.106457	0.021927
LEP	-0.30893	-0.43149	-0.447183	-0.183843	-0.395261	0.454876	-0.0620773	0.0779252	-0.326454	0.391466	-0.0847781	-0.333866	-0.142701	-0.255436	1.59395	0.105282	-0.353768	-0.0685829	-0.321998	-0.15366	-0.298348	-0.113319	-0.499496	0.223947	-0.162006	-0.273745	-0.413137	-0.35144	0.129639	-0.306052	-0.319842	-0.151102	0.168242	-0.184843	-0.334683	-0.0431892	0.396918	-0.0321619	0.502776	-0.0485619	-0.320441	-0.076595	-0.0620613	-0.0970905	0.232251	-0.470679	0.350997	-0.238816	-0.155674
LIF	-0.646667	0.87739	-0.676983	0.324181	-0.00841693	-0.509787	0.0460922	-0.663022	-1.31659	0.968846	1.57571	4.05603	-0.212339	-0.613281	0.657357	2.65774	2.53154	2.05323	-0.69062	-0.927155	0.370581	2.01008	1.20038	-1.01234	0.109321	-0.476774	-0.167345	-0.295282	2.31211	-0.393802	1.71534	-0.260407	1.10955	-0.00890206	3.27648	2.07949	0.335264	-1.32931	-0.411529	-0.642887	-1.99741	-1.23689	0.976803	-1.74248	-1.39088	1.03251	0.0267138	-0.899838	-1.52552
AHCTF1	-0.0860847	0.243774	0.138592	-0.427966	0.0312467	0.233806	-0.355711	-1.05625	-0.137911	-0.172787	-0.546512	0.0266418	-0.202011	0.369093	0.0485041	0.32233	0.218494	-0.0318833	-0.135786	-0.176564	-0.24838	-0.0451701	-0.0560768	0.112129	-0.130848	-0.14875	-0.00391288	0.196283	-0.0837115	-0.645453	-0.248162	-0.170086	-0.512076	-0.0836797	0.13941	-0.174107	0.605076	0.0961685	0.0849268	-0.2353	0.132633	-0.0548089	0.212386	1.14661	0.768933	-0.0695746	1.56676	0.0995747	-0.524601
LOR	-0.218708	-0.27947	-0.165397	0.0156517	-0.336855	0.297347	0.040291	0.11764	-0.318984	0.37319	-0.0781832	-0.223921	-0.386863	0.0617578	-0.0141859	-0.371158	-0.179397	-0.222424	0.0772237	-0.0156222	0.024033	-0.241348	-0.0353991	-0.0505231	0.0564378	-0.194288	-0.294182	-0.134656	0.00882998	-0.0963223	-0.0599937	-0.0525149	-0.226043	-0.0976072	0.234923	-0.139397	-0.053095	-0.14414	-0.0850753	0.168893	0.114011	0.13049	-0.248615	-0.149084	-0.0288796	-0.0639742	0.0530639	-0.366466	0.529893
LOX	-0.720071	-0.334239	-0.356828	-1.3246	-0.477512	1.27731	-0.0453798	-0.452758	-0.881365	2.39636	1.30278	-0.366417	-1.03793	0.467216	-0.84362	0.119196	0.117299	-0.468672	-0.693657	-0.538916	-0.462183	-0.732614	-0.490226	-1.62393	-0.439555	1.60918	-0.508335	-0.541201	-0.785679	-1.40832	-0.938628	-1.65207	2.81709	-0.423709	-0.959148	-0.799708	1.71711	-0.600391	-0.60873	-0.857871	-1.43372	-1.74802	-1.67055	0.668622	-0.0572134	-0.382392	0.266765	-1.6791	-0.32288
LPA	0.179016	0.134702	-0.202258	0.304187	-0.249082	0.3916	0.112508	-0.15757	0.0301946	-0.0367962	-0.0414057	-0.0488474	0.0393567	0.0427042	-0.270975	-0.133701	-0.0666256	0.151695	0.0763706	-0.0687834	0.0610777	-0.154148	0.0936314	-0.0649084	0.162502	-0.003487	-0.0640032	0.122359	0.0205949	0.0462247	0.356453	-0.104176	-0.137883	-0.000873	0.00851302	0.0666236	0.385353	-0.105346	-0.259796	0.0710821	0.04879	-0.0673318	-0.191971	0.136856	-0.122083	0.136676	0.146385	-0.0967532	-0.0546455
LPL	1.79201	2.11094	1.81993	1.54722	1.69888	-2.24834	2.31947	0.348647	0.842258	-2.42898	2.36022	2.32234	1.3227	-3.31689	1.4842	1.35454	0.824493	1.83391	0.863512	1.28074	1.62616	2.44776	2.20607	0.259424	1.56606	2.04318	1.40639	1.72548	1.94247	1.05983	2.29154	3.00374	-2.28434	1.62813	2.12028	1.23918	-4.15401	1.60709	1.425	1.60828	0.993954	-3.83511	2.08921	-2.99927	-0.392047	1.89321	-3.67684	1.99976	-1.39697
LPO	-0.285235	-0.15524	-0.0390085	-0.0693291	-0.400503	0.00317748	-0.0747731	0.310469	-0.373633	0.0430731	-0.23899	-0.288403	-0.15634	-0.124685	-0.272572	-0.454357	-0.0670398	-0.288517	-0.242897	-0.00446096	-0.168073	-0.188547	-0.0516547	0.348829	-0.31008	-0.589765	-0.345931	-0.264458	0.225178	-0.335568	-0.262909	-0.0660799	-0.302673	-0.0826918	-0.204803	0.0882184	-0.098927	2.75253	-0.521776	0.403349	-0.115685	0.440487	-0.122244	-0.183928	0.377234	-0.246095	-0.113593	-0.158575	-0.099826
LPP	0.11313	-0.0319912	-0.396421	-0.0217433	-0.0195798	0.546807	-0.0775942	-0.261698	0.179577	0.210591	0.247745	-0.0567004	0.352146	-0.0142829	-0.0446762	-0.0387906	-0.169238	0.0572773	0.0892193	-0.188404	0.517697	0.190343	0.00788536	-0.123681	0.237892	0.355925	-0.116722	-0.0619256	0.122268	0.0861105	0.059706	0.315898	0.230913	-0.0284967	0.161386	0.144875	0.24887	0.134319	0.123948	0.3487	0.0274839	0.113106	0.131052	0.451767	0.217802	-0.149405	-0.193663	-0.147286	0.121737
LSR	-0.609545	-0.712701	-1.14847	0.0383743	-0.858561	0.748685	-0.738729	-0.295839	-0.763817	0.911758	-0.420567	-0.0151508	-1.06354	0.222124	-0.726431	-0.734288	-0.0714946	-0.697008	-0.62118	0.259728	-0.588433	-0.343576	-0.0877982	0.635078	-0.644218	-0.311302	-0.606169	-0.546712	-1.44124	0.515939	0.0592755	0.433679	1.74777	-0.0864657	-0.660876	-0.817859	-0.650224	-0.769009	-0.83428	-0.0267529	-0.122193	2.3661	-1.73545	0.156125	-1.47	-0.431803	-0.336248	-1.25811	0.409451
LSS	0.101724	0.672334	0.321234	0.136582	0.37948	0.0626216	-0.119302	-0.315126	0.238698	-0.282359	0.190068	0.819351	0.00938758	-0.619372	0.404638	0.10341	0.182845	0.294664	0.323678	0.860047	0.184663	0.688207	0.393554	0.436388	0.252998	0.0707339	0.46585	0.220089	-0.2353	0.510841	0.608039	1.18966	-0.018005	0.0960589	0.399328	-0.323912	-0.234597	0.369423	0.270961	-0.00248056	0.329763	-0.363018	-0.0578979	-0.291516	-0.409444	-0.135866	-0.197798	0.289587	-0.0566368
LTA	-0.479628	-0.228642	-0.158253	0.0932398	-0.260903	0.201804	0.219183	1.25447	-0.139357	0.0295807	-0.426508	-0.421893	-0.291115	-0.36473	0.143291	0.010141	-0.0954709	0.023935	0.0964038	-0.133453	-0.469925	-0.230587	-0.516152	0.612198	0.117414	-0.41031	-0.0810689	-0.0771786	0.00961613	-0.357409	-0.429624	-0.148114	0.115627	0.158842	-0.606414	-0.00535771	0.118938	-0.138409	-0.378559	0.102256	-0.447741	0.352881	-0.151847	-0.161041	-0.00535771	-0.0359305	0.41213	-0.480271	0.773556
LTB	-0.0699468	-0.367138	-0.340859	-0.377455	-0.237373	0.283369	0.00971053	1.21426	-0.637148	-0.0596439	-0.562728	-0.227488	-0.304952	-0.531278	0.106278	0.315683	-0.0351078	-0.117665	0.719563	-0.236555	-0.229254	-0.498709	-0.289604	0.72854	0.0302969	-0.396188	-0.144898	-0.594625	0.483989	-0.0406404	-0.206219	-0.640446	0.261048	-0.0139797	-0.382656	0.273546	0.23749	-0.358285	-0.369243	0.262267	-0.477037	0.641126	-0.649567	-0.889861	0.11309	-0.0651961	-0.00176306	-0.702111	0.325605
LTF	1.27364	-1.28119	-0.894018	-1.75334	-1.81343	0.572326	-0.211502	4.89967	1.70458	2.27801	-0.0621165	0.732571	-1.48851	-3.29362	0.100089	1.75933	-1.0569	-2.09149	-2.18345	-0.410115	-0.260086	-2.47786	-2.04279	-2.79361	-0.537133	-2.50209	-2.2228	-1.54256	-1.89651	-1.27755	-1.06419	0.0405471	3.98258	-0.91426	0.823585	1.18683	-3.69203	4.77123	-0.61158	-1.14702	-1.54326	-2.76281	-1.50159	1.64263	2.23249	-1.51167	1.56818	-1.65919	2.13172
LTK	0.637801	0.204756	0.0961085	-0.0437124	-0.0550271	-0.61074	0.187032	0.389848	-0.137419	-0.00795936	0.128804	-0.27806	0.0691784	-0.396571	0.118672	-0.0721167	-0.193999	0.564949	-0.253204	0.686235	-0.515254	0.0404863	0.255881	-0.132256	-0.490593	-0.0227528	-0.418881	0.387238	1.58067	-0.546375	0.808022	0.840964	-0.164764	0.471518	-0.19376	0.070666	-0.267173	0.366081	-0.395494	0.488025	0.470185	0.169243	0.0223041	-0.512374	-0.0252391	0.367897	0.213856	0.031015	0.234314
LUM	0.26598	-0.112794	0.565324	-0.0256428	0.19954	-0.599092	0.532669	0.92838	-0.239654	1.34649	0.559231	0.498946	-0.150997	0.181631	0.382958	0.940282	0.44253	0.0384217	0.111628	0.678854	0.557249	0.238935	0.350064	-0.734599	-0.310368	0.710469	0.987034	0.0972746	0.0391041	-0.193489	-0.0204851	-1.06672	0.335939	0.266505	-0.217088	-0.566646	0.449826	0.643112	0.356943	-0.467772	0.199517	-1.65534	-0.876862	-1.34793	0.0371038	0.18329	-1.39471	0.130606	-0.810409
LXN	-0.162348	0.0940977	-0.150893	-0.273969	0.128551	0.000423	0.959601	1.24978	1.27027	0.284068	1.81223	-0.0489534	-0.0745122	-0.195439	0.0218708	0.539536	1.32905	0.221842	-0.153879	-0.441788	0.669308	-0.717942	-0.281831	0.621684	-0.252911	1.09411	0.870287	0.184837	-0.390473	-0.0111235	-0.749724	-1.0853	1.11866	0.667877	-0.441514	0.719079	0.871289	0.09468	0.188054	0.404498	-0.191381	-1.85959	-0.559965	-0.362065	0.255694	-0.122272	-1.01132	-0.311917	-0.775953
LY9	-0.0496377	-0.382343	0.354357	-0.61111	-0.0776091	-0.291532	-0.0661511	1.46561	-0.121341	-0.178258	-0.282196	-0.44195	-0.197561	-0.338999	0.464226	0.268569	0.851794	-0.509984	0.483606	-0.14522	0.0118286	-0.414614	-0.796999	1.26455	-0.0651006	-0.84844	-0.424792	-0.348308	-0.0214966	-0.184059	-0.399514	-0.475246	0.538127	-0.250422	-0.208179	-0.0639601	0.253049	-0.248043	-0.17496	-0.145068	-0.898237	0.148726	-0.353323	-0.560877	1.15003	-0.100874	-0.423034	-0.558052	0.769847
LYN	0.27801	0.565718	0.224397	0.115051	0.172295	-0.396771	0.625363	0.575286	0.136937	-0.792737	0.260477	0.898646	0.200425	-0.491095	0.867334	-0.25746	0.544096	0.866801	0.619515	0.0868859	0.999989	0.263171	0.385113	0.195127	0.770693	0.274218	-0.281422	-0.0388603	0.388241	-0.0717803	1.09473	0.0528212	0.641648	0.414	0.849785	0.827456	-0.154432	-0.343382	0.0152705	0.125656	0.151999	-1.49408	0.72646	-0.123127	-0.321461	0.543204	-1.52126	0.222032	-0.142103
LYZ	1.62072	-1.91369	1.40282	-1.17312	0.90104	-1.0386	1.61387	0.873103	1.64706	-0.367827	1.26723	1.3615	-0.445406	-1.24097	1.51396	0.424869	1.47524	0.610915	1.74256	-1.54659	-1.83844	1.57606	-0.747349	-1.01743	-1.88328	0.809107	-1.68603	1.31066	0.950773	-1.96712	1.46324	0.812507	2.0718	1.27876	0.348715	0.666732	0.871397	1.13541	0.726888	1.05218	0.533659	-2.14561	-1.82181	-2.71244	-0.243891	0.454603	-2.52242	0.943776	0.369911
SH3RF3-AS1	0.242693	0.0233778	0.075196	-0.0502414	-0.180245	0.0710656	0.0494139	0.0608391	-0.217127	-0.0668549	0.155126	0.128967	0.115994	-0.0188441	-0.0679705	-0.0348115	0.170819	0.0286949	-0.112343	0.126277	0.90628	-0.0288941	0.152163	0.120826	0.0823772	0.0983642	-0.0579772	0.0142847	0.403043	-0.0935908	-0.0154599	0.0859999	-0.0270265	0.0734251	0.0906273	-0.116116	0.0670972	-0.094709	-0.0253493	-0.249299	0.352761	-0.189658	-0.00472265	-0.288657	-0.191078	0.294031	0.257124	-0.0499168	-0.164677
MAG	-0.310829	0.0201937	-0.278401	-0.260247	-0.382087	-0.213165	0.103936	0.281563	-0.22931	-0.00906448	-0.224433	-0.0772735	-0.0540667	-0.120841	0.14398	0.225628	0.125844	0.32349	-0.294848	-0.1497	-0.30691	0.00629424	-0.179927	-0.0325524	0.250695	-0.0551718	-0.311179	0.00556663	0.190717	-0.378917	-0.083413	0.0741858	-0.0947835	0.25815	-0.290465	-0.160232	0.353484	-0.160403	-0.306116	0.530397	-0.0877161	0.403957	-0.243203	0.00569267	0.125981	-0.0753516	0.687484	-0.14116	0.43736
MAF	-0.0433985	0.141708	0.107385	-0.0682697	0.115953	0.0546056	0.0575464	0.0700856	-0.0633636	0.43466	0.0615141	0.101605	-0.0630089	0.125414	0.0673143	-0.136408	-0.0644428	0.0166087	0.351901	0.267525	-0.0434044	0.0404579	0.17896	0.101526	0.206084	0.157357	0.568849	0.411716	-0.192653	-0.0128185	-0.0640471	-0.0957523	0.146195	-0.142101	-0.087218	-0.0645297	0.43301	0.0159298	1.02581	-0.125037	-0.0086574	-0.227625	-0.426896	0.50616	0.221735	0.165223	-0.444868	0.0370182	0.348019
MAK	0.921438	0.356629	0.594849	0.0734767	0.275528	-0.183652	0.164231	-0.263998	1.21732	-0.667323	0.0377342	0.774273	0.205036	-0.394594	0.329438	0.815813	0.705658	0.248658	-0.434335	-0.124188	0.624325	0.396885	0.337732	-0.635128	0.286158	0.46655	-0.37106	0.199958	0.0162394	-0.11615	0.324615	-0.198849	-0.244785	0.0433819	0.919701	0.694607	-0.163274	0.232135	0.0198081	0.378739	0.594439	-0.451874	0.147606	-0.292082	-0.393096	0.334296	0.149325	-0.185483	-0.21679
FSCN1	-0.590149	-0.838323	-0.822061	-1.03246	-0.909165	1.11467	-0.12516	0.165462	-1.26704	1.72592	0.394131	-0.461822	-0.867838	0.838826	-0.808058	-0.414602	-0.632076	-0.553359	-0.766232	0.128049	-0.72446	-0.881965	-0.828862	1.28373	-0.6704	0.501415	-0.430477	-1.09653	0.232685	-0.64004	-0.810303	-1.10057	0.797244	-0.130625	-1.24061	-0.669589	1.1965	-0.84694	-0.908971	-0.115504	-0.827554	1.08923	-0.942693	0.967592	0.25786	-0.516986	0.996756	-1.21839	0.790969
MAL	0.61499	2.06406	1.54476	1.14181	1.17794	-0.35397	0.755204	0.409209	0.680777	0.98357	-0.473881	1.2003	0.920309	-1.89555	0.605995	1.84301	1.77308	1.39488	1.01417	2.02207	1.56726	1.54071	1.28138	-0.219972	1.71481	0.4876	1.12039	0.798588	0.638565	1.13577	1.04024	0.21459	-0.69332	1.13274	1.45106	0.718246	-1.19631	1.93517	1.26324	0.464997	1.12211	-1.87451	-0.489359	-0.598874	-0.953032	1.46933	-2.16537	0.545453	-0.63451
FSCN3	-0.208574	-0.0943501	0.00164349	0.211641	0.0445437	0.0544962	0.154421	0.462728	-0.0806854	0.24276	0.00222301	0.0181307	-0.0112809	-0.0998116	0.0416514	0.214633	0.239261	-0.0370224	-0.590602	-0.0953855	-0.338266	0.046393	-0.358935	-0.319539	-0.121097	-0.364153	-0.355908	-0.261975	0.260885	-0.256477	-0.129716	-0.0742755	-0.253403	-0.0823727	-0.27926	-0.562656	-0.0954993	0.227258	-0.17574	0.532683	-0.0575744	0.266986	0.16148	-0.0855035	0.446782	-0.282404	-0.313066	0.501698	0.00164349
FSCN2	-0.109217	0.258291	-0.190697	0.0473276	-0.0890852	0.355413	0.205286	-0.334618	0.0204557	-0.400114	-0.301673	-0.0264741	-0.146176	-0.355872	-0.15834	-0.181524	-0.0792566	0.0856548	0.160584	-0.0639679	-0.195432	-0.216909	-0.074307	0.19538	-0.207589	0.162425	-0.123331	-0.15235	0.11721	-0.203499	-0.159212	0.0102936	-0.0385855	0.0898818	0.0921747	0.053507	0.434967	-0.00534773	0.0847865	0.126542	0.123367	-0.156367	-0.4503	-0.00779972	-0.297517	0.213421	0.243519	-0.15235	0.0498708
MAX	0.1687	0.0324044	-0.411518	-0.101277	-0.558551	0.0235545	0.295364	0.203418	-0.0453795	-0.0647779	-0.021688	-0.0599945	-0.239686	-0.40602	-0.0374981	-0.108599	0.168325	-0.0866245	0.363616	-0.509886	-0.0470302	-0.252644	0.0127294	-0.174996	0.126858	0.111815	-0.312719	-0.0287792	0.457624	-0.0751316	-0.22358	-0.224291	0.384652	0.180792	-0.010042	-0.152704	0.0477984	-0.484679	-0.542789	-0.220451	-0.171612	-0.37905	-0.430817	0.0669914	-0.260241	-0.191861	-0.00441421	-0.243521	-0.0606178
MAZ	-0.436362	-0.852563	-0.703517	-0.0674988	-0.992109	0.148275	-0.364783	-0.00585693	-0.381121	0.434308	-0.265355	-0.444886	-0.598389	0.0889022	-0.455648	-0.555433	-0.0268746	-0.357801	-0.295432	0.0153736	-0.226064	-0.133243	-0.181982	-0.303231	-0.727347	-0.0221192	-0.754589	-0.658623	-0.503646	0.651532	-0.158982	0.254225	0.274594	-0.292257	-0.476255	-0.576837	-0.140044	-0.584611	-0.780242	0.168166	-0.449592	0.0360547	-1.02157	-0.916441	-0.498948	-0.555458	0.770095	-0.877508	1.22228
MBP	0.170862	0.239077	-0.0723221	0.064963	-0.280047	0.0386425	0.258193	0.179777	0.295617	-0.349131	0.182411	0.0374308	0.131496	-0.629604	0.20629	-0.204749	-0.0205874	0.0978033	0.0544778	0.0387916	0.0562823	0.0470846	0.12993	-0.031875	-0.0904084	0.325976	-0.123702	0.0453161	0.110818	0.13776	0.07597	0.0495848	-0.0978522	0.0378772	0.234396	0.11336	-0.482176	0.33992	0.23907	0.480824	0.166398	-0.102792	-0.189892	-0.562128	-0.369688	0.204622	-0.133924	-0.0308202	-0.231346
MCC	0.64031	1.12872	0.436795	0.416785	0.485481	-0.579524	-0.000166665	-0.729241	0.655428	1.10047	0.588518	0.38566	0.422321	0.459979	0.119642	0.25112	0.267058	0.423837	0.12514	0.403815	0.35932	0.471819	0.747682	-0.683098	0.286316	0.517556	0.391731	0.868303	1.09366	0.558245	0.116235	0.24654	1.53861	0.450623	-0.0241851	0.347282	0.439045	0.586695	0.560446	0.781398	0.501149	-1.07994	0.656212	1.36875	0.181105	0.376961	-1.70694	0.444685	0.0839552
MCU	0.222136	-0.109763	0.156796	-0.0239432	0.017094	-0.394095	0.479473	-0.507563	0.327433	0.353655	0.193835	0.227754	0.0955457	0.238513	0.0492037	-0.217175	0.311285	-0.00238126	-0.248634	-0.211921	-0.288613	-0.0299639	-0.0396701	-0.208298	-0.0582639	0.308164	0.451146	0.269088	-0.384567	0.299391	0.166985	-0.0909094	-0.0524156	0.118625	0.182932	-0.315634	-0.483837	-0.336816	0.0647739	0.293566	0.0979184	-0.309356	0.208846	-0.202783	-0.506569	0.124892	-0.0333424	0.146205	0.381946
FSD1L	0.899336	-0.329475	0.4396	-0.122108	0.589148	-0.390308	-0.240118	-0.327316	1.42523	-0.29521	-0.210541	0.118166	0.0654219	-0.391065	0.0379734	0.104451	0.173929	-0.334087	-0.131563	-0.289189	0.0422352	-0.271538	-0.15809	-0.601546	0.213717	-0.291695	0.0127173	0.487473	-0.351533	-0.0296643	-0.0213731	-0.197131	0.739416	-0.0935281	0.133856	0.426644	-0.517394	-0.0602238	-0.00898509	-0.27369	0.232734	-0.717584	0.770034	-0.260463	-0.268213	-0.0692516	-0.435082	-0.0536737	-0.449325
MDK	-0.945464	-1.1198	-1.63991	-0.877399	-1.89585	0.306272	-0.374925	0.0536063	-0.674265	-0.134587	-0.696617	-1.50268	-1.54256	1.33625	-1.76444	-1.09368	-0.730018	-1.35695	-0.56417	-0.742749	-1.24687	-1.45856	-0.514135	0.919244	-0.599028	-0.539919	-0.89783	-1.42249	-1.47409	-0.760879	-0.968818	-1.3833	0.827242	-0.252274	-1.45469	-0.794705	0.49323	-1.29507	-2.21576	-1.42112	-1.56097	-0.896225	-2.50905	-0.815422	-0.839605	-0.836414	1.09379	-2.0259	1.44538
ME1	-0.033623	-0.472759	0.0941014	-0.223521	-0.0954006	1.8463	-0.0606644	-0.409053	-0.52634	-0.835975	-0.159862	0.175293	-0.337756	2.12243	0.0442949	-0.0768344	-0.982763	-0.164014	0.0731484	0.0199071	-0.0812208	-0.162702	-0.0288549	0.156204	-0.22839	-0.265024	0.0139486	-0.472966	-0.547645	-0.0950133	-0.170827	0.471659	-0.393923	-0.114647	-0.0841534	-0.172211	1.80177	0.0202076	0.172992	-0.412331	-0.135407	-0.427747	0.52367	2.29838	1.63191	-0.165033	-0.0160196	0.0777688	0.123608
ME3	-0.00330615	0.19021	0.019052	0.218565	0.0140148	-0.44253	0.283349	0.0657351	0.256009	-0.385173	0.126804	0.165835	-0.0518943	-0.814574	0.140751	0.281552	0.317095	0.00831238	-0.0349094	0.301176	-0.112436	-0.0285987	0.0132294	-0.249217	0.126752	0.391973	0.234129	0.172376	-0.0948477	0.341123	0.0100351	0.0221203	-0.507526	0.140562	-0.181347	0.374809	-0.49284	0.133806	0.00378597	0.185741	0.157305	-0.258926	-0.105287	-0.624786	-0.568392	0.127559	-0.387907	-0.00841466	0.18905
ME2	-0.454462	-0.214776	0.25298	-0.466147	0.121997	-0.887349	0.515234	0.41348	0.0688416	-0.183031	0.257691	0.260677	-0.134372	0.514426	0.157679	-0.305582	0.054826	-0.0698955	0.415571	-0.948445	-0.796951	0.191886	-0.521039	0.125832	-0.145993	-0.462549	0.129901	0.171192	-0.676804	-0.379729	-0.416047	-0.0863086	0.472092	0.0532843	-0.78195	-0.42444	0.38825	-0.434773	-0.169825	-0.960186	-1.08684	-0.862743	0.041098	-0.605727	-0.019725	-0.214966	-0.97975	-0.106966	-0.607422
MET	0.287587	-0.145985	-0.554129	-0.120941	-0.0785499	-0.953364	0.526591	-0.269867	0.466247	-0.183516	-0.0834218	0.425779	-0.0403377	0.279748	-0.551637	-0.464153	-0.0377732	-0.256735	0.502862	-0.479001	-0.18294	0.623718	-0.677323	-0.538406	-0.67172	-0.107909	-0.384426	0.400021	-0.283827	0.203625	0.165941	0.619065	0.60874	0.161157	0.0689841	-0.403477	-0.57483	-0.598343	-0.804023	-0.321062	-0.359827	-0.320983	-0.121037	0.213746	-0.119157	-0.200421	-0.481358	0.0812454	-0.400887
MFF	-0.20713	-0.353452	0.116566	-0.49898	-0.294822	-0.200873	-0.262318	-0.536314	-0.254897	-0.0701972	-0.33473	-0.561733	-0.493999	0.119462	-0.194921	-0.0292022	-0.0968702	-0.230799	-0.243833	-0.377874	-0.500459	-0.301183	-0.277148	-0.0274468	-0.289381	-0.11199	0.0637315	-0.320209	-1.04027	-0.231284	-0.431187	-0.375381	-0.12894	-0.0718756	-0.30428	-0.53414	0.259379	-0.119868	-0.332865	-0.378544	-0.275236	-1.08621	-0.313893	-0.06314	-0.31764	-0.379977	-0.22429	-0.314606	-0.396036
MGA	-0.0121307	0.11821	-0.143914	0.132973	-0.0266888	0.519918	-0.346051	-0.145243	-0.0266888	0.0625962	0.0901538	-0.193666	0.0582854	0.856874	0.0158105	-0.00370165	-0.106802	0.00564816	-0.0276064	-0.0612511	0.0971776	-0.126791	0.00400156	0.0626056	0.136068	-0.11477	0.111657	0.0470798	-0.46345	-0.0967167	-0.0386633	-0.0271309	-0.0242463	-0.387601	0.167208	-0.156514	-0.247823	-0.113813	0.0674604	-0.7063	-0.299879	0.388893	0.108601	0.0971747	0.0475338	0.0773364	-0.0953924	-0.111817	-0.0473043
MGP	0.465043	-0.103569	1.51393	-0.256277	0.183991	0.0887223	1.54869	2.16395	0.945488	-0.193299	1.08787	-0.631938	-0.468405	-0.128354	0.832493	1.1627	0.910709	0.542697	0.44612	0.14555	0.875322	-0.340082	0.258011	-0.695288	0.0041283	1.05441	1.4651	0.484207	-0.832548	0.252514	0.0631301	0.114209	0.583349	1.44727	-0.739048	0.379802	-0.266481	2.01128	0.0636834	0.76303	0.404309	-1.78751	-0.791752	-2.09043	1.03581	1.20725	-1.33378	-0.262649	-1.46677
MIA	0.0593798	-0.794297	-0.379239	0.160372	-0.51448	0.191586	0.0853859	0.25711	-0.326682	-0.15891	-0.659601	-0.151883	-0.320023	0.920104	-0.377956	-0.209633	-0.15171	0.221617	-0.35432	-0.271943	0.164008	-0.43668	-0.328076	-0.663356	-0.537769	-0.246099	-0.752869	-0.108731	-0.156872	-0.335144	-0.340036	-0.18671	-0.0491224	-0.0741509	-0.503837	1.24646	0.129688	1.32836	-0.453514	-0.217441	-0.412218	-0.134067	-0.476486	-0.276152	-0.0529844	-0.14677	0.750944	-0.0717069	0.762427
MIF	-1.26505	-1.25227	-1.38647	-0.594045	-1.56892	1.17461	-0.563149	0.334346	-0.96216	0.573645	-0.575993	-0.805817	-1.66968	0.861411	-1.64377	-1.0212	0.418779	-0.937727	-0.71665	-0.43905	-1.10567	-0.87147	-0.701531	0.566442	-1.54878	-0.597795	-1.26352	-1.10529	-1.96884	-0.216791	-0.830203	-1.17894	0.516119	-0.390174	-1.00643	-1.14348	1.14979	-1.07079	-1.2655	-1.32357	-1.23858	0.673493	-1.77352	0.257371	0.711247	-0.799499	1.70891	-1.72915	1.17574
MIP	0.00980733	-0.0300052	-0.169587	0.320159	-0.0727502	-0.0899641	0.266773	0.138672	0.193235	-0.237109	-0.0329782	-0.226273	-0.173204	-0.0144706	0.25316	-0.149794	0.001684	0.190325	0.336156	-0.0159607	0.201271	-0.241039	-0.0555652	-0.081022	0.202161	0.240312	-0.207187	-0.0676657	-0.0947318	0.0534362	0.0582222	-0.0523037	-0.168775	-0.201166	0.0237615	0.152635	0.0083606	-0.165985	-0.319811	-0.00627757	0.0248317	0.362261	-0.342783	-0.235078	-0.252316	0.0249801	0.220088	-0.241976	0.64773
MKX	0.266884	-0.066076	-0.204096	-0.0150632	0.0343357	-0.0889753	0.0827342	-0.208999	0.331325	-0.109298	-0.244499	0.0884008	-0.204498	-0.0649754	0.0468657	0.168472	-0.0458468	0.106519	-0.0480092	0.10761	-0.0180555	0.0275625	-0.00873103	-0.313965	0.00794322	-0.0427572	-0.229859	-0.0243238	-0.181764	0.135443	0.0364513	-0.140321	-0.122288	-0.167638	0.0165515	0.388706	0.108293	0.245703	-0.103431	-0.152668	-0.0826729	-0.133491	-0.0182659	-0.0644556	-0.0163604	0.0141231	-0.0676564	-0.0298242	0.285559
MLN	-0.208409	-0.346995	-0.232845	0.375792	-0.203861	0.4723	-0.0645906	0.0268196	-0.146658	-0.0974297	-0.172326	-0.103206	0.319533	-0.133403	0.0915153	0.0375315	-0.412066	0.153304	-0.139702	-0.090842	-0.116803	0.00198359	0.0477961	-0.207129	-0.373685	-0.147895	-0.127907	-0.227256	0.251464	-0.44805	0.3203	-0.265466	0.167074	-0.0865409	-0.107864	0.0820741	0.952494	-0.0772536	-0.362895	0.409955	0.080309	0.100494	-0.148519	-0.108434	0.0334808	-0.130239	0.145859	-0.0203692	0.367813
MLX	-0.295565	0.115414	-0.103434	0.228355	0.0154335	-0.11506	0.306183	0.121967	0.0959694	-0.386037	0.267234	0.227612	0.01289	-0.078472	0.22928	-0.145282	-0.0638336	0.167931	0.479631	0.120793	-0.345317	0.209062	-0.0199888	0.405694	0.195401	0.0782355	0.0211716	0.335414	-0.216451	-0.0664962	-0.0927629	0.529465	-0.0568746	0.111996	0.0272767	-0.202319	-0.187285	-0.0929846	-0.0950499	-0.262005	-0.246924	0.210834	-0.0705307	-0.0535889	-0.0786292	0.0270338	0.0405057	-0.0711037	0.346598
MME	1.04723	1.80096	1.62991	1.31866	1.22504	-1.14356	1.58904	-1.63978	0.60999	0.506105	0.0983696	1.53827	1.22531	-0.31055	0.762368	1.01253	1.55851	0.97671	0.479576	1.07538	1.3284	1.629	1.8478	-2.24986	1.53451	1.51438	0.0371241	0.711488	1.83629	0.424848	1.51672	0.145904	-1.49821	0.699568	1.18818	-0.138083	-0.618104	1.20439	1.52634	-0.482655	1.29855	-2.04478	1.0092	-1.54308	-1.13341	1.1973	-1.70071	1.64418	-1.11489
MMD	-0.215184	-0.559279	-0.148264	-0.136331	-0.0240471	0.506356	-0.187178	-0.256439	-0.368521	0.622454	0.118849	-0.0163867	0.00136673	0.009623	0.174321	-0.190849	-0.104844	-0.124838	0.0512683	-0.395027	-0.0665425	-0.0759824	-0.086091	-0.293596	-0.0543611	-0.0684398	0.0944139	-0.298751	-0.0258704	-0.343871	0.185593	-0.139237	0.380655	-0.405504	0.513641	-0.483925	0.746251	-0.555108	-0.255415	-0.631868	-0.00273713	-0.747441	0.323199	-0.548934	-0.193924	-0.00854526	0.262963	-0.171956	-0.283294
MN1	0.15896	0.986403	0.51821	-0.183808	0.838153	0.875457	0.176045	0.873293	0.606334	2.42263	-1.02284	0.22602	0.584704	0.334034	0.64961	0.000789	-0.369938	-0.158402	-0.241883	0.347521	1.06307	0.218162	-0.176208	1.32149	-0.0569181	-0.379012	1.35898	0.489819	-0.754512	0.229024	-0.257036	-0.550715	-0.805711	-0.219603	-0.167626	0.465379	1.0698	1.65891	1.51299	0.068225	0.357579	-1.14499	0.331145	0.197719	-0.3758	0.302435	0.333802	0.0846366	1.01544
MNT	0.0268269	-0.191818	0.235047	0.0386576	-0.0887121	0.099813	-0.0403267	-0.287144	-0.646132	-0.109848	-0.674243	-0.455062	-0.111515	0.132239	0.256451	-0.161231	0.254376	-0.100116	-0.0465298	0.301915	-0.0418289	-0.200295	-0.0849703	-0.141425	-0.10567	0.193831	0.0242441	-0.138812	-0.133391	0.207351	0.143803	-0.0224769	-0.229	0.0542519	-0.0218435	-0.251543	0.0772818	0.0692265	-0.0030713	0.27732	0.21906	0.0850018	0.248001	0.314429	0.366209	0.134348	0.465735	0.0963693	-0.0617505
MOG	-0.0952717	-0.0322748	-0.177621	0.114494	-0.0532942	0.139511	0.0150866	0.081481	-0.108412	-0.0869509	-0.000886717	0.0379896	-0.0224832	0.0856671	0.0013134	0.00425238	-0.0231114	-0.0540031	-0.0944459	-0.121289	-0.139077	-0.0844069	-0.108929	-0.17319	-0.0282481	0.0147149	-0.153732	-0.185493	0.126447	-0.0383879	-0.0465604	-0.0384486	-0.00317332	0.00260598	-0.0876459	-0.0590464	0.26677	-0.0806856	-0.0753759	0.134402	-0.067685	0.0644078	0.0769598	0.0403938	-0.0166559	-0.0165758	0.23067	0.138413	0.142206
MOK	0.767557	0.00214189	0.0869151	0.110801	0.139385	-0.374798	-0.145635	-0.0527905	1.72955	-0.416117	-0.50716	0.178552	0.214817	1.25417	-0.202986	0.376975	0.422668	-0.358314	-0.807342	-0.0155469	-0.0933114	-0.288741	-0.486918	1.27187	0.457174	0.253173	-0.143514	0.280257	-0.530673	0.242282	-0.277651	-0.511561	-0.472808	-0.538916	0.0418949	1.16862	0.319261	-0.00438396	-0.23537	0.624287	0.355362	1.07428	-0.135197	-0.915393	-0.507037	0.17156	1.57994	-0.352064	-0.396691
MOS	0.043605	0.0431115	-0.172568	0.374224	0.148835	0.0235108	0.153909	0.318728	0.304796	-0.0838599	-0.0360136	-0.0655842	-0.0399994	-0.0195522	-0.0732302	-0.0993195	-0.127058	0.276788	0.262117	-0.0862875	0.116713	-0.218965	0.0772702	-0.170649	-0.0774842	0.090472	-0.0140582	-0.152307	-0.0677093	0.189769	0.00421895	-0.295999	-0.432767	-0.237269	0.185671	-0.0078565	-0.243482	-0.117282	-0.188243	0.09982	0.100635	0.130794	-0.242039	-0.190808	0.141467	0.139759	0.594712	0.00675758	0.0483158
MPG	-0.340611	0.00078	-0.152983	-0.0643236	-0.373899	-0.165459	0.0140632	0.176253	-0.285493	-0.196822	0.066147	-0.131665	-0.362856	-0.0252061	-0.26072	-0.161247	-0.0266776	0.0797235	-0.388154	0.415205	-0.300579	-0.154565	-0.0434861	0.0479108	0.0769749	0.345926	0.13597	-0.212439	-0.559776	0.121511	-0.176416	-0.00804068	-0.165564	-0.0126349	-0.278495	-0.0734876	-0.206593	0.0726098	-0.219931	-0.235123	-0.267164	0.321878	-0.430683	-0.396078	0.0431029	0.0179533	0.391466	-0.541046	0.386942
MPI	-0.23199	-0.225039	-0.300171	-0.181422	-0.403673	0.0580286	-0.200434	0.389929	-0.375847	0.0228871	-0.324088	-0.0976752	-0.51646	-0.246217	-0.220681	-0.122032	0.0725914	-0.495646	-0.0899791	0.159871	-0.270192	-0.196696	-0.201957	0.129299	-0.0593619	-0.176479	0.041427	-0.260137	-0.442539	0.0201668	-0.286383	-0.221969	-0.0909927	-0.213947	-0.0481057	-0.303624	0.243034	-0.0694896	-0.209039	-0.520395	-0.150293	0.376686	-0.312454	0.272966	-0.211447	-0.0898192	0.108784	-0.203297	-0.0132208
MPL	0.287135	0.057755	0.0556308	0.208892	-0.0369569	0.0739328	-0.00482585	0.228159	-0.131971	-0.0109753	-0.00801051	0.152242	-0.0253238	-0.132444	0.0366058	0.11259	-0.167907	-0.166607	0.239973	0.0210742	0.20356	-0.173664	-0.0400367	-0.0944134	-0.129347	-0.122378	-0.149276	-0.304015	-0.0118266	-0.00374809	0.160435	-0.104967	-0.101465	-0.0390353	0.00181101	0.00611336	-0.124031	-0.0249687	-0.144013	0.164812	0.0480753	0.123944	-0.146313	-0.195562	0.0739587	0.287542	0.349782	-0.275068	-0.000977
MPO	-0.0227777	0.809896	-0.209434	0.144786	-0.313334	-0.214513	0.100296	0.234818	-0.237294	0.00749895	-0.0530449	-0.0163946	-0.112693	-0.0651172	0.225089	-0.107279	-0.0261182	0.223908	0.0193035	-0.0419167	0.175317	-0.188455	0.0877377	-0.0644814	-0.0201728	-0.17808	-0.0386427	-0.21778	0.128524	-0.160937	0.0638417	0.167417	-0.121959	-0.100138	0.10661	-0.0148373	-0.00750684	0.0242026	-0.224194	0.00561364	-0.284374	0.0441896	0.0120518	-0.242486	-0.134577	0.0458453	-0.0773324	-0.0365485	0.0802739
MPZ	-0.363626	-0.115289	-0.0592287	-0.152597	-0.249183	0.00626111	0.138086	0.367048	-0.120204	0.0642627	0.291453	-0.241797	-0.00645168	0.09374	-0.189215	-0.164259	0.06154	0.231873	-0.300618	0.239674	-0.117684	0.0458177	-0.425768	0.190571	-0.107627	-0.418157	-0.35544	-0.220123	0.0733774	-0.156115	-0.201363	0.0559514	-0.238027	0.028333	-0.354325	0.194441	0.327669	-0.00199295	-0.551181	0.652738	-0.487002	0.0447715	-0.160232	0.0429283	0.146701	-0.146772	0.190143	0.0418611	0.277082
MR1	-0.24382	-0.0209449	0.281656	-0.0808602	0.241052	0.467735	0.382313	0.233753	-0.0016663	-0.229403	0.31865	0.229331	0.0446712	-0.493117	0.289216	-0.0112551	0.157309	0.0128544	0.77116	-0.00769251	0.0164135	0.449728	0.210281	0.191604	0.521105	0.187144	0.270229	-0.0150128	-0.327426	-0.135316	0.185656	0.334524	-0.103556	-0.079889	0.205661	-0.167475	0.113586	-0.200604	0.183465	-0.230359	0.140641	0.349036	0.330603	0.293511	-0.274566	0.217608	-0.585217	0.0470737	-0.0759183
LY86-AS1	-0.0572721	0.12416	-0.034898	0.105048	0.0210029	0.0998507	-0.081531	0.0753409	-0.0672175	-0.0370795	-0.127436	0.084728	0.0387761	-0.0978655	-0.0848486	-0.0173316	0.0133449	-0.0458423	-0.0172949	-0.00386106	-0.0475267	-0.115844	0.057264	-0.0168899	0.0116343	-0.0435608	-0.0988715	0.017451	0.0788058	-0.0406313	-0.0611537	-0.121995	-0.162574	-0.134921	0.208763	-0.0102407	0.0998672	0.0267976	-0.162505	0.0354489	0.0926985	0.227771	0.0823765	-0.0287231	-0.0342468	0.0536925	-0.0422511	0.0595472	0.237173
MRO	-0.093232	-0.202241	-0.252415	-0.110131	-0.170722	0.159414	-0.064884	0.16527	-0.289453	0.123496	-0.00545921	-0.133948	-0.229138	0.109525	-0.0112511	-0.155959	-0.248939	-0.0415519	0.028251	-0.0903053	0.174576	-0.13899	-0.0110977	0.0731705	0.0164415	-0.0722944	-0.0207565	-0.138836	-0.117272	-0.121603	-0.170327	-0.40399	0.0870378	-0.201271	-0.234415	0.188867	0.150319	-0.228949	-0.12535	0.0102141	-0.012529	0.142073	-0.288465	-0.255748	-0.13661	-0.0926504	0.109632	-0.265026	-0.0473248
MSC	-0.224541	-0.11139	-0.0852888	-0.604535	-0.926229	0.312629	-0.116085	0.284543	-0.467612	0.546902	-0.0300479	1.68975	-0.849283	0.387747	-0.230076	0.0984979	0.602342	0.384667	-0.429157	-0.0700081	0.0613783	0.0381905	0.104503	0.251324	-0.796796	0.0285516	-0.229939	-0.287788	-0.147186	-0.154935	0.0907621	-0.369797	0.978267	-0.453264	0.493061	-0.235893	1.11524	-0.613998	-0.587079	-0.463294	-0.417224	-0.157915	-0.932268	-0.572244	0.433491	0.413631	0.781742	-0.33216	0.495897
MSN	0.269714	0.342605	-0.0551874	0.513075	0.177488	-0.173765	0.45665	0.107052	0.20254	0.253186	0.296433	0.293357	0.259487	-0.668301	0.0343133	0.0929494	0.316743	0.443773	0.34439	0.533174	0.242254	0.270345	0.591282	-0.127605	0.107929	0.450694	0.161117	0.42722	0.731522	0.333537	0.666131	0.13007	-0.0853943	0.353828	0.113454	0.245091	-0.130466	0.0372904	0.266954	0.486771	0.168906	-0.772753	0.114411	-0.435863	-0.225834	0.393753	-0.755374	0.270952	-0.385408
MT4	0.274044	-0.437647	-0.0643003	0.277687	-0.189046	-0.410455	-0.15795	0.463846	-0.269161	-0.00500701	-0.200466	0.0943114	-0.437672	-0.531522	0.0112671	0.132159	-0.095756	-0.126734	-0.35597	0.0292013	0.0490181	-0.330492	-0.236288	-0.397958	-0.326395	-0.0067162	-0.337963	0.395842	0.414339	0.149988	0.469167	0.0450104	-0.207632	0.477478	0.468053	-0.210296	0.152445	0.228729	-0.0861582	0.0863987	-0.197828	0.146394	-0.269404	-0.213422	-0.0671569	0.133191	-0.217357	-0.000407	-0.0126893
MT3	-0.074851	-0.745114	-0.410141	-0.0566674	-0.643277	0.266931	-0.121712	0.441394	-0.0161289	0.0462656	-0.501388	-0.383413	-0.37317	-0.203535	-0.325558	-0.049996	0.489704	0.108848	-0.398351	0.0822459	-0.261566	-0.171459	-0.457976	0.0643773	-0.280641	-0.359558	-0.396579	-0.242391	0.318224	-0.546867	-0.107046	-0.265485	-0.134847	0.0530846	0.128545	0.481396	-0.402817	-0.0192486	-0.429257	-0.050154	0.0903316	-0.200311	-0.0348677	0.00736242	0.117452	-0.402484	0.0690728	-0.0142357	0.364905
MTR	0.484281	0.296529	0.67374	-0.273304	0.470241	0.428912	-0.0501237	-0.416875	0.080622	-0.0789051	-0.0102389	-0.184298	0.172473	0.440214	0.350893	0.372988	0.0463607	0.0213034	0.141697	0.194846	0.232245	0.208284	0.17021	-0.217961	0.215071	0.079375	0.409485	0.150048	-0.324342	0.103666	0.105639	0.163177	-0.219311	0.183707	0.104212	-0.133379	-0.454477	0.657695	0.524005	-0.229983	0.334584	-0.300157	0.485044	0.196986	0.550667	0.152582	0.799884	0.542422	-0.858099
MUT	0.201386	0.400389	0.481502	-0.028254	0.518882	-0.0859492	-0.262378	-0.821248	0.280494	0.152204	0.137288	0.0564148	0.268035	0.437782	0.255903	0.275894	-0.112565	-0.498963	0.350747	0.263398	0.142045	0.277439	0.231068	-0.286823	0.152181	0.315683	0.184213	0.205962	-0.504136	-0.181711	0.00287859	0.410969	-0.516759	0.494502	0.198294	0.0499164	-0.426717	0.541954	0.450307	-0.698088	0.548669	-0.504364	0.445758	0.673335	0.477976	0.24109	-0.495166	0.497588	-1.41729
MVD	-0.460516	-0.00349199	-0.644083	0.0888684	-0.416176	0.0114003	0.121343	0.128505	-0.20462	0.0391023	0.0659277	0.406153	0.0424068	0.158038	0.288079	0.0383242	0.317245	0.121822	-0.284859	0.577775	-0.481113	0.167515	0.29109	0.352136	-0.275822	-0.227103	-0.566951	-0.361485	0.00895603	0.0814737	0.215143	0.433846	0.252273	0.280099	-0.164442	0.15524	-0.0165605	-0.386797	-0.491063	-0.109498	-0.19697	0.266177	-0.295263	-0.337979	0.157501	0.14479	0.686494	-0.281371	0.855768
MVK	-0.0718523	-0.273843	-0.238372	0.110375	-0.406095	0.0639689	0.0908748	0.237416	-0.19284	-0.0236843	-0.0360028	-0.0818647	-0.175788	-0.0837321	-0.238311	-0.08893	-0.180974	0.0421052	-0.0872484	0.0642368	-0.236485	0.0455089	-0.0765377	0.0354287	-0.224247	-0.101022	-0.289312	-0.198296	0.232323	0.0330136	0.0245089	0.26181	-0.0229762	-0.0229583	-0.391527	-0.136966	0.332113	-0.106031	-0.411222	0.317513	-0.205806	0.373077	-0.188894	-0.0887868	-0.0386327	-0.0550818	0.104818	-0.169559	0.358703
MVP	0.21175	0.202104	0.197287	0.639802	0.236812	0.190406	0.343905	0.408389	0.287438	-0.405036	0.350383	0.506327	0.539755	-1.00358	0.422448	-0.0727177	0.69315	0.562542	0.569875	1.09484	0.0706634	0.382339	0.467771	-0.0249804	0.74679	0.406513	0.438516	0.58241	-0.69313	1.0485	0.581612	0.826173	0.315141	0.446184	0.246358	0.253951	-0.908913	0.0319216	0.273972	0.644918	0.589792	-0.455271	-0.332086	-0.863659	-0.610298	0.714809	-1.69587	0.352464	-0.140822
MX2	0.108354	-0.198106	-0.814468	-0.07074	-0.555332	-1.15021	-0.426659	0.010816	-0.437061	1.44525	0.0214423	0.586797	0.0169963	0.542763	0.888503	-0.158959	-0.00423895	-0.787114	0.13386	-0.29193	-0.22801	-0.637619	-0.203086	1.16154	-0.476101	-0.87623	-0.612043	-0.164965	1.58303	-0.099568	1.09693	-1.53609	0.172808	-0.516626	-0.374354	0.0049563	-0.827525	-0.52057	-0.239533	0.0215744	0.195602	1.61893	-0.767526	-1.29323	-1.33427	0.55287	-1.78887	-0.952312	-0.140397
MX1	-0.37984	0.070229	-0.312367	0.554914	0.133203	-0.465275	0.0298965	0.235031	0.192129	1.72234	0.470848	0.894599	0.629795	-0.9422	0.840661	0.11945	-0.695509	-0.22164	0.422555	0.100145	0.343686	-0.264779	0.446151	1.42315	0.348208	-0.152415	-0.219332	0.299842	1.54395	0.161217	1.4811	-0.372319	0.00466406	0.0508802	0.0328483	0.478956	-0.96077	0.220366	-0.421362	0.518334	0.118726	1.89116	0.405556	0.316195	-0.389468	1.02468	-1.5272	0.1329	1.65787
MYC	-0.502945	1.44962	-0.824453	0.0961482	-0.383509	-0.718011	0.460688	-0.302988	-1.39722	0.0594407	0.179399	1.82691	-0.459284	1.6303	0.657318	1.2768	1.41496	0.874152	-0.0918193	-0.768257	-0.634763	2.11863	0.938281	1.22976	-0.0717928	-0.648952	-0.118939	0.413898	1.14428	-0.962089	1.01176	-0.060949	0.221786	0.00607478	1.26507	0.906156	0.510476	-1.53165	0.453621	-1.85439	-1.56211	-0.0305978	-1.0118	-0.393131	-1.24174	0.377264	1.10537	-0.0683754	0.354159
MYB	0.491486	0.192388	-0.172871	0.193026	0.590542	0.324726	-0.282802	-0.304042	1.29435	-0.53851	-0.556865	-0.524084	0.727869	0.462775	-0.165012	0.22604	-0.157545	-0.186666	0.372376	-0.0493214	-0.0813651	-0.844649	-0.62862	1.38492	0.239326	-0.51837	0.431427	0.45327	-0.84155	-0.208964	-0.502984	-0.453818	0.0648224	-0.476041	0.178839	0.713713	-0.152474	-0.400355	-0.0159444	-0.508327	0.443378	0.287265	-0.419351	0.194836	-0.473331	-0.265626	1.25666	0.176057	0.26959
MACROD1	0.0481587	-0.0319649	-0.21864	0.395464	-0.205832	0.172502	-0.249381	-0.162001	-0.126137	-0.146652	-0.218162	-0.197785	-0.0261418	-0.0988957	0.130761	-0.386804	-0.185145	-0.0439855	-0.381278	0.362677	-0.150386	0.0355669	-0.00949204	-0.366551	-0.319524	-0.0502375	-0.237505	-0.0288098	-0.304429	0.211032	-0.0784938	0.293742	0.0852596	0.0205272	-0.158575	-0.0201837	-0.0597337	-0.0577413	-0.0713603	-0.108524	0.277431	0.768146	-0.525246	0.142707	-0.209648	-0.0978155	0.207797	-0.203885	0.842987
NBN	-0.579803	0.0790704	-0.335175	-0.308493	-0.0196988	-0.413166	-0.104218	-0.390686	-0.22328	-0.0669143	-0.217412	0.0895984	-0.0261402	0.429623	-0.323042	-0.264842	-0.470797	-0.0915854	0.163628	-0.492142	0.161822	-0.0691727	0.199117	1.20284	-0.0394029	-0.0286447	-0.147445	0.36796	-0.145923	-0.567268	-0.331382	-0.191924	0.428877	-0.26272	-0.243177	-0.0155796	0.231078	-0.374975	0.231174	-0.313059	-0.636801	0.599441	0.515702	0.723058	0.995727	0.000204	-0.274828	-0.128053	0.00879142
MACROD2	1.20479	0.532513	1.47223	1.26074	1.18806	0.165753	0.6304	0.748276	0.95996	-0.11515	0.581746	0.439255	1.07567	-1.60802	0.927326	1.11367	0.0557963	1.41847	0.0343439	0.298743	0.956625	1.12811	0.82153	-1.38736	0.731145	0.745078	0.465868	0.0505747	-1.26978	0.845792	1.00426	1.5573	-0.107413	0.429043	0.972256	0.298096	-1.47591	0.919045	0.314643	-0.0407597	0.549067	-1.13086	0.880717	-1.64774	0.530283	0.309905	-1.5361	1.37374	-1.48562
NCL	-0.133319	0.228178	0.0213159	0.0320048	-0.101832	-0.14078	0.212886	0.0962605	0.134986	0.116708	0.11903	0.16462	-0.023556	0.239188	-0.11159	-0.00982713	0.245288	0.0150073	-0.127901	-0.125167	-0.263901	0.0739167	-0.169617	0.0945553	0.179584	-0.239616	-0.145403	-0.0178888	-0.0654425	-0.295601	-0.0538153	-0.00598575	-0.0866967	0.0645604	-0.171876	0.0854603	0.344914	-0.05597	-0.0506904	-0.0169719	-0.248836	0.381558	-0.142062	-0.108461	-0.0866761	0.0294203	0.214696	-0.0238746	-0.021965
ND2	0.206451	-0.356801	-0.472304	-0.103862	-0.426176	-0.781529	0.00609181	-0.0675346	0.0804601	0.472334	-0.0238614	0.234569	0.0849827	-0.842926	-0.438933	0.04602	0.206003	0.224179	-0.397471	0.119239	0.29468	0.574457	-0.0232304	0.18174	-0.410777	0.301473	-0.891374	-0.0947636	0.789276	0.400102	-0.0347455	0.857646	-0.0352842	0.495436	-0.355785	-0.0675346	0.0391081	-0.0089793	-0.845276	0.772735	-0.0336668	0.509413	0.188112	-0.344218	-0.489735	-0.22613	0.619439	0.346658	-0.208266
ND4	0.0467659	-0.211993	-0.0277378	-0.0801405	-0.00350596	-0.304572	0.0483112	-0.0129662	0.0964375	0.120154	-0.0315843	0.0994788	0.104441	-0.124007	-0.204386	0.0373792	-0.0156256	0.126709	-0.114187	-0.103026	0.107604	0.0085574	-0.0942985	0.0725406	-0.177188	-0.027552	-0.0753658	0.0700817	0.16882	0.124763	-0.0680128	0.245514	0.0512424	0.103989	-0.303372	0.0240082	0.0462637	0.102989	-0.250494	0.222506	-0.0972892	0.269775	0.130874	0.061512	-0.0766012	-0.0731904	0.265787	0.0616278	-0.0703642
ND6	1.00072	-0.210281	0.4031	-0.262387	0.947875	0.120231	-1.08021	-0.923583	0.529325	-0.658585	0.412848	0.0810308	0.93405	0.851654	0.21794	0.287676	-0.734999	-0.760445	-0.0169081	0.0872194	1.13916	-0.134501	-0.406804	0.747177	0.187835	-0.0568393	0.82272	-0.271581	0.845142	-1.79897	-0.323423	-1.65159	-0.860374	-0.773815	0.766691	0.0549889	0.808375	0.402738	1.30192	-0.0983332	0.878675	0.0575482	0.762712	1.2685	0.463312	-0.619829	-1.21074	0.719435	-0.902199
NDN	0.431266	0.610971	0.883087	0.654932	0.756452	-0.579938	0.469767	0.420876	0.760437	1.27482	0.678242	0.257233	0.481672	-0.573268	0.62394	1.08022	0.401017	0.685159	0.335257	0.845576	0.79021	0.416182	0.732855	-1.37715	0.553641	0.971928	1.12649	0.558401	-0.473077	0.853809	0.484746	0.235	0.140233	0.468186	0.23837	0.451277	-0.687192	1.03975	0.976943	0.42219	0.797733	-0.544846	-0.0899347	-2.4375	0.0201092	0.922111	-1.7397	0.349987	-0.978807
NDP	-0.136507	-0.17905	-0.126097	-0.089137	0.0894094	-0.179822	-0.25896	-0.160253	-0.297196	-0.00690278	-0.00505313	0.156344	-0.238804	0.239248	-0.0480422	-0.135329	0.114109	-0.201217	-0.0442923	-0.210826	0.17289	-0.219203	-0.281499	-0.0504206	0.231102	-0.268207	0.0153355	-0.0504206	-0.0453638	-0.0499484	-0.352139	-0.017403	-0.0504206	0.0683543	-0.053692	-0.0455841	0.189487	-0.103248	-0.0964573	-0.194733	-0.041229	-0.206899	-0.0504206	0.0825066	0.161059	-0.151822	-0.287367	0.0069427	0.323761
NEB	-0.328582	0.237776	-0.181362	-0.262921	-0.317007	0.962667	-0.367203	-0.319249	-0.345055	-0.0931182	-0.374805	-0.305661	-0.202576	-0.257719	-0.342829	-0.29491	-0.330288	-0.644236	-0.266084	-0.23678	-0.189937	-0.341393	-0.672366	-0.0122647	-0.0901928	-0.515081	-0.094686	-0.448634	-0.267297	-0.344954	-0.403727	-0.496378	-0.25133	-0.347433	-0.412449	-0.234683	-0.285369	-0.220388	-0.369776	-0.296063	-0.102971	0.790921	-0.462115	1.61824	0.054886	-0.352992	0.599548	-0.36262	0.579091
NF1	-0.113161	-0.183734	-0.0828794	-0.104753	0.0467219	0.352027	0.153867	-0.0345894	-0.213809	-0.0580604	0.0349263	-0.120867	-0.2374	0.125196	0.146368	0.0268691	0.134749	0.156726	-0.350306	-0.199477	-0.142159	-0.153026	-0.180267	0.117026	-0.010147	-0.0996954	-0.0353668	-0.19221	0.012743	0.0602428	-0.118966	-0.159589	-0.0398528	-0.13553	-0.0244519	0.0807128	0.184355	-0.197648	-0.0599471	-0.127127	-0.0885243	0.0593887	0.11233	0.0669856	0.116126	0.0711254	0.227883	-0.19747	0.0618657
NF2	-0.151749	-0.0767024	-0.165437	-0.00892519	-0.161804	0.0729743	0.0355354	-0.0356583	-0.241979	-0.10502	-0.259165	0.103166	-0.114349	-0.104667	-0.0700683	-0.148624	-0.00670792	0.0893126	0.0978523	-0.0627812	-0.232929	-0.0239747	-0.0160066	0.0666183	-0.0352248	-0.0432173	-0.0253021	-0.184507	-0.160694	-0.0802201	-0.0203923	0.086689	-0.19756	0.0704096	0.00825794	-0.0394411	0.344249	-0.172723	-0.18514	0.00750674	0.0555972	0.237902	-0.123997	-0.123377	0.0820559	-0.125876	0.285697	-0.277018	0.348454
NES	-0.332805	1.15694	0.0291262	0.898898	0.112065	-0.309218	0.484367	0.0155928	-0.0201347	-0.325834	0.550229	0.544204	0.157799	-0.179052	-0.257198	0.301393	0.40387	0.782575	0.122681	1.33065	0.158637	0.719814	1.0238	-0.286692	0.832747	0.969367	0.122689	0.513844	1.06398	0.808624	0.645695	0.452745	-0.431669	0.594486	0.546237	-0.227278	-0.815556	0.474097	0.288932	0.895563	0.174371	-1.25618	-0.101044	-1.10703	-0.734429	0.915718	-0.104497	0.0293549	-0.254486
NGB	-0.247704	-0.29632	-0.0694143	0.304192	-0.465178	0.149664	-0.0334656	0.362722	-0.400067	0.722391	-0.254031	-0.0168921	-0.420861	0.0331538	-0.0713559	-0.0632311	-0.113262	-0.134764	-0.215647	0.031629	-0.128125	-0.197951	-0.365965	0.17041	-0.516328	-0.328974	-0.345433	-0.30387	0.312309	-0.146011	-0.21044	-0.0944517	-0.208337	0.114855	-0.0658477	-0.0841341	0.716419	0.101056	-0.402629	0.177618	-0.341223	0.454163	-0.23586	0.288518	0.312568	-0.326837	0.194838	-0.0654199	0.32077
NGF	-0.687561	0.171629	-0.504204	0.152523	-0.188265	-0.214795	0.0321075	0.0816249	-0.381422	0.215236	-0.25733	0.126756	0.0914521	0.222069	0.238229	-0.152858	0.232528	-0.132241	-0.722777	-0.417081	-0.272764	-0.133405	-0.205356	-0.000743	-0.09295	-0.518335	-0.273019	-0.297269	0.137158	-0.326053	-0.525608	-0.383927	-0.123149	-0.269558	-0.144562	-0.270234	0.311609	0.0528474	-0.170777	-0.178832	-0.376245	0.368919	-0.43268	-0.263206	0.218391	-0.562183	1.23543	-0.261996	0.936349
NHS	0.173158	-0.427964	-0.065283	-0.582369	0.033907	0.639649	-0.638779	-0.57416	0.035789	0.510239	-0.407218	-0.644693	-0.320143	0.508534	-0.458458	-0.107508	-0.337006	-0.461724	-0.144479	-0.185716	0.0823399	-0.781918	-0.427288	0.595205	-0.166324	-0.491791	-0.140823	-0.439007	-0.992678	-0.584437	-0.618907	-0.235256	0.0577326	-0.457515	-0.343883	0.320615	-0.0586075	0.124196	-0.0645286	-0.787619	0.0998972	0.852364	-0.584861	1.21802	-0.081778	-0.648524	0.712216	-0.197415	0.0119544
NIN	0.0121208	-0.157646	0.0445857	-0.311459	0.0867154	-0.193528	0.0769123	0.406947	-0.146076	-0.118719	0.164159	0.129219	-0.242009	0.0572552	0.200758	-0.016568	-0.0704839	0.13076	0.118497	-0.0999645	-0.410719	-0.214124	-0.170521	0.355473	-0.0176152	-0.123235	0.12418	0.183326	-0.115427	-0.202924	-0.131898	-0.353263	0.272288	0.0958481	-0.171586	-0.199194	-0.0268931	-0.0922597	-0.0595511	-0.372662	-0.198528	0.0442571	-0.096473	0.156616	0.152751	-0.118517	0.177397	-0.173878	-0.509723
NLK	-0.0190067	0.28023	0.00360592	-0.247254	0.103164	-0.112665	-0.118476	-0.722504	-0.0561435	-0.803036	0.44659	-0.115371	0.361512	0.909315	0.0288557	-0.549963	-0.0271416	-0.423294	-0.0663188	0.0481247	-0.455814	-0.034381	0.0212061	0.221522	0.321792	0.479934	-0.44375	0.0936632	0.0400602	-0.296487	0.142676	0.125415	-0.401814	-0.256538	-0.227593	-0.769876	-1.03795	-0.34819	-0.20469	-0.299271	-0.508693	0.372342	0.193622	1.09756	0.291709	-0.00355456	0.0631858	-0.51095	0.251945
NLN	0.0625996	-0.639167	-0.257313	-0.17303	-0.291437	0.755634	-0.436281	-0.240326	-0.347694	-0.0299799	-0.331981	-0.274188	-0.152946	0.0566176	-0.0763838	-0.342546	-0.248862	-0.154542	-0.162765	-0.445503	-0.126753	-0.38063	-0.314033	-0.045225	-0.193949	-0.0120699	-0.0722884	-0.566647	-0.37896	-0.0044353	0.190089	0.0833617	-0.0698591	-0.298298	-0.207999	-0.341037	0.0734255	-0.212821	-0.155029	0.0107347	-0.00991908	0.125351	-0.0430682	0.726002	0.3175	-0.222057	0.475831	-0.0049932	-0.0492772
NMB	-0.474149	-0.00965805	-0.442049	-0.0348865	-0.0606066	1.89705	-0.0736033	-0.753143	-0.105247	0.787108	0.0786758	0.192784	-0.574975	-0.734647	0.393371	-0.717467	0.690907	-0.550793	-0.35322	0.14326	-0.534004	0.484589	0.185869	0.548438	0.10755	0.499467	-0.223694	0.582997	-0.345174	0.48151	0.205129	-0.362604	1.07072	-0.0952061	0.671834	-0.550982	-0.20136	-0.449871	0.348971	-0.722839	0.407798	-0.0929878	-1.04268	-0.581752	-0.489572	-0.659608	1.41504	0.407882	-0.065667
NMI	-0.122934	0.281682	0.199411	-0.299486	0.669456	-0.173108	0.330827	-0.176006	0.201707	0.439611	0.319779	-0.159107	0.379518	0.0201539	0.354599	-0.0743379	-0.0949535	-0.0617148	0.414842	-0.261416	-0.16347	-0.358977	-0.138391	0.563583	0.438428	-0.239066	0.305178	0.130084	-0.109914	-0.035927	-0.225668	-0.603852	0.776589	0.266774	-0.301107	0.157366	-0.0956514	-0.140798	0.345796	-0.606722	-0.246109	0.120434	-0.0132769	0.625667	-0.199344	0.315344	-2.20647	0.282761	0.411239
NMU	-1.58991	-1.39599	-1.8473	-1.23719	0.0625225	0.63122	-1.43711	-1.00855	-1.5395	2.87002	-1.29056	-1.32195	-1.87737	1.13704	-1.91605	-1.67493	-1.95913	-1.8929	-1.41888	-1.99643	-0.764785	-1.69039	-1.54087	0.190013	-1.61227	-1.45537	0.282166	-1.27395	-1.47044	-1.52395	-1.50648	-1.42713	0.819656	-2.00093	-0.988672	-0.774564	-1.19753	-1.18881	-0.657628	-1.75958	-1.23511	-1.00409	-1.67736	2.73268	-0.679542	-1.15806	-1.1869	-2.12991	2.37327
NNT	-0.329815	0.0114556	-0.115475	-0.33731	0.312652	-0.316767	-0.141689	0.0014017	0.0474168	0.46512	0.464029	-0.0165999	-0.154435	0.350683	-0.413572	-0.472639	-0.782222	0.0766538	0.331386	-0.442952	-0.411996	-0.141884	-0.164939	-0.0568711	-0.131033	-0.0341559	0.393065	0.445202	-0.367607	-0.156442	-0.211017	-0.0944527	0.219807	0.008841	-0.356962	-0.427869	0.187767	-0.137329	0.181754	-0.582877	-0.115837	0.0359306	-0.0369541	0.130834	-0.342018	-0.318968	0.228492	-0.221762	-0.643142
NOG	-0.112205	0.0565084	-0.011391	-0.323219	-0.121168	-0.35089	-0.348623	-0.0822746	0.266016	0.372444	-0.222392	-0.203113	0.0154296	-0.335698	-0.174267	0.0537427	-0.206091	0.296046	-0.518392	0.597962	0.224309	-0.284042	-0.00424362	-0.328517	-0.0926058	-0.0991348	0.624084	0.176755	-0.283593	0.160409	-0.250557	0.16167	-0.294931	0.0440546	-0.105757	-0.115381	-0.259534	0.0913061	0.221559	0.023611	0.157558	-0.462333	-0.154085	-0.482671	0.0815255	0.322005	0.117432	0.167365	-0.215803
NOV	-0.438167	-0.0233958	1.86743	-0.15983	0.571146	0.125951	1.3166	-1.18886	1.37912	-1.1787	3.5933	0.0121097	0.0506494	-0.112449	-0.29547	1.21267	-0.496291	0.0643886	-0.201539	-0.153729	1.48888	-0.197658	0.165219	-0.921553	0.209236	1.67672	-0.431124	0.343056	-0.22412	-0.0244146	-0.183723	-0.536322	-0.818948	-0.0641201	-0.0173575	0.345662	-0.421903	2.62147	0.848534	0.38468	0.555728	-0.906423	0.811358	0.0179292	-0.285135	0.11932	-0.933969	0.240032	-0.595462
NPB	0.0821791	-0.434769	-0.617882	-0.0202818	-0.319717	-0.212123	0.328424	0.752392	-0.295084	0.365094	-0.0791605	-0.341494	-0.307721	-0.29194	-0.342114	-0.519024	-0.52003	-0.19907	-0.491498	-0.107459	-0.119038	-0.0464094	-0.157581	0.0706232	-0.260194	0.0955975	-0.60258	-0.500871	0.0457358	-0.135325	0.179348	-0.406416	0.234088	-0.481187	-0.0612396	-0.259097	0.0142691	-0.261933	-0.23183	0.378516	-0.388587	0.308232	-0.368557	-0.343821	-0.0797835	-0.269802	0.838418	-0.224862	0.100597
NPL	0.44199	-0.982828	1.23111	-0.443567	-0.085252	1.80354	-0.00386621	0.257409	-0.310551	-0.338193	0.333026	0.46512	-0.762389	0.704498	0.565558	-0.672913	-0.0997742	-0.0206593	0.230252	-0.94738	-0.289951	0.0315323	-0.949969	1.48808	-0.137046	-0.648285	-0.21715	0.298726	-0.580823	-0.23436	0.281876	0.662547	1.00759	-0.173241	-0.138524	0.192116	1.36111	-0.454695	-0.265804	-0.920247	-0.267132	0.752831	0.52309	1.60898	1.58619	-0.0108876	-0.46279	-0.227834	0.500921
NPW	-0.225907	-0.140143	-0.363976	-0.187375	-0.454634	-0.161529	-0.147876	-0.0637673	-0.374557	0.646432	-0.496133	-0.209313	-0.289139	-0.11886	-0.0614208	-0.330755	-0.413631	-0.245746	-0.166496	-0.384885	-0.161748	-0.306017	-0.161748	-0.155197	-0.348575	-0.121994	-0.25962	-0.294149	-0.313323	-0.321052	-0.143468	-0.358205	-0.0426053	-0.186732	-0.0521285	-0.261211	0.0679715	-0.40036	-0.505228	-0.0493309	-0.218686	0.139801	-0.322983	-0.142895	-0.471721	-0.171173	0.537264	-0.253848	0.43825
NPY	-0.189592	-0.234534	-0.197831	-0.0145371	-0.246292	0.110055	0.104759	0.200167	-0.266262	-0.0280883	0.149245	-0.209873	0.109426	-0.160646	-0.293519	0.292553	-0.15002	-0.237025	-0.20591	-0.0584118	0.0231925	-0.13179	0.00266709	-0.10727	0.0528968	-0.46958	-0.438523	-0.333797	0.213546	-0.734874	0.208174	0.283661	-0.221556	-0.0400643	-0.284992	0.664563	0.165742	0.471035	-0.282128	0.51123	-0.0201029	0.405237	-0.459882	-0.0537407	-0.172777	-0.37023	0.0779249	-0.187385	-0.186967
NRK	-0.361254	-0.20917	-0.205532	-0.112808	-0.286192	-0.0740727	-0.20211	0.486022	-0.239967	-0.136635	-0.398032	-0.250071	-0.25341	0.211713	-0.171281	-0.104468	-0.233293	-0.228463	-0.219025	-0.198893	-0.225131	-0.343996	-0.201503	-0.350658	-0.161324	-0.244572	0.521937	-0.387893	-0.355011	-0.335162	-0.372005	-0.288437	-0.366755	-0.153994	-0.440173	-0.190394	0.158619	0.0469066	-0.414945	-0.240664	-0.202306	-0.287123	-0.209214	1.37674	0.551801	-0.346257	0.120168	-0.363081	0.0470581
NRM	-0.520581	-0.34655	-0.613249	-0.1539	-0.479322	0.414626	-0.124289	-0.0492381	-0.551474	1.23555	-0.155133	-0.348567	-0.510429	0.242738	-0.454302	-0.418537	0.0303999	-0.264699	-0.253962	0.199949	-0.209665	-0.24916	-0.180712	0.409591	-0.4155	0.0622299	-0.327017	-0.386205	-0.372306	0.0908797	-0.535012	-0.526208	0.0776901	0.101926	-1.09955	-0.208885	0.749855	-0.329742	-0.536602	0.346971	-0.217802	0.490336	-0.7182	-0.00859903	-0.361449	-0.0844345	1.4615	-0.444251	0.46037
NRL	-0.193228	0.172809	-0.0345562	0.125895	-0.359114	0.0745077	0.0391967	0.249705	-0.219059	0.152354	-0.176809	-0.130865	-0.190857	0.180334	-0.0351305	-0.0349744	0.36468	-0.0326207	-0.314256	0.0930326	0.176008	-0.0295945	-0.390021	0.0171235	0.204848	0.177132	-0.300134	-0.18987	0.0374482	0.292278	-0.033476	0.173962	0.0707496	0.0256359	0.0331366	-0.0713361	-0.107852	0.0256962	-0.21168	0.28787	0.112562	0.0910906	-0.0680906	-0.194634	-0.143988	-0.0840862	0.187377	-0.0626981	0.262065
NSF	0.793652	-0.458238	0.463726	0.239187	-0.148751	0.23858	-0.282872	-0.17538	-0.451791	-0.392185	0.291115	-0.339745	0.344149	-0.402874	-0.207185	0.115419	-0.49738	0.162535	-0.199284	-0.131682	0.762155	0.269748	0.213894	-0.529393	-0.858124	0.370258	-0.472112	-0.364555	0.0796066	0.0760895	0.646235	0.652972	-0.781449	-0.145563	0.344102	0.436237	0.286065	-0.00721959	0.0358512	0.566635	0.380765	0.145269	0.169928	0.560468	-0.356516	-0.182563	0.0769561	-0.287654	-0.105008
NTM	-0.107182	-0.312208	-0.172692	0.112511	-0.580953	-0.169441	0.364429	0.601798	-0.358489	0.60881	0.000158	-0.147462	-0.233941	-0.0725609	0.0799232	-0.0281297	0.0782627	-0.168869	-0.227259	0.229819	-0.203123	0.036352	-0.441394	0.104488	-0.272041	0.136702	-0.260246	-0.20786	0.327155	-0.143399	0.0200067	-0.25269	-0.0839722	-0.232894	-0.07794	-0.0269798	0.000158	0.0072881	-0.532384	0.0892481	0.000158	0.150706	-0.0833895	-0.351634	0.0614038	-0.0270201	0.0751892	-0.0333076	0.0979294
NTS	-2.04958	-1.3491	0.086443	-1.87333	-1.2525	2.44817	-0.437797	-1.28262	-1.84032	-1.87296	-1.55315	-1.91229	-1.82594	6.50553	-0.365843	-1.16898	-1.03339	-1.04328	-1.54506	-1.42644	-1.50401	-1.91627	-2.0124	5.6293	-1.48659	-0.938475	2.47328	-2.14358	-2.01224	-1.72368	-2.17691	-2.16372	-1.7157	-1.47065	-2.09272	0.553381	4.46274	-0.56537	0.499631	-2.09265	-1.409	7.32952	-1.97571	6.87548	6.47	-1.39498	6.73336	-1.44444	6.38646
NVL	-0.403642	0.135233	0.123926	-0.137033	0.177681	0.583158	-0.167724	-0.379185	0.213962	-0.186959	-0.260342	-0.60507	-0.136176	0.242918	0.0885525	-0.25972	-0.281141	-0.367512	-0.0435023	-0.276558	-0.659305	-0.566909	-0.422332	0.193458	-0.0489955	-0.460016	0.130982	-0.0812168	-1.23481	-0.147393	-0.753544	-0.103595	0.0495987	-0.314785	-0.496851	-0.168375	0.0548448	-0.221116	-0.0808978	-0.441032	-0.245883	-0.167567	0.0127446	0.160282	0.677136	-0.383311	0.845243	0.106148	-0.0181
NXN	0.167875	0.829747	0.521794	0.698096	0.512011	-0.286435	0.800383	-0.317773	0.152198	1.0421	0.225779	0.452388	0.35385	-0.156729	0.0729581	0.827655	0.675347	0.406811	0.0907057	1.03616	0.116932	-0.11113	0.948069	-0.58037	0.636335	0.481157	0.77661	0.571356	0.336698	0.516226	0.157617	0.273406	-0.189336	0.507213	0.446751	0.136835	0.00884345	0.704891	0.375338	0.92092	0.641051	0.378563	0.406374	0.00652291	-0.515399	0.64534	-0.349745	0.506988	0.0287085
NYX	-0.406264	-0.0108959	-0.250586	0.0089974	-0.324485	0.197066	0.0858837	0.307628	-0.458717	0.161561	-0.192342	-0.216089	-0.0137622	-0.195008	0.0668717	0.0872729	-0.017065	0.0122232	-0.172777	-0.214557	-0.101207	-0.0111699	-0.252212	0.168661	-0.0586311	-0.249184	-0.332014	-0.276517	0.215688	-0.119552	-0.0409814	0.00840955	-0.193551	0.220109	-0.0209701	-0.129583	0.612634	-0.145147	-0.2891	0.353705	-0.134969	0.235199	-0.090685	-0.307805	0.195272	-0.27053	0.248066	-0.277972	0.567207
OAF	-0.635327	-0.141856	-0.38232	0.0453939	-0.444388	-0.00488303	-0.0320073	0.880734	-0.15186	0.272819	-0.0683944	-0.0807359	-0.270491	-0.167127	0.454595	0.06134	0.232636	-0.294181	-0.434224	-0.0454561	-0.0785961	-0.121939	-0.486154	0.0265781	-0.259709	-0.180525	0.0885709	-0.237072	-0.0204802	0.152362	-0.338264	-0.379533	-0.0503517	-0.26908	-0.743025	-0.206204	0.0490186	0.0968532	-0.175095	0.224108	-0.283522	0.547029	-0.580793	-0.289563	0.173927	0.225997	0.206087	-0.553448	0.421386
OAT	-0.262735	0.0453411	-0.0376683	-0.452828	-0.131407	-0.606789	-0.127206	-0.0521195	-0.0210087	0.143593	-0.119877	0.0405126	-0.448316	0.414304	-0.194827	0.1118	-0.0105322	-0.176326	-0.435688	-0.656259	-0.096156	0.113748	-0.28679	-0.146355	-0.38264	-0.217325	0.0194234	-0.0621355	-0.287893	-0.472319	-0.40587	-0.241771	-0.100959	-0.241968	-0.344887	0.0937425	-0.2311	0.405431	-0.0988524	-0.492426	-0.0720211	0.405918	-0.890846	0.22827	-0.882952	-0.379794	-0.803106	-0.113169	-0.527834
INO80C	-0.126825	0.480221	-0.106056	0.274064	0.209584	-0.172325	0.253126	-0.146856	0.319853	-0.100966	0.958759	0.163651	0.222786	0.67147	-0.166404	0.0410661	0.0292166	0.0580673	-0.0274294	0.0371938	-0.128562	-0.048271	-0.0678981	0.332656	0.429447	1.31149	0.231742	0.309082	-0.283403	0.00552717	-0.0169646	-0.231856	0.00756222	-0.018265	-0.106733	0.191668	0.425092	-0.116303	0.366716	0.130754	0.354454	-0.070421	-0.151295	0.0999446	0.103575	-0.189307	0.131231	-0.0380638	0.385661
INO80B	-0.220768	-0.465	-0.424202	0.22337	-0.522129	0.123762	0.325147	0.663899	-0.201256	0.737876	-0.0894531	-0.515303	-0.44182	-0.273781	-0.215749	-0.472326	0.0816744	-0.478055	-0.223845	-0.369996	-0.302251	-0.0888542	-0.233639	-0.144555	-0.392047	-0.208009	-1.14317	-0.294205	0.406207	-0.0262751	-0.0785545	0.157815	0.0524243	-0.264011	-0.525762	-0.00530755	0.625326	-0.368003	-0.574265	0.225837	-0.443277	0.41064	-0.676641	-0.0637048	-0.22559	-0.526936	0.405954	-0.734354	0.725803
INO80E	-0.505723	0.103581	-0.222598	-0.00217858	-0.27455	0.567709	-0.565368	-0.348956	-0.380948	-0.162997	-0.0317662	-0.100071	-0.212573	-0.0317662	-0.0794822	-0.233213	0.0701187	0.0552922	-0.202449	0.789118	-0.459637	-0.139363	0.193274	-0.366539	0.0434492	0.0977756	0.0323904	-0.0473841	-0.746114	0.713193	-0.171338	0.438911	-0.0944736	-0.118034	0.00381898	-0.25191	-0.633078	-0.0999972	-0.129621	0.632675	-0.0993035	-0.0489869	-0.828207	-0.638415	-0.501966	-0.151483	0.466467	-0.757346	1.0053
INO80D	0.242198	-0.0660347	-0.417393	0.149639	-0.0202443	-0.102423	0.190095	-0.15581	-0.149951	-0.195749	0.0772796	0.34739	0.237791	-0.0901348	-0.297509	-0.099048	-0.274353	0.0453283	0.0714978	-0.409287	0.262751	0.256739	0.123546	0.100391	-0.000960975	0.209703	-0.34356	-0.413667	0.632958	-0.0149588	0.00691534	-0.0315568	-0.0143634	-0.133904	-0.135538	-0.00396268	0.351274	-0.169252	-0.351238	0.129985	-0.131605	0.220001	0.320294	0.0715102	-0.0562129	0.00509048	-0.0445127	-0.164906	0.322004
OGN	0.318962	1.52151	2.90234	0.291064	2.46042	-2.64329	3.01969	1.08267	3.13283	-0.30346	1.07158	0.911332	1.52688	-0.55619	2.67838	1.81979	1.93929	1.18367	1.45935	1.00588	4.18458	1.44509	1.04399	-2.9366	1.04978	1.18467	2.98889	2.47455	-0.843985	1.16829	0.357986	-0.693074	-1.62591	1.52165	0.437489	2.52701	-1.52512	4.36851	2.63386	0.185022	1.214	-2.36831	2.35094	-2.60607	-0.592871	2.32331	-2.78017	1.68221	-2.529
OGT	-0.0203634	-0.0610142	-0.221987	-0.456696	0.468238	-0.118733	0.0823886	0.250931	0.0997492	-0.0805733	0.424777	-0.132628	0.209636	0.462422	-0.0609708	-0.444198	0.0994865	-0.269157	0.774086	-0.910059	-0.439401	-0.209167	-0.366072	0.368757	-0.0965026	-0.177763	0.146735	0.428699	-0.153762	-0.0800648	0.039042	0.0582596	0.284931	-0.139266	0.0876291	-0.329722	-0.798101	-0.306097	-0.12812	-0.78754	-0.120387	-0.696766	0.0560732	-0.244489	0.0729351	-0.134331	-0.0474108	-0.267441	-0.446266
SMIM10	-0.058591	0.455331	0.304363	0.395975	0.161887	-0.21461	0.109809	0.083344	0.335933	0.0329295	0.370318	-0.03166	-0.206714	-0.378439	0.277881	0.178773	-0.171867	0.191465	-0.156842	0.372887	0.841125	0.396433	0.546798	-0.235508	-0.0743604	0.232813	-0.198438	0.198805	0.156987	0.0378614	0.013078	0.385286	-0.42188	-0.1335	0.327109	0.17326	-0.570811	0.695309	0.158705	0.329409	0.0834923	-0.153134	-0.11595	-0.299522	-0.211971	0.332164	-0.15838	0.335933	0.0495518
SMIM12	-0.033481	0.0806223	0.220775	0.225811	-0.242527	-0.267561	0.0924474	0.152539	-0.264986	-0.317592	0.0690222	0.226747	0.230091	-0.268615	0.109121	0.01776	0.360536	0.0906072	0.0327049	0.308872	0.216968	0.104245	0.229468	-0.349732	0.125741	0.45434	0.023432	-0.0425258	-0.175247	0.219633	0.416914	-0.199402	-0.115262	0.0572147	0.214508	0.0168216	-0.22334	0.0247354	0.0467691	0.0865892	0.355605	0.0249837	-0.178739	-0.351427	-0.430871	0.342913	0.338201	-0.0971736	0.258384
SMIM11	-0.296855	-0.186178	0.0365554	0.0179264	-0.229671	0.0136373	0.0462429	-0.0116041	-0.0807717	-0.125931	-0.151156	-0.139157	-0.290604	-0.142987	0.162221	0.102807	-0.238492	-0.00975244	0.109773	0.0179181	-0.373389	0.0110354	0.210333	-0.0911443	-0.179201	-0.357352	-0.126979	-0.126435	-0.259844	-0.148737	0.213123	0.157625	-0.0023167	0.226315	-0.0631607	0.239892	0.0919036	0.185624	-0.121947	-0.122271	-0.240344	0.440392	0.00211578	-0.374984	0.319244	-0.0746871	0.45463	-0.152398	-0.254292
SMIM14	0.531753	0.415826	0.0597172	0.110222	0.346617	-0.547015	0.186373	0.400946	0.855985	-0.116947	0.430288	0.166914	0.5345	-0.617847	-0.17377	0.419616	-0.113733	0.304393	0.580878	0.120357	0.523185	0.441216	0.431567	-0.492196	0.184209	0.337332	-0.0317566	0.19319	-0.217459	0.109169	-0.135679	0.568302	0.534296	0.122647	-0.17122	0.687552	-0.907329	0.275707	0.376318	0.0145439	0.0604372	-0.171057	0.464836	-0.344879	-0.14012	0.447361	-1.7714	0.32208	-1.26166
SMIM13	-0.605032	-0.00593444	0.0323555	-0.552765	0.0425383	-0.270714	-0.395618	-0.648817	-0.41504	0.332249	-0.114129	-0.22626	-0.476445	0.800524	-0.224121	-0.0928235	0.299902	0.0876417	-0.242166	-0.309878	-0.553678	-0.283153	-0.322433	0.0801791	-0.166341	-0.246821	-0.10914	-0.567274	-0.470227	-0.419825	-0.268867	-0.613224	0.0503899	-0.172342	-0.0473438	-0.712433	0.245667	-0.207143	0.114836	-0.619128	-0.272143	-0.303084	-0.204518	0.902707	-0.304061	-0.0975974	0.148905	-0.270973	0.049984
SMIM15	-0.270986	-0.149244	0.0993709	-0.291994	0.110555	0.0207325	0.121165	-0.0915652	0.17975	0.0546483	-0.16883	-0.257407	0.0455564	0.482024	-0.03681	-0.313614	0.0214384	0.118044	0.194734	-0.486401	-0.387173	-0.0198004	-0.704276	-0.222453	-0.268091	-0.66967	0.0965493	-0.234493	-0.888007	-0.535708	-0.723505	-0.0592494	0.788574	0.0905319	-0.690336	-0.163326	0.4325	-0.235354	0.0223281	-0.714836	-0.39749	-0.151616	0.155706	0.557994	0.485655	-0.574443	0.0573739	0.168377	-0.766256
SMIM17	0.309071	0.0179746	0.0580116	-0.0758075	0.60409	-0.237584	-0.270375	-0.264907	-0.0219555	-0.0820176	0.0313384	-0.177413	0.133877	-0.268074	0.236933	-0.0116464	0.0398409	0.0709333	-0.157964	-0.119403	0.00628992	-0.430389	0.394433	-0.111633	-0.0851239	0.440829	0.215252	0.0735685	-0.325711	-0.0100311	-0.111458	-0.350651	-0.211599	-0.101665	0.00874852	-0.0490486	-0.149765	-0.00773591	0.256982	-0.218579	0.420617	-0.218352	-0.101906	-0.274747	-0.180701	0.0674746	-0.459348	-0.0174233	-0.444731
SMIM19	0.303121	0.220348	0.43115	0.330255	0.000729	0.101743	0.199327	-0.19813	0.520842	0.441588	-0.23927	0.124824	0.170643	0.488125	0.503445	0.291193	0.0302898	0.238149	0.0603342	0.446249	-0.0639014	0.159623	0.0118304	0.00236006	0.0632774	0.029129	0.108707	-0.0518566	-0.285751	-0.446137	-0.29332	0.2097	0.297799	0.552842	-0.302387	0.335683	-0.0205088	0.606542	0.0355461	-0.0102314	0.335421	3.05816	-0.18863	-0.151032	1.28399	0.015063	0.978493	0.170979	-0.227131
SMIM21	-0.170284	-0.0859211	0.0604189	-0.114968	-0.120265	-0.00674886	-0.0760273	0.176576	-0.0701212	0.157016	-0.151887	-0.0275109	-0.149081	-0.0130411	-0.10348	-0.0220117	-0.0709288	-0.145603	-0.187295	-0.148548	-0.114362	-0.0621371	-0.066856	-0.123983	-0.0332795	-0.0755289	-0.252168	-0.173555	0.0539552	-0.184136	-0.201189	-0.116781	-0.107203	-0.0700898	0.0201782	0.148522	0.347994	-0.00569	-0.206588	0.143	-0.0387191	0.179313	-0.0879732	-0.0217888	-0.128397	-0.139822	-0.194823	0.119303	0.0812792
SMIM20	-0.259456	0.043706	0.0649923	-0.334216	0.24959	-0.43082	-0.361619	-0.117953	0.0907629	0.440825	0.0654008	-0.249397	-0.247698	0.164054	0.148934	0.14322	-0.189666	-0.37641	0.0144863	-0.308289	-0.120845	-0.0682155	0.116793	-0.133882	-0.274143	-0.146484	0.174583	0.0255712	-1.19756	-0.121743	-0.115586	-0.150377	0.00186323	-0.104111	-0.0462203	-0.00301156	-0.550759	0.327806	-0.102259	-1.33174	-0.0882338	0.326911	-0.254581	-0.861489	-0.484956	-0.434681	0.0501131	-0.126041	-0.300207
SMIM22	0.0426722	-0.157612	-0.572206	0.376106	-0.326754	1.96989	-0.347571	-0.225511	0.51536	-0.926471	-1.09229	-0.0646582	0.0264432	-1.46765	-0.322415	-0.101994	0.0940663	-0.333284	-0.497956	0.0315507	-0.548753	-0.11877	0.219858	-1.65461	-0.268228	-0.373665	0.131953	0.179215	-0.536825	0.286832	-0.232211	0.140599	0.411568	-0.0865679	0.0738378	0.539694	-0.995974	-0.162526	-0.181187	-0.335285	-4.85e-05	-1.59787	-0.6042	-0.575045	-0.937194	-0.44788	-1.02356	-0.141847	-1.28866
SMIM24	-0.686778	-0.636928	-0.39493	0.0166697	-0.702774	-0.445981	0.0196201	0.485703	-0.756312	0.0375411	-0.186912	-0.460357	-0.444075	-0.050056	-0.390565	-0.0231078	-0.228868	-0.342208	-0.201083	-0.217265	-0.358799	-0.309902	-0.245085	-0.185076	-0.664177	-0.475496	-0.769963	-0.485086	-0.109171	-0.433932	-0.451938	-0.404184	0.130368	-0.380946	-0.283052	-0.165793	0.496705	-0.419416	-0.676713	0.327456	-0.382882	0.0456947	-0.181471	-0.145205	-0.0282365	-0.196328	0.323729	0.0353064	0.00953107
OMD	0.0405464	1.15994	1.02849	-0.662941	0.863542	-1.15109	1.53805	-0.932343	1.54267	1.54589	-0.150068	0.192316	0.163159	1.02397	1.82605	0.61319	-0.401338	-0.044095	-0.20925	0.201755	2.07608	0.746032	0.348306	-1.46501	-0.183687	0.702219	1.61976	1.86085	-0.545865	-0.197778	-0.196749	-1.01995	-1.26365	0.553559	-0.761866	1.61151	-0.264565	2.57708	1.8945	-0.936614	0.184861	-1.02895	-1.05825	-1.38502	-0.521417	1.35973	-0.759293	0.0520851	-0.451059
OMP	-0.266467	0.0180891	-0.203543	-0.215944	-0.29859	0.019245	0.357842	0.277445	-0.601512	0.291698	0.0616453	0.220878	-0.216898	-0.189512	-0.176986	-0.177543	-0.0964562	-0.255421	0.291018	-0.000719	0.058871	0.0867856	0.186377	-0.127013	-0.0525254	-0.0859164	-0.364455	-0.0817527	-0.236143	-0.186533	0.680027	-0.214141	-0.218143	0.190055	0.254597	0.221983	-0.113264	-0.164626	-0.224114	0.384683	0.126642	0.0675947	-0.352178	-0.421066	-0.29291	0.271062	0.431751	-0.0449514	0.283735
OS9	-0.326266	-0.0915311	-0.120742	0.457366	-0.305851	0.0338013	-0.0747063	0.452536	-0.225771	-0.109014	0.0697845	0.00694113	-0.192916	-0.0511701	0.25499	-0.176231	0.222763	0.0655738	-0.0436153	0.69844	-0.126424	-0.0026511	-0.073131	0.0428627	0.137438	0.109594	0.0505208	0.182493	-0.386806	0.41027	0.154096	0.167851	-0.0594399	0.109792	-0.348237	0.0803713	-0.159608	0.158473	-0.132923	0.125519	0.0277339	-0.781919	-0.649584	-0.672762	-0.784667	-0.0392607	-0.668572	-0.223895	-0.0173
OSM	-0.205088	0.536268	-0.307328	0.239014	0.184679	0.491688	0.157414	-0.0341603	-0.571149	-0.0147704	0.345555	1.81697	-0.757177	-0.0187076	0.938524	0.103337	0.531577	0.108832	-0.385678	-0.552558	0.135746	0.148844	0.189991	-0.379804	-0.083876	-0.501834	-0.403512	-0.17248	1.11163	-0.635376	0.143593	-0.297452	0.646548	-0.0128264	0.622238	0.919104	0.117375	-0.550304	-0.130759	-0.307225	-0.602791	0.232712	-0.197262	-0.86698	-0.466882	0.387054	0.0957234	-0.775452	0.0448436
OTC	-0.209424	0.263748	0.221781	-0.195792	0.134527	-0.181926	0.743146	0.263064	0.0665343	-0.217548	0.230354	-0.00288889	-0.0436657	-0.103402	-0.0681446	0.591479	0.173495	-0.0264061	-0.219777	0.0795015	-0.0851546	0.138506	0.176231	-0.261359	-0.00859934	-0.369424	0.575829	0.276172	-0.167624	0.262377	0.00253932	-0.0681025	-0.225146	0.206964	-0.0939444	-0.121154	-0.0215696	0.344015	0.583671	0.430423	-0.0217675	-0.0157234	-0.144009	-0.160618	0.149578	-0.241503	-0.0571845	0.0221187	-0.219917
OTP	-0.211513	-0.106666	-0.0257998	-0.0729433	-0.279918	-0.150314	0.0497523	-0.090195	-0.125909	0.0245605	-0.189589	-0.265409	-0.0623902	-0.000730454	-0.0729738	0.0192297	-0.0689716	-0.189672	-0.00521471	-0.0632558	-0.109031	-0.175123	-0.284008	-0.106877	-0.235981	-0.223747	-0.203004	-0.149713	-0.109053	-0.311182	-0.305072	-0.239999	-0.101912	-0.284307	-0.131284	-0.0507338	-0.0648668	-0.215359	-0.228669	-0.137772	-0.192602	0.0586091	0.019876	-0.149794	0.0686512	-0.327767	0.335976	-0.16981	-0.190043
OXT	-0.392744	-0.493479	-0.172104	0.0751774	-0.479134	0.146666	0.283484	0.41136	-0.163716	-0.0364471	0.179705	0.00123179	-0.204098	-0.348634	0.0463083	-0.0782907	-0.0892664	-0.19006	0.00266218	-0.113798	-0.169736	-0.309953	-0.313955	0.0176342	-0.211368	-0.154552	-0.217194	-0.289134	-0.0183695	-0.243388	0.162542	-0.0851877	-0.0463026	0.0662412	-0.324251	-0.0698799	0.0467064	0.0127571	-0.309691	0.180855	-0.340201	0.171358	-0.38123	-0.644719	-0.179553	-0.115212	0.451788	-0.356286	0.048112
PAM	-0.101071	0.101343	0.266824	-0.230894	0.109037	-0.750508	-0.016665	-0.535077	0.284922	0.355723	0.197833	-0.171624	0.176012	-0.563785	0.24998	0.369629	0.103057	-0.093209	0.0497117	0.112951	0.118659	-0.126328	0.0555589	-1.26859	-0.0410848	0.0666277	0.789454	0.142714	-0.143358	0.0899162	-0.176397	0.0501738	-0.662873	0.0634702	-0.355357	-0.0604365	-0.601408	0.585629	0.406561	0.10919	0.0485141	0.198148	0.483463	-0.203779	-0.338492	0.275574	-1.18182	0.244432	-1.01577
PBK	-2.39424	-2.36054	-2.35496	-2.17934	-0.939723	2.26124	-1.85773	-0.904426	-1.99309	0.841497	-0.108132	-2.17298	-2.20376	1.44582	-2.4201	-1.98062	-1.96631	-1.63485	-0.820253	-2.50505	-1.9078	-2.33955	-2.35434	3.01844	-1.65498	-1.55956	-0.478636	-1.99911	-2.17996	-2.22421	-2.05486	-2.17949	0.677357	-1.98003	-2.16938	-1.99063	1.60774	-2.30852	-1.80558	-2.60836	-2.4921	1.25947	-2.03237	2.9657	1.51696	-1.71556	3.59536	-2.15807	1.98366
PDC	0.0036872	0.0643212	-0.161679	-0.113556	-0.00175669	0.316145	-0.0598942	-0.0781354	-0.0302373	-0.0900655	0.037711	-0.0433605	-0.118054	-0.0803235	-0.174183	-0.209599	-0.158646	-0.00548246	-0.159765	-0.119087	0.00335165	-0.11255	-0.0211773	0.316359	0.0809804	-0.268288	0.0689236	-0.174753	-0.0832038	-0.0545789	0.329627	0.0191396	-0.0151635	-0.018384	-0.0193762	-0.00687253	0.166184	-0.101396	0.0913993	0.0719369	-0.10918	0.926335	-0.0456292	0.125416	0.0617929	0.0867973	-0.025093	-0.182539	0.207119
PF4	0.520859	0.46814	0.482242	0.47813	-0.0112901	0.00987732	0.238778	-0.135098	0.277894	-0.776867	0.00417571	0.519562	0.111391	-0.692767	3.07712	0.705215	-0.0345051	0.0943549	0.178261	0.396213	1.78066	-0.327205	0.642857	-0.579254	1.05422	-0.262988	-0.3987	0.411941	4.03819	0.856686	0.847166	0.870633	-0.668203	0.247488	1.15288	0.802054	-0.931488	-0.158634	-0.605476	0.56301	1.43971	-0.409154	-0.315403	-0.758883	-0.930382	2.25424	-0.162637	-0.100001	-0.571869
PGD	-0.14284	-0.121721	-0.0300745	0.156444	-0.273904	0.264045	0.225025	0.0554822	-0.0968558	-0.0228831	0.0526336	0.0109054	-0.26916	-0.0290111	-0.0783973	-0.0388275	-0.129662	-0.232318	-0.0520395	-0.122223	0.118122	0.0391406	-0.222821	-0.0856778	-0.254875	-0.0874713	-0.249971	-0.214805	0.183079	-0.27081	0.0180499	-0.139056	-0.0448406	-0.0350128	-0.072262	-0.220342	0.483215	-0.30565	-0.265118	0.374564	0.0483626	-0.0916162	-0.281877	-0.223667	-0.206805	-0.0451601	0.397855	-0.141648	0.574072
PGC	0.665234	1.1949	0.0756495	0.97033	0.231961	-2.48653	3.16223	1.37186	0.822643	-1.80443	0.600334	2.28837	1.906	-3.39163	0.20189	0.146784	0.635572	3.33215	1.34146	1.89697	3.16288	3.80297	2.37631	-2.71504	0.636119	1.44701	1.87387	3.71093	0.184688	1.39383	1.19362	3.71835	-1.84387	1.46275	2.18684	0.565018	-2.69275	-0.431452	2.24075	1.05203	2.95223	-2.61223	-0.556718	-3.23594	-1.5459	2.57377	-2.17708	1.43269	-2.64571
PGF	-0.352539	-0.548863	-0.644371	-0.247373	-0.585755	1.50168	-0.320058	0.255445	-0.611882	0.679801	0.914847	-0.468734	-0.147836	0.227034	-0.491799	-0.222305	-0.218098	-0.0169526	-0.79723	-0.297775	-0.144261	-0.379457	-0.454579	0.209862	-0.747799	1.29683	-0.064536	-0.287185	-0.179952	-0.545697	-0.537541	-0.274347	0.470338	-0.45216	-0.483416	-0.253766	0.912771	-0.167312	-0.280353	-0.0642062	-0.269673	0.518776	-0.131938	0.470068	0.337064	-0.389037	0.671701	-0.242718	0.967934
PGP	-0.337107	0.157336	-0.110441	-0.0411314	-0.612788	0.461345	-0.294868	-0.35861	-0.52436	-0.384801	-0.62186	-0.410628	-0.163409	0.440914	-0.0239416	-0.528093	-0.405225	0.0187057	-0.161297	0.498003	-0.205901	-0.340584	0.128636	-0.0225845	0.137463	0.0738639	-0.070485	-0.431805	-0.597479	0.332245	0.17194	0.0428496	-0.335218	-0.123587	-0.145847	-0.171579	-0.0854921	-0.179082	-0.350001	0.17383	0.403337	0.354435	-0.26286	-0.111579	-0.0604688	0.072355	0.274125	-0.154837	0.399454
PGR	0.345873	1.20836	1.02252	0.159671	1.04158	-0.474699	0.537046	-0.0598683	0.922247	-0.184516	0.553587	0.412587	0.548147	-0.596208	0.437528	1.09514	0.33304	0.564599	0.405825	0.7421	0.881227	0.369553	0.795488	-0.72666	0.417016	0.669647	1.18452	0.63302	0.125782	0.135877	0.261667	-0.0386371	-0.496346	0.434993	0.431971	0.618825	-0.573591	1.07786	0.822814	0.160805	0.421602	-0.909904	0.300658	-0.967998	-0.209027	0.582979	-0.567058	0.521549	-0.613251
PHB	-0.584177	-0.119211	-0.392282	-0.216425	-0.430294	0.261316	0.00909955	-0.119133	-0.237734	-0.70863	-0.0472994	-0.134116	-0.319663	0.119445	-0.368844	-0.506169	-0.248924	0.00748	-0.211808	-0.0765722	-0.997148	-0.325351	-0.175424	0.275341	-0.0768082	0.156496	-0.319409	-0.237492	-0.993937	0.0435105	-0.36825	-0.301585	-0.0187552	-0.089467	-0.37536	-0.218261	0.364245	-0.278953	-0.213367	-0.787616	-0.596146	-0.0393757	-0.659935	0.106261	-0.82746	-0.20424	0.707739	-0.269794	0.190525
PI3	-0.663019	-1.45516	-1.32197	-0.827884	-1.35814	2.85343	0.144412	-0.631976	-0.161724	5.52646	-0.113761	1.43215	-1.24709	0.863925	-0.88052	-1.18977	-1.02302	-0.989365	-0.962208	-1.41673	-0.588659	-0.258384	-0.195892	4.73975	-0.832929	-1.49741	-1.33297	-1.08133	-0.634531	-1.16329	-0.140463	-0.153771	3.17759	-0.149986	1.16506	-0.83374	-0.683782	-0.87707	-1.39818	-0.957324	-1.30694	-0.885424	-1.41366	5.49343	-0.889453	-1.1121	-0.250362	-1.48939	6.0445
PIP	2.2091	-1.35962	-0.959076	1.21408	2.03893	-0.475531	-0.827534	-0.919103	4.7826	-0.939592	-1.04914	0.392646	3.37434	-0.700031	-1.30973	1.97263	0.315564	0.273545	-0.467129	0.846109	0.607298	-1.06561	-1.36337	-1.15915	0.600677	-1.32732	-0.542556	1.27539	-0.746531	1.17084	-1.28956	-0.549481	0.931727	0.263707	1.04546	1.74586	-1.12348	7.70352	0.892808	0.477632	0.174791	-1.16188	-0.930578	0.204035	0.0859242	-1.30778	-0.835369	-0.0810216	-0.848245
PIR	-0.0826764	-0.11332	0.138072	-0.508844	-0.0524539	2.29122	0.257334	-1.62539	0.210413	-0.737488	-0.362708	0.496193	-0.599168	1.86494	-0.811421	0.328701	-1.17168	0.161223	-0.901072	-0.0564784	-0.557138	-0.53932	-0.0878239	1.09136	-0.381049	0.117905	-0.404008	-0.703276	-1.04248	-0.662443	-0.537625	-0.0830755	-0.175096	0.366877	0.0950542	-0.332418	2.07263	0.293151	0.100171	-1.2093	-0.682575	1.0399	-0.13189	2.74072	1.89482	0.0446585	2.30703	-0.623724	1.60455
PKM	-0.953611	-0.91995	-0.924244	-0.238425	-0.962992	1.16695	-0.850545	0.104265	-0.942123	0.108063	-0.551483	-0.47404	-0.81012	-0.546926	-0.148977	-0.689122	0.312346	-0.0533847	-0.810819	-0.246514	-0.967584	-0.592887	-1.0155	-0.099935	-0.538666	-0.692942	-0.539094	-0.902626	-0.96344	0.355883	-0.4112	0.0237443	1.20036	-0.184053	-0.255021	-0.253296	0.89339	-0.629474	-0.598946	-0.0352326	-0.644111	1.36592	-0.87002	0.259446	-0.210222	-0.479156	0.472248	-0.877395	0.69806
PLG	0.115922	-0.303014	-0.328541	0.242655	-0.0730077	0.362152	-0.0231525	0.309447	0.208403	-0.0559118	-0.106205	-0.209742	-0.208244	0.182219	-0.0140616	-0.0213125	-0.263255	0.0888257	-0.101921	-0.086852	0.165021	-0.0842143	0.0198825	0.0330567	-0.152403	-0.0883103	-0.390333	-0.084239	0.0949199	-0.0924835	-0.00790985	-0.264775	0.0056869	-0.163232	0.0294119	0.0272418	0.311735	-0.105714	-0.134703	0.497366	-0.0276422	0.254162	-0.0205401	-0.202666	-0.0817921	-0.31181	0.127138	-0.0940671	0.642289
PLN	0.150499	0.245107	2.51093	0.399476	1.37886	-1.32626	1.55827	-0.0907019	2.7808	0.830472	-0.922412	0.804996	1.70264	-1.61359	-0.46178	1.89867	0.472509	0.366251	1.14175	0.256937	2.4977	1.20181	1.02313	-2.7047	0.482496	0.0181155	1.22902	2.4872	0.0552098	0.440971	0.18036	0.639822	0.279296	1.31508	1.23117	1.34918	0.530087	2.59741	1.0987	0.665932	0.564516	-2.69515	2.31736	-2.29047	-0.411082	0.163059	-1.31256	0.894079	-1.90418
PML	-0.0178419	-0.0849052	-0.271361	0.0981526	-0.311547	0.107706	-0.0136801	0.176309	-0.295327	0.396016	-0.13459	-0.120122	-0.414638	-0.339747	-0.160726	-0.178792	0.0789822	0.0459742	0.194382	0.0665216	0.136804	-0.113005	0.213893	0.242959	-0.0711795	0.101389	-0.259391	-0.174517	0.406876	0.314308	0.227475	-0.0637289	0.602207	-0.109634	-0.0822969	-0.16009	0.218395	-0.326668	-0.437377	-0.109194	0.00897843	1.20393	-0.250906	-0.234469	-0.0839986	0.199229	-0.14202	-0.187821	0.450058
PNN	-0.139536	0.0284804	0.166696	-0.453571	0.136465	0.242869	-0.0248697	-0.753173	-0.0749628	-0.0129738	-0.106439	-0.0704838	-0.116633	0.116998	0.360019	0.170623	0.21817	-0.177746	-0.0556559	-0.782766	-0.0466027	-0.292797	-0.324249	0.259574	-0.0928364	-0.0378409	0.0641963	-0.0547882	-0.302343	-0.102989	-0.0988718	-0.362811	-0.0325941	-0.269996	0.110965	-0.152746	0.106795	0.362912	0.103131	-0.479845	-0.253209	0.748969	0.112716	0.433942	-0.0445439	-0.168374	0.39334	0.00696538	-0.977
PNP	-0.696353	0.784168	-0.292086	-0.500708	-0.685504	-0.150421	0.314899	-1.08579	-0.658362	0.440022	0.175705	2.27192	-0.552028	0.0128477	1.28047	0.238299	1.71235	0.234678	-0.67783	-0.726136	-0.308804	1.46649	-0.0184585	-1.00418	-0.476266	-0.179268	-0.321976	0.0298487	3.4192	-0.832504	1.2847	-0.756818	-0.0314053	0.258587	1.10394	-0.265623	-0.434324	-0.94498	-0.253931	-0.841288	-0.619551	-1.07991	-0.387041	-0.264473	-1.60299	0.13946	-0.101026	-0.00130511	-0.771205
POR	-0.138266	0.412804	-0.0850792	0.589845	0.042969	0.681857	0.286357	-0.391563	0.423229	0.353043	0.174358	0.636249	0.374713	-0.636811	0.0773265	-0.226129	0.561048	0.432324	0.252077	0.686898	-0.359381	0.358	0.356522	-0.599782	0.366905	0.814582	0.0383548	0.399548	-0.41475	0.711767	0.8793	0.925985	-0.0769706	0.544976	0.0306766	0.401802	-0.508409	-0.259407	0.0855545	0.281812	0.159951	-1.62155	-0.359676	-0.485578	-1.43469	0.717371	-0.322794	0.421793	0.0424131
PPL	0.330346	1.07468	0.782297	0.684963	1.01352	1.14026	0.445956	-1.02895	0.971541	0.319862	0.473426	1.02865	1.03426	0.558596	0.32385	0.642544	0.755942	0.639617	0.71531	1.13361	0.188868	0.784677	0.439142	-0.25951	0.73563	0.323218	0.902926	0.562066	0.166446	0.922265	0.189498	1.02908	0.748469	0.594747	0.858795	0.838366	-3.3007	0.56361	0.717085	0.728564	0.879518	-1.86002	0.610803	2.18535	-0.984011	0.716493	0.100918	0.866024	0.576744
PPY	-0.301913	-0.3468	-0.148082	-0.322342	-0.48182	0.206273	-0.311347	0.0311112	-0.215248	0.14534	-0.138454	0.0420768	-0.10124	-0.174513	-0.215419	-0.163804	-0.15626	-0.182545	-0.122985	0.161237	-0.0690862	-0.125856	0.0421302	0.100388	-0.154608	-0.182839	-0.184015	-0.195689	-0.117872	0.0380557	0.0543541	-0.30463	-0.239817	-0.438947	-0.195538	-0.204125	0.234181	-0.216602	-0.5477	-0.0309036	0.0357919	-0.0367745	-0.148026	-0.376759	-0.361494	0.114267	0.0398902	-0.160436	0.04748
PRL	-0.42203	-0.15313	-0.344985	-0.0310802	-0.524927	-0.415228	-0.0297356	-0.194552	-0.191445	-0.037464	-0.221484	-0.295693	-0.207392	0.227647	-0.0349003	-0.0938334	0.0300413	-0.44635	-0.156491	0.275261	-0.222393	-0.329222	-0.0719373	-0.366053	0.069624	-0.244832	-0.0938334	-0.434392	0.0999628	-0.305538	-0.534705	-0.102748	-0.0541653	-0.131328	-0.408961	-0.263314	0.292475	-0.00344234	-0.278626	0.0368301	-0.0533649	0.207433	-0.0907461	-0.0858973	0.374836	-0.487286	0.0912875	-0.0768413	0.376453
PRX	0.340239	0.470077	0.167868	0.338883	0.122009	-0.180815	0.343538	-0.0593931	-0.10516	-0.324316	-0.347898	0.277733	0.172071	-0.244776	0.356818	-0.0139353	0.0812813	0.472001	0.100801	1.15493	0.421251	0.725234	0.711383	-0.423082	0.368108	-0.158045	0.143815	0.324416	1.1545	0.50862	0.461409	0.372139	-0.554395	0.419899	0.0875047	0.13597	-0.239176	0.849531	0.119712	0.996994	0.427443	0.115665	0.178389	-0.480649	0.00502657	0.327453	0.114877	0.536459	-0.137909
PSD	-0.534132	0.0971135	-0.253641	-0.185667	0.11565	-0.121309	0.0312085	0.784667	-0.100002	0.091116	-0.00278059	0.052839	0.0473904	0.0498342	-0.113114	-0.294027	0.0518626	0.598789	-0.661173	-0.181995	-0.43899	-0.0110749	-0.260925	0.272022	0.0184987	-0.646534	-0.215755	-0.0335313	0.204574	-0.649177	-0.130234	-0.0131393	-0.0328925	0.27004	-0.0154325	0.213139	0.282756	-0.148363	-0.527738	0.257636	-0.514186	0.446502	-0.0675108	-0.56356	0.258217	-0.443188	0.830161	-0.0948291	1.20415
PTH	-0.0954432	0.11694	0.0634118	-0.159063	-0.0684575	-0.00185248	0.0402072	0.156378	0.0253718	0.00910956	-0.0107219	-0.0107219	-0.154733	-0.052434	0.00717992	-0.0470817	-0.0938776	0.215592	-0.111921	-0.029993	-0.0904087	0.0972499	0.345134	-0.0310129	0.0251827	-0.0962043	-0.022847	0.0920613	0.111122	-0.0198055	-0.0706883	-0.148344	0.114943	-0.0496223	0.0459941	0.144013	0.0800634	-0.0107219	-0.0685102	0.0246086	0.226307	0.149463	-0.0356088	-0.0920034	-0.0640632	-0.045425	-0.0851678	0.130552	0.0328947
PTN	0.613585	0.778639	0.161515	0.0212082	0.523718	0.0746632	0.0683215	-1.45891	-0.133689	-1.81227	1.72304	0.289263	0.653383	-0.240222	-0.207351	0.29106	-0.0688827	0.748416	0.0613295	1.32903	0.357275	0.266651	0.474165	0.487459	0.824002	1.87508	-0.033934	0.071368	0.982692	-0.719345	0.278806	0.278806	1.14279	0.540158	-0.125317	0.387871	0.40117	0.0376361	0.303383	0.213272	0.282291	-0.88234	0.957642	3.38491	0.759177	0.635112	-1.25161	-0.0303842	-0.0681671
PTS	-0.629618	-0.310311	-0.435589	-0.824146	-0.679169	-0.0300219	-0.712899	-0.833742	-0.408916	0.750865	-0.473445	-0.0494891	-0.822571	-0.167243	-0.341483	-0.401384	-0.281768	-0.643477	-0.553219	-0.910047	-0.757212	-0.268925	-0.555633	0.284356	-0.696136	-0.511604	-0.448717	-0.614258	-0.672783	-0.727145	-0.906204	-0.775033	-0.0933569	-0.686437	-0.366951	-0.419376	1.16368	-0.477007	-0.658724	-1.21116	-0.871152	0.45737	-0.546041	0.643981	1.07343	-0.546011	1.49798	-0.595467	0.435783
PVR	0.0571004	-0.0198495	-0.255978	-0.118414	-0.322545	-0.0196453	0.424036	-0.215118	-0.221112	0.640137	-0.0581641	0.179911	-0.175741	-0.226446	-0.173559	-0.0758459	0.210993	0.0713241	-0.188747	-0.300241	-0.0130387	0.352413	-0.0444393	-0.0366649	-0.243121	0.324399	-0.371724	-0.0290068	0.681781	-0.000574	-0.134852	-0.0483585	-0.0399916	0.202964	-0.12967	-0.284886	-0.0356745	-0.119238	-0.407262	0.0422136	-0.170021	-0.188461	-0.0928623	-0.222531	-0.383924	0.102806	0.111526	-0.122408	-0.30571
PXK	-0.483955	0.649406	0.203541	0.0971338	0.309561	-0.513983	0.332011	0.807257	0.31482	0.21016	0.541402	0.252182	0.220982	-0.45742	-0.150257	0.00446923	0.126566	0.217464	0.391782	-0.31808	0.299511	0.661115	0.411498	-0.340922	0.0581495	0.140179	-0.0222548	0.378728	0.39301	-0.176488	-0.0491096	0.226692	0.112338	-0.0378444	0.0677815	-0.341834	-0.0982324	0.12092	0.0730684	-0.562784	-0.273465	-0.278741	0.0232965	-0.0915851	0.250937	0.151142	-0.240185	0.337893	-0.669259
PXN	0.140171	0.155953	-0.22704	0.0453572	-0.147793	-0.290353	0.323505	0.00168272	0.288367	-0.071425	0.155255	0.139723	-0.0488821	-0.324631	0.169292	-0.119191	0.38847	0.172586	0.243143	0.293504	-0.163754	0.351449	0.269889	-0.342635	-0.164035	0.0825813	0.0190088	0.181067	0.561936	0.0655949	-0.0256284	0.0524826	0.102817	0.192244	0.0703999	0.0330603	-0.455487	-0.17953	-0.0387445	0.391375	-0.0646568	-0.501798	-0.284897	-0.768129	-0.811513	0.0253442	-0.387958	0.00650538	-0.0539472
PYY	-0.172802	-0.22283	-0.16057	-0.0375985	-0.334222	0.229842	0.00725438	0.236399	-0.187715	-0.108594	-0.264861	-0.315559	-0.0126212	-0.209501	-0.198776	-0.0482539	-0.180057	-0.124933	-0.116146	-0.014347	-0.0667685	-0.106112	-0.0467663	0.0757789	-0.16878	0.0474412	-0.331581	-0.173746	0.153485	-0.19575	-0.0168446	-0.138444	-0.143203	0.165324	0.047097	-0.183869	-0.035518	-0.219517	-0.37161	0.203725	-0.0331547	0.24552	-0.289161	-0.206476	0.168244	0.0277122	0.586081	-0.314256	0.538222
PZP	1.84694	-0.312762	1.09194	1.01873	1.11011	-0.69594	0.176986	0.365246	2.20034	-0.63305	0.0668867	0.539225	0.459035	-0.660142	0.187659	1.80692	0.55874	0.231402	0.139636	0.484976	1.55019	-0.170072	-0.261189	-0.67411	0.926566	-0.167885	-0.176203	1.0488	0.0721134	0.767182	0.406738	-0.0292466	0.188811	0.558192	0.481849	1.28383	-1.10826	0.704312	0.587659	0.774734	0.915416	-0.555518	0.291476	-0.490489	-0.331034	0.122972	-0.40517	0.937621	-0.756109
QKI	0.576644	0.448737	0.705408	0.49515	0.631536	-0.569125	0.488118	-0.17049	0.217962	0.185338	0.524883	0.213784	0.375052	-0.290165	0.373919	0.237383	0.715302	0.548598	0.30792	0.548836	0.406217	0.702078	0.486498	-0.32403	0.490566	0.701081	0.237686	0.510409	0.696441	0.667803	0.455103	0.496121	-0.0475133	0.761631	0.240546	0.238479	-0.0297649	0.14945	0.463047	0.43592	0.317602	-0.636385	0.770546	-0.189709	-0.298978	0.464075	-0.790188	0.614352	-0.539485
RAN	-0.36985	0.146962	-0.0730382	-0.364105	-0.255133	0.400135	-0.0779342	-0.267741	-0.338847	-0.46215	-0.376344	0.193138	-0.157363	0.996901	-0.00527434	-0.0226094	0.476132	-0.0698515	-0.114323	-0.415169	-0.172085	-0.0599724	-0.361712	0.284559	-0.31869	-0.225699	-0.170892	-0.235942	-0.350949	-0.224728	-0.177815	-0.714063	0.194708	-0.196641	-0.0659867	-0.359855	0.390006	-0.144827	0.00974604	-0.194791	-0.403187	-0.27789	-0.261653	0.217334	-0.173474	-0.37155	0.459959	-0.034818	-0.0997236
RB1	0.307446	0.110063	0.126696	-0.22215	0.13019	-0.211726	0.250668	0.126182	-0.052907	-0.315556	0.0256004	0.00195935	-0.116023	-0.132438	0.0776834	0.0453119	-0.119177	-0.195921	0.0251372	-0.0035031	0.293873	0.10282	-0.104211	-0.144298	-0.216117	0.0712705	-0.0258242	0.124192	0.457612	-0.261642	-0.214983	-0.00220036	0.328702	0.144251	-0.235629	-0.0163754	0.0165576	0.14043	0.197257	-0.032253	-0.0322017	0.15816	0.533828	0.559235	0.212331	-0.126151	-0.450678	0.139069	-0.958105
RAX	0.117437	-0.141672	-0.430822	0.242704	-0.247236	0.286059	0.00819456	0.251069	-0.218594	-0.246745	-0.460324	-0.322123	-0.140836	0.0260682	-0.0602693	-0.186192	-0.272557	-0.00879023	-0.203715	-0.20277	-0.0134363	-0.209072	-0.115068	0.329633	-0.113872	0.226663	-0.123327	-0.602384	0.0137291	-0.136306	-0.110709	-0.132059	0.222074	-0.366072	0.224953	-0.486584	0.0834844	-0.126627	-0.451042	0.36023	-0.0444513	0.232262	-0.404587	-0.207208	-0.258626	0.155994	0.786012	-0.631148	0.345475
RD3	-0.0334295	-0.303576	0.00811009	0.19812	-0.271871	0.16361	0.0271265	-0.0384925	-0.124536	0.0858368	0.110138	-0.0985675	-0.2191	-0.0939225	0.30649	0.11411	-0.165998	-0.0248236	0.163442	0.044148	0.0483239	-0.122968	0.195461	-0.0126126	0.0342656	0.0657442	-0.0618144	0.172963	-0.199474	0.0606694	0.194084	-0.0819132	-0.278127	-0.0209328	0.329396	-0.297435	0.338247	0.106018	0.016227	0.43079	-0.0382448	-0.0670413	-0.0505103	-0.0361285	-0.210971	0.340313	0.208383	-0.102892	0.147122
RDX	0.512453	0.689285	0.144417	-0.249672	0.693489	-0.838857	0.781781	-0.426462	0.434726	-0.242297	0.686065	0.441853	0.554302	-1.01659	-0.30788	-0.240725	0.00904662	0.0190509	0.904897	-0.324965	0.0326754	0.334299	0.258019	-0.681179	-0.0341139	0.400803	0.0578182	0.785703	0.888332	-0.0318733	-0.204359	0.00886841	-0.215632	0.887407	-0.137372	-0.0174983	0.376502	-0.268361	0.0667436	0.429752	-0.124012	-1.18503	0.729784	-0.752659	-0.411643	-0.124187	-0.209875	0.499346	-1.16744
REL	0.0560183	0.358832	0.12351	-0.239418	-0.117016	0.475156	0.0833116	-0.475604	-0.297305	1.0077	0.539846	1.79773	-0.0501544	-0.541474	0.723476	0.829722	0.749198	0.963101	-0.0466214	-0.336464	0.329493	1.70079	1.16563	-0.528212	0.338015	0.437416	-0.196353	0.485294	1.17189	-0.346851	1.71332	0.307094	0.411	0.387597	1.38389	0.9475	0.477311	-0.209658	-0.12133	0.0569424	0.163102	-0.0315119	1.08062	0.916623	-0.141861	0.954173	-0.6985	0.173718	-0.547623
REN	0.356768	-0.305663	0.101364	0.204709	-0.201917	-0.0439399	-0.0143835	0.509087	-0.125682	0.389485	-0.152427	0.801917	-0.371947	-0.278367	-0.247266	-0.127762	-0.051758	0.0486386	-0.0248649	0.455591	0.216341	-0.248502	0.0753011	-0.254804	-0.126579	-0.221747	-0.339119	-0.33262	0.120926	-0.0774554	0.759698	0.0613398	-0.190614	-0.142484	0.553986	0.0486386	-0.409183	-0.0830792	-0.365444	0.0631135	0.0155939	0.143557	0.10525	-0.126209	-0.215535	0.0376792	-0.109404	-0.131232	-0.122105
RET	-0.0912697	-0.345351	-0.400518	0.164513	-0.346555	-0.358807	-0.347135	0.250965	-0.36438	-0.190889	-0.435569	-0.44069	-0.549421	-0.34242	-0.151186	-0.369278	-0.384691	-0.258176	-0.0459151	-0.280631	-0.304998	-0.398691	-0.32369	-0.0947453	-0.334773	-0.236992	-0.389688	-0.523191	-0.155256	-0.21024	-0.127988	-0.274679	-0.309097	-0.202574	-0.0573542	-0.2444	-0.160655	-0.184658	-0.763375	0.0363052	-0.32513	-0.0416577	-0.363586	-0.507313	0.0978395	-0.231903	-0.27693	-0.489475	-0.118864
RFK	-0.384264	0.082181	-0.0582801	0.039445	-0.0754415	-0.368573	-0.120862	-0.367547	0.00711798	-0.152775	-0.164465	-0.147877	-0.101824	-0.149928	0.0675523	-0.116359	-0.0117911	0.0923093	-0.215035	-0.198664	-0.662368	-0.2188	-0.208941	-0.0923296	-0.0681207	-0.212508	0.13235	-0.0799429	-0.944434	-0.329804	-0.27344	-0.408341	-0.367449	-0.0714936	-0.273772	-0.179638	-0.770876	0.0882814	0.131555	-0.788601	-0.219328	-1.77685	-0.123294	-0.309975	-0.107432	-0.233631	-0.481362	-0.217982	-0.557337
RGN	0.90862	1.41044	0.947383	0.71915	1.27217	-1.48274	1.20688	0.399513	0.830323	-0.542889	0.562106	0.818613	0.608225	-1.42235	0.9416	1.84829	0.153292	0.679545	0.018788	0.98318	0.584143	0.957327	1.46737	-0.553505	1.09181	0.8153	1.56041	1.38122	1.27173	0.663102	0.925542	0.988505	-0.803809	0.71288	0.822477	0.170417	-1.22827	1.24172	1.50162	1.42284	0.932634	-1.37807	1.21878	-2.2775	-0.0254082	1.30524	-1.77099	0.923136	-0.854292
RGR	-0.138795	0.289579	-0.221301	0.300444	-0.282543	-0.0627401	0.199634	0.335082	-0.120525	-0.0874016	-0.0273279	-0.273832	0.197339	0.0288819	0.0351437	-0.241274	-0.219537	-0.0731481	-0.106447	0.0248095	0.14939	-0.101123	-0.271062	-0.00277647	-0.153054	0.0413696	-0.430299	0.00838934	0.15467	-0.186464	-0.147807	-0.224271	-0.148013	-0.0988843	-0.143481	-0.100896	0.274376	0.00708008	-0.271023	0.449737	-0.0268787	0.226884	0.0260291	-0.171774	0.09289	-0.116778	0.133782	-0.146744	0.305072
RHD	-0.0175848	-0.231139	-0.0873356	0.17147	-0.203436	-0.065134	-0.0033013	0.265125	0.139919	-0.0179093	-0.11645	-0.140963	0.0123435	-0.186082	-0.132049	-0.142704	-0.280107	-0.140446	-0.0971694	-0.0127728	0.345217	-0.179741	-0.443113	-0.363633	-0.00608466	-0.252474	-0.0661212	-0.221394	0.230275	-0.185144	-0.0701699	-0.0769135	-0.161564	0.102543	-0.0889349	0.311094	0.108883	0.0523912	-0.309848	0.208124	-0.0554986	0.465084	-0.0242704	-0.274445	-0.105474	-0.286646	-0.0129213	0.0461366	0.149554
RHO	0.0252692	-0.269513	-0.177815	0.103662	-0.220529	-0.172439	0.2064	0.695244	-0.304621	-0.117329	0.0118806	-0.0254679	-0.153418	-0.10913	0.103191	0.0352041	-0.031186	-0.140488	-0.231149	-0.0631378	-0.0967686	-0.00418727	-0.0763408	0.106012	-0.258346	-0.0563374	-0.411893	-0.371828	0.332715	-0.162885	0.0126154	-0.0284087	-0.0193455	-0.0479525	-0.0261579	0.0589489	0.071405	-0.119274	-0.369073	0.203681	-0.141068	0.34516	-0.20705	-0.146238	-0.0151209	-0.19159	0.467299	-0.146669	0.135281
RLF	-0.277242	0.253115	0.057584	-0.555258	0.448806	-0.630128	0.526555	-0.383571	0.217225	-0.0269617	-0.0402075	1.1001	0.156219	0.334324	-0.125504	0.108699	0.578697	0.678819	-0.0981299	-0.467229	-0.50614	0.481154	0.541762	0.0377221	-0.127634	-0.325477	0.423898	0.5862	0.63251	-0.891496	-0.0764863	-0.50568	0.158968	0.252155	0.212449	0.320219	0.454022	-0.206881	0.288006	-0.866623	-0.399882	-0.111686	0.224375	0.449097	-0.38511	0.209632	0.12375	-0.340513	-0.259028
RP1	0.125883	0.111762	-0.17408	0.077037	0.477405	-0.102065	0.0102426	-0.00993351	1.10331	-0.289269	-0.0350022	0.0251839	0.112598	-0.261903	0.00638088	-0.0251167	0.236854	-0.0726127	-0.121333	0.0288893	0.0522966	-0.0384763	-0.00210464	-0.00858233	0.227714	-0.0847181	0.0964908	0.436541	-0.156178	0.129248	-0.147937	-0.0471767	-0.260013	0.139658	0.156537	0.740539	0.099486	-0.138123	-0.0384763	0.0376426	-0.0828731	-0.210664	-0.215405	-0.159596	0.264512	-0.427498	-0.0772542	0.242574	0.245454
RP2	0.306001	-0.12104	0.39993	-0.0502936	0.315995	-0.503368	0.260418	0.0924732	-0.182229	0.339051	0.116351	0.171114	-0.0932017	-0.219284	0.161264	0.213109	-0.0570895	0.0122073	-0.0316437	0.11314	0.434491	0.343077	0.244538	-0.17524	-0.0799506	0.310236	-0.00380572	0.359773	0.66159	-0.00862766	0.471666	-0.0141907	0.150021	0.11402	0.234089	0.0416125	-0.138651	0.237005	0.387856	-0.157252	0.432767	-0.613683	0.502048	-0.195416	-0.0305634	0.253449	-0.975029	0.361883	-0.477033
RP9	0.286509	-0.476761	0.160888	-0.396561	-0.160264	0.023065	-0.736274	-0.402312	-0.206988	0.0769185	-0.542929	-0.48385	0.10528	0.433419	-0.0191536	-0.218622	0.0154444	-0.56419	-0.444945	-0.0546154	0.433479	-0.381959	-0.484704	-0.293137	-0.340149	-0.135469	-0.128495	-0.399577	-0.534472	0.151443	-0.377114	-0.1429	-0.406507	0.0645644	0.0921848	-0.453631	0.534725	0.0977289	-0.143465	-0.222398	0.0864771	0.550528	-0.0301972	0.608706	0.465758	-0.0705993	0.601138	0.178707	-0.53654
RPE	-0.727173	-0.514488	0.00162003	-0.702054	0.191229	0.305449	-0.0766085	-0.116796	-0.0871807	0.21474	0.0350423	-0.193001	-0.441152	0.848953	-0.234157	-0.19307	-0.409349	-0.29523	-0.0723911	-0.618288	-1.08072	-0.433783	-0.520032	0.411234	-0.432945	-0.551223	0.283072	-0.0471803	-0.983602	-0.630525	-0.58526	-0.3759	0.682959	-0.232596	-0.467485	-0.761962	0.394658	-0.122048	-0.0134055	-1.30513	-0.81754	0.203505	0.0385341	-0.0217032	-0.3136	-0.347692	0.285407	-0.268848	-0.738104
RRH	-0.0540053	-0.264775	0.253093	0.210628	-0.1286	0.113424	-0.164895	0.0925568	-0.0139562	-0.110181	0.220871	-0.10714	0.0997775	-0.0911912	-0.0775354	0.366166	0.246599	-0.00620731	0.0463964	0.0778156	-0.064956	-0.193439	-0.121766	0.0709979	-0.148292	-0.229701	-0.15505	-0.226426	0.0551247	-0.185423	0.0736312	-0.0165517	-0.130278	0.313025	-0.106721	-0.238667	-0.0458563	-0.0663472	-0.0674941	0.13534	-0.0870487	0.496792	0.26422	-0.145232	0.035155	-0.00157111	0.0520808	0.0259213	-0.0882048
RS1	-0.286565	0.374658	0.181469	0.294841	0.559302	-0.182178	0.176821	0.154366	0.0906129	-0.272162	0.253466	-0.0595753	0.272298	-0.406948	-0.0458725	0.157221	-0.037352	-0.0745157	0.152978	0.567747	0.233178	0.256182	-0.0291007	-0.133564	0.254118	0.0786138	-0.144302	-0.00217031	0.194964	0.477448	0.452849	0.378879	-0.235136	0.49606	0.0383315	0.103887	-0.0616657	0.0148756	0.046546	0.0966846	0.145816	0.00567282	0.101909	-0.264353	0.149096	0.134097	0.366734	0.420101	-0.0462282
RYK	-0.441457	0.397963	-0.213256	0.0293618	0.347254	-0.211094	0.43896	-0.388409	0.404428	0.0440216	0.212426	0.0490775	0.133125	0.919047	-0.568252	-0.526748	-0.136902	-0.0703032	0.454323	-0.393172	-0.898316	-0.0261858	-0.0157861	0.565066	-0.15633	0.259097	0.339911	0.679564	-0.500934	-0.298104	-0.427787	0.0379455	1.03099	-0.0718699	-0.551685	-0.202142	1.21289	-0.284001	-0.0524933	-0.46571	-0.651996	-1.26877	-0.45818	0.425373	-0.165883	-0.140972	-0.651538	-0.237179	-0.308324
SAG	0.174835	-0.248998	-0.256816	0.267554	-0.411583	0.713969	-0.0521066	0.491238	-0.235007	0.152093	0.0897698	-0.263671	-0.0228385	-0.292472	-0.382708	0.255645	-0.221822	0.146934	0.0780266	-0.109755	0.0520209	-0.138803	-0.0251874	-0.113164	-0.373793	0.278615	-0.179688	-0.368158	-0.195665	0.130782	-0.0572722	-0.222577	-0.217194	-0.35864	0.377157	-0.101008	0.360755	-0.0349116	-0.13249	0.153997	0.00104918	0.300314	0.0222764	0.0883659	0.0664946	0.0026627	0.276716	0.0983553	0.26432
SCD	0.00481734	-0.180009	-0.342417	-0.0856298	-0.044531	-0.197605	-0.0535746	-0.28829	0.135898	-0.553987	0.160181	-0.119902	-0.0745678	0.256411	-0.195304	-0.906036	0.489575	-0.436917	0.654973	-0.201015	-0.301947	0.551001	-0.468816	0.202907	-0.164127	-0.224133	0.0451855	-0.113164	-0.874048	0.3632	0.100468	0.367135	0.988091	0.0151105	-0.412721	-0.743497	0.590706	-0.507994	-0.255797	-0.46254	-0.153334	0.19657	-0.414471	0.0989363	-0.616297	-0.345379	0.282035	-0.18127	0.778823
SCT	-0.92163	-0.386431	-0.166661	0.0116495	-0.926339	0.673282	0.4331	0.51893	-0.797584	0.577615	-1.1231	0.0301784	-0.338938	-0.290064	-0.0581365	-0.0551303	0.0394637	0.158417	-0.19571	0.355453	-0.928483	0.116405	-0.433775	0.0462221	-0.575981	-0.306321	-0.252677	-0.0154848	0.251775	-0.0949885	-0.385995	0.0877475	0.46092	0.280855	-0.329608	-0.172025	0.790069	-0.247798	-0.293885	0.00214795	-0.445917	0.846165	0.00674271	-0.39676	0.29387	-0.297048	0.745397	-0.411616	0.384351
SDS	0.36486	-0.291661	0.528203	-0.291185	-1.023	0.643704	-0.246821	0.196495	-0.925651	0.274091	0.129644	0.543293	-0.778605	0.212061	0.0382878	-0.508863	0.36545	-0.222522	-0.169614	-0.195459	-0.0498732	-0.15998	-0.573912	0.210991	-0.588877	-0.292155	-1.09338	-0.51454	-0.176545	-0.408024	-0.257794	-0.887751	0.552251	-0.369493	-0.137819	-0.267789	0.404858	-0.719004	-0.137996	0.0195903	-0.710532	-0.0406995	-0.732012	-0.501616	-0.299586	0.431149	0.0333032	-0.775138	-0.0492952
SF1	-0.138897	0.25036	-0.0350301	0.15459	-0.0549408	-0.213007	-0.0291101	-0.156215	0.0286188	-0.155596	0.463985	-0.0359217	-0.00654289	-0.0846878	-0.156138	-0.177708	-0.248101	-0.128436	-0.00753188	0.227032	0.0984502	0.311753	0.0647531	-0.0692283	0.158125	0.0114129	-0.324767	-0.284323	0.0479293	-0.0893999	0.28211	-0.0136703	0.135142	-0.088181	0.0985689	0.0417925	-0.550521	-0.120989	0.0359384	0.269103	-0.272695	0.132976	0.0637431	-0.240788	-0.113795	0.120511	0.282296	-0.223105	0.640825
SET	-0.328476	-0.702585	0.0013962	0.00686804	-0.310106	0.831976	0.0938479	-0.0768514	-0.0150849	0.298248	0.0690071	-0.633454	0.118948	0.519439	0.0444804	-0.0392847	0.150243	0.0591573	0.216137	-0.944889	-0.639009	-0.445318	0.0657177	0.186964	-0.814558	0.11226	0.0701729	-0.406823	-0.516063	0.226198	-0.260161	0.458411	-0.155287	0.163896	0.163654	0.365293	0.172585	-0.351001	-0.344431	0.12906	-0.61514	0.219235	0.0561517	0.551922	0.672139	-0.266249	-0.203156	-0.258443	-0.130775
SFN	0.102146	-0.167158	0.17231	-0.238741	-1.19031	2.38241	-0.398338	-1.30271	-1.19204	1.98033	-0.588434	1.47139	0.204792	1.44354	-0.00642143	0.324839	1.10632	-0.0102394	-0.585328	0.16273	-0.349314	-0.171826	0.268927	1.09818	-0.511465	-0.83367	0.271109	-0.277377	0.0476265	-0.163651	0.940089	-0.329764	2.56267	0.320512	0.917231	-0.321348	0.992062	-1.06468	-1.25748	-0.508145	0.00868902	2.49671	-0.421608	2.34062	-0.241784	0.215741	0.476111	-1.0997	2.35592
SHB	0.051102	0.548865	-0.0802537	0.374551	-0.1944	0.163752	0.0667896	-0.427153	-0.204841	-0.0946022	-0.29024	1.06261	0.367907	0.154748	0.167168	0.106066	1.06366	0.407397	-0.234698	0.583226	0.426667	-0.0031349	0.0339528	-0.851568	0.0959044	0.152937	-0.176083	-0.313007	1.27501	0.232759	0.383229	-0.19979	0.121765	0.175627	0.49604	0.0475781	-0.836071	0.00139604	-0.108615	0.306934	0.235538	-0.690983	0.152866	-0.131149	-0.454612	-0.0877428	-0.698508	0.0556898	-0.0722102
SHD	-0.252376	-0.211851	-0.151401	-0.385363	-0.489788	0.247251	0.0203538	0.375494	-0.246146	0.0754648	-0.0518468	-0.327569	-0.218381	-0.363407	-0.133223	0.0352771	0.0205049	-0.10973	0.0437019	-0.0137001	0.021409	-0.104051	0.0493951	-0.0576948	-0.142703	-0.225967	-0.173027	-0.0417382	-0.0231795	-0.263893	-0.0315931	-0.059082	-0.170954	0.19568	-0.425347	0.0530232	-0.0470541	0.0315716	-0.241664	0.201184	-0.0624623	-0.0338311	-0.176831	-0.176699	-0.0766946	0.076323	0.432241	-0.135014	0.461075
SHF	-0.323274	-0.048734	-0.204745	-0.0388497	-0.811023	0.379504	-0.0961836	0.0971766	-0.180808	0.487991	-0.275325	-0.170443	-0.434153	0.126249	-0.246945	-0.0620507	0.0632573	-0.452608	-0.374936	0.392884	-0.393149	-0.212839	-0.101855	0.258877	-0.303467	-0.135823	-0.305492	-0.322411	-0.283771	-0.156869	-0.23831	-0.25862	-0.141381	-0.144822	0.0294544	-0.343371	-0.143864	-0.263698	-0.198581	-0.0112641	-0.325398	-0.113244	-0.172983	-0.136771	-0.241111	-0.0946323	-0.0135841	-0.395206	0.435177
SHE	1.39463	1.65568	1.41347	1.02529	1.22932	-1.03177	0.864492	0.644337	0.629622	-0.767368	1.02775	0.956001	0.61841	-1.19772	1.17933	1.02173	0.388657	1.14592	0.384231	1.78454	1.57857	0.796611	1.10464	-0.727539	1.02298	0.923074	1.46118	0.519671	0.71053	1.26384	0.792099	0.862235	-1.06864	1.0972	1.39477	0.714873	-1.17333	1.13053	1.18182	1.19513	1.60926	-1.78784	1.03697	-1.80601	-0.432619	0.969705	-1.44445	1.4815	-1.25301
SHH	0.188566	-0.188405	0.0739214	0.276414	-0.359836	0.157964	0.121343	-0.0300133	-0.273088	-0.220518	-0.133175	-0.0767787	0.163776	0.319722	0.0901574	0.0561931	0.127748	0.243042	-0.00488245	-0.0676302	0.0470234	0.00431526	0.35552	-0.103959	0.14861	0.0526578	-0.0573923	-0.349667	0.158134	0.0996481	0.341809	0.0643028	-0.376814	0.211464	0.0960808	0.191638	-0.0546165	-0.138726	-0.178524	0.218516	0.254537	0.26142	-0.0739494	-0.414337	-0.278615	0.277786	2.092	-0.0968092	0.353832
SKI	0.567477	1.01968	0.091021	0.282903	0.0111048	-0.767894	0.00111882	-0.436184	-0.349397	0.536272	-0.299256	-0.00354826	0.32001	-0.939556	0.266069	0.282392	0.400324	0.28504	-0.131889	1.08962	0.844049	1.17247	0.517465	-1.0225	0.628025	1.03973	-0.361529	0.265874	1.12847	0.568486	0.257795	0.752037	-0.638686	-0.01765	0.289694	-0.103471	-0.607244	0.408836	0.595825	0.682472	0.380588	-1.21999	0.260442	-0.702054	-0.328894	0.595841	-0.629263	0.635564	-0.827998
SLA	-0.24446	0.208182	0.437121	0.389369	0.532902	-0.536692	0.568022	0.496076	-0.266358	-1.40115	-0.0853303	0.75582	-0.0502259	-1.33306	0.878025	-0.241353	0.754971	0.22047	1.45069	-0.0521338	0.457646	1.01719	1.07908	1.88529	0.986393	0.269648	0.470695	1.05024	1.06318	-0.131283	0.52282	0.779046	0.472464	0.215507	0.460665	0.426564	-0.227422	-0.401546	0.643278	-0.332786	-0.282548	-1.20468	-0.223887	-2.55694	0.494188	0.225285	-0.821158	-0.0296781	1.0766
SLK	0.957767	0.680679	0.889343	0.514312	0.653832	-0.690302	0.497213	-0.690547	0.536636	0.0413684	0.450453	0.755226	0.737531	-0.123145	0.696026	0.470823	0.777299	0.572818	0.333309	0.673809	0.98247	0.707185	0.541267	-1.14045	0.358832	0.687573	0.597397	0.635071	1.07759	0.398814	0.547797	0.214811	0.0137442	0.674819	0.563766	0.443989	-1.36991	0.644284	0.697949	0.870731	1.01897	-0.649268	1.02863	0.0819833	-1.0286	0.706766	-2.24486	0.917938	-1.68818
SLN	-0.495087	1.74405	-0.764298	0.183507	0.588514	-0.461245	-0.192811	0.056233	-0.0639626	0.183847	-0.728868	-0.229141	0.10855	0.220897	0.460268	-0.437799	2.02596	-0.107973	-0.354616	0.917469	0.00198998	0.923947	-0.565406	-0.901943	-0.720822	0.0259984	3.47035	1.23071	-0.631738	-0.672435	-0.728016	-0.337227	-0.556174	0.443264	-0.501434	-0.587994	-0.251463	2.03007	2.53572	-0.443409	-0.11036	-0.657533	-0.0166087	-0.510235	-0.347429	0.690146	0.387725	0.0470283	-0.204132
SMO	-0.661535	-0.439438	-0.192502	-0.22294	-0.212249	-0.00908134	-0.0387107	0.403745	-0.52034	0.682969	-0.0245884	-0.234044	-0.375474	0.504666	-0.32965	-0.194951	-0.379981	-0.103815	-0.442851	-0.237111	-0.52771	-0.38412	-0.263726	0.101763	-0.292225	-0.0402963	-0.131981	-0.232875	0.30197	-0.572401	-0.830912	-0.173852	0.160117	0.0577603	-0.108412	-0.0837753	0.779089	-0.148792	-0.434418	-0.0426615	-0.261382	0.212462	-0.402484	0.510126	0.21499	-0.590157	1.04923	-0.158758	0.782585
SMS	-0.694664	-0.469727	-0.364915	0.188064	0.0520676	0.161607	0.0542716	-0.499852	0.0450029	-0.311035	0.418048	0.18466	-0.290946	1.17638	-0.686397	-0.976043	-0.12403	-0.165272	-0.0319195	-0.283963	-0.869268	-0.206815	-0.573036	0.604481	-0.0641456	-0.282539	0.135785	0.0696392	-1.40053	-0.594076	-0.326678	-0.348406	0.196268	-0.282049	-0.37125	-0.0199498	1.99364	-0.89021	0.273463	-1.20396	-0.600804	-0.645019	-0.837123	0.754963	1.23981	-0.568774	1.44933	-1.14712	1.03733
SNN	-0.0186967	0.284597	0.406343	-0.0672669	-0.260107	-0.27295	0.369209	0.046476	-0.430521	-0.479113	0.0769496	0.733877	-0.0574999	-0.106239	0.406337	0.21316	0.460254	0.11319	0.193824	0.132078	-0.070569	0.28969	0.0562705	-0.136218	-0.0913045	0.274677	0.0661151	-0.131414	0.561682	-0.137721	0.218254	-0.177339	0.205074	0.193139	0.529848	0.218532	-0.998948	-0.0238236	-0.0645362	-0.127661	-0.109762	-0.603256	-0.16105	-0.297231	-0.294278	0.0912897	-0.0260099	-0.133089	-0.0489108
SON	0.273999	0.342524	0.560418	-0.160662	0.337864	0.220423	0.0304913	-0.439322	-0.142379	-0.114064	-0.0246222	0.0673082	0.170519	-0.514483	0.505854	0.366327	0.339269	0.216118	0.0446794	0.200955	0.293596	0.241912	0.125907	-0.137513	0.211588	0.332763	0.158565	0.245944	0.423212	0.175044	0.165657	0.115916	-0.0451989	0.223148	0.467194	0.118412	-0.595601	0.274758	0.285103	0.390021	0.227279	0.102999	0.452275	-0.413337	-0.070343	0.272916	-0.441077	0.44886	-0.910189
SP2	0.0296025	-0.0721615	-0.125107	0.192084	-0.0272267	-0.00317073	-0.223213	-0.045208	-0.0905131	-0.0407089	0.0710464	-0.0934661	-0.156302	0.10655	-0.132887	0.184981	0.220633	-0.00242615	0.13864	0.0176314	0.233728	-0.113001	0.0330622	-0.109568	-0.0784358	0.110811	-0.081954	-0.141181	0.314092	0.113136	0.124421	0.0363631	0.1605	-0.0512039	-0.0741016	-0.0772031	0.0416848	0.0644029	0.0847346	0.0784723	0.165504	-0.1295	-0.131557	0.055113	0.0762336	0.0952696	-0.14632	0.0753355	-0.203987
SP1	0.448219	0.0126864	-0.189055	0.00272123	0.0130485	-0.0830407	-0.00167846	-0.14516	0.109227	0.0658672	0.411698	-0.0239031	0.00308405	0.00526312	-0.163429	-0.454256	0.237941	-0.157253	0.0283198	-0.133208	-0.415602	0.19342	-0.160613	-0.349527	-0.175227	0.143089	-0.206378	-0.105677	0.355149	-0.0933438	-0.190209	0.22046	0.446106	0.0877658	-0.119523	-0.0242868	-0.0679349	-0.362249	-0.297671	-0.23614	0.0619885	-0.200098	-0.0526881	0.0628302	-0.336539	-0.0970592	-0.404635	-0.237686	0.074033
SP4	0.32808	0.0488593	0.438484	0.295901	0.0414895	-0.635167	-0.186833	0.0247703	0.130974	-0.265482	-0.273421	-0.0239871	-0.0358764	0.1368	0.0823536	0.196325	-0.0987696	-0.133795	0.0580784	0.0810724	0.330271	0.132973	0.213069	0.0866735	0.0428903	0.0494266	0.0576158	-0.249435	0.498337	0.0761388	-0.0774651	-0.00912664	-0.400986	-0.0712186	0.111128	0.222067	-0.209104	0.16808	0.133011	0.133785	0.150228	-0.246233	-0.248317	-0.279088	-0.0333	0.0716707	0.0713937	0.061191	-0.543752
SP3	0.125024	-0.0920637	0.299103	0.137288	-0.534375	0.489091	-0.199609	0.158898	-0.122343	0.181316	-0.12476	-0.234322	-0.0218999	-0.176167	-0.0738634	0.0283076	-0.241544	-0.0886077	-0.10494	0.114295	-0.0825814	-0.186852	-0.158321	0.0178943	-0.2505	-0.132777	-0.298365	-0.103662	0.255523	-0.153613	0.208089	-0.20351	0.00900668	-0.181659	-0.0659951	-0.141079	-0.133395	-0.224425	-0.167035	0.00166496	0.147632	-0.0989155	-0.156814	0.376954	-0.0549883	-0.0331359	0.442676	-0.0273928	0.169703
SP6	-0.40423	-0.151871	-0.448392	-0.138128	-0.554939	0.651929	0.0947439	0.0995878	-0.363153	0.606604	-0.378948	-0.180796	-0.333668	0.210686	0.0838846	-0.164459	-0.372897	0.109105	-0.17443	0.0782375	-0.0329718	-0.15577	0.564134	-0.0533003	0.0064645	-0.136937	-0.433607	0.573411	-0.00731462	-0.0766726	0.0778779	-0.173509	0.168229	-0.171761	-0.0992127	-0.315466	0.728265	-0.460197	-0.431806	-0.16766	-0.150744	0.202306	-0.629887	-0.485329	-0.506041	-0.292342	0.559624	-0.358858	0.375212
SP5	-0.943227	0.451816	-0.195602	-0.0820752	-0.0145639	-0.413893	-0.132292	-0.077145	0.0703307	-0.211694	-0.0159564	-0.641935	-0.0771187	-0.739069	-0.0501023	-0.158376	-0.537497	-0.103625	-0.631811	-0.315317	-0.747804	-0.673308	-0.616248	-0.644659	0.496433	-0.12436	-0.107127	0.15388	-0.20858	0.0779064	-0.659312	-0.419431	-0.380246	0.439028	0.30451	-0.217146	-0.39904	-0.188691	-0.201216	-0.114726	-0.0319442	0.0085386	-0.0514866	-0.875253	-0.173213	-0.414364	-0.207559	-0.313161	0.00285367
SP8	-0.241563	-0.139344	-0.267388	-0.113081	-0.272844	-0.0476013	-0.169486	0.037429	-0.149752	-0.247971	0.147878	-0.263127	-0.23064	0.758772	-0.365382	-0.172578	-0.0627372	-0.262128	-0.0256136	-0.212725	-0.353051	-0.117525	0.105896	-0.235772	-0.120396	-0.164602	-0.349363	-0.286267	0.0248919	-0.0574365	-0.150809	-0.0528267	-0.0012555	-0.235899	-0.278741	-0.252105	-0.159971	-0.155692	-0.240922	0.179434	-0.139202	0.113266	-0.238753	-0.0759438	0.45078	-0.119176	1.52549	-0.195761	0.115995
SP7	-0.209243	-0.038548	-0.0999156	0.12446	-0.334736	0.291359	0.202707	0.346824	-0.183811	-0.103253	-0.0742554	-0.223709	-0.39819	-0.0347943	0.0704615	-0.117747	-0.0969971	-0.175035	0.361319	0.049536	-0.179463	-0.209854	-0.249864	-0.254254	0.0347834	0.0138881	-0.342797	-0.270356	0.0710645	0.194847	0.0397262	-0.334736	-0.188774	0.0174186	-0.230799	-0.0671392	0.116914	-0.134956	-0.269043	0.152899	0.157192	-0.0166924	-0.0573706	-0.00907421	0.165954	-0.155375	0.2693	-0.226077	0.335333
SPN	-0.259423	-0.0132757	-0.261143	0.0151749	-0.395123	0.0151815	0.398396	0.653212	-0.131874	0.308552	0.140509	0.201693	-0.0134256	0.0862314	0.110658	-0.00537321	0.110933	0.354116	-0.342025	-0.169048	-0.244386	-0.0134256	-0.167043	0.0570039	0.0860162	-0.486806	-0.258982	0.157249	0.0249701	-0.161049	-0.251973	-0.163728	-0.163529	0.24986	-0.193689	0.328688	0.490112	-0.197307	-0.339315	-0.0559111	-0.29853	0.360897	0.132899	-0.0460844	0.321828	-0.17197	0.791007	-0.132305	0.494009
SPR	-0.491971	-0.516451	-0.459719	0.184397	-0.480189	0.823217	-0.040176	0.0631758	0.0205944	0.151861	0.109217	-0.164163	-0.23267	0.258704	-0.206109	-0.426233	-0.292589	-0.375336	-0.07059	0.0208724	-0.386994	-0.388109	-0.0666513	0.466628	-0.0867975	-0.174771	0.0517811	-0.0826063	-1.14689	0.156875	0.110209	0.0201878	-0.474068	-0.00972585	-0.375678	-0.0935814	0.438943	-0.138901	-0.228133	-0.674902	-0.117386	0.412723	-0.582498	0.276364	-0.139306	-0.0301162	0.341735	-0.152886	0.467586
SPX	-0.393125	0.423416	0.16616	-0.0637018	0.106228	-0.243048	-0.0462304	-0.114859	-0.145377	-0.288724	-0.0611768	0.040053	-0.132266	-0.405412	-0.140339	0.129475	0.00406502	0.0996156	-0.123229	0.219255	0.0968875	-0.0390357	0.205271	-0.319378	0.191147	-0.456304	0.262838	0.179386	0.273631	-0.164741	-0.30388	-0.192867	-0.595495	-0.00163347	-0.0819764	-0.0140329	-0.227369	0.074041	-0.0187125	-0.0244288	0.51357	-0.10151	-0.22819	-0.334472	-0.315176	0.241724	-0.129001	-0.0400369	-0.077168
SRC	0.137158	-0.143688	-0.214218	0.0640162	-0.366521	0.0636882	0.179843	0.104395	-0.142444	0.00806252	-0.0969099	-0.14225	-0.0775951	-0.121002	-0.164806	-0.139437	-0.148087	-0.0754697	0.0222037	-0.0578558	-0.0157374	-0.159186	-0.00371094	0.0800963	-0.178242	0.0708873	-0.323352	-0.280755	0.159081	-0.11384	0.0316622	-0.170475	-0.0857696	-0.0405147	-0.0424856	-0.0503983	0.216319	-0.208997	-0.300956	0.40345	0.0178213	-0.0118425	-0.280826	-0.156827	0.0423805	-0.0787734	0.25942	-0.217028	0.27497
SRF	-0.153902	0.232566	0.0696133	0.0416145	-0.229191	-0.177271	0.341016	-0.21396	-0.0522344	0.138112	0.0961021	0.50432	-0.063345	0.260184	0.247886	0.163829	0.571415	0.234728	-0.430106	0.362418	-0.283408	0.292266	0.236668	-0.48787	0.137532	0.144425	-0.124265	-0.0741933	0.400523	-0.107786	0.275044	-0.110333	-0.0494853	-0.0834736	0.465503	0.0325538	0.295893	-0.00117468	-0.310575	0.154899	-0.251525	-0.0032005	0.215371	-0.0892576	-0.0786642	0.0554741	0.421396	-0.205499	0.193123
SRI	0.596832	0.284432	0.560845	0.622575	0.605491	-0.557982	0.278384	-0.121886	1.27478	-0.78934	0.0733874	0.332887	0.444392	-0.312116	0.433773	0.676859	0.29842	0.316461	0.236927	0.328924	0.441777	-0.0151777	0.222021	-0.45821	0.380078	0.180878	0.51831	0.703343	-0.503052	0.215172	0.123656	0.10769	-0.105797	0.381738	0.572223	0.867468	-0.622313	0.427172	0.488184	0.19858	0.498493	-0.810246	0.124273	-0.641951	-0.541939	0.289131	-0.616902	0.443697	-1.35066
SRL	-0.41275	0.313827	-0.154228	0.0665799	-0.116801	-0.0609195	0.224974	0.315484	0.0970069	0.142965	0.159931	0.357087	-0.00817205	-0.184939	0.29826	0.00784607	0.00471796	0.327799	-0.171119	-0.0760798	-0.0906704	-0.0619169	-0.0105125	0.214886	0.26248	-0.592732	0.101223	0.0614068	0.299929	-0.214617	0.00371412	0.266752	0.0135921	0.149048	-0.0983198	0.183102	0.0564264	0.182154	0.0826533	0.240805	0.153309	0.541349	0.0826453	-0.371872	0.277685	0.0512047	0.77427	-0.269161	0.426994
SRM	-1.10094	-0.604693	-1.02123	-0.486628	-1.32441	-0.225109	-0.356462	0.872058	-0.984265	1.09631	-0.673149	-0.263649	-0.890046	-0.234415	-0.419564	-0.848286	0.564843	-0.77505	-0.731596	-0.119905	-0.74052	-0.63438	-0.838301	0.545106	-0.494123	-0.214714	-0.468844	-1.04446	-1.53649	0.111074	-0.610825	-0.267815	0.395814	-0.367044	-0.932407	-0.633756	0.11767	-0.614037	-0.581532	-0.583757	-0.974346	-0.192411	-1.88877	-1.3024	-0.174464	-0.436404	0.806189	-1.08951	1.46288
SRR	0.155437	-0.0572806	0.437983	-0.0474998	0.0623092	-0.321356	0.0829332	-0.169806	-0.0517856	-0.278056	0.0644108	0.527554	0.278625	0.35946	0.164619	-0.184925	0.177574	-0.104321	0.709651	0.18536	0.242626	-0.631989	0.258561	-0.115797	0.295397	0.0459438	0.534276	-0.0563978	-0.609948	-0.189334	-0.296753	-0.0648442	-0.120271	0.158743	-0.28871	-0.141315	-0.823689	0.367982	0.514659	-0.214047	-0.102209	-0.763049	-0.0882191	-0.216583	-0.138749	0.0546851	-0.0604567	0.409402	-0.555076
SRY	-0.170787	-0.163409	-0.288504	0.0598844	-0.332518	-0.022175	0.233161	0.0951673	-0.160468	-0.14486	0.0317429	-0.207116	-0.134302	0.336064	0.0760096	-0.0495111	-0.124468	-0.30684	0.0639622	-0.0503267	0.203856	0.083916	-0.157453	-0.145338	-0.0732971	0.0919786	-0.425789	-0.254119	0.0760436	0.109315	0.0125573	-0.197894	-0.0131317	-0.144934	-0.0198193	-0.302391	0.0628587	-0.0719326	-0.263932	0.0886076	-0.173979	0.457684	-0.134851	0.159816	0.528188	-0.0105132	0.00490027	0.0365471	0.268232
SSB	-0.273414	-0.380027	-0.0836072	-0.0644294	-0.100012	0.305883	0.17445	-0.398154	0.136916	0.273203	-0.527517	-0.0662272	-0.00703516	0.572753	-0.194902	-0.181297	0.065351	0.0237215	-0.314	-0.421394	-0.380205	-0.242205	-0.429652	0.0292195	-0.340848	-0.443808	-0.111595	0.0150427	-0.640861	-0.25866	-0.260242	-0.643131	-0.221805	-0.100282	-0.351299	0.371444	0.0813429	0.0136146	0.210659	-0.364696	-0.239963	0.304357	0.0463754	1.17837	0.392172	-0.375395	1.21988	-0.192354	-0.0181128
ST5	0.467318	0.225616	0.331898	0.0793368	0.128366	0.222438	1.16057	-0.25494	0.516987	0.59038	-0.140347	0.412052	0.0628888	-0.60047	0.154632	-0.0511611	-0.133813	-0.0525567	-0.101082	0.748331	0.468065	-0.0782988	0.399979	-0.149022	0.287966	0.314273	0.407963	0.396392	-0.21961	0.67105	1.39568	0.450978	1.04281	0.452216	0.845133	0.449107	-0.6862	0.473555	-0.0216375	1.04627	0.341893	0.879331	-0.0435765	-1.19155	-0.750326	0.690536	-1.17702	0.048591	-0.787912
SST	-0.411157	-0.629987	-0.671421	-0.238299	-0.559904	-0.416144	-0.401922	-0.208296	-0.500157	-0.19662	-0.448961	-0.629427	-0.444241	0.696249	-0.282296	-0.732906	-0.512886	-0.686483	-0.336412	-0.550727	0.440534	0.309565	-0.722492	-0.744544	-0.607159	-0.599642	-0.77564	-0.543	-0.433328	-0.430072	-0.518575	-0.487394	-0.491558	-0.545415	-0.452503	-0.533302	0.193364	1.29637	-0.579327	-0.291591	-0.250404	0.0535731	-0.629878	-0.52594	-0.704951	-0.594294	-0.145836	-0.288029	-0.218493
STH	-0.393493	-0.197825	-0.363	-0.175485	-0.011551	0.304095	0.100236	0.213366	-0.0929319	-0.114297	-0.00685673	-0.196526	-0.360191	-0.197825	-0.0769325	-0.147829	-0.298017	-0.176922	-0.277863	-0.0531585	0.11291	0.11099	-0.475161	-0.346273	-0.529989	-0.468343	-0.422444	-0.35685	0.137602	-0.156417	-0.112554	-0.305407	-0.00685673	0.181708	-0.777871	0.113268	0.412593	0.0346578	-0.286643	-0.0223135	0.234003	-0.0822883	0.289352	-0.45481	0.307965	0.0182496	0.657745	-0.0424417	0.0553697
STL	-0.0107201	-0.0898038	0.053279	0.0532688	0.0144744	0.087301	0.0176	-0.177459	0.131251	0.394162	-0.0371781	0.103978	-0.0107201	0.201624	-0.140528	-0.111352	-0.000918	0.110573	-0.19389	-0.238496	0.124404	-0.0982741	-0.177946	-0.0908988	0.0924786	0.0725771	-0.0396327	0.0441862	0.0169448	-0.0921783	0.00909182	-0.126382	-0.249004	-0.0752542	-0.102777	0.0859703	0.137085	0.0235045	-0.0333238	-0.048464	0.162627	0.0377249	-0.0830943	0.322865	0.0216203	-0.0199979	0.133351	0.0702014	0.206201
STS	-0.114623	0.358309	0.114082	-0.217972	0.139374	-0.387259	0.0429955	0.12199	0.217551	-0.65496	0.855131	0.253413	0.0450655	-0.975988	0.0244564	0.0976161	0.161344	0.0184995	0.750014	0.0773635	-0.223221	0.00406291	0.0938076	-0.588605	0.303666	1.23172	1.05366	0.206272	-0.00759833	-0.0033059	-0.0536926	0.0906589	0.295721	0.00541137	0.0437715	-0.121151	-0.443446	0.253794	0.556446	-0.27897	-0.0551079	-1.38366	0.60444	-0.722105	-0.32543	0.547917	-0.498368	0.231426	-0.682885
SYK	-0.262158	0.373951	0.164026	0.169362	0.508894	0.365527	0.0546013	0.826658	0.304152	-0.738817	0.225096	-0.0612516	0.393293	-0.493182	0.375603	0.0766168	-0.235169	0.442748	0.966342	0.0743825	-0.219179	0.115763	0.142377	0.772437	0.785865	0.419731	0.196781	0.219714	-0.43559	0.382905	0.672772	0.211685	0.661459	0.00867415	0.110611	0.192612	-0.635046	-0.258141	0.66099	-0.601346	0.207548	-0.692888	-0.112251	0.0554138	0.100297	0.288024	-1.75197	0.329678	0.623974
SYP	-0.785899	-0.569346	0.206583	0.509304	-0.431852	-3.36e-05	0.119816	0.581827	-0.561369	0.0971546	-0.299757	-0.0618073	-0.233068	-0.425859	-0.0504932	-0.0392968	-0.0735978	0.147255	-0.37268	0.503869	-0.711253	-0.0244251	-0.137071	-0.107505	-0.218149	-0.273617	-0.567269	0.00291759	0.0853469	-0.21737	-0.369339	-0.0342907	-0.186445	0.0987458	-0.413379	0.189758	0.543295	-0.0413527	-0.500953	0.177011	-0.259876	0.418715	-0.0375727	-0.0616205	-0.423499	-0.46638	0.697969	-0.207989	0.667986
TAT	0.0220584	-0.264929	-0.0993354	0.0629333	-0.0212705	-0.114123	-0.0737903	0.0896554	-0.0406201	0.03113	0.150946	-0.195262	-0.293729	-0.0212705	-0.116148	0.0358014	-0.185578	-0.225779	-0.220191	-0.0766946	0.0999105	-0.120211	0.0681838	-0.00383572	0.0279145	0.072436	-0.000164	0.0806849	0.053413	0.0834132	0.279061	-0.0154848	-0.126641	-0.0878669	0.423183	-0.0231046	0.0482118	-0.152265	-0.0570613	0.030216	0.0991256	-0.0287658	0.0755723	-0.0296283	-0.161705	-0.0457697	0.220422	0.0910419	0.10905
TAZ	-0.127257	-0.126103	-0.223572	-0.0435711	-0.214728	0.226513	-0.154899	-0.107473	-0.333325	0.0211251	-0.238294	-0.170911	-0.0919531	0.243432	0.0132255	-0.012111	-0.031635	-0.210651	0.0209406	0.429296	0.18209	-0.0531077	-0.0313538	0.156329	0.0580244	-0.176755	-0.105725	-0.13733	0.107423	0.303665	-0.0105632	0.0772201	-0.0959627	-0.0251409	0.056421	-0.359737	-0.239094	-0.0798626	-0.382661	0.129917	0.0841393	0.33761	-0.369036	-0.159605	-0.139093	-0.00220561	0.958884	-0.0987918	0.158493
TBP	-0.0426359	0.281967	0.167404	-0.0231763	0.391185	-0.188233	-0.121063	-0.453728	-0.0306508	0.0567907	-0.0498608	0.0182545	0.164028	-0.085502	0.362339	0.0562483	0.0465974	0.153023	0.23986	0.123312	-0.000796	-0.248837	0.068534	0.00918424	0.226325	-0.0810747	0.255811	0.05437	-0.94601	-0.0136616	-0.229268	0.0604095	-0.202885	-0.292415	0.164504	-0.202885	-0.241568	-0.0638518	0.421882	-0.227075	0.211529	-0.153138	0.0796952	0.280326	-0.482982	0.0819868	-0.00116244	0.183613	-0.315719
RP11-399E6.1	0.172373	0.00876114	0.0285368	0.320574	-0.00677405	-0.0814499	0.178041	0.0652537	-0.0182727	-0.0372334	-0.092307	-0.172032	0.146678	0.0201799	-0.0279827	-0.167262	-0.280577	-0.0357024	-0.0311682	-0.137148	-0.0123764	0.0240482	-0.0640525	-0.183133	0.00197812	0.148251	0.118258	-0.0264872	-0.0552359	-0.0952516	-0.175577	0.0649804	-0.0481388	-0.110217	-0.0190358	0.184597	-0.192161	-0.2327	-0.0886076	0.00806007	-0.104829	0.188966	0.0366308	0.0683735	0.308146	0.0552233	0.488756	-0.131045	0.06818
TDG	-0.543533	-0.169483	-0.0939071	-0.633708	-0.142011	0.376124	-0.107028	-0.919332	-0.446167	0.0685136	-0.235784	0.0756832	-0.467695	0.522811	0.140392	0.101368	0.221779	-0.1815	-0.454135	-0.646209	-0.488382	-0.293012	-0.133923	0.0933477	-0.371473	-0.66932	-0.0888874	-0.329843	-0.722208	-0.900531	-0.0856341	-0.351374	0.438036	-0.256454	0.101772	-0.62323	0.602322	-0.333136	-0.0278992	-0.868709	-0.414309	0.794348	-0.242544	0.585842	1.64956	-0.250014	-0.290736	-0.112642	-0.266638
TDH	0.114238	0.0652914	-0.0966355	0.0449502	-0.217368	0.160755	-0.0602174	-0.0371358	-0.0126001	-0.270166	-0.0199322	-0.163174	0.011212	1.29116	-0.123583	-0.0775781	-0.204226	0.0562503	-0.0316316	-0.089013	-0.0136162	-0.233357	-0.0439632	-0.0687424	-0.148935	0.229707	-0.131378	-0.0871814	-0.0720877	-0.116123	0.153151	-0.27357	-0.138734	-0.114716	0.0517281	-0.080851	0.100429	-0.0557416	-0.113564	0.152457	0.0230608	0.163862	-0.195063	0.236736	-0.00320444	-0.0201578	1.1998	-0.0663845	0.278448
TEC	0.595599	0.315702	0.0372668	-0.180541	-0.160003	0.101824	0.11476	0.0288294	-0.253252	-0.228415	0.0479118	0.521841	-0.255674	-0.471527	0.00230766	0.0126136	-0.0638849	-0.230385	-0.025153	-0.411738	0.264238	-0.0872176	-0.0548693	0.070324	0.0342778	0.286464	0.260904	0.146396	0.0963586	0.0612474	0.109238	0.00180977	-0.236087	-0.183965	0.384377	-0.343656	-0.444299	-0.306564	-0.159043	-0.0301148	0.130546	0.268808	0.159381	0.0113096	-0.384113	0.151049	-0.564457	0.315764	0.281939
TEF	0.256429	-0.00717481	-0.17946	-0.00073	-0.0582191	0.0544336	0.0384552	0.114505	0.0236577	-0.0133734	0.00247668	-0.0945804	-0.11464	0.0547277	-0.00717481	0.00447705	-0.101006	0.126436	0.115913	-0.0679807	-0.104656	0.174301	0.0173267	-0.270712	-0.228779	0.190219	-0.128681	-0.243493	0.0391916	-0.0788111	-0.169396	0.0540815	0.0509867	-0.180058	0.0656144	-0.209873	-0.188681	-0.095015	-0.0455896	0.186198	0.0532908	0.00464785	-0.0202028	-0.0286482	0.0145463	0.0866061	0.0539826	-0.183807	0.297718
TEK	1.28143	1.18951	0.888576	1.05578	1.06863	-1.2052	0.915384	0.0855406	0.786312	-0.538433	0.671106	0.814466	0.885975	-0.696523	0.754326	0.794156	0.524271	0.930574	0.273128	1.12814	0.933451	0.761347	1.11193	-0.867917	0.907478	0.131252	0.713531	1.04986	1.87312	0.58686	0.758762	0.761075	-0.600426	1.21301	0.622589	1.0535	-0.815457	1.10601	0.647727	1.36536	1.15046	-1.23963	0.97805	-1.20394	-0.295054	0.710638	-0.590873	0.956085	-0.712256
TES	0.130347	0.191261	-0.212426	0.176456	-0.216246	0.455472	0.177105	-0.04409	-0.0122571	0.226665	-0.0955319	0.148075	0.116014	-0.127737	-0.150249	0.0597971	0.0985378	0.0366474	-0.0120331	0.144396	0.372163	0.587121	0.510739	-0.503499	-0.0482278	0.292671	-0.279846	-0.1676	0.383703	-0.00512102	0.378202	-0.043929	-0.393642	-0.0793589	0.416717	0.255296	-0.500615	0.028088	-0.431593	0.25305	0.304363	-0.549293	0.20201	-0.0790707	0.0490068	0.117789	0.281799	-0.129378	-0.299322
TFG	-0.126224	0.00402809	-0.180209	-0.451634	-0.292124	0.110042	0.17752	-0.396045	-0.141931	0.201613	0.103919	-0.0952743	0.00800855	-0.254453	-0.446988	-0.511948	-0.106331	-0.284917	-0.0256047	-0.621449	-0.130602	0.0802502	-0.175423	0.136611	-0.2891	-0.0322941	-0.329596	-0.274801	0.16763	-0.477438	-0.179717	-0.121882	0.507497	-0.148359	-0.130523	-0.421585	0.747593	-0.464578	-0.411593	-0.230456	-0.462603	-0.39216	-0.0836562	0.855318	0.41684	-0.279159	0.384108	-0.188433	-0.0643276
TK2	0.0811225	0.0131473	0.435638	0.133636	0.282494	-0.268339	0.0848773	0.0560427	0.0640195	-0.354503	-0.042574	0.0651555	0.247057	-0.211467	0.30064	0.322046	-0.0187188	0.392226	0.11674	0.730933	0.0157147	0.0224303	0.386392	0.0569141	0.276916	0.154412	0.851939	0.150495	0.224722	0.310061	0.283956	0.0125835	-0.4388	0.179145	0.216361	0.0169115	-0.385784	0.207521	0.404901	0.481899	0.29057	0.095832	-0.0191377	-0.865029	-0.137607	0.393835	-0.0700134	0.0845208	-0.100456
TK1	-1.40252	-1.66182	-1.53351	-1.24663	-0.700315	1.23186	-0.762363	-0.499428	-1.42826	0.855399	-0.325375	-1.26349	-1.20523	1.29768	-1.41023	-1.23503	-0.777306	-0.834624	-0.557603	-0.750906	-1.25459	-1.34043	-1.01397	2.34545	-1.31829	-1.05833	-0.775835	-1.08278	-1.64845	-1.47396	-1.17589	-1.14717	0.212011	-1.21526	-0.835312	-1.40812	1.82805	-1.36512	-1.44416	-1.24813	-1.276	1.55876	-1.13443	1.25694	-0.0102464	-0.540481	1.3684	-1.22387	1.5241
TKT	-0.282591	0.0427232	-0.346065	0.451389	-0.439738	0.635248	0.00508964	-0.364996	-0.00782445	-0.382827	0.361695	-0.0146236	0.112155	1.14057	-0.281397	-0.698727	0.200648	0.189739	0.322346	0.213733	-0.353997	-0.00287665	0.158457	-0.599721	-0.0455154	0.375642	-0.342939	0.0091683	-0.767017	0.44327	0.257047	0.804123	-0.308684	-0.00409013	-0.0612292	-0.486266	0.38926	-0.680667	-0.437451	-0.0691056	0.0180268	0.85413	-0.240133	-0.0675433	-0.37268	-0.0107542	0.614664	-0.257423	0.217333
TNC	-0.328354	0.518171	-0.743922	-0.241407	-0.596994	-0.433223	1.06165	-0.256781	-0.929101	3.06276	0.837225	0.12629	0.0453455	-0.259168	-0.319582	0.226047	2.38988	-0.120292	0.689941	-0.119536	-0.0515236	-0.316963	1.824	-0.334714	-0.317603	0.631018	1.59357	-1.04061	0.624073	-0.333575	3.34954	-1.13632	1.27411	0.0905987	1.34389	0.00862219	0.860397	-0.290461	0.369482	0.112938	-0.948313	-1.35126	0.331421	0.145038	0.171082	0.415924	0.139019	-0.295174	-0.369617
TNF	0.325186	0.663612	0.392171	0.0939652	-0.206806	-0.222301	0.0130206	-0.174612	-0.43508	-0.0450096	0.177382	0.689518	-0.180226	-0.515359	0.503329	-0.178808	0.143066	0.274666	-0.173319	0.19386	-0.335027	1.02801	1.11892	-0.01862	0.309031	0.341982	-0.14236	0.117491	0.138267	0.0636696	1.00953	0.365738	2.90733	0.0748464	1.09615	0.207161	-0.1478	-0.7526	-0.127598	0.390823	0.182007	-0.00576899	0.158289	-0.423985	-0.388355	1.14653	-0.275103	-0.0109527	0.169796
TNN	0.174659	0.0323281	-0.0397582	-0.092506	-0.0510866	0.526931	-0.0293226	0.0307656	-0.0797727	0.0295718	-0.148849	-0.208606	-0.089156	-0.233378	0.00956743	-0.0497223	-0.227713	-0.142871	-0.206886	0.040837	0.268218	-0.335495	-0.0978831	-0.0545912	-0.0797727	0.118779	0.606974	0.0455809	-0.136508	0.00759206	-0.0999795	-0.18492	-0.269005	0.1138	-0.244358	0.698325	0.273523	0.0525874	-0.270495	0.400317	-0.0259823	-0.0280434	-0.106535	-0.402783	-0.23897	-0.105353	0.303607	-0.131233	0.192221
TNR	0.33829	-0.218534	-0.0518281	0.00981593	-0.0658222	0.0192889	0.0105498	0.035556	-0.255789	-0.177278	-0.549365	-0.0148093	-0.0851702	-0.249021	-0.288997	0.03623	-0.438046	-0.211842	0.314012	0.0640718	-0.0629391	-0.100883	0.0208029	-0.0140257	-0.0900906	-0.383725	-0.580409	-0.146437	0.190534	-0.100558	0.0355138	-0.0399494	-0.414343	0.0413133	0.00295137	0.258524	-0.0777886	-0.00205129	-0.293821	0.325196	0.108113	0.231944	0.025147	-0.291811	0.180076	0.0555208	0.159195	-0.0475649	0.0655846
TOX	0.261057	0.353684	0.573761	0.0859883	0.560975	-0.502326	0.3999	0.130566	0.198291	-0.861561	0.101992	0.239691	0.392708	-0.316117	0.291834	0.13081	0.0690001	0.087957	0.48932	0.00959031	0.198013	-0.0209142	0.0692234	-0.192083	0.358912	0.594698	0.0914788	-0.00734237	-0.581199	0.000784714	0.616646	0.503614	-0.45518	-0.113636	0.374421	-0.158634	0.209918	0.158433	0.276035	-0.659689	0.479269	-1.28919	0.456392	-0.795299	0.0245296	-0.0422026	-0.649322	0.228211	-0.984302
TPO	-0.251906	0.178275	-0.281355	-0.146072	-0.0831526	0.859367	0.264396	0.0966522	-0.33829	-0.240733	-0.256089	-0.230815	-0.254371	0.0508066	0.117793	-0.333941	0.161156	-0.0019715	0.0129106	-0.218078	0.266227	-0.00813667	0.320743	0.0353556	-0.228515	0.0791852	-0.282791	-0.365254	0.0675087	0.116558	-0.114809	0.044284	0.0164011	-0.176939	0.131083	-0.166401	0.311101	-0.318925	-0.0668337	-0.0381586	0.187258	0.317732	0.0726404	-0.0315647	-0.0105259	0.294408	0.625708	-0.300381	0.782119
TPR	-0.285992	0.0789832	-0.374609	-0.343571	-0.37246	-0.138063	-0.160939	-0.493057	-0.23643	0.0901955	-0.102498	-0.140615	-0.00774589	-0.240381	-0.220792	-0.539507	-0.338455	-0.0122223	0.00140175	-0.30511	-0.0652914	0.380627	0.00587388	-0.502957	-0.237781	0.190785	-0.517364	-0.111111	0.0862155	-0.376469	-0.323171	0.0620647	-0.094357	-0.256084	-0.257907	-0.187827	0.477003	-0.265574	-0.234253	-0.148807	-0.262033	0.105915	-0.0490911	0.130212	-0.0991936	-0.176446	-0.160922	-0.123877	-0.492293
TRH	0.267625	-0.313895	-0.0197157	0.14403	-0.385956	-0.253498	0.109584	0.897742	-0.187904	0.178441	-0.0653173	-0.0874941	-0.462813	-0.312508	0.136865	0.0568658	-0.127397	-0.18893	-0.193509	0.130125	-0.106903	0.0205636	-0.643897	0.106464	-0.202788	-0.112288	-0.243829	-0.300536	0.153415	0.0190698	-0.279259	-0.425242	-0.310874	-0.161496	-0.288966	0.102541	-0.366664	-0.144726	-0.374506	0.4963	-0.241056	0.447466	0.0352458	-0.0991398	-0.0129633	-0.404624	-0.00495168	-0.0623797	0.328464
TRO	-0.465994	-0.159231	-0.250405	-0.64342	-0.376082	0.152528	0.0675927	0.235239	-0.529985	0.635279	-0.22351	-0.467453	-0.482255	0.142525	-0.662904	0.0313429	-0.145333	-0.0912265	-0.323288	-0.141636	-0.524889	-0.173824	-0.0697065	-0.0699134	-0.414205	0.0197893	-0.00546191	-0.328437	-0.155441	-0.443903	-0.308725	-0.259642	-0.168833	-0.152651	-0.264231	-0.352219	0.352016	-0.180466	-0.236172	-0.15012	-0.356155	-0.0528746	-0.466349	0.00321918	-0.289761	-0.0465623	0.23401	-0.508224	-0.432686
PROX1-AS1	0.00555894	0.0301563	-0.182973	0.114317	-0.216005	0.212939	-0.0562904	0.0718914	-0.14107	-0.0912404	-0.0159579	-0.0876817	-0.0360702	0.0841375	0.135647	-0.0490569	-0.128591	-0.0591514	-0.155196	-0.190677	-0.127144	-0.079283	-0.00361118	-0.187639	-0.308384	0.0505292	0.143651	-0.274999	-0.0460744	-0.108248	0.0290009	-0.0910534	-0.116094	0.0686956	0.12725	-0.0356812	0.497978	-0.256138	0.23117	0.167491	-0.0669536	0.108378	0.067088	0.0501778	0.0679121	-0.00440354	0.0194585	-0.0218033	0.0252103
TSN	-0.276517	0.114405	0.0724078	-0.13457	0.11826	0.297517	0.0679058	-0.341785	0.0510799	-0.230046	-0.281177	-0.170501	-0.108861	1.44732	-0.156964	-0.211308	-0.174537	-0.115029	0.163989	-0.158274	-0.536445	-0.27298	-0.186865	0.00482738	0.0245595	0.0493323	0.357	-0.00519153	-1.30553	-0.22116	-0.461013	-0.529204	0.280968	0.01529	-0.535551	-0.25806	0.155183	-0.129858	0.203769	-0.437854	-0.276682	0.120284	-0.603852	0.289667	-0.212708	-0.319312	0.0684143	-0.201689	-0.091567
TST	0.190046	0.706181	0.51388	0.700345	0.461636	0.56469	0.0542734	0.288715	0.631039	-0.303408	0.623901	0.430872	0.286891	0.40425	0.33661	0.414628	-0.515498	0.3191	0.56497	0.833498	-0.120376	0.450644	0.367571	-0.720482	0.625468	-0.0116646	0.274849	0.160029	-1.0936	0.549895	0.44871	1.20112	-1.03483	0.306161	0.43595	-0.00390122	-1.23936	0.247369	0.162855	-0.171502	0.528633	0.294126	-0.0771515	0.39787	-0.436335	0.296163	-1.07201	0.518578	0.571568
TTK	-2.21112	-2.33216	-2.3384	-2.1633	-1.17017	2.18254	-2.30696	-1.99292	-1.56732	1.46089	-1.13929	-2.14	-1.64454	2.71549	-2.63698	-2.12222	-2.31866	-1.87501	-0.924733	-2.06475	-2.12051	-2.53445	-2.32352	2.24127	-1.60841	-2.23633	-0.639926	-1.5845	-2.56843	-2.19605	-2.39214	-2.42157	0.542648	-2.29393	-2.04888	-2.18806	1.82674	-2.47545	-1.22774	-2.60571	-2.0025	2.4716	-1.52299	3.15999	2.12008	-1.72398	2.47394	-1.91861	0.967292
TTL	0.127873	0.0358436	0.282741	-0.428632	0.0256969	-0.00900808	0.0506093	-0.550107	-0.320196	0.0192718	0.138967	-0.300197	0.116847	-0.334803	-0.0291038	-0.219249	-0.546466	-0.00754656	-0.0545543	-0.114191	-0.126035	-0.166935	-0.140619	-0.0223583	-0.0272754	0.146872	0.0531992	0.0121453	-0.0158581	0.165863	0.145	-0.0174026	-0.155255	-0.073784	-0.255345	-0.447405	0.0924889	0.0285707	0.0717097	0.0697716	0.0580024	0.539103	0.428833	0.619164	-0.141336	0.0571665	-0.060283	0.154752	0.270388
TTN	-0.0621838	0.118363	-0.169733	-0.0105093	-0.0816721	-0.112199	0.124081	-0.0775764	-0.018209	-0.163928	-0.214271	-0.23769	0.107634	-0.329755	0.100804	0.0786375	0.00572052	0.0231219	0.0313514	-0.0108396	0.171636	0.667096	-0.0632147	-0.123489	-0.0235063	0.145925	-0.178359	-0.103496	0.159976	0.0289875	0.150883	0.0289713	-0.283314	0.0476093	0.070661	-0.124263	-0.203528	-0.0851329	-0.0290012	0.31399	0.0967461	0.033424	0.0219827	-0.370473	0.0113587	0.110721	0.350135	0.232572	0.0548602
TTR	0.155938	-0.607259	-0.31506	0.334235	-0.609775	0.0930812	0.0613713	0.221037	-0.353625	-0.37181	-0.600794	-0.250541	-0.151325	-0.557065	-0.59089	-0.376538	-0.535696	-0.628556	0.21612	-0.452167	-0.265225	-0.153526	-0.0773832	-0.629725	-0.709879	-0.380341	-0.361315	-0.575574	0.218816	-0.0514672	0.0114501	-0.519274	-0.437755	-0.348228	0.638953	0.0170706	-0.108257	-0.248376	-0.270897	0.156765	-0.289873	0.118285	-0.510528	-0.724067	-0.304893	-0.394872	0.142387	-0.409821	-0.137773
TUB	0.123525	-0.170083	-0.0979589	0.0726408	-0.284472	-0.123003	0.0991285	0.181398	-0.188698	0.236335	0.0320362	-0.0677411	-0.205049	0.0568182	-0.136114	-0.0488827	0.0293057	-0.252266	-0.203448	-0.0766571	0.268832	-0.18612	-0.120874	-0.189532	-0.173875	-0.00812499	-0.239557	-0.242249	0.0831867	0.217569	0.0426905	-0.0887586	-0.399741	0.00380951	-0.0620116	0.11528	-0.0470172	-0.0935144	-0.220832	0.115808	-0.0126127	0.200924	-0.28717	-0.248637	0.290539	-0.224068	0.593903	-0.215055	0.123769
TXK	0.364935	-0.057543	0.268888	-0.185145	-0.0769814	-0.212791	-0.115453	0.0985379	0.0487063	-0.406022	-0.295134	0.00232134	0.285506	-0.433211	0.151082	-0.240371	0.12211	-0.0354092	0.276637	0.0911206	0.903426	0.281524	0.329577	1.02969	-0.164794	0.365979	0.20757	0.260918	0.630692	0.35875	0.0492416	0.133412	0.0852454	0.38032	0.0586347	0.0611312	-0.248085	0.319311	-0.220199	0.578013	0.393701	-0.147529	0.0622955	0.0580535	-0.0736599	0.0736741	-0.269395	0.0888823	-0.243822
TXN	-0.0334571	-0.116055	-0.0552052	-0.62286	0.0622702	0.982851	-0.477603	-1.05626	0.0250468	0.10705	-0.116284	0.119264	0.18167	1.61122	0.20303	-0.485387	-0.243897	-0.285305	0.178592	-0.803595	-0.252401	0.00919521	-0.54458	0.807944	0.152554	-0.247932	0.430263	-0.0186539	-0.219139	-1.22972	-0.384409	-0.136154	-0.0134671	-0.166268	0.0385975	-0.047467	0.724331	-0.303407	0.473138	-0.795234	-0.0347069	-0.761375	0.310784	1.41297	1.08755	-0.420657	0.412688	0.217378	-0.0155965
TYR	0.042282	0.436553	-0.053447	0.0505136	-0.0828071	-0.0708552	-0.0794255	-0.0666696	0.0913365	-0.0111061	-0.0539114	0.110293	-0.0864799	0.0183885	0.0245185	0.0293212	-0.0459584	-0.0559074	0.108937	-0.0850489	0.244801	-0.0290275	0.132053	-0.0880913	-0.281066	0.0119768	-0.0565908	-0.0881464	0.113	-0.0465958	-0.0280614	0.102733	-0.023137	-0.104814	0.110126	-0.0151295	0.252361	-0.0847175	-0.0198611	0.104198	-0.130884	-0.072992	-0.0157825	-0.0349517	0.0228548	0.107939	0.183805	0.0794632	0.199265
UBB	0.269367	0.283436	0.291683	0.0846361	0.293778	-0.506675	0.1018	-0.266335	0.326527	-0.211455	0.221407	0.258226	0.215532	-0.0647685	0.198476	0.160526	0.0430803	0.115088	0.167352	0.0719956	0.1525	0.0909119	0.139272	-0.257069	0.304736	0.249557	0.238761	0.143374	0.375918	0.0591976	0.29406	0.055184	-0.128262	0.272413	0.315537	0.0842361	-0.763613	0.165889	0.236494	0.0576654	0.293166	-0.724117	0.228905	0.138159	-0.0272453	0.246563	-0.103806	0.342672	-0.0417019
UBC	-0.0272855	0.0627193	-0.0306503	-0.181794	-0.219942	-0.0353666	0.0911992	-0.280652	-0.014162	0.134739	0.0162286	0.321034	-0.11255	-0.22109	-0.049376	0.00579802	0.231832	0.00815876	0.0338312	-0.0707232	0.0167908	0.334887	0.0197257	-0.154414	-0.0257472	0.292006	-0.183562	0.141742	0.618054	0.0354225	0.210469	0.0340867	0.324855	0.281739	0.0814405	-0.00567955	0.242701	0.0990964	-0.0149823	0.192078	0.0462153	-0.492391	0.0653199	-0.222628	-0.266354	-0.073899	-0.718405	0.0474875	-0.258498
UCN	-0.424085	0.028617	0.183411	0.0314663	-0.22197	0.480449	-0.446701	-0.340679	-0.379702	-0.332121	-0.52875	-0.163902	0.106649	-0.0436212	0.410771	0.0408617	-0.0094411	0.146741	0.0896604	0.258754	-0.422345	-0.121009	0.341727	-0.100676	0.0356605	-0.237566	-0.0371153	-0.174185	0.24642	-0.208442	0.160623	0.268988	-0.164468	-0.153983	0.173186	-0.287004	-0.290406	0.00572198	-0.0641387	0.0992194	-0.273588	0.506134	-0.166964	-0.502771	-0.255374	-0.0229145	0.207806	0.00330015	0.427025
FSIP1	0.114469	-0.220777	0.00445159	-0.146015	0.0871708	0.184463	0.022512	0.05859	0.757976	-0.151904	-0.0801872	0.00379484	0.138175	0.0221872	-0.14802	0.302364	0.0769672	-0.210959	-0.185113	-0.1576	-0.011483	-0.00635738	-0.132747	-0.139204	0.181974	0.258155	-0.0897645	0.0538927	-0.0217019	-0.069437	-0.0540986	-0.00214943	0.0359372	0.234747	0.186895	0.336572	0.0594018	0.1217	0.148241	0.156091	0.0306313	0.302786	-0.0978001	-0.219664	-0.0598503	-0.166383	0.131958	-0.0209028	-0.0742733
FSIP2	-0.0565136	0.000437	-0.166364	-0.0826677	-0.0815099	-0.180069	-0.26702	-0.175551	0.12786	-0.0598772	-0.222614	0.0645118	-0.0582147	-0.0202282	-0.028576	0.243113	-0.0935174	-0.0691857	-0.199153	-0.0247601	-0.0772957	-0.13456	-0.0688627	-0.209238	0.296975	-0.101266	-0.0465823	-0.0873025	0.167687	-0.138421	-0.0184068	-0.264175	-0.010541	-0.123095	-0.00601684	-0.123474	-0.158373	-0.0846563	-0.145037	0.0933757	0.0450531	-0.023443	-0.111357	1.81523	0.102032	0.0401654	-0.0126006	-0.0905649	0.140469
UNG	-0.831115	-0.776917	-0.52377	-1.16808	-0.316538	0.410363	-1.02498	-1.32991	-0.43522	0.109253	-0.100525	-1.05228	-0.455719	1.75758	-0.864479	-0.799349	-1.07251	-0.690635	-0.118325	-0.484461	-1.26184	-0.747558	-0.400114	1.27957	-0.624738	-0.952219	-0.0138154	-0.482238	-1.45141	-0.628243	-0.961937	-0.485871	0.643254	-0.582278	-0.762063	-0.798333	0.0872915	-0.499336	0.087949	-1.15234	-0.340303	1.22849	-0.504516	1.2616	0.253621	-0.606816	0.755999	-0.66198	0.450453
UNK	-0.196576	-0.0884189	-0.0982217	-0.094828	-0.312189	0.235627	-0.228195	0.0200599	-0.347981	0.0515566	-0.486641	-0.266486	-0.201944	-0.0958952	-0.146402	-0.15438	-0.040683	-0.249826	-0.280268	0.0847356	-0.161336	0.047887	-0.153849	0.286962	-0.209461	0.0356234	-0.112157	-0.269156	-0.196365	0.314606	-0.291055	0.144862	0.194909	-0.104839	-0.308356	-0.024758	0.0970616	0.16424	-0.196613	0.188069	-0.177598	0.456483	-0.22173	0.0491408	-0.0607106	-0.142677	0.357582	0.00313992	0.111707
UST	0.226895	0.575002	0.663847	0.168693	0.506207	0.187168	0.940954	0.0255859	0.670253	0.0824006	0.43866	0.430137	0.236382	1.17436	0.417077	0.388237	0.705541	0.349217	0.398529	0.488543	-0.222875	0.253384	0.438141	1.08713	0.229523	0.688925	1.04986	0.746098	-0.0942247	0.159483	0.554992	0.125708	-0.508725	0.531096	0.365212	0.369636	1.28956	0.534597	0.921631	-0.240587	0.197501	0.768942	0.200168	2.04869	0.445982	0.605248	0.482245	0.0437519	0.712014
UTY	0.341948	0.489737	0.428706	-0.00155588	0.939436	-0.30189	0.190787	0.313244	0.431305	0.399964	0.438503	0.484707	0.608775	-0.407601	0.519251	0.316637	-0.673357	0.710829	-0.504359	-0.184773	0.288208	0.539922	0.545915	0.24148	0.674289	-0.142518	-0.549523	0.756155	0.182771	0.154084	-0.0987523	0.329517	-0.604278	0.362198	0.236649	0.150018	0.519777	-0.724043	-0.55448	-0.0882304	0.0664716	-0.497932	0.533703	0.160154	0.0878418	0.358974	-0.551995	0.176097	-0.720498
UXT	-0.383034	-0.0240219	-0.225008	0.367294	-0.448917	0.0884472	-0.0054834	0.563912	-0.257252	0.159235	-0.234922	-0.103608	-0.569946	-0.454609	-0.100495	-0.0316342	0.255345	-0.0408389	-0.247874	0.146218	-0.260069	-0.0493497	-0.152135	-0.0863689	-0.109	0.0350401	-0.36645	0.0123963	-1.00943	0.152444	-0.241986	-0.468966	0.278459	0.00320572	-0.347672	-0.0981548	-0.0266045	0.00522341	-0.280357	-0.589576	-0.156053	-0.154591	-1.18035	-1.46935	-0.697422	-0.251909	0.779263	-0.521268	0.359503
VCL	0.0248095	0.103958	0.348009	-0.0848733	0.00792746	-0.726994	0.327861	-0.250301	0.108402	0.545386	0.407049	0.32885	0.306767	-0.127315	-0.0635744	0.293732	0.081829	0.344838	0.235496	0.206324	0.106561	0.499253	0.483365	-0.489661	0.297223	0.291761	0.1649	0.379251	0.827085	0.185237	0.177787	0.0872907	0.195332	0.255653	0.353404	-0.073141	-0.0512554	0.42168	0.0678275	0.461073	0.181834	-0.0199916	0.343876	0.0114218	-0.0259179	0.239627	-0.132414	0.233572	0.12252
VCP	-0.27421	0.175811	-0.0761668	-0.120531	0.00764686	0.255432	0.0215954	-0.0802035	-0.060432	-0.376043	0.15719	0.41026	0.0158249	0.690034	-0.213394	-0.149284	0.092802	0.198785	0.189563	-0.00041529	-0.168008	0.0383965	0.0538396	0.764991	0.310824	0.270956	-0.0877783	0.0523504	-0.135119	0.0833215	0.251998	0.0039972	0.180974	-0.16003	-0.00216874	0.0644366	-0.0314888	-0.262983	-0.0293767	-0.127691	-0.348976	-0.853172	-0.335115	0.0528576	-0.00935123	0.0840483	-0.505297	-0.221984	0.198746
VDR	-0.0908055	-0.265805	0.00601204	-0.202137	-0.314654	0.143142	-0.126404	0.00265303	-0.385993	0.46258	-0.19744	-0.10178	-0.204505	-0.332849	0.34767	-0.197174	0.572892	0.0457053	-0.324689	-0.00304559	0.0608597	0.170091	-0.366153	-0.253345	-0.364507	-0.0682995	-0.261092	-0.262556	0.211298	0.185482	0.239911	0.44635	-0.0884194	0.1804	0.199033	0.00390504	0.469273	-0.365595	-0.405248	0.215906	0.196241	-0.234088	0.210405	-0.267054	0.400298	0.0663643	-0.22461	0.0850686	-0.562416
FAM181A-AS1	-0.293612	-0.143906	-0.441538	-0.272088	0.224849	0.0775994	0.180079	0.114181	-0.203582	-0.0541197	0.00416905	-0.066992	-0.163473	-0.00529097	0.154561	-0.0413453	0.10714	-0.387192	-0.0556109	-0.0420411	0.263829	0.0199054	0.225477	0.118776	-0.139305	0.142828	0.0551326	-0.117082	0.110305	-0.00268231	0.0724407	-0.114408	-0.119361	-0.228933	-0.0270302	-0.0245714	0.474864	-0.311393	0.136466	-0.112825	-0.0117561	0.106537	-0.212828	-0.0387239	0.0673624	-0.125224	-0.0408201	-0.31596	0.375182
VGF	-0.345619	-0.170639	-0.255261	0.157774	-0.348664	-0.368643	0.0326649	0.241613	-0.30557	0.121289	-0.118636	-0.514103	-0.547413	-0.253519	-0.000705	0.0677156	-0.0514331	-0.328653	-0.517945	-0.098626	-0.565464	-0.128109	-0.547007	0.133836	-0.303255	-0.414326	-0.547634	-0.4605	0.0815711	-0.488339	-0.687741	-0.0223863	-0.17691	0.156897	-0.587868	0.01094	0.0073259	-0.0245853	-0.736537	0.049787	-0.36326	0.29084	-0.232469	-0.113912	0.428359	-0.422603	0.37806	-0.142896	0.280983
VHL	0.0576587	-0.275858	-0.414584	0.0940495	0.0394357	-0.14413	0.0437862	0.23382	0.0904185	0.0459164	0.129432	0.100293	-0.1299	-0.130806	0.0425341	-0.0663462	-0.424777	0.0404889	0.230732	-0.14121	0.0429906	-0.158915	0.164149	0.105304	-0.395233	0.268356	0.183651	0.0461287	-0.289056	-0.19629	0.124047	-0.359011	-0.0110051	0.0812437	0.104045	0.0216031	0.325389	-0.00463556	0.0656611	-0.0171732	-0.0243244	0.29704	0.105454	0.0938571	0.106546	-0.323349	-0.0201164	-0.162896	-0.00480482
VIM	0.252292	0.839129	1.39052	0.0277715	1.34029	-1.1771	0.541767	-0.419972	1.29785	-0.155849	1.90131	0.779467	0.461476	-0.662294	1.29486	1.2921	0.869421	1.1356	0.741206	-0.0177163	1.03598	0.414763	0.572867	-0.374479	1.30377	0.320673	1.12105	1.32665	0.210948	0.0518402	0.296853	1.09198	-0.195759	0.804646	0.447657	0.603484	-0.673916	0.933162	0.497669	0.210676	0.108786	-1.60456	1.54579	-1.85956	-0.514451	0.980046	-1.45915	0.354026	-0.895312
VIP	0.358805	0.460621	0.301998	0.444665	0.294534	0.0184743	0.170597	-0.155574	-0.0362782	-0.231459	0.390805	0.0205106	0.520486	-0.0445068	0.420811	0.106358	-0.202546	-0.221207	0.460596	0.220588	0.168661	0.0415765	0.498996	0.0346305	0.260391	0.1422	0.653556	0.350232	0.303647	0.244642	0.287387	0.087397	-0.311542	0.264728	-0.0474987	-0.161007	-0.220535	1.2072	0.484499	0.151591	0.367831	-0.123612	0.488911	-0.0443163	-0.169378	0.137282	-0.107194	0.669792	-0.303607
VIT	-0.0271953	-0.452101	0.145919	-0.0702684	-0.344373	-0.0249131	-0.179768	0.395767	0.145651	0.300646	-0.166877	-0.181499	-0.363828	-0.147498	1.45654	-0.279251	-0.222289	-0.17977	-0.379223	-0.225346	0.752058	0.0899242	-0.210393	-0.266869	-0.470678	-0.464599	0.121734	-0.053302	-0.224846	-0.291462	-0.22033	-0.513185	-0.277697	-0.321804	-0.326894	0.587984	0.285651	0.934634	0.82179	0.378897	-0.384195	0.131358	0.168776	-0.320192	0.166935	0.768936	-0.317269	0.0798313	0.282846
VWF	0.463531	0.674891	0.613845	0.763184	0.726802	0.200987	0.936884	0.240588	0.491736	-0.491391	0.61941	0.547026	0.388463	-0.450254	0.746316	0.915584	0.67917	0.838656	0.508478	0.718035	0.569355	0.486387	0.880152	-0.349497	0.889676	1.67611	0.505741	0.774436	0.954817	0.584255	0.536531	0.412398	-0.551627	1.13096	0.510937	0.78397	-0.504387	0.615763	0.4342	1.17558	0.946034	-1.01827	0.577626	-1.1035	-0.230584	1.1527	-0.928716	0.41937	-0.307688
WAC	0.103879	0.343182	0.137206	0.0121867	0.0819871	-0.353314	-0.00869841	-0.188698	0.0944941	0.11158	-0.10764	0.0344535	0.153937	-0.0635837	0.018182	-0.0528789	0.252366	0.00607743	0.111617	-0.0320625	0.25874	0.155617	0.121036	-0.0415575	0.0015835	0.0680874	-0.0118364	0.133495	0.316187	0.00940507	-0.112237	0.0786125	0.0473713	0.0243023	0.195684	-0.0197572	-0.511383	-0.0382724	0.210522	0.117165	0.179382	-0.465799	0.153808	0.154484	-0.245215	0.0255463	-0.576876	0.342715	-0.199146
WAS	-0.175851	-0.164661	-0.152215	0.195356	-0.257836	-0.494296	-0.14989	0.717898	-0.220636	-0.0752959	-0.029074	0.196656	-0.278788	-0.432729	0.533097	0.0680775	0.554877	0.108454	-0.0791265	0.516275	0.0603149	0.194473	-0.116685	0.439183	0.0430558	-0.384032	-0.128653	0.0142189	0.403807	0.423315	0.192468	0.147023	0.0504671	0.0553797	0.0845844	0.018827	0.0122825	-0.00892611	-0.246942	0.37687	-0.0691448	0.346562	-0.115636	-0.620985	0.109323	0.0029488	0.104998	-0.0970262	0.501464
CNN2P10 /// CNN2P10	0.107827	-0.00690926	-0.246895	0.0916642	-0.575969	0.480993	0.01094	0.48461	-0.399302	0.186924	0.138666	0.0556524	-0.510626	-0.18893	-0.149801	0.0222566	-0.233546	0.00321787	0.0106831	-0.0886136	-0.187234	0.0719213	-0.00250397	0.0152665	-0.501289	0.146701	-0.170568	-0.164789	0.290778	0.0290409	0.211671	0.112164	-0.0899884	-0.0142513	0.175072	-0.239992	0.48233	-0.00215691	-0.3319	-0.00857497	0.0953021	0.0516538	-0.0757644	-0.252648	0.0240365	-0.11875	0.575596	-0.320118	0.404297
WIZ	-0.317161	-0.13203	-0.353602	-0.120415	-0.576052	0.421953	-0.22349	0.0633004	-0.305547	0.178451	-0.0713627	0.0499263	-0.183984	0.288124	-0.230668	-0.254572	0.296752	-0.0696337	-0.263892	-0.0359409	-0.334901	-0.0626837	-0.0901193	0.146639	-0.256362	0.0552744	-0.237018	-0.383478	-0.250749	0.0198914	-0.0136081	-0.0501994	-0.14695	-0.196111	-0.0923424	-0.251823	0.436647	-0.274502	-0.508761	0.0475158	-0.308406	0.48238	-0.316134	-0.230132	-0.139169	-0.0199327	1.11335	-0.363619	0.591852
WLS	0.204585	0.578337	0.249026	0.126047	0.663311	-0.97414	0.650484	-0.430579	1.18911	0.114407	1.26847	0.483261	0.685979	0.0825553	0.439061	0.872558	0.775356	0.91596	0.488645	0.733798	0.379985	0.531457	0.595806	-0.992634	0.668458	0.915548	1.48683	1.00225	0.404033	0.388237	0.0272699	0.10563	-0.278098	0.983507	0.0447363	0.465643	-0.229462	0.49333	0.806824	0.471912	0.660077	-1.9954	0.353052	-0.253805	-0.283197	0.665085	-1.96615	0.639247	-0.533161
WRB	0.977504	0.144844	0.278249	0.0529021	0.178243	-0.937984	0.0738091	-0.585725	1.45365	-1.19447	0.375824	-0.110589	0.232809	-0.703802	-0.0193937	0.54913	-0.166586	-0.21991	-0.198602	-0.298414	0.306458	0.4089	0.261029	-0.321585	-0.00607339	0.107252	0.194207	0.388755	-0.202437	-0.249239	-0.0384932	0.241758	-0.0158853	0.125747	-0.348528	0.742963	-0.522782	0.552222	0.255491	-0.139892	0.293067	-1.75509	0.113453	-0.359607	-0.180681	0.0484095	-1.81282	0.339444	-1.53991
WRN	-0.0786379	0.159678	0.309959	-0.893686	0.200996	0.228397	-0.269139	-0.255542	-0.0413189	-0.00644334	-0.257108	-0.0713619	0.0015205	-0.0666114	0.216721	0.198542	-0.126804	-0.349297	0.00233079	-0.545446	-0.221637	-0.326686	-0.34844	0.0381651	-0.0415554	0.00749965	0.304974	-0.1281	-0.167173	0.0152811	-0.241919	-0.392458	0.187417	-0.18841	0.170725	-0.340274	-0.0788658	0.212027	0.172746	-0.397432	0.0548273	0.190065	0.285304	0.832779	-0.00305586	-0.21804	1.31609	0.154012	-0.330009
WT1	-0.751507	0.305537	-0.236379	-0.344911	0.13332	-0.436758	-0.24915	1.65466	-0.638225	0.404917	-0.46077	-0.227861	-0.143959	-0.04365	0.474237	-0.205325	1.29477	-0.34544	-0.320516	-0.469705	-0.343684	0.347841	-0.436519	-0.766331	-0.285184	-0.346288	-0.299335	-0.277829	-0.33674	0.541733	-0.320977	-0.73524	0.105151	-0.722038	0.134324	-0.820007	0.527521	-0.796598	1.72876	-0.389662	-0.490888	0.019191	-0.456311	-0.46752	0.240418	-0.0392847	-0.425967	-0.0281601	0.00761139
OSGIN1	-0.508212	0.106312	-0.239325	0.0115586	-0.592944	1.85083	-0.085509	0.326971	-0.353428	-0.398163	-0.0333913	0.234499	-0.154401	1.58513	-0.391983	-0.25396	0.136637	0.300849	-0.308299	-0.239436	-0.928145	-0.324637	0.0628831	0.214763	0.318259	-0.110484	-0.37995	-0.259993	-0.0838696	-0.107066	0.0717629	-0.169886	-0.154356	-0.138159	-0.0124811	0.0860041	0.420554	-0.0911446	-0.461437	0.21133	-0.331652	0.172208	-0.547725	0.0117231	0.674704	-0.0732713	1.83669	-0.753398	1.49377
OSGIN2	0.080135	-0.00437664	0.0855453	0.0858936	-0.0942367	-0.321414	0.0398148	-0.270726	-0.0777704	-0.0798922	0.102624	0.248754	-0.0774434	-0.0701789	-0.149897	0.347889	0.163585	0.0736178	0.0129952	-0.223012	-0.104426	0.368788	0.363027	-0.392781	-0.0237149	0.123972	-0.16916	0.0795223	0.836693	-0.147723	0.155415	-0.149689	-0.0261442	0.157715	0.437606	-0.154618	-0.170053	-0.104104	-0.0426996	-0.146303	-0.00905387	-0.494548	0.37626	-0.265546	-0.512075	0.134681	-0.398031	0.293934	-0.636482
RPS10P2 /// RPS10P2	-0.314837	-0.707897	-0.0197344	0.184091	-0.595864	-0.167399	-0.359929	0.493417	-0.613499	0.602876	-0.603134	-0.797998	-0.708063	0.558394	-0.197663	0.0244562	0.0090093	-0.742284	-0.292401	-0.0333352	-0.306429	-0.0598653	-0.629959	-0.251332	-0.442602	-0.775734	-0.476148	-0.3734	-0.511957	-0.361873	-0.426461	-0.545148	-0.274378	-0.158398	-0.235912	-0.204335	0.206339	0.378322	-0.305818	-0.435576	-0.288751	0.31773	-0.773464	-0.0494409	-0.600322	-0.462451	0.750303	0.673085	-0.340559
XDH	-0.679983	-0.784442	-0.453388	-0.491691	-0.711069	0.0346167	-0.515542	0.0866937	-0.89135	0.92287	-0.501055	-0.61022	-0.799944	-0.672815	-0.492217	-0.460333	-0.798266	-0.669633	-0.862794	-0.441903	-0.478461	-0.747384	-0.906231	-0.309542	-0.710533	-0.911771	-0.395886	-0.869585	-0.488133	-0.436231	-0.834573	-0.262976	2.24184	-0.574516	-0.245781	-0.181321	-0.468744	-0.0242719	-1.00128	-0.380801	-0.491865	0.811101	-0.449665	0.589326	-0.454339	-0.716161	-0.502629	-0.39164	-0.327943
CACNA1B	-0.498057	-0.373659	-0.462861	-0.355373	-0.346625	0.708686	0.0258725	0.0576939	-0.358323	0.406227	-0.492634	-0.197998	-0.35019	0.647704	-0.328898	-0.106178	-0.233046	-0.137718	-0.243971	-0.160302	-0.199901	-0.31217	-0.288115	0.713206	-0.432672	-0.361617	-0.308131	-0.314663	-0.103201	-0.216113	-0.154155	-0.255594	-0.244106	-0.195652	-0.335724	-0.172819	0.018776	-0.26927	-0.435382	-0.00576556	-0.552326	0.300044	-0.0903391	0.97493	-0.0985635	-0.0783576	1.19812	-0.372649	0.0665629
CACNA1D	0.763181	1.02292	0.635054	0.350967	0.876336	-0.90348	0.227765	-0.511128	0.514921	-1.01095	0.310625	0.183177	1.04213	-1.1143	0.174777	0.682829	-0.255965	0.918062	-0.0110853	0.773245	0.564116	0.0229229	0.809137	-1.13463	0.964461	0.798874	1.54616	1.02835	0.220213	0.544095	0.642116	0.645831	-0.923822	0.426892	0.282767	-0.0479445	-0.978378	0.358075	0.312277	0.954427	0.925456	-0.586886	0.645126	-1.2188	-0.712258	1.35725	-0.729901	0.732964	-0.531224
CACNA1C	0.328119	0.226081	0.335087	-0.0190251	-0.0831523	-0.152135	0.0111203	0.126595	-0.0802047	0.0903355	0.0704988	0.0839956	0.237108	-0.174804	0.0638949	0.274515	0.270133	0.261036	0.0880352	0.408794	0.441996	0.0314567	0.277026	-0.287004	0.341752	0.25345	0.357738	0.0159758	0.117676	0.280566	0.512322	0.109805	-0.239526	-0.0327297	0.0986185	0.0496242	-0.290454	0.476541	-0.0101812	0.288181	0.293524	-0.108499	0.0664853	-0.234933	0.0397874	0.289665	-0.256604	0.225528	-0.101685
CACNA1F	-0.349051	-0.328101	-0.196787	0.340582	-0.415833	-0.0249358	0.0712559	0.312584	-0.444456	-0.0138368	-0.148739	-0.342197	-0.364891	-0.47965	0.194284	0.12067	-0.271302	-0.442061	0.450206	0.135499	-0.0196374	0.14687	-0.0757167	-0.00671469	-0.470737	-0.123542	-0.649384	-0.239595	0.0199542	-0.0758595	-0.160736	-0.504895	-0.116784	-0.105422	-0.342122	0.00997882	0.0729653	-0.0196374	-0.664566	0.25895	-0.115496	0.427144	-0.242799	-0.42844	0.265322	-0.178234	-0.17092	-0.415261	0.716932
CACNA1E	0.0257084	-0.0712995	-0.020082	-0.0190866	-0.251622	0.120038	0.0752303	0.110443	-0.0762306	-0.0928497	-0.0630921	-0.098383	-0.11719	-0.102369	-0.0389373	-0.0218975	-0.0984167	-0.211527	-0.0829922	-0.0753043	0.00780961	-0.105634	-0.0793537	-0.0279656	0.0217086	-0.0511428	-0.114135	-0.0470705	0.209022	-0.00882174	0.0462955	-0.0905252	-0.193635	-0.0922564	0.0841223	-0.103998	0.111259	-0.0777858	-0.128852	0.209279	0.050595	-0.0695817	-0.0687836	-0.0138071	0.0774004	-0.0229823	0.251123	0.0370485	-0.0176273
CACNA1H	-0.334708	-0.0624292	-0.0497521	0.101597	-0.440904	-0.0194084	0.00153481	0.169055	-0.622133	0.0498628	-0.157613	-0.108669	-0.181763	-0.372524	0.0003216	0.0220151	0.143408	-0.25959	-0.213292	0.050962	-0.18259	0.0291141	0.0751073	-0.150834	-0.526116	-0.193208	-0.516216	-0.211359	0.402353	-0.236312	-0.279948	0.0859039	-0.301868	-0.0261633	-0.296906	0.000174904	0.0946268	-0.0185336	-0.336778	0.195794	-0.320961	0.36603	-0.0897403	-0.137521	0.0853334	-0.0426953	0.683799	-0.0231441	0.217427
CACNA1G	-0.206624	-0.161719	-0.20142	0.2118	-0.302777	0.0519922	0.0751901	0.215899	-0.345518	-0.0306963	-0.0705003	-0.191938	-0.251854	-0.25729	0.0666983	-0.0338517	0.175328	-0.0902192	-0.284507	-0.0877968	-0.0428736	-0.0666119	-0.121106	-0.0115644	-0.285084	0.000147	-0.134028	-0.155792	-0.0559406	-0.0103996	-0.121186	-0.232139	-0.148339	-0.0887789	0.0976897	-0.0528716	0.22979	-0.167585	-0.175544	-0.0822593	-0.12344	0.492645	-0.0609673	-0.199644	0.0315079	-0.084175	0.159888	-0.37458	0.24768
CACNA1I	-0.391886	-0.229205	-0.193996	-0.0240891	-0.539751	-0.122867	0.104846	0.30239	-0.229361	-0.164653	-0.16853	-0.0400868	-0.255149	0.0976681	-0.222079	0.0478267	-0.131798	0.264998	-0.0989119	0.0692117	-0.720931	0.00667797	-0.203499	0.162933	-0.577742	-0.306669	-0.37115	0.0267666	0.137585	-0.237229	-0.439243	-0.140532	-0.0803116	0.172288	-0.162667	0.0116683	0.000336	0.00886699	-0.26565	0.491148	-0.379006	0.653253	0.163244	-0.0694173	0.101654	-0.345511	0.18938	-0.135991	0.617753
CACNA1S	-0.0542395	-0.554993	-0.197532	-0.0556128	-0.358207	0.56531	0.0135534	0.516674	-0.0973315	0.234636	-0.152161	0.0574954	-0.533647	0.224579	-0.0285007	-0.243524	-0.145053	-0.153175	-0.129292	-0.125052	0.330586	-0.259721	0.0996523	0.00224963	-0.44255	0.163164	-0.114617	-0.267125	0.208088	-0.0548789	0.369296	-0.0453213	-0.00562102	-0.150101	-0.0636307	0.164763	-0.0125743	-0.2727	0.0834009	0.299658	-0.249851	0.145711	-0.0937032	-0.530411	-0.22936	0.0956918	0.214919	-0.0654543	-0.0265977
XPA	-0.103935	0.585343	0.644933	0.328595	0.472708	0.921553	0.234716	-0.446088	0.183132	-0.340896	-0.0953244	0.0144296	0.344625	0.703903	0.555747	0.467539	-0.0702233	0.347193	0.296339	0.545215	-0.153798	-0.00806409	0.397947	0.824197	0.597777	0.115177	0.775239	0.274258	-0.680377	0.0799408	-0.0383791	-0.158769	-0.336818	0.217915	0.127932	0.363537	-1.13615	0.508282	0.646486	-0.416622	0.198458	-0.851441	0.15222	1.18982	-0.0556861	0.209066	-0.419374	0.220394	1.3596
XPC	0.375438	0.555401	0.780923	0.0822596	0.147081	-0.678508	0.511421	-0.263585	0.326716	-0.377585	0.243116	0.0131785	0.216399	-0.361823	0.738197	0.514897	0.690637	0.363403	0.316851	0.558157	0.174396	0.496527	0.457426	-0.31296	0.427644	0.614893	0.359502	0.403263	-0.349852	0.60039	0.196563	0.45375	-0.298932	0.560055	0.218506	0.450669	-0.699593	0.722534	0.108668	0.894299	0.535718	-0.121766	0.167282	-0.908671	-0.455131	0.607123	0.225562	0.484919	-0.526947
YY1	-0.0147024	0.00169267	0.0409834	-0.315853	0.0440099	-0.0972452	-0.239995	-0.268294	-0.141797	0.236594	-0.123977	-0.350994	0.0856384	0.0852184	-0.245601	-0.32184	-0.101608	-0.00867887	0.0189913	-0.238585	-0.0137747	-0.0592592	-0.30361	0.149758	0.095117	0.0301332	-0.185517	-0.16087	-0.153927	-0.398855	-0.131296	-0.0650727	0.143639	-0.250078	-0.148593	-0.120314	0.0979895	-0.119945	0.132851	-0.140998	-0.212078	0.10962	-0.0466719	0.0320728	0.0144839	-0.082203	0.092818	0.235839	-0.0210747
ZAK	0.454523	0.191466	0.730871	-0.198153	0.148163	-0.369355	0.160555	-0.374159	0.129564	0.155733	0.212208	0.097243	0.101568	-0.303603	0.507162	0.597491	0.766482	0.423554	0.199249	0.412821	0.719414	0.518381	0.727246	-0.892065	0.221263	0.615924	0.580805	0.328893	0.406094	0.231289	0.310239	0.367325	0.0932325	0.744623	0.525084	0.198576	-0.791061	0.887857	0.237013	0.291449	0.814501	-0.672631	0.719724	0.918679	0.110283	0.385738	-0.612425	0.676103	-0.808861
ZAN	-0.14993	-0.292893	-0.215111	0.239064	-0.481716	0.0212523	0.0299771	0.31843	-0.227971	0.0753927	0.0449945	-0.254407	-0.179003	-0.0761829	0.141461	-0.181933	-0.105036	0.0128722	-0.225354	-0.0673706	-0.187742	-0.117115	-0.0169323	-0.184311	-0.414079	-0.194085	-0.310851	-0.215612	0.22444	-0.102352	-0.0851462	-0.229736	-0.0612366	0.0043596	0.0724035	0.0619414	0.142499	-0.0765401	-0.364515	0.437865	-0.000367	0.391646	0.0491082	0.0525612	0.173853	-0.0409524	-0.186654	0.045272	0.440323
ZFR	-0.443239	-0.0523271	-0.68822	-0.361117	-0.225326	0.19162	-0.111008	-0.493387	-0.174024	-0.0888567	-0.224737	-0.192968	0.185308	0.511002	-0.731334	-0.934998	-0.419518	-0.424124	0.126294	-0.366587	-0.281788	0.161649	0.00798748	0.153881	-0.199862	0.0837696	-0.540462	-0.129897	-0.262969	-0.843275	-0.210834	0.043766	0.172502	-0.310712	-0.334993	-0.670825	0.176255	-0.638863	-0.239036	-0.60245	-0.595781	0.337118	-0.190802	0.519798	0.0518512	-0.134466	-0.0844984	-0.477606	0.766392
ZFY	0.525836	0.0243542	0.643234	0.228005	0.82731	-0.558504	0.058997	0.364396	0.56408	0.78108	0.277057	0.590579	0.195264	-0.352036	0.528582	0.370203	-0.725852	0.263822	-0.682722	0.203225	0.585188	0.95763	0.0230881	0.175134	0.0646863	0.294006	-0.585967	0.745103	0.496372	0.210415	0.170614	0.655341	-0.781028	0.798909	-0.0944098	-0.0086628	-0.0262733	-0.594264	-0.699446	-0.0136223	0.335494	-0.542656	0.847777	0.852036	0.134727	0.075631	-0.493283	0.938629	-0.600293
ZFX	0.0065294	0.0161954	0.0189672	0.0134932	-0.000357857	-0.407847	-0.0606021	-0.245343	0.00230852	0.137786	-0.0942249	-0.082373	-0.0750186	0.352451	-0.206076	-0.116245	0.429478	-0.343775	0.159771	-0.127506	-0.00641054	-0.05709	-0.190867	-0.174161	-0.166021	-0.140331	0.123108	-0.104091	-0.062542	-0.301199	-0.0943595	-0.240701	0.2882	-0.124948	0.0332956	-0.149484	0.725512	0.204143	0.232426	-0.31732	-0.158505	-0.024506	0.0574463	0.37231	0.548252	-0.0683966	0.0203191	0.141179	-0.0794253
ZP1	-0.0664374	0.166828	-0.191529	0.0783405	-0.346614	0.604059	0.354199	0.00119351	-0.138397	-0.118185	-0.198207	0.0282822	-0.256463	-0.198761	0.0379036	-0.193103	-0.169904	0.346255	0.0064461	-0.271483	0.113597	0.0313557	0.117206	0.00222362	-0.470551	-0.0484362	-0.0895062	-0.31635	0.244973	-0.0516736	-0.096278	-0.311873	-0.0497493	0.0314821	0.315718	0.139978	0.53	-0.126547	-0.0633921	-0.052516	-0.0143615	0.711392	0.0794336	-0.28678	-0.118405	0.464367	0.196217	-0.0506901	-0.291926
ZP2	0.0655453	0.187029	-0.153287	0.0176564	-0.333653	0.49342	0.151181	0.0307831	-0.220889	-0.179852	0.163691	-0.139031	-0.253295	-0.173634	0.070613	-0.00669214	-0.194306	-0.0782628	-0.076092	-0.371145	0.132394	-0.14672	-0.021947	0.0994081	0.227935	0.173438	-0.238984	-0.193708	-0.0860319	-0.0890489	0.595851	-0.239784	-0.215081	-0.357098	0.0979473	0.272769	0.0683085	0.0283117	-0.401372	-0.109747	-0.0386212	0.0736931	-0.0464373	-0.096434	0.0568656	-0.199777	-0.0306438	-0.507698	-0.101017
ZP4	-0.254074	-0.0233578	0.0338693	0.503569	-0.0772011	-0.117452	-0.020563	0.776253	-0.238592	0.18657	0.0723129	-0.251261	-0.364737	-0.283862	0.0259763	0.189072	-0.0857029	0.00469344	-0.317345	0.138495	-0.145437	-0.19915	-0.145357	-0.254851	-0.209616	-0.487403	-0.313507	-0.134961	0.07234	-0.449258	-0.263452	0.014404	-0.214636	-0.0178366	-0.115129	0.190035	-0.042331	0.159379	-0.0482124	0.571692	-0.339907	0.407218	-0.318449	-0.0233578	0.0237743	-0.236154	0.154773	0.392345	0.194774
ZYX	-0.0311337	0.206928	0.269869	0.767394	-0.401077	-0.304359	0.433541	0.386832	-0.401883	0.799706	0.431027	0.49722	-0.35079	-0.772541	0.271399	0.548406	1.33634	0.787434	0.1965	1.65145	0.616956	0.754969	0.571343	0.0882115	0.620795	0.74516	-0.363093	-0.0470033	0.290996	1.28831	0.698558	0.650782	-0.0952157	0.454639	0.276911	0.192431	-0.636255	0.255648	-0.345624	1.00373	0.198448	-1.35958	-1.29428	-2.14112	-0.982209	0.374543	-0.731539	-0.242535	0.0181562
BC012193	0.0961401	-0.164835	-0.188549	0.0130887	-0.204151	-0.258423	-0.428493	-0.0100994	-0.0991811	-0.17068	0.0922314	-0.133196	-0.164295	-0.105724	-0.163025	-0.334168	-0.531066	-0.304251	-0.168248	-0.326121	-0.0204948	-0.435874	0.139942	0.0509572	-0.266039	0.0831599	-0.402802	-0.227187	0.107624	-0.20216	0.00203465	-0.279288	-0.0178905	-0.13503	0.040851	0.279159	0.462814	-0.114669	-0.281932	-0.0167089	-0.226321	-0.205179	-0.298362	-0.07187	-0.239283	-0.0599918	0.291671	-0.310451	0.256505
RP11-254F7.1	0.104539	-0.176879	-0.215636	0.0603606	-0.349609	0.210826	-0.0128548	-0.0351094	-0.105668	-0.0248444	-0.133874	-0.226354	0.0829712	0.220106	-0.0161342	-0.141931	0.0355816	0.145102	-0.0128548	-0.0968938	0.206741	-0.144295	-0.167712	0.0325196	-0.201718	-0.0561233	-0.389924	-0.123688	-0.0374563	-0.174051	-0.131423	-0.0843351	-0.0482488	-0.0366393	-0.147324	-0.183285	0.191604	-0.0165593	-0.00346724	0.143621	-0.0387381	0.177924	0.179017	-0.0663073	-0.0598979	-0.0706262	0.120445	-0.0877346	0.268537
RP4-593C16.3	0.840663	0.00690712	0.26968	-0.0904813	0.347427	-0.197828	-0.017763	-0.164818	0.166667	-0.0401956	-0.096721	-0.180203	1.01839	-0.35603	-0.131677	-0.0515978	0.0613926	0.0377311	-0.159696	0.174195	0.252841	0.260266	0.148148	-0.204084	0.0533242	0.821411	0.549829	0.017584	0.392701	1.34571	1.1893	0.2427	-0.143867	0.0135242	0.399011	-0.317482	-0.322113	0.385918	1.03498	1.13334	1.62009	-0.377054	0.749553	-0.0135845	0.115445	0.567921	-0.0802901	0.904375	-0.0833087
FSTL1	0.431943	0.412168	0.919709	-0.243394	-0.076755	-0.798247	1.38449	0.748337	0.495764	1.35547	0.688423	0.149276	-0.110403	-0.560909	0.708536	1.19453	0.705506	0.22043	-0.818905	1.03507	1.00074	-0.0782745	-0.24024	-1.39683	0.0593561	0.0795402	1.62177	-0.0702476	0.122496	-0.530303	0.0565926	-0.375545	-0.0920187	0.795183	0.0132071	0.0558846	0.232449	0.93337	1.20469	0.621207	0.428897	-1.19502	0.0633103	-0.966034	0.269133	1.39538	-0.466988	0.168159	-0.305564
FSTL4	-0.208219	-0.220562	-0.185955	0.0135074	-0.234204	0.0847449	-0.150265	0.136407	-0.391241	0.114331	-0.0174047	-0.0989578	-0.257064	0.304276	-0.114459	-0.174952	-0.263565	-0.095681	-0.29173	-0.19807	0.0703372	-0.254325	-0.14085	-0.234266	-0.101501	-0.24498	-0.225865	-0.0647434	-0.195099	-0.118825	0.195633	-0.254431	-0.121281	-0.0509052	-0.21648	-0.248117	-0.119875	-0.164551	-0.216875	0.0735714	0.0615267	0.3816	-0.0799707	-0.183131	-0.0537694	-0.166596	0.128913	-0.0407576	-0.0282824
FSTL3	0.437094	0.449601	0.501951	0.581646	-0.439143	-0.39485	1.03139	-0.633325	-0.743886	0.637084	-0.0300207	1.52953	0.0636472	-1.27266	0.328854	1.41364	1.24663	0.578153	-0.356991	1.26851	1.45997	1.15536	2.42188	-1.14649	0.441363	0.770948	-0.501447	0.11996	0.822554	0.825708	2.09743	0.446378	-0.158105	0.616273	1.32216	0.190879	-0.31266	0.769955	-0.254426	1.36812	0.238109	-0.519352	-0.854805	-1.15079	-0.434659	1.27309	-0.464749	0.193385	-0.422853
FSTL5	-0.202497	-0.3612	-0.337358	-0.391979	-0.548392	-0.470716	-0.220971	-0.443254	-0.34163	-0.548737	-0.492068	-0.396771	-0.444938	4.20122	-0.272964	1.61458	-0.397884	-0.291511	-0.343443	-0.591504	-0.46914	-0.485367	-0.402384	5.47648	-0.377512	-0.490549	-0.36353	-0.276586	-0.452659	-0.345894	-0.371347	-0.218837	-0.527035	-0.546844	-0.399329	-0.25144	-0.049016	-0.487859	-0.61002	-0.353498	-0.449382	-0.415768	-0.292504	-0.41505	-0.397806	-0.28487	0.131671	-0.426354	0.674318
OVGP1	0.321356	-0.341668	-0.512555	-0.173736	-0.558544	0.260379	0.00246946	0.586227	-0.374966	-0.184008	-0.0727674	-0.538547	-0.343177	-0.12497	-0.445678	0.178912	-0.0527256	-0.982627	0.0175993	-0.128154	0.0956436	-0.381804	-0.0263545	-0.160097	-0.0978137	0.0709094	-0.433186	-0.728606	-0.176869	0.368372	0.147501	0.135292	-0.221608	-0.168238	0.335953	-0.729275	-0.097896	-0.261471	-0.468171	0.529784	0.215782	-0.0645135	-0.330539	-0.453666	-0.713147	0.0621516	0.123111	-0.559515	0.122699
RAD54L2	0.12966	0.0278794	0.167173	0.326225	-0.332489	0.0700025	0.0252228	0.199969	-0.15364	-0.170642	-0.0971833	-0.09381	0.0331215	-0.0803699	0.126056	-0.0123328	0.232129	0.0963905	-0.262071	0.432773	0.0907127	0.0500087	0.256236	-0.311246	0.104647	0.185916	-0.102628	-0.186998	-0.111022	0.285982	0.215991	0.115234	-0.393816	0.105363	0.191154	0.0820691	-0.0926275	-0.176238	-0.429607	0.394656	0.198693	-0.00773896	-0.0193592	-0.2931	-0.101619	0.377235	0.23507	0.378185	0.108641
RPS4XP2 /// RPS4XP2	-0.0933155	-0.133053	-0.0838719	0.0702227	0.0758519	-0.250204	-0.0675777	0.398207	0.195871	-0.00171786	-0.0525233	-0.37455	-0.207927	0.866216	-0.220137	0.0274831	0.0294878	-0.410931	0.215366	-0.118876	0.0759418	-0.193954	-0.204687	0.0562649	-0.241748	-0.554764	0.237485	-0.0677504	-0.350591	-0.169689	-0.223093	-0.255783	0.153144	-0.299911	-0.38495	-0.317405	-0.363305	0.321923	0.383626	-0.157612	0.0643153	0.0638322	-0.292219	0.0754127	0.0504755	-0.385941	0.513581	-0.0107534	0.135339
CCDC144A	-0.0184844	0.075313	-0.125759	-0.0671851	-0.0727494	0.163024	-0.111648	0.155063	0.0552692	0.0868302	-0.0563017	-0.00715534	0.0284391	0.0113335	-0.0469269	0.0331002	-0.0962801	-0.12135	-0.109599	-0.0975862	0.0469989	-0.10864	0.0925388	-0.0858297	-0.129017	0.0419736	-0.022092	-0.0731414	0.0444054	0.0455604	0.0331771	0.0379038	-0.0255203	-0.221393	-0.0395133	0.00535984	0.356889	-0.0893216	-0.129341	-0.0350127	-0.0144884	-0.0651793	-0.00142877	-0.118301	0.0316727	-0.0850258	0.270718	-0.125243	0.153097
SDF2L1	-0.631943	-0.634529	-0.683586	-0.644819	-0.864535	1.02823	-0.714053	0.761679	-0.970327	0.0417058	-1.03078	0.103769	-0.459364	0.164477	-0.211183	-0.914823	0.683094	-0.895071	-0.25211	-0.118845	-0.760289	-0.54267	-0.397554	0.770244	-0.304685	0.157335	-0.391887	-0.821403	-1.71799	0.404068	-0.102266	-0.50237	0.0889012	-0.507805	-0.260435	-0.706049	0.367489	-0.502271	-0.441759	-1.06183	-0.574155	-0.702302	-1.13849	-0.670123	0.462246	-0.0685092	0.78744	-0.620455	0.937684
CCDC163P	0.0656862	-0.485192	0.0212714	-0.00932304	-0.0974282	-0.0457966	-0.0964088	0.187167	0.121345	0.233078	-0.166584	-0.444751	-0.137469	-0.341979	-0.0683123	-0.00733937	-0.427276	0.0519869	-0.567243	-0.0591262	-0.100113	-0.150167	-0.460817	-0.0858149	-0.165191	-0.35267	-0.526625	-0.207765	0.141982	-0.197681	-0.621494	-0.102042	-0.214316	-0.178843	-0.397451	-0.0372961	0.564066	0.0746732	-0.14828	-0.190296	-0.138834	0.486588	0.053551	-0.273938	0.362119	-0.762987	0.00966679	-0.111423	0.179011
IER3IP1	0.174939	0.0935625	0.127519	-0.527111	0.0791852	-0.279941	-0.186894	-0.622271	-0.0429202	0.418965	-0.0527176	0.173733	0.1366	1.50328	-0.0652691	-0.0522186	-0.374407	-0.0833202	-0.05477	-0.59008	-0.0170102	-0.207445	-0.534482	0.381444	-0.175636	-0.187053	0.387568	-0.181642	-0.74143	-0.875969	-0.75918	-0.295257	-0.138471	-0.0286379	0.121673	-0.472134	-0.155847	-0.0116213	0.3414	-0.769045	0.283831	-0.381501	0.259035	-0.320179	0.212577	-0.515547	0.0199459	0.122058	-1.09833
AC003986.5 /// BC043576	-0.181097	-0.515986	-0.436171	0.0239599	-0.0247371	-0.0513055	-0.258855	0.433236	0.0361051	-0.181678	0.385875	-0.102893	-0.365336	-0.248154	0.0293495	-0.180586	-0.160377	-0.218378	0.181489	-0.115621	0.137256	-0.0576215	0.0857269	-0.295192	0.0481737	-0.444682	-0.266605	-0.229343	0.105449	0.142369	0.121515	-0.243107	-0.261473	-0.146246	0.141387	-0.216733	0.207573	0.0186952	-0.324607	0.16841	-0.0825185	0.155385	0.146306	0.0486481	0.102069	-0.310087	-0.0389726	-0.115703	-0.338644
GATA3-AS1	-0.119633	-0.196908	-0.129433	0.0480408	-0.298434	0.249499	0.124755	0.125937	-0.221872	-0.128466	-0.0331235	-0.0258333	-0.127642	0.0123514	-0.109198	-0.075415	-0.0420066	-0.00509619	-0.0936705	0.0469026	0.0876436	-0.14596	-0.0181254	0.0841538	0.154135	-0.0316021	-0.113346	-0.115678	0.16207	0.103027	-0.335841	-0.00485235	6.3539e-05	0.0854828	0.0735138	0.0669932	0.24168	-0.0713593	-0.0353908	0.231454	0.00951952	0.206062	-0.138406	-0.234659	0.274242	-0.0577729	0.162586	-0.0501221	0.429773
OVOL1	-0.349276	-0.21209	-0.496078	-0.202038	-0.484431	0.547791	-0.30957	-0.251112	-0.628215	1.27288	-0.197282	0.0218782	-0.441477	0.303015	-0.37838	-0.306009	-0.156003	-0.54382	-0.703381	-0.618872	-0.499726	-0.197824	-0.452389	0.175911	-0.524605	-0.404922	-0.679272	-0.395979	0.0232914	-0.492389	-0.138064	-0.495891	2.04828	-0.422587	0.64336	-0.315321	0.0721841	-0.478734	-0.840852	-0.0154989	-0.343476	0.333153	-0.589035	1.58437	-0.514281	-0.490471	-0.1745	-0.51791	1.52196
OVOL3	-0.0287112	-0.204513	-0.597261	-0.0805366	-0.632498	0.262537	0.0280135	0.506773	-0.301397	-0.100308	-0.308729	-0.0977233	-0.337941	-0.158546	0.0242987	-0.217252	-0.256801	-0.206285	0.176302	0.0946757	0.3506	-0.215966	-0.48119	-0.210309	-0.499242	0.400786	-0.259428	-0.364637	0.401084	-0.0619666	0.184545	-0.0145565	-0.132337	0.0226895	0.120981	-0.140824	-0.333866	-0.0864578	-0.0519967	0.0359484	-0.00987909	-0.0557445	-0.239186	0.0236182	0.125178	0.139057	0.274371	-0.328317	0.540136
OVOL2	-0.186266	-0.125967	-0.313545	0.304956	0.242696	0.629096	-0.677538	-0.493107	0.3994	0.0129648	-0.322888	-0.384941	-0.0376173	0.0917417	-0.325656	-0.21052	-0.601078	-0.318026	0.076026	-0.196993	-0.724179	-0.358919	-0.457814	-0.405209	-0.353273	-0.496533	0.046385	-0.258387	-0.381214	0.018381	-0.824701	0.303549	-0.307919	-0.454476	-0.371845	-0.00876521	-0.509376	-0.0904383	-0.057017	-0.385233	-0.124245	0.0392283	-0.581034	0.286434	-0.517103	-0.686709	0.353669	0.0542734	0.00141897
C6orf1	-0.35855	-0.175182	-0.307893	0.201586	-0.611164	0.12631	0.0661331	0.0559011	-0.390948	0.100047	0.383297	-0.172505	-0.187389	-0.257006	0.0641179	-0.238698	0.0282282	0.142095	-0.324857	0.705486	-0.519215	-0.0837441	0.223332	0.0288553	-0.318574	0.577971	-0.264949	-0.254824	-0.304246	0.44834	0.109045	0.166208	-0.177562	0.241399	-0.258372	-0.235967	0.329528	-0.182638	-0.305771	-0.0495424	0.00110248	0.207978	-0.638606	-0.519512	-0.757126	0.340514	0.643168	-0.365003	0.718346
C1QTNF9B-AS1	0.40002	0.586404	-0.0967928	-0.08026	0.0404739	-0.426237	0.224164	0.675189	0.162964	0.24487	0.00984721	0.184097	0.072486	-0.115746	-0.0465733	0.0447904	-0.0145222	-0.37057	0.186287	0.392645	0.408846	-0.458519	0.17738	-0.0504492	-0.107469	0.159183	0.110243	0.14104	-0.347937	0.73966	-0.277543	-0.305798	-0.234369	0.228018	0.106317	0.178456	-0.597415	-0.149766	-0.0473273	0.134343	0.588939	-0.0391027	-0.269875	0.292262	0.176091	0.0281246	1.17911	-0.0952319	-0.356596
RP3-333B15.4	0.214679	-0.595475	-0.0457369	-0.261968	-0.627737	0.0678437	-0.0856991	0.335242	-0.133522	0.309865	0.0505165	-0.383249	-0.0342269	-0.0589544	-0.364762	-0.168626	0.176207	-0.364441	-0.166811	-0.02178	0.535258	-0.288527	-0.132273	-0.298808	-0.335035	0.358467	-0.19519	-0.19519	-0.166187	-0.157581	-0.102113	-0.285154	-0.0615174	-0.23047	-0.0571454	-0.46226	0.214872	-0.119515	-0.269669	0.212345	-0.0206691	0.0103176	-0.184942	0.213729	0.0158756	-0.159571	0.263604	0.127928	0.0277857
SCGB3A2	2.1452	2.50133	2.377	2.23649	2.8703	1.08953	2.17009	2.71409	2.83976	0.733849	2.88472	2.84648	2.36294	-6.34188	2.70181	2.07961	2.37843	2.1018	2.30759	2.13228	1.7483	2.78535	0.296239	-6.60942	1.88213	1.65006	1.98418	1.58768	-0.351424	3.30011	2.52822	3.29053	-0.122382	1.68923	2.88378	-0.00455955	-6.65354	2.09498	0.713267	1.85897	2.61674	-5.96344	3.28697	-6.73776	0.795327	1.6043	-0.504777	2.73193	-6.26224
SCGB3A1	3.25211	1.9283	1.00743	2.65683	2.02877	-0.14882	1.54421	3.68071	3.53697	0.311794	-0.956967	3.21308	1.70532	-2.05635	0.371461	3.10996	2.34626	1.68211	0.908792	2.90659	3.8138	2.04181	-0.308131	-4.47232	2.60729	-0.316313	0.192714	1.82656	-0.500554	2.85506	-0.0239069	3.22643	0.0606603	1.33424	3.14461	3.70076	-4.69371	3.23103	0.586035	3.18759	2.43805	-4.29164	0.265426	-0.504783	0.461577	0.0701479	-2.09162	0.466636	-0.304795
SCGB2A1	2.03691	-1.12519	0.103215	1.46113	0.571079	0.438754	-1.18388	-1.01876	3.60156	-1.3864	-0.129235	1.24161	1.86091	-1.24401	-1.16283	1.73806	0.893517	-0.126461	-0.395501	-0.24684	1.65357	-0.951438	-0.635509	-1.09569	1.28109	-1.4907	-0.916526	1.55973	-1.40965	0.996039	-0.405061	2.25314	0.24565	0.499611	0.910665	3.45291	-1.40577	0.893517	-0.369408	-0.601358	0.667335	-1.18986	-0.446997	-1.11371	-0.944421	-0.613657	-1.3439	0.00265979	-1.03937
SCGB2A2	0.156624	0.00218778	-0.215698	-0.102508	-0.217907	-0.0657703	-0.0213922	-0.048382	-0.169211	0.0176385	-0.0351667	-0.159471	-0.172001	-0.0991051	0.0415278	-0.0466334	0.0464698	-0.110969	0.000862	-0.101465	0.0699349	-0.0969934	0.029409	-0.0461551	-0.147085	-0.122198	0.177075	-0.108046	0.0623696	0.127439	0.190022	-0.111392	0.00293512	-0.0969934	0.0290407	-0.0841531	0.0397823	-0.123384	-0.00613033	-0.172829	0.0809716	0.0466607	0.0167584	-0.115921	-0.197316	-0.0301126	-0.029519	-0.0846208	-0.0639592
[truncated: 22,689 more rows]
[truncated: 45 more columns]
