# Supplementary material for: Identification of key genes associated with progression and prognosis for lung squamous cell carcinoma
Source: PeerJ. 2020 May 6;8:e9086. doi: 10.7717/peerj.9086 (PMC7210810; doi:10.7717/peerj.9086)
Supplement: Supplemental Information 3 [file peerj-08-9086-s003.xlsx]

## Sheet: GSE33532
1:HISTOLOGY	Normal	Normal	Normal	Normal	Normal	Normal	Normal	Normal	Normal	LUSC	LUSC	LUSC	LUSC	Normal	Normal	LUSC	LUSC	LUSC	LUSC	Normal	Normal	Normal	Normal	Normal	Normal	LUSC	LUSC	LUSC	LUSC	Normal	LUSC	LUSC	LUSC	LUSC	Normal	Normal
DATA	GSM835272	GSM835277	GSM835282	GSM835287	GSM835292	GSM835297	GSM835302	GSM835307	GSM835312	GSM835313	GSM835314	GSM835315	GSM835316	GSM835317	GSM835322	GSM835323	GSM835324	GSM835325	GSM835326	GSM835327	GSM835332	GSM835337	GSM835342	GSM835347	GSM835352	GSM835353	GSM835354	GSM835355	GSM835356	GSM835357	GSM835358	GSM835359	GSM835360	GSM835361	GSM835362	GSM835367
DHDH	5.16105	5.38178	4.95701	4.94502	5.59027	5.35051	4.91025	5.51864	5.09116	5.4096	5.15255	4.72061	4.81021	4.96644	5.54116	4.97382	4.78617	5.08445	4.96057	4.84933	5.70636	5.08749	4.46101	5.68931	4.85797	5.1617	5.09242	5.47167	4.77268	4.96601	4.79264	4.88764	5.14042	4.85095	5.30955	5.13921
T	5.17919	5.04805	4.89806	5.12969	5.44229	5.09583	5.03459	5.40093	5.25313	5.27827	5.31516	5.18882	5.21628	5.20373	5.30006	5.4025	5.53796	5.2686	5.37614	5.16098	5.23	5.26655	5.27572	5.14015	5.22589	5.49156	5.31296	5.32444	5.47701	5.36046	5.2275	5.20326	5.26854	5.52103	5.47971	5.2509
DHFR	5.89323	5.4797	5.89074	5.94294	5.70773	5.51077	5.88938	5.79954	5.87123	6.79459	6.39668	6.6486	6.64663	5.75541	5.49494	6.38444	6.14646	6.21497	6.20331	5.8098	6.05294	5.87536	5.58713	5.66733	5.535	6.93523	7.06955	7.14512	6.29566	5.50087	7.33636	6.91185	7.2711	6.54085	5.57959	5.92715
DHPS	7.57919	8.03711	7.71431	7.75626	7.47038	7.6327	7.48564	7.6479	7.75478	7.71815	7.52268	7.4224	7.26256	7.59486	7.69598	7.40739	7.36636	7.37125	7.33917	7.55128	7.33046	7.61516	7.7906	7.76039	7.69407	7.71961	7.65572	7.58414	7.57908	7.52205	7.88061	7.73614	7.8548	7.98542	7.53494	7.63939
DHX8	6.96236	7.04545	7.06735	7.05793	6.92683	7.04889	7.06681	7.12333	7.03608	7.25427	6.96506	7.2567	7.25831	7.22815	7.0008	6.99677	7.0138	6.9692	7.20052	6.974	7.02463	6.92332	7.1277	7.01042	7.03835	7.39643	7.17776	7.10192	6.99718	6.99745	7.74062	7.52812	7.75453	7.4716	6.91839	7.07787
DHX9	5.5073	5.37102	5.8869	6.0103	5.29308	4.92617	6.07707	4.6999	5.85934	6.17253	5.7041	6.00981	5.39188	6.29994	5.70473	5.43378	5.54831	5.75341	5.4701	6.4292	5.55419	6.07689	5.27439	5.90825	5.8599	6.6267	6.3969	6.18972	6.03547	5.5903	6.49812	6.23626	6.69696	6.20758	5.68656	5.45679
OR7E47P	7.82129	8.92433	7.5438	7.72949	8.06614	8.10936	8.60717	8.06269	8.34081	6.40581	6.3217	6.31101	6.30989	8.41992	8.27764	6.13471	6.514	6.34568	6.33798	8.4061	7.71912	8.45192	8.27632	7.78664	8.35137	5.69634	5.84501	5.70567	6.60119	8.71645	6.03279	5.90594	6.01745	5.72095	8.2043	8.07365
PPIP5K1	5.3979	5.57875	5.75196	5.57187	5.3549	5.60151	5.59291	5.32452	5.64001	5.7761	5.52469	5.67012	5.49961	5.60505	5.44848	5.61688	5.37613	5.80128	5.66378	5.68137	5.36049	5.57225	5.58501	5.82281	5.6648	5.47798	5.41827	5.61975	5.28141	5.74886	5.82131	5.78081	5.90617	5.91104	5.45201	5.4558
PPIP5K2	7.76818	7.27049	7.74308	7.62352	7.4979	7.63395	7.56754	7.79132	7.63446	7.11799	7.71291	7.23254	7.38343	7.56952	7.74446	7.47038	7.76351	7.72197	7.62003	7.6957	7.757	7.6755	7.63532	7.78198	7.62953	6.87138	7.45118	7.29912	6.40441	7.90028	7.47372	7.67191	7.60377	7.33668	7.75086	7.51407
DHDDS	6.34868	6.77541	6.43926	6.51914	6.29522	6.51149	6.662	6.66068	6.58182	6.70093	6.59531	6.60583	6.55042	6.58047	6.67771	6.88067	6.64955	6.77522	6.71586	6.3974	6.71098	6.59933	6.39952	6.69237	6.48277	6.4252	6.5963	6.82273	6.58877	6.59945	6.76332	6.61001	6.6687	6.63805	6.47049	6.50398
DIO2	4.57309	4.54687	4.85673	4.37723	4.71809	4.20829	4.79902	4.72696	4.38102	6.30147	6.16601	8.02115	7.47854	5.06829	4.14305	6.41499	5.38206	7.16027	6.23684	4.31645	5.3892	4.35965	4.04293	4.0124	4.27667	5.79124	5.59315	5.88298	6.16648	4.55587	4.81328	5.27231	5.33384	5.71584	4.36875	4.97703
DIO3	5.03168	5.23563	4.6825	4.9306	4.96922	5.02986	4.80844	4.93704	4.73843	4.79588	4.75767	4.7824	5.00481	4.8494	5.24687	4.90965	5.1148	4.88806	4.80232	5.07093	4.94426	5.0544	5.3247	4.75155	4.76333	4.8535	5.12031	5.04315	5.25636	5.26309	4.94698	4.9144	4.73948	4.63906	5.15766	4.79617
OSCP1	6.09884	7.87212	6.86788	6.26406	6.14523	5.93613	5.66206	6.47112	6.01656	4.48441	5.55645	4.29661	4.11873	6.44372	6.52086	5.75895	6.27388	5.90526	5.62918	5.94787	6.07259	5.80761	6.30624	6.06068	6.34814	3.77119	4.09872	4.43733	4.55368	6.67948	5.7761	5.72859	5.83246	5.67686	6.90058	6.60606
DIS3	6.58982	6.23805	6.5655	6.61526	6.51422	6.50492	6.56544	6.51743	6.67899	6.51887	6.38652	6.58702	6.4149	6.58169	6.36078	5.86524	6.05176	5.79705	6.01451	6.72597	6.26831	6.62172	6.73297	6.46014	6.47949	6.36016	6.185	6.05836	6.04855	6.62944	6.66929	6.53758	6.6653	6.5096	6.64186	6.31445
DDI2 /// RSC1A1	6.59815	5.78621	6.64388	7.12321	5.73803	6.11454	6.6501	6.24393	6.97854	6.63425	6.6247	6.80925	6.91104	6.49777	6.73725	6.29298	6.6302	6.83323	6.76494	6.8728	6.3217	7.07872	6.80403	7.0982	6.85917	6.83648	6.91005	7.15909	6.55471	7.16847	6.73585	6.70866	6.76907	6.46887	6.22262	6.49392
NPC1L1	4.62681	4.94187	4.45614	4.89943	5.04926	4.73871	4.69427	4.91895	4.49733	4.84103	4.80273	4.75322	4.8145	4.82731	4.64798	5.03626	4.95952	5.21855	5.01171	4.71132	4.64139	4.56236	4.8097	4.75624	4.68373	5.03374	4.7287	4.91042	5.154	4.58327	4.9651	4.94516	4.76213	4.89326	4.84062	4.51061
ITGB6 /// LOC100505984	6.37059	6.33035	6.07801	6.03809	6.79739	5.97519	6.24032	5.88863	6.33665	5.35449	6.48971	3.93429	3.95858	6.24922	6.53547	6.19217	6.14323	5.35269	5.75806	6.47653	6.42326	6.72687	5.71518	6.16735	6.02116	4.29626	4.1751	4.119	4.40311	5.67736	4.48468	4.64223	4.51936	6.12068	5.40574	5.6919
AR	5.4411	5.28379	6.16698	5.68077	5.3898	5.24344	5.93908	4.85417	5.73088	4.74565	5.11214	4.81767	4.78074	5.56162	5.28915	4.67449	4.88367	4.66392	4.83847	5.64486	5.52556	6.04574	6.17747	5.53358	5.69004	4.13651	4.39483	4.29636	4.28872	5.68567	4.7223	4.40661	4.40525	4.67161	5.40032	5.23459
C2	6.74824	7.54921	6.42423	6.86102	6.47219	7.52052	6.78403	7.35656	6.99979	6.85695	7.11166	6.65667	6.69216	7.02007	7.50532	5.81607	5.96651	5.64724	5.73136	7.2256	7.1836	7.69489	6.55313	7.65753	7.3448	5.76445	6.09818	6.03519	6.05448	6.69645	5.40981	5.96848	5.54897	5.39993	6.49099	6.87779
C3	11.9804	11.7308	11.3837	11.4444	11.3651	11.8876	11.6455	11.7093	11.3702	10.7678	12.0003	10.606	11.0393	11.5721	11.7583	10.702	11.7591	10.0747	10.9603	11.4915	12.331	11.8727	11.0868	11.7639	11.8084	9.094	10.1322	10.4004	10.2022	12.0425	9.46915	10.5979	9.66184	9.06424	12.1697	11.6983
C5	7.77728	7.04293	7.45199	6.26276	6.20598	7.28108	6.79292	7.07838	7.07505	5.28047	6.88864	5.04594	4.93244	5.83017	7.04285	4.81616	6.28251	4.43583	4.93594	6.8584	7.69356	7.0287	7.26047	7.18018	6.84632	5.44612	5.53491	5.0911	4.82333	6.72739	3.97126	4.48609	4.04468	3.84674	7.02761	6.69194
C6	5.42166	7.95626	7.06682	5.57568	5.68131	4.96442	4.70806	6.19394	4.31295	4.34383	5.05917	4.36836	4.11201	6.56136	5.89004	4.40192	5.13179	4.31485	4.25039	5.20164	5.77503	4.82139	5.42575	6.38329	5.92633	4.07834	4.26956	4.39541	4.58752	6.90976	4.02714	4.62845	3.97693	3.93201	7.64986	6.71106
C7	8.67786	7.7097	8.17136	7.90718	7.42877	8.56403	8.01504	7.48081	7.95018	6.22806	8.33475	4.79854	5.23516	8.51603	7.83298	5.82169	6.76534	5.39536	5.81591	7.285	9.3721	8.79342	8.26807	7.62065	7.761	4.05863	5.26527	4.49045	4.99272	8.70865	5.77804	6.60189	5.57345	4.74648	8.03124	8.92581
CP	5.36749	7.60237	6.12691	5.10011	5.57712	5.48568	4.60837	6.43324	4.33291	8.26581	7.60678	6.05892	5.67801	6.07011	6.38454	7.34371	8.26771	6.76489	7.17983	5.0826	6.21321	3.79956	4.35272	6.29144	5.7318	7.54766	7.10864	6.18495	8.28639	6.61648	9.08448	9.10441	8.96133	9.4352	7.17463	6.28411
CS	9.54666	9.61773	9.45706	9.54111	9.48676	9.60372	9.78017	9.90674	9.45424	9.98596	9.92683	10.0065	10.1418	9.55867	9.83074	9.96924	9.85982	9.81926	10.0239	9.83851	9.5777	9.72538	9.62611	10.221	9.77913	10.1069	10.1135	10.3308	9.86074	9.6037	10.2602	10.0446	10.3504	9.94393	9.39904	9.62827
F2	4.57534	4.39816	4.02957	4.49001	4.73565	4.53295	4.6842	4.76957	4.2788	4.48018	4.64692	4.73991	4.74029	4.53293	4.63674	5.00081	4.63244	4.93016	4.8584	4.28099	4.54907	4.31846	4.27079	4.3911	4.40907	5.10821	5.09078	5.14056	5.50516	4.53603	5.00574	4.9918	4.73094	4.92333	4.44305	4.48954
F3	9.94148	8.30252	8.27358	8.62481	10.2463	9.71341	9.04166	8.31337	8.58403	8.3217	8.84021	8.02554	7.96356	8.89414	9.65991	9.81462	9.49267	9.82083	9.6356	9.05106	9.28573	8.91289	8.87615	8.34607	9.46307	7.64277	8.2269	8.12994	7.61452	8.31264	10.1124	9.81138	9.94574	9.51249	9.41582	8.65239
F5	5.20929	5.24419	5.18686	4.85569	5.89703	5.46732	4.75447	5.32086	4.46879	5.82097	6.04335	5.29955	5.41885	5.8526	4.14263	5.16777	5.51486	4.62282	4.94267	4.61106	4.84784	4.47087	4.23635	4.55975	4.46093	4.82612	5.46896	5.22639	5.82588	4.48018	4.44579	5.08718	4.78224	5.59887	5.27243	5.19314
F7	4.95902	4.89919	4.77665	4.97899	5.06319	4.85952	4.46228	5.21573	4.78813	5.00411	5.31212	5.51537	5.48637	4.88873	4.90799	5.54875	5.35398	5.54508	5.23464	5.00815	4.99435	4.79981	4.90958	5.02133	4.99488	5.59247	5.60273	5.65116	6.11605	5.02001	5.20474	5.31407	5.34088	5.25181	5.07072	4.81509
F8	8.8204	8.91443	8.92935	8.78674	7.9035	7.81121	6.72253	8.57518	7.79024	7.22426	6.9856	6.63983	6.70815	8.72031	7.52517	5.9631	6.41574	5.3991	6.05737	9.62101	7.51993	7.37236	8.32773	7.5917	7.66332	5.49392	6.03543	6.10958	5.32602	9.2886	5.64883	6.43939	5.80027	5.37091	9.73057	7.7282
FH	7.045	7.51315	7.38402	7.41347	7.29656	7.33954	7.37232	7.30211	7.53947	8.16725	7.64319	8.03701	7.73984	7.39168	7.43857	8.01891	7.77103	7.8503	8.00679	7.5404	7.44758	7.35287	7.23506	7.46791	7.30312	8.32475	7.92753	7.99977	8.2576	7.20998	8.0519	7.70019	8.05629	7.38979	7.17003	7.20975
GK	6.17988	5.94521	5.96523	5.74	6.83903	6.67514	6.03278	6.5168	6.16545	5.99607	6.07117	5.75487	5.75315	6.45942	6.43693	5.91766	6.14619	5.70182	5.90132	5.93292	5.76359	5.74693	5.57845	6.34774	5.76852	5.77843	5.94736	6.06514	5.58877	5.60252	6.0325	5.95283	6.34804	5.3777	6.57245	6.08788
HR	4.85397	5.27449	4.78532	5.23244	5.32424	5.52775	5.06893	5.3346	5.08181	6.01524	5.7323	5.73705	6.19439	5.2393	5.13426	5.68843	5.719	5.86292	5.68854	4.83727	5.36064	5.10602	5.05588	4.9964	4.92742	6.18677	5.91153	6.07371	6.35829	5.08412	5.25423	5.18834	4.99098	5.2635	5.27772	5.19597
IK	8.76079	9.23758	9.16609	8.96016	8.89707	8.72552	8.57947	8.83152	8.90431	8.52756	8.65228	8.63301	8.37176	8.94712	8.77763	8.62496	8.64599	8.54419	8.44732	8.91052	8.6794	8.77074	9.0232	8.71199	8.9901	8.3117	8.27017	8.12701	8.05377	9.22225	8.50539	8.48924	8.49611	8.33456	9.16547	8.80914
KL	6.53574	5.7419	6.40923	6.95543	5.26449	5.18053	6.1804	5.39748	6.54885	3.01852	3.92508	2.69708	2.97751	5.29924	6.325	3.28404	3.71025	3.11646	3.54718	6.53888	6.03873	6.15087	6.85102	5.74513	5.99101	2.78567	2.94181	3.06309	2.90286	4.68826	3.47496	3.44461	3.37469	2.96495	5.89458	5.17624
KY	4.87023	4.99792	4.70936	4.72551	5.10481	4.92033	4.92235	5.46444	4.72135	5.33677	5.60204	5.72129	5.71216	4.79469	5.11626	5.69388	5.49957	5.6861	5.34201	4.86033	4.98153	4.98961	4.78105	5.00811	5.04302	5.64703	5.57094	5.73557	5.95316	4.92125	5.42886	5.54273	5.41037	5.42664	5.03301	4.97014
MB	4.19271	6.32899	4.61337	4.32745	4.72884	4.14977	4.37356	5.17451	4.1585	4.54033	4.90325	5.05284	5.21113	4.27663	4.46421	4.72634	5.8747	4.60478	4.80796	3.88047	4.49295	4.04256	4.11157	4.58664	4.78235	5.06743	4.95835	5.23645	5.27293	5.19512	4.66772	4.2708	4.1769	4.20776	5.30964	5.241
PC	5.11766	5.57587	4.9438	5.00384	5.09813	5.92319	5.14857	6.14932	5.09569	7.31885	6.13911	6.74435	6.7017	5.28081	5.71892	7.80535	7.29488	7.82803	7.97291	4.98735	5.8324	5.12953	5.22874	5.7345	5.29947	6.02877	6.08426	6.57527	5.87412	5.39608	6.33817	6.19354	6.17829	6.08206	5.14862	5.44161
TXNDC11	8.42529	8.44255	8.44525	8.42688	8.0786	8.66628	8.46639	8.52718	8.57523	7.84804	8.61038	8.22319	8.51534	8.40572	8.86954	8.33074	8.47471	8.29719	8.46579	8.55718	8.10348	8.57842	8.34028	8.46428	8.77587	8.21721	8.64682	8.48734	9.08402	8.41752	7.27533	7.78398	7.64217	7.29377	8.05516	8.36208
TXNDC12	9.48085	10.0526	9.63436	9.51893	9.47814	9.77643	9.40295	9.98968	9.72443	9.863	9.82464	9.84989	9.7863	9.62032	9.72429	10.1137	9.9703	10.1435	10.2407	9.46398	9.84214	9.65133	9.75468	9.82665	9.57284	9.94408	10.087	10.1437	9.82534	9.509	10.0497	9.97528	10.0426	9.94912	9.65125	9.40883
TXNDC15	7.61068	7.78573	7.57328	7.46746	7.30744	7.49134	7.68082	7.8396	7.77022	7.53472	8.17095	8.05023	8.36903	7.72898	7.71455	7.97749	7.98958	8.0668	7.94224	7.75016	7.89235	7.74486	7.65246	7.73349	7.63496	7.53624	7.96973	7.76821	8.40742	7.53633	6.9217	7.46885	7.34794	7.10968	7.52108	7.76334
TXNDC16	7.03258	6.60746	6.74404	6.85449	6.89018	6.72916	6.62739	6.51338	6.80787	7.36755	6.64782	7.16519	7.03005	6.54601	6.68096	5.63751	5.75653	6.05186	5.84476	6.35529	6.67838	6.42906	7.30051	6.41744	6.62335	6.05043	6.1322	5.97202	6.08852	6.93361	5.63288	5.7517	5.81179	5.44544	6.82115	6.4247
TXNDC17	7.29815	7.56922	7.23721	7.04043	7.02771	7.28263	7.18186	7.17201	7.2813	7.92892	7.31707	7.51562	7.26507	7.07291	7.29057	8.09736	7.92806	7.87553	8.10443	7.11244	7.4329	7.26781	6.90993	6.79151	6.95511	7.4958	7.60966	7.97635	7.05603	6.85961	8.95164	8.7963	8.88896	9.1322	7.04586	7.27641
OSGEP	6.81267	7.38929	7.20784	6.77493	6.59175	6.93233	6.95506	6.95689	7.23944	7.43234	6.98867	7.00088	6.7282	7.05901	6.75343	6.58795	6.55664	6.38118	6.62487	7.12363	6.89211	7.13588	6.96189	6.86007	7.09478	6.82855	6.57303	6.50233	6.80838	7.34082	7.24532	6.96309	7.22828	6.98614	6.66206	6.86941
TF	4.14396	5.28692	4.31266	4.32891	4.30721	3.876	3.83173	4.70214	4.106	5.35982	3.85394	3.60651	3.60889	4.06319	3.87665	3.97174	3.71036	4.13578	3.90468	4.05414	4.16217	4.02712	4.22237	3.89003	3.9271	5.46897	5.21971	4.76246	5.64541	5.61988	8.53493	6.10893	6.92167	5.63232	6.50253	4.03803
HYAL1	8.24639	8.66507	8.60244	8.88423	8.13958	8.74027	8.22145	8.64206	8.84606	6.46781	6.94865	5.6113	5.85564	8.25698	8.88713	5.52051	6.02722	5.21238	5.94987	8.58246	7.31861	8.92715	8.66153	8.32544	8.53601	4.69569	4.93327	5.27051	5.98912	8.01089	5.6384	5.9886	5.67117	5.00176	7.59704	8.62193
HYAL2	8.93194	9.36407	9.13271	10.0049	9.33248	8.94509	9.4992	9.31044	9.52747	8.32842	8.74871	7.96092	8.15434	9.29387	9.98173	8.75739	8.80219	8.44573	8.56937	10.4323	8.95464	9.79796	9.69367	9.61318	9.83176	7.74097	7.88511	8.02465	8.05152	9.01032	8.5712	8.55721	8.541	8.40109	9.30819	9.3199
ALS2CL	7.46524	7.06081	7.64484	7.61886	7.31998	7.09915	7.21693	7.30058	7.34941	5.81673	6.238	5.73391	5.72377	6.99697	7.3147	6.42915	6.35675	6.84036	6.69619	7.6762	6.66599	7.48685	7.85251	7.57043	7.63744	6.12663	5.56992	5.57726	5.8361	7.51388	5.94563	5.97088	5.99853	6.14974	7.01712	7.40677
RPL21 /// RPL21P28 /// SNORA27 /// SNORD102	12.701	12.7579	12.6931	12.6582	12.5511	12.6565	12.5986	12.6973	12.6715	12.4626	12.7606	12.4588	12.5278	12.6365	12.6121	12.3836	12.631	12.2998	12.3861	12.746	12.7429	12.7102	12.7485	12.6319	12.6593	12.5509	12.5783	12.4638	12.5746	12.7632	12.2781	12.4215	12.3583	12.3623	12.7372	12.6703
XG	3.75882	3.49744	3.9942	3.82477	3.6828	3.13144	3.90864	3.60117	3.92647	6.8579	4.2027	6.77249	6.47148	3.234	3.2274	6.53878	4.81538	6.12379	6.58541	3.38934	3.42739	4.47352	2.99199	3.13524	3.45014	5.60687	5.80468	6.3248	3.84125	3.31458	3.18389	3.23838	3.12613	3.13906	3.35105	4.10579
XK	4.67112	5.21156	5.23376	5.05305	4.1634	4.73284	4.27662	4.64443	5.34337	2.83166	3.52812	3.03759	3.56039	4.71454	4.84643	3.4324	3.75026	3.78052	4.18218	5.4053	3.69139	4.34794	5.69679	4.74046	5.20354	3.51023	4.09058	4.13417	3.11029	5.39514	3.30465	3.02892	2.92291	2.67183	4.96997	4.67629
DKK1	4.91443	5.77888	5.22538	4.61224	4.68505	5.80143	3.78378	5.9475	5.1059	7.25179	6.72269	7.70378	6.54599	5.92078	4.38036	6.54023	7.54447	7.63625	7.63001	5.08315	4.43042	4.91557	4.16227	4.90379	4.16421	5.70292	5.12222	4.56103	6.50781	3.54062	7.46555	7.27592	7.82997	7.3587	5.41283	4.4652
DKK2	5.84516	6.60489	6.87885	6.79954	6.68619	5.37716	4.80382	6.29062	7.66987	5.40969	7.07251	4.84867	4.69409	6.53642	6.13081	4.96817	5.75374	4.03213	4.69473	6.83149	5.96801	6.50118	7.17238	5.932	5.05639	2.76026	4.30198	3.96604	3.60208	4.59045	4.57015	5.78019	5.23017	3.27854	5.07836	5.55694
DKK3	6.7375	6.83201	6.84941	6.81259	7.02337	6.83855	7.69982	6.80419	7.27223	6.73183	6.07956	6.87367	6.81083	7.04644	6.3951	7.27703	6.46909	7.41548	6.73419	7.2249	6.60011	7.05544	7.21618	6.86457	6.67541	5.09163	5.29472	5.38325	5.77573	6.60188	5.15104	5.4078	4.95762	5.59173	6.78985	6.90956
OSER1	7.05041	7.39745	7.0955	6.9761	7.1227	7.232	6.78778	6.97475	7.14136	7.00885	6.95488	7.27602	7.14178	7.04286	6.86835	6.96354	6.87072	6.95691	7.06415	6.97696	6.76408	6.95455	7.18832	7.08528	6.89933	7.17361	6.99285	6.71933	7.04322	6.94912	7.06615	7.02818	7.05283	7.10165	7.01545	6.85246
HIATL1	8.13767	8.80522	8.49974	8.61931	8.50057	8.74498	8.69443	8.77704	8.8923	9.049	8.76621	9.06888	8.80911	8.4486	8.55522	8.47028	8.62816	8.38501	8.29125	8.53757	8.49136	8.88025	8.59831	8.94168	8.65435	9.21303	9.02545	8.82998	8.97195	8.20129	8.11232	8.22617	8.18648	7.9723	8.33675	8.40417
HIATL2	5.93656	6.39893	6.14276	6.24767	6.03746	6.31966	6.33197	6.28909	6.41382	6.80268	6.37898	6.86245	6.27319	6.52954	6.15058	5.72287	5.88971	5.82452	5.84376	6.48053	6.29713	6.41245	6.23535	6.46862	6.31093	6.68849	6.40164	6.37268	6.61932	6.27709	7.08414	6.82377	7.03502	7.05286	6.11564	6.48355
GNPNAT1	6.83523	7.1146	6.79199	6.36868	7.82914	6.779	6.98068	7.10459	6.85344	7.75301	7.3171	7.77588	7.90678	6.80563	6.73587	7.54253	7.6615	7.41816	7.91417	7.09952	7.28905	6.76525	6.79108	6.88478	6.58692	7.90651	7.56988	7.3621	7.78707	6.64864	7.5545	7.47868	7.506	7.62681	6.9032	6.62472
DLAT	5.95486	6.38591	6.20722	6.34462	5.79607	6.32767	6.23715	6.48573	6.35488	7.19979	6.50154	6.95916	6.65716	6.49744	6.20634	7.64409	7.25375	7.56023	7.84467	6.33373	6.37018	6.42353	6.38867	6.68093	6.28322	6.49279	6.38092	6.52886	6.07431	5.93581	8.15915	7.91948	8.31987	7.85763	6.02245	5.84465
DLC1	11.0322	9.13789	10.3357	10.4698	10.6931	10.6546	10.8271	9.74856	10.7174	7.64408	8.86819	7.33128	7.1456	10.5505	10.7317	7.33573	8.12323	7.08658	7.69265	10.4711	9.56994	10.5395	10.5113	9.9692	10.8177	6.03864	6.31211	6.01094	6.60065	10.1546	6.82334	7.55814	6.78093	6.63335	10.8606	10.1333
DLG1	5.47927	4.41215	6.01537	5.83135	4.64412	5.41585	5.36152	4.30707	5.64652	5.70309	4.86917	5.34918	4.66084	5.42157	5.18458	6.63237	5.99623	6.84205	6.65317	5.94166	5.03263	5.55891	5.51404	5.56765	5.75359	7.15501	6.95794	7.34827	6.28896	6.12604	6.33952	6.26388	6.36171	6.6389	5.31394	5.48596
DLG2	4.6692	4.46209	4.32698	4.26971	4.21308	4.22657	4.58105	3.94116	4.04847	3.874	5.35656	4.39194	4.65461	4.17814	3.85892	4.3153	4.70679	3.92512	4.32034	4.13744	6.08262	3.91296	4.34839	4.30378	3.9644	3.81097	4.04947	3.85912	4.06598	4.35048	3.68293	4.05627	3.53611	3.5722	4.36447	4.48785
DLG3	5.85141	5.76769	5.80982	5.81952	5.66173	5.70398	5.89752	5.801	5.75895	5.9055	5.70538	5.94136	5.86498	5.71624	5.82824	5.70055	5.72002	5.63465	5.66566	5.83865	5.64611	5.71443	5.59717	5.8432	5.91544	6.29351	6.2093	6.38487	5.93656	5.88707	6.24252	6.17106	6.26621	5.9648	5.61111	5.84526
DLG5	6.69577	5.96783	6.30593	6.76539	6.15381	6.12211	6.22183	5.90626	6.37821	6.87964	6.07382	6.71243	6.53274	6.13893	6.13001	6.67748	6.47672	6.86674	6.73809	6.59864	6.22592	6.26898	6.4965	6.12166	6.57201	7.27832	7.04257	7.02513	7.07017	6.89199	6.54444	6.41853	6.50699	6.71439	6.67833	6.25332
CYP2B6 /// CYP2B7P	11.0729	10.3657	11.2268	10.5578	11.8193	11.3106	10.0508	9.91493	10.5162	6.41671	8.66369	4.21417	4.30771	10.7634	10.8591	6.00425	7.98454	5.18336	6.69512	10.3042	8.9725	10.4411	10.8751	10.5573	10.543	3.90858	4.60699	4.19663	4.51944	10.1032	6.07293	6.36838	5.90342	4.88235	10.69	10.2296
DLL1	7.82865	6.7564	7.03552	7.04022	6.21185	6.49373	7.07076	6.45164	6.70058	5.95059	6.13106	6.4408	6.42217	6.6133	6.5536	7.52492	6.81217	7.64138	7.56354	6.85486	7.5571	7.26987	6.94708	6.28381	7.41797	4.46603	4.75376	4.90287	4.63799	7.77414	4.78288	5.27327	4.71702	4.89504	7.17595	6.91126
DLL3	4.03485	4.17096	3.96471	3.90123	4.01722	4.16012	4.03647	4.19089	3.77328	4.8321	4.32841	4.53515	4.5302	4.03867	4.09939	4.56573	4.46331	4.6017	4.4392	3.95935	4.11158	4.00918	4.00374	4.02474	4.05107	5.15355	4.76831	4.6517	5.38029	4.21383	4.33117	4.51566	4.55211	4.73055	4.06859	4.11407
DLL4	7.85804	6.39827	6.37278	6.86333	6.73561	6.52341	7.65729	6.31098	7.24823	5.99158	6.29878	5.89358	6.00097	6.54193	6.80741	6.53461	6.3553	6.23961	6.54644	6.07787	7.69209	6.63164	7.16385	6.19511	6.6694	6.11025	5.94596	6.1084	6.71205	6.11057	6.58599	6.49152	6.28073	6.07596	6.53039	6.20808
DLK1	3.00923	3.36087	3.05607	3.2153	3.26128	4.15203	3.23353	3.36833	3.32893	3.48109	3.45624	3.58179	3.66709	2.88971	3.46469	3.40206	3.26056	3.25705	3.51144	3.86547	3.33269	3.11238	3.14458	3.27895	3.26529	3.35353	3.32661	3.41489	3.49826	3.20973	3.75928	3.60046	3.35451	3.47849	4.42182	3.32088
DLK2	5.16987	6.03669	5.54882	5.27758	5.72891	5.29995	5.52086	5.63703	5.19241	8.29054	6.97435	8.11157	7.94657	5.56259	5.30091	6.74286	6.25883	7.00091	6.61325	5.23794	5.40509	5.10868	5.2387	5.43601	5.83404	6.85643	6.72734	6.91017	6.79964	5.38757	8.61558	8.544	8.58532	8.84545	5.62529	5.64544
P4HTM	8.59654	9.28832	8.96536	8.51153	8.53528	8.58641	8.31786	8.71857	8.65438	7.9176	8.23016	7.96533	8.2461	8.50926	8.54183	7.75114	8.16675	8.00453	7.94384	8.2953	8.36243	8.42096	8.52335	8.28568	8.68736	7.21784	7.47944	7.12905	7.85475	8.66967	8.01183	7.96759	8.03279	7.90949	8.70586	8.7892
DLX2	5.08992	4.97797	4.78334	4.69773	5.00501	5.02734	5.05472	5.35355	4.7761	5.07291	5.26407	5.23954	5.43353	4.71859	4.86823	5.36404	5.30017	5.3735	5.37192	4.99619	4.79209	4.83121	4.99811	4.87586	4.58203	5.19657	5.68805	5.54683	5.52276	4.77676	5.26851	5.38462	5.15093	5.32761	4.9536	5.16384
DLX5	3.84264	3.77746	3.68454	3.78658	3.91477	3.86158	4.33577	3.85564	3.6687	5.56728	4.92026	6.27026	6.41365	3.87288	4.13569	6.12752	5.46738	6.47188	6.23547	3.51516	4.15254	3.8497	3.8207	3.83574	3.88556	6.31743	6.43521	6.37973	5.44068	4.0921	6.93526	6.89725	7.04324	6.97625	3.80224	3.96182
DMKN	6.7605	7.3569	6.97093	6.88707	6.38463	6.57851	6.05632	7.03327	6.63825	6.37698	6.52351	6.60695	6.89995	6.32482	6.96342	7.36365	7.06275	7.60964	7.23869	6.87488	6.21125	6.71339	6.65222	7.06154	7.08913	8.39989	7.53687	8.36328	6.43296	6.55463	4.4123	4.92113	4.98564	4.02557	6.60189	6.66727
DMPK	6.81058	6.38324	6.24437	6.51721	6.62093	6.25431	7.3928	6.65061	6.35968	5.81758	5.92579	5.32486	6.15291	6.59517	6.63313	6.19976	6.0897	6.14314	6.21926	6.58309	6.09513	6.4724	6.81771	6.97664	7.03587	6.3622	6.08349	6.07815	6.13716	6.47954	6.12924	6.03884	6.06747	6.12813	6.57528	6.9083
CRIM1 /// LOC101929500	8.84127	8.3668	8.79552	8.70793	8.91001	8.54506	9.07832	8.3437	9.09468	7.85925	7.96771	7.56155	7.44802	8.47234	8.52056	7.25833	7.31454	7.52844	7.36915	8.82478	8.44372	8.88702	9.06286	8.70814	8.6374	7.4996	7.69487	7.41037	7.02208	8.63597	7.06284	7.31001	6.99388	7.51925	8.63924	8.63555
TEAD1	7.3646	6.98219	7.91329	7.6448	7.78745	6.9337	7.7132	6.05796	7.77014	7.81466	7.44176	7.78506	7.16772	7.3794	7.23796	6.9053	6.70109	7.00209	6.87661	7.9118	6.98515	7.42786	7.51292	6.94419	7.36926	6.07481	6.25451	6.31635	5.88275	6.92851	6.75583	6.62654	6.65251	6.92021	6.88103	7.13801
TEAD2	5.37339	5.55379	5.32149	5.33979	5.42609	5.54426	5.7333	5.35002	5.22073	5.5974	5.79199	5.64566	5.68198	5.18948	5.4146	5.83957	5.69845	5.95319	5.56179	5.31321	5.412	5.60455	5.6767	5.56326	5.43884	6.03703	6.02012	6.07134	6.40201	5.2281	6.08369	6.11912	6.25121	6.18475	5.32956	5.3825
TEAD3	7.05817	6.58377	6.72374	6.5615	7.45951	6.75982	7.20864	6.86719	6.73773	7.51301	6.925	7.48681	7.67394	6.81677	6.65483	7.65319	7.18073	7.76145	7.49777	6.87444	6.56083	6.7013	6.73569	6.66916	6.91473	7.81848	7.29032	6.82655	7.55165	6.40967	7.62749	7.48599	7.48139	7.63832	6.95581	6.58176
TEAD4	6.73809	6.95256	6.91638	7.2318	7.95935	7.04615	7.14985	6.94725	7.12403	7.57495	6.82519	7.35883	7.25968	7.04396	7.20135	6.81195	6.74976	6.62263	6.83327	6.83426	6.85732	7.09757	7.25172	7.04019	7.18483	7.35581	7.09891	6.98699	7.17665	6.24446	6.75666	6.716	6.76056	7.24942	6.97354	6.59666
DMTN	7.37966	7.35936	7.19173	7.04915	6.67554	7.17794	7.05698	7.4388	7.17789	6.8417	7.02493	6.54252	6.93469	7.112	7.5951	7.02494	6.98098	7.33607	7.07825	7.23527	6.6173	7.38143	7.47249	7.5079	7.26436	6.49438	6.60996	6.54761	5.99586	6.95587	7.26374	7.20361	7.25281	7.29164	6.82124	7.135
DMWD	6.68869	6.67614	6.35698	6.60057	6.73334	6.66605	7.43251	6.77969	6.4398	6.87761	6.95843	6.84094	7.16459	6.61754	6.84275	7.24066	7.1534	7.2646	7.34636	6.65509	6.92717	6.75288	6.90574	6.92938	7.0464	7.205	6.98062	6.90439	7.36281	6.65461	6.8723	6.78528	6.77271	7.04108	6.71101	6.78205
P4HA1	8.05654	8.33931	7.72059	7.5423	7.96124	8.3054	7.79391	8.04864	7.98706	9.5012	8.71248	9.12262	9.3487	7.62532	7.98352	9.62369	9.01871	9.93727	9.16113	7.37954	8.61566	7.77895	7.77553	7.88737	7.79354	9.59115	9.34934	8.89025	9.66542	7.68887	9.89311	10.1968	9.8723	10.9771	8.22468	7.87037
P4HA3	5.70578	5.68427	5.05467	4.8703	5.40965	5.4077	5.86702	5.44705	5.21709	6.47241	6.44467	6.49745	6.59545	5.33004	5.24944	6.70065	6.48179	6.36666	6.53184	5.08857	6.61132	5.18477	5.04388	5.02336	5.01335	5.59095	5.71784	5.78183	6.27315	5.42849	6.09632	6.56501	6.21958	6.94466	5.22099	5.15447
DNA2	5.03177	4.49007	4.23681	4.45524	4.6469	4.95248	4.44126	4.95636	4.75424	6.44838	5.19593	6.06468	5.84834	4.34985	4.48919	4.31801	4.95413	4.74778	5.1673	4.2458	4.64535	4.77897	4.55106	4.47137	4.37024	6.81201	6.60494	6.33527	6.56816	4.52355	6.42511	6.20504	6.56248	5.86808	4.82795	4.57286
DND1	5.73631	6.07525	5.99619	5.8887	6.09276	5.81633	5.64997	5.97187	5.67944	5.59851	5.88356	5.6684	5.91434	5.76221	5.79023	5.97647	5.95602	6.10236	6.17437	5.92326	5.77079	5.64447	5.82605	5.97728	6.0566	6.10549	5.87596	6.04899	5.98614	5.9163	6.30126	5.9178	6.00897	5.85661	5.93525	5.92815
DNER	3.9508	7.14713	5.33502	3.88636	4.71625	3.36031	3.57471	4.78979	3.48915	3.51631	3.32639	3.33133	3.46141	4.14343	3.91753	3.4988	4.78205	3.603	3.46639	3.60063	3.19065	3.57907	4.19816	4.49412	4.84245	3.46506	3.23826	3.21822	3.00037	4.77475	3.86492	5.31581	4.43012	4.92606	5.76097	5.04667
DNM1	6.91633	6.31978	6.28526	6.02092	6.28613	6.48054	6.83143	6.53359	6.07102	7.03751	6.98283	7.07631	7.55603	6.51216	6.04332	7.34385	6.70479	7.03866	7.07287	6.52252	7.05711	6.67546	5.68978	6.34017	6.13104	7.04626	7.26605	7.34055	6.45583	6.01532	5.11791	5.92938	5.65241	6.34197	6.63237	6.92698
DNM2	6.91629	7.00573	6.63724	6.94299	7.22624	7.13557	7.04112	7.21496	6.72815	6.72559	6.90185	6.5273	6.85445	6.98062	7.18879	6.795	6.94197	6.52878	6.81327	7.0896	6.76116	6.90715	6.95832	7.19355	7.19274	7.2079	7.08352	7.10046	7.11078	6.80383	7.26395	7.00053	7.2109	6.95088	6.90088	6.89318
DNM3	5.74224	4.90999	5.31312	5.42583	5.48521	5.20399	5.27316	5.02653	5.32723	4.22836	4.1888	3.80218	4.19602	5.22112	4.92607	3.12331	3.53253	3.0575	3.3367	5.51859	4.75192	5.7647	5.7264	5.00202	5.04664	3.31101	3.21976	3.04298	3.38679	5.14106	2.71613	3.16192	3.07213	3.37176	5.13521	5.00706
DNLZ	6.2057	6.65514	6.82877	6.3109	6.09642	6.57726	6.4128	6.30036	6.52842	6.766	6.13205	6.221	5.9237	6.12911	6.26857	6.18857	6.25934	5.81757	6.25249	5.86615	6.43476	6.36304	5.96528	5.96332	5.7781	6.73907	6.82032	6.64523	6.64125	5.78773	7.34971	7.12434	7.17703	7.21076	6.84525	5.95711
MICALL1	7.48569	7.29629	7.35314	7.45441	8.0573	7.37688	7.58967	7.76089	7.26655	8.83049	7.7564	8.50124	8.5714	6.90971	7.61689	8.72179	8.47527	8.92488	8.92382	6.92836	7.45907	7.31867	7.56598	7.57664	7.4686	8.48377	8.52405	8.57064	8.35307	7.04181	8.00175	8.03295	8.10897	8.03612	7.1119	7.27165
MICALL2	5.07016	5.29724	4.9917	4.85255	5.54056	5.14162	4.9432	5.33108	5.08181	5.64148	5.55313	5.74895	5.78017	4.92393	5.07807	5.57956	5.457	5.54775	5.77678	5.0363	5.10715	5.00491	4.83867	5.24908	5.02436	5.77464	5.85513	5.70411	6.06178	5.07094	5.527	5.3979	5.3493	5.53205	5.09554	5.20096
MICALCL	5.14784	5.0493	5.62403	4.83254	5.81579	5.61447	5.27344	4.44149	4.8156	4.10338	4.26335	3.86918	3.59559	5.1368	5.08896	4.48781	4.06999	4.1632	4.2142	5.5081	4.42045	5.50229	4.9727	5.48116	5.70056	3.53219	3.33998	3.76677	3.56902	4.4974	3.97519	3.7369	3.56916	3.9257	4.86513	4.58395
DOHH	6.49991	6.64429	6.7893	6.42982	6.623	6.77881	6.36555	6.26531	6.67882	6.96436	6.53626	6.72519	6.55799	6.50072	6.44572	6.68601	6.40998	6.86216	6.61438	6.63561	6.49622	6.59677	6.52119	6.42307	6.50736	7.38388	7.20817	7.15244	7.18257	6.44739	7.70953	7.1567	7.5442	7.26224	6.53349	6.23711
DOK1	6.26898	6.7849	6.43372	6.45752	6.20058	6.64675	6.21649	6.79737	6.46712	6.33132	6.75024	6.39509	6.48753	6.50059	6.59258	6.365	6.48193	6.26171	6.00414	6.24981	6.47394	6.45419	6.43339	6.83418	6.28309	6.18018	6.40818	6.35133	6.56489	6.21807	6.02337	6.23038	6.21078	5.94505	6.21556	6.65154
DOK2	7.16558	8.54554	7.96328	7.64089	7.72682	8.10528	7.78924	8.65653	7.99292	6.60809	7.20969	6.59956	6.8696	7.91761	8.09623	7.34718	7.25391	6.81492	6.81026	7.57282	7.58498	7.81651	7.81618	8.85964	7.89329	6.72414	7.02407	6.95379	6.89633	7.62357	6.28077	6.76304	6.46971	6.18647	7.63784	8.4664
DOK3	6.43206	6.93003	6.64669	6.74168	6.80788	7.27367	6.6878	7.42711	6.73565	6.55526	7.26557	6.57174	7.01203	6.81957	6.95455	6.49943	6.98902	6.0832	6.44935	6.65033	6.81654	6.79473	6.51153	7.25222	6.79698	6.38694	6.7596	6.73291	7.01518	6.58537	5.80315	6.39108	6.08159	5.7318	6.65042	7.12922
DOK4	6.00815	6.08392	5.93293	6.08326	5.21815	6.11819	6.16494	5.98112	5.83252	5.50365	5.86622	5.4518	5.63754	5.66024	6.24286	6.0396	5.85986	6.04316	5.96024	6.17541	6.11791	6.3292	6.04498	6.51626	6.05546	5.82818	5.59846	5.36512	6.01626	5.77598	5.43867	5.50943	5.44111	5.46286	5.50935	5.97171
DOK5	5.10835	4.97684	4.68071	4.40501	5.06065	5.04965	5.39886	5.24976	4.36027	5.72276	6.04278	5.79466	6.06549	4.9072	4.2883	5.84521	6.38125	5.16957	5.63868	4.36212	6.18103	4.64889	4.23262	4.26481	4.43432	4.86775	5.08543	4.97984	5.52088	4.69204	4.63674	5.23781	4.69979	5.41069	5.11091	5.0184
DOK6	5.97103	4.82261	6.02106	5.63114	5.92851	4.33962	6.21197	4.59454	5.82524	3.96533	4.24328	4.20187	4.06476	5.95865	4.80561	4.07253	3.9303	4.09018	3.90216	5.73546	5.75223	5.46983	6.04933	4.67405	5.41038	3.51533	3.45463	3.44687	3.64539	5.61089	3.59637	3.6851	3.61012	3.72667	5.07478	4.90541
DOLK	6.91388	7.32033	7.21531	7.23525	6.74933	6.92017	7.20923	7.43099	7.32141	7.02083	7.09752	7.08493	7.1497	6.94914	7.12457	6.58804	6.80696	6.78221	6.90945	6.98107	7.2627	7.29925	7.35444	7.34639	7.10664	7.95605	7.81579	7.87939	7.85091	6.87212	6.48027	6.58013	6.6588	6.29912	6.84757	6.86978
DPCD	6.87634	8.3701	7.58514	6.83218	6.8273	6.55981	6.54134	7.23133	6.97289	8.12182	7.18663	7.80983	7.55801	7.11488	6.93078	7.29996	7.45694	7.35607	7.2951	6.77701	6.93826	6.68999	6.95842	7.02398	7.2586	7.62343	7.63519	7.68339	7.57057	7.27231	7.91494	7.71446	7.774	8.1776	7.50859	7.2399
DPF1	4.706	4.9263	4.65378	4.55762	4.94335	5.07661	4.79193	5.13032	4.47845	5.49598	5.32304	5.44453	5.60862	4.73344	4.92557	5.7701	5.31701	5.44817	5.48569	4.55946	5.05079	4.73185	4.6386	4.94522	4.93994	5.75835	5.7097	5.7269	6.01556	4.71048	5.44968	5.47017	5.57378	5.51764	4.91204	4.85156
DPF2	8.0816	8.53325	8.11256	8.06957	7.64594	8.09965	7.73627	8.15243	8.10833	8.4769	8.08589	8.56655	8.28092	8.0125	8.09611	8.24569	8.00641	8.29413	8.24293	7.8291	7.94781	8.12395	8.27878	8.01884	8.10828	8.10421	8.28461	8.40782	7.67792	8.10143	8.47294	8.30419	8.3977	8.48024	7.89962	7.84721
DPH2	5.83526	6.43293	6.15871	6.03554	6.37463	6.25857	6.28929	6.57729	6.27792	6.80543	6.55785	6.83251	6.79099	6.20744	6.16739	6.88746	6.82223	6.88067	7.08104	6.35678	6.56666	6.35213	6.00915	6.39852	6.08596	7.19222	7.09988	7.37524	6.73952	5.94707	7.60619	7.31806	7.58629	7.40364	6.01409	6.10676
DPH3	7.69763	7.67889	7.35198	7.63948	8.39336	8.10843	7.81354	7.90722	7.85784	7.2403	7.50906	7.17173	7.21089	7.98261	7.97076	7.22228	7.35628	6.90041	7.14026	7.87745	7.75192	7.68783	7.44513	7.74066	7.65595	7.18666	7.32258	7.22526	7.15635	7.32539	7.6166	7.62974	7.60342	7.58398	8.24561	7.55743
DPH5	7.41896	7.64943	7.40055	7.46148	7.07914	7.31671	7.24425	7.50521	7.34159	7.33362	7.61458	7.51733	7.27331	7.35268	7.52342	7.57865	7.69726	7.47279	7.58598	7.45293	7.65699	7.45199	7.50786	7.52769	7.38494	7.82901	7.98333	8.39846	7.56473	7.65514	8.444	8.12392	8.36079	7.94617	7.54732	7.39687
DPH6	5.64199	5.93987	5.34492	5.36145	5.87149	5.71098	5.91049	5.71434	5.73473	7.57977	6.18786	6.91197	6.65369	5.84269	5.98445	6.38823	6.26568	6.55725	6.64509	5.67555	5.85622	5.54586	5.33323	5.60992	5.45535	5.65759	5.95455	5.94296	5.33496	5.51446	7.9732	7.84948	8.10435	8.16946	5.63709	5.64563
DPH7	6.67703	7.16369	6.9446	6.85174	6.35997	6.81342	6.50213	6.89976	6.72401	6.7156	6.42134	6.46168	6.70583	6.71472	6.7021	6.42527	6.5603	6.46435	6.69063	6.66332	6.88931	6.71613	6.98769	6.85089	6.71875	6.81319	6.92222	6.96062	6.90945	6.93209	6.40536	6.2387	6.46832	6.36493	6.69404	6.81008
DPM1	9.05701	9.12579	8.94333	8.95176	9.21281	9.06962	8.82129	9.03974	9.12818	10.0253	9.41274	9.82988	9.68708	9.05236	8.99403	9.19758	9.29714	9.2666	9.3366	9.10294	9.14825	9.04389	9.09434	8.91766	9.01232	9.875	9.59498	9.25908	9.72202	8.97124	10.2195	10.1362	10.1922	10.2791	9.30733	8.88808
DPM2	7.48933	8.04553	7.51427	7.38597	7.32742	7.52106	7.44109	7.89736	7.42896	7.69629	7.63327	7.53416	7.7718	7.5638	7.59331	7.47837	7.4324	7.26676	7.705	7.3081	7.711	7.64017	7.37898	7.66056	7.60753	8.28974	8.24878	8.21815	8.18212	7.44332	7.7852	7.62898	7.69187	7.76265	7.35609	7.6521
DPM3	7.89134	8.77375	7.98919	7.80497	7.66772	8.34427	7.89441	8.01733	7.79408	8.27092	8.16524	8.24356	8.29607	7.75005	8.11702	7.54314	7.71734	7.52959	7.83441	7.8039	7.79772	7.89751	7.74085	7.60158	7.74184	8.51853	8.26332	8.08755	8.7483	7.77264	8.56218	8.37783	8.52974	8.50305	7.7931	8.15077
DPP3	7.47641	8.21821	7.89935	7.70838	7.62811	7.90265	7.83879	8.16648	7.67009	8.72421	8.2275	8.42635	8.32051	8.00562	8.04281	8.90074	8.62848	8.87475	8.88712	7.57332	8.11672	7.93616	7.56696	8.32969	7.89414	8.7136	8.80453	9.07329	8.24682	7.61328	9.01043	8.78393	8.94525	8.80922	7.69352	7.92447
DPP4	5.6311	5.9941	5.9429	6.31619	6.48452	6.70256	6.4354	6.43927	6.03043	5.34332	6.62124	5.54373	5.54316	6.22006	6.39284	6.07628	5.83257	5.88485	5.94744	6.38967	6.54984	6.28797	5.65795	6.34171	6.16903	4.6418	4.69017	5.07102	5.29767	5.64492	4.78545	5.0387	4.78742	4.29415	5.83324	6.02543
DPP6	4.63834	5.06037	6.71502	5.87529	4.07111	3.69664	4.55918	4.26548	6.05317	3.23341	3.47453	3.31647	3.17606	5.45822	3.60548	3.51414	3.22962	3.51511	3.67801	5.41556	4.00265	4.89974	6.69876	4.99901	4.09872	3.21765	3.18934	3.29699	3.50894	4.26283	3.66778	3.37806	3.36425	3.47689	4.59169	4.742
DPP7	7.17934	8.33048	7.6799	6.86691	6.94393	7.13585	7.00468	7.63969	7.12005	7.08925	7.04433	6.57012	6.94643	7.01434	7.29256	6.54391	6.97761	6.40009	6.77481	6.89045	7.12511	7.11627	7.10427	7.52997	7.29919	7.49535	7.74796	7.91247	7.36208	7.34611	6.36445	6.41861	6.4523	6.37292	7.10889	7.44794
DPP8	8.06135	7.75796	7.91138	8.07697	7.79656	7.79959	8.07023	8.07739	8.05042	7.92147	7.9399	7.88989	7.8087	8.10645	8.05313	7.96418	8.04934	8.13001	8.05472	8.11645	8.23821	8.17897	7.8116	7.95908	7.95812	8.34652	8.46253	8.50769	8.00525	8.10204	8.37919	8.35581	8.381	8.26649	7.94903	7.94992
DPP9	7.11655	7.04203	6.99285	6.83145	6.92747	7.14751	6.99853	7.34774	6.83118	6.85536	7.0925	6.72549	7.08781	6.86602	7.25893	7.09327	7.0481	7.0415	7.17489	6.96472	6.95608	7.07956	6.86433	7.36889	7.15486	7.33741	7.35235	7.2361	7.47046	6.94687	7.13991	6.96655	6.98663	7.02668	6.77309	7.13707
AK021804	6.30717	4.19011	5.92005	5.81655	6.89231	6.05305	5.6687	4.87864	5.60285	5.37153	4.90167	5.22111	5.60057	5.84695	5.27505	4.77663	5.49115	5.02517	5.25292	5.92485	6.06859	5.32277	4.64288	5.06835	5.48307	3.20694	3.61199	3.49893	3.66909	6.30064	3.41982	3.70351	3.52621	3.42192	7.48685	6.6265
DPYD	8.26647	8.27222	8.31217	8.4072	8.05151	8.26638	8.06877	8.88406	8.28274	7.74633	8.59249	7.43173	7.49212	8.32135	8.23437	7.59757	8.19906	7.1992	7.5428	8.5777	8.54553	8.45647	8.42254	8.48275	8.19291	7.16745	7.18388	6.94023	7.65704	8.40448	6.27487	7.6377	6.94014	6.77975	8.42668	8.36683
CLPTM1L	9.35187	9.63726	9.58389	9.65729	9.16612	9.63386	9.38905	9.62812	9.69325	10.3414	9.83753	10.0194	10.0567	9.31085	9.66857	10.2337	10.0603	10.3566	10.4032	9.51338	9.49015	9.62976	9.57302	9.84029	9.65384	10.1375	10.1073	10.0363	10.2417	9.39126	10.4471	10.213	10.4454	10.2553	9.17684	9.53368
E2F1	5.62666	5.9144	5.56968	5.60252	5.62115	5.68663	5.64651	5.74031	5.48992	6.55053	6.13586	6.28218	6.4475	5.67059	5.86498	6.02638	6.07483	6.06702	5.91956	5.40405	5.73325	5.67986	5.77406	6.08034	5.86864	6.23029	6.16549	6.12619	6.29665	5.50883	6.14765	6.07216	6.19507	5.96597	5.49559	5.66799
E2F2	4.73832	5.09063	4.53623	5.14528	5.38104	4.90071	4.85058	5.24371	4.68275	6.50599	6.0632	6.67113	6.57423	5.30611	5.36492	6.00194	5.90434	5.85028	5.88195	4.62378	5.23777	5.21798	5.09214	5.01727	4.97114	6.70243	6.73636	7.08726	6.21227	5.01759	6.82871	6.35128	6.6427	6.06	4.85408	5.00135
E2F3	5.99947	5.858	5.76826	5.92727	6.79069	6.34188	6.09555	6.20273	5.87143	7.39379	6.80124	7.49929	7.33386	6.08125	5.99181	6.62742	6.75812	6.66426	6.85049	5.85402	6.74674	5.93205	5.53169	5.91419	5.88606	7.21565	7.18467	6.85556	6.62547	5.9367	7.5721	7.12681	7.35924	7.27473	6.13802	6.02233
E2F4	6.9983	7.24138	6.97918	7.02406	7.19709	7.25531	7.25607	7.26698	7.02386	7.48534	7.38879	7.3628	7.47547	7.15978	7.19891	7.51903	7.45739	7.46169	7.66438	7.21924	7.22217	7.14727	7.16075	7.31252	7.23106	7.51265	7.32625	7.3643	7.74159	6.95468	7.21675	7.07526	7.19648	7.04572	7.09785	7.159
E2F5	4.99656	5.46442	5.11871	4.97343	4.90879	5.64611	4.8577	5.24614	5.17464	5.18798	5.58188	5.67288	5.45837	5.04466	5.33415	4.65587	5.0047	4.45147	4.95792	5.47341	5.3864	5.10982	5.24216	5.02284	5.02225	5.58413	5.60296	5.73509	5.62778	4.87674	6.60881	6.24391	6.43822	6.14522	4.74895	4.80781
E2F6	6.48615	6.84695	6.6138	6.4812	7.04384	7.02668	6.68136	6.77708	6.65856	7.30723	6.78771	7.57692	7.3907	7.0491	6.57408	6.69839	6.68844	7.15306	6.96412	6.51381	6.69221	6.61916	6.55888	6.4965	6.36371	8.24812	7.99413	7.93389	7.9397	6.46237	7.19865	7.00484	7.13476	7.0446	6.75873	6.30845
E2F7	3.24826	3.62602	3.06984	2.76876	3.11894	2.76202	2.86273	3.46678	2.7754	8.30902	5.83395	7.91868	7.80871	2.98159	3.15888	4.75634	4.47351	4.83924	5.13966	2.72794	3.18349	3.07212	3.0284	3.1328	3.26772	7.6698	7.41032	6.68386	7.14763	2.85539	7.32679	7.06232	7.51261	7.02399	3.31738	3.00965
TMEM63A	5.71621	5.76603	6.34086	6.26726	5.48908	6.08129	5.74742	5.92125	6.18676	5.78033	5.91488	5.91142	5.98104	5.75187	6.00578	6.01559	5.84487	6.02985	6.01733	6.22229	5.61204	5.9829	6.20421	6.68266	6.21927	6.00897	6.13138	6.04507	6.42039	6.13588	5.90454	5.84861	5.77284	5.75559	5.50181	6.31931
TMEM63B	7.36182	7.3126	7.33615	7.0822	7.31409	7.43395	7.25562	7.43468	6.9802	7.22713	7.35048	7.00448	7.02874	7.18051	7.3333	7.84863	7.43591	7.8382	7.66541	7.09211	7.23286	7.13383	6.92885	7.37401	7.32987	7.15981	7.01945	6.94902	7.51629	6.74931	7.65819	7.36449	7.37338	7.74602	6.99414	7.23482
TMEM63C	4.42666	4.22736	4.05738	4.26094	4.61887	4.39498	3.97379	4.36009	4.31065	5.77888	4.72873	5.33735	5.65826	4.51257	4.33158	5.02253	4.8421	5.41479	5.15972	4.06863	4.42868	4.34673	4.12736	4.32963	4.18161	5.09207	5.08121	5.22245	5.02251	4.25539	4.8478	4.6627	4.61991	4.79813	4.38226	4.39248
ACOT11	5.11976	5.3149	5.08922	5.07489	5.04733	5.40077	5.25646	5.54107	4.99366	5.90013	5.39273	5.54376	5.55554	5.01483	5.18282	6.16372	5.66249	6.12616	5.9752	4.97319	5.23519	5.17125	4.87469	5.30469	5.13482	5.45414	5.49896	5.68243	5.81984	5.20155	5.83071	5.90179	5.89108	6.35416	5.00999	5.16268
ACOT13	7.55518	7.99991	7.76154	7.69143	7.65587	7.86624	7.43315	8.10692	8.15845	8.95479	8.46321	9.0885	8.68036	7.63373	8.45303	8.05277	7.85822	7.99925	8.06141	7.74196	8.17199	7.81408	7.52155	8.27854	7.87345	8.14261	8.36961	8.34743	8.02967	7.52748	9.30319	8.94123	9.13866	9.03254	7.68519	7.82834
DQX1	4.2117	4.83386	4.11562	4.23707	4.05956	4.12124	4.46443	4.34919	4.09294	5.3195	4.46824	5.20135	4.99033	4.28521	4.28227	5.33385	4.90667	5.61719	5.56327	3.77078	4.22152	4.08562	4.01874	4.32914	4.11837	7.03659	6.22747	6.13111	6.36604	4.15178	6.34506	6.31151	6.06338	6.57911	4.26199	4.35355
DRD2	4.7993	5.35104	4.91386	4.94008	4.95219	5.17585	5.14892	5.27774	5.02846	5.51912	5.49528	5.50018	5.42109	5.09031	5.33927	5.37009	5.36788	5.32789	5.45592	4.98042	5.13633	5.07718	4.98056	5.2942	5.10782	5.42376	5.31143	5.33796	5.54761	5.19088	5.09234	5.27532	5.08618	5.28269	5.17079	5.32584
DRC1	5.14654	6.89473	5.98546	5.24698	5.5233	4.69538	5.0791	5.49725	4.54374	4.7581	4.79105	4.89126	4.7842	5.45612	5.28908	4.93507	5.92133	4.852	4.67935	4.6917	4.79096	4.48471	5.33938	5.54863	6.0371	4.70782	4.75241	4.8507	5.00495	5.645	4.87796	4.8681	4.7695	4.99038	6.37689	5.58537
DRG1	8.74213	9.22868	8.83974	8.92522	8.7201	8.73994	8.72973	8.97093	9.02906	9.86174	9.26849	9.91681	9.54942	8.86253	8.74992	9.28888	9.08415	9.27714	9.26635	9.02187	8.94149	8.97604	8.91742	8.88336	8.80299	9.56361	9.47138	9.81833	9.53167	8.85322	10.021	9.78444	9.9954	9.95074	8.79662	8.80939
DRG2	6.90078	7.18255	6.96041	6.95434	6.73424	6.86545	7.15963	7.13783	7.01487	6.84698	6.9561	6.7828	6.72872	7.08777	6.92366	6.87984	6.87414	6.79057	6.93393	6.90745	7.02954	6.91904	7.01854	7.21071	7.01919	6.83865	6.66633	6.83377	6.68015	6.84857	7.83134	7.51049	7.75567	7.51991	6.91495	7.04651
TMEM74B	7.36333	8.49186	8.23915	8.18191	7.35061	7.56026	7.69001	7.19131	7.62356	5.67827	5.93364	5.48399	5.77055	7.99787	6.96543	5.90534	5.91477	5.80252	5.96826	7.89264	6.73564	8.21093	8.11918	7.5973	8.10849	5.3438	5.54424	5.5199	5.60223	8.26603	5.94767	6.21223	5.86387	6.74516	7.71217	8.41547
DRP2	5.20377	5.26852	5.12118	5.27405	5.22248	5.44219	5.42538	5.64148	4.97798	5.35296	5.44665	5.35862	5.5656	5.26209	5.13147	5.22331	5.53152	5.25629	5.68891	5.11911	5.2536	5.03973	5.27787	5.18251	5.38846	5.32946	5.30126	5.72317	5.7339	5.49424	4.97376	5.15461	4.94241	5.17017	5.15345	5.47979
PAXBP1	7.2317	7.09552	7.38537	7.13162	7.09923	7.07175	6.94908	6.96406	7.31123	7.32131	6.63041	7.1299	7.18139	7.14783	7.04908	6.33296	6.64521	6.55056	6.709	7.31721	6.81341	7.02435	7.21136	7.20352	7.1592	6.53157	6.52796	6.65637	5.98521	7.41959	7.27896	7.01624	7.42661	7.17154	7.32172	7.01287
STARD3	7.20738	7.1249	7.12961	7.29331	6.73631	6.98836	7.22791	6.95804	7.16435	6.83996	6.82398	6.54993	6.9165	6.8871	7.27345	7.25375	7.089	7.08783	7.09568	7.60381	7.07662	7.02746	7.5984	7.13068	7.23684	7.00106	6.95267	7.01053	6.87867	7.03442	6.99068	6.86527	6.8375	6.80287	6.82466	7.01142
STARD4	8.0474	7.56534	7.42201	7.97621	8.90769	8.10178	7.66836	7.8941	7.70574	7.03721	6.80516	7.25535	7.21983	7.66454	8.23629	6.93061	6.83864	7.19981	7.3003	7.69859	6.68882	7.77361	7.42802	7.99504	7.72576	7.53443	7.13723	7.2139	7.36592	7.58959	7.46386	7.70061	7.47877	7.91946	8.0561	7.70303
STARD5	5.56772	6.22002	5.47447	5.74951	5.87002	5.93174	5.62227	6.17254	5.53658	7.46341	6.9369	7.72474	7.76332	5.57003	5.88657	7.18125	6.97457	7.45267	7.27647	5.71593	6.37697	5.72714	5.60935	5.86715	5.73982	7.73238	7.64716	8.03496	7.75427	6.2742	6.14691	6.44659	6.36456	6.18792	5.56363	5.82768
STARD7	10.2453	10.4732	10.4171	10.4728	9.79366	10.0455	9.83597	10.1867	10.5351	10.1274	10.0809	10.1355	10.0189	10.2617	10.3414	9.98297	10.0218	10.305	10.0404	10.2153	9.96473	10.5602	10.4483	10.2763	10.2589	10.5516	10.5781	10.6385	10.3282	10.1817	9.70292	9.68308	9.86936	9.37563	9.92911	10.2084
STARD8	7.00016	6.9837	7.04352	7.45655	7.21604	7.13249	7.45146	6.81895	7.41619	5.76786	6.42782	5.85368	5.95002	7.07381	7.33727	6.38571	6.42475	6.01399	6.4164	8.27792	7.17264	7.30514	7.7727	7.48764	7.63658	5.38904	5.79345	5.88757	6.11539	6.98607	5.44415	5.8907	5.43887	5.34712	7.14526	7.16616
STARD9	7.22716	5.70212	7.39945	7.21463	6.52756	6.31709	6.86982	5.87307	6.89092	4.48808	4.69908	4.40243	4.63654	6.63872	6.64363	4.37925	4.69753	4.2476	4.55908	6.74752	5.75426	6.80176	7.53933	6.32929	7.20991	4.2075	4.02157	4.10847	4.20899	7.40037	4.03764	4.03902	4.09173	4.00129	6.68859	6.5823
PPARGC1A	6.0616	5.5198	6.28408	5.53497	5.63513	5.38879	6.09872	4.80813	5.91176	3.76858	4.42818	4.11391	3.94061	6.60058	5.2683	5.04972	4.84893	5.60866	5.40118	5.47085	5.01705	5.94671	5.91912	4.58399	5.67488	3.43179	3.27048	3.4992	3.55905	5.66613	3.74603	3.14137	3.33797	3.17184	4.89658	5.32572
PPARGC1B	7.72827	5.74708	5.74179	6.01911	6.18817	5.47859	6.50604	6.34332	6.39508	5.28985	5.38252	5.02826	5.07411	5.90306	7.04014	5.5855	5.82644	5.75047	6.11542	6.55092	6.70238	5.83422	6.01509	6.0329	6.7072	6.23109	6.19879	6.26301	5.39504	6.53678	5.06133	5.22078	5.15414	4.70108	6.75888	6.00234
DSC2	5.17021	6.40775	6.02881	6.00634	5.54824	5.68181	5.64175	5.27768	5.54126	7.93506	6.56052	7.5538	6.63735	5.97978	5.55722	8.48961	7.85997	8.97167	8.35973	5.90254	5.78845	5.26284	5.21043	5.07393	5.42002	7.895	7.52452	6.73011	7.22093	4.704	9.34313	8.87182	8.89764	9.50626	4.98639	5.76118
DSC3	3.81806	4.02297	3.48508	3.41898	3.67813	3.46101	3.50939	3.7668	3.33991	9.77367	6.76771	8.83093	8.62325	3.6183	3.6625	8.95909	8.17441	9.70136	9.12081	3.42386	3.65354	3.40301	3.39165	3.46299	3.71012	10.06	9.71103	9.90392	9.02251	3.75982	10.6509	10.274	10.5213	10.6961	4.72063	3.64899
DSEL	5.56166	5.13673	5.94015	5.62642	4.78334	5.22454	5.83114	5.59415	6.0855	3.75159	4.86523	4.96441	5.70359	4.94786	5.54695	4.1339	4.16646	4.0667	4.26152	6.58157	5.73668	5.79164	6.70846	5.53892	5.3341	2.28886	2.46861	2.38699	3.01856	5.28506	2.32033	3.28763	2.5372	2.68853	5.24798	5.03285
E4F1	7.09988	7.08749	7.01253	7.02094	6.93098	6.96942	7.0432	6.86336	7.10966	7.02069	6.82321	6.90862	7.03005	6.92401	6.85591	6.88336	6.86571	7.09935	6.84336	6.77712	6.79096	6.95418	7.03921	7.00226	7.11168	6.8384	6.81021	6.69359	6.79127	7.06206	6.89191	6.69211	6.84235	6.78149	6.79668	6.95708
DSG2	6.35004	6.78051	6.72134	6.30213	5.93419	6.31293	6.04582	6.50145	6.51864	8.82513	7.34791	8.54811	8.14151	6.22261	6.92984	8.85477	8.06342	9.18648	8.69542	6.7561	5.91412	6.72521	6.58997	6.70062	6.60249	9.5074	9.26022	8.99368	9.17528	5.70466	10.0047	9.92186	9.97967	10.1569	6.01449	6.03849
DSG3	3.32992	3.41734	3.24969	3.23673	3.51762	3.35535	3.37549	3.43857	3.32131	9.90084	7.52408	9.24974	8.81404	3.51133	3.47221	10.4797	9.61369	10.8087	10.2534	3.32923	3.38402	3.38512	3.32993	3.2796	3.31952	10.3299	9.80659	10.0072	9.87073	3.54913	10.9928	10.8651	10.9259	10.9429	3.45677	3.35554
DHODH	5.35923	5.61744	5.35058	5.1519	5.21158	5.66231	5.38248	5.42419	5.59465	5.88728	5.38536	5.34789	5.14295	5.17966	5.55566	5.43248	5.372	5.53251	5.45012	5.25609	5.90781	5.66858	5.24372	5.39781	5.4389	5.37784	5.47568	5.67379	5.38175	5.33024	6.1083	5.78845	6.00119	5.79904	5.41888	5.31089
TMEM87A	9.96627	9.80661	9.72508	9.66566	9.50523	9.80858	9.63498	9.59284	9.7114	8.99549	9.40945	8.81546	8.90447	9.62735	10.0658	9.76248	9.46476	9.72515	9.68126	10.2097	9.35053	9.92434	9.77326	9.87549	10.004	9.04302	9.21561	9.30088	8.64271	9.81179	9.18396	9.21772	9.13979	9.48592	9.67293	9.61839
TMEM87B	7.1985	7.02631	6.98564	7.12786	6.93377	7.19955	7.59368	7.15314	7.30981	7.48827	7.53801	7.53096	7.34925	6.79399	6.9568	7.61739	7.61011	7.86461	7.53728	7.17978	7.4047	7.18338	7.24373	6.92299	6.86392	7.16126	7.2279	7.10387	7.02955	6.78667	7.28202	7.42444	7.40941	7.51314	6.91761	6.86429
DSN1	5.12914	5.18658	5.26316	5.40221	4.64609	5.02645	5.064	4.669	5.426	6.41544	5.2879	6.26134	6.04007	5.30421	5.31895	4.90142	5.16787	5.16309	5.22031	5.42493	4.86496	5.56104	5.43215	5.02193	5.08427	6.15622	5.60624	5.43165	5.73066	5.43162	6.29407	6.06912	6.48846	5.82895	4.89398	4.99557
TMEM86A	5.55003	5.93755	5.29812	5.49324	5.22487	5.63324	5.75691	6.38497	5.65292	5.49211	6.07775	5.67657	5.73308	5.48428	5.81674	5.54863	5.56881	5.37909	5.54579	5.25347	6.34275	5.70362	5.45804	6.26288	5.59802	5.86829	5.9258	6.07896	6.17179	5.98521	5.52626	5.77645	5.65548	5.5374	5.44771	5.6715
DSTN	11.6687	11.7627	11.8356	11.9475	11.8252	11.7699	11.6662	11.6727	11.817	11.019	11.2074	11.0369	10.8909	11.7431	11.8603	11.4103	11.2487	11.327	11.2858	11.8965	11.3974	11.8528	11.8379	11.803	11.7948	10.8087	10.7014	10.6841	10.8594	11.4916	11.2062	11.2245	11.1721	11.2256	11.616	11.7263
AK021977	6.17196	3.38111	6.12515	6.56	6.92301	4.70923	6.00907	3.55413	6.04572	3.38625	3.50557	3.56661	3.42779	5.88928	5.59226	3.89314	4.34393	4.31015	4.45087	7.05582	3.9197	5.9372	5.78682	5.44158	5.56176	3.61351	3.3315	3.27133	3.43633	6.00861	3.52717	3.63076	3.6127	3.45799	5.70567	5.5656
DTD1	8.14524	8.63775	8.31406	8.0009	8.01659	8.1153	8.31325	8.56826	8.3124	8.72712	8.25899	8.31637	8.39629	8.20695	7.94777	8.65067	8.48959	8.80678	8.81661	8.05085	8.19651	8.09339	8.06939	8.09849	8.07907	8.91446	8.76544	8.71343	8.18195	7.99596	9.27075	8.91239	9.06879	9.23853	7.83913	8.19179
DTNA	4.99264	5.13898	5.12158	5.38508	5.55636	5.47458	5.46634	5.31129	5.22252	4.40216	5.30785	4.45894	4.51334	5.38302	5.11805	5.30489	5.36904	5.56205	5.5303	5.29563	5.26639	5.3744	5.59721	5.35832	5.26078	5.08671	5.01606	4.75358	4.79805	5.42049	6.11797	5.52462	5.69509	6.57443	5.27227	5.50179
DTNB	6.12868	6.09131	5.74418	5.52244	5.86862	6.10373	5.8949	6.17596	5.73004	6.43185	6.43127	6.48024	6.74114	5.8718	5.79392	5.97922	6.19337	6.3493	5.84715	5.70227	6.08003	5.72749	5.5462	5.99742	6.03553	6.33508	6.48732	6.36047	6.72365	5.75566	7.06795	6.75568	6.99087	7.15551	5.65897	5.97087
DTX1	5.93883	5.81917	5.32543	5.31896	5.8333	5.74113	5.84006	5.99777	5.25905	5.28045	5.69769	5.40951	5.52285	5.45299	5.54963	5.47637	5.51702	5.4574	5.56132	5.20491	5.79382	5.43288	5.13878	5.24043	5.49569	5.11684	5.22825	5.43554	5.26798	5.93416	5.16765	5.45323	5.32089	5.44253	5.66248	5.51677
DTX3	5.76948	6.00863	5.95307	5.94553	5.89225	5.6253	6.38985	6.08362	5.75942	5.78006	6.03096	6.02591	6.14218	5.74515	6.26522	6.08247	5.90658	6.11679	5.90833	6.00372	5.82277	5.82345	6.02765	6.4023	6.29736	6.07715	6.0372	6.13919	6.11512	5.98303	6.1086	6.07547	6.2185	6.23798	5.90392	6.12366
DTX4	8.75664	8.86952	9.33925	9.09804	8.64885	8.645	8.64194	8.87004	8.99567	7.68631	8.06587	7.80519	7.88143	8.44428	8.99235	8.34665	8.02211	7.68139	7.84679	8.43393	7.90523	8.89454	9.13072	9.45085	8.98478	7.69985	7.6462	7.32775	7.4042	8.84082	7.53773	7.78154	7.54107	7.74912	7.95564	8.75495
POLRMT	7.18258	7.67124	7.33741	7.3463	7.01084	7.65749	7.41222	7.42271	7.4401	7.78221	7.5096	7.36204	7.63525	7.10419	7.51534	7.26253	7.34021	7.17266	7.49798	7.23271	7.39409	7.47197	7.55247	7.68544	7.4853	7.32632	7.41466	7.56266	6.87117	7.31684	7.72896	7.45626	7.82764	7.68445	7.15603	7.34868
SP140L	7.08741	7.27935	7.34548	7.19703	7.14102	7.31762	7.20205	7.4343	6.40252	6.57876	6.87557	6.50961	6.79998	7.00059	7.36871	7.72675	7.7108	7.78641	7.82778	7.22204	7.57442	7.44637	7.34112	6.85515	7.36041	7.52022	7.53634	7.36402	7.2721	7.25572	7.50059	7.30882	7.56739	7.2776	7.30554	7.24665
DUS2	6.42694	6.63704	6.18104	6.33002	6.10803	6.44625	6.17749	6.55316	6.32717	6.83429	6.59628	6.59273	6.56903	6.27637	6.46314	6.3612	6.39039	6.33862	6.3321	6.05037	6.55292	6.22867	6.25986	6.41259	6.17992	6.20815	6.39963	6.4207	6.38611	6.23407	6.90235	6.70034	6.89033	6.56266	6.29993	6.29932
TEKT1	4.86678	8.28966	6.94582	5.04892	5.69618	4.50999	4.65355	6.09673	4.35966	4.22086	4.77814	4.37785	4.34231	5.76937	5.22984	4.30168	5.91874	4.45939	4.20977	4.5349	4.75435	4.07836	5.38274	5.76322	6.70061	4.40697	4.39765	4.46806	4.76243	7.10195	4.66028	4.65857	4.48026	4.28037	7.02744	6.54615
TEKT2	4.88824	7.8569	6.81147	4.96705	5.58869	4.57094	4.44423	5.58314	4.45998	4.62318	4.63268	4.591	4.32557	5.73394	5.20905	4.34556	5.53122	4.28617	4.11332	4.39264	4.85357	3.94025	5.36023	5.68388	6.59143	4.36349	4.32724	4.46666	4.7903	6.77214	4.7863	4.69468	4.63742	4.79975	6.78006	6.22164
DHRSX	6.28864	6.53695	6.16109	6.19125	6.10665	6.21363	6.26791	6.50363	6.4176	6.92761	6.4964	7.26716	7.04376	6.33437	6.33472	6.27522	6.27902	6.3517	6.47061	6.01342	6.54498	6.26752	6.12566	6.19379	6.25773	5.95023	5.94004	6.00864	5.95274	6.2886	5.91809	5.99181	5.96173	6.17925	6.08184	6.36613
DHRS1	8.25702	8.96629	8.39505	8.2686	8.08254	8.6648	7.95304	8.62854	7.92857	8.33535	7.67102	7.86827	7.97647	7.78152	8.44731	7.77091	7.7136	7.71584	7.76278	8.11361	8.30502	8.40462	8.49523	8.15436	8.13401	6.95259	7.15558	7.30461	7.45748	8.34814	8.37069	8.31549	8.25582	8.26996	7.88436	8.67747
DHRS2	4.11401	3.94103	4.03464	3.99174	3.84371	3.92692	4.17988	3.92937	4.288	4.18605	3.8793	3.95247	3.76051	3.70924	4.02469	3.83388	3.75539	3.90743	3.91305	3.77965	3.72889	3.92193	4.36048	3.83001	3.93805	4.04183	3.94072	4.18964	3.94796	4.09698	5.44728	5.14551	5.6085	4.87577	3.72848	3.96393
DHRS3	8.77238	9.79659	9.27398	9.3865	8.62591	8.99981	8.45544	9.20624	9.01948	8.6617	8.7456	8.62889	8.50045	9.31245	9.37077	9.42764	9.03203	9.45994	9.37723	9.37765	8.74031	9.04828	8.94622	9.29118	9.41126	9.4981	9.82198	10.2144	8.95284	9.35495	9.67062	9.86484	9.79476	9.77506	8.8248	9.14751
DHRS7	9.06244	9.2944	9.36968	9.46596	9.18844	9.48066	9.26965	9.39853	9.26327	9.58741	9.51763	9.6775	9.32274	9.59803	9.1954	9.42899	9.33977	9.62457	9.42215	9.44169	9.14165	9.41806	9.34954	9.49637	9.29603	8.01757	8.26924	8.22852	8.65923	9.24617	8.1218	8.34793	8.11239	8.38921	8.97532	9.29817
DHRS9	5.87771	7.49694	5.71802	5.62358	7.28807	5.93661	7.34102	7.35742	7.00662	5.38476	6.53789	6.43852	6.43537	7.045	6.59309	5.40305	6.87043	5.52693	5.13358	5.72613	7.58498	7.2227	5.3939	6.70323	7.0525	5.65734	5.87022	6.28869	6.45074	8.13611	8.9273	8.49982	8.88974	6.76636	7.22438	7.24568
STAMBP	5.39216	5.33509	5.56715	5.63834	5.39674	5.7381	5.6259	5.56393	5.70646	6.44819	5.57241	6.0197	6.3534	5.28543	5.60078	5.75627	5.64559	6.04979	5.97808	5.52365	5.3033	5.41526	5.90432	5.58501	5.71912	5.73977	5.69718	5.62693	5.55834	5.4747	6.22164	5.99174	6.01862	6.41538	5.3943	5.50977
DVL1	8.32965	8.0322	8.11448	8.2834	7.86741	8.05491	7.83337	8.11038	8.17538	7.83905	7.68137	7.31137	7.71657	7.6646	8.06077	8.2274	7.90278	8.42504	8.04196	8.03317	7.58807	8.10331	8.31852	8.01886	8.32372	7.90304	8.02888	8.34181	7.77255	7.91379	8.63125	8.3484	8.48402	8.57702	7.75404	7.9713
DVL2	6.68678	6.66466	6.59662	6.55381	6.18964	6.42823	6.57048	6.70174	6.58337	6.96679	6.8558	7.10604	7.19101	6.4169	6.60313	6.64622	6.55973	6.82928	6.76273	6.52646	6.64429	6.55298	6.65194	6.65386	6.64886	7.05355	7.04822	7.07057	7.17752	6.70306	7.79186	7.63247	7.77448	7.80194	6.4209	6.6249
DVL3	6.71054	6.5185	6.58699	6.57315	6.71993	6.5954	7.09199	6.66114	6.58914	9.56955	8.46743	9.30232	9.67457	6.66014	6.71892	7.76113	7.50838	7.90482	7.63714	6.65732	6.89835	6.74067	6.69403	7.09741	6.88514	7.75523	7.66275	7.7112	7.76025	6.73948	7.5236	7.50615	7.56404	7.5541	6.51107	6.79182
POLR1A	5.46741	5.70193	5.30682	5.42575	5.64664	5.81333	5.62157	5.64866	5.7689	6.13787	5.59559	5.50482	5.83095	5.57056	5.6078	5.85208	5.84961	6.06757	6.1345	5.83475	5.99486	5.66439	5.45249	5.85448	5.40747	6.15474	6.2911	6.36319	6.02265	5.66379	6.84915	6.42547	6.80131	6.44918	5.54856	5.50501
POLR1B	6.20092	6.47577	6.66898	6.8373	6.23844	6.11661	6.11008	6.44027	6.47507	6.75042	6.638	6.55306	6.7631	6.53985	6.30401	6.37685	6.58483	6.63678	6.68799	6.84091	6.73346	6.7659	6.7439	6.49551	6.4202	6.83172	6.84872	6.62179	6.62703	6.09426	6.51388	6.65067	6.49157	6.57565	6.41287	6.1278
POLR1C	6.52663	7.24054	6.82033	6.49072	7.52229	6.97249	6.49867	6.7053	6.70998	7.53228	6.93122	7.39437	7.01168	6.98548	6.50217	6.57823	6.76255	6.67883	7.01854	6.64306	6.99924	6.62154	6.4702	6.54695	6.4804	8.03871	7.68302	7.68699	7.47886	6.55677	8.69379	7.9916	8.39009	8.10551	6.79101	6.57225
POLR1D	7.88994	8.31558	8.02736	7.97403	7.40912	7.68113	7.6948	8.2636	7.98481	7.85808	8.24211	8.03393	8.0769	7.71329	8.04108	7.66237	7.74449	7.71087	7.68871	7.99299	7.89543	7.89339	8.09708	8.14439	7.83863	8.5654	8.61439	8.72652	8.30806	7.61774	8.72597	8.393	8.5916	8.64473	7.71089	7.91533
POLR1E	6.70304	6.7054	6.46726	6.52178	6.76727	6.80116	6.70563	6.42646	6.87772	6.90086	6.93368	6.71415	6.81692	6.89186	6.7173	6.48621	6.63331	6.34462	6.74965	6.63158	6.52315	6.75622	6.66153	6.75858	6.63679	6.1838	6.4585	6.55374	5.95579	6.91655	8.08408	7.67031	8.16082	7.93809	6.80688	6.60133
POLR2A	7.92494	7.90641	7.66332	7.87584	8.05199	7.88362	8.13088	8.10787	7.76577	7.89309	7.9532	7.6736	8.00281	7.91724	8.10123	8.31235	8.05867	8.28983	8.16562	7.54503	7.65236	7.82417	8.0437	8.05986	8.02516	8.24126	8.21254	8.12945	8.14354	7.78311	8.85537	8.6173	8.6605	8.69444	8.08239	8.07973
POLR2B	9.203	9.3472	9.48689	9.42514	9.16764	9.18441	9.04802	9.37759	9.34201	9.30215	9.44966	9.39594	9.33821	9.27757	9.19586	9.58994	9.59553	9.72463	9.63632	9.40238	9.41377	9.3399	9.36154	9.32974	9.25776	10.4603	10.2864	10.1839	10.2409	9.4063	9.43253	9.4429	9.47585	9.3754	9.25362	9.137
POLR2C	8.28607	8.65263	8.30226	8.01762	7.98869	8.36637	7.76554	8.37958	8.33882	8.24485	8.2602	8.28856	8.29141	8.023	8.53435	8.2068	7.93874	8.20039	8.26049	8.41775	8.29137	8.61322	8.34068	8.36326	8.38536	8.42678	8.19678	8.25642	8.6318	8.46848	8.09815	8.07793	8.098	8.12073	8.08691	8.18834
POLR2D	5.40617	5.95656	5.36549	5.41851	5.85298	5.81894	5.6589	5.55409	5.49042	6.30739	5.88613	6.3329	6.10363	5.74726	5.63096	5.88632	5.87951	5.99755	6.37204	5.56828	5.65507	5.58639	5.29075	5.31658	5.47659	6.80005	6.94509	7.04595	6.36471	5.32726	6.94105	6.59806	6.91411	6.38922	5.24699	5.38514
POLR2E	8.16928	8.94969	8.34697	8.60806	8.26241	8.55482	8.78337	8.2789	8.53576	8.81763	8.81593	8.71709	8.43979	8.60793	8.32477	8.0122	8.28793	8.09766	7.97003	8.32324	8.24586	8.11931	8.2687	8.47399	8.14346	8.55619	8.81829	8.75677	8.11864	7.92927	9.56316	9.11919	9.39357	9.4439	7.88615	8.30126
POLR2F	7.52369	8.07773	7.72317	7.35315	7.29503	7.47505	7.42844	7.50583	7.68506	8.55274	7.8197	8.43361	8.17787	7.37154	7.76082	8.05267	7.7737	8.02447	8.08995	7.25053	7.64083	7.5877	7.51652	7.50759	7.39387	8.17073	8.26856	8.47083	8.01271	7.3511	8.74688	8.32127	8.6175	8.45595	7.45229	7.46148
POLR2G	9.18869	9.6592	9.27979	9.15023	8.69979	8.91021	9.15323	9.18878	9.24494	10.0303	9.50125	10.0018	9.7223	9.10791	9.20707	10.0337	9.679	9.97735	9.99467	8.93489	9.60397	9.21456	9.22289	9.03056	9.03765	9.59433	9.76421	10.0348	9.00555	9.16919	10.5678	10.2966	10.4649	10.3232	9.01603	9.19124
POLR2H	8.51894	8.76234	8.3206	8.21143	8.30933	8.38856	8.19857	8.3701	8.29395	9.51279	8.48493	9.16875	8.97732	8.38275	8.21658	9.34958	9.11971	9.46689	9.62106	8.29241	8.61706	8.32857	8.12372	8.15654	8.31249	10.1742	9.95073	9.98889	9.99043	8.47864	10.2503	9.93436	10.2036	9.98081	8.46639	8.35174
POLR2I	8.34297	9.22489	8.49091	8.26336	8.08126	8.34727	8.14347	8.58157	8.37317	9.68048	8.7245	9.44604	9.61719	8.04061	8.38101	8.75308	8.67507	8.77602	8.79007	8.19023	8.29771	8.25198	8.39017	8.42175	8.33623	9.82609	9.50029	9.31123	9.82971	8.51377	9.01952	8.75721	8.8807	8.99844	8.4206	8.46337
POLR2J	9.21861	9.61243	9.19651	9.16407	8.95458	9.25087	9.12462	9.37763	9.19592	10.0475	9.64414	10.1777	10.0844	9.10136	9.29807	9.72379	9.54251	9.75551	9.62261	9.19335	9.17829	9.21348	9.01821	9.39901	9.0801	10.0824	9.97641	9.62466	9.94964	9.23428	9.95992	9.83987	9.94987	9.88104	9.04307	9.15035
POLR2K	7.88718	8.34633	8.00574	8.20674	7.93483	7.98459	7.90566	8.30744	8.22578	8.87492	8.61562	8.81014	8.73228	8.01301	8.03166	8.51639	8.46503	8.58334	8.57535	8.41728	8.21035	8.26938	8.1701	8.24765	7.99003	9.07397	9.14878	9.12481	8.61818	7.90987	9.66119	9.51232	9.64104	9.56808	8.03913	8.04834
POLR2L	7.59739	8.482	7.83648	8.02186	7.55142	7.99454	7.742	8.12084	8.07466	8.00226	8.07783	8.05409	7.92151	7.67825	8.02358	7.58146	7.63967	7.40189	7.44534	7.73752	7.93863	8.02258	7.61085	7.88417	7.82236	7.69744	7.72057	7.76687	7.6171	7.51179	8.24575	8.17816	8.31243	7.78479	7.72871	7.86194
POLR3A	6.57098	6.56044	6.52007	6.51167	6.0488	6.27803	6.49887	6.61198	6.54912	6.48929	6.18376	6.35626	6.33237	6.24603	6.51508	5.91487	6.06183	5.85885	6.06448	6.51142	6.60503	6.48069	6.53582	6.5156	6.47503	6.80511	6.73363	6.7123	6.60756	6.51407	6.29699	6.32384	6.40355	6.35409	6.50011	6.35165
POLR3B	6.97058	7.18542	6.56197	6.87566	6.49373	6.79153	6.60861	7.2786	7.11526	7.75462	6.79662	7.40235	7.25107	6.71799	7.02608	6.17551	6.59311	5.90112	6.67113	6.98394	7.21256	7.0005	6.69934	6.74648	6.93496	7.35574	7.56285	7.64266	6.77219	6.65361	7.48518	7.17989	7.49211	7.20757	6.90436	6.63199
POLR3C	6.17641	6.57619	6.38354	6.3875	6.05589	6.13776	6.44124	6.29804	6.42772	6.77176	6.33913	6.64543	6.50282	6.4845	6.34151	6.24267	6.21044	6.18557	6.34188	6.79032	6.29884	6.49301	6.3679	6.35854	6.38009	7.29369	6.78321	6.6928	7.07574	6.3152	6.51476	6.28608	6.58602	6.54553	6.06137	6.25877
POLR3D	6.22671	5.99329	5.84135	5.90514	6.21114	6.31594	6.59799	6.28874	5.92209	6.4299	6.63409	6.33252	6.56502	6.57513	6.17163	6.51102	6.52173	6.51011	6.5677	6.0071	6.51353	6.05853	5.90834	5.92651	6.11511	6.40013	6.31304	6.327	6.58346	5.34329	7.22291	7.18637	7.14297	7.38864	6.19126	5.85204
POLR3F	5.65809	5.85154	5.97487	5.78558	5.41478	5.40527	5.49953	5.84478	5.70969	5.85803	5.40167	5.97967	5.5197	5.69916	5.59174	5.33022	5.57409	5.57361	5.47838	6.05696	5.72227	5.80297	5.62797	5.70285	5.60631	5.65944	5.594	5.53834	5.07266	5.54941	5.47281	5.76853	5.76907	5.78832	5.4354	5.38876
POLR3G	4.29065	4.11696	3.57417	3.83883	4.10509	3.86518	3.97659	4.0871	4.12639	5.33936	4.35738	4.87608	4.63601	3.62098	4.4569	4.26574	4.15649	4.20634	4.57544	4.14489	4.22444	4.39474	3.63783	3.99058	3.95394	5.3656	5.41483	5.73825	4.85851	4.05586	5.55988	5.36515	5.7395	5.8555	4.18956	3.68088
POLR3H	7.0486	7.31564	6.81388	6.99779	6.99038	7.38333	7.01337	7.44196	7.14215	7.03017	7.10365	7.15594	7.20354	6.91379	7.42234	7.1804	7.20809	7.06886	7.12733	7.50301	7.18839	7.32893	7.00046	7.07743	7.36446	7.19229	7.23259	7.34514	7.25594	6.97782	7.15995	7.06054	7.22003	6.95246	7.22053	7.10483
POLR3K	6.72497	7.47713	6.78928	6.85349	6.42101	6.66412	6.50269	6.99031	6.96178	8.34937	7.03948	7.81648	7.26994	6.68009	6.97664	7.04341	6.79838	6.70865	6.92375	6.67927	6.86717	6.89193	6.82981	6.92749	6.67425	7.83853	7.8016	8.14601	7.55954	6.6544	8.1534	7.47033	8.07055	7.39074	6.51864	6.92609
OR7E14P	4.2221	5.69591	4.14419	4.00452	4.46648	4.23568	3.82851	4.42811	3.98011	5.60841	4.34398	4.88861	4.06952	3.74169	4.35761	4.64709	4.93066	4.0869	4.83282	3.5793	3.96178	4.1508	3.86963	4.35444	4.20133	3.92633	4.19345	4.23142	3.33586	3.55381	5.3763	4.83282	4.9976	3.79737	4.14527	4.32154
KIF21A	5.27979	5.88685	5.92909	5.22433	5.60818	5.00204	4.33298	5.41856	4.96959	6.9159	5.65446	6.88462	6.84857	5.36188	5.32223	6.34164	6.40184	7.04079	6.6339	5.31059	4.58795	5.15674	5.56294	5.07772	5.93323	6.46656	6.6366	6.33125	5.92469	5.84373	7.77904	7.51709	7.85946	7.68384	5.699	5.31596
KIF21B	5.69728	5.39082	5.41664	6.13703	6.50292	5.96529	5.87143	6.09472	5.64722	5.34529	6.33871	5.57263	5.8464	6.04176	5.80725	5.73338	6.06854	5.33359	5.97796	5.7165	6.37749	6.09122	6.14295	5.89047	6.18897	5.29946	5.55943	5.52115	5.47633	6.5945	5.00376	4.85834	4.462	4.84262	5.84716	6.07751
SFMBT1	5.83507	6.20648	6.01108	6.02332	6.11984	6.19395	6.072	6.32789	5.84115	6.50473	6.40563	6.62217	6.49282	6.42437	6.02724	6.02828	6.23651	6.08665	6.24123	5.96234	6.26303	6.11477	5.8456	5.9079	6.19201	6.26315	6.70527	6.56886	6.00852	6.01609	6.82182	6.3948	6.64246	6.46998	6.24056	6.10975
KIF20A	3.90279	4.29176	3.78538	3.83928	3.86134	3.84104	4.0214	4.92962	3.8636	7.25588	6.12553	6.94912	6.68146	4.26277	4.25656	6.76371	6.62039	6.57462	7.14847	3.82182	6.22554	4.03819	3.92585	4.48677	4.07952	7.55574	7.31435	7.22183	6.78289	3.55068	8.40129	7.75723	8.31262	7.55444	4.04557	4.15133
KIF20B	4.83025	4.97505	4.60402	4.70928	4.60455	4.61088	4.71227	5.16004	4.61518	5.84908	5.47695	5.60761	5.60876	4.83062	4.86045	5.24114	5.40472	4.99107	5.48728	4.85958	5.03803	4.7317	4.9626	4.87505	4.74796	6.27433	6.22356	6.32854	5.88622	4.99981	5.89185	5.72783	5.96207	5.59538	4.70653	4.64997
KIF26A	6.54624	6.13762	6.45385	6.23391	5.76375	5.64633	6.15009	6.11188	6.34532	4.86919	5.40538	5.14724	5.64655	5.55174	5.77894	5.52152	5.42158	5.50287	5.54173	6.19534	6.40004	6.19141	6.53031	5.70237	6.20275	4.50099	4.75209	5.10739	4.74994	6.49427	4.48002	5.06524	4.69475	4.91658	6.47499	6.0551
KIF26B	4.5414	4.44523	4.27652	4.05986	4.7425	4.60795	4.65754	4.40185	4.31835	5.47596	5.7018	5.69264	5.95313	4.23325	4.44296	6.55111	5.92538	6.23642	6.26172	4.09593	5.74479	4.30604	4.31809	4.45242	4.13506	4.88274	5.05382	4.90995	5.09452	4.42853	5.22446	5.14782	4.97961	5.33288	4.33936	4.34944
OSTF1	7.7655	7.88655	7.43202	7.21192	7.5222	7.75927	7.36433	7.76527	7.70592	7.8488	7.8555	7.77501	7.85762	7.43727	7.51917	7.70742	7.71517	7.49533	7.51995	7.09861	7.98252	7.62102	7.85899	7.70489	7.24708	8.81822	8.79893	8.66009	8.69639	7.47979	8.45258	8.35248	8.26595	8.32312	7.69533	7.69001
POM121	4.83292	4.55867	4.98558	5.12304	5.1739	4.88929	5.25777	5.07744	5.19622	5.40096	4.94579	5.4167	5.33897	4.78231	5.03857	5.823	5.32688	5.84141	5.54079	5.45994	4.94187	5.20299	5.05121	5.10233	4.96701	5.03054	5.18945	5.02315	5.10004	4.94443	6.01328	5.62455	6.09792	5.87944	4.5105	4.7414
MIR3658 /// UCK2	5.67985	5.47868	5.48454	5.26736	6.31006	5.35834	6.4996	5.59109	5.62512	7.08667	6.31643	6.79025	6.83175	5.40209	5.33831	6.7973	6.84567	6.80676	7.31225	5.40379	6.34198	5.75321	5.42734	5.23463	5.35895	7.8255	7.43846	7.42364	7.4885	5.34982	7.2192	6.92818	7.28354	7.11516	5.39208	5.39894
HYLS1	5.51285	6.02968	5.61361	5.48514	5.37466	5.30073	5.4854	5.78121	5.57617	6.63799	5.96708	7.042	6.91836	5.44138	5.32784	5.88364	5.70278	5.76145	6.03468	5.1958	5.75764	5.64922	5.75774	5.47282	5.18433	7.03819	7.08383	7.04124	6.48865	5.43861	6.95778	6.50349	6.91055	6.31754	5.11367	5.29975
AK021537	5.22885	4.95367	5.37474	5.14572	5.21346	4.80146	5.08243	5.24274	4.88538	4.98499	4.70207	4.81088	4.60966	4.6761	4.85829	4.9016	5.23518	5.03105	5.10987	5.00424	4.89801	5.38023	4.70517	4.88697	5.4019	4.71386	4.96962	4.66677	4.84188	5.38121	4.87218	4.72914	4.56792	4.67352	4.98675	5.23981
TELO2	6.34406	6.48032	6.36649	6.28579	6.30748	6.48247	6.38021	6.61488	6.47216	7.1417	6.65776	6.73778	6.83091	6.28222	6.45923	7.08295	6.86204	7.03192	7.06418	6.15	6.52048	6.48572	6.38078	6.46834	6.45634	6.97997	6.9032	7.13161	6.85069	6.55165	6.7095	6.48582	6.65512	6.40584	6.29352	6.44442
KIF13A	5.30594	4.09121	5.00807	5.30934	5.00835	4.77292	5.01346	4.64002	5.10076	4.90957	3.83781	4.84456	4.5525	4.58961	4.97512	4.65776	4.33289	5.03175	4.96163	4.99158	4.20753	4.907	4.78775	5.0171	5.01037	3.78033	3.80551	3.9574	3.51098	5.55892	3.8309	3.80253	3.73557	4.19455	5.56512	4.95354
KIF13B	8.38651	7.75734	8.42347	8.1044	8.33048	8.09216	8.24345	8.33973	8.25882	7.29827	7.60235	7.12463	7.32245	7.97289	8.04605	7.71517	7.80719	7.67075	7.60327	8.18235	7.8949	8.25534	8.41906	8.02072	8.37376	6.68078	6.96725	6.75199	7.06908	8.20623	6.97972	7.01228	6.92224	6.81573	8.13179	8.29097
OR7E37P	7.20267	8.02337	7.07468	7.01774	7.47292	7.60528	7.63457	7.80865	7.40449	7.72749	7.17604	7.63811	7.69022	7.54868	7.61893	8.38625	8.08009	8.62616	8.56584	7.34761	7.45013	7.53361	7.67531	7.4287	7.54439	7.63269	7.62836	7.52334	7.44988	7.7484	8.3548	8.07765	8.36342	8.11007	7.60459	7.79102
EFTUD1	6.9743	7.05461	7.38152	7.0195	6.88736	6.97186	7.05118	7.2798	7.28534	7.66543	7.44889	7.70629	7.55389	7.39848	7.0345	7.34476	7.06796	7.4894	7.28763	7.17795	7.07339	7.13067	7.24948	7.10934	7.32109	7.17751	7.15557	7.19573	6.90457	6.96916	7.47654	7.40852	7.28188	7.84751	6.88312	6.90955
EFTUD2	8.75156	9.18089	8.97392	8.89182	8.85299	8.91384	8.69039	9.23	8.91295	9.64724	9.06958	9.58717	9.23686	9.00478	8.90988	9.18207	9.12462	9.0895	9.2459	8.80379	8.98851	8.91539	8.67796	9.2161	8.91007	9.65749	9.46306	9.50366	9.2783	8.93478	9.9744	9.70739	9.97914	9.68833	8.84736	9.02652
KIF16B	5.87657	5.66943	5.91182	6.11887	6.15664	6.11917	5.70153	5.79379	6.08273	6.15305	5.80396	6.28198	6.10456	5.93387	5.90806	6.68032	6.29926	6.96595	6.88637	6.12367	5.76775	5.95783	5.79044	5.80056	6.00333	5.54391	5.37554	5.34426	5.2906	5.86483	7.09291	7.08217	7.15075	7.71955	5.90677	5.67746
KIF18A	3.56079	3.87556	3.75213	3.22905	3.6553	3.65094	3.46244	3.68045	3.30739	4.83206	4.03856	4.87872	4.76967	3.96573	3.70972	4.41059	4.37512	4.09846	4.46147	3.39945	3.61382	3.21897	3.64783	3.72845	3.41229	5.61145	5.4137	5.01937	4.78561	3.07876	6.00522	5.68427	6.29861	5.38603	3.33761	3.25132
KIF18B	4.3798	4.56617	4.36656	4.22404	3.85066	4.08942	4.26366	5.06357	4.15221	7.18949	6.06006	7.11351	7.03155	4.60619	4.42435	6.26644	5.94678	6.04629	6.34198	4.379	5.19554	4.19917	4.10225	4.47978	3.95234	7.64252	7.38958	7.47383	7.22774	4.52981	7.67241	7.32381	7.78976	7.11982	4.18377	4.46081
IGF2-AS	4.95691	4.84868	4.64718	4.68903	4.86804	5.01095	4.63939	5.12745	4.80152	4.96234	5.15783	5.02454	5.17278	5.05579	5.03441	5.40972	5.24503	5.56423	5.30307	4.61384	4.96448	4.65373	4.77536	4.9523	4.92612	4.97648	5.45534	5.66201	5.89023	4.59723	5.32921	5.29615	5.27567	5.26047	4.85875	4.90129
HYOU1	8.43824	9.02439	8.22891	8.19075	8.29647	8.81534	8.67906	8.86471	8.22612	9.89036	9.40612	9.697	9.75996	8.28359	8.72745	10.3141	10.0294	10.5207	10.4126	8.44073	9.1444	8.77607	8.25186	8.85716	8.59665	9.32554	9.28838	9.04553	9.71771	8.3134	9.91145	9.74994	9.75102	10.0752	8.37703	8.52822
DYSF	8.68644	7.77302	7.94757	8.14558	8.08321	7.85945	9.25562	7.97248	7.96625	7.37265	7.95946	7.28126	7.45837	7.77726	7.75344	7.58402	7.97233	7.3286	7.62761	7.7118	9.3299	8.00264	8.37672	8.00176	7.84497	7.25575	7.31196	7.36393	7.89595	7.77383	7.13684	7.50359	7.1443	6.5632	8.00659	7.89207
CYP39A1	5.89935	6.20438	5.77864	5.17342	5.24692	5.61954	5.37143	5.55976	5.57832	4.66086	5.67161	4.72949	4.96188	5.30867	5.77293	5.073	5.1505	4.98246	4.79323	5.11758	5.69895	5.56595	5.82223	5.49678	5.21081	3.87695	3.89037	3.74276	4.36107	5.39455	3.92071	4.09401	3.85075	3.79706	5.60541	5.43342
CTNND1 /// TMX2-CTNND1	8.84253	8.48476	9.06373	8.87272	8.62471	8.76391	9.25679	8.53775	8.78834	8.93198	8.6647	8.54834	8.65364	8.78004	8.79355	9.54669	9.17632	9.63157	9.45623	8.70276	8.69518	8.78333	9.14693	9.13952	9.10456	8.89434	8.66703	8.50619	8.52968	8.62586	9.38326	9.10578	9.16635	9.08688	8.53295	8.59384
OSTM1	5.76374	6.69102	6.45083	6.63071	5.99573	6.53034	6.21987	7.06587	6.59978	6.36177	6.60477	6.24991	6.52031	6.50057	7.07478	6.16408	6.38919	6.37929	6.4769	6.38136	6.80336	6.69278	6.35703	7.0767	6.25311	5.67126	5.96208	5.65852	5.61517	6.06128	6.19303	6.33484	6.17176	6.37762	6.38867	6.53964
TENC1	9.4914	9.07828	8.8645	9.7314	9.13472	9.07253	9.5723	8.8516	9.30377	7.13884	7.90528	6.8607	7.46136	8.94004	9.21408	7.52575	7.81786	7.34186	7.61115	9.9253	8.7549	9.67969	9.77029	9.07857	9.66942	6.24483	6.6026	6.497	6.80292	9.83082	6.50882	7.12495	6.85187	6.50985	9.58717	9.17076
MKI67	3.96633	3.92951	4.08388	4.2499	3.93817	4.09508	4.56626	4.84819	3.74095	7.41803	6.03948	7.04776	6.45118	4.52302	4.52355	5.73682	5.61684	5.55203	5.8869	3.80233	4.94383	4.15306	4.22301	4.43507	4.17148	7.4903	7.57831	7.58887	7.10977	4.20183	6.70119	6.34197	6.86906	6.02661	4.10263	4.14675
TENM2	4.56601	4.77497	5.03952	4.03731	4.13951	3.65271	4.23973	4.64395	3.66757	7.33035	4.88003	6.7374	6.91789	4.87428	3.62557	10.484	9.221	10.5662	10.2466	4.35213	3.86137	4.19642	5.1665	3.43258	4.07525	5.93604	7.02474	7.41812	4.9063	4.06977	3.3018	3.37332	3.06535	4.07387	4.32209	3.71051
TENM3	4.23838	4.46871	4.11464	4.23747	5.0929	5.35238	4.73492	4.51539	4.49165	5.5395	5.78581	6.24614	6.31307	3.90953	4.30873	6.25701	6.05448	6.05179	6.15614	4.40317	5.75754	4.4964	4.09748	4.50213	4.56965	4.7097	5.04755	4.91364	5.51547	4.77163	4.70116	4.90741	4.67995	5.00397	4.92571	4.67073
TENM4	5.06593	5.04063	4.71686	4.72211	5.02918	5.27931	5.35448	5.23553	4.28567	7.20073	6.49413	7.25854	7.52621	4.88745	4.78965	7.3241	6.94855	7.65538	7.54787	4.20957	6.71323	5.04843	4.44236	4.54045	4.95422	7.92254	8.19739	8.65307	7.95873	5.53428	6.63764	6.91241	6.99259	6.98895	5.38576	5.26813
DHX57	5.49791	5.68947	5.66746	5.50724	5.28471	5.49811	5.63079	5.89624	5.48666	6.13488	5.87451	6.1326	6.27614	5.26684	5.31896	6.2108	5.91374	6.17776	6.31878	5.45955	5.76791	5.69935	5.5833	5.62861	5.32609	6.3936	6.17108	6.29144	6.23998	5.34908	6.4559	6.32563	6.46635	6.57758	5.52245	5.29948
DHX58	6.18322	6.71464	6.68621	6.35025	6.40419	6.429	6.19224	6.69281	6.39037	6.51406	6.26649	6.50635	6.49284	6.41196	6.75779	5.9948	5.87459	6.02171	5.87666	6.20823	6.1646	6.55864	6.56723	6.66791	6.46798	6.50086	6.52024	6.73105	6.3317	6.77482	6.43759	6.05259	6.42243	6.02319	6.40214	6.60383
DHX40	7.93679	8.17946	8.19663	8.07687	7.6527	7.8067	7.80529	7.98897	7.96022	7.92308	7.91442	8.11344	7.96141	7.90856	7.81557	8.04216	7.94449	8.22632	7.96772	7.99613	7.82001	7.80653	8.15421	7.93873	7.91579	7.90718	7.8197	7.5866	7.54791	7.93218	8.29608	8.4308	8.39412	8.7254	7.81845	7.70909
MMADHC	10.1409	10.3444	10.1819	10.2666	10.1735	10.1951	10.2509	10.2784	10.3897	10.1629	10.4438	10.4043	10.3089	10.3001	10.2013	10.7134	10.6926	10.8253	10.7701	10.3675	10.4325	10.3533	10.4012	10.3352	10.2908	10.6135	10.6895	10.761	10.5153	10.2256	10.7842	10.6798	10.7663	10.7577	10.2491	10.2023
PAXIP1	6.76572	6.49199	6.73164	6.69255	6.08097	6.45291	6.56402	6.68208	6.84861	7.12925	6.75859	7.04514	6.9354	6.4398	6.56988	6.58574	6.58854	6.62199	6.61769	6.64327	6.68242	6.79024	6.75017	6.58823	6.75039	7.29576	6.82152	6.46996	6.48537	6.40348	7.4668	7.51285	7.63582	7.50294	6.41668	6.24434
DHX30	7.44075	7.28595	7.36424	7.25268	7.35212	7.26691	7.49795	7.28839	7.38329	7.09144	6.87004	6.88933	6.91161	7.2397	7.27746	6.8004	6.85245	6.69481	6.8266	7.23799	7.08392	7.35903	7.27971	7.41023	7.42013	6.91106	6.74111	6.86991	6.72745	7.09894	7.40228	7.18684	7.36384	7.33839	7.00268	7.21009
DHX32	8.2569	8.45189	8.27966	8.07165	7.71408	7.96491	7.96592	8.43212	8.26896	8.25781	8.02635	8.14101	8.0998	7.86207	8.23054	7.87342	8.02811	7.82739	7.96333	8.03054	8.14921	8.11061	7.78991	7.79518	8.05216	8.41033	8.39558	8.4383	8.22987	8.06853	7.71364	7.78237	7.67871	7.79748	8.00004	8.34306
DHX33	6.97405	6.76072	7.16126	6.98603	7.32484	6.68788	6.89353	6.7053	7.18148	7.0569	6.63805	7.07299	6.54998	6.91378	6.80256	5.86345	6.12461	6.05684	6.32	6.48732	7.04482	6.64298	6.9018	6.79171	6.75611	7.71655	7.47817	7.39468	7.38481	6.64819	8.83427	8.31123	8.80114	8.62964	6.81654	6.42205
DHX34	6.38607	6.28073	5.92181	5.88418	6.57991	6.45522	6.1777	6.32519	5.80202	6.35616	6.07293	6.00945	6.54248	6.10526	6.1248	6.53597	6.3887	6.70861	6.64593	6.03761	5.96178	6.0911	5.96506	6.3851	6.10168	6.522	6.52999	6.63381	6.33049	6.14233	6.92638	6.75356	7.11956	6.80851	6.37665	6.20488
DHX35	5.15184	5.45093	5.29567	5.29753	4.70897	5.12598	5.52053	5.06469	5.61659	5.83528	5.25024	6.17972	5.75959	5.25582	5.16139	5.08786	4.9971	5.12773	5.35198	5.67194	5.21502	5.64444	5.4674	5.45455	5.40226	5.52164	5.25014	5.35849	5.13769	5.58587	6.19871	5.59245	6.14394	5.32768	4.93873	5.10595
DHX36	7.81167	7.64281	7.78927	7.6549	7.96311	7.5238	7.52275	7.41008	7.73089	8.00902	7.70605	7.98743	7.79533	7.82333	7.6924	8.17237	7.91521	8.47251	8.3771	7.71588	7.47913	7.42608	7.42806	7.5263	7.54751	8.50826	8.43496	8.75521	7.98374	7.46802	8.56942	8.30502	8.60635	8.51926	7.73579	7.39035
DHX37	5.93943	5.98341	5.58378	5.72976	6.02694	6.0185	5.86076	5.98506	5.83929	6.49677	6.11927	6.25926	6.25195	5.88251	5.87235	6.25675	6.23699	6.32898	6.35891	5.89285	6.06679	5.92999	5.77251	5.94217	5.84342	6.59851	6.56062	6.72925	6.47225	5.69565	6.9409	6.68264	6.93721	6.85053	5.69917	5.77156
DHX38	7.05548	6.89714	7.19062	7.11438	6.85627	6.93675	7.32723	6.82673	7.06802	6.78848	6.95106	6.71957	6.65301	7.07667	6.83671	6.82294	6.79424	6.92661	6.74651	7.06026	6.86029	6.99823	7.20262	7.21943	7.18903	6.66602	6.50616	6.6397	7.01732	7.13507	6.65568	6.58279	6.67106	6.50761	6.6704	6.84053
DHX29	8.3157	8.18583	8.59958	8.53462	8.00767	8.29063	8.23533	8.49396	8.5266	8.00369	8.08548	7.99973	7.85624	8.37759	8.42	8.06263	8.2105	7.90719	7.98632	8.71992	8.46896	8.62088	8.48591	8.44547	8.37651	8.10594	8.20269	8.2861	7.57543	8.43311	7.63556	7.84687	7.76823	7.4227	8.30626	8.21467
DHX15	9.36594	9.15743	9.3342	9.34294	9.67811	9.41359	9.42187	9.28854	9.37617	9.22829	9.23962	9.19767	9.02416	9.62265	9.23358	9.2966	9.39381	9.38397	9.31004	9.44555	9.28185	9.34217	9.31973	9.23689	9.28268	9.67916	9.56861	9.69757	9.37198	9.30301	9.4601	9.46198	9.63559	9.26069	9.49205	9.04311
DHX16	8.01499	8.03218	8.16387	8.19042	7.87082	8.05993	7.82083	8.01802	8.0634	8.1754	7.73488	8.20414	8.0284	8.18465	7.93197	7.88075	7.73843	7.80092	7.95852	8.10868	7.78562	8.11072	8.06211	8.01687	8.13943	8.5528	7.97368	7.70855	8.31396	8.12143	8.59952	8.2857	8.44615	8.30002	8.00592	7.99796
TMEM190	6.73852	8.48463	8.11192	6.19341	7.48709	6.27287	5.35728	6.79004	5.03809	5.63005	6.54523	5.40075	5.6242	7.6253	5.80945	5.0722	7.39796	5.2423	5.13707	5.23388	6.3293	4.8587	5.45555	7.78539	7.64796	5.11116	5.34398	5.23962	5.60672	7.92291	5.69295	5.82912	5.08393	5.06687	8.97002	7.74853
TMEM192	5.58683	5.40463	5.77923	5.71091	5.05564	5.22318	5.36732	5.04413	5.70216	5.2123	5.43312	5.14725	4.93564	5.36056	5.61232	4.67541	4.71533	4.90758	4.74358	5.59061	5.49693	5.28042	5.58711	5.16057	5.19887	4.70304	4.85879	4.53279	4.46276	5.2411	4.44787	4.49811	4.24351	4.3336	5.10559	5.3508
TMEM198	5.85803	5.99081	5.71588	5.70379	5.75739	6.1995	5.93884	6.26196	5.79663	5.83974	6.14846	6.013	6.27977	5.72187	6.09043	6.51562	6.40224	6.68702	6.76769	5.75228	6.22043	5.92077	5.7451	5.94686	5.989	5.56927	5.94311	5.95637	6.26337	5.96269	7.28752	7.08248	7.10446	7.06658	6.01041	6.07584
TMEM180	6.2963	6.94647	6.09831	6.58669	5.9008	6.40532	5.86624	6.74392	6.4505	6.66653	6.13403	5.99997	5.93307	6.30808	6.87388	5.4067	5.6608	5.2404	5.54302	6.43611	6.40427	6.8231	5.86676	6.31869	6.39714	6.0777	6.2434	6.35897	5.79374	6.04504	5.81469	5.95823	5.89493	5.57266	6.11113	6.49539
TMEM181	7.86715	7.60158	8.03415	8.01848	7.70904	7.75439	8.22625	7.51857	7.7457	7.81098	7.58528	7.85388	7.62158	7.83244	7.78846	8.20806	8.05377	8.18843	8.19036	8.20827	8.03996	7.88909	7.89976	7.90886	8.06357	7.80979	8.21667	8.33369	7.06431	7.78885	8.00913	8.0197	8.06008	8.25528	7.74161	7.76878
TMEM182	3.78869	4.2826	3.75522	3.74493	3.54737	3.6353	3.59732	4.02965	4.12197	4.6277	4.02354	4.25413	4.27892	3.43761	3.88256	4.91179	4.61545	5.23424	5.07256	3.66583	4.22796	3.76447	3.58368	3.81072	3.79386	5.37678	5.15973	5.299	4.797	3.86888	5.17532	4.88084	5.2405	5.16737	3.97898	3.66215
TMEM186	6.12345	6.98665	6.61716	6.46397	5.99614	6.37662	6.05317	6.53822	6.52189	7.11255	6.61165	7.0524	6.88051	6.19045	6.14021	6.5951	6.51435	6.83418	6.8665	6.37568	6.56519	6.47178	6.56141	6.63549	6.04432	7.33618	7.51599	7.65648	7.2601	6.38809	7.13805	6.71697	6.86949	6.97117	6.00156	6.23263
TMEM187	6.74538	7.43573	7.04717	7.11197	6.41763	6.73606	6.08134	6.91281	6.66622	7.09289	6.8673	6.99814	6.80921	6.85096	6.98734	6.24152	6.47338	6.3312	6.40043	6.83263	6.99722	7.00779	7.18086	6.88614	6.67279	6.7605	6.74413	6.74221	6.57247	7.00112	7.13838	7.15464	7.18734	7.1393	6.74156	7.10637
GPRASP1	7.53625	6.55477	7.30713	7.38829	7.28439	6.79683	6.94958	6.48602	7.41314	5.47262	5.83791	5.82423	5.96632	6.88557	6.30506	4.7962	5.02063	4.83281	4.81797	7.61511	6.50089	7.22516	7.43351	6.29828	7.22827	4.65714	4.50278	4.36387	4.21546	7.96459	5.66357	6.0081	5.49368	5.80683	7.78704	6.59825
TMEM171	3.49438	4.04349	3.42457	3.45658	3.50731	3.59143	3.56069	3.89666	3.77283	5.6262	4.28046	4.89361	4.99318	3.65741	3.53081	6.3458	5.50901	6.50832	6.31411	3.60661	3.53512	3.64217	3.5179	3.65919	3.66252	5.34189	5.12158	4.94464	5.16314	3.59374	4.42741	4.19895	4.37166	4.36734	3.7263	3.61018
TMEM173	8.72324	9.19732	8.8918	9.01608	8.98438	8.89465	9.39113	8.82758	8.16759	7.99726	8.7505	7.79275	8.04807	9.27796	8.9983	8.35063	8.67005	8.32807	8.2993	8.81322	8.56627	8.84206	8.84699	9.41995	9.10748	8.02462	7.81502	7.80588	8.32165	8.8402	6.745	7.34822	6.87522	7.06008	9.10871	9.18549
TMEM174	4.95912	5.19238	5.05459	4.9618	5.35386	5.32758	5.2392	5.60928	5.03657	5.51314	5.42539	5.43675	5.37315	5.40112	5.24232	5.41605	5.53775	5.43294	5.43994	5.01895	5.4279	5.0244	5.31699	5.34985	5.05734	5.47267	5.31943	5.41185	5.59766	5.4479	5.35545	5.29903	5.18685	5.35659	5.1711	5.3516
TMEM175	6.47457	6.74649	6.60624	6.64824	6.37651	6.80501	6.4134	6.58794	6.59358	6.17623	6.33189	6.14399	6.44545	6.45848	6.65125	6.64317	6.70226	6.70795	6.62804	6.47928	6.54034	6.40403	6.44925	6.64789	6.61319	6.46714	6.55617	6.71904	6.4792	6.4289	5.55773	5.80297	5.76331	5.63026	6.30804	6.63934
TMEM160	6.45254	6.85443	6.43914	6.69433	6.2547	6.32251	6.34403	6.0805	6.62472	6.65437	6.24714	6.35201	6.00111	6.40244	6.30351	5.94103	5.86922	5.83374	5.64927	6.02768	6.09444	6.16306	6.28137	6.26493	6.22902	6.18542	6.52692	6.46006	5.88513	5.68993	6.72785	6.15717	6.48909	6.28926	5.94257	6.22055
TMEM163	7.59175	8.26508	7.31536	7.83602	8.04771	8.61399	7.80061	8.48232	7.79302	6.5309	7.82708	5.66299	5.94346	7.32277	8.23728	5.89104	7.07205	5.23236	6.01903	7.95745	8.03958	8.25012	7.28524	8.36625	7.94334	5.47374	5.5708	5.17964	5.54271	7.61272	5.14398	5.60246	5.27571	4.10419	7.25259	7.89647
TMEM165	8.78136	8.7629	8.69912	8.73889	9.44168	8.87704	9.28494	8.821	8.97887	8.85136	9.20361	8.74611	8.53232	9.24143	9.10041	9.58507	9.62354	9.59783	9.56413	9.24896	9.19559	9.09623	8.42599	9.07749	8.88063	9.43913	9.25431	9.19792	9.39182	8.53889	8.70508	8.78427	8.73398	8.68833	9.45747	8.8755
TMEM168	6.87324	6.81016	6.99922	7.02345	6.7438	6.73428	6.95562	6.70056	6.90446	5.86737	6.20905	5.93061	5.89547	6.84568	6.93765	6.35597	6.60784	6.74403	6.74741	7.10023	6.87441	6.98754	6.99253	7.11008	6.9882	7.05103	6.78049	6.50468	6.37775	6.9159	6.53448	6.743	6.84486	6.74586	6.76189	6.85859
TMEM154	5.50253	5.83758	5.40961	5.43491	6.14242	5.88384	5.09599	5.85155	5.10674	6.84819	6.4904	6.71043	7.06459	5.58415	5.25631	6.74828	6.51375	6.13296	6.47699	5.30514	5.79549	5.50921	5.33413	5.43564	5.38432	6.43546	6.39042	6.73813	6.40446	5.56457	7.48625	7.35473	7.47676	6.46543	5.98113	5.77768
TMEM158	6.05975	5.7496	5.35942	5.15319	7.16773	6.4666	6.5368	5.9552	5.88428	9.17662	7.79306	8.82054	8.5931	5.60808	5.97191	8.7005	7.66067	8.96576	8.50279	4.91112	7.85273	5.21362	5.26601	5.74639	5.71355	7.801	7.76435	8.02576	7.93969	5.49512	7.31731	7.8242	7.73805	8.8365	6.61401	5.04494
TMEM159	6.81025	7.25586	6.83064	6.55757	6.26386	6.6084	6.57262	6.12079	6.81845	7.29223	6.78527	7.21141	6.88719	6.24393	6.50987	8.40816	7.73983	8.37817	8.09115	6.61579	6.42633	6.70474	6.86861	6.42535	6.41287	8.20685	7.87235	7.67287	7.81423	6.42748	6.78014	6.83098	6.75311	6.68206	6.45088	6.62411
MMACHC	4.8383	5.46684	4.39289	4.60649	4.29939	4.68722	4.45267	5.26764	4.64968	5.98129	5.24532	5.73673	5.61444	4.67581	4.78751	4.86089	4.8062	4.75902	5.18187	4.84665	5.01541	5.01005	4.88579	4.8358	4.87212	6.02204	6.28409	6.41288	5.58468	4.83138	6.72419	6.34219	6.74769	6.43964	4.67016	4.69024
TMEM140	8.03999	8.2848	8.50367	8.7117	7.06693	7.62611	7.96248	8.07447	8.43633	7.26833	7.84576	7.59788	7.63782	8.08653	8.00183	7.04951	7.04503	6.59404	6.94807	7.87235	7.87964	8.03677	8.93817	8.08248	7.8473	6.84899	7.3361	7.30824	7.45709	8.23439	6.8043	7.28232	6.98116	6.71319	7.73899	8.38313
TMEM141	7.28738	7.94271	7.34259	7.39933	7.17833	7.59461	7.19482	7.57045	7.44117	8.16172	7.40404	7.45352	7.49999	7.14509	7.46598	7.73491	7.49907	7.67632	7.69742	7.15324	7.26134	7.36204	7.30998	7.3718	7.42394	8.0793	8.27942	8.38748	7.74457	6.88217	8.13035	7.88322	7.90928	7.82155	7.23188	7.42149
TMEM143	6.70646	7.13387	6.73893	6.58826	6.42785	6.5547	6.4359	6.88546	6.73769	6.84835	6.455	6.70982	6.63442	6.71191	7.00187	6.37955	6.33467	6.34968	6.54906	6.42493	6.6099	6.69178	6.87452	6.71228	6.57057	6.76031	6.75611	6.75898	6.96297	6.95245	6.23913	6.24398	6.48714	6.37727	6.35395	6.84584
TMEM144	6.5132	6.80452	6.34644	6.31092	5.88249	6.54022	6.34014	6.92075	6.71116	6.95929	6.86159	6.5976	6.44474	6.31986	6.81785	6.03331	6.33123	6.05864	6.20784	6.16431	7.29067	6.26093	6.04234	6.56788	6.49883	6.29188	6.22605	6.16142	6.05167	6.54547	6.8527	6.4709	6.58936	6.56663	6.47395	6.60667
TMEM147	8.29716	8.85386	8.48424	8.51224	8.27905	8.79764	8.42658	8.90417	8.47002	9.60597	9.1041	9.31414	9.38786	8.46276	8.55166	9.19353	9.00202	9.19149	9.222	8.18416	8.81244	8.43432	8.40258	8.68871	8.43012	9.62326	9.34641	9.30574	9.59823	8.2979	9.22687	9.0447	9.05111	9.12838	8.33324	8.58259
TMEM14A	8.06314	8.80971	8.33312	7.91283	7.76376	7.8603	7.80249	7.57834	8.21705	9.834	8.67727	9.73511	9.31612	7.95812	7.86115	9.17504	9.00935	9.47185	9.35284	7.89007	8.06505	8.01594	8.03669	7.63158	7.8839	9.95583	10.2544	10.148	9.15209	7.78381	11.0099	10.7428	10.9297	10.444	8.09543	7.87398
TMEM14C	9.70406	10.0307	9.83153	9.74838	9.29316	9.70841	9.66553	9.90275	9.88641	10.2848	9.95128	10.3642	10.1593	9.69624	9.81034	9.77946	9.7308	9.7964	9.76558	9.8353	9.7274	9.87209	9.6034	9.7889	9.45509	9.90424	9.8473	9.45081	9.7482	9.76837	9.90532	9.98706	9.83746	9.97508	9.74851	9.73106
TMEM130	5.69827	4.30727	4.90635	4.65362	5.5615	5.12563	6.74861	5.2781	5.19459	3.80255	4.85791	4.63051	4.94476	5.35128	4.608	4.01033	3.71873	3.96171	3.45439	4.49784	4.74254	5.30376	3.74588	5.44691	5.1472	3.74248	3.96413	4.30934	4.53097	4.59982	3.71967	3.52583	3.52371	3.68867	4.00306	5.67902
TMEM131	8.5568	8.63853	8.73711	8.69944	8.50397	8.70016	8.44277	8.89841	8.59437	8.79951	8.76273	8.81274	8.75631	8.65027	8.50889	9.11811	8.96327	9.14708	8.94185	8.52356	8.75321	8.58374	8.69926	8.55483	8.68091	8.50646	8.49825	8.54846	8.52064	8.64494	8.38095	8.5742	8.55996	8.52137	8.77091	8.61692
TMEM133	6.95408	6.32794	6.85758	7.02755	6.7598	6.00203	7.00147	6.55731	6.82181	5.99938	5.85472	5.85045	6.09542	6.46888	6.34153	5.64415	5.67178	5.97874	6.06428	6.35566	6.74008	6.52019	7.12863	6.03079	6.81141	3.78567	4.1202	3.7062	4.5128	6.82994	5.10196	5.4592	5.20817	5.50243	6.83641	6.16109
TMEM134	7.71104	8.31046	7.73874	7.61685	7.53033	7.80173	7.45447	7.90341	7.85131	8.64974	8.03001	8.24852	8.12624	7.48995	7.76336	8.96227	8.67143	9.30246	8.89174	7.49347	7.81002	7.57725	7.6572	7.74571	7.59353	8.21519	8.25454	8.29621	7.84111	7.48993	8.47175	8.37202	8.37444	8.6895	7.53099	7.66365
TMEM135	7.86542	7.40662	7.58286	7.63656	7.90024	7.59871	7.79801	7.38845	7.73164	7.60952	7.43292	7.39585	7.19584	7.8437	7.74348	6.78204	7.12552	7.07686	7.14561	7.33953	7.86516	7.72362	7.91305	7.43301	7.67674	7.79531	7.98703	8.22201	6.94865	7.47117	7.49034	7.47054	7.47967	7.53103	7.67645	7.33728
TMEM136	5.53152	5.24294	5.15354	5.05844	5.26134	5.27922	5.43597	4.99681	5.51642	5.76915	5.40905	5.70901	5.39624	5.07435	5.06101	5.66685	5.557	6.19432	5.93962	4.94327	5.31337	5.36138	5.31713	5.10567	5.07903	5.23563	5.13423	5.02529	5.23371	5.09882	5.29469	5.32356	5.17228	5.49922	5.06586	5.00854
TMEM138	7.85553	8.10811	7.81977	7.79719	7.58276	8.03461	7.81914	8.28918	8.00615	8.50665	8.12567	8.64197	8.60608	7.85314	8.0611	8.50255	8.30863	8.53709	8.85829	7.80944	8.76994	7.88812	7.7733	8.0206	8.03094	8.01386	8.24278	8.46591	7.63731	8.42519	7.88075	7.76765	7.89611	7.67418	7.92928	8.10367
TMEM139	7.08691	7.48842	7.53837	7.42798	5.26303	6.41239	6.53321	7.07242	7.47542	4.93083	5.31513	4.82136	4.66035	7.0791	7.27921	4.29904	4.73707	3.97731	4.41138	7.23665	5.54181	7.30419	7.57493	7.1103	7.12753	4.04182	3.96029	4.14222	4.0436	6.38529	4.51571	4.46031	4.40595	4.15048	5.68441	6.9333
TMEM121	4.63409	4.77937	4.24035	4.26058	4.17486	4.4182	4.62762	4.48956	4.23956	4.83308	4.53071	4.53762	5.01244	4.28489	4.04035	4.98952	4.98493	5.17525	4.66401	3.94623	5.11017	4.26484	4.64363	4.24689	4.38923	4.71246	5.04913	4.8591	5.32993	4.46111	4.67388	4.63327	4.59467	4.77481	4.58563	4.34006
TMEM123	10.1752	10.0167	10.1088	9.94407	9.75926	9.78719	9.73749	9.9669	10.1079	10.9924	10.4697	10.7342	10.7209	9.80762	9.91504	10.5552	10.3867	10.6889	10.5638	10.0006	10.0185	10.0367	10.3322	10.0985	9.97859	10.2395	10.1716	10.1018	9.99061	10.0295	10.9944	11.247	11.0321	11.3537	9.99337	9.92642
TMEM125	10.2729	10.58	10.4564	10.1634	8.90367	9.94629	9.5296	10.006	10.0312	6.70499	8.56538	5.03068	5.31793	9.48403	10.2822	6.48719	7.70027	6.25492	6.8961	9.87377	9.27836	10.2483	10.2205	10.4964	10.3756	5.50233	5.70289	5.72768	5.8597	9.63678	6.46434	6.86175	6.49299	5.15337	9.07613	9.80057
TMEM127	7.99782	8.2161	8.10924	8.07112	8.03274	8.12708	8.08817	8.30043	8.12639	7.80439	7.7241	7.58755	7.58413	8.06795	8.06791	7.94921	7.85508	8.00377	8.04081	7.85592	8.19307	8.05848	8.00809	8.19264	7.98822	7.74493	7.82493	7.8494	7.61185	7.9837	7.33931	7.5506	7.37797	7.34759	7.95481	8.21653
TMEM128	7.9819	8.5558	8.32137	8.31986	7.55062	8.09699	7.68038	7.89749	8.33717	7.39187	7.66492	7.35021	7.38325	8.17357	7.95079	7.73466	7.48542	8.02202	7.71747	8.26532	8.05406	8.23871	8.35444	8.23709	7.9618	7.92398	7.97736	8.14047	7.0681	8.01884	7.34647	7.34556	7.29723	7.54012	7.89698	8.11679
TMEM129	7.05194	7.12522	6.99683	7.08593	6.54653	6.91505	7.03139	7.06539	7.23716	6.99158	7.01424	6.86408	6.8995	6.61693	7.11284	6.97193	6.91663	7.10324	6.99946	7.07197	6.92556	7.09312	7.23209	7.17262	7.13739	7.16957	7.06297	7.04058	7.03574	6.82033	6.60482	6.6167	6.51015	6.4846	6.53355	6.79413
TMEM115	7.22993	7.50009	7.31328	7.36469	6.84948	7.17854	7.37576	7.40076	7.37138	6.98381	7.1696	6.96924	7.10234	7.00329	7.23529	6.8982	7.01583	6.87586	7.0684	7.11629	7.05414	7.23822	7.50378	7.46216	7.35315	6.88571	6.87043	6.88555	6.89791	7.08492	6.88629	6.8554	6.94518	6.86443	6.8092	7.22504
TMEM116	7.26676	7.60314	7.38992	7.33738	6.89627	7.35019	6.7771	7.16067	7.44139	7.23867	7.03763	7.30617	6.9686	6.95709	7.54411	5.71627	6.69283	6.7522	6.33576	7.19132	6.97951	7.57215	7.14297	7.12022	7.35548	7.35845	7.50136	7.82667	6.38663	7.24681	6.82056	6.95792	7.06089	7.0504	7.01853	7.28272
TMEM117	5.13562	5.00467	4.73457	5.2008	5.27125	5.14318	5.38145	5.31295	5.34456	7.88442	6.55552	7.86494	7.75986	5.43931	4.78912	7.23254	6.86056	7.73183	7.20429	4.84746	5.91644	5.17007	5.06229	5.26553	5.05061	7.58118	7.37657	7.39294	7.34005	5.45382	7.15692	7.22827	7.04823	7.58992	5.19054	5.4175
TMEM119	7.4327	7.36459	6.78116	7.49352	7.65075	7.23113	8.96331	7.5808	7.38995	7.30051	8.48258	7.6646	8.37651	7.86372	7.18939	7.43009	7.81343	6.23201	7.31003	7.55106	8.36761	7.61007	6.51071	7.58692	7.42162	5.141	6.03667	5.63563	6.38592	7.31396	5.38908	6.43108	5.86693	5.55113	7.05738	7.70895
TMEM100	9.41253	10.5843	10.8973	11.5676	9.24303	10.8198	8.0464	10.093	10.9334	5.31082	6.7823	4.34659	4.51267	9.75093	11.1827	5.26939	5.60163	4.40316	5.26112	10.8981	8.35927	10.7529	11.735	11.0069	10.6077	3.2659	3.75329	3.60763	3.69503	9.32785	4.81679	5.43194	5.2626	4.08956	8.82856	10.4834
TMEM101	6.74394	7.24125	6.91883	6.63301	5.88289	6.45969	6.56765	6.71662	6.64288	6.91066	6.70985	6.61125	6.62819	6.31103	6.79604	7.11205	6.92043	7.15852	6.96727	6.50056	6.52207	6.7675	6.86183	6.71253	6.47304	7.10396	7.00449	6.81389	6.73548	6.57021	7.54804	7.33238	7.45584	7.48501	6.42502	6.48786
TMEM102	4.71591	5.6423	4.93624	4.73052	4.63413	4.97913	4.61604	5.19263	4.94691	5.03218	5.16453	5.07716	5.07365	4.94926	4.62905	5.47412	5.21388	5.18315	5.27223	4.62953	4.79323	4.66493	4.91551	5.26063	4.90704	5.36251	5.49047	5.38801	5.47074	4.57536	6.20309	5.74743	5.97232	6.14926	4.55454	5.12046
TMEM104	6.24749	6.72772	6.50104	6.61603	6.45002	6.80027	6.21446	6.83275	6.65583	6.4763	6.42759	6.50336	6.55238	6.41923	6.87134	6.05196	6.00119	6.12841	6.24468	5.59947	6.51111	6.41882	6.2055	6.94229	6.39657	6.71961	6.76918	6.79675	6.3997	6.48764	6.9176	6.75875	6.84627	6.68035	6.48537	6.62355
TMEM105	6.17914	6.30325	6.15087	6.11943	6.35096	6.21592	6.09613	6.42409	6.06872	6.5635	6.4559	6.53777	6.46059	6.28814	6.44744	6.39389	6.62612	6.62166	6.46478	6.02044	6.35863	6.12022	6.20782	6.38263	6.19822	6.37145	6.46885	6.49588	6.67162	6.26288	6.35779	6.46732	6.51393	6.4517	6.12761	6.24571
TMEM107	6.26452	7.15022	6.69415	6.20362	5.82998	5.91542	5.81881	6.12207	6.37986	6.71374	5.67622	6.17272	6.16714	5.76401	6.14139	6.30712	6.05632	6.5655	6.28611	5.67004	6.00776	5.7231	6.53004	5.80308	5.94761	5.35666	5.31899	5.25094	5.36397	6.08509	6.75814	6.76167	6.79788	7.03875	6.35705	6.03431
TMEM108	7.00846	6.94436	7.00834	7.1984	7.2176	6.48697	6.77151	6.54599	7.29847	4.43853	5.61269	4.25142	4.40225	7.0008	7.00269	4.60873	5.02278	4.2724	4.94252	6.99373	6.55028	6.91158	7.84904	6.77732	6.39582	5.28928	5.04546	4.37978	4.78856	7.47988	4.97806	5.43997	5.0937	5.40174	6.73557	6.61566
TMEM109	9.09308	9.14903	9.22702	9.35595	8.86894	9.11046	9.39084	8.99684	9.40579	9.14503	9.02529	9.1206	9.24506	9.12502	9.2856	9.78732	9.60609	9.98885	9.89944	9.34816	8.78867	9.30057	9.68569	9.48906	9.34882	8.86038	9.00762	9.28426	8.93894	9.08462	8.45484	8.53797	8.58565	8.41282	8.73893	9.01634
TESK1	7.74811	7.81151	7.57897	7.71477	7.74874	7.95066	7.48783	7.8829	7.64417	7.63859	7.72551	7.73117	7.78542	7.66204	7.73555	7.58939	7.51304	7.57276	7.58229	7.46071	7.8422	7.69021	7.58764	7.56033	7.72893	7.41069	7.48228	7.23343	7.5998	7.71538	8.3004	8.18135	8.23119	8.28376	7.79078	7.6934
TESK2	6.57865	6.77082	6.44016	6.6336	6.31204	6.63504	6.53805	6.71085	6.67899	6.37907	6.45343	6.67411	6.74847	6.44258	6.66195	6.04215	6.16092	6.1694	6.10679	6.08813	6.47942	6.32987	6.68621	6.37144	6.45803	6.45951	6.68057	6.97664	5.98365	6.43941	7.7908	7.63673	7.75716	7.45877	6.44417	6.51963
STAT5A	6.88225	7.07437	6.9216	7.05096	7.98727	7.2368	7.06147	7.23847	7.10269	6.49904	6.96722	6.5255	6.56976	7.02085	7.00633	6.40951	6.77548	6.0737	6.35669	6.81007	7.10295	7.01603	7.02182	7.25998	7.01903	6.48335	6.49382	6.51799	6.52471	7.28229	5.81973	6.07613	5.74392	5.68132	7.11406	7.07161
STAT5B	5.97343	5.77588	5.91489	6.10508	6.41953	5.97345	6.21309	5.79769	5.88196	5.83633	6.00635	5.84944	5.62723	6.18079	5.96359	5.71442	5.72459	5.59779	5.72977	6.01647	5.94972	6.0021	6.23139	6.19975	6.12112	5.88423	5.7163	5.5074	5.5505	6.04122	6.00129	5.99665	6.02663	6.02616	6.05541	5.93347
TMEM260	6.94125	6.8416	7.0606	6.96028	6.30834	6.73409	6.54083	6.34284	7.00452	7.08542	6.72092	7.35448	7.01164	6.76135	6.58853	5.7775	6.28051	6.01356	6.15873	7.05299	6.83591	6.8917	7.00838	6.59218	6.74911	6.60717	6.74084	6.62066	6.15102	7.06718	6.39577	6.44181	6.51244	6.56984	6.83666	6.69068
TMEM261	7.33291	8.11438	7.63376	7.46374	6.97633	7.14563	7.2239	7.3072	7.70531	8.34249	7.19933	7.40984	7.3165	7.19763	7.49932	6.69924	6.84003	6.64515	6.79936	7.39333	7.44722	7.44222	7.60774	7.40479	7.27095	6.92088	6.80817	6.97392	6.53658	7.51134	6.60556	6.81273	6.89935	6.74298	7.23236	7.34064
TMEM262	4.69736	4.64726	4.26128	4.34175	4.63448	4.79406	4.67724	4.59922	4.38765	4.7766	4.85295	4.89234	5.05815	4.30327	4.64434	5.43141	4.84111	5.57925	4.91343	4.42337	4.40585	4.25538	4.00742	4.76207	4.613	5.31316	5.46996	5.33681	5.75795	4.41741	5.36607	5.11382	5.14593	5.37946	4.41505	4.48504
TMEM263	8.40276	7.81001	8.04769	8.0147	8.1746	8.00801	8.35202	7.7623	8.06956	8.38064	8.78113	8.80009	8.83327	8.1764	7.89306	8.41626	8.60106	8.27755	8.08707	8.00038	8.69654	7.9887	8.22898	7.8003	7.85647	8.02466	7.95371	7.58904	8.26749	7.79923	8.97053	9.06527	8.94632	9.23682	8.30883	7.90937
TMEM251	7.94146	8.42293	8.17397	7.91664	7.60523	8.43261	7.92892	8.64823	8.32321	9.24817	8.80749	9.02384	8.74123	7.96979	8.40525	7.29611	7.65112	7.40434	7.29969	8.14912	8.40192	8.17733	7.9266	8.93341	8.11311	8.58753	8.599	8.37625	8.42883	8.09742	8.15395	8.18375	8.27324	7.94909	7.8387	8.11346
TMEM254	5.80386	6.38293	6.16308	6.04248	5.67148	6.05913	5.8078	6.17606	6.14592	7.18991	6.41981	7.0885	6.83023	5.80962	6.07289	6.36985	6.3062	6.61089	6.36305	5.96953	6.04664	6.05735	5.94331	6.14328	6.18199	6.83015	6.77151	6.83323	6.727	6.1333	6.49585	6.62096	6.5493	6.80867	6.16575	6.17308
TMEM256	7.77641	8.20538	7.50697	7.44465	7.32269	7.75781	7.31115	7.76602	7.52687	8.42535	8.28609	8.38097	8.4974	7.38815	7.82558	8.13503	8.04138	8.15578	7.94375	7.50222	7.70016	7.65289	7.35335	7.52081	7.51542	7.78818	7.96797	7.7786	8.10388	7.57808	9.62384	9.45098	9.55434	9.53173	7.65118	7.69738
TMEM258	10.9323	11.4971	10.8538	10.7144	10.7022	11.1764	10.9379	11.4384	10.8908	11.6175	11.4804	11.6666	11.6957	10.8108	11.038	11.6726	11.6262	11.7642	11.7668	10.8194	11.2593	10.8847	10.8386	11.0653	10.8996	11.2586	11.4978	11.4533	11.4353	10.839	11.4639	11.4712	11.4846	11.5843	10.9317	11.0915
TMEM259	5.94	6.09759	6.04052	6.4383	6.00853	6.22202	6.85384	5.93142	6.14356	5.72236	6.18223	5.66252	5.79205	6.09989	6.05394	5.85574	6.04166	5.97167	6.07899	6.35646	5.65084	6.06807	6.06803	6.6619	6.30103	5.38653	5.3323	5.43636	5.31573	5.51128	5.40588	5.35517	5.66538	5.63521	5.17846	6.14475
TMEM241	7.59835	7.88194	7.47737	7.58225	7.71864	7.73124	7.61561	7.84058	7.2452	7.92602	7.77651	7.45771	7.85218	7.55718	7.81863	8.11664	8.07397	8.05949	8.13936	7.81177	7.48193	7.67172	7.56997	7.9169	7.8336	8.31994	8.07928	8.13129	8.21856	7.77963	8.30378	8.14896	8.17608	8.16352	7.674	7.6467
TMEM242	6.04929	6.62258	6.47485	6.37316	5.93339	6.1767	6.23955	6.30162	6.53796	6.44645	6.27698	6.47271	6.21291	6.39992	6.23523	6.46707	6.23512	6.44091	6.47199	6.17877	6.60606	6.14059	6.40085	6.5288	6.02836	6.38381	6.64222	6.91779	6.2002	6.14224	6.3692	6.08104	6.04228	6.40459	6.10491	6.36079
TMEM243	9.44641	9.50366	9.33417	9.42416	9.20164	9.74202	9.09015	9.55962	9.50692	8.361	9.54944	8.39667	8.65811	9.33273	9.58421	8.01303	8.64594	7.73463	8.11048	9.99606	9.21816	9.97143	9.5493	9.79033	9.56638	8.40689	8.49917	8.42148	8.47114	9.38735	7.7839	7.99533	7.95208	7.60836	9.19157	9.43703
TMEM245	9.59591	9.81842	9.81908	10.0033	9.25649	9.36435	9.48286	9.49409	9.91198	7.77175	8.89309	7.73894	7.63929	9.39783	9.61068	8.02169	8.32741	8.02194	8.01996	10.0581	9.09022	9.75734	9.96708	9.48939	9.81337	8.74827	8.65699	8.32597	8.47508	9.82522	7.58971	7.87736	7.75282	7.54165	9.49286	9.40017
TMEM246	6.70577	6.95023	6.86784	6.76213	5.39061	5.79289	6.39111	6.23905	7.30415	7.69209	6.10289	7.56429	6.8953	6.239	6.41903	5.73401	5.75132	6.15136	6.14068	6.89229	5.94322	6.89773	7.20417	6.43268	6.33361	8.72058	8.19844	7.73463	7.95928	6.61442	7.69415	7.61021	7.86436	7.77061	6.11194	6.42578
TMEM248	8.62915	8.78514	8.68324	8.71707	8.69248	8.77757	8.70916	8.6485	8.78651	8.78203	8.70594	8.82701	8.81077	8.58244	8.62265	8.78836	8.67288	8.75654	8.78487	8.61399	8.72567	8.74047	8.78669	8.62061	8.64755	9.85048	9.26894	8.66731	9.73038	8.54496	8.36699	8.43177	8.39822	8.44294	8.60004	8.52996
TMEM230	9.78946	10.1883	10.0581	9.87271	9.60194	9.78102	9.85202	9.8907	10.073	9.70025	9.75113	9.91359	9.57389	9.66474	9.66902	9.64032	9.64327	9.70017	9.68155	9.85808	10.0432	10.0077	9.91881	10.0188	9.79117	9.51111	9.55128	9.6135	9.62511	9.65861	9.98327	9.87065	9.9903	10.0327	9.76564	9.74482
TMEM231	6.43036	9.04613	7.89899	6.65897	7.00521	6.41618	6.55156	7.461	6.40559	6.60114	6.12417	6.00136	5.93173	6.8659	6.76997	5.72654	6.95934	5.87904	5.97452	6.33786	6.5746	6.2056	6.91553	7.15481	7.57882	5.52069	5.75724	5.51266	5.11912	7.84072	5.54731	5.77877	5.66219	5.69122	7.95928	7.56252
TMEM234	5.69987	6.1797	5.89915	5.99774	5.84655	5.98743	5.9795	6.08695	5.87309	5.99334	5.89524	5.99583	6.0256	5.98159	5.8957	6.504	6.15048	6.44801	6.42719	5.74062	6.04398	5.75944	5.73785	5.91766	5.81397	6.10267	5.94016	6.00367	6.19948	5.97373	6.47013	6.22432	6.50365	6.64687	5.83979	5.86325
TMEM237	5.84723	6.21922	5.74004	6.00365	5.97511	5.77019	5.76163	5.94244	6.35816	6.08175	5.4046	6.17536	5.99442	5.75279	5.71182	6.22589	5.95943	6.14093	6.25082	6.11206	5.65744	6.02373	6.18704	5.58115	5.92656	7.34976	6.72532	6.29706	6.92797	6.19374	6.66982	6.46993	6.49494	6.64831	6.44026	5.71747
TMEM220	6.55641	6.94153	6.55468	6.29511	6.51686	6.72867	6.76874	6.40876	6.7667	5.99901	6.5277	6.22662	6.29141	6.23313	6.43245	5.46176	5.83512	5.31554	5.32616	6.31446	6.69056	6.50544	6.12692	6.2702	6.57194	5.82022	5.91513	5.64392	6.3334	6.68108	4.86073	5.45519	4.91683	5.08016	6.19457	6.65226
TMEM222	7.91454	8.26028	7.95643	7.89637	7.71962	7.84796	8.24666	8.34905	8.02986	7.65326	7.85238	7.50201	7.94592	7.94014	8.03994	8.2082	8.02248	8.11763	8.16611	7.86468	7.83904	7.9806	8.03372	8.37782	8.20354	7.79567	7.81396	7.92484	7.87181	7.97306	7.62417	7.60144	7.59581	7.63474	7.662	8.11495
TMEM223	6.30154	6.71529	6.24943	6.2619	5.78792	6.09164	6.03351	6.4755	6.19982	6.64311	6.50629	6.55528	6.52021	5.9995	6.1831	6.93832	6.62382	7.01137	7.02189	6.09574	6.25952	6.19136	6.37543	6.36659	6.26816	6.78939	6.86335	6.80277	6.82024	6.16187	6.68356	6.58806	6.5883	6.70488	6.22277	6.17598
TMEM212	5.27878	5.4176	5.66302	4.83534	5.01768	4.76476	4.71155	5.05022	4.908	4.91353	4.78147	4.75986	4.89681	5.05903	5.13375	5.27628	5.33205	5.25622	4.98526	5.24494	4.52957	4.81686	4.92596	5.10746	5.56998	5.21272	5.1499	4.94706	5.08429	5.60868	5.07166	5.26354	4.97793	5.01237	5.62732	5.61369
TMEM213	4.15917	4.33262	4.09011	5.87297	4.04888	3.91157	3.56007	4.98743	3.63528	3.60792	3.81774	3.659	3.66171	3.60086	4.23191	3.73134	4.0515	4.0435	3.6411	4.706	4.31061	4.03617	3.91203	4.07823	3.56698	3.75456	3.92392	3.79944	4.0673	4.10241	3.67342	3.89872	4.00534	3.70846	4.64326	5.475
TMEM214	8.00734	8.41029	8.02034	7.99398	7.81716	8.19186	8.59661	8.40342	7.82796	8.33576	8.5972	8.21542	8.76558	8.31513	8.35103	8.94769	8.86356	8.88931	8.79125	8.33521	8.33189	8.34151	8.09361	8.66388	8.37117	8.6656	8.53865	8.29753	9.157	8.13	8.63982	8.47781	8.44062	8.5913	8.10558	8.3064
TMEM216	7.22385	7.76895	7.37303	7.23783	7.17676	7.43418	7.05442	7.59846	7.3628	8.30853	7.60841	8.47377	8.30862	7.18082	7.39615	7.90771	7.76531	8.11104	8.16043	7.47871	7.50193	7.3419	7.39901	7.22847	7.26176	8.27567	7.98718	7.91949	8.02306	7.34399	7.96632	7.82669	7.92364	7.81347	7.4533	7.40614
TMEM218	7.67392	8.11205	7.80273	7.64313	7.28186	7.56766	7.41408	7.67195	7.75049	7.73798	7.795	7.91736	7.83816	7.52661	7.70646	7.95682	7.85124	8.13554	8.13488	7.51344	7.9942	7.70492	7.74555	7.61382	7.64816	7.25631	7.38201	7.2383	7.51224	7.75612	7.83313	7.83247	7.92169	7.78035	7.68307	7.64938
TMEM219	7.40286	7.96426	7.73086	7.78995	6.80999	7.61989	7.62233	7.60621	7.67909	7.20916	7.21891	6.9933	7.24794	7.33115	7.49148	7.29897	7.2754	7.22994	7.35445	7.41806	7.44082	7.504	7.81624	7.91658	7.84902	6.73722	6.8558	6.83058	6.97005	7.66856	6.70416	6.62897	6.66782	6.64609	7.07754	7.62648
TMEM201	6.04664	5.80646	5.88431	5.62443	5.81775	5.81831	6.15135	5.93285	5.96532	6.89768	6.16048	6.53618	6.73269	5.74491	5.88074	6.21475	6.16646	6.22105	6.64217	5.75667	6.14795	5.76055	5.99618	5.77458	5.78814	6.93551	6.79465	7.24157	6.67479	5.73096	6.29814	6.24614	6.53673	6.11744	5.60385	5.8431
TMEM203	8.52216	9.07112	8.91051	8.87316	7.83322	8.58344	8.37814	8.92982	8.95025	9.05181	8.62179	8.61324	8.49272	8.71031	8.72295	8.50094	8.39628	8.41562	8.4484	8.89569	8.80216	8.89805	8.95833	8.83034	8.78903	9.14918	9.01672	9.22471	8.64719	8.78572	8.44908	8.44818	8.52665	8.32076	8.23509	8.71786
TMEM204	5.51507	5.66341	5.65288	5.81252	5.49936	5.6644	5.78628	5.70331	5.67556	5.59888	5.71576	5.55387	5.54169	5.82515	5.64499	5.938	5.71213	5.93961	5.57947	6.11796	5.60578	5.72214	5.78983	5.7248	5.45054	5.70587	5.95847	6.10341	6.42863	5.48543	5.74266	5.82059	5.8779	5.7622	5.3032	5.7442
MKNK1	7.7875	7.53956	7.65694	7.74818	7.64911	7.67732	7.6358	7.73262	7.68593	6.61463	6.55119	6.57119	6.72089	7.5702	7.72941	6.87908	6.93812	6.74397	7.10461	7.43264	7.60699	7.69061	7.22396	7.65898	7.51226	6.08191	6.15799	6.39696	6.13497	7.66428	7.13192	7.13275	7.2757	6.63758	8.20733	7.66208
TMEM205	8.85301	9.41608	8.87419	8.84728	8.7219	9.10041	8.90562	8.95838	8.93843	9.13912	8.83837	8.65322	8.69195	8.82829	8.92811	8.13625	8.52747	7.97128	8.19203	8.68911	8.89164	8.98756	8.65967	9.06355	8.80528	8.90166	9.07077	9.07136	8.77068	8.80784	8.81301	8.5534	8.63276	8.59068	8.74326	8.94209
TMEM206	6.40444	6.99911	6.49943	6.88332	6.02365	6.58119	6.86766	7.11885	7.03671	7.89239	7.34199	7.67639	7.3932	6.99231	6.72873	6.95652	6.76836	6.79798	7.05467	6.47528	7.53346	6.6608	6.63632	6.54777	6.35225	7.2527	7.36754	7.44281	7.07541	6.71006	7.92383	7.65539	7.84205	7.70892	6.46139	6.52318
MKNK2	10.021	10.0263	10.1511	10.2241	9.60685	10.1342	9.61712	9.94397	10.2212	9.06198	9.46249	8.6394	9.09998	9.52595	10.3728	9.79483	9.53105	9.68767	9.68595	10.3574	9.81077	10.2011	10.6345	10.0609	10.298	9.732	9.88586	10.0744	9.1682	9.86035	10.2892	10.3118	10.3409	10.3609	9.75264	9.94965
TMEM208	7.90392	8.56946	7.86168	7.99924	8.02841	8.35587	7.87549	8.27799	8.03809	8.61298	8.44491	8.49774	8.6257	8.00007	8.15916	8.7624	8.71731	8.85979	8.89203	7.74417	8.23098	8.04619	7.74574	8.16757	8.0008	8.57594	8.64419	8.54347	9.01438	7.84927	8.26973	8.26394	8.14438	8.29473	7.96286	8.04281
TMEM209	5.35607	5.67317	5.68167	5.80626	5.29667	5.48481	5.41011	5.63179	5.6207	5.77663	5.63817	5.71911	5.52189	5.38753	5.55863	5.36409	5.54668	5.61222	5.72925	5.85704	5.60727	5.68799	5.66367	5.79485	5.50994	6.74937	6.85971	6.93227	6.00464	5.56599	6.10312	6.1717	6.25179	6.39805	5.57999	5.55691
TERF1	7.7939	7.64983	7.8897	8.00054	7.60951	7.65424	7.74109	7.65047	7.94311	7.94038	7.66372	7.93906	7.92551	7.86211	7.76553	7.25079	7.40334	7.40146	7.38551	7.94489	7.85522	7.80417	8.08685	7.70972	7.77002	7.83074	7.90427	7.73444	7.23157	7.78619	8.90434	8.80261	9.00163	8.93268	7.78488	7.60869
TERF2	5.30211	5.6029	5.11173	5.28011	5.75963	5.25736	5.19208	5.28173	5.37752	5.58639	5.30077	5.28323	4.97605	5.48207	5.21554	5.15004	5.13072	5.05793	5.32031	5.16578	5.43677	5.0278	5.36783	5.03469	5.15571	5.36204	5.36574	5.40593	5.28782	5.13301	5.35232	5.25982	5.30604	5.37622	5.41096	5.24136
YTHDF1	8.96442	8.90358	8.91567	8.85559	9.06488	8.98885	8.74857	8.99479	8.98286	9.31787	8.80458	9.19892	9.08822	8.91615	8.83916	8.78847	8.89902	8.83957	8.85924	8.79081	8.96146	8.80619	8.77885	8.66089	8.73684	8.94126	8.61108	8.57263	8.76629	8.84612	9.18966	9.0043	9.12672	9.0178	8.98063	8.76422
YTHDF2	9.2006	9.31273	9.29819	9.27667	9.36837	9.39485	9.37865	9.23891	9.29377	9.2351	9.2765	9.29964	9.25577	9.51383	9.27029	9.09964	9.24249	9.26187	9.2231	9.32046	9.35686	9.27127	9.13992	9.2871	9.17166	9.32082	9.38333	9.61356	9.02953	9.18942	9.68531	9.52581	9.74369	9.37394	9.29169	9.04662
YTHDF3	7.24909	7.01063	7.34609	7.41322	7.67627	7.47242	7.56967	7.28713	7.40886	7.17304	7.22597	7.34357	7.19524	7.61229	7.28833	6.93056	7.08074	7.07156	7.26769	7.49937	7.65073	7.43817	7.38482	7.43121	7.24961	7.55945	7.37818	7.10968	6.76412	7.14938	7.90574	7.72799	7.90666	7.58261	7.35244	7.10921
MKLN1	6.63779	5.90043	6.57236	6.72334	6.47814	6.07707	6.45952	5.77974	6.6242	5.9997	6.07003	6.17176	6.04272	6.49179	6.66259	6.00571	6.00988	6.1476	6.18031	6.81083	6.24168	6.77667	6.7731	6.65058	6.57082	6.91756	7.02329	7.00451	6.33081	6.46917	6.56658	6.91273	6.993	6.94526	6.42085	6.13715
TMEM39A	6.89772	7.06993	6.79379	6.91874	7.1155	7.19571	7.18298	6.85522	6.90264	6.89957	7.12899	7.24863	7.23101	7.08578	7.20227	7.89697	7.75084	8.05413	7.9845	7.30643	7.40321	7.24539	6.99043	6.96426	6.99101	7.77548	7.61006	7.5494	7.82124	6.93782	8.10226	8.0765	8.12218	8.25769	7.10806	6.82309
TMEM39B	6.97709	6.90615	6.8662	6.78741	6.498	6.8295	6.92959	7.07214	6.89026	7.51575	7.13623	7.35137	7.38311	6.73851	6.75582	6.82213	6.93533	6.7717	7.10421	6.56801	7.1528	6.90155	7.10139	6.77269	6.6741	7.3265	7.19849	7.37515	7.4861	6.70653	7.62901	7.55891	7.62895	7.96672	6.66826	6.74884
DZIP1L	5.61179	6.33625	6.01189	5.53466	5.75449	5.35445	5.55195	5.8859	5.31044	5.36766	5.50737	5.40523	5.51517	5.63517	5.78552	5.72221	5.80155	5.78762	5.56581	5.3609	5.44456	5.31927	5.64408	5.77994	6.02672	5.61657	5.47488	5.46081	6.01871	6.06911	5.24864	5.46603	5.31944	5.79206	6.08984	6.03456
LOC100508408 /// RPS13 /// SNORD14B	12.5619	12.4852	12.4928	12.425	12.302	12.399	12.4067	12.4644	12.5132	12.5547	12.6077	12.5053	12.4637	12.4519	12.4871	12.245	12.4516	12.1652	12.3567	12.5707	12.4785	12.5368	12.4546	12.5186	12.491	12.2091	12.2794	12.3583	12.2699	12.5162	12.3607	12.4344	12.4727	12.4541	12.5072	12.498
TMEM38A	5.60394	5.8727	5.69317	6.10243	6.03448	5.86112	5.56556	5.76585	5.85928	5.559	5.29117	5.77819	5.4651	5.75157	6.30284	5.37752	5.13902	5.67861	5.62857	5.54399	5.55049	5.78267	6.10167	5.94155	5.69871	5.93636	5.90553	5.92489	6.05508	6.04225	5.44889	5.08232	5.09702	5.21962	5.85726	5.71676
TMEM38B	5.50999	5.97072	5.46919	5.63362	5.65095	5.78907	4.87488	6.04493	5.85764	6.83005	6.02793	6.65952	6.31575	5.77678	6.17213	4.64885	5.15807	4.73681	5.11379	5.44659	5.74065	5.41241	5.43143	6.05471	5.25997	7.37174	7.21595	6.85816	6.76763	5.11591	5.73939	5.85062	5.70651	5.56281	5.8636	5.77321
TMEM30A	9.28105	9.22779	9.70209	9.78367	9.81376	9.69647	9.58662	9.66094	9.70627	8.96992	9.53099	8.90132	8.92662	9.68057	9.82679	8.88713	9.05179	9.05185	8.84572	9.75498	9.67627	9.72815	9.70365	9.88908	9.61593	7.99798	8.33351	8.26089	7.97994	9.51169	9.3623	9.46429	9.22193	9.56264	9.40702	9.48012
TMEM30B	8.43696	8.39137	8.31786	8.08955	8.33547	8.617	7.66542	8.46951	8.36644	9.43264	8.55876	9.02105	8.72615	8.0516	8.3094	8.94721	8.76917	9.18897	9.03743	8.22039	7.74003	8.43272	8.31989	8.16577	8.54906	8.12309	7.80371	7.5614	7.8077	7.93052	8.05256	8.11232	8.03569	8.13619	8.10199	8.095
TMEM41A	7.19396	7.30912	7.43324	7.44417	7.02647	7.51236	7.14215	7.55094	7.53248	7.86069	7.68768	7.62502	7.49765	7.51082	7.48735	8.55491	7.91133	8.69046	8.55976	7.72041	7.73806	7.75014	7.42493	7.42919	7.39192	8.93291	8.69223	8.89878	8.34337	7.27924	8.84253	8.53623	8.66958	8.70639	7.24077	7.4436
TMEM41B	8.83834	9.01262	8.80511	8.87977	8.73095	9.00299	8.30297	8.81251	8.82021	8.3341	8.21051	8.24966	7.89138	8.59224	9.22245	7.84701	7.76801	8.0257	8.01008	8.87839	8.34344	9.01673	8.77534	9.06768	8.91317	7.93121	7.68719	7.34428	7.68262	8.68659	8.78472	8.5746	8.55406	8.65067	8.55755	8.86055
EAF1	6.5342	6.7653	6.34247	6.25972	7.36706	6.97493	6.40579	6.50673	6.38581	6.71325	6.836	6.35999	6.36146	6.59478	6.81504	6.27248	6.30551	6.34666	6.21576	6.58113	7.3129	6.45008	6.55549	6.25154	6.34865	6.17717	6.30779	6.04916	5.62117	6.02943	6.6711	6.76213	6.54166	6.77361	6.90198	6.23825
EAF2	5.65611	6.42527	4.77118	5.8563	5.5156	6.07386	5.55832	6.90475	6.18508	6.70736	6.71359	6.55881	6.71212	5.66154	5.94265	6.49772	7.04398	6.52021	6.69841	5.69479	6.40778	5.67813	5.6373	5.73815	5.75446	7.06559	7.82493	7.4858	7.87962	6.6356	8.50796	8.1525	8.38276	7.7707	6.09912	6.20353
YTHDC1	6.48515	6.268	6.46181	6.56798	6.29193	6.28351	6.25934	5.4986	6.50308	5.87768	5.81761	5.69201	5.7193	6.12233	6.16627	5.7952	5.68425	6.07793	5.74135	6.17586	5.70859	6.07757	6.51215	5.8693	6.13879	6.16291	6.35584	6.06165	5.71405	6.33293	6.22863	6.03494	6.32493	6.27575	6.38132	5.98611
YTHDC2	6.54157	6.51962	6.82747	6.5867	6.91099	6.75761	6.83355	5.51586	6.85642	6.49566	6.79693	6.53424	6.0406	7.0337	6.50646	5.95337	6.39259	6.1441	6.13138	6.72523	6.6508	6.38147	6.34744	6.07857	6.43259	6.43758	6.53206	6.45994	5.39045	6.25016	6.64881	6.39561	6.63652	6.54939	6.548	6.24795
TMEM45B	6.05059	6.6922	6.33679	5.79081	6.53008	6.29959	5.33224	5.93215	5.79132	6.83517	5.83288	5.82308	5.45001	5.6224	6.2876	7.71465	7.4722	7.90814	7.81412	5.8076	5.30042	5.49971	5.62101	6.02949	5.94212	4.37946	4.23358	4.82999	4.25324	5.65334	6.68238	6.06227	5.91448	5.24646	6.03214	6.07786
EAPP	8.74767	9.13095	8.59733	8.58944	8.15289	8.56881	8.36325	8.75274	8.74389	8.66706	8.77278	8.81237	8.78631	8.32735	8.6056	8.57741	8.73363	8.6563	8.57803	8.61287	8.55722	8.75133	8.67317	8.56527	8.68287	8.93271	8.83936	8.46017	9.04875	8.773	9.58952	9.48434	9.62372	9.4773	8.53108	8.55628
TMEM45A	7.6054	8.37693	7.71047	6.98271	7.48524	7.10342	7.79392	7.66299	7.21807	9.86507	8.53658	9.20799	9.37142	7.55561	7.19959	10.7167	10.3078	10.4101	10.4462	7.12096	8.58723	7.21305	7.69769	7.2256	7.46093	9.80132	9.04949	8.16227	8.57563	8.36953	8.07098	8.65994	8.12885	9.7715	8.68406	7.70925
EBF1	6.66257	5.61253	6.07852	6.36151	6.25324	5.84044	6.47555	5.24385	5.52435	4.96959	5.63671	4.64784	4.82364	5.85187	5.84086	4.87543	4.87725	4.86001	4.88706	5.30096	6.35016	6.02543	5.98049	5.20825	5.54323	3.91047	4.2129	4.38336	4.05383	5.81824	4.25376	4.77621	4.25631	4.38127	6.38463	6.02306
EBF4	6.08758	5.8653	5.92704	5.92574	6.06242	5.62003	6.25051	5.69363	5.84303	5.61783	5.71777	5.74156	5.9629	5.69303	5.85324	5.89661	5.96959	6.19529	5.79509	5.80152	5.86113	5.67621	6.21787	5.69427	5.75153	5.48921	5.68038	5.69336	5.70046	5.84303	5.34301	5.50644	5.38291	5.39501	5.80232	5.49974
EBI3	5.00484	4.60307	4.53273	4.64264	4.9068	4.96863	4.78932	5.18881	4.90146	6.84746	6.04782	5.83225	6.02937	5.16566	4.76095	5.90611	6.16905	5.52559	5.62709	4.76265	5.74946	4.90558	5.06274	4.81896	4.90323	5.69913	6.13845	6.16966	5.68867	5.36891	4.91481	5.27571	4.99056	4.88794	5.34842	4.71832
PRKCDBP	8.4804	8.89695	8.59519	8.5505	8.22134	8.20875	8.39667	8.3785	8.54377	8.34595	8.13631	8.25775	8.29037	8.12122	8.12644	8.28928	8.09214	7.97171	8.07507	8.2529	8.27335	8.42622	8.33635	8.10716	7.99597	6.0925	6.69873	6.36481	7.01993	8.32182	7.18202	7.98588	7.55676	8.80078	8.17751	8.50797
TMEM50A	9.13731	9.38708	9.35397	9.38568	9.16756	9.23127	9.23567	9.31384	9.4305	8.97829	9.21323	9.1138	8.98813	9.35427	9.27402	9.05796	9.04203	8.98831	8.9184	9.28528	9.24852	9.35961	9.37895	9.308	9.18248	9.03674	9.12145	9.31156	9.0007	9.06336	8.81457	8.91947	8.85456	8.93674	8.9996	9.22501
TMEM50B	8.01471	7.98527	7.87295	8.12425	7.63841	7.64809	7.90959	7.74898	7.99684	7.9715	7.7044	7.74431	7.61099	7.83477	7.84448	7.72015	7.69961	8.03866	7.85188	8.07121	7.83498	8.05296	7.91235	7.74142	8.04925	7.40844	7.56097	7.45215	7.28996	7.8266	8.3418	8.0721	8.14731	8.15459	7.81486	7.88601
BTF3L4	7.57942	7.89619	7.54951	7.45502	7.50985	7.55548	7.4314	8.04958	7.82453	7.76288	7.80489	7.93818	7.70051	7.51624	7.69501	7.59102	7.76805	7.43798	7.59916	7.65345	7.82419	7.83229	7.59306	7.7629	7.55585	8.09613	8.43022	8.74313	7.74027	7.52891	8.34831	8.00319	8.23653	7.97197	7.65564	7.69639
TMEM59L	4.77354	5.22586	4.82868	4.93066	5.19815	5.27004	5.05422	5.18445	4.80777	5.44864	5.51785	5.61206	5.34689	5.20385	5.07648	5.85505	5.70019	5.90709	5.66796	4.62592	5.11451	4.92298	5.05382	5.18482	5.06324	5.71633	5.76003	5.89312	6.32225	5.12308	5.94351	5.60109	5.62929	5.69514	5.18048	5.046
EBPL	9.63766	9.5044	9.3749	8.94526	8.8443	9.28829	9.01894	9.04002	9.38913	9.28231	9.16824	8.84823	8.77896	8.6415	9.42346	9.10878	9.28019	9.15835	9.31408	9.31179	9.33904	9.38494	9.30349	9.14841	9.29382	10.5046	10.0511	9.63058	10.6061	8.8257	10.3101	10.0084	10.3187	9.83081	9.32937	9.20587
TMEM55A	5.78042	5.37771	5.77602	6.16326	5.61115	5.5469	6.0551	5.79104	5.92429	4.58471	5.15283	4.99459	5.2638	5.66888	5.43876	4.73537	4.99626	4.68348	4.61734	5.78121	5.87838	5.90153	6.52418	5.49465	5.47427	4.72783	4.81688	4.90182	4.39613	5.87786	3.59621	4.4089	3.41738	3.91707	5.7724	5.38039
TMEM55B	8.5151	8.61927	8.50583	8.48963	8.34127	8.70103	8.53602	8.65606	8.58717	8.54518	8.50112	8.45035	8.54914	8.38476	8.6012	8.11494	8.36993	8.194	8.1909	8.43121	8.38048	8.57588	8.51717	8.74841	8.72945	8.48879	8.39604	8.5343	8.51889	8.65291	8.28671	8.19367	8.28024	8.20081	8.28402	8.60982
TEX40	5.13757	5.21717	4.95669	5.19792	5.5081	5.36044	5.59411	5.56014	5.11193	5.61356	5.80976	5.48194	5.56591	5.28242	5.28118	5.26801	5.33159	5.54674	5.46585	5.1352	5.39583	5.30492	4.92839	5.22574	5.16755	5.4598	5.66278	5.82167	5.90703	5.28265	5.2028	5.20981	5.06803	5.22844	5.28775	5.31789
TEX30	5.8893	5.67458	5.34715	5.46801	6.07082	5.5138	5.72001	5.63678	5.80368	7.64978	6.16189	7.24877	6.91284	5.66647	5.67817	5.97408	6.10194	5.80797	6.12672	5.87208	5.81056	5.59945	5.75628	5.30068	5.37895	7.1958	6.80167	6.3761	7.10841	5.5686	6.88478	6.50704	6.84147	6.50603	5.67001	5.25505
TEX10	7.05064	7.1212	6.97143	6.81255	7.47709	7	6.94945	7.06213	7.1049	7.33093	7.04981	7.10542	7.07863	7.25389	6.93205	6.51025	6.91026	6.40735	6.68437	6.97753	7.23613	6.97272	7.01243	6.73864	6.87719	8.47794	8.14198	7.90343	7.93808	7.08063	7.21087	7.1374	7.39076	7.20664	7.06267	6.84506
ECE1	7.29756	7.12103	7.31188	7.25129	7.66127	7.11693	7.44902	7.17205	7.22629	7.62782	7.0744	7.30781	7.37993	7.16282	7.04631	7.9958	7.66563	8.08843	7.99609	7.21694	7.05613	7.11301	7.30454	7.27616	7.14167	7.28301	7.46374	7.59556	7.25405	7.15558	7.36664	7.20243	7.20379	7.47793	7.28087	7.16761
ECE2	4.82712	5.4565	4.72927	4.65542	4.78348	4.76249	4.98862	5.52824	4.89966	7.95168	6.48863	7.44282	7.42272	4.73852	5.16835	7.26887	6.79882	7.29222	7.34819	5.06667	5.67192	5.04704	4.90981	5.39217	4.93304	8.3342	8.33666	8.65376	7.80295	4.51909	8.59076	8.21676	8.64103	8.30677	4.98087	4.81947
ECI1	7.62566	8.15853	7.78185	7.79261	7.44303	7.79658	7.33359	7.70112	7.85423	8.43165	7.49957	8.0697	7.75762	7.47112	7.67144	7.97422	7.68732	7.82768	8.1273	7.48442	7.41277	7.65626	7.85071	7.4968	7.67027	8.13505	8.25389	8.29302	8.0785	7.55568	8.07715	7.66558	8.00299	7.39965	7.51254	7.54959
ECI2	7.98153	8.55915	8.33281	8.54677	7.78197	8.05889	7.99217	8.11269	8.43913	7.32135	7.84557	8.29771	7.64461	8.3089	8.18575	8.18757	7.90546	8.15862	8.12792	8.50731	7.98755	8.36922	8.43073	8.1365	8.29949	7.21691	7.35005	7.1475	7.35857	8.30169	7.89232	7.83751	7.90261	7.99341	7.37397	8.02908
ECM1	7.66696	7.97512	7.57339	7.74482	7.73203	7.58791	8.48451	7.8369	7.82364	8.85242	8.14584	8.42098	9.04068	7.59554	7.58786	9.28503	8.81557	9.49586	9.07728	8.02418	8.25903	7.92619	7.65665	7.89537	7.41733	7.59134	7.6655	8.14354	8.10261	7.93799	7.65494	8.27075	7.75328	8.17199	7.77003	7.72865
ECM2	6.56979	6.34725	6.8172	6.56339	6.76227	6.0264	6.99131	6.47925	6.52732	5.75084	6.17443	6.33238	6.6127	6.76308	5.87216	5.90016	5.59014	5.85707	5.88113	6.41042	6.79891	6.86093	6.59708	6.2135	6.32466	4.68605	5.09843	5.55507	5.64744	6.2123	4.35841	5.23157	4.75228	4.86724	6.44906	6.73603
ECT2	4.60052	4.87826	4.70586	4.97145	5.36707	4.77114	4.7945	4.86136	4.92236	8.07726	6.7424	8.0343	7.63454	5.22563	5.03456	6.47421	6.25087	6.44788	6.70123	4.73048	5.27947	4.77918	4.64036	5.04157	4.74487	8.05939	7.77964	7.50432	7.4558	4.56503	8.13153	7.89773	8.30406	7.83964	4.90465	4.881
MKRN1	8.23731	8.37779	8.54006	8.4398	7.98965	8.31354	7.99173	8.39093	8.42233	7.7189	8.14936	7.84432	7.91676	8.13047	8.31174	8.02388	8.15873	8.21666	8.07983	8.31207	8.14751	8.37496	8.69196	8.58123	8.32058	8.64159	8.40493	8.11868	8.26041	8.26245	8.65461	8.76824	8.8272	8.8059	8.10373	8.32656
MKRN2	6.39867	6.5374	6.49299	6.82615	6.4149	6.18069	6.75903	6.46861	6.72027	6.0253	6.35101	6.35199	6.19897	6.80208	6.7171	6.13777	6.14605	6.03959	6.07761	6.95078	6.53675	6.84015	6.77837	6.83385	6.539	6.18142	6.22272	6.26829	6.25698	6.69991	6.85044	6.57747	6.72808	6.76093	6.30682	6.55581
EDC3	6.19912	6.30665	6.20161	6.13154	5.98057	6.23576	6.29402	6.28028	6.12231	5.79846	6.28619	6.30368	6.40018	6.19751	6.35435	6.48297	6.47853	6.62821	6.73627	6.35891	6.12726	6.25501	6.09119	6.23472	6.24507	6.84637	6.69259	6.87246	6.2943	6.1119	7.1992	6.8714	7.11827	7.12153	6.07053	6.12101
EDC4	7.69201	7.33685	7.4842	7.29511	7.98921	7.84662	7.60194	7.56563	7.4279	7.59569	7.43827	7.31541	7.54089	7.6	7.42808	7.44893	7.4452	7.15951	7.489	7.14112	7.53921	7.21749	7.47073	7.24825	7.41211	7.37676	7.2798	7.21031	7.50201	7.42989	7.22633	7.01417	7.16947	6.82188	7.62484	7.49
EDAR	5.00085	5.1079	5.0125	4.7796	5.20349	5.09308	5.42307	5.28567	5.35677	5.44886	5.31918	5.43211	5.33078	5.07805	5.06909	5.38089	5.06754	5.39802	5.28831	4.79594	5.04733	5.29484	4.92699	5.02283	5.13162	5.14184	5.03173	5.15689	5.33706	4.83024	5.17238	5.08403	4.96896	5.21135	5.05269	5.05232
EDF1	10.1079	10.4744	10.231	10.0869	9.87472	10.2771	9.98457	10.1902	10.1536	10.3712	10.157	9.89851	9.98838	10.0572	10.0661	10.0708	10.0409	9.82424	9.86044	10.0877	10.121	10.1197	10.0977	9.99934	10.0736	10.0559	10.2366	10.1684	9.94229	10.1677	9.92383	9.87589	9.93034	9.85967	10.0367	10.0298
EDN1	8.54728	8.57496	9.15972	8.16674	9.34438	10.0048	9.07655	7.15066	8.66088	6.85722	7.71934	6.86913	6.51244	9.31072	8.58561	6.89942	7.22378	7.68666	7.42315	8.81512	8.26748	8.27122	9.01619	8.02399	8.93187	5.50037	5.40702	5.38175	5.88352	8.22991	7.41543	7.7682	7.80447	8.89236	8.01705	8.99121
EDN2	4.39083	4.89448	4.49459	4.30551	4.65667	4.77062	4.49843	4.66852	4.40918	5.72979	5.52536	5.53102	5.56121	4.5052	4.56348	5.4473	4.99856	6.44464	5.49804	4.5701	4.62549	4.32416	4.47183	4.67238	4.28952	5.22225	5.08459	5.10561	5.69294	4.20647	5.74637	5.46215	5.28552	5.96612	4.29772	4.51277
EEA1	5.2054	4.36918	5.52606	5.52759	5.08027	5.18073	5.35144	4.60519	5.23323	6.15561	5.62733	5.77981	5.84392	5.35303	5.07062	5.09371	4.90456	5.31361	5.36298	5.67015	5.27656	5.51928	5.22047	5.13104	5.30987	5.3004	5.13882	4.8709	4.89343	4.92291	6.13849	6.07011	6.03957	5.92726	5.55186	4.98423
EEF2	12.1438	11.9367	12.0801	11.8719	11.8441	12.0234	12.0866	11.995	12.0577	11.9047	12.134	11.7731	11.8841	11.8804	12.0861	11.7482	11.9447	11.609	11.7393	12.0106	12.1156	12.1076	12.0561	12.1364	12.0588	11.9722	11.9877	12.0147	11.8664	12.0346	11.8676	11.9188	11.9073	11.9082	12.0012	12.0084
EFHB	3.47078	6.61765	5.86782	4.16805	4.42063	2.96833	3.98415	5.08901	3.43188	2.57977	2.65757	2.33862	2.36508	4.63917	4.20673	2.34219	4.38333	2.48576	2.50351	3.31267	3.09786	3.44668	5.03084	4.51484	5.16497	2.52109	2.36886	2.46711	2.3768	5.51638	2.52996	2.741	2.49005	2.70014	5.66142	5.44872
PRTFDC1	6.48928	6.55757	6.43197	6.30244	6.18895	5.792	6.28965	6.05932	6.35997	8.245	6.76073	8.20404	7.81736	6.25607	5.61555	5.84745	5.7707	5.5899	5.72003	6.52232	6.67041	6.15193	5.98499	5.60307	6.14658	7.10151	7.00811	6.67565	6.24933	6.50609	7.52741	7.43212	7.57678	7.83568	6.45366	6.16562
CYP4F3	4.64797	3.66139	3.17404	4.20675	6.21605	5.23287	3.70221	3.07194	3.38955	2.96713	3.22541	2.95255	3.31031	4.0669	3.50143	3.29548	3.40416	3.78584	3.81504	4.60732	3.30136	4.06733	3.95756	3.24702	3.2954	3.99182	4.5858	4.65478	3.19286	2.97422	3.55873	3.70559	3.55586	3.18098	5.18382	3.94452
EGFR	7.44158	7.10303	7.33666	7.41671	6.95019	7.22516	7.14495	6.76773	7.34744	8.3756	7.04898	8.29806	7.83082	7.34987	7.39903	9.15992	8.31349	9.79088	9.2853	7.7912	6.38358	7.40523	7.61551	6.95215	7.44003	11.1994	10.5716	9.68164	10.8383	7.22136	8.5109	8.60956	8.67221	8.90347	7.0983	7.14218
CYP4B1	10.7165	8.52371	11.4033	11.2861	10.3526	9.94098	10.2126	10.744	11.2783	5.38346	8.22286	3.60972	3.72324	10.6226	10.2431	4.65092	7.27443	4.18979	5.77439	11.3554	9.9275	11.1622	11.2057	11.035	11.2234	3.70985	4.59405	3.95627	4.09345	10.4119	5.78429	6.3981	6.09757	3.80153	9.88188	11.0716
CCDC102A	6.18404	6.00533	6.07765	5.77856	5.5103	5.44452	6.1613	5.78747	6.11149	5.68923	5.61336	5.89402	6.10269	5.75593	5.80569	5.48072	5.34562	5.47161	5.16203	5.56206	5.74663	5.61335	6.1159	5.79912	5.79421	5.26397	5.54596	5.50513	5.46873	5.80921	4.96621	5.00224	4.83468	5.15269	5.62148	5.56305
CCDC102B	7.32578	5.96578	6.9872	6.7886	6.29783	5.87453	6.49888	6.26709	6.66804	5.37935	6.95723	4.19978	4.37444	7.27928	6.22297	6.10634	6.53407	5.89017	6.06125	7.10897	7.82881	7.12191	6.69765	5.7614	6.25111	3.18696	4.02364	3.26414	3.02529	6.88943	5.0827	5.78275	5.43171	5.45072	7.15725	6.24203
EGR1	11.0068	8.736	7.76607	9.702	9.52246	9.81988	10.5364	8.78161	9.79481	7.66966	7.98098	7.99605	7.55765	9.09774	10.6089	9.60581	9.61411	9.73523	9.64637	9.89005	9.70699	10.2962	8.79922	7.30839	10.6957	7.32385	7.92879	7.31368	7.17132	10.8867	8.4695	8.69221	8.41302	8.49082	10.5668	9.80425
EGR2	9.3232	7.04756	7.20972	8.43304	8.39457	9.2208	8.92203	8.28826	8.46106	7.06994	6.42446	6.7052	6.49496	7.29511	9.28565	7.27808	7.92526	7.20975	7.57309	7.8017	7.90878	8.90062	7.1237	7.76277	8.55815	7.21858	7.32958	6.87152	7.00916	9.3461	6.14314	7.01367	6.37702	6.91156	9.20763	8.43239
EGR3	10.0796	5.33944	6.78657	7.32847	9.08481	8.76528	8.68385	6.98661	7.92475	6.03457	6.38518	6.00897	5.93256	7.7679	8.30739	7.42772	8.49537	7.31884	7.90881	5.90738	8.4474	7.75461	5.9916	3.86172	7.84568	5.12483	5.99791	4.75316	4.40158	8.26317	5.59558	6.85664	5.94271	5.89674	10.0116	8.0009
CCDC109B	7.2289	7.50707	7.46611	7.09973	7.29413	7.39827	6.98861	7.85199	6.99128	7.91647	7.92312	7.82031	7.70834	7.66175	7.15103	8.09785	7.99506	7.83683	7.90789	6.88206	7.78776	7.31638	6.97258	7.32003	6.71391	8.11052	8.25667	8.12787	8.06359	7.09778	7.85237	7.71498	7.86662	8.14934	7.31458	7.39983
EHD1	7.81827	7.72964	7.98013	8.01955	9.68247	8.1893	7.77013	7.69815	8.03348	7.15622	7.40856	6.98996	6.84795	8.29982	7.7124	7.71103	7.51101	7.33703	7.48573	7.68176	7.45616	7.91707	8.17677	7.75318	7.89612	6.59671	6.71463	6.75776	6.65907	7.76677	7.01814	6.78457	6.68888	6.85784	8.04041	7.62535
EHD3	6.27362	5.90905	7.0849	7.05545	6.47224	6.4111	6.12575	5.97022	6.98818	6.81568	6.50411	6.28866	6.78467	6.43426	6.50772	7.24021	7.31903	7.60017	7.48583	6.23301	6.68266	6.46796	7.40403	6.73331	6.64952	6.3375	6.42251	6.73401	6.19137	5.99896	6.31843	6.45995	6.33325	6.54833	6.25355	6.36221
EHD4	7.87166	6.55099	7.02568	6.87163	7.93109	7.21753	7.77144	6.73192	7.21677	6.63631	6.48086	6.4499	6.32586	7.26835	7.00718	6.91267	6.7948	6.85343	6.97772	6.90885	7.05794	7.27173	6.53357	6.73688	6.98742	6.26698	6.34765	6.53026	6.17767	7.24664	6.43638	6.47477	6.36638	6.36804	7.90365	7.02062
JARID2	7.5009	6.97159	7.10735	7.14206	7.61386	7.24471	7.04728	7.09661	7.27702	8.60485	7.60852	8.35029	8.08644	7.32845	7.24082	7.72377	7.61614	7.79946	7.78663	7.01266	7.27065	7.15896	7.14797	6.9139	7.22177	8.06245	7.87728	7.64939	7.77107	7.29816	8.29842	7.98522	7.97791	8.3055	7.17165	7.16939
DIDO1	6.95137	6.33182	7.21743	6.85361	7.06093	6.98356	6.77095	6.71288	6.94095	6.47938	6.14066	6.36604	6.36181	6.79735	6.44442	5.99153	6.1158	5.98939	5.99739	6.56785	6.71728	6.93378	7.03531	6.75767	6.79705	6.09378	5.91573	6.0023	6.16449	6.98956	6.16909	6.29689	6.33789	5.88448	6.73309	6.58307
EI24	8.51669	8.6435	8.45006	8.41152	8.15346	8.31073	8.34816	8.24629	8.41522	9.43117	8.68568	9.14732	9.09816	8.21057	8.46658	9.33597	8.97986	9.40738	9.40977	8.37549	8.60792	8.57243	8.39394	8.4119	8.33259	8.67819	8.66672	8.6009	8.48898	8.29497	9.17055	9.11932	9.2028	9.20043	8.25917	8.29635
CYP3A4	5.88401	5.87614	6.31732	6.03491	6.39103	6.12398	6.26667	5.76256	6.3667	6.0145	6.11548	6.00028	6.19516	6.03728	6.31434	6.2414	6.23455	6.33411	6.30443	6.14528	5.93043	6.01853	6.15411	6.09435	6.09714	6.17108	6.00038	5.8227	6.25373	6.36094	6.03212	6.14182	5.94922	6.06918	6.17037	6.30962
CYP3A5	4.21779	5.97582	6.55248	7.41057	8.15291	4.94253	5.4057	4.82653	7.37208	4.00829	3.61539	4.34035	4.43457	6.86294	6.49186	3.8169	3.82548	4.17744	3.96111	6.54884	4.35475	7.25218	7.44976	6.81917	6.91394	4.04714	3.7267	3.47864	3.4954	6.43542	3.87559	3.5102	3.28221	3.3312	5.74161	6.06295
CYP2U1	6.33576	6.30552	6.57192	6.96162	5.99463	6.17584	6.56644	6.38241	6.60323	5.12871	5.7383	5.24804	5.42112	6.56877	6.22102	5.29978	5.46966	5.38834	5.62987	6.43885	6.47583	6.7627	6.77027	6.44516	6.42933	4.82913	4.95867	4.89151	5.05711	6.67714	4.68047	4.83072	4.74832	4.7219	6.44202	6.44766
CYP2S1	5.56824	6.2973	5.96921	5.09977	5.51748	5.47818	5.50636	6.55164	5.37943	7.46696	7.11614	8.22978	8.89549	5.82774	5.75894	6.97052	6.91928	7.70704	7.21485	5.59837	5.3673	5.73772	6.11687	6.29035	6.10636	9.11959	8.73405	9.40933	9.58174	5.39344	8.25593	8.3176	8.65368	8.06315	5.38121	6.35969
CYP2J2	4.87282	6.18022	5.8194	5.05304	5.30349	5.13354	5.14652	5.60859	5.11532	4.98483	5.03988	5.16905	4.79102	5.10565	5.31305	5.02818	5.18214	4.77227	5.12897	4.62227	4.99731	4.787	5.24417	5.54594	5.88357	5.9444	6.40817	7.02094	4.78489	5.53274	6.96871	6.5415	6.97048	6.65561	5.56791	5.57903
CYP2R1	7.04972	7.50601	7.35175	7.20137	6.83925	7.3432	6.63295	7.10944	7.43351	7.16263	7.08663	7.29748	7.26776	7.19054	7.49303	6.48508	6.93242	6.56622	6.67668	7.54891	6.93595	7.32816	7.27071	7.01363	7.33162	6.98586	7.0368	6.96508	6.882	7.30056	7.28524	7.19278	7.27798	7.07296	6.98936	7.3388
EID1	9.2638	9.37108	9.75969	9.6088	9.20602	9.13801	9.36264	8.90262	9.55702	8.79613	9.03963	8.87765	8.76447	9.42797	9.1428	8.90193	8.87648	8.97926	8.97707	9.66693	9.35479	9.40143	9.48843	9.15283	9.41638	8.46641	8.74948	8.83631	8.18855	9.4188	8.80684	8.86377	8.75227	8.97659	9.25676	9.24966
EID2	7.98675	8.02087	7.79416	7.74873	7.83965	7.79002	7.90692	7.98082	7.8685	9.45713	8.44465	9.61677	9.59712	7.86239	7.88549	7.49942	7.76997	7.62869	7.69157	7.88406	7.98578	8.06114	7.86958	7.94108	7.81957	9.43565	9.00772	8.65356	9.31026	7.67815	7.74663	7.7453	7.72333	7.5359	7.87813	7.58519
EIF1	11.5704	10.9611	10.9424	11.1777	11.8972	11.3527	11.3643	11.0064	11.2748	10.5866	10.641	10.9609	10.8004	11.2876	11.4087	10.4229	10.5449	10.5983	10.5331	11.2392	10.8428	11.33	11.2588	10.9562	11.3534	10.5718	10.6969	10.859	10.3875	11.2272	10.9008	10.8462	10.89	10.965	11.6439	11.068
EIF5	8.04222	8.35654	8.20449	8.1537	8.92946	8.38255	8.01274	8.236	8.35007	8.97322	8.73013	9.05738	8.83752	8.48872	8.15602	8.213	8.45987	8.13083	8.18828	8.46973	8.2364	8.26761	8.11367	8.31959	7.95404	9.10682	9.22374	9.40052	8.69777	7.56395	8.92692	8.89023	9.17678	8.98391	8.6246	8.05083
EIF6	8.54774	9.01691	8.51498	8.37566	8.71378	8.46184	8.41209	8.8982	8.62488	9.90897	9.1603	9.82101	9.80024	8.63058	8.61838	9.48909	9.31446	9.47994	9.57567	8.2112	8.6899	8.54093	8.56814	8.7876	8.42636	9.54213	9.23544	9.01678	9.46288	8.31496	10.1546	9.74549	9.921	9.85021	8.43052	8.50816
DIEXF	5.63839	5.87192	5.84313	5.56442	5.77028	5.84502	5.60087	6.00407	5.86698	6.69559	6.07584	6.46358	6.31998	5.4299	5.5329	6.46973	6.2461	6.95985	6.9249	5.7992	5.91536	5.74416	5.7351	5.61175	5.64983	7.05027	6.65324	6.68322	6.7843	5.6677	7.43987	7.18154	7.37251	7.57821	5.64552	5.62087
KIFAP3	8.10187	8.16196	8.26914	8.28326	8.01268	7.89801	8.20258	8.12876	8.3044	7.66112	7.86225	8.03013	8.2561	8.3684	8.05246	8.76708	8.47479	8.98293	8.657	8.29849	8.23175	8.16435	8.40401	8.05837	8.21343	7.6574	7.41226	7.31274	7.67486	7.9675	7.79976	8.0332	7.88644	8.18467	8.05352	7.95288
CYP4X1	6.85088	7.70061	7.53805	7.3628	6.80269	6.37113	6.5137	7.04038	6.93295	6.05137	6.22371	6.29957	6.61429	6.74095	7.09372	5.75175	6.28465	5.23069	5.83164	7.11867	6.44299	7.03657	7.05063	6.78695	7.44533	7.18253	7.33529	7.45414	6.51321	7.74425	7.12181	7.91129	8.03769	7.19207	7.50109	7.18062
CYP4V2	6.986	6.99972	7.16505	7.54029	6.90572	6.81451	6.78664	6.88619	7.76044	4.91758	6.41046	5.22178	5.47771	7.11987	7.18132	5.28181	6.21323	5.12212	5.63367	7.95794	6.9557	7.36404	7.18028	6.7833	6.68117	5.81773	6.15265	6.23497	5.72057	7.63669	3.79259	4.63951	4.22028	3.62548	6.39996	7.11323
KCNC3	4.68878	4.8304	4.29514	4.37176	4.43907	4.67508	4.76446	5.30094	4.48706	4.99469	5.20231	5.00601	5.48384	4.26964	5.13587	5.76297	5.52193	5.74877	5.61523	4.85249	4.8252	4.6838	4.33171	5.20423	4.83525	5.59085	5.50317	5.56829	5.89725	4.62539	5.36596	5.38869	5.34249	5.51041	4.58498	5.1304
KCNC4	5.82158	5.08589	5.02185	4.70564	5.01074	5.05444	6.45155	5.17643	5.53417	5.06204	4.63962	5.12978	5.10123	4.51603	4.75098	5.47292	5.16434	5.37185	5.49946	5.21802	5.78245	5.21787	5.34025	4.61204	4.77728	4.66014	4.59654	3.99001	5.04366	4.81598	4.9645	4.89375	4.82084	5.54467	5.03636	5.03572
KCND2	3.72036	3.02921	3.67275	3.27917	3.44053	3.49526	3.33414	3.52372	3.2435	5.15654	3.86805	5.76777	5.90836	3.39937	3.42113	4.80484	3.71868	5.16729	4.88442	3.16018	4.32953	3.20171	3.27396	3.34077	3.03976	3.61524	3.72805	3.70991	4.27035	3.24886	3.5563	4.47761	4.20638	4.92448	3.22524	3.22453
KCNA3	5.1475	5.25093	5.47626	5.61389	5.91533	6.0979	5.70304	5.08583	5.46323	4.5617	5.51981	5.26225	5.28172	5.67574	5.40918	4.45341	4.68795	4.56255	4.44518	4.9142	4.71087	5.15197	5.03865	5.23878	5.04241	4.71859	5.30572	5.05155	5.34512	4.82278	4.13841	4.42917	3.99551	3.99469	5.83676	5.86036
KCNA5	5.55588	5.82277	5.72847	5.5908	7.08377	5.91619	5.96833	5.89539	5.73899	3.79105	4.83861	4.05219	4.06543	5.35699	5.71132	4.10916	4.34634	4.00645	3.97182	5.38873	5.21679	5.02591	5.53579	5.50545	5.79644	4.35379	4.55728	4.38059	4.81252	5.87175	4.22882	4.74781	4.29777	4.02489	6.6226	6.20398
KCNB1	4.38968	4.48132	4.08442	4.88295	4.8371	4.54757	4.52724	4.53446	4.59869	4.11478	4.2307	4.04283	4.05329	4.48646	4.66249	4.12971	4.34622	4.24697	4.31285	5.06884	4.21135	4.57617	4.10195	4.39582	4.28478	4.12988	4.1509	4.20284	3.9859	4.86057	4.06813	4.0841	3.98926	4.1323	5.737	4.84593
KCNG1	3.90631	4.32191	3.8435	3.67493	4.20835	4.12762	3.83921	4.16511	3.80332	6.04708	5.78303	6.15029	6.56748	3.89985	3.83193	4.71922	4.56435	5.79945	4.81905	3.66932	4.19345	3.96826	4.00129	4.00316	3.9836	6.22147	5.94159	5.99021	6.19347	4.03472	5.24713	5.02336	5.28763	5.21755	4.04623	3.79659
KCNH2	5.43294	5.7582	5.5729	5.29003	5.28384	5.42154	5.13518	5.6286	5.76092	5.17295	5.49134	5.43478	5.66649	5.38968	5.29157	5.79913	5.52442	6.31982	6.23947	5.57271	5.39567	5.55705	5.58572	5.07775	5.56989	5.29478	5.12159	5.23719	5.36589	5.74575	4.7518	4.87489	4.80573	4.95385	5.2818	5.39299
KCNH3	5.56675	6.16563	5.84348	5.70343	5.94058	6.02806	5.62945	6.14733	5.84039	5.93386	6.33447	6.2822	6.1128	6.01166	5.87371	6.13955	6.30017	6.08802	6.16597	5.49524	6.16187	5.77856	5.98275	6.30243	6.16742	6.05726	6.08981	6.18549	6.27701	6.08232	5.85726	6.02854	5.9599	6.02587	6.26773	6.07521
KCNE1	4.43435	7.77508	6.41358	4.99238	5.95164	5.20244	4.37007	6.13476	4.17493	3.77911	4.36507	4.11507	4.09406	4.9201	5.98296	3.35101	5.87851	3.57913	3.48383	4.56977	4.69849	3.57559	5.01407	6.29539	5.77481	3.44422	3.74567	3.68809	3.87772	5.87989	3.62431	3.86406	3.53088	3.2652	6.12327	6.48544
KCNE3	7.00833	7.16501	6.65909	6.83617	5.97324	6.6114	7.11455	7.12254	7.02215	6.25701	6.47157	6.41547	6.3668	6.33945	7.07302	6.35671	6.3906	6.08455	6.16323	6.57113	7.47854	6.91351	6.65546	7.27457	6.49937	6.58003	6.91344	7.27013	6.14396	6.51637	7.38553	7.13749	7.31577	6.78523	6.09506	7.02921
KCNE4	5.38385	4.68096	5.21115	4.57674	6.36182	5.15696	5.48827	4.62979	4.53001	5.71825	6.4584	6.08629	6.16762	6.01719	4.62239	6.03203	6.18429	5.77786	6.42655	5.10653	6.93022	4.78185	4.19935	3.97986	4.80065	4.05498	4.7394	4.48572	4.84107	4.68901	5.04886	5.35811	4.72942	5.63581	5.28265	5.36238
KCNF1	4.90372	5.06498	4.61961	4.83848	5.01028	4.86521	5.1591	5.31059	4.92659	5.1671	5.24131	5.24877	5.15591	4.83861	4.67567	5.40379	5.2843	5.52506	4.81288	5.10556	4.88431	4.97892	4.94693	4.96985	5.15782	5.39853	5.3781	5.49975	5.83737	5.45746	5.20618	5.24292	5.27982	5.2635	5.10887	4.99572
KCNK5	6.61442	6.9626	6.47115	6.25885	6.55886	6.51308	5.73007	6.56428	5.89327	5.24318	6.5119	4.3731	4.34576	5.93106	6.27388	5.39992	5.76034	5.05658	5.52003	5.49687	6.54775	6.22037	6.18062	6.43739	6.0878	4.61684	4.9071	4.96971	4.93273	6.3743	4.93056	5.25485	4.70604	4.82151	5.93284	5.77485
KCNK6	4.96327	5.00343	5.29393	5.34866	4.89903	5.06413	5.2976	5.57122	5.38749	5.98488	5.38618	5.62905	5.84407	5.1293	5.4419	6.05256	6.14232	5.68974	6.07316	5.30851	5.37581	5.36477	5.24881	5.85231	5.25079	6.2572	5.82491	5.54532	6.45014	5.30792	5.14944	5.56913	5.37901	5.49666	4.85958	5.26325
KCNK9	3.90065	4.09788	3.98535	4.16877	4.38865	4.32713	3.99314	4.37307	4.03154	4.95197	4.49823	4.94184	4.87876	4.11094	3.97505	4.88661	4.52657	4.84498	4.52299	4.15447	4.29062	4.08568	4.05482	4.01792	3.91368	6.2953	6.57409	6.68404	5.24552	4.10398	4.75375	4.90766	4.77766	5.34286	3.85623	4.40891
KCNJ2	7.67399	6.3488	5.89662	6.28799	7.44891	7.715	9.08691	7.23432	6.9211	8.32407	7.99811	8.11081	7.99177	6.6832	6.43847	7.35398	7.66871	7.71776	7.56611	6.81106	8.64803	6.64561	6.34061	6.25064	6.00947	8.63567	8.17747	6.9769	7.99983	6.62122	8.71573	9.30734	9.145	9.43941	7.18261	6.75932
KCNJ5	5.14088	5.47719	5.22431	5.39656	5.39803	5.38977	5.43518	5.53324	5.3569	5.57923	5.8631	5.82248	5.90443	5.61874	5.52468	5.82815	5.70084	5.8315	5.74887	5.20655	5.6591	5.60685	5.12878	5.48463	5.5159	5.80624	5.87749	5.99416	6.14165	5.36406	5.62131	5.76394	5.71103	5.5224	5.57195	5.61353
KCNJ6	4.37999	4.7193	4.459	4.17766	4.4947	4.41672	4.46387	4.28572	4.44028	4.32304	4.62706	4.67876	4.64991	4.47243	4.56937	4.53859	4.5932	4.67093	4.31292	4.25523	4.26368	4.19866	4.56969	4.42904	4.58892	4.78882	4.47837	4.76353	4.76815	4.53189	4.42101	4.6546	4.44631	4.28069	4.20906	4.50679
KCNJ8	7.83097	7.23766	7.2291	7.34827	6.91209	7.4647	7.05699	7.49875	7.68884	6.83283	7.18911	6.27465	6.33958	7.02735	7.99748	7.25266	6.9367	6.61411	7.14177	7.32162	8.30677	7.88635	7.60048	6.82737	7.58952	5.44858	5.6841	5.57398	5.73475	7.29049	6.62041	6.97097	6.72437	7.11324	7.12634	7.56533
KCNK1	6.27514	6.59911	6.36254	5.92749	6.89248	6.8255	5.9314	6.24958	5.62069	7.06692	7.04184	7.109	6.94609	6.99653	6.35637	7.66168	7.34578	7.67619	7.62686	6.03508	6.34565	5.94659	5.5456	5.86798	6.20031	8.02585	7.29667	7.17825	7.95436	5.64846	6.68143	6.88838	6.9256	7.05381	6.56911	6.36765
KCNK3	8.37032	8.2312	8.16564	8.78174	8.19711	7.52958	8.78228	7.89299	8.28073	5.45677	7.14715	4.82768	4.84492	8.27629	8.45308	6.0893	6.40591	5.66484	6.20728	8.9423	8.54102	8.76797	8.76488	8.30532	8.74487	4.55785	4.76854	4.65579	5.13685	8.57261	6.04414	6.60161	6.30515	5.43016	8.69935	8.41217
KCNQ1	7.12939	7.34623	7.11605	7.19772	7.20614	7.16159	7.3174	7.34159	7.17108	6.92923	7.41966	6.49268	6.41894	6.90482	7.38208	6.80826	7.1382	6.70996	6.8362	6.94405	7.21271	7.14702	7.13994	7.51163	7.24478	5.97878	6.06847	6.101	6.18695	6.86663	6.51552	6.55938	6.31312	6.26436	6.9873	7.26626
KCNQ2	4.13772	4.0115	3.63812	3.7497	3.91355	4.04265	4.09671	4.02331	3.9005	4.18481	4.17814	4.20526	4.17708	3.85019	3.94058	4.1473	4.23071	4.38495	4.14927	3.63588	3.9051	3.75252	3.62104	3.95247	4.01735	4.25323	4.15452	4.42143	4.52139	3.88247	3.94406	4.25462	4.2741	4.2207	3.75953	3.88298
KCNQ4	5.47216	4.9203	4.76762	5.22101	4.96386	4.55957	5.05604	4.74605	4.67197	3.56258	3.8972	3.33829	3.32044	4.67004	4.59459	3.6983	3.72637	3.91985	3.91441	4.81924	4.98729	4.98471	4.83183	4.28604	4.91022	3.62519	3.51695	3.70452	3.90934	5.02729	4.53403	4.10821	3.75849	4.09731	5.53677	5.10046
KCNQ5	2.98093	3.14487	2.93279	3.16419	3.10125	2.75697	3.54139	3.02984	2.85703	4.6553	3.56233	4.36292	4.10446	2.83422	2.71294	3.5957	3.74079	3.78244	4.0707	3.08022	3.32919	3.1151	3.18061	2.85219	2.8	3.38935	3.0681	3.25707	3.55232	3.05557	4.60466	5.03162	5.03942	5.59095	3.06899	2.88723
KCNN1	5.03018	4.99146	4.7276	5.07263	5.30403	5.22992	5.19438	5.3317	5.08293	5.3979	5.33789	5.49668	5.5331	5.23505	5.35716	5.40331	5.51097	5.19305	5.35257	4.79137	5.33713	4.86512	5.10545	5.11744	4.85482	5.47537	5.28719	5.40542	5.69035	5.10349	5.18921	5.06407	5.30454	5.57599	5.22332	5.02671
KCNN2	5.62817	5.84677	5.55282	5.83494	7.45739	4.19073	6.80751	5.31251	6.2535	5.13598	4.82798	3.92236	3.85082	6.56573	5.53609	4.52508	4.3714	4.79129	4.66249	4.80022	5.35056	5.85395	4.45998	5.18978	5.65346	3.59624	3.84749	3.51285	3.963	4.59219	4.39975	4.42867	4.13675	4.59217	4.86163	4.80182
KCNN3	5.45779	5.34716	5.86704	5.00182	5.28336	5.26503	6.43835	5.36733	5.6402	5.56353	6.0879	6.33525	6.70703	5.69978	5.24384	5.67671	5.8087	5.6792	5.71996	5.12845	5.24366	5.99596	5.55169	4.62102	5.28952	5.91486	6.28661	6.21488	6.8386	5.66723	4.53373	5.45418	5.05963	4.85042	5.47467	5.32719
KCNN4	4.83128	5.68535	5.1634	5.09001	6.09578	6.53134	5.23765	6.77511	4.98673	6.40386	6.4408	5.88183	5.96938	5.96029	5.38385	7.19492	6.51354	6.90776	6.75484	5.117	5.5587	5.09858	5.23486	5.75438	5.43157	5.41908	5.70975	5.77265	5.90748	5.63734	4.96654	5.57736	5.26075	6.33856	5.04572	5.68351
TFB1M	6.32894	6.60891	6.33714	6.26877	5.71379	6.33301	5.92075	6.31891	6.40364	7.22184	6.60795	6.9764	6.80306	6.34648	6.44495	6.75598	6.76834	6.81723	6.85448	6.3373	6.34526	6.32022	5.84685	6.1658	6.26407	6.33598	6.65327	6.86572	6.35139	6.37437	8.45242	7.65128	7.98771	8.01499	6.25341	6.35868
KCNT2	6.70534	6.36476	6.50463	7.26057	5.99408	6.05713	6.41791	6.2521	6.84659	3.59276	4.2122	3.88235	4.98793	6.6582	6.58292	3.69205	4.50932	3.38202	3.89751	7.10593	5.25145	6.94024	6.27113	5.85647	5.86137	2.82163	2.95308	2.78382	3.05005	5.73188	2.78267	3.44107	2.8453	2.78344	6.48189	5.95946
TFB2M	5.61374	6.03149	5.84	5.76687	5.97888	5.80179	5.64409	6.14169	5.78512	6.34404	6.24817	6.44396	6.48284	5.72689	5.75622	6.49134	6.59853	6.6835	6.8045	6.0396	5.9832	6.07589	5.78807	5.88825	5.8191	6.84625	6.69496	6.89844	6.70399	5.71509	7.12331	6.80597	6.93958	6.89949	5.82037	5.76931
KCNRG	4.23119	7.1173	5.59442	4.16895	4.57481	4.1976	4.11736	5.17569	3.85927	3.90203	4.30006	3.90454	3.91218	4.60386	4.6997	3.79767	4.8111	3.75681	3.95181	4.26564	4.15997	3.81036	4.66245	4.9413	5.59885	4.10822	3.80606	3.85599	3.88344	5.69785	3.85625	4.04679	3.88991	3.67715	5.63076	5.63688
TFAP4	4.86094	5.19203	4.92809	4.78663	5.1276	5.18736	5.31071	5.54061	5.06662	5.42318	5.33042	5.5516	5.62118	4.98949	5.34318	5.88728	5.50078	5.68133	5.82533	5.15658	5.1349	5.00254	5.17175	5.42772	5.17999	5.91794	5.86231	5.95063	6.20878	5.56601	5.67037	5.37563	5.58727	5.75436	5.00681	5.25734
KCNS1	5.52553	5.61916	5.2427	5.33139	5.31926	5.79477	5.36777	6.10889	5.15069	5.92857	5.96217	6.24137	6.1082	5.42112	6.12915	6.55095	6.32133	6.67118	6.69344	5.62087	5.4508	5.43586	5.36132	5.89446	5.73761	6.09238	5.69554	6.19058	6.57513	5.55202	5.6929	5.83206	5.5535	5.55736	5.36448	5.63686
KCNS3	8.84246	8.36305	8.87627	8.47809	8.06271	8.25715	8.57203	8.66012	9.14332	7.76007	7.80815	7.01436	7.0796	8.53359	8.50439	8.05599	7.55788	8.07549	7.87286	8.67931	8.12897	8.68341	8.69094	8.64992	8.73378	8.97384	9.12956	9.24966	8.69798	8.74394	7.02347	7.72228	7.22358	7.77749	7.96988	8.72103
ZMYND15	5.38247	6.27501	5.9775	4.9639	5.6931	6.34436	6.11214	6.23957	5.95741	5.12661	5.4283	4.97649	5.19299	6.06453	6.16213	4.77549	4.91997	4.75578	4.69222	5.39968	5.24786	5.85372	5.65166	6.56576	6.18563	4.80044	4.80416	4.75654	5.29327	5.34745	4.72578	4.81388	4.76137	4.58191	5.6566	6.36182
ZMYND19	6.75226	6.90375	6.8504	6.59155	6.45129	6.70993	6.76043	6.76962	6.62866	8.1517	6.85037	7.18003	7.38662	6.43028	6.81758	7.16891	6.93166	7.18293	7.19666	6.49829	6.6419	6.69842	6.72376	6.68104	6.84262	7.89705	7.83318	8.08318	7.43852	6.52412	7.60861	7.23768	7.48857	7.15024	6.5102	6.66564
ELF1	8.78593	8.74167	8.89486	8.76864	8.87097	8.75239	9.04902	8.39031	8.81449	8.66805	9.04061	8.79033	8.53104	9.20464	8.83921	8.36232	8.67656	8.31355	8.30573	9.00812	8.74295	8.75775	8.70818	8.56954	8.68422	8.6504	8.7624	8.5756	8.34184	8.49369	8.20706	8.37056	8.24193	8.28566	8.94036	8.6198
ELF2	6.50825	6.50767	6.69483	6.6479	6.75153	6.43005	6.80897	6.29637	6.67905	6.92775	6.63941	6.90326	6.93379	6.69357	6.55109	6.62101	6.62625	6.79642	6.4168	6.75629	6.77416	6.72485	6.8984	6.61511	6.54839	6.36445	6.35218	5.96062	5.94801	6.61984	5.90637	6.25085	6.18484	6.11402	6.41466	6.41179
ELF3	9.03512	8.02823	7.4204	7.33248	9.86904	9.19557	7.81394	6.98358	7.54884	7.89869	7.15827	7.49382	7.46812	8.65645	8.54512	6.32709	7.19477	6.94658	6.33439	6.99522	6.75051	7.37789	6.99127	7.26466	8.40637	8.10931	7.47027	6.99864	7.76438	7.63979	8.65728	8.02513	8.20127	7.67267	8.57807	7.38889
ELF4	6.9367	6.88484	6.93934	7.06093	7.66139	7.10494	7.20165	7.28667	7.01951	7.70169	7.26145	7.62737	7.6153	7.34424	6.99771	7.51216	7.30706	7.51198	7.60173	6.57844	7.12216	6.94499	7.17467	7.11695	6.91079	7.75337	7.76203	7.79008	7.45204	6.69203	6.92319	7.21847	7.24585	7.27409	7.04753	6.81904
ELF5	7.68715	7.87016	6.70704	7.20671	6.06184	8.44727	5.04587	8.41532	5.97197	7.13955	7.39675	7.2479	6.95413	5.78072	7.2519	4.11372	5.17898	3.92127	4.18326	7.15099	6.88943	6.04727	5.83524	8.17222	7.1647	4.34356	4.43926	5.36173	3.95324	6.20744	5.42552	5.59198	5.30679	3.8057	6.82819	7.60745
ZMYND10	5.2724	8.22103	7.03005	5.49838	5.78995	4.99629	5.37239	6.27356	4.90633	4.84009	5.22179	4.93152	4.83177	6.20897	5.62527	4.99555	6.025	4.88232	4.61828	5.18211	5.07275	4.72723	5.71913	6.43093	6.7719	4.71886	4.65836	4.89017	4.95682	6.74163	4.85276	4.84794	4.73185	4.84939	7.14557	6.67564
ZMYND11	6.4963	6.67285	6.73631	6.5778	6.50363	6.59407	6.71501	5.84412	6.70164	6.59973	6.42303	6.87977	6.33139	6.55786	6.64214	5.91138	5.96283	5.9842	6.1399	6.87063	6.35413	6.55499	6.84796	6.43787	6.53311	6.53231	6.80169	6.68492	6.20847	6.33031	6.57448	6.4172	6.54548	6.43828	6.47671	6.29952
ZMYND12	4.72262	7.25959	5.38399	4.99947	5.42665	5.20919	4.32677	6.01028	5.18332	3.95683	4.83474	3.93034	3.87352	5.3768	5.37793	4.00231	5.33849	4.05209	4.04361	4.84477	5.25453	4.25714	4.73467	5.72233	5.74161	4.05874	4.11022	4.049	4.42251	5.9584	5.59587	5.57537	5.81767	5.45656	6.29576	6.20681
LINC00511 /// LINC00673	4.50307	4.74516	4.02529	4.15131	4.25906	4.32121	4.36598	4.6745	4.35741	5.02367	4.71183	4.82088	5.03531	4.24637	4.32012	5.09403	4.8074	5.22211	5.04966	4.06387	4.41782	4.11372	4.18203	4.45402	4.46074	5.48476	5.40295	5.30431	5.45629	4.18464	5.61549	5.62986	5.62328	5.75267	4.26945	4.14236
ELK1	5.97361	6.21089	5.91519	6.01761	6.07969	6.04648	6.37248	6.46949	6.02816	6.90311	6.85374	6.93073	6.90044	6.06973	6.13156	6.9299	6.6839	6.8695	6.90156	6.10095	6.48164	6.2062	6.07017	6.23115	6.04383	6.53539	6.78	6.92615	6.72944	5.93815	7.14139	7.07248	7.16463	7.22052	5.86914	6.05885
ELK3	7.14463	6.97321	7.31815	7.3378	7.49448	6.9067	7.68561	7.17618	7.21162	7.00839	7.19104	6.89185	6.98132	7.30332	6.79579	7.12748	7.1904	6.96925	7.08411	6.84337	7.5744	7.30548	7.45868	6.94163	7.26624	6.38843	6.3319	6.23452	6.55597	6.93265	6.52189	6.65982	6.34131	6.55646	7.11034	6.9083
ELL2	8.62665	7.18017	6.92853	7.3075	9.47882	8.59986	8.32754	7.60166	7.69623	7.96676	8.24529	8.03314	8.18356	8.52114	8.42543	8.35734	8.70214	8.52074	8.53745	7.70379	7.85118	7.14566	7.23382	7.41538	8.15301	7.05269	7.60964	7.28044	8.11336	7.50293	7.96346	7.90194	7.9016	8.00162	9.01102	8.17818
ELL3	5.09106	6.57422	5.65228	5.27406	5.14136	4.97748	4.53831	5.41863	4.87242	6.13581	5.52054	5.529	5.45165	5.00196	4.96492	4.89522	5.25396	4.55668	4.92859	4.91332	5.03065	4.80342	5.27508	5.25423	5.13296	5.02556	4.99076	5.26377	4.7248	5.34911	6.25985	6.13719	6.28952	6.17711	5.74876	5.10174
ELP2	6.71156	6.67129	6.72109	6.6991	6.61867	6.69053	6.63685	6.39468	6.88982	6.35865	6.52867	6.42343	6.46738	6.53925	6.67875	6.63701	6.64732	6.69648	6.74285	6.86111	6.62831	6.68335	6.76945	6.68382	6.73299	7.21864	7.15022	7.18917	6.90021	6.8476	7.06409	6.86189	7.05123	6.92386	6.70696	6.77389
ELP3	7.17066	7.57673	7.42884	7.15844	6.9574	7.16027	7.28859	7.32383	7.42256	6.97085	7.14939	6.79035	6.77208	7.20154	7.01352	6.66232	6.80203	6.43614	6.61255	7.1188	7.45182	7.24378	7.22609	7.20484	7.0868	6.80392	6.89127	6.83643	6.60735	7.32591	7.46454	7.48306	7.47643	7.62454	7.24878	7.06396
ELP4	7.24556	7.15629	7.13915	7.17402	6.96594	6.85603	6.91765	6.9731	7.45111	7.41052	6.76963	7.12101	6.71205	7.0874	7.21241	6.6277	6.58738	6.39575	6.68899	6.79327	7.16329	6.86502	7.14418	6.92316	6.905	7.07821	7.13964	6.98246	6.66393	6.89932	7.49577	7.39559	7.48758	7.63665	6.82616	7.1108
ELP5	7.20338	7.17232	7.14705	7.02955	6.87274	6.81732	7.07864	7.14725	7.18349	7.31951	7.15037	7.47637	7.16902	6.9945	7.19869	6.94016	7.09609	6.80469	7.15517	6.86731	7.29037	6.84474	7.11492	7.18666	6.95537	6.77712	6.74729	6.71749	7.01787	6.64005	7.83474	7.52158	7.81517	7.64107	6.72705	7.02243
ELP6	5.77813	6.25957	6.00418	5.96768	5.60203	5.94786	6.06476	6.06432	6.08445	6.32797	6.02644	6.34366	5.97399	6.20587	6.0183	5.50682	5.62732	5.33378	5.52618	5.81214	6.23201	6.09932	5.93026	6.01737	5.78022	5.94013	5.98215	6.10312	5.83393	5.91894	6.89501	6.58631	6.98286	6.68889	5.81289	5.96309
KCMF1	7.85177	7.96716	7.76503	7.78121	8.09539	7.9459	7.93748	7.91496	7.91395	8.5256	7.83239	8.32672	8.38413	7.92792	7.84568	8.55896	8.19541	8.81106	8.6037	7.78523	7.78042	7.89071	7.98675	7.75193	7.78807	8.23572	8.08179	8.16672	8.00473	7.58734	8.48592	8.34603	8.32842	8.96006	7.77865	7.59397
EMC1	5.87981	6.09147	6.06992	6.0073	6.01421	5.99355	6.14563	6.19084	6.28452	6.72632	6.09658	6.3595	6.33895	5.9642	6.23764	6.91424	6.32394	6.90778	6.88195	6.10953	6.05174	6.33436	6.0847	6.11908	5.96768	6.43289	6.4976	6.52375	6.1803	5.96945	6.86856	6.85219	6.84333	7.29193	6.02204	6.13437
EMC2	8.57154	8.55031	8.76224	8.85813	8.51825	8.44474	8.63875	8.51969	8.87107	9.14735	8.83864	9.04537	8.85731	8.79268	8.73383	8.77055	8.728	8.9703	8.76202	9.17751	8.79143	8.96495	8.60487	8.83964	8.81441	8.91337	8.94193	8.9796	8.63708	8.80735	9.72443	9.63932	9.76336	9.67812	8.7571	8.55641
EMC3	9.07066	9.48967	9.40462	9.37384	9.06803	9.39531	9.1883	9.311	9.29294	8.84883	9.12893	8.74576	8.62527	9.37344	9.42055	8.66412	8.78839	8.56765	8.58967	9.07625	9.29491	9.33088	9.07484	9.40611	9.2427	8.83226	8.98741	9.21277	8.75568	9.1634	9.0228	8.98589	8.96412	8.94019	9.1964	9.37353
EMC4	9.50463	9.80264	9.69082	9.76538	9.30811	9.42482	9.60727	9.49678	9.79605	9.72705	9.55854	9.65768	9.36439	9.71041	9.50751	9.83611	9.67972	9.96593	9.95969	9.82227	9.48882	9.73804	9.67083	9.67327	9.53255	9.70994	9.78433	10.066	9.45421	9.54929	9.20992	9.21592	9.21012	9.34056	9.42357	9.55053
EMC6	8.01512	8.49497	8.03254	7.8553	8.29682	8.18961	7.71583	8.13444	8.05665	8.35558	8.04674	8.34439	8.21975	7.7972	8.07901	8.09404	8.09451	7.93877	8.16247	7.60585	8.02143	7.84455	7.87421	7.78963	7.71908	8.29452	8.42458	8.4194	8.19054	7.7207	9.19041	8.88772	8.99593	9.02065	7.96132	7.9518
EMC7	9.41435	9.97097	9.68876	9.79696	9.58439	9.85948	9.56425	9.96002	9.91587	9.96081	9.74288	9.83072	9.8092	9.89128	9.77411	10.2561	9.99435	10.3505	10.313	9.75012	9.75031	9.78066	9.66669	9.83583	9.57656	10.0292	10.2128	10.411	9.85832	9.53106	9.12168	9.22025	9.09364	9.18632	9.5057	9.70633
EMC8	7.5743	8.08204	7.72894	7.75685	7.84146	7.89719	7.79313	7.92343	7.83298	8.73232	8.16608	8.67949	8.51342	7.89242	7.91544	8.39048	8.27024	8.36363	8.5251	7.75617	8.05061	7.77914	7.67658	7.79725	7.56983	8.90874	8.63458	8.61538	8.96902	7.36979	8.13013	7.92285	8.11061	7.79593	7.60221	7.57046
EMC9	6.33197	7.07138	6.17043	6.56706	6.39419	6.49091	6.54277	6.84737	6.45002	7.72839	6.82041	7.21507	7.08232	6.42011	6.16578	6.31749	6.22423	6.39268	6.43214	6.01447	7.0014	6.28876	6.29989	6.54086	6.37693	7.27793	7.28297	7.4384	7.05285	6.50102	8.17943	7.86826	8.20106	8.01252	6.52095	6.45356
EME1	5.27621	5.59583	4.95342	4.93181	5.2463	5.12696	5.03835	5.6435	4.97152	6.19943	5.53556	6.25597	6.45274	5.30819	5.31977	6.14559	6.04702	6.06945	6.36583	4.91001	5.65519	5.06671	5.10927	5.41191	5.01865	7.06695	6.89057	6.90783	6.65473	5.26193	7.26326	6.94073	7.19566	7.02174	5.30714	5.44869
EME2	6.64008	6.19319	6.41368	6.32364	6.36644	6.36307	6.17628	6.39944	6.16041	6.28487	5.67854	5.48746	5.90897	6.0598	6.43723	5.77521	5.94582	5.5978	6.26127	6.24543	6.39799	6.34195	5.96196	6.22791	6.30552	5.40344	5.62601	5.62008	5.64896	6.53394	5.19016	5.20614	5.37627	5.36703	6.73258	6.24919
EMCN	9.0502	9.12425	9.37682	9.967	8.90187	8.30645	8.67137	8.3605	9.65048	5.37055	6.76559	4.1799	4.72875	9.53685	8.72774	5.15062	5.96627	4.47236	5.16378	9.44727	8.50543	9.04888	9.98238	8.64177	9.30581	3.76679	4.72034	4.38817	4.26622	9.33145	5.45701	5.86321	5.33896	4.37086	8.88347	8.73743
EMG1	7.96539	8.75893	8.0481	8.04276	8.10032	8.29323	7.75473	8.22832	8.10493	9.10691	8.22152	9.02747	8.49807	8.03242	8.12249	8.78517	8.53371	8.85234	9.08715	8.2856	7.89884	8.08436	7.92357	7.94796	8.06875	9.30914	9.24758	9.25474	8.86707	7.93903	9.646	9.27527	9.46134	9.31032	7.93278	7.91882
EML1	7.02595	7.0007	7.39663	7.90933	7.08851	6.86168	6.79313	6.73736	7.26429	5.84243	5.51123	6.59717	6.53545	6.9829	7.10219	5.13057	5.15575	5.50952	5.32978	7.24907	6.1748	7.31892	7.92287	7.01412	7.28741	4.28778	4.27255	4.16303	4.59695	6.79587	3.86663	4.5757	3.91337	4.57041	6.87693	6.82646
EML2	6.40067	6.81258	6.43292	6.01533	5.9649	6.11522	6.18802	6.41296	6.50462	7.0879	6.69626	6.81799	6.6034	6.32111	6.52596	6.9558	6.87467	7.24557	7.04658	6.359	6.61016	6.51601	6.33323	6.47173	6.42157	7.45521	7.25695	7.25433	7.50807	6.34378	7.13858	6.93173	7.01751	6.99591	6.23676	6.40465
EML3	7.69882	7.52444	7.41671	7.2923	7.31536	7.30849	7.89549	7.41476	7.1558	7.35455	7.39173	7.14837	7.37104	7.34705	7.54048	7.57836	7.41513	7.54906	7.58444	7.09976	7.4091	7.39098	7.57911	7.57095	7.53421	7.00919	7.16646	7.31754	6.82826	7.58725	6.82155	6.9507	6.94894	6.91211	7.5086	7.64334
EML4	6.21776	6.4926	6.80231	6.69314	7.35641	6.93052	7.15372	6.74552	6.93008	6.88603	6.68112	6.85546	6.30843	6.8614	6.85561	6.3428	5.98031	6.2441	6.00616	6.97386	6.7193	6.71469	6.52586	7.14	6.72114	7.30523	6.91951	7.17788	6.67402	6.69996	7.1485	6.71269	6.95115	7.26644	7.02078	6.93414
EML6	3.99698	4.58674	4.47112	4.20329	4.16262	4.55552	4.03183	4.51351	3.55502	5.91418	4.75456	5.81197	5.87932	4.14795	3.80789	5.43355	5.78579	5.94028	6.03949	3.47562	4.17423	3.71444	4.08841	3.96932	4.19963	4.38286	4.53682	4.85529	4.30816	4.50837	3.60597	3.80792	3.62576	4.54452	4.84996	4.39285
EMP1	9.16624	7.03008	7.76081	7.75979	10.4926	8.91638	10.2908	7.52513	7.72711	7.37981	7.3276	7.43329	7.38893	9.06707	8.22389	7.67741	7.66019	7.88676	7.68409	8.80908	8.36639	8.41109	7.46803	6.9578	8.39689	6.45045	6.19662	6.78544	6.52078	7.85515	6.38093	6.96394	6.28793	6.88455	10.2492	7.87885
EMP2	11.5578	11.8096	12.0186	11.6437	11.3063	11.3528	11.1545	11.3943	12.1403	9.31921	9.40278	9.08064	9.00998	11.5747	11.88	8.23657	8.13502	8.01012	8.20265	11.9381	10.282	11.5822	12.3316	11.6533	11.8409	10.4336	10.4344	10.4954	9.317	11.1286	7.45946	7.77575	7.46021	7.00825	10.9164	11.6181
EMP3	9.05802	10.065	9.35887	9.40162	9.95159	9.44613	9.39905	10.2248	9.0269	9.25101	9.38956	9.07764	9.57261	10.0064	9.27244	8.89043	9.02904	8.73918	8.64134	9.16628	9.27592	9.30593	9.12563	9.80864	9.25414	8.28018	8.83902	8.6821	9.27532	8.90272	8.17301	8.64613	8.18658	8.89457	9.48114	9.77684
EMR1	6.0853	7.77595	5.9011	6.30374	6.5635	5.53882	5.66116	5.53716	5.8194	6.27655	5.38438	6.0503	6.12902	6.80832	5.22867	4.82243	4.68511	4.42708	4.88773	5.36559	5.59848	6.67235	6.71896	5.05404	6.76804	6.35854	6.86004	6.82677	5.40563	6.38727	4.33783	4.37256	4.07814	4.40582	7.71546	6.63753
EMR2	5.89602	5.5283	5.64132	5.7726	7.75272	7.04304	5.89451	6.52856	5.88397	6.81909	6.73861	6.92578	6.68849	6.53568	5.91507	7.03392	7.40353	6.59707	6.92855	5.44892	6.54299	5.4582	5.77995	5.61485	5.63676	6.03222	6.11698	6.04182	6.01515	5.78878	5.60364	6.37719	5.96073	6.19599	6.41069	5.69156
MIR6834 /// PFDN6	5.75883	6.34077	5.79841	5.63844	5.62193	5.65434	5.85862	5.85876	5.94764	6.70518	6.22736	6.66356	6.48977	6.01008	5.99351	6.31305	6.21175	6.18241	6.41339	5.90881	6.07795	6.15735	5.62219	5.91006	5.81092	6.7543	6.62929	6.37368	6.7417	5.76853	7.4827	6.87493	7.27157	6.99103	5.85657	5.77847
TFCP2	6.49508	6.49518	6.6569	6.58006	6.18734	6.41176	6.47844	6.55568	6.48039	6.95034	6.76134	6.97096	6.9214	6.46499	6.52314	6.41403	6.39023	6.5639	6.44749	6.6544	6.75712	6.61687	6.65794	6.57133	6.37861	6.85187	7.05908	7.0554	6.52268	6.49511	7.23887	6.98395	7.19464	7.02922	6.5085	6.33482
ENC1	7.0318	6.91509	7.60506	6.95206	6.39588	6.56407	7.3255	6.23041	6.85829	7.79569	7.92996	8.60761	8.36137	6.63014	6.66187	8.35397	8.21836	7.66344	8.01407	6.46949	7.90199	6.9841	7.48616	6.61857	6.6402	6.61667	6.79616	6.01149	6.64607	6.74779	6.85718	7.37625	7.04061	7.55838	6.59552	6.80088
ENAH	7.7536	7.29445	8.01521	7.77548	7.95626	7.45297	7.92563	7.647	7.66401	6.22083	6.4573	6.46401	6.87575	7.46996	7.07839	6.70193	6.25351	6.48278	6.80758	7.76699	7.51506	7.61457	7.86646	7.31996	7.8788	5.34554	5.03524	4.69257	5.33771	8.26777	5.99784	5.85271	5.7658	6.41625	7.8004	8.05252
ENHO	4.81332	4.95702	5.14756	5.02711	5.09322	5.20956	5.09581	5.16558	5.22693	5.42701	5.15325	5.3168	5.16548	4.84633	5.17635	5.15479	5.03291	5.29656	5.09612	4.64027	4.97953	5.22468	6.10561	5.24212	5.4757	5.09014	5.26093	5.40584	5.65823	4.64235	5.24752	5.26174	5.15383	5.1324	4.96632	5.09763
ENO1	9.45561	10.087	9.96945	10.0486	9.94769	9.76146	9.94587	10.237	9.93754	11.1165	10.5896	10.8111	10.3474	10.3	10.0128	10.8336	10.5399	10.9142	10.844	10.0546	10.2904	10.1792	9.40743	10.4724	9.81965	11.0524	10.8513	11.0316	11.1198	9.56663	11.5993	11.6121	11.7361	12.0321	9.69203	9.97701
ENO2	7.31277	7.28581	7.17449	7.35982	7.26879	7.66011	6.7557	7.49146	7.06649	8.24466	7.2899	7.67212	8.04391	7.14843	7.06053	8.14776	6.84172	8.87474	7.76876	7.1826	6.4722	7.24488	7.34515	7.34888	7.54231	7.40821	7.38576	7.08929	7.78939	7.25747	8.55004	8.93754	8.45263	10.1381	7.03758	7.18623
ENO3	4.98954	5.22633	5.14921	4.96494	4.88713	5.34501	4.59782	5.22931	5.08294	5.68605	5.10481	5.28944	5.49134	5.0678	5.09524	5.37568	5.16005	5.29531	4.82169	4.76695	5.13942	5.05254	4.82323	5.18147	5.17304	5.2862	5.27239	5.27089	5.43207	4.98212	6.35813	6.38764	6.39105	6.62805	5.04769	5.21085
ENSA	6.69883	7.04094	6.90772	7.07109	6.84911	6.5488	7.02217	6.40247	7.10878	7.37563	7.21143	7.4506	6.99288	7.21151	6.91778	6.87149	6.87999	7.21601	7.00111	6.99202	6.7256	7.21279	6.92401	6.82792	6.86788	7.5914	7.27573	7.44991	7.45539	6.74856	7.82071	7.66691	7.83935	7.48878	6.79729	6.67244
ENY2	6.87041	7.22229	6.90691	6.85747	6.98285	6.83899	7.27502	7.04645	7.1045	7.69732	7.02597	8.10379	7.77143	7.29456	6.79749	5.98559	6.14355	6.07369	6.07423	7.31583	6.66665	6.98988	6.87438	6.85912	7.0336	6.99802	6.79612	6.53992	6.46515	6.72813	7.54176	7.26702	7.59282	7.50943	7.0942	6.77972
EOGT	8.04792	7.25577	8.15499	8.18241	8.76035	7.5216	8.12442	7.51495	8.06347	7.67457	7.0687	7.45665	7.45956	7.98379	7.66908	6.97699	7.19055	7.08857	7.10724	7.93234	7.83854	8.19743	8.21896	7.90728	7.9288	5.69466	5.97165	5.69515	5.31625	7.96198	6.85863	7.06487	6.89987	7.13686	8.47672	7.71323
F11R	8.00613	8.30593	8.04629	7.91561	7.98656	7.64701	8.1628	7.6945	8.40103	9.18755	8.16197	8.93164	8.51656	8.35939	8.27829	9.28286	8.64648	9.43003	9.16958	8.40433	7.55461	8.39091	7.79957	8.15739	8.30842	10.2819	9.82988	9.71609	10.0587	7.87759	9.64834	9.38626	9.52815	9.50999	8.09157	8.00293
EPC1	8.44756	8.47005	8.36076	8.46527	8.08482	8.25974	8.29646	8.34656	8.37283	7.6905	7.98973	7.97129	7.96528	8.58346	8.14936	7.33918	7.64186	7.09322	7.23967	8.3678	8.24455	8.43316	8.78519	8.22142	8.31412	7.72479	7.76622	7.55064	7.36261	8.46488	7.90267	7.86863	7.82099	8.03496	8.48795	8.17113
EPC2	7.01049	7.18717	7.24728	7.2492	6.86943	6.78536	6.96327	6.91233	7.09477	6.39554	7.12146	6.78117	6.5256	7.0671	6.85534	6.52683	6.57205	6.61847	6.5839	7.39093	6.97502	7.13237	7.38001	6.97209	6.96501	7.08337	6.95335	6.76323	6.62098	7.01315	6.37521	6.5266	6.51776	6.64615	6.85353	6.56069
RAB27A	8.06713	7.67243	7.57524	7.74275	9.04647	8.60814	8.05919	7.91007	7.75809	8.36753	8.50287	8.18876	7.94173	8.36709	7.95734	8.2009	8.08277	7.98	8.19202	8.0357	8.00665	7.97985	7.53215	7.9575	8.09434	7.6548	8.0177	7.69644	7.45366	7.58853	7.23722	7.39723	7.21104	7.13086	8.42108	7.71061
RAB27B	6.30123	6.50098	6.4574	6.17657	6.97283	6.85892	5.72748	6.81432	6.19371	6.07359	6.10043	5.59451	5.63909	6.27689	6.7906	6.78006	6.49823	6.44364	6.57638	6.48783	5.49333	6.12784	5.62799	6.26114	6.39158	6.80545	6.62816	6.62946	6.07339	5.96955	7.05261	7.0386	7.17573	6.48701	5.74367	6.10284
RAB22A	7.53967	7.35993	7.68175	7.55842	7.86532	7.4326	7.70988	7.6421	7.69482	7.75719	7.61802	7.71693	7.66534	7.53941	7.46309	8.51236	8.1112	8.61651	8.39605	7.65003	7.60329	7.60275	7.65967	7.56171	7.53665	8.03627	7.64475	7.29552	7.94415	7.37152	8.14381	8.17792	8.15932	8.36489	7.54214	7.37666
EPG5	6.96711	6.30626	6.97301	6.92262	6.73108	6.30648	6.5322	6.93483	7.00607	5.45725	5.90764	5.72402	5.92632	6.59334	6.70901	5.16878	5.46287	4.96678	5.28379	6.71953	6.37878	6.75661	7.03407	6.81053	6.72342	4.41973	5.16019	5.04422	4.72873	6.86109	5.75173	5.60814	5.5712	5.69963	6.54119	6.73412
EPN1	6.43993	6.62353	6.32175	6.35327	6.34206	6.48693	6.55942	6.61364	6.23218	6.63489	6.85536	6.66907	6.97347	6.24965	6.47107	7.33651	6.96527	7.43775	7.12796	6.41918	6.34595	6.44788	6.28375	6.69035	6.46209	7.06479	7.13649	7.14456	7.44879	6.16648	6.97312	6.89847	6.86793	6.93724	6.37419	6.63564
EPN3	4.43478	5.01957	4.34995	3.69386	4.13171	4.14596	4.03566	4.0509	3.97668	6.97002	5.32721	6.82015	7.01416	3.94598	3.96118	6.16025	5.77355	6.50513	6.14164	3.65937	3.97369	3.98295	3.94088	4.38407	4.39778	6.94616	6.61489	6.67855	6.23557	4.27849	6.89529	6.43551	6.85845	6.19457	3.9891	4.4888
MIR4800 /// MXD4	7.50324	7.67472	7.37208	7.86141	7.10513	7.26474	7.77924	7.48941	7.78287	6.74856	7.45684	6.85357	7.18252	7.29566	7.76667	7.22198	7.48811	7.01671	7.18425	7.79154	7.57901	7.6149	7.8262	7.74529	7.66679	6.79386	6.89184	6.71269	6.81535	7.54478	6.54529	6.74099	6.81136	6.48137	7.16205	7.59732
EPOR	6.75747	6.49935	6.51896	6.44179	6.12804	6.47752	6.59633	6.26835	6.32761	5.39686	5.70768	5.27538	5.30412	6.05119	6.4383	5.44002	5.45762	5.43605	5.33212	6.33089	6.33821	6.43813	6.77226	6.74175	6.817	5.31007	5.48835	5.3275	5.67624	6.39238	5.41701	5.39587	5.19294	5.33114	5.97182	6.1771
EPRS	7.84113	8.26112	8.12665	8.19804	7.61128	7.92924	8.017	7.85051	8.01028	8.74163	8.58896	8.64228	8.50135	7.96521	7.97519	9.06923	8.90341	9.1775	9.19106	8.29786	8.18251	7.85572	7.83667	7.86499	7.79422	9.08576	9.0739	8.97509	8.85178	7.73705	8.74607	8.75089	8.86253	8.84177	7.80664	7.78981
EPS8	9.79918	9.8066	9.35275	9.48488	9.95953	9.92331	9.37037	9.65899	9.21906	8.83268	9.45273	8.69568	8.56167	9.50193	9.60931	7.98504	9.06968	8.45381	8.24511	9.59474	9.60815	9.66754	9.25032	9.55327	9.75189	7.26439	7.81817	7.94194	6.74638	9.57644	9.18922	9.0726	9.06709	8.68586	9.87402	9.47879
EPT1	5.63888	5.51751	5.26224	5.55526	5.95764	5.89869	5.59335	5.60473	5.62005	7.50925	6.3793	7.49705	7.097	5.85247	5.70313	7.14079	6.79091	7.51662	7.49424	5.69663	5.62783	5.67875	5.2902	5.44519	5.63438	7.63922	7.28775	7.46814	7.41429	5.49782	7.52767	7.31027	7.55173	7.24262	5.83849	5.51857
EPYC	2.38625	2.37021	2.45469	2.34499	2.369	2.33724	2.48583	2.2867	2.2411	2.37588	2.46044	2.72021	3.19174	2.45665	2.27231	2.72161	2.46196	2.48473	2.51001	2.44754	3.4232	2.30429	2.5019	2.5255	2.49826	2.70665	2.4812	2.45761	2.75217	2.53184	2.40303	2.33491	2.48471	2.1634	2.62914	2.2466
MAFG-AS1	5.68938	6.25363	5.82715	5.58007	5.60361	5.82919	5.77845	5.79531	5.63147	6.66959	6.31434	6.78231	6.82268	5.38512	5.81009	6.18305	6.03393	6.18296	5.82348	5.59531	5.95634	5.75186	5.52883	5.90274	5.51637	6.71128	6.86923	6.92102	6.64101	5.72704	6.89993	6.64681	6.70617	6.87345	5.69531	5.65313
TFDP1	5.68096	6.09965	5.75226	5.71361	5.89721	5.84093	6.32475	5.77721	6.09103	7.72813	6.47412	7.25983	6.61392	5.81125	5.82313	6.22808	6.21532	6.03109	6.12505	5.87487	6.01688	6.06396	5.90799	5.92858	5.76682	7.69897	7.22901	6.95654	7.328	5.77727	6.85601	6.54533	6.74924	6.32308	5.75172	5.77641
TFDP2	6.54519	6.55079	6.35487	6.4637	6.45987	6.44498	6.60532	6.52134	6.48272	6.59905	6.82151	6.72579	7.00757	6.79046	6.81097	6.74008	6.85501	6.77904	6.8604	6.2874	6.64108	6.41804	6.611	6.23004	6.44741	6.92095	6.82698	6.29224	6.19701	6.51118	7.08974	6.75091	7.16554	6.80266	6.61292	6.74764
RAB11A	9.39491	9.42273	9.60759	9.67663	9.5924	9.31485	9.66642	9.43463	9.6085	9.18545	9.2399	8.97538	9.15333	9.53252	9.49369	9.53212	9.37321	9.45008	9.35004	9.40191	9.3826	9.55654	9.74076	9.47509	9.51906	9.24135	9.52202	9.67575	8.59958	9.19133	9.99053	9.86105	9.94557	9.80467	9.34755	9.40676
RAB11B	6.22437	6.45893	6.1411	6.23399	6.09684	6.35342	6.64647	6.80138	6.26525	6.4789	6.75972	6.591	6.55492	6.42949	6.65196	6.91482	6.6945	6.73182	6.82736	6.18839	6.21039	6.16292	6.15045	6.90356	6.40615	6.89427	7.02985	6.90068	7.02778	6.07986	6.52338	6.56216	6.58094	6.84107	6.21077	6.44103
ERC1	6.71709	5.99408	6.8208	5.77471	6.38956	6.2987	7.10632	6.3956	6.9167	5.79776	5.87345	5.93081	5.89486	5.60722	6.5902	5.43826	5.38215	5.45315	5.63104	5.76118	6.47644	6.56103	7.04667	6.39831	5.78301	5.12899	5.16985	5.29917	5.0385	5.14033	5.98135	6.18459	6.077	5.87554	6.12041	5.34893
EREG	7.54302	3.27977	3.89117	3.99994	7.39547	7.9146	6.19515	5.3341	4.53589	5.61078	3.11934	3.03045	2.98496	6.38496	6.3754	4.56289	6.8832	4.46851	5.32921	3.70901	6.04758	5.08454	3.25371	3.25698	5.16043	2.90011	2.94482	3.33585	2.70242	3.06318	3.01671	3.71486	3.11979	3.17739	7.68059	6.23106
ERI1	6.84744	7.03973	7.06372	6.74417	7.45656	6.70513	6.91972	7.32468	6.90405	6.96179	7.13407	6.78045	6.85443	7.27942	6.74751	6.35732	6.79447	5.8543	6.51625	6.77519	7.17331	6.97272	6.64242	6.94583	6.70629	6.2823	6.37705	6.40794	6.32399	6.79617	6.62762	6.72853	6.71662	6.63812	7.19946	7.0173
ERI2	6.76495	6.91378	6.8965	6.88062	6.12132	6.42427	6.15559	6.99316	6.98816	7.59717	6.35599	7.28064	6.88015	6.34363	6.89687	6.8765	6.71705	6.96278	7.05264	6.73393	6.40553	6.87865	6.9591	6.90892	6.71814	7.91074	7.70032	7.70895	7.13874	6.70835	7.75324	7.39001	7.77826	7.36164	6.77252	6.90936
ERI3	6.47561	7.08492	6.54284	6.53794	6.08358	6.16085	7.04802	6.6305	6.41543	7.27068	7.07991	6.87079	7.25374	6.71067	6.83551	7.22	7.0986	7.42585	7.34349	6.7717	6.58924	6.73033	6.59668	6.82385	6.80916	6.99945	7.11472	7.46308	6.83615	6.33623	7.88047	7.48547	7.86381	7.77303	6.42911	6.73405
CSRP2BP /// PET117	6.32823	6.74082	6.58803	6.61111	4.93189	5.96643	5.62785	6.60263	6.49644	6.688	6.34162	6.85676	6.78711	5.94965	6.19466	5.5693	5.73862	5.57344	5.83117	5.98576	6.30117	6.59236	6.63209	6.36751	6.29682	6.50347	6.61376	6.72074	6.1607	6.58681	7.01045	6.8648	7.01832	6.6521	6.01209	6.12213
BAALC	5.53315	5.66412	6.41406	6.29892	5.28199	4.82412	6.23778	5.09409	6.80363	4.00663	4.54742	3.98911	4.21079	5.07318	4.97621	4.15518	4.49692	4.07526	4.08852	5.88301	5.65928	5.6704	6.9986	5.60075	5.30878	4.15691	4.6052	4.9122	3.98336	5.6082	5.94039	6.0775	5.96688	5.51543	5.26276	5.39421
DIMT1	8.02428	8.31635	7.87842	7.86664	8.52551	8.1701	8.09338	8.28735	7.99088	8.29317	8.31139	8.4766	8.42902	8.24522	8.04384	8.31474	8.6487	8.26429	8.47443	8.36938	8.54297	8.16036	7.88662	7.9972	8.00341	8.66201	8.73108	8.84126	8.32909	7.90349	8.53307	8.47002	8.40378	8.17894	8.35582	7.96027
ERN1	7.25572	6.17333	5.75456	5.82156	8.35058	7.88158	6.58279	6.22783	6.13087	6.5191	7.16348	6.62326	6.62484	7.12724	7.02171	6.10763	6.66347	6.30082	6.49497	6.41414	6.85501	6.42544	6.13202	5.49331	6.56396	6.9174	7.24551	7.1559	6.64468	6.4887	6.02678	6.52817	6.25203	6.14261	7.3335	6.14177
ERN2	6.10926	6.59611	6.23936	6.14748	6.23376	6.2631	6.07615	6.4247	6.11307	6.18131	6.37117	6.19939	6.27911	6.22851	6.31102	6.5055	6.51925	6.50214	6.32831	6.16902	6.22494	6.11789	6.03357	6.45411	6.45678	6.33916	6.3779	6.50875	6.6829	6.56094	6.2122	6.23133	6.19309	6.22327	6.43221	6.60764
BACH1	8.0511	7.38211	8.15035	7.93352	8.93161	8.17425	8.18138	7.91349	7.94154	8.11358	7.81371	8.10675	8.07871	8.22573	7.98847	7.98718	8.04878	8.16988	7.78857	8.14987	7.75191	7.88826	7.69898	8.31289	7.75955	7.31123	7.43248	7.71687	7.18497	7.74316	7.99515	8.21566	7.94532	8.46295	8.4391	7.98327
BACH2	5.38854	4.66004	5.49205	6.04758	5.28571	5.19916	5.61029	4.9788	5.93561	5.17683	5.52267	5.80841	5.78129	4.89031	5.33092	5.4701	5.4404	5.19641	5.19863	5.5331	4.98854	5.58356	6.16097	5.12879	5.46478	3.97068	4.71805	4.84887	4.3769	5.63819	5.33119	5.06393	5.17145	5.23816	5.21284	4.96676
DIP2A	7.1223	6.3686	7.20749	7.25769	6.74788	6.52142	6.76491	6.53357	7.15414	6.592	6.30065	6.36235	6.6297	6.80691	6.87292	6.51015	6.73042	6.80031	6.81068	7.2884	6.77594	7.0239	7.04058	6.87737	7.00935	6.4345	6.51573	6.44735	5.77015	7.30228	6.04816	6.18849	6.24011	6.18731	7.03484	7.00459
DIP2B	8.06844	7.0811	7.68658	7.91388	7.6244	7.91409	7.72794	7.99784	8.02901	8.45365	7.8922	8.39322	8.38103	7.45484	7.80669	9.11081	8.95406	9.44139	9.21339	7.67884	7.85532	7.92121	7.93673	7.74482	7.81482	8.27646	8.48073	8.70191	7.81883	7.66009	8.49991	8.51546	8.44167	9.13378	7.51418	7.89523
DIP2C	7.74003	7.08458	7.54803	7.40732	7.51883	7.21963	7.69101	7.08868	7.4987	7.21013	6.64899	7.54553	7.41757	7.41215	7.13808	7.03798	6.80506	7.12406	7.10492	7.6039	7.22407	7.45666	7.66284	6.67641	7.41781	7.20893	7.49845	7.72544	6.40757	7.90323	7.00867	7.01045	6.99369	7.49037	7.59537	7.3914
BACE1	7.06024	6.89875	6.97364	6.9089	6.7002	7.1022	7.04631	6.79661	7.08643	7.74679	6.96067	7.45606	7.32347	6.76679	7.05267	7.33862	6.88478	7.37823	7.20121	6.71186	7.06788	6.84044	6.84464	6.91932	6.70733	6.0191	6.03353	5.82362	6.16209	6.7346	5.49842	6.16532	5.80869	6.28065	7.05722	6.96013
BACE2	7.92541	8.36019	7.71874	7.60114	7.77016	7.2888	8.51526	7.74488	7.63182	8.87002	8.17348	8.61046	8.72652	7.46113	8.00563	9.29921	9.13084	9.2784	9.18769	7.4487	8.6374	7.89284	6.99911	7.06826	7.40963	8.28048	8.36113	8.61298	7.87451	7.76321	8.14929	7.95583	7.73705	7.92241	7.86582	7.82389
ESAM	9.38738	9.44309	9.34649	9.87807	9.28562	9.21998	9.91515	9.21885	9.5166	7.0245	8.32476	6.49006	6.924	9.24891	9.37075	7.49094	7.73469	7.13289	7.64303	9.42398	9.3385	9.28157	9.82559	9.63989	9.52763	6.17928	6.4002	6.26535	6.45145	9.02509	7.23755	7.36865	7.06504	6.69599	9.12687	9.19404
RNPEPL1	7.17338	7.71346	7.17494	7.24932	6.89551	7.46442	7.3343	7.84594	7.13795	6.67185	7.43421	6.73095	7.34133	7.03594	7.58486	7.87104	7.71356	7.84782	7.60896	7.09331	7.14329	7.17918	7.35976	7.77283	7.43366	7.01267	7.27491	7.19199	7.34285	6.98117	6.99375	7.02434	6.98606	6.83311	6.90136	7.48914
ESF1	5.88158	5.53433	6.15658	6.07276	5.93422	5.71191	5.84267	5.6193	5.95591	6.66306	6.10188	6.55324	6.44237	5.93294	5.77134	6.00622	5.96268	6.37306	6.42395	6.49348	6.20068	6.01425	6.00998	5.83719	5.90707	6.2372	6.4059	6.3511	5.7601	6.06591	7.08954	7.05535	7.19544	7.41981	6.01	5.58434
ESM1	6.76163	5.53491	4.6951	4.87111	6.14219	4.94784	8.02908	3.68813	5.4266	5.14175	5.40583	4.70729	4.11032	5.01631	4.35976	6.98238	5.27118	6.82756	6.68628	4.56945	7.87549	4.70424	5.04008	4.09424	4.4591	3.96547	3.69573	3.52523	3.47408	3.89444	5.9044	5.88052	5.31621	6.45513	4.65907	3.97987
ESPN	4.20404	4.73984	4.07039	3.94955	4.23077	4.30163	4.1682	4.46343	3.64852	6.30311	5.07429	5.64991	5.8959	4.22634	4.32136	6.0457	5.58218	6.24648	5.98664	4.05472	4.1749	4.01589	4.06877	4.49874	4.34828	5.7065	5.38221	5.39461	5.2413	4.28733	5.72243	5.10984	5.49107	5.43742	4.32206	4.36323
KCTD1	5.86518	7.03767	6.46665	6.09986	5.75065	5.89753	6.03254	6.37533	5.89562	7.54861	6.56293	7.81031	7.56057	5.91396	6.30886	8.60885	8.16553	9.0057	8.78414	5.97519	6.29266	5.98801	6.073	6.16937	6.23645	9.25813	9.19332	9.38636	8.44252	6.36722	8.05219	7.91856	8.11735	8.30487	6.32825	6.49176
KCTD2	7.44008	7.31639	7.43531	7.4838	7.3399	7.39657	7.2494	7.37764	7.34624	6.93264	7.12606	7.01793	7.03238	7.18929	7.34261	7.3305	7.00653	7.31037	7.25125	7.2437	7.29395	7.2871	7.53788	7.39265	7.33583	6.97526	6.8835	6.84845	7.07802	7.26104	7.35626	7.18151	7.29799	7.3061	7.10224	7.29353
KCTD3	7.65687	7.29179	7.59686	7.68331	7.2974	7.21432	7.46074	7.08259	7.71155	7.88638	7.29493	7.78212	7.95277	7.25595	7.51724	7.48586	7.51443	7.79415	7.65525	7.9717	7.45936	7.90597	8.29303	7.24557	7.50439	8.22574	8.06847	7.78486	7.72	7.25126	7.69466	7.86379	7.94757	7.58957	7.3132	7.10405
KCTD5	6.13765	6.45438	6.13665	6.319	6.47628	6.68338	6.3173	6.72226	6.43435	7.06777	6.74914	6.86512	6.62159	6.3556	6.54635	6.91622	6.68894	6.84234	7.00267	6.00084	6.67867	6.31336	6.40165	6.92633	6.23423	6.71809	6.77722	7.01123	6.70102	5.99649	6.80574	6.78719	6.93218	6.76089	6.20105	6.18451
KCTD6	5.82836	6.35615	6.07397	6.29544	5.97902	5.76765	6.02631	6.04349	6.27835	5.53926	5.64691	5.68092	5.87827	6.25934	5.94374	5.00618	5.29234	4.84494	5.03989	6.33654	6.16859	6.40304	6.41087	6.26861	5.66724	5.50938	5.46318	5.45418	5.10452	6.33295	6.27946	6.00147	6.13303	5.79638	5.95207	5.64135
ESR1	4.93333	5.25996	5.13458	5.22261	5.28263	5.46271	5.19273	5.57337	5.11157	5.27742	5.41521	5.49339	5.42811	5.10478	5.39996	5.45632	5.59094	5.48759	5.45553	5.27214	5.39013	5.24093	5.03275	5.36217	5.08915	5.64709	5.34804	5.40073	5.91638	5.1422	5.41715	5.08561	5.27262	5.42825	5.1953	5.32824
ETFA	8.54212	8.98128	8.8467	8.97286	8.55914	8.69978	8.66725	8.8998	9.01851	9.49609	9.30065	9.59619	9.23858	8.90386	8.98284	9.17465	9.08033	9.10666	9.06987	8.94396	9.09849	8.92482	8.80699	8.96762	8.68023	9.63864	9.7669	9.96357	9.116	8.57853	10.2002	10.0463	10.1547	9.98477	8.6934	8.7322
ETFB	8.48837	9.17335	8.94573	8.60558	8.38435	8.64931	8.2218	8.56989	8.58603	9.03631	8.36604	8.4634	8.24095	8.4358	8.51053	8.60923	8.47455	8.3751	8.60773	8.32916	8.46753	8.45837	8.43786	8.33871	8.36521	8.95914	9.04678	9.12243	8.46788	8.50529	9.28422	8.97717	9.1994	8.9347	8.57832	8.66894
ETF1	9.23658	9.01624	9.0956	8.95656	9.63518	9.20455	9.2187	9.03274	9.23112	8.88447	8.60672	8.76534	8.67227	9.32315	9.11687	9.00687	8.94144	8.95555	9.09779	9.21463	8.92256	9.12579	8.93021	8.93364	9.12023	8.78561	8.81208	8.96429	8.36071	8.66078	8.82793	8.65512	8.76948	8.57742	9.43438	8.89465
ETS1	6.53831	5.6689	6.24743	6.36691	8.31214	6.10908	6.97247	5.62118	6.25116	5.78674	6.72072	6.05482	5.63691	7.04513	6.04127	6.33959	6.17889	5.85727	6.00961	6.27145	6.79943	6.47285	6.3251	5.61036	6.27002	4.9339	5.43661	5.15041	5.18878	6.21635	4.91579	4.93695	4.9058	4.79881	6.94303	5.8246
ETS2	9.79505	8.88812	9.29938	9.78452	10.5949	9.8925	9.86942	8.65679	9.70605	8.49724	8.61725	8.45992	8.23678	9.89835	9.57496	8.81657	8.86241	9.14289	8.94474	9.40811	8.98403	9.59168	9.83123	8.83811	9.61641	8.22524	8.61116	8.73174	7.18407	9.28129	9.44958	9.39027	9.43415	9.7199	10.1069	9.28368
ETV1	6.15401	6.04864	5.85941	6.54107	5.92794	6.05067	6.54905	6.26393	6.41691	5.21647	5.73468	5.23857	5.00742	6.24481	6.25895	5.47896	5.26912	5.17546	5.2777	7.0912	6.05698	6.38749	6.43065	6.78052	6.21719	5.12415	5.24795	5.36136	5.00371	6.41922	5.47135	5.86485	6.06077	5.864	6.21029	6.02253
ETV4	4.83523	5.17911	4.71118	4.86451	4.75875	4.90161	5.59056	5.14263	5.2293	6.60246	5.74213	6.10103	6.3279	5.12175	4.9207	6.05645	5.86579	6.13954	6.13115	4.77107	5.1961	5.04366	5.01973	5.02272	5.06576	6.62996	6.50798	6.7725	6.72725	5.04222	6.35995	6.07611	6.28913	6.55764	4.83421	4.98011
ETV5	7.26333	8.41715	7.97127	7.78603	6.63412	6.85746	7.48553	6.89543	7.61355	6.88847	6.7184	6.66762	6.29605	7.7687	7.48011	6.78769	6.76347	7.31573	7.03954	8.24238	6.85538	7.90938	7.89042	7.0354	7.74741	7.01409	7.10682	6.55331	7.09842	7.6039	6.87821	7.01675	6.8182	7.31207	6.54015	7.28838
ETV6	6.94131	5.77428	6.37581	6.47296	7.57542	6.51942	7.14629	6.66795	6.49521	6.81006	6.65394	6.66211	6.56089	6.86278	6.44158	6.60243	6.69788	6.5897	6.57871	6.41817	6.60282	6.74703	6.26254	6.67879	6.73545	6.77268	6.92402	6.94632	6.54714	7.01744	5.93904	5.9722	5.9081	5.86873	7.05363	6.94442
ETV7	4.6123	4.7725	4.55944	4.51195	5.30444	5.13344	4.96899	5.34693	4.85187	6.46062	5.84634	6.71739	6.73963	5.38852	4.59337	4.91318	4.8948	4.82423	4.99008	4.7034	5.09477	5.36962	4.81678	4.75337	4.75097	6.43963	6.43197	6.09511	6.51282	5.15598	4.65964	4.90664	4.88212	4.70955	5.19858	4.7327
MCM3AP-AS1	4.27666	4.12382	4.24267	4.13789	4.12526	3.81709	3.97931	3.73072	4.19275	4.30114	3.91035	4.28315	4.10563	4.14625	4.11007	4.07175	3.94737	4.11234	4.10832	4.87809	4.12592	4.10454	4.32288	4.21962	4.18447	4.71257	4.5476	4.29205	3.94442	4.55395	4.43305	4.14482	4.48889	4.50606	4.44026	4.00117
ATF7IP2	5.53582	6.41342	5.49391	5.54222	5.47625	5.56165	5.3368	5.84356	5.41222	6.46042	5.96579	6.37552	6.18032	5.4203	5.66581	5.51917	5.83206	5.47966	5.65886	5.5172	5.77057	5.46236	5.61685	5.82166	5.44408	6.17753	6.12579	6.00434	6.1733	5.81997	5.92289	5.56989	5.88439	5.43659	5.96368	5.8883
DIS3L	7.22974	7.01849	7.5204	7.49524	6.3179	6.82498	7.32161	6.97938	7.63222	6.79475	6.96678	6.78263	6.98804	6.86911	7.30724	7.28068	7.34272	7.39225	7.38687	7.81483	7.23566	7.40602	7.49986	7.63279	7.28591	7.36416	7.22836	7.24212	7.11336	7.65357	7.60603	7.65071	7.97184	7.30052	6.72811	7.02441
EVI5	6.10974	6.32295	6.50688	6.51064	6.28939	6.05874	6.15018	5.89419	6.46399	5.82964	6.13119	5.76389	5.55426	6.31271	6.23276	5.72359	6.01168	5.81624	5.89419	6.45068	6.19285	6.2541	6.23288	6.11686	6.12776	5.11968	5.34129	5.1413	5.36967	5.78166	5.61332	5.80313	5.80313	6.08145	6.11808	6.23756
HAUS4 /// MIR4707	8.41494	8.76783	8.29817	8.2041	8.17461	8.51635	8.1182	8.58639	8.58269	8.95279	8.4625	8.60704	8.49981	8.20222	8.64945	7.45581	7.91307	7.3325	7.50909	8.10484	7.9037	8.20435	8.06557	8.19099	8.34523	8.00432	7.88019	8.12194	7.76687	7.96848	8.34763	8.29367	8.51446	7.88843	8.02084	8.38987
EVPL	6.78917	6.83834	7.03719	6.63734	6.32282	6.9389	6.57509	6.82522	6.82357	6.90995	6.52134	6.49657	6.94283	6.56306	6.90922	7.40143	7.03003	7.6049	7.33698	6.81302	5.82802	6.8646	6.85455	7.27773	7.13341	7.25865	7.17376	7.50135	6.71529	6.55954	7.6466	7.51822	7.62551	7.3287	6.10214	6.6792
C20orf27	6.41824	7.4718	6.6153	6.33268	6.08101	6.61182	6.73141	7.21476	6.65426	7.19629	6.80013	6.68059	6.96323	6.53683	6.66177	6.39527	6.53875	6.40688	6.35761	6.24508	6.48925	6.41966	6.47907	7.19785	6.52392	7.23626	7.19614	7.19719	6.80255	6.30503	7.46352	7.14957	7.62081	7.25429	6.65314	6.72755
DIRC2	7.847	7.66698	7.88759	7.9129	7.80709	7.87323	8.09295	7.93685	8.20276	8.43217	7.85743	8.34621	8.03122	8.19036	8.03185	8.92071	8.49063	9.15326	8.83874	8.01482	7.76205	8.0137	7.9421	7.81578	8.05118	8.83328	8.82785	9.17667	8.49059	7.63054	8.81168	8.93587	8.96311	8.81877	7.63091	8.06775
C20orf85	6.37213	10.3084	8.8397	6.27965	7.60086	5.43106	5.8307	8.24195	5.0207	4.31111	5.7747	4.03132	3.61499	7.43895	7.36066	3.7117	8.23567	3.58297	3.446	6.05449	5.9633	4.23317	6.78631	8.03219	8.70157	3.65845	4.22746	3.92389	4.1448	8.80139	4.63104	5.11214	3.95589	3.6641	9.02139	8.88339
RPGRIP1L	3.55035	5.32138	4.40859	3.73895	3.59688	3.42871	3.3204	4.21569	3.44941	4.57312	4.17078	4.23435	4.53705	4.12113	3.5303	4.62891	5.03937	4.96349	4.87164	3.64602	4.62577	3.25298	3.87494	3.70297	4.21171	3.5012	3.50979	3.59316	3.77893	4.05002	3.51811	3.78713	3.92729	4.30978	4.98041	4.04014
EVX1	5.78076	5.9165	5.26662	5.68764	5.47594	5.59852	5.60522	5.88351	5.68617	5.93638	6.21938	6.18681	6.01044	5.62381	5.71384	6.33762	6.10436	6.54919	6.09625	5.78462	5.98093	5.60073	5.73537	5.49413	5.68396	6.43169	6.59186	6.67174	7.04492	5.4673	6.13601	6.25087	6.37487	6.1038	5.94686	5.86298
RAB40B	6.7017	6.82617	6.85606	6.73337	6.219	6.21817	6.51603	6.57117	6.67481	7.05579	6.50299	6.99625	6.99763	6.26083	6.47907	5.97353	6.05752	6.24017	5.82259	6.30247	6.31042	6.53965	6.81078	6.3485	6.52737	7.06511	7.01014	6.95902	6.95741	6.80145	8.23418	7.97099	8.04639	8.26444	6.26412	6.373
RAB40C	7.08513	7.46422	6.97902	6.93473	6.49484	7.05648	6.64085	7.17116	6.88241	7.08388	6.78447	6.91639	6.94409	6.8035	7.0774	6.94924	6.82712	7.18403	6.95812	7.21112	6.65292	7.10423	7.06921	7.02406	7.10909	6.92491	7.20649	7.33391	6.80319	7.01657	7.10316	6.83401	6.99083	6.95284	6.72536	6.92529
RAB3IP	6.14191	4.92379	5.91882	5.55599	5.45885	5.47776	4.96635	5.79197	5.55998	4.79506	4.60125	4.88213	4.83111	5.28247	5.72843	4.65348	4.56141	4.5076	4.75845	5.89971	4.69442	6.14129	5.82993	5.44678	6.36902	5.27256	5.28186	5.09441	4.97362	5.32429	4.36082	4.48109	4.57721	4.2745	5.26559	5.92786
DISP1	7.91968	7.89506	8.24483	8.81547	6.07527	7.4542	7.53996	7.4156	8.55801	4.81529	5.98072	4.98888	5.28566	7.20628	8.08995	5.43818	5.70902	5.48085	5.77784	7.99002	7.1907	8.14884	8.81323	8.36282	8.11692	4.82136	5.16691	5.07183	4.63607	7.75847	5.37335	5.60254	5.57879	5.20181	7.20005	7.67576
DISP2	4.19203	4.96382	4.65375	4.4344	4.28602	5.06285	4.81685	5.21695	4.77971	6.45987	5.17964	5.53497	5.56958	4.68839	4.8441	5.9655	5.5845	5.93257	5.73046	4.45919	4.79849	4.25019	5.03615	4.69623	4.3251	4.52957	4.78311	4.76723	4.62412	4.98353	5.19393	5.23975	5.54304	5.56121	4.73447	4.74991
RRP7A /// RRP7B	4.96993	5.10879	4.96325	5.21886	5.2073	4.96082	5.29069	5.08168	5.32953	5.27684	5.30975	5.44345	5.40993	5.36124	5.02159	5.20848	5.05248	5.15907	5.35113	5.06979	5.22429	5.20409	5.44635	5.31471	5.16156	5.68457	5.35812	5.72499	5.57994	5.50629	5.51227	5.35753	5.52903	5.28279	5.19459	5.05397
CYP4F11	3.02406	3.1964	3.28945	2.87349	2.95079	2.71674	2.88641	3.34926	2.86444	2.72793	2.89221	2.82951	2.82156	2.83208	3.24009	5.19843	5.34158	6.65845	5.91603	2.98846	2.6066	2.76895	3.24938	3.30931	3.74718	4.91275	5.62098	5.30937	4.15453	3.4085	3.04781	3.28257	2.91423	3.23934	3.38802	3.07691
CYP4F12	5.59748	5.82791	5.40171	5.61328	5.53431	5.72633	5.47947	5.81547	5.45197	5.29274	5.4338	5.48706	5.52506	5.48831	5.70891	6.15889	5.65937	5.96846	5.8583	5.74987	5.5444	5.60593	5.69206	5.51049	5.69516	6.28325	6.53777	6.7545	6.19605	5.73042	5.64268	5.58758	5.60061	5.55836	5.31731	5.79509
RAB33A	4.49372	4.82502	4.46203	4.27787	4.56879	4.47744	4.48866	4.75913	4.29495	4.93959	5.71427	5.32023	5.38434	4.72825	4.39566	5.33327	5.20376	4.55158	5.0953	4.00254	5.33946	4.22103	4.74678	4.18147	4.02869	4.66204	5.17387	5.19251	4.59256	4.61508	4.38202	4.6065	4.3955	4.70898	4.09158	4.13431
RAB33B	6.43722	6.73969	6.60463	6.49687	5.83712	6.4544	6.3026	6.05545	6.55038	5.44042	6.00776	5.68991	5.90976	5.69175	6.02258	5.64218	5.56066	5.99783	5.80991	6.40581	5.85132	6.27128	6.87944	6.02371	6.01103	4.98848	5.16514	4.79725	5.15481	6.05419	5.25924	5.64213	5.1694	5.49988	6.05611	5.89675
EXD2	7.32134	7.45042	7.60247	7.55003	7.09412	7.31007	7.32867	7.3915	7.56395	7.31153	7.38845	7.40067	7.4038	7.37712	7.64679	7.10594	7.13286	7.08538	7.21876	7.43895	7.20129	7.44187	7.69751	7.62791	7.52354	6.72629	6.68138	6.54206	6.79251	7.37502	7.51953	7.45713	7.53368	7.15073	7.08258	7.37934
EXD3	5.39311	5.58559	5.5172	5.48895	5.20807	5.47836	5.28599	5.45316	5.58664	5.55944	5.44125	5.40595	5.40435	5.30082	5.44754	5.30736	5.20728	5.36722	5.12139	5.28296	5.51087	5.42906	5.34822	5.37606	5.56179	5.56191	5.62034	5.62327	5.77748	5.44822	5.34441	5.35821	5.37145	5.37298	5.29049	5.24411
G3BP1	7.75921	7.86337	7.95886	7.6295	8.10911	8.14165	7.90675	7.75785	7.9763	8.70938	8.61217	8.62065	8.4949	8.03526	7.75075	8.68392	8.60935	8.83941	8.69316	7.79163	8.48226	7.87494	7.7602	7.73337	7.74297	8.94948	8.87392	8.70051	8.47991	7.52777	8.79225	8.58393	8.75825	8.56984	7.95938	7.72453
G3BP2	7.0973	7.22217	7.20497	7.2237	7.45231	7.42474	7.45994	7.36602	7.31104	7.37801	7.61078	7.33177	7.00829	7.56708	7.30515	7.40962	7.45202	7.4029	7.47679	7.3135	7.44709	7.4499	7.13761	7.44732	7.2567	8.11581	8.31105	8.45667	7.6025	7.08071	7.34646	7.20117	7.50777	7.02848	7.34708	7.09588
EXO1	3.91245	4.07069	3.9833	4.01351	4.1611	3.97511	4.23754	4.47489	4.31948	6.88126	5.57598	7.0211	6.69303	4.37854	4.22449	6.01803	5.5577	5.71975	6.277	4.05313	4.49629	4.13273	4.03614	4.23207	3.9282	7.61995	7.07488	7.0105	7.36032	4.08456	7.1878	6.71713	7.29454	6.26033	4.09334	4.18953
EXO5	6.23448	6.36481	6.28033	6.26449	6.11232	5.77088	5.89084	6.30931	6.26237	6.49995	6.05614	6.29065	6.10917	6.05611	6.05871	6.3824	6.24983	6.21546	6.2656	6.30662	5.94942	6.06645	6.13252	6.17807	5.96149	6.84227	6.78719	6.79857	6.64416	6.37503	6.71568	6.40649	6.61937	6.26967	5.84895	6.07236
BAHD1	6.83497	6.77535	6.78938	7.03043	7.38595	6.97343	7.05184	6.7985	6.76153	6.59916	6.57787	6.39962	6.32169	6.74268	6.76082	6.3436	6.37018	6.30499	6.11749	6.9431	6.82652	6.9169	7.10436	6.99862	6.92738	6.28224	6.44986	6.51325	6.10136	6.65119	6.82064	6.72181	6.78002	6.62784	6.5369	6.53557
EXOG	5.81564	6.10161	5.84251	6.20299	5.83808	5.67321	5.89655	5.66363	5.76078	6.01358	5.89294	6.06446	5.93806	6.35609	6.00194	5.03324	5.53432	5.1047	5.35202	5.8804	5.79238	5.73919	5.59752	5.95853	5.97147	5.25697	5.26766	5.38576	5.13973	5.88513	5.3248	5.42652	5.44148	5.09309	5.72657	5.65803
EXT1	8.17348	7.7311	8.26121	8.06602	8.23596	8.08732	8.8582	7.5958	8.30998	9.1378	8.43591	8.96195	8.77212	8.44137	7.93972	8.70333	8.23318	8.80765	8.76627	8.12	8.2142	8.08474	8.10557	7.9856	8.14311	9.3694	9.23451	9.01049	9.02208	7.80316	8.58953	8.68598	8.67318	9.01659	7.78293	7.96561
EXT2	7.90778	8.02066	7.89031	7.85039	7.51876	7.80387	8.07959	7.36242	7.98338	8.72448	7.83904	8.52738	8.07725	7.89827	7.67353	8.19581	7.62429	8.00629	8.04032	7.67382	8.10126	7.8462	7.87082	7.5785	7.69267	7.10836	7.30633	7.42741	6.96841	7.71297	7.45405	7.61472	7.52912	7.88996	7.82809	7.77693
OTUD4	7.10811	6.98602	7.3193	7.29171	8.18382	7.13924	7.42371	6.99891	7.35152	7.52832	7.40486	7.52765	7.43427	7.57666	7.28148	6.72127	7.12034	6.85182	6.96882	7.43773	7.20679	7.27081	7.44653	7.17641	7.26469	7.29848	7.23176	6.88895	7.21489	7.19352	6.87461	6.77054	6.82008	6.83178	7.43007	7.22077
OTUD5	6.49823	6.51795	6.65299	6.57334	6.25674	6.44207	6.68046	6.45231	6.41212	6.6142	6.65987	6.73817	6.76165	6.48682	6.44746	6.71551	6.66358	7.05181	6.64061	6.59716	6.38827	6.54649	6.64223	6.9024	6.77779	7.25329	7.06293	6.92731	7.25139	6.55569	6.83231	6.8674	6.97349	6.88416	6.23935	6.53565
OTUB2	4.29138	4.68776	4.3523	4.26077	4.07166	4.4406	4.20364	4.70866	4.29166	6.30528	4.76159	5.50135	5.40192	4.48429	4.947	4.9674	4.62603	4.67115	4.65133	4.08396	4.34927	4.43799	4.34255	4.73114	4.41688	5.06772	4.90713	5.08883	5.33462	4.23613	5.53681	5.36357	5.39191	5.56636	4.1575	4.42745
EYA1	3.76332	5.5514	4.47825	3.97669	4.2086	3.64263	3.92266	4.17674	3.68433	3.88041	3.69307	3.90672	4.07912	4.22333	3.94069	4.04564	4.41609	4.45007	4.43441	3.87015	3.9215	3.68377	4.10601	4.01576	4.60236	4.22718	3.97687	3.7329	4.37748	4.67361	4.70795	4.82461	5.13067	5.72003	4.38926	4.47018
EYA2	4.76169	6.01087	4.23444	4.53177	4.67402	4.51575	5.03163	5.03604	4.61861	7.42014	5.89468	7.07752	7.23736	4.90408	4.74501	6.04674	5.92791	6.02944	5.94032	4.07996	4.35149	4.59182	4.48493	4.55544	5.2774	5.96689	5.71723	5.24584	6.08798	5.20574	7.33331	7.10813	7.11237	7.54148	5.42386	5.56016
EYA3	8.22908	7.78659	8.06616	8.19285	8.01409	8.28358	7.93633	8.14279	7.95084	7.78702	8.08995	8.06633	8.23733	8.01854	8.06048	8.08487	8.0326	7.95287	8.19042	8.12799	8.07463	8.13777	8.24757	8.20095	7.99681	8.19267	8.42307	8.54121	8.42146	7.94424	8.505	8.29054	8.50263	8.39314	8.01162	7.86523
EYA4	5.35894	5.57444	4.38803	7.19006	5.78871	3.67396	6.83236	5.84701	7.17567	3.62336	3.69109	3.62478	3.74376	4.96292	5.54449	4.27527	4.79111	4.05027	4.19551	6.8912	4.30643	7.09492	6.09965	5.04203	5.19548	3.89809	3.93617	4.16413	4.20327	5.52051	3.60264	3.46879	3.32492	3.41858	5.38194	5.47773
OTUD1	10.1271	9.31896	9.44095	9.89101	9.64223	9.89814	9.42946	9.51615	10.0957	7.93571	8.36761	8.1715	8.03564	9.72486	9.93593	7.92601	8.04344	7.91352	7.65395	9.49727	8.84231	9.93921	10.0515	9.43963	9.82221	8.2742	8.53687	8.52659	8.14798	9.76095	8.06214	8.53286	8.5796	8.417	9.59751	9.48773
OTUD3	6.58898	5.82756	6.06682	6.25033	6.67191	6.46825	6.48197	6.17871	6.57624	5.40868	5.16569	5.03427	5.59864	5.8847	6.24813	5.59975	5.61362	6.00904	5.95608	6.16714	5.93695	6.3551	6.40047	6.12054	6.3811	5.58529	5.78382	6.20833	5.18405	6.71383	6.33821	5.88522	6.17915	6.12274	6.66234	6.17501
FRAS1	8.34074	7.65491	8.81443	8.47221	7.9991	7.36805	8.67734	7.71462	8.71141	6.94655	6.7842	7.44616	7.35881	8.73944	7.99972	4.21026	4.65025	5.87015	5.01118	8.4146	8.34668	8.56743	8.51396	8.11298	8.39563	7.53993	8.32327	8.90097	5.88385	8.86598	7.21771	7.23398	7.42935	7.37046	8.57409	8.64324
FRAT1	6.88237	6.77797	6.74171	6.87799	6.09894	6.08939	6.32292	7.13593	6.85306	6.3921	6.48637	6.22981	6.17421	6.16932	6.86389	5.60069	6.62972	5.68133	5.81242	7.01897	6.21692	7.01006	6.9187	6.71908	6.73516	6.40826	6.27533	6.1614	6.47149	6.39672	5.39545	5.74149	5.56499	4.77519	6.21735	7.08691
FRAT2	7.15976	7.43691	7.34667	7.48452	7.11448	6.41308	6.35991	7.24526	7.15361	7.12161	7.02924	7.2013	6.9242	6.34821	6.85967	5.9442	6.72358	5.63166	6.10409	7.33068	6.75268	7.25654	7.45749	7.47355	6.91658	7.98399	7.86245	8.08759	7.49134	6.83528	6.78986	6.64142	6.89677	5.94047	6.30496	6.92072
EZH1	8.374	8.2358	8.44088	8.5441	7.68821	8.11329	7.89297	8.09389	8.32284	6.81038	7.41531	6.91995	7.14501	7.95298	8.0744	6.85589	7.04337	7.00525	6.96118	8.38278	7.59484	8.26556	8.77074	8.07633	8.17093	6.63032	6.7434	6.48951	6.46516	8.66904	6.95061	7.14075	7.00234	7.27861	8.11881	8.25707
EZH2	5.14658	5.16796	4.7641	5.18627	5.43167	4.87992	5.45921	5.64064	5.04839	7.9149	6.61242	7.64553	7.50037	5.57012	4.64364	6.40394	6.34298	6.33855	6.65544	4.11887	5.98686	5.07252	5.03092	4.51409	4.59074	8.55394	8.43824	8.23889	7.71631	5.29776	7.60363	7.43862	8.02906	6.95181	5.23441	4.59855
TFPI2	6.67049	6.77879	6.12863	5.59264	7.59272	6.4169	6.75777	5.55081	5.6982	4.84559	4.44318	4.14031	3.60034	6.32882	4.75593	6.15501	6.05187	5.662	5.8835	6.37016	5.69192	4.89775	6.37694	4.73901	4.87067	4.20149	4.3055	3.73728	3.93763	6.00489	3.803	4.04819	3.86478	4.93889	6.70466	4.80205
MLLT1	8.8781	8.59864	8.90145	8.88069	8.73048	8.793	8.7828	8.70457	8.75116	8.47993	8.51762	8.527	8.60442	8.47125	8.81219	8.1882	8.4506	8.14532	8.20393	8.73321	8.69093	8.94828	9.05375	8.87312	8.90794	8.59331	8.61339	8.53916	8.51466	8.69133	8.41634	8.42433	8.48215	8.21608	8.81295	8.7338
MLLT3	6.38655	5.85609	5.92145	5.95774	5.40895	5.98713	5.57402	5.64759	5.84974	5.25568	5.47057	5.45442	5.02416	5.4363	5.71338	4.03192	4.51418	3.93457	4.14522	5.56883	5.36873	5.57377	6.04179	5.39204	5.53157	4.11609	4.87364	4.97568	3.61101	5.84062	5.38103	5.27522	5.57079	5.81923	5.62054	5.45766
MLLT4	7.49397	7.01267	7.68707	7.75211	7.47604	7.0675	7.43236	6.83808	7.40585	6.5765	6.73502	6.61503	6.50005	7.50742	7.52068	7.09518	6.96887	7.19228	6.78576	7.64529	6.71056	7.39722	7.69344	7.51434	7.79384	6.38622	6.29005	6.53409	6.32626	7.52857	6.64825	6.45811	6.36672	6.58886	7.23901	7.21544
MLLT6	7.97986	7.49702	7.81062	7.9119	7.64043	7.71097	7.89736	7.748	7.73412	7.10565	7.64971	7.21959	7.67678	7.33957	7.74701	7.50211	7.4979	7.41395	7.50866	7.85194	7.4311	7.84653	8.10051	7.83733	8.03033	7.44399	7.49938	7.35027	7.57454	7.95986	6.98283	6.99689	7.01585	6.90118	7.61045	7.80316
FREM1	5.66138	4.83195	5.06421	5.27433	5.4721	5.44676	5.86307	4.78113	5.1951	4.18519	4.90437	4.5543	4.44617	5.83228	5.20841	4.28548	4.64628	4.45016	4.56414	5.24185	5.62503	5.14717	5.40318	5.24388	5.09304	4.1923	4.42414	4.54367	4.44713	5.60338	4.51968	4.40832	4.22718	4.44373	5.73399	5.46684
FREM2	6.70343	6.24632	6.10834	6.16679	6.60508	6.68683	5.3014	6.40343	6.20554	5.48108	5.36488	4.69516	4.22718	5.56783	6.90367	4.13903	5.28706	5.46652	5.03657	6.66182	5.23431	6.61939	6.05225	6.09962	6.39501	2.44344	2.44863	2.35777	2.54246	5.97673	2.56073	2.68256	2.52745	2.37271	5.46916	6.09121
BAMBI	8.0684	7.8079	7.82595	8.00997	8.26282	8.16405	8.34107	8.02439	8.1745	7.12722	7.69476	7.74251	7.79721	7.79715	7.76791	7.76527	7.6992	7.74331	7.9828	7.13942	8.3059	8.04555	8.18663	8.00019	7.71948	8.06392	8.8912	8.90138	6.86316	8.21639	8.35822	8.53816	8.64157	8.64109	7.68193	7.94192
IGHV1-69	2.8205	3.19866	2.80679	2.80497	2.91224	2.79921	2.77148	2.91408	2.79187	3.08883	3.12478	3.46517	3.58144	2.70366	2.82939	4.03171	4.40019	4.75394	4.24531	2.82886	2.65498	2.76143	2.7202	2.75522	2.76155	3.17422	3.10344	3.09598	3.09103	3.03332	3.78309	5.19612	4.59719	4.17199	2.65315	2.85211
BANK1	6.83246	6.87908	6.62736	5.93856	6.29492	7.65515	5.77009	7.42064	6.6406	5.73366	8.1801	5.55363	5.98825	6.44219	7.02067	5.5885	7.06349	4.87703	5.50403	6.81572	6.86604	6.88392	6.4468	7.04281	6.81892	5.10794	5.80185	5.7776	5.29913	5.91966	5.07463	5.79447	5.34751	4.56055	6.49634	6.6463
BANF1	8.47988	9.25248	8.40318	8.16682	7.78684	8.29132	9.00228	8.59717	8.15013	9.79837	9.19142	9.0022	9.41482	8.54971	8.85652	9.58823	9.36509	9.78173	9.54804	8.66726	8.3602	8.47277	8.40759	8.87181	8.69688	9.45835	9.50566	9.33437	8.85599	8.0526	10.163	9.54473	9.81287	9.85637	8.21585	8.65545
FA2H	4.51798	5.16177	4.83513	4.7913	4.79161	4.89248	4.6945	4.92617	4.50723	6.08736	5.02886	5.60693	5.57435	4.48561	5.17785	4.44926	4.6568	4.57011	4.49669	4.74296	4.4883	4.70622	4.38041	4.91752	4.80955	4.79652	4.79918	4.91861	5.1272	4.77595	4.11442	4.16485	4.02465	4.22085	4.87207	4.74415
FAAH	6.80124	7.12851	6.92396	6.57088	6.12132	6.83404	6.69347	6.65189	6.68108	6.13548	6.26238	5.95369	6.29829	6.60511	6.78032	6.16773	6.20059	6.15669	6.13748	6.695	6.24436	6.88509	6.85656	7.0152	7.03718	5.99015	6.07258	6.30499	5.86789	6.67829	7.21208	6.8105	7.27949	6.8595	6.89038	6.57921
AJ011981 /// DPY19L1	4.81652	4.32719	4.67257	4.34093	5.4731	4.97227	5.03598	4.27448	4.26211	4.12136	4.05069	3.94754	3.69058	5.04545	4.12144	4.12429	4.35898	4.01175	4.02901	4.32366	4.33122	4.43041	4.50282	4.30721	4.60067	3.77344	3.81823	3.95262	3.9739	4.31836	3.95616	3.76093	3.68063	3.97772	5.02281	4.6591
FADD	6.64865	7.51415	7.2447	7.12591	6.731	6.78962	6.39005	7.31467	7.21457	7.77792	7.40398	7.87614	7.44356	6.93865	6.84859	7.76088	7.49282	7.85965	7.88037	7.01765	7.10225	7.01648	7.17024	7.10937	6.78709	10.5497	10.217	10.0923	10.0451	6.80992	7.61398	7.38634	7.52967	7.4745	6.27116	6.74621
TNRC6C-AS1	5.51846	5.33125	6.29591	6.08155	5.4815	6.08537	5.63117	5.98817	6.00452	5.65189	5.71929	5.51836	5.42114	5.64091	5.8273	6.26477	5.87205	6.20207	6.20875	5.56691	6.08514	6.1952	6.26769	6.52047	5.88828	6.04254	6.12412	5.98677	4.95193	5.98103	7.23091	7.41567	7.67716	7.14065	5.25395	5.96622
FAF1	7.75684	8.08414	7.84779	7.69551	7.84233	7.99901	7.97772	7.78593	7.79402	8.26862	8.00317	8.23944	8.26496	7.88364	7.96212	8.3901	8.1572	8.46252	8.45934	7.86583	7.86304	7.84357	7.83577	8.01766	7.97281	8.34469	8.50487	8.70964	8.29117	7.9026	8.70488	8.48199	8.58125	8.6478	7.8716	7.77698
FAF2	7.29347	7.30575	7.494	7.36272	7.28115	7.40311	7.2665	7.12409	7.31283	7.3851	7.46731	7.39598	7.35653	7.28473	7.2815	7.58053	7.50328	7.75478	7.8583	7.22735	7.47013	7.34029	7.17934	7.10601	7.25588	7.59056	7.64387	7.37395	7.34613	7.26817	7.12593	7.21853	7.17241	7.26004	7.30759	7.09463
FAIM	6.67365	7.11567	7.14194	6.86487	6.61656	6.89204	6.60057	7.23494	6.96568	8.22727	7.40182	7.82787	7.58883	7.08904	7.32523	7.57078	7.38527	7.66092	7.489	7.24324	6.80515	7.0556	6.65888	7.05197	7.01859	7.78421	7.78689	7.6427	7.27958	6.99525	8.4337	8.33171	8.63936	8.27771	6.96218	6.6692
FAN1	6.17145	6.27272	6.24258	6.21423	5.64079	5.81448	5.67017	6.12624	6.19791	5.72448	5.7114	5.85417	5.90207	5.85274	6.21095	5.97878	6.03318	6.24828	6.18864	6.39438	6.1199	6.21334	6.32721	5.97861	6.28701	6.43178	6.65643	6.85636	5.6739	6.12778	6.18392	6.07839	6.20836	6.09835	6.01801	6.04488
FAR1	7.45853	7.2243	7.78547	7.70064	7.15738	7.17977	7.19087	7.01252	7.50873	6.81745	6.25758	6.84364	6.47437	7.40698	7.23435	5.5602	6.0261	5.47752	5.87631	7.63888	6.8587	7.37988	7.44241	7.37833	7.44657	5.53888	5.39318	5.21637	5.21406	7.43574	7.47559	7.20692	7.58154	7.07971	7.20179	7.16108
FAR2	5.96767	7.17916	6.41454	6.8172	6.68812	6.94907	6.14967	6.65977	7.15089	5.00372	5.54868	5.08093	5.38315	7.36572	6.96556	4.32686	5.10143	4.23224	4.7353	6.66887	6.08238	6.39792	6.80143	7.22345	5.57307	5.21153	5.27003	5.37373	5.26898	6.12603	3.93032	4.37896	3.90624	3.71004	6.54248	7.11987
FASN	8.55153	9.09266	8.03751	8.79377	8.96142	9.53827	8.55884	9.30261	8.26596	7.65525	8.39741	7.23328	7.71256	8.2797	10.1097	8.09179	8.3254	7.86959	8.28245	9.16588	8.76713	8.816	8.32216	10.1772	9.75073	8.53526	8.12989	8.21376	8.19465	8.36757	10.038	9.69652	10.0536	9.65044	8.6274	9.00166
FAT1	8.19128	7.92692	8.29557	8.34402	8.5932	7.55576	8.27142	7.56732	7.74853	7.1762	7.37167	7.29063	7.59816	8.01016	7.71755	7.56373	7.59013	7.20312	7.58536	7.87029	8.06288	7.94657	7.9667	7.61021	7.94827	9.40208	8.83385	7.78929	9.56967	8.04192	8.15462	8.51326	8.30637	9.11298	8.07615	7.74897
FAT2	3.55085	4.14578	3.85356	3.74583	3.8782	3.7693	3.80201	4.19513	3.44582	8.16362	5.88443	7.51063	6.8453	3.77686	3.93793	9.25928	8.26142	9.44452	9.23193	3.7167	4.19135	3.59327	3.59383	4.00707	4.1366	7.84723	7.14547	6.9379	6.67025	3.88737	8.03917	7.65661	7.81641	8.51806	4.07234	4.02706
FAT3	6.58077	5.62895	6.87849	6.58552	7.26255	6.05179	7.2792	5.76862	6.81633	3.32936	3.61414	3.38063	3.77305	6.83775	6.40635	3.47887	3.18084	3.23683	3.5307	6.31644	6.40772	6.36432	6.98825	6.14185	7.04684	3.39882	3.19055	3.21623	3.29905	8.21575	3.40025	3.35598	3.30556	3.37423	7.50583	6.82061
FAT4	7.70034	6.70659	7.42943	7.5946	6.93729	7.04168	7.97726	6.87457	7.59335	5.27648	6.67979	5.75814	6.24002	7.13606	6.95545	4.84429	5.59444	4.9174	5.42864	7.42269	7.4651	7.364	8.00996	6.6509	7.03332	4.20914	4.38065	4.22357	4.4719	7.51825	4.97153	5.64632	5.30038	4.94423	7.50796	7.12971
MIR646HG	4.24471	3.84472	3.8274	3.69413	4.94189	3.97677	3.84671	4.99119	3.78739	4.32476	4.01266	4.06674	4.25844	4.48654	4.38064	4.16285	4.01431	4.187	4.12139	4.32614	4.11086	3.48728	4.19373	4.08174	3.96688	4.05252	3.8187	3.86291	3.6091	3.45534	4.22366	3.79967	4.09	4.11082	4.36943	4.04533
FAXC	4.6148	4.86756	4.78316	5.02643	3.9832	4.61616	4.14864	4.58719	4.8751	7.37773	5.5677	7.34048	6.90915	4.34019	4.70648	3.81851	4.86871	5.59178	4.89808	5.01647	3.54582	4.03047	4.9458	4.34811	4.16561	5.05014	5.1257	5.34961	3.82885	3.88465	7.51823	7.52148	7.50784	8.04651	3.72336	4.37602
FBF1	6.0863	6.11655	6.03021	5.97292	5.89209	5.96135	6.05051	6.08862	5.90132	6.72095	6.3234	6.73549	7.07542	5.93042	6.12907	5.95069	6.04013	6.01121	6.11202	6.12197	5.86992	6.00551	6.16175	6.18591	6.15221	6.68545	6.65219	6.53246	6.79816	6.16889	6.85746	6.61254	6.88901	6.68422	6.00841	6.18612
FBN2	3.98351	3.68053	3.36473	2.97113	3.54489	3.20334	3.6866	3.77054	3.21935	3.05659	3.62828	4.72255	6.29743	3.68819	3.44463	5.13514	5.33458	8.07522	5.73201	3.19069	3.60152	3.30956	4.10868	3.28079	3.27291	4.15635	3.58353	3.57816	3.50424	2.84807	3.59883	3.41609	3.72909	4.43617	3.65432	3.34962
FBN3	5.54746	4.81176	4.67454	5.85586	4.8718	5.53026	4.81732	5.35109	5.71324	4.73637	5.01417	4.72053	5.04215	5.26163	5.37908	4.86911	4.86597	4.97881	4.88137	5.40684	5.08366	4.84655	5.57054	5.08658	5.0763	4.9696	5.03026	5.14636	5.43803	5.18297	4.89404	4.63179	4.78913	4.62253	5.04435	5.33069
FBN1	6.82092	5.88972	7.08612	7.03305	6.65446	6.0889	7.96962	5.85852	6.72436	6.56158	6.9672	7.6691	7.41372	7.36858	6.15522	7.40091	7.38105	7.08635	7.1973	6.97656	7.68986	7.17264	6.66063	6.44924	6.47548	5.47512	6.18237	6.20229	6.70052	6.9522	5.95051	6.33775	6.08959	6.44169	6.83956	6.95035
RASGEF1A	4.44092	5.48357	4.66193	4.6224	4.49751	4.44535	4.19137	4.89353	4.66656	5.30026	5.04765	5.38257	5.26677	4.58359	5.03972	5.61609	5.07731	5.70254	5.57798	4.86847	4.44157	4.78541	4.64177	5.04534	4.82088	5.33866	5.25847	4.82675	5.41808	4.96617	6.81252	6.48794	6.39985	7.29163	5.03229	4.85839
FBP1	10.077	11.2208	10.5887	10.5897	10.2444	11.3834	10.3718	11.6778	10.9909	8.66053	9.0944	7.70978	7.85137	10.9738	11.298	7.82124	8.21317	7.45569	7.57648	10.5247	8.56743	10.4861	10.4192	11.8302	10.7446	7.72601	7.85677	7.75544	8.53389	10.0525	6.75963	7.72276	7.21886	6.35325	9.90208	11.2682
FBRS	6.24716	6.2587	6.10348	6.14677	6.24711	6.26267	6.55442	6.37921	6.06979	6.21013	6.48365	6.20737	6.55666	5.96509	6.278	6.66553	6.58503	6.83916	6.55037	6.22671	6.06336	6.24036	6.16909	6.53195	6.46628	6.52331	6.58394	6.72367	6.7136	6.00924	6.56324	6.5626	6.53458	6.39159	6.26256	6.23317
BARD1	6.32171	6.37987	5.91666	6.16561	5.60824	6.26425	6.71841	5.6204	6.54141	7.04998	6.65099	7.24389	6.795	6.3699	6.35857	6.81753	6.73332	7.00981	6.93574	6.13871	5.96074	5.81192	6.22735	6.09571	6.16829	7.26443	7.05677	6.87674	6.84563	6.51088	7.4131	7.0647	7.47506	6.77203	6.60208	6.16746
CITED2	9.7798	9.22026	8.31283	9.36181	8.76834	9.58863	9.62026	9.60037	9.44259	7.43852	9.11726	7.16299	7.41063	9.1584	10.2219	7.22318	8.13163	7.23916	7.55749	10.1259	8.95039	9.96516	9.61322	10.1153	10.017	6.84046	7.46371	7.32499	6.60836	9.75597	7.92613	8.20864	8.05416	8.45938	9.00399	9.68817
CITED4	6.08408	6.78741	6.07413	6.29286	7.65433	5.92839	6.97518	6.13877	6.13184	7.19856	6.78114	6.88962	7.0504	6.62011	6.38707	7.10611	6.84247	7.19757	7.09854	6.64826	6.24534	6.37276	6.00433	6.20356	6.33491	6.8826	6.73498	6.38982	7.29937	6.20279	6.91638	6.68037	6.69006	7.15911	5.72788	6.22755
FCN1	8.41988	7.46051	8.32259	8.65123	9.28109	8.10686	8.16437	8.7174	8.04057	7.10739	7.95178	6.30228	6.20288	8.32103	7.98168	8.02587	9.11598	6.96726	7.47191	8.27447	8.8156	8.01392	7.59126	8.08195	7.65407	5.42224	5.78933	5.55821	5.85893	7.20882	6.53233	7.26671	6.75828	5.66715	8.87056	8.39141
FCN3	10.8281	10.4223	11.5655	11.3836	11.3867	11.4412	8.84605	10.8342	11.1334	7.03912	8.42295	5.48496	5.46662	10.4549	11.8318	7.7512	8.65096	5.89932	8.07766	11.2619	8.39848	10.8996	12.141	11.5054	10.8137	5.24681	5.53255	5.27251	6.02206	9.81848	8.06336	8.85632	8.05573	6.34819	11.2902	11.0878
RABAC1	9.78606	10.4394	10.0175	9.91497	9.53116	9.93524	9.81975	9.8437	9.74917	9.48402	9.85985	9.76459	9.87354	9.70126	9.82442	9.75309	9.82046	9.62474	9.58854	9.43353	9.78923	9.79724	9.8144	9.67284	9.6794	9.81791	9.80019	9.56829	10.2166	9.46322	9.25203	9.31292	9.13899	9.54782	9.54068	9.87049
FRMD1	5.15005	5.09601	4.79443	5.11933	5.28719	5.15088	5.24062	5.35513	5.03631	5.14785	5.21823	5.1095	5.27086	5.41407	5.07987	5.44134	5.36925	5.44756	5.47783	4.8543	4.96919	4.93172	4.96162	5.12594	5.10477	5.41014	5.35205	5.59497	5.26081	5.0708	5.31176	5.37152	5.32691	5.53074	5.28942	5.25093
FRMD3	7.19469	6.70659	7.55498	7.34181	6.81791	6.7366	6.6035	6.51485	7.61361	4.38428	5.2644	4.36576	4.42751	7.38231	6.27339	3.95535	4.42766	3.99969	4.16526	7.33445	6.0632	7.37072	7.73356	6.41338	7.08199	4.70223	4.66745	4.36512	4.4087	6.89323	4.61867	4.7122	4.31203	4.58951	6.33311	6.63006
FRMD5	4.09092	4.39205	4.10178	4.51148	4.47287	4.69604	4.40146	4.36548	4.22802	4.71191	4.52327	4.83211	4.75721	4.68931	4.44712	5.16247	4.54572	5.20321	4.80527	4.28918	4.26857	4.51759	4.46864	4.29633	4.50788	5.02945	4.72817	4.81202	5.22693	3.97185	5.03184	4.80287	4.74083	4.72299	4.44392	4.7902
FRMD6	7.79906	6.99526	7.47708	7.18196	7.80029	6.78481	8.0701	7.44211	7.22761	9.05221	8.48229	9.62286	9.50105	7.73128	6.57137	9.21534	8.3013	9.18885	8.9899	7.01702	7.9881	7.55012	6.96277	6.5836	6.89906	8.85103	8.71482	8.78355	8.41833	7.56005	8.59458	8.88149	8.85407	9.21694	7.34719	7.25783
FRMD8	7.83694	7.77475	7.55995	7.87809	8.50542	7.86298	8.04758	7.68021	7.77483	8.76833	7.92358	8.53632	8.40581	7.7363	7.76198	8.2224	7.98878	8.23451	8.30394	7.58756	8.3572	7.90265	7.73774	7.55248	7.53823	8.44568	8.69394	8.91443	7.67232	7.58944	8.59045	8.59427	8.62347	8.62038	7.93668	7.49165
BARX1	3.95448	4.08537	3.77545	3.67728	3.91294	4.17628	4.04142	4.08378	3.55853	4.23278	4.36929	4.61163	4.69856	3.65309	3.78472	4.57511	4.27062	4.53925	4.16947	3.93735	3.96793	4.0579	3.67224	4.13644	3.73882	5.9082	5.73229	5.4736	6.08789	3.90311	4.63074	4.47206	4.60977	4.92012	4.02822	3.82755
BARX2	4.50828	4.92927	4.64775	4.46061	4.67373	4.61306	4.77384	5.10843	4.54736	4.94184	4.93732	4.78641	4.87727	4.43564	4.65445	5.08878	5.0981	5.05272	4.94005	4.67518	4.64835	4.60744	4.89884	4.66015	4.55601	5.15401	5.02704	5.11594	5.37941	4.40671	5.41468	5.20669	5.31094	5.455	4.58279	4.63853
FDPS	9.33071	9.82397	9.34162	9.48932	8.9321	9.41483	9.08774	9.61282	9.43769	9.22461	8.89629	9.00926	9.01066	9.21388	9.60653	9.39312	9.19187	9.30217	9.41366	9.6042	8.9951	9.51285	9.21612	9.70658	9.43545	10.2286	9.61182	9.45978	10.4181	9.4003	10.3459	9.9997	10.2575	9.84807	8.99142	9.29535
MLST8	6.7753	7.26288	6.80035	6.63448	6.55206	6.93978	6.97032	7.04717	6.99498	7.54606	7.15307	7.13937	7.44125	6.85201	6.99752	7.30056	6.98913	7.30044	7.22865	6.67766	6.85857	6.81008	6.77213	7.05014	6.88287	7.18422	7.31408	7.56466	6.8593	6.51096	7.0087	6.72152	6.77806	6.88598	6.44184	6.91016
FDXR	5.65375	6.58041	5.90293	5.72982	5.72206	5.99728	5.52551	5.92629	5.81333	8.10521	6.34687	7.50375	7.58741	5.5295	6.05835	6.00507	5.92586	6.09653	6.09671	5.28988	5.79097	5.67249	5.48424	5.75742	5.85362	6.69248	6.7585	6.85067	6.18902	6.1116	8.22211	7.81209	8.24135	7.636	5.9816	6.07114
FDX1	6.4517	6.45105	6.31626	6.49165	6.39021	6.56406	6.44335	6.67707	6.27171	6.74531	6.58734	6.75703	6.49178	6.51569	6.76313	6.55719	6.3688	6.53973	6.37462	6.65475	6.60328	6.489	6.29935	7.08944	6.29509	6.03016	6.29667	6.24929	5.93715	6.40683	6.70135	6.42177	6.58729	6.10809	6.14585	6.29317
BATF2	7.07989	6.7749	6.76434	7.07654	7.12826	6.19873	7.78986	6.75873	7.06619	6.80892	5.99393	6.77319	6.66959	7.20823	6.49014	5.86751	5.38472	5.47619	5.68219	6.39302	6.56924	7.05231	7.0308	6.74156	6.88996	6.18071	6.22018	6.03152	6.1104	7.0617	5.50451	5.60925	5.20083	5.13563	7.65582	6.29691
BATF3	6.15417	6.83776	6.29005	6.1678	7.80617	7.13897	6.89965	6.70359	6.04918	6.21072	6.21204	6.25079	6.21412	7.27648	6.2721	6.35339	6.3534	6.00142	6.14191	6.50901	6.62687	6.48825	6.1271	6.48564	6.14907	5.90851	6.00504	6.07112	5.94212	6.19749	5.38464	5.60418	5.53311	5.53393	7.1454	6.27417
FECH	5.88014	5.92631	5.53947	5.60603	4.70033	5.39434	5.71547	5.974	5.95973	5.26102	5.54478	5.03981	5.14163	5.67257	5.66894	4.67155	4.88699	4.58691	4.55324	5.61338	5.81871	5.4871	5.81519	5.47357	5.64585	4.82115	5.35519	5.63582	4.77195	5.90098	4.9817	4.83893	4.90647	4.52713	5.43821	5.61965
FEN1	5.50369	5.8662	5.65274	5.82845	5.42968	5.41315	5.67474	6.02583	5.99327	8.87262	7.18114	8.63374	7.92823	5.89575	5.81972	7.26845	6.8242	7.00503	7.43797	5.4758	6.15776	5.85734	5.6652	5.94527	5.64739	7.97236	7.84178	8.0042	7.29351	5.64799	7.81028	7.45111	7.94706	7.12214	5.58801	5.54663
BASP1	8.83441	8.56911	7.89086	7.67879	9.50013	9.09257	8.66902	8.6303	7.65499	9.70858	10.1989	10.3596	10.445	8.74983	8.15106	10.7336	10.725	10.8687	10.7771	7.9757	9.82167	8.03516	7.97545	8.03174	8.33308	10.0533	9.64866	9.09271	9.58994	8.35999	8.39435	9.11353	8.62168	8.87173	9.1674	8.53198
FEZ1	8.80877	8.93982	9.19277	9.19244	9.02736	8.45953	9.28127	8.42547	9.16505	8.38836	8.27018	8.65277	8.36862	9.02239	8.75454	9.23221	8.40932	9.02869	9.05733	9.10857	9.39316	8.94605	9.43592	8.89409	8.79957	7.59198	7.88327	7.94459	7.46003	9.27908	7.02501	7.98466	7.3293	7.99984	8.9805	8.80602
FEZ2	8.99534	9.05868	9.24641	9.28201	9.11128	9.00555	9.3683	9.07045	9.39362	8.77228	9.02172	8.8605	8.79157	9.24528	9.13698	8.79212	8.88145	8.8671	8.76845	9.30522	9.41837	9.13398	9.26775	9.20417	9.04372	8.9565	8.98913	8.96115	8.57929	9.08852	8.6146	8.554	8.48307	8.6694	9.03143	9.37014
MYBBP1A	5.9328	5.95141	5.98911	5.90533	5.78461	5.96865	6.11314	5.99008	6.07092	6.12427	5.9893	5.9446	5.95905	5.80134	5.90969	5.9571	6.07498	5.93431	5.99663	5.79711	6.13465	5.98771	5.79734	5.97156	5.92392	6.23085	6.15668	6.09656	6.03937	5.79583	7.097	6.76115	6.99992	6.8152	5.90043	5.74792
ANKRD23 /// ANKRD39	4.86449	5.13978	5.01832	4.93378	5.20382	5.11014	5.10644	5.08795	5.19901	5.30888	5.6544	5.48844	5.55868	4.92859	5.17082	5.55602	5.47221	5.57605	5.63461	5.29227	5.00868	5.04802	5.20616	5.32127	5.08801	5.57202	5.4167	5.58555	5.86441	5.15803	5.49216	5.54283	5.38245	5.47725	5.12444	5.26287
HIBADH	6.8238	7.24274	7.11977	6.93943	6.58818	6.94094	7.15105	6.89713	7.29027	7.30328	7.07781	7.46423	6.87918	6.72429	6.86974	6.4494	6.79083	6.56422	6.6093	6.84161	7.20645	6.81201	7.37923	7.02084	6.85171	7.27911	7.26422	7.28422	6.53179	6.87964	7.09308	7.27204	7.36808	7.04625	7.01259	6.9318
FGD1	5.893	5.56104	5.45764	5.23439	5.36764	5.51371	6.10471	5.40384	5.44601	6.70556	6.09851	6.51517	6.54286	5.33097	5.30821	6.05129	6.06027	6.14728	6.14483	5.15306	6.10619	5.60035	5.68575	5.33249	5.35477	6.61255	6.32262	5.91136	6.42804	5.55248	6.7406	6.40478	6.70223	6.4985	5.7665	5.62219
FGD2	5.32476	5.84034	6.09856	5.81699	5.69019	6.0798	5.88704	5.93036	5.88265	5.66517	6.08545	5.81415	5.83628	6.27162	5.99454	6.01513	6.1114	5.80382	6.14949	6.06445	6.09483	5.87444	5.91148	6.5684	5.90777	5.92278	5.77678	6.07692	6.12454	5.90724	5.66087	5.62576	5.64006	5.66882	5.84033	6.31036
FGD3	8.56336	8.15582	8.29925	8.27708	8.17055	8.17069	7.67609	8.15013	8.0523	7.27925	8.18582	7.5779	7.88743	8.39153	8.12446	7.63802	7.9877	6.92194	7.4934	7.74291	7.89478	8.15506	8.53029	7.98006	8.08836	7.39451	7.69742	7.57226	7.59813	8.22009	6.45423	7.00031	6.64155	6.1385	7.86325	8.28652
FGD4	7.18633	6.68189	6.91097	7.15676	6.23073	6.85365	6.63922	6.69736	7.07034	5.4135	6.30914	5.2847	5.24666	6.62747	6.98191	5.70705	6.14032	5.66531	5.8408	7.99503	6.44486	7.22493	7.0511	6.91584	7.00457	4.37684	4.50675	4.20431	4.5537	6.67878	4.906	5.31183	4.93362	5.04452	6.87792	6.72518
FGD5	7.62424	7.17902	7.67153	7.97872	7.34898	7.40869	8.31356	7.62409	7.70241	5.76706	6.03654	5.61308	5.75105	7.31802	7.70292	5.89772	6.05031	5.79143	5.96871	7.43202	6.97323	7.71085	8.03265	8.01168	7.87086	5.15975	5.22116	5.53031	5.61004	7.41642	5.11256	5.3798	5.04552	4.97977	7.54012	7.67006
FGD6	5.48623	4.56064	5.64301	5.8612	4.88426	5.09008	6.08625	4.80832	5.42582	5.71155	5.81854	6.21743	5.95134	5.66903	5.3884	5.57855	5.02559	5.6626	5.42802	4.7788	5.33045	5.41856	5.60928	5.53375	5.51686	6.5342	6.71848	6.81271	5.39604	5.42818	5.44073	5.85371	5.82678	6.49037	4.98561	4.77225
FGF1	5.92375	5.8278	6.25018	6.39379	6.19952	5.01108	5.65901	5.38429	5.76733	5.63406	4.78379	5.80401	5.73847	6.092	5.16264	4.92888	4.70418	4.68981	4.92311	5.42332	5.21811	5.27433	5.98971	5.77918	5.60072	4.27737	4.41207	4.56281	4.99047	5.43781	4.67341	4.57427	4.3711	4.38881	5.53986	5.40336
FGF2	4.91242	4.623	4.81925	5.39466	6.87844	5.47801	5.41206	4.98216	5.60161	5.34709	4.7729	5.22496	4.89389	5.77142	5.09629	3.62083	4.18242	3.67532	3.82647	5.4186	4.88773	5.61773	5.54594	5.11897	5.33243	3.9847	4.1894	4.39933	4.00808	5.23291	4.19645	4.3956	4.35638	4.69216	5.44665	5.19562
FGF6	5.36173	5.50061	5.17136	5.06672	5.36254	5.44426	5.36304	5.32576	5.08562	5.70195	5.8628	5.87094	5.7411	5.26842	5.31373	5.8214	5.75452	5.7713	5.6789	5.06215	5.4988	4.83799	5.26279	5.5538	5.57184	5.67604	5.87473	5.95675	6.2503	5.3009	5.53944	5.47923	5.53335	5.41824	5.31925	5.47389
FGF7	5.63217	4.93629	5.22764	5.59982	5.70615	5.59896	5.52063	4.71371	5.84205	4.65171	4.92502	4.00987	4.29829	5.70758	4.96855	3.46653	5.00648	3.26418	4.33573	5.62486	5.94347	5.88069	5.97408	4.89645	4.88323	3.27085	3.44156	3.25773	3.60116	6.29993	3.38332	3.61358	3.17275	3.14521	6.13205	4.9633
FGF9	6.69944	5.67444	6.30937	6.0324	4.95575	5.92889	5.66138	5.81712	6.35486	3.80483	4.1639	3.55198	3.74574	4.5056	5.7736	4.02736	4.22063	4.30318	4.00038	5.84295	5.64333	6.32538	6.04352	5.98604	5.77904	3.95058	3.82972	3.74157	4.36489	5.31105	3.91926	3.90252	3.73982	3.95538	5.0401	6.39557
FGGY	5.67436	6.35841	5.86906	6.13927	5.98199	6.16083	5.89294	5.76427	6.26858	5.61692	5.88353	5.58999	5.47799	5.85336	6.19794	6.40831	6.29588	6.57287	6.31589	5.86635	6.19425	6.05163	5.79837	5.88292	6.145	6.36528	6.37356	6.67649	6.24131	6.18484	7.01681	6.88021	7.05774	7.04604	6.08799	6.0538
AC009120.6	6.09908	5.58519	5.92934	6.07559	5.7105	5.81898	5.70558	5.70557	5.77291	5.79649	5.27975	5.37091	5.60038	5.86545	5.61653	5.67836	5.66837	5.4539	5.48561	5.76309	5.64185	5.62201	6.01703	6.06441	6.00715	5.76221	5.54469	5.2715	5.64923	6.14395	5.31937	4.9576	4.98784	5.31595	5.74912	5.6985
FGL1	4.93283	4.64413	4.51142	4.54851	4.71613	5.03409	4.47399	4.69572	4.78048	5.02818	4.91673	5.04069	5.06041	4.63424	4.70229	5.21016	5.56017	5.051	4.8757	4.62958	4.83294	4.80328	4.53793	4.36396	4.7436	5.0665	4.98876	5.1766	5.33921	4.58702	5.13031	4.92174	5.04786	5.07415	4.9317	4.57737
FGL2	7.89104	7.15065	7.93876	8.09764	8.15764	7.28681	8.13722	8.59591	7.7068	8.18345	8.70702	8.20915	8.09237	8.89409	7.58808	7.88121	8.62198	7.07895	7.53221	7.86182	8.78135	8.38744	7.84724	7.49535	7.75615	8.02298	8.47896	8.44713	7.99883	8.07745	6.00772	7.25263	6.63219	5.35947	8.25236	8.28326
ZWILCH	5.55426	5.94189	6.06275	6.13423	5.77843	5.46697	6.04587	5.60158	6.07118	6.99896	6.45679	7.01676	6.66562	6.5281	5.59996	6.63917	6.37661	6.29311	6.7338	5.9492	6.18151	5.80133	6.05306	5.74337	5.61319	8.06404	8.06967	8.10212	7.14557	5.83547	8.40502	8.09884	8.51092	7.97639	5.65524	5.56276
RABEPK	6.74488	7.28284	6.86582	6.93606	6.91473	6.89367	6.76515	7.15465	7.07001	7.10916	6.89318	7.25491	6.97669	6.79396	6.92461	7.05733	7.00565	6.86189	7.06216	6.73189	7.35828	6.9367	6.87151	6.83663	6.81293	7.41566	7.56214	7.71696	7.22738	6.89154	7.69604	7.42873	7.63378	7.46603	7.15126	6.83832
SUPV3L1	7.22022	7.30306	7.21271	7.121	7.32342	7.36077	7.04127	7.18621	7.32228	7.59703	6.85778	7.37539	7.08148	7.08889	7.03537	6.66949	6.74537	6.69281	6.88536	7.21564	7.13894	7.15716	7.10322	7.0462	7.23099	7.78512	7.81402	7.89141	7.50637	7.42189	7.59262	7.36714	7.62053	7.43949	7.26152	7.10768
RABEP1	6.28651	5.99438	6.21356	6.53272	6.42198	6.04409	6.61051	6.26989	6.4477	6.07574	6.28958	6.07704	5.93207	6.65105	6.36542	5.77819	5.8618	5.6328	5.61666	6.54067	6.62755	6.46213	6.44381	6.55912	6.50979	5.78765	5.83242	5.95403	5.52171	6.10489	6.67197	6.76017	6.88176	6.83212	6.39705	6.08844
RABEP2	6.86681	7.13335	6.77038	6.90785	6.94628	7.06824	7.11063	7.26889	6.718	7.15235	7.38404	7.30376	7.39588	7.01702	7.05958	7.53019	7.39701	7.50081	7.53545	7.03056	7.14761	6.98913	7.01891	7.21503	6.99497	7.39181	7.49973	7.53301	7.29496	6.95677	7.46047	7.18934	7.19411	7.2643	6.82131	7.14505
FHIT	5.70519	5.76644	5.2772	5.38699	5.64217	5.70685	5.40837	5.57331	5.68834	4.83738	5.38224	4.85407	4.99989	5.30617	5.68431	4.83224	5.19035	4.8505	4.73567	5.13175	5.99626	5.7583	5.33724	5.79086	5.58517	5.00769	4.98374	5.11976	5.03307	5.62276	5.52108	5.07555	5.28093	5.31163	5.73554	5.70363
FHL1	8.62482	8.84142	9.71508	10.0727	9.19875	8.60532	9.99754	8.65466	9.57316	5.51245	6.76681	5.26413	5.10518	10.0854	8.79716	5.56652	5.95513	5.41321	5.65517	10.0873	8.18058	9.57317	10.0439	9.83209	9.52513	4.9203	5.00311	5.04217	4.85776	9.46401	5.05624	5.7572	4.89173	4.58604	9.06639	9.52288
FHL2	7.87454	7.61008	7.10479	6.8056	8.59715	8.20839	8.40171	7.81465	7.29741	10.0732	8.8503	9.46436	9.2225	8.45478	6.46707	10.3508	9.83138	10.388	10.3287	6.90885	8.9512	7.32206	6.25736	6.8064	7.16489	7.65471	7.7087	7.76329	9.27085	7.1439	6.84166	7.73204	6.95015	8.34358	8.39134	7.5694
FHL3	5.91638	6.19611	5.5947	5.48185	6.47066	6.23807	6.63049	6.32749	5.79661	6.83685	6.63876	6.7029	6.71806	6.05485	5.99449	6.77352	6.86249	6.68602	6.96834	5.66965	6.80616	6.18628	5.72749	6.15252	5.77779	6.05406	6.14879	6.16979	6.71664	5.61649	6.66272	6.44947	6.46466	6.74533	5.83357	6.05567
FHL5	6.60776	6.16454	6.60863	7.3818	6.33097	5.87463	6.81597	5.12338	6.54758	3.68713	5.45422	3.59461	3.38589	6.86513	6.44653	3.93094	4.12923	3.48508	3.94634	7.05828	6.00884	6.32972	7.18569	5.84965	6.35494	3.38178	3.1533	3.41128	3.23596	6.66184	3.58811	3.80218	3.68184	3.46577	6.37179	5.82971
CYP46A1	5.44649	4.92119	4.64859	4.63089	5.17202	4.83326	5.80846	4.93851	4.80546	4.92568	4.98462	4.64396	4.66866	4.83681	4.95564	4.88051	4.71781	5.07623	4.5922	4.3654	6.50161	4.91322	4.65455	4.52858	4.54892	4.24162	4.2535	4.43392	4.42999	5.60864	4.40514	4.39609	4.22019	4.51149	4.80714	4.9516
FICD	5.25289	6.08526	5.64927	5.75353	5.4334	5.90496	5.67458	5.57584	5.77504	5.92687	6.06996	6.43506	6.28315	5.55595	5.99483	5.42848	5.82267	5.69387	5.73975	5.84785	6.18449	5.8396	5.32881	5.78482	5.57356	6.02901	6.20578	6.00976	6.72341	5.51894	5.20409	5.44386	5.22882	5.58113	5.41696	5.79013
FIBP	8.53134	9.13569	8.77235	8.7517	8.69254	8.71431	8.96575	9.03258	8.78019	9.63573	9.26865	9.39725	9.34135	8.93482	8.79451	9.86931	9.63012	9.9673	9.86612	8.50694	9.08998	8.68341	8.66415	8.89508	8.73325	8.77916	8.98426	9.17147	8.44783	8.48228	9.30916	9.148	9.39044	9.20125	8.66477	8.82731
FIGN	6.17991	5.51048	5.94693	6.50562	4.38547	4.76882	6.16787	5.49114	6.14314	3.92242	4.473	4.4681	4.26147	5.43653	5.92701	4.18823	4.4753	4.13127	4.41458	6.81281	5.48968	6.54604	6.23947	5.52825	5.75593	4.04745	3.5231	3.80086	4.3056	6.41955	3.43565	3.53374	3.41502	3.60652	6.00902	5.9481
FIG4	7.85714	8.49603	8.32969	8.13512	7.88682	8.45068	7.87001	8.51167	8.50638	7.09851	7.58239	7.10504	7.25501	8.05447	8.34212	7.45635	7.66432	7.3509	7.57183	8.08094	8.09332	7.93657	7.98362	8.65792	8.14515	6.85766	7.11692	7.15094	6.77366	8.19183	8.00166	7.71149	7.71471	7.69055	8.26027	8.49351
FIS1	9.32985	9.93655	9.50372	9.32215	8.92597	9.13878	9.32643	9.17388	9.60291	9.08432	9.24953	9.21804	8.96779	9.22867	9.45256	9.03915	9.09117	9.01005	9.02981	9.19838	9.03407	9.54612	9.41728	9.32051	9.37619	8.86314	8.8017	8.55198	8.9113	9.26343	9.13789	9.12237	9.17538	9.18373	9.17157	9.32654
FIZ1	6.03732	6.39318	6.08376	6.11745	6.09861	6.29103	6.44502	6.33671	5.94486	6.02233	6.22354	6.16262	6.32384	6.342	6.27457	6.216	6.22571	6.39209	6.26372	6.11323	6.18091	6.18307	6.36373	6.57689	6.38331	6.52734	6.34624	6.41158	6.33364	6.12246	6.18494	6.14876	6.24743	6.12755	5.9954	6.25898
MLYCD	6.80813	6.71454	6.72059	6.51332	5.76744	6.71225	6.52162	6.71879	6.79612	6.02729	6.31742	6.29694	6.31637	6.63152	6.94069	6.10388	6.36093	6.20813	6.23036	6.48231	6.5852	6.5103	6.84981	6.60856	6.45206	6.41003	6.34106	6.37345	6.53538	6.39977	6.34165	6.12917	6.34502	6.03402	6.45416	6.44
BAZ2A	7.02607	6.85432	7.0295	6.92801	6.85988	6.87782	7.1177	6.37475	6.95649	6.9012	6.95981	7.10606	7.21576	6.93162	6.94883	7.31387	6.98131	7.32017	7.12643	7.0892	6.87355	7.05118	7.08366	6.98098	7.02546	7.28789	7.31435	7.21024	7.49591	6.83146	7.35419	7.35659	7.22567	7.31003	6.84149	6.77645
BAZ2B	8.77419	7.93345	8.45953	8.11894	8.09519	8.36785	8.36117	7.85897	8.38053	6.85202	7.63826	7.07707	7.41707	8.00193	8.31628	7.62465	8.00499	8.01554	7.76703	8.14528	8.11151	8.22327	8.50389	8.08076	8.40733	6.98906	7.23324	7.27861	6.55275	8.36743	6.87779	7.02481	6.92352	7.11341	8.3732	8.38843
BAZ1A	7.71773	7.20516	7.57687	7.71008	9.61152	8.28326	7.88206	7.75036	7.48231	8.79346	8.31275	8.4711	8.3822	8.41407	7.80064	8.1979	8.23886	8.30186	8.3335	7.81447	7.89623	7.63031	7.57752	7.7785	7.5795	8.2634	7.97365	7.65048	8.0577	7.53341	9.42879	9.54554	9.647	9.57678	8.31257	7.55189
BAZ1B	7.21425	7.09527	7.07996	7.1765	7.06235	7.13748	7.30239	7.15463	7.05026	7.53698	7.3884	7.55644	7.66345	6.97629	7.20505	7.37387	7.16094	7.41865	7.35449	7.14548	7.05416	7.17147	7.34637	7.24145	7.27132	6.94419	7.20765	7.2081	7.06157	6.95983	7.59753	7.44216	7.66753	7.55032	7.13103	7.05022
FJX1	6.68043	5.77234	6.19383	5.48293	7.47262	6.71123	6.80822	6.09165	5.75179	7.7172	6.63644	7.44656	7.08726	6.46454	5.55592	7.43127	6.95899	7.57641	7.64106	5.14935	7.22913	6.38726	5.79071	5.56854	5.49156	7.11553	7.23802	7.45824	6.8469	5.2348	7.62309	7.61809	7.68564	7.94251	6.37091	6.15945
GLYCTK	5.79612	5.93525	5.65913	5.7801	5.84359	6.00421	5.8503	6.01383	5.63036	5.7669	5.91411	5.61922	5.85252	5.76325	5.90916	5.80681	5.77538	5.54438	5.59255	5.53326	5.90757	5.64117	5.84397	5.86126	5.88476	5.38135	5.61585	5.7015	5.93422	5.69478	5.92821	5.75795	5.93984	5.84059	5.63005	6.06684
FKTN	6.24476	6.11422	6.46081	6.17026	5.60914	6.01283	5.89077	6.18398	6.4317	5.73708	5.78424	5.75444	6.06086	6.24202	6.16521	5.25156	5.50469	5.42982	5.76255	6.28792	6.13957	6.34517	6.2536	6.28284	6.29913	6.57915	6.14291	5.7547	6.13696	6.24391	5.28402	5.41218	5.54723	5.24895	6.16826	6.30141
MLXIP	8.71504	8.04919	8.89939	8.68341	8.85302	8.4714	8.76308	8.5571	8.76901	8.04797	8.21878	7.86563	7.91527	8.33041	8.42855	8.57048	8.66042	8.38026	8.55093	8.67495	8.78658	8.77902	8.6569	8.55237	8.73482	7.44606	7.53017	7.25603	7.31442	8.85731	7.41933	7.66406	7.53124	7.76752	8.69997	8.6869
FKRP	7.13999	7.148	6.96242	7.42781	7.59283	7.45451	7.34901	7.28878	7.12574	7.51926	6.93864	7.26257	7.33657	7.19467	7.18467	7.0299	6.89165	7.04856	7.15969	7.31744	7.10291	7.57369	7.37366	7.14057	7.15134	6.9968	6.76856	6.93238	7.02854	7.17523	7.19635	7.09491	7.0072	7.00815	7.29377	6.93929
KDM1A	7.88364	8.17854	7.9932	7.60316	7.6065	7.87066	7.8439	7.87818	7.91846	9.14307	8.42079	8.99998	8.81568	7.62036	7.75803	8.89186	8.61607	8.88302	8.81338	7.69814	8.01806	7.81971	7.74021	7.76597	7.93411	8.60789	8.5295	8.63031	8.69407	7.81055	9.66391	9.30462	9.58839	9.66955	7.72576	7.82479
KDM1B	5.99948	6.68738	6.48067	6.46854	5.78466	6.1273	6.1551	6.91145	6.45722	7.46465	6.36259	7.07273	6.89302	6.49502	6.56509	7.07768	6.70222	7.1109	6.94592	6.45479	6.49216	6.56765	6.46376	6.81944	6.42308	6.22469	6.25182	6.41034	5.3018	6.30618	7.39121	7.25572	7.33397	7.55284	6.40276	6.50609
KDM2A	7.42734	6.76607	7.18183	7.00638	7.782	7.52577	7.64304	7.18246	7.12677	7.34	7.30385	7.30053	7.44661	7.22171	7.34068	7.97833	7.46206	8.03974	7.86028	7.09194	7.17653	7.24786	7.15806	7.43537	7.52742	7.1377	7.23394	7.29354	7.07441	7.34547	7.64616	7.46818	7.5897	7.54873	7.23699	7.26286
KDM5A	5.57255	5.33662	5.93423	5.95342	5.24952	5.47608	5.7613	5.10696	6.14041	5.88999	5.87306	6.07961	5.86727	5.67396	5.75316	5.29061	5.51785	5.40807	5.63293	5.71888	5.58498	5.61073	6.08817	5.53004	5.58394	5.49345	5.57269	5.39521	5.1311	5.44696	5.65921	5.58475	5.85367	5.86368	5.32876	5.51652
KDM5B	7.91229	7.77601	7.63323	7.29847	7.88832	7.59356	7.64339	7.62788	7.54072	8.1109	7.77389	8.16197	8.30336	7.38073	7.52265	8.12893	7.92705	8.20155	8.22712	7.23916	7.91291	7.41012	7.58133	7.48119	7.47139	7.74233	7.47474	7.36296	7.76846	7.49592	9.15312	8.96459	8.91721	9.2044	7.55386	7.4335
KDM5C	6.56595	6.11834	6.43857	6.02305	6.24287	6.14063	6.42722	6.59431	5.96505	5.78704	5.99424	5.83964	6.08953	5.99326	6.27494	6.27588	6.0901	6.24835	6.21211	6.42494	6.01356	6.25553	6.70377	6.44932	6.44422	6.05725	6.00068	5.92241	5.94008	6.05627	6.29401	6.19129	6.23061	6.40121	6.07065	6.28624
KDM5D	3.87143	8.24454	3.70295	8.28057	8.30858	8.57328	8.43312	4.14804	8.19116	8.3992	8.30299	8.49443	8.59175	8.32134	8.29606	7.6034	8.07049	7.9152	8.05154	8.18201	8.64323	8.37368	3.54454	8.37123	8.44628	7.43708	7.67163	7.89489	7.40265	8.65018	8.02206	8.19843	8.2102	8.04586	8.66389	8.54997
FLCN	5.4135	5.57764	5.89655	5.18069	5.25675	5.49559	5.30901	5.10564	5.66588	5.48831	5.2735	5.63858	5.68157	5.4434	5.36814	5.64783	5.33199	5.63422	5.80895	5.66901	5.21132	5.14316	5.28803	5.22008	5.19959	5.46136	5.47042	5.47596	5.53452	5.64137	6.26641	6.20763	6.13482	6.55372	5.32411	5.45411
KDM6A	6.55001	5.81667	6.54834	5.99838	5.69635	5.89223	5.9398	6.31235	5.91389	5.80812	5.69153	5.75678	5.65305	5.74762	5.81421	5.61878	5.52488	5.85542	5.59662	5.78583	5.83135	5.9833	6.80008	5.75295	5.92603	5.43875	5.49365	5.42186	4.85296	5.86996	6.03849	5.97878	6.11136	5.9549	5.6746	5.51657
KDM6B	8.1927	6.33141	6.53145	6.50874	9.78233	8.28442	8.38738	6.04795	6.78976	6.59712	6.93388	6.33872	6.6417	7.8128	7.52296	6.7738	7.00276	6.97174	6.88888	6.37686	7.04972	6.70379	6.45981	6.43718	7.14643	6.5862	6.61661	6.47692	6.30889	6.42106	7.40328	6.90842	7.04326	7.36543	8.89902	6.90026
KDM7A	6.67359	5.71482	5.94395	6.26897	7.06136	6.56753	6.57062	5.81969	5.94169	6.40487	6.58902	6.6852	6.7236	6.32231	6.3111	7.2986	6.96351	7.37971	7.30218	5.72026	6.57387	5.99832	6.36027	5.71725	6.27793	6.29402	6.40433	6.52713	6.07093	6.11946	7.27499	7.37752	7.41874	7.47795	6.35936	6.10605
KDM3A	8.42344	8.38372	8.57368	8.7975	7.6187	8.18236	8.3547	8.22913	8.58711	8.64563	8.16225	8.48477	8.40158	8.30635	8.46134	8.44938	8.09038	8.80331	8.31546	8.63642	8.05983	8.48128	8.87318	8.30719	8.58191	9.4529	9.08031	8.88769	8.87441	8.90523	9.78725	9.99535	9.91265	10.3602	8.37838	8.35548
KDM3B	8.88003	8.64571	8.6207	8.65081	8.58204	8.50258	8.2249	8.77567	8.62451	8.08678	8.33628	8.14703	8.17783	7.92042	8.3747	8.10508	8.32452	8.11749	8.14589	8.24087	8.41101	8.5131	8.78772	8.27543	8.56294	8.2684	8.14001	7.93155	8.0639	8.53032	8.25765	8.28099	8.15448	8.14667	8.44688	8.44751
KDM4A	6.96678	6.89612	7.07264	6.93182	6.40864	6.77119	6.91986	6.7989	6.86455	6.86177	6.97355	6.93575	6.71408	6.91608	7.07701	6.86631	6.92174	6.90632	6.95939	7.06849	7.06996	7.01778	6.88225	7.0758	7.06013	6.96473	7.28147	7.47864	6.56222	7.01195	7.65752	7.48744	7.73832	7.64893	6.73535	6.91643
KDM4B	6.7151	6.46621	6.60308	6.65668	6.63462	6.70367	6.82672	6.22095	6.60304	6.79549	6.71383	6.61849	6.63988	6.36774	6.79517	6.79607	6.75642	6.77791	6.78024	6.55566	6.73317	6.41869	6.65383	6.52438	6.47738	7.34381	7.20609	6.90749	7.13744	6.57373	6.94421	7.13346	7.08816	7.3912	6.45418	6.51083
KDM4C	6.74815	6.75315	6.51745	6.45494	6.45759	6.80784	6.28112	6.43198	6.64398	7.6774	6.74115	7.44032	7.2407	6.33088	6.56508	6.29511	6.1998	6.28885	6.18133	6.33097	6.65171	6.50121	6.76187	6.46396	6.52899	6.52023	6.58753	6.65661	6.42803	6.42403	6.25509	6.59428	6.3353	6.7828	6.61281	6.54503
FLII	7.75441	7.85714	8.08113	8.08099	7.879	8.00044	7.89192	8.37916	7.99186	7.44074	7.83209	7.27831	7.44908	7.94686	7.99008	7.93149	7.84794	7.66972	7.65555	8.08956	7.81182	8.00524	8.10758	8.09701	7.96672	6.85475	6.8517	6.98379	6.96957	7.80659	7.76618	7.88914	7.91119	7.7742	7.71648	8.10861
FLI1	6.5462	5.93301	7.10612	7.212	6.74241	6.65398	8.08109	6.32706	7.24953	5.00309	6.17532	5.01742	4.94178	6.42015	6.47564	5.11009	5.61379	4.69756	5.12687	6.87863	7.1228	7.29703	7.45103	7.34939	7.02153	4.80258	4.92736	5.05318	4.92538	6.30469	4.41126	4.75684	4.64408	4.36215	6.15658	6.37252
FLNA	9.69135	9.56844	9.77445	9.70063	9.86712	9.66861	10.3596	10.126	9.6642	9.05055	9.24504	8.81038	9.60667	9.75457	9.86258	10.3987	9.80499	10.2804	10.0652	9.69013	9.23919	9.59505	9.71953	10.4876	9.95322	7.86199	8.21256	8.26479	8.6751	9.66197	9.02028	9.12365	8.94509	9.68362	9.64589	10.2096
FLNB	7.81993	7.49812	8.09166	7.51523	7.49928	7.3971	8.18359	7.43962	7.80942	7.91974	7.36582	7.67739	7.61005	7.61633	7.35663	8.26401	7.64997	8.36	8.10437	7.80482	7.49109	7.771	7.79555	7.4712	7.61383	7.69553	7.41738	7.60749	7.7224	7.62457	8.37803	8.42957	8.33834	8.83808	7.41527	7.5892
FLNC	6.39053	6.56639	6.25033	6.52712	7.17884	6.54288	6.26021	6.39612	6.0785	6.27848	6.39068	6.33694	6.31374	6.54586	6.0534	6.60029	6.28961	6.35828	6.31322	6.29705	6.31426	5.79372	5.86023	5.9837	6.02974	5.61411	5.96206	5.93226	6.31118	6.20579	5.74966	6.19642	5.89867	6.21119	6.63066	6.72203
FLT1	7.04158	6.45845	7.01501	7.19963	7.88704	7.38172	7.90083	6.6086	6.98156	7.23511	6.54284	6.55161	6.48325	7.80315	6.47938	7.61749	6.85992	7.37114	7.38017	7.66346	7.56159	7.11078	6.9026	6.24506	7.09212	6.28379	6.09505	5.90911	5.89655	6.86551	7.35565	7.40347	7.06798	7.33442	7.763	6.61682
FLT4	6.51199	5.91618	6.58683	6.12944	6.05876	5.28936	7.03945	5.72377	6.02508	5.02259	5.3149	4.40318	4.827	5.7974	5.936	5.76202	5.30842	5.21012	5.49423	5.88702	6.06762	6.11176	7.18058	6.32375	6.42136	4.50544	4.40269	4.57447	4.81024	6.35091	4.92727	4.93853	4.84058	5.04087	5.54459	5.89472
A2M	12.647	12.4781	12.6755	12.6888	12.6661	12.5483	12.7134	12.6089	12.7685	11.0584	12.1404	10.5915	10.798	12.7206	12.4084	10.9241	11.4194	10.4129	11.0913	12.6334	12.6195	12.6804	12.7973	12.5575	12.5822	9.63621	10.2795	10.1351	10.4634	12.8103	10.4067	11.2605	10.4945	9.9281	12.6818	12.678
ABO	5.178	4.61621	4.71261	4.7272	4.62107	5.08206	4.86267	5.44483	4.65693	5.11578	5.3123	4.96697	5.59096	4.47121	4.78593	5.60181	5.77738	6.02832	5.04737	4.4832	4.79479	4.78989	5.02173	4.95389	4.95141	5.70239	5.92242	5.63664	6.02981	4.51006	5.37788	5.26972	5.23022	5.08749	5.2436	4.92588
ABR	7.22717	7.12467	7.48092	7.61572	7.42039	7.31132	7.40036	7.39053	7.58116	6.62886	7.05338	6.53486	6.59686	7.1744	7.37611	6.69745	6.72668	6.63833	6.4228	7.49587	7.14966	7.61028	7.3639	7.94652	7.56794	6.25597	6.62637	6.57807	6.44358	7.50377	6.54919	6.70766	6.67481	6.41659	7.39523	7.51478
ACE	7.37202	7.4067	7.84891	7.79096	6.87455	6.46033	7.58331	7.53611	7.58251	5.84126	6.42062	5.76451	5.84434	7.65527	7.05001	6.28568	5.99567	6.03346	5.9806	7.59659	7.16568	6.79076	8.27923	8.31726	8.04727	5.44306	5.70768	5.4635	5.53193	7.70871	5.88285	6.0055	5.81426	5.64904	6.81516	7.27649
ADA	5.87373	6.01561	5.77939	5.76734	6.47011	5.76172	6.37015	5.96026	5.57092	9.85227	7.25432	8.0284	7.90627	6.23303	5.38556	8.17807	7.6423	7.56826	7.97483	5.04849	7.13513	6.02742	5.89885	5.26679	5.44771	7.64074	7.72941	7.64215	7.78679	5.94467	7.00805	6.63399	6.15888	6.30475	6.13139	5.56969
ADK	6.55987	7.03133	7.05147	7.00186	6.74829	7.26556	6.47685	7.46057	6.60346	8.0085	7.76705	7.33399	6.86696	6.84624	7.26808	7.23963	7.1581	7.4878	7.26337	7.35708	7.13682	7.24838	6.64838	7.16527	6.93887	7.64995	7.74524	7.77822	7.40066	6.62099	7.27556	7.51185	7.45863	7.44854	6.56625	6.79812
FMN1	5.06087	4.84095	5.1926	5.47908	5.44472	5.66643	5.10887	5.2327	5.48004	4.94627	5.43597	4.74849	4.9861	5.3612	6.30908	5.38374	5.58943	4.96876	5.2359	5.62365	5.50221	5.81141	5.07871	5.58553	4.97883	4.58387	4.53032	4.58006	4.68738	5.50407	4.39517	4.12405	4.13169	4.17914	4.80969	5.33592
ADM	8.80719	8.35799	7.9637	7.8981	10.2744	9.12709	9.77019	7.57075	8.40336	10.4824	9.36774	9.38132	9.23864	10.2828	7.89602	10.4787	9.33439	10.6782	10.2279	8.51622	9.1598	8.63423	7.93099	7.27423	8.04211	8.76249	8.81628	9.00714	8.41941	8.79444	11.0032	11.1778	11.0969	11.7812	9.53573	8.16129
ADO	7.19321	7.48793	7.52578	7.50491	7.34858	7.66555	7.59915	7.86242	7.62863	7.8372	7.56529	7.78899	7.73437	7.62024	7.57087	6.97342	7.20436	6.91188	6.96599	7.47073	7.54768	7.55823	7.44863	7.67064	7.32967	8.21924	8.35107	8.4055	7.82979	7.30599	7.09402	7.13442	7.19677	7.1466	7.56515	7.54663
AEN	5.92422	5.86537	5.64143	5.74169	7.31938	6.72083	6.25738	6.22353	5.92167	6.59491	6.72382	6.91578	6.72648	6.30832	6.3304	6.62243	6.52603	6.50985	6.6509	6.2024	6.37045	5.93729	5.54192	6.04841	6.35089	7.04702	7.26272	7.47541	7.17776	5.92902	7.1357	6.9148	7.15738	6.76665	6.92972	6.1841
AES	9.17641	9.4451	9.30971	9.37912	8.87529	8.98462	9.35634	8.86432	9.20148	8.32795	8.70639	8.08582	8.41932	8.92178	9.2303	8.55804	8.51813	8.44598	8.36392	9.31551	8.77061	9.32979	9.50752	9.52692	9.27923	9.0979	9.04032	8.76358	8.60652	8.89401	8.57717	8.46235	8.60076	8.51245	8.67079	9.4252
AGA	6.34478	7.30782	6.92007	7.16998	6.47987	7.179	7.09634	7.28428	7.48906	7.81972	7.2373	7.87543	7.20157	6.87725	7.22808	6.92261	7.00056	7.0142	6.96455	7.16566	6.88698	6.71124	6.5363	7.45617	6.86872	7.09036	7.10825	6.9119	7.29041	6.69749	6.80166	6.96156	7.04051	6.82412	6.64893	6.89873
AGK	6.76688	6.8608	6.59374	6.46238	6.58496	6.61859	6.56243	6.97882	6.71651	6.97416	6.90414	6.83037	6.9243	6.3206	6.59722	7.05521	7.0915	7.12878	7.22657	6.51784	6.93883	6.82348	6.64376	6.63185	6.58282	7.32567	7.32135	7.10879	6.95986	6.62265	7.95458	7.94127	8.13493	8.03228	6.63192	6.61126
AGL	8.10074	7.98108	8.27896	8.20599	7.90515	8.03487	7.83726	8.35473	8.02637	8.07756	8.49005	7.74956	7.92425	8.19834	8.13747	8.25507	8.38935	8.45526	8.45288	8.18957	8.14262	8.16839	8.16744	8.09473	8.06998	7.57663	8.08299	8.31361	6.97811	8.02199	9.25598	9.12762	9.34626	9.07184	7.90777	8.12132
FMO1	6.38828	4.80296	4.68962	5.11367	4.69468	5.64679	5.40773	5.64089	4.65393	6.83685	7.0871	7.54571	7.88406	5.35334	4.55401	8.36199	7.22283	8.47566	8.0567	4.61493	6.39492	5.16045	4.07403	4.11955	4.11031	8.10608	6.96156	7.27209	8.58156	4.98795	5.683	7.32234	5.53074	7.88822	6.50368	5.64805
FMO2	10.475	10.5965	9.73035	10.7701	10.089	9.85838	10.0385	9.48931	10.9566	7.69047	8.51738	8.36712	8.25083	10.5078	10.1797	7.33775	6.64781	7.34448	7.12909	10.6057	9.16894	10.7964	11.0075	10.3166	10.6184	6.69484	7.36053	7.10023	7.02753	10.9305	6.03365	6.34558	5.436	5.68353	9.29657	9.85823
FMO3	7.06753	7.68793	7.02735	7.51427	8.34156	7.47673	8.26028	6.94466	7.61881	6.52914	6.46963	7.23879	7.39526	7.73897	6.9275	5.55775	5.43452	5.64383	5.42475	7.32891	7.02729	8.23714	7.63781	7.21062	7.17213	7.98759	7.39429	6.98449	5.5443	7.90544	4.75168	5.43616	4.87462	4.99187	7.83328	7.51846
FMO4	5.95651	5.95486	6.11276	5.98339	6.04483	6.25087	6.22624	6.52136	5.81766	5.53274	5.89186	5.74363	6.02898	5.91149	6.24344	5.87751	6.02882	6.26357	6.17672	5.94283	6.06954	5.91692	5.76378	6.46901	6.13133	6.51093	6.25636	6.16406	6.30367	6.13592	8.04658	8.22017	8.28673	7.55277	6.22354	6.27496
FMO5	6.36897	7.62817	6.77214	6.71935	5.41086	6.55597	5.6234	6.11925	6.53744	4.28904	5.76318	4.07995	4.00735	6.04637	7.2136	4.28309	5.43269	4.07455	4.63096	8.32301	5.47785	7.65661	6.10896	6.81328	7.00356	3.74098	3.84676	3.96638	4.05003	6.67429	3.81919	4.07739	3.68137	3.47045	6.24796	6.31923
AGT	5.33387	5.41061	5.10692	5.80644	7.1832	7.20601	6.33234	5.48596	5.08253	4.91063	5.30452	4.85221	5.08336	5.49169	4.73429	4.82215	6.10736	4.75861	4.87423	5.33021	5.89519	5.24954	5.22761	5.08978	5.25728	4.27146	4.69147	5.05261	5.08587	6.51066	5.38212	5.90131	5.43172	5.44338	6.55544	6.4672
FMOD	8.7835	8.46792	8.57598	8.60384	9.07103	8.22092	9.37937	8.44281	9.02544	8.69722	9.26773	9.0289	9.32732	8.78623	8.40854	9.35621	9.4191	8.97148	9.19945	8.57935	9.52942	9.20008	8.78724	8.69973	8.59372	7.25334	7.7624	7.94031	8.5022	8.65166	7.39141	8.10138	7.53894	7.88341	8.70116	8.74941
FMR1	8.56304	8.23649	8.75223	8.83072	8.27558	8.30752	8.3449	8.38065	8.69362	8.82368	8.32281	8.82444	8.65968	8.55119	8.38108	8.05435	8.06957	8.31008	7.94977	8.76558	8.26854	8.7214	8.8094	8.40311	8.57903	7.79075	8.12532	8.42689	6.9889	8.63519	8.61273	8.54846	8.58995	8.55101	8.44458	8.26822
AHR	9.23434	8.83708	9.09111	8.93751	9.18877	8.90374	9.20732	8.9588	9.02092	8.91053	9.41466	8.62475	8.69862	9.00535	9.11857	9.13794	9.30234	9.14503	9.26651	8.97978	9.22574	9.14714	9.29574	8.64926	8.88527	8.70152	8.57847	8.17496	8.11018	8.53032	8.13477	8.51986	8.25832	8.01538	9.33067	8.80175
AIP	7.99728	8.21294	7.9404	8.02369	7.39283	7.74983	7.91622	7.914	8.04652	7.86995	7.83211	7.64968	7.55701	8.04393	7.79229	7.4958	7.46268	7.56215	7.26578	7.70855	7.79005	7.97224	8.0507	7.87449	7.90214	7.43678	7.57703	7.74146	7.36309	7.84991	7.411	7.34721	7.39547	7.51779	7.67598	8.04931
AK1	8.37283	8.90118	8.52052	8.49502	8.14806	8.5964	7.96831	8.63267	8.45395	6.97379	7.95524	6.7492	6.80683	8.17639	8.69727	7.08873	7.22543	6.77637	7.16853	8.42219	7.99079	8.64846	8.36322	9.54799	8.51649	7.50456	7.44981	7.36171	7.29608	8.14349	6.98438	7.02696	6.77756	6.69823	8.20638	8.52054
AK2	7.84634	8.0716	7.88251	7.85684	7.44085	8.08827	7.75528	8.06567	8.10718	8.22851	8.32563	7.72116	7.78523	7.88858	7.96382	7.73666	7.94861	7.25066	7.72221	8.04605	8.1763	8.22591	7.83477	8.13037	7.98659	7.64453	7.77676	8.08138	7.24704	7.84597	7.35888	7.30724	7.22598	7.32207	7.74469	7.85471
AK3	8.85696	8.98402	9.09254	9.00768	8.84151	8.62406	8.92414	8.7041	8.98513	9.55974	8.89752	8.43914	8.40188	8.97701	8.90223	8.17314	8.52625	8.0848	8.13862	9.08192	8.97227	8.83141	9.12955	8.89461	8.75613	8.58385	8.94694	8.94896	7.87089	8.74862	7.75796	8.23926	7.98531	7.88654	8.77234	8.80576
AK6	7.33589	7.10692	7.1884	7.29632	8.01199	7.47984	7.4707	7.47761	7.51701	7.67665	7.6993	7.73606	7.52011	7.54298	7.36037	7.94672	7.93287	8.22256	8.06543	7.70664	7.53202	7.63842	7.31555	7.47402	7.25895	7.75863	8.025	8.30355	7.54992	7.27812	8.24341	7.99109	8.16689	7.92611	7.8529	7.18098
AK7	4.3507	7.15194	6.02862	4.34795	5.42304	3.9519	4.12833	5.66137	3.65584	3.96531	3.79606	3.73707	3.95317	4.61103	5.02045	3.2899	4.95336	3.17813	3.2918	4.03814	3.91232	3.6358	4.49287	5.41011	5.67154	3.67108	3.55915	3.64846	3.49605	5.79045	3.40901	3.38985	3.21335	3.12611	6.40523	5.63148
AK8	5.46817	6.67006	6.1227	5.82585	5.92797	5.90384	5.459	6.24101	5.44211	6.24855	6.22883	6.40793	6.41825	6.02901	6.2261	6.13385	6.38269	6.12994	6.15719	5.47939	5.71339	5.46576	5.72459	6.275	6.28423	5.94847	6.02881	6.21904	6.16805	6.43671	5.63149	5.82995	5.55974	5.79241	6.29392	6.5054
AK9	4.68433	5.16766	5.20907	4.86553	4.40519	4.58592	4.52981	4.3799	4.85476	4.12118	4.20097	4.20776	4.23161	4.80745	4.79039	4.42199	4.51067	4.75364	4.45049	4.97218	4.25488	4.78489	5.06286	4.74142	4.94688	3.7593	3.98496	3.9581	3.7682	4.77931	4.29813	4.11913	4.15602	4.01747	4.78443	4.68771
ALK	4.78001	4.14861	3.99767	4.18411	4.37225	4.83012	4.26424	4.44644	4.63072	4.52815	5.04027	4.61781	4.69691	4.67983	4.4153	4.40752	4.36367	4.41606	4.50044	4.2098	4.88028	4.5696	4.1053	4.29914	4.45674	4.58965	4.41097	4.66753	4.85295	4.46472	6.74568	6.68809	7.18696	6.8461	4.53722	4.19961
AMN	5.49267	5.64643	5.36419	5.42937	5.66038	5.63529	5.54066	5.72793	5.49319	5.86158	5.88721	5.76139	5.96971	5.49076	5.62496	6.03342	5.90442	6.08733	5.76358	5.53017	5.59276	5.34806	5.41436	5.55674	5.54608	6.29677	6.20616	6.28149	6.6569	5.48993	6.14646	6.08807	6.106	6.01911	5.67767	5.60956
AMT	8.01691	7.67723	8.15883	7.78388	7.48623	7.55255	7.6954	7.54611	7.41667	6.39839	6.70132	6.39279	6.68513	7.61212	7.61795	6.31323	6.75048	6.26167	6.64885	7.93784	7.52527	7.64905	7.55588	7.43217	7.75536	5.75109	5.49484	5.7543	5.57441	8.1198	7.55646	7.13768	7.56958	7.27002	7.85515	7.90984
APC	6.09084	5.35638	6.25059	6.29124	5.41277	5.37581	6.29538	5.08635	6.15756	4.98694	5.16989	5.04186	4.82001	6.27721	5.61749	5.10192	5.11103	5.19365	5.45853	6.26315	5.54622	5.96781	6.27032	5.90844	6.09497	5.02931	5.14847	5.35999	4.57207	5.93795	4.44366	4.98699	4.54803	4.63301	5.26524	5.43053
APP	9.82235	9.7135	10.1379	9.94599	9.34074	9.1866	10.3883	8.11252	10.2396	10.2907	9.5414	9.87513	10.0515	10.168	9.81024	10.1058	9.69375	10.4829	10.0959	10.0845	9.79249	10.2591	9.99439	9.67375	10.1365	9.55186	9.58095	9.6366	9.13735	9.85212	9.91497	10.1008	10.1645	10.4118	9.45954	9.35783
B2M	12.69	12.5672	12.7668	12.9031	12.7199	12.6283	12.7006	12.7404	12.7513	12.6623	12.6674	12.5905	12.6588	12.7584	12.6547	12.4489	12.5508	12.4674	12.5009	12.7563	12.6812	12.8479	12.8082	12.7554	12.729	12.5324	12.5831	12.536	12.5192	12.694	12.1219	12.3717	12.2393	12.1273	12.6885	12.695
AQR	6.90249	6.81744	6.99488	7.03478	6.59618	6.77778	6.85646	6.78984	7.04045	6.40044	6.51505	6.28777	6.28407	6.89306	6.87302	6.50491	6.50832	6.41346	6.46305	6.98314	6.77055	7.01129	6.97161	7.02115	6.81418	5.94607	6.03607	6.18414	5.95954	6.74625	7.06357	6.98702	7.12926	7.08936	6.78604	6.72838
ARC	7.26553	4.45283	4.94821	5.53458	6.35144	5.65901	7.40532	4.60949	6.44232	4.31437	4.7975	4.41382	4.32654	6.12811	7.02053	5.16367	4.66696	4.51554	4.77476	5.6804	5.59098	5.86081	6.12023	4.90178	6.5327	4.59669	4.52315	4.54816	4.676	4.86045	4.43029	4.63572	4.56264	4.0875	6.547	5.0194
ARX	3.59598	5.79381	4.72349	3.38577	3.55656	3.31383	3.21828	4.17977	3.0939	3.00401	2.93959	3.24351	3.44446	4.12819	3.98812	2.90204	3.36802	2.95869	2.94842	3.43036	3.24282	3.0667	3.98148	3.93036	4.45815	3.19604	3.37012	3.4217	3.7035	4.62497	3.03494	2.91099	2.88296	3.0128	4.60765	4.32855
ASL	8.09509	8.85506	8.25432	7.95615	7.90926	8.81848	7.83498	8.52073	8.14012	7.73224	7.98782	7.30826	7.44268	7.79309	8.72657	8.41597	8.16405	8.25882	8.36992	8.49543	8.29418	8.65271	7.93809	8.64604	8.34035	6.5816	6.66327	6.58919	6.69511	7.95977	8.29415	8.17687	8.49907	8.04535	7.96236	8.34188
ATM	6.88398	6.31345	6.90606	6.9727	6.36966	6.3055	6.64085	6.57544	7.04712	6.76733	7.24813	7.12513	7.28201	6.99335	6.88033	6.6011	7.06792	6.80884	6.65155	7.03149	7.15037	6.97359	7.10453	7.00782	6.93998	6.28917	6.84876	6.64325	6.6307	7.24348	6.46979	6.86949	6.72911	6.74919	7.05854	6.97165
ATR	6.85398	6.86769	6.91488	6.994	6.46801	6.70035	6.72104	6.93135	6.88874	7.12629	6.81377	6.86711	6.72817	6.8573	6.89335	6.9535	7.20284	7.0117	7.22132	7.0788	7.10583	7.01736	6.74086	6.90077	6.9044	7.60247	7.32876	7.10507	7.04153	6.88777	7.86365	7.76283	8.17358	7.4741	6.96707	6.76831
AUH	7.99873	7.98324	8.03544	8.05034	7.53395	8.10592	7.68882	8.14857	8.17716	7.20072	8.00067	7.55147	7.56889	7.80074	8.15226	7.39302	7.72154	7.46076	7.56005	7.84891	8.04169	7.84571	8.20738	7.90381	7.93846	7.70986	7.86224	7.82925	7.52212	8.19634	6.68618	7.10234	6.70192	6.89107	7.85865	8.02413
AXL	7.5683	7.91432	7.58595	7.86753	8.05574	7.70695	8.20399	7.93327	7.7029	7.15564	7.54723	7.7893	7.92963	8.03845	7.73634	7.15468	7.16143	7.00339	7.08418	7.72695	7.38646	7.88154	7.89981	8.06613	7.70415	6.40581	6.88531	7.12627	7.13206	7.78784	6.11193	6.61136	6.26805	6.6458	7.68968	8.4556
TGFBR1	7.9556	6.57007	7.48707	7.7968	7.76498	7.54857	7.36952	7.49325	7.77552	6.7742	6.83116	6.87608	7.16655	7.37972	7.64978	6.93078	7.49298	6.939	7.20607	7.46682	7.33626	7.71509	7.46989	7.76444	7.29433	6.73483	6.45348	6.19625	6.61454	7.69678	5.85053	6.22416	6.16651	6.06557	7.55983	7.42624
TGFBR2	8.2594	7.95245	8.92763	8.97092	7.81027	8.04064	8.73605	8.05058	8.71878	6.83968	7.72714	7.10017	6.9963	8.76403	8.23297	7.16311	7.30773	7.0409	7.21187	9.59318	8.16581	8.86134	8.8264	8.5366	8.65757	5.9902	6.35771	6.33514	6.68382	8.68995	6.12792	6.73498	6.3133	6.2155	8.35854	8.24503
TGFBR3	9.43092	8.81511	9.64914	9.60606	9.18675	8.95131	9.08949	8.57405	9.92319	7.39753	7.70521	6.86699	6.60459	9.64141	9.0574	6.646	7.26579	7.02157	7.03791	9.76088	8.32712	9.57314	10.6168	8.93539	9.32933	7.52236	7.55984	7.45024	6.96321	9.37986	6.38205	6.76511	6.5607	6.78383	9.24248	9.08908
BAD	7.29106	7.75864	7.35521	7.2453	6.9443	7.13809	7.28348	6.9829	7.38023	7.54692	7.19621	7.42016	7.18075	7.09546	7.12472	7.75191	7.20743	7.80617	7.64346	6.94495	7.11957	7.08014	7.18005	6.97884	7.08193	7.22579	7.68232	7.74916	6.37747	6.88763	7.16404	7.03862	7.09116	7.23644	6.97787	7.10198
BAX	5.54315	6.37948	5.75755	5.62597	5.63126	5.99474	5.813	5.71639	6.29267	7.85282	6.62882	6.80784	6.45698	6.06416	6.04487	6.1366	6.17221	6.1408	6.06463	5.35302	6.27557	6.04589	5.16582	6.06756	5.75791	6.34026	6.7413	6.81618	5.98966	5.60627	6.65365	6.58038	6.70575	6.51545	5.92452	5.72097
BBX	7.7515	7.40541	7.8456	7.76498	7.56771	7.51547	7.77739	7.18629	7.90314	7.47843	7.65019	7.58851	7.402	7.66897	7.72508	7.57848	7.50261	7.7766	7.54773	7.76984	7.63314	7.68638	8.06047	7.57294	7.671	7.3553	7.45227	7.16141	7.06992	7.68628	8.23805	7.83373	8.0441	7.86627	7.77327	7.69092
BCR	7.09165	6.87916	7.38814	7.30804	7.18858	7.18965	7.49775	6.9576	7.28285	7.55196	7.17102	7.42502	7.38969	6.82514	7.30114	7.96083	7.83121	8.09764	8.00866	7.10028	6.90527	7.60343	7.54745	7.16505	7.32332	7.32207	7.33654	7.67131	7.36749	6.71978	7.22854	7.2237	7.38593	7.03193	6.92738	6.94647
VOPP1	9.26103	9.56021	9.33407	9.18301	9.13061	9.32616	9.46496	9.684	9.29696	10.1034	10.2589	10.4941	10.3282	9.54358	9.23556	9.95344	9.89234	9.9042	9.9482	8.91169	9.86989	9.25734	9.27053	9.35342	9.1915	10.8943	10.7794	10.4674	10.8347	9.25057	8.59211	9.29604	9.02977	9.4334	9.24558	9.44247
BGN	9.61985	8.95334	9.14877	9.43721	9.644	8.90181	10.12	9.03836	9.281	9.83931	9.73115	9.56407	10.0828	9.1282	8.89312	10.4746	10.2749	10.1102	10.1439	8.7007	9.98628	9.34478	9.16698	8.98427	9.00295	7.92274	8.66041	8.55041	9.33963	9.11838	8.38514	9.01425	8.33834	9.43443	9.26203	9.22037
LINC00921 /// ZNF263	7.73111	7.40593	7.62645	7.61274	7.92048	7.55863	7.55475	7.25768	7.44797	7.20326	7.2771	7.16551	7.21779	7.78456	7.38086	7.24896	7.12477	7.25265	7.34047	7.55094	7.50224	7.36268	7.53196	7.43284	7.38774	7.38079	7.4294	7.6086	7.15359	7.55013	6.86413	6.79696	6.71147	6.58862	7.61361	7.314
BID	6.64819	7.24696	7.01604	6.92742	7.31017	7.02723	7.01876	7.37787	7.12043	7.47704	7.04426	7.42828	7.30377	7.24228	6.81101	7.46501	7.29566	7.09162	7.33907	7.01384	7.35967	6.77614	6.53821	7.26587	6.67065	7.98233	8.01307	8.14445	7.49316	6.94803	6.65631	6.79906	6.79266	6.59594	6.95441	6.96204
BIK	5.32494	7.15654	5.56284	5.39059	6.20193	6.10174	4.89527	6.29786	5.16082	8.93459	7.57928	8.61673	8.47729	5.49276	5.89195	7.26799	6.9654	7.39044	7.01502	5.06307	5.73776	4.99865	5.3217	5.57919	5.6281	7.59092	7.62047	7.89041	7.48719	5.7782	7.59714	7.23421	7.52601	7.39301	6.18648	5.88498
FNTA	8.88293	9.23459	9.27836	9.43148	8.63325	8.69799	8.87696	8.84442	9.29795	8.69905	8.80214	8.81466	8.87809	8.98046	8.92476	8.54756	8.61496	8.48705	8.49703	9.46112	9.05861	9.17455	9.432	9.16411	8.8889	9.41845	9.29981	9.54143	8.90231	9.11072	9.59027	9.62077	9.703	9.80318	8.73541	8.68745
BLK	4.65322	4.94223	3.82421	4.52935	4.39347	6.68864	4.13031	5.38512	4.32491	5.42419	6.87521	4.94581	5.61715	4.43665	4.72461	4.71301	5.68246	4.61271	4.7878	3.74236	5.42792	3.74497	4.25802	4.39514	4.40347	4.89675	5.23764	5.39849	5.24023	5.24058	4.4825	4.60974	4.51843	4.14093	4.68539	4.84386
BLM	4.37075	4.5038	4.42466	5.13076	5.16262	4.76314	4.83624	6.04792	4.85598	6.77541	6.30562	7.19822	7.08921	5.20239	5.14526	6.24343	6.21892	5.75922	6.46634	4.97449	5.51155	4.56907	4.93679	5.48214	4.62214	7.11571	7.28367	7.40131	6.50227	4.80641	7.36639	6.95515	7.4719	6.51725	4.98913	5.14862
BMF	7.25736	7.15214	6.94178	6.82644	6.31196	6.67526	6.81128	7.19845	6.96644	6.7352	7.4574	6.94168	7.29488	6.35389	7.0806	7.04534	7.28048	6.63193	7.02956	6.01322	7.76261	7.1315	6.89949	7.24322	7.06408	6.62107	6.89983	6.89741	7.19745	7.31303	6.25524	6.63606	6.59489	6.50087	6.42527	7.05263
BMX	5.42504	4.97907	4.7895	4.51473	5.75807	4.60757	5.46162	4.42768	4.61127	3.85909	4.07132	3.75801	4.03003	5.15922	4.74519	4.03586	4.62354	3.7133	4.25383	5.50359	5.29358	4.58177	4.80651	3.98148	4.07443	3.45654	3.67385	3.7065	3.64622	3.96531	3.56716	3.96793	3.52124	3.33324	4.42565	4.51197
BOC	7.25183	6.25529	6.74096	6.32565	6.52231	6.49731	7.10714	6.3837	6.16905	6.63818	6.73717	7.15984	7.16173	6.76046	5.99906	6.59673	6.55045	6.38383	6.44653	6.12915	7.32242	6.47193	6.41118	5.84003	6.31052	6.4969	6.35435	6.50661	6.6688	6.79905	5.39914	6.14734	5.46899	5.92306	7.04092	6.98001
BOK	8.19193	8.22754	8.09862	8.21613	7.62831	8.35496	8.55628	8.34018	8.29927	7.15123	8.10281	7.0446	7.30518	7.67196	8.53375	7.83583	7.92503	7.80366	7.66174	8.00289	8.12285	8.31956	8.14048	9.03479	8.38413	6.20758	6.04888	5.51291	7.03462	7.65167	6.42382	6.85759	6.43667	6.40668	7.23733	8.19783
C1D	8.20967	8.29518	8.20583	8.34777	8.00927	8.29236	7.93702	8.39343	8.47366	8.66973	8.31134	8.38851	8.41529	8.1359	8.24588	8.17453	8.35353	8.48812	8.24898	8.39108	8.28972	8.47997	8.45542	8.35159	8.08555	9.08326	9.06277	9.14738	8.24562	8.17426	8.98335	8.97581	9.03852	9.20448	8.20638	8.17498
C1S	9.22175	8.61428	8.99157	9.60972	9.28454	8.80596	10.2029	9.16221	9.51141	9.79367	10.2119	10.2929	9.72977	10.1366	8.88168	9.68887	9.68394	9.4876	9.55111	9.6767	10.2678	9.93924	8.95958	9.24486	9.02186	9.21096	9.16966	9.18301	9.56722	9.80723	7.46926	8.66051	8.15553	8.37228	9.77049	9.51005
C1R	10.3933	9.97312	9.70885	10.026	10.1911	10.1196	10.7513	10.2813	10.1199	10.7019	11.035	10.8026	10.9291	10.471	9.89388	10.9832	10.9824	10.8748	10.8295	10.3116	11.075	10.5874	9.56197	10.0257	9.99094	9.92805	10.084	9.89975	10.3881	10.4825	8.80956	9.77523	9.13881	9.68912	10.4347	10.1538
BRE	7.43952	7.71014	7.32242	7.35228	7.76309	7.72592	7.30359	7.75269	7.43135	7.51591	7.67651	7.64842	7.84091	7.47771	7.63079	7.50655	7.60061	7.49574	7.78023	7.30991	7.7363	7.38029	7.33992	7.46695	7.41106	7.79626	7.88831	7.90663	7.813	7.59308	7.67675	7.65498	7.63455	7.68864	7.59618	7.6541
BSG	7.66082	8.52134	7.88304	8.1904	7.90862	8.51367	8.98239	8.5935	7.7368	8.59498	8.28611	8.12124	8.26411	8.01814	8.51659	8.57109	8.21614	8.39483	8.22387	7.90185	7.88553	7.65442	7.69656	9.24774	8.33276	8.31343	8.43331	8.57242	8.17405	7.54675	8.92894	8.45253	8.6807	8.87068	7.77523	8.22606
BTC	5.23701	6.07616	5.98231	5.99313	5.25685	5.19143	4.40686	6.10051	5.60033	4.99358	4.55107	4.65404	4.65464	5.06973	5.8067	4.00801	4.47086	3.99169	4.24115	5.28086	4.51277	5.13835	5.84832	5.5155	5.52682	5.09595	5.64018	6.27749	2.76148	5.68209	3.63887	3.91613	4.10717	3.16656	5.89337	5.6041
BTD	6.15773	6.35694	5.97524	6.26467	5.9197	6.21421	6.19293	5.98759	6.39037	5.52317	6.06188	5.75358	6.04054	6.02547	6.10129	5.28056	5.55351	5.23357	5.13852	6.23608	6.17739	6.21585	6.09962	6.4088	6.17169	5.49807	5.81433	5.82252	5.98977	6.01296	6.02055	5.89238	5.96348	6.02693	6.08035	6.47907
BTK	6.98884	8.04737	7.53046	7.50386	7.46369	7.84228	7.41399	7.92844	7.77956	6.57967	7.15372	6.73337	6.81986	7.6057	7.65325	6.58005	7.07549	6.17956	6.56893	7.35333	7.53981	7.42063	7.20626	8.19669	7.57143	6.49118	6.92703	6.97272	7.21219	7.57089	5.53555	6.33596	6.07594	5.31895	7.53126	8.18621
C8B	6.13024	6.59554	5.47488	7.64524	6.05654	5.70379	5.90407	4.99352	8.44962	4.48509	4.7397	4.62711	4.48057	5.53238	5.50887	4.74704	4.87798	4.68881	4.88736	7.20304	4.53924	6.47304	7.29486	6.90008	6.637	4.61533	4.55827	4.6824	4.62777	7.90276	4.54243	4.48063	4.60272	4.44578	6.31851	6.44551
CA3	5.71219	4.22547	4.00989	5.32912	6.25223	6.36338	6.0774	4.44384	5.42961	2.72427	3.8317	2.88651	3.17648	3.49417	7.43525	2.84034	2.87165	2.8244	2.93101	4.9153	7.78232	6.55793	5.34512	4.65356	5.45075	3.05059	2.84497	2.85716	2.77483	6.27582	3.04106	3.60037	3.12078	2.79919	6.32892	4.73761
CA2	9.25759	9.25526	8.75443	9.41302	9.53169	9.18154	9.41815	8.4448	9.5922	6.52361	7.58518	6.61788	6.91729	8.53286	9.54112	8.83072	8.17897	9.24173	9.07803	9.97381	8.89454	9.99896	9.54629	9.1742	9.50818	8.11159	7.51184	6.31007	7.28707	9.76814	7.78401	8.07887	7.12794	8.83933	8.2855	8.50109
CA4	8.01745	9.39264	8.53478	9.60618	8.05792	8.3559	7.2135	8.54275	9.00072	4.40677	5.32119	4.08307	4.19845	8.92153	8.8994	4.39968	4.45045	4.38551	4.21405	9.76928	6.10404	8.40969	9.06552	8.88065	9.10393	4.40618	4.34893	4.27031	4.42356	9.10642	5.0034	4.57609	4.66555	4.40874	8.89944	8.66616
CA7	4.78393	4.72754	4.84359	4.68278	4.72567	5.05145	4.95753	5.10334	4.7472	4.99716	5.17315	5.16772	4.98466	4.9943	4.94561	5.08263	5.17836	5.42669	5.21473	4.86649	5.13713	4.9026	4.57868	5.01474	4.96329	5.30975	5.16444	5.41158	5.53726	4.84452	5.10642	5.21773	5.11097	5.33316	4.9734	5.10229
CA6	4.61952	4.90673	4.65471	4.44475	4.66852	4.80957	4.58992	4.73312	4.5115	4.76554	4.873	4.98586	5.0591	4.53033	4.70809	5.10503	4.94773	4.92932	5.10867	4.36549	4.55093	4.59011	4.41027	4.71116	4.75621	5.38527	5.19274	5.21937	5.42237	4.65166	4.74628	4.89878	4.81087	4.70411	4.58108	4.73395
CA9	4.662	4.99624	4.74917	4.75287	5.16224	4.89153	4.8749	5.04249	4.57335	7.89005	6.25744	6.85209	6.87365	4.67731	4.97491	6.03911	5.14443	6.32089	6.13155	4.77616	4.93593	4.6573	4.75343	4.80473	4.96505	6.39541	5.92159	5.53476	6.34093	4.59234	7.80822	8.43469	7.99719	10.2082	4.86086	4.91859
CA8	4.4648	4.5745	5.01474	4.08527	5.30693	4.409	4.80116	4.60979	4.21089	3.89894	4.03163	3.86214	3.7794	4.23812	4.77304	4.30635	4.59646	4.05679	4.58959	5.56735	4.15628	4.68379	4.06101	5.03452	4.91351	4.02879	4.00141	3.94947	4.05261	5.55481	3.83949	3.86098	3.61546	3.74132	4.59454	4.30829
CAD	6.96677	6.89162	6.98515	6.94912	6.63607	6.80045	7.17986	7.38626	6.80459	8.18347	7.62832	8.03801	8.40162	6.519	7.07576	7.96786	7.78326	7.99182	8.18123	7.01617	7.43098	7.15842	6.86188	7.33344	6.93321	8.61934	8.63325	8.74913	8.56998	6.95014	8.79135	8.54597	8.95973	8.57448	6.85117	6.91667
CAT	10.2662	10.3917	10.8797	10.6977	9.59284	10.2779	10.1935	10.1589	10.6244	8.86126	9.65213	8.80207	8.35595	10.4647	10.5576	8.08519	8.64334	7.75011	8.12411	10.4959	9.91491	10.5092	10.7892	10.9245	10.4434	7.60854	7.71866	7.84153	7.63853	10.1504	8.82938	8.86561	8.91109	8.939	9.87755	10.5906
CBL	6.45424	5.95749	6.68347	6.52436	6.62357	6.34894	6.43788	6.1488	6.6017	6.77366	6.51014	6.71036	6.3199	6.46164	6.57359	6.34345	6.45561	6.47652	6.31124	6.17077	6.43189	6.40208	6.48796	6.46061	6.14336	6.23525	6.40322	6.22775	6.28464	6.11427	6.6513	6.40404	6.51473	6.66723	6.30074	6.46213
CBS	6.52487	5.78391	5.73177	6.1489	6.05681	6.29053	6.17981	5.82585	5.46468	6.84941	5.92656	6.55652	6.37049	5.51347	6.69814	5.48839	5.34844	5.68914	5.41466	5.11119	5.93822	6.34962	6.47949	7.03238	6.43183	7.54968	8.07575	8.6627	6.49334	5.64602	8.02634	7.76746	8.55702	7.13132	5.54801	5.37527
CD2	7.37739	8.20249	7.44863	7.83638	8.09704	7.41011	7.5741	8.83756	7.54342	8.39652	9.53985	9.12149	9.29341	8.65245	7.50239	8.17751	8.53828	7.12544	7.86408	7.48346	8.43548	8.14535	8.39536	7.48645	7.67236	8.30701	8.83123	8.86691	8.61269	8.2452	6.11054	6.89489	6.53935	6.08457	7.69691	8.26581
CD4	8.34065	8.65607	8.42329	8.43431	8.35519	8.45452	9.57886	8.95781	7.99905	8.20238	9.32559	8.06856	8.74725	9.02633	8.51393	8.54771	8.7733	7.8359	8.174	8.4578	9.58496	8.80518	8.65498	9.27095	8.82749	7.18083	7.46232	7.56368	7.44488	8.21254	6.96511	7.63815	7.14399	7.06987	8.62047	9.11194
CCS	7.37119	7.40503	7.25772	7.2812	7.14093	7.39989	7.15909	7.15536	7.27707	7.31676	7.27055	7.1289	7.1087	7.25603	7.06917	7.4846	7.16824	7.54553	7.44158	6.90396	7.39743	7.13359	7.29576	7.18533	7.15831	6.55471	6.68524	6.71532	6.60015	7.37966	7.1954	7.09403	7.12524	7.23712	7.28729	7.25118
CD6	5.15224	5.25029	5.17849	5.05893	5.28293	4.98856	5.62239	5.80958	5.06809	5.60729	6.1473	5.96397	6.01844	5.55801	5.47723	5.81768	5.89498	5.69951	5.79093	5.219	5.47282	5.34968	5.29088	5.57455	5.61899	5.7764	5.97014	6.10781	6.28679	5.30772	5.56872	5.70565	5.55328	5.63304	5.14308	5.77717
CD5	5.27943	5.30491	5.14127	5.43618	5.71127	5.40975	5.80123	5.9767	5.2609	5.95434	6.7055	6.164	6.33052	6.16008	5.28286	6.03852	6.22775	5.65387	5.87536	5.29597	6.02131	5.80188	5.49583	5.41699	5.4459	5.91795	6.1194	6.14871	6.04287	5.3532	5.35253	5.3891	5.11013	5.26455	5.30669	5.5933
CD7	5.27211	5.03214	4.90684	5.11195	5.2914	5.04635	5.11033	5.67434	4.88131	5.91168	6.53187	5.72483	6.1998	5.4316	5.16031	6.20008	6.39684	5.72424	5.67464	4.98133	5.21054	5.02031	5.63064	5.40871	5.21463	6.05961	6.35665	6.17764	6.03755	5.04037	4.94511	4.90706	4.99418	4.85146	5.09069	4.93689
CD9	11.7396	12.1243	12.0997	11.683	11.6808	12.1071	11.7576	11.9903	11.9567	11.9763	11.4838	11.9481	11.9054	11.7151	12.0243	12.057	11.8653	12.3063	12.0216	11.8194	10.7216	11.8966	11.7808	12.1995	11.9399	12.2857	12.3252	12.4595	11.6902	11.5893	12.2784	12.3483	12.434	12.3657	11.3052	11.7523
CDA	5.33618	4.91238	4.67222	5.22704	6.06018	5.38188	5.23958	5.69232	4.85357	5.89749	5.61031	5.81701	6.01162	5.44575	4.85074	5.36159	5.09477	4.98317	4.9619	4.64055	5.435	4.66302	5.05343	4.69137	4.23821	4.90261	4.50634	4.97171	4.95132	4.64034	5.00512	5.26079	4.82698	4.76339	5.10543	5.14685
CEL	4.61563	4.70428	4.27625	3.99004	3.72121	3.97998	4.01094	4.41914	3.80794	9.84536	7.8797	9.27572	10.1475	4.01734	4.23194	5.99927	6.14318	8.32048	8.52609	3.91525	3.68653	4.26182	4.15488	4.2344	4.51227	7.6687	7.39426	5.02095	6.00542	4.59882	7.48636	6.20418	6.3046	6.04649	4.46334	4.609
CFD	10.5228	10.8798	10.8358	11.2532	10.2627	11.0728	10.3814	10.5631	11.2125	8.38192	9.64597	8.29235	8.36361	10.9262	10.5099	7.08454	8.03049	6.24114	7.02646	11.2409	11.0183	11.1188	10.7334	10.6585	10.6752	7.45608	7.66099	7.41841	7.87225	11.0118	7.77737	8.5784	7.98436	7.14824	10.7097	10.94
CFH	8.8596	9.5439	9.04571	8.84573	8.73538	8.14786	9.43194	8.67125	8.03858	8.9157	8.64426	8.97449	9.244	9.79208	7.72002	8.70796	8.66188	8.66265	8.78359	8.42353	8.82384	9.2564	8.54586	7.81493	8.14451	7.88337	7.6938	7.14781	7.74878	8.80051	9.21213	9.26434	9.26643	9.62382	9.26623	9.22563
CFI	7.86052	7.71152	8.02911	7.67705	7.23657	7.2769	7.84708	7.56607	7.78891	7.428	8.21158	7.07368	6.39922	8.25579	7.96768	7.45039	7.43659	6.97628	7.13002	7.65883	8.74171	8.24079	6.97035	8.04064	7.86099	5.17837	5.25391	4.81045	5.35363	7.81821	7.11279	7.11223	6.79052	7.42672	8.00584	7.94234
CFP	6.6118	7.29599	6.43002	6.56905	7.06695	6.57881	6.26398	7.1864	6.08243	4.99791	5.91285	4.69874	5.10498	6.20636	6.24877	6.11981	6.71024	5.06409	5.84052	5.97589	7.89037	5.83978	5.97429	6.10007	5.9099	4.8012	5.133	5.08472	5.16942	5.70307	5.00123	5.36447	4.99772	4.68756	6.61922	6.84617
CGA	3.71535	3.93996	3.63514	3.77147	4.14402	4.04682	5.00638	3.95613	3.823	3.7838	3.66324	3.67287	3.78903	3.80811	3.96873	3.77276	3.91984	3.85228	3.89927	3.69136	3.9165	3.87355	3.94628	3.77785	4.0476	3.78332	3.63237	3.85133	4.00476	3.91203	3.68801	3.70788	3.5747	3.9262	3.95232	4.10738
CGN	7.78788	7.3393	7.99575	7.38873	7.5141	7.68163	7.21539	7.00932	7.52099	5.82713	6.30146	5.32155	5.17927	7.66386	7.54612	4.98146	5.69539	5.31083	5.30527	7.673	6.29601	7.60863	7.6083	7.36177	7.84374	4.9497	4.89608	5.25097	4.75539	6.86628	5.67508	5.56526	5.5557	5.12622	6.76749	7.38483
AMIGO3 /// GMPPB	5.50246	5.87683	5.22292	5.47177	5.48551	5.82176	5.57748	5.58679	5.81072	5.47266	5.57188	5.71035	5.79565	5.35783	5.36788	5.59121	5.61366	5.76722	5.61599	5.63187	5.99139	5.95381	5.67416	5.70511	6.04334	5.98103	5.72772	6.05	6.16267	5.8088	6.08985	5.88895	5.99868	5.96958	5.59201	5.32438
CHM	7.27649	7.1192	7.17138	7.22596	7.00966	7.0246	7.12801	7.50245	7.32456	6.94455	7.05973	6.89656	6.96479	7.2111	7.31667	6.78529	7.03841	6.92682	6.98046	7.14734	7.14878	7.19724	7.42655	7.19261	7.14183	6.93554	6.90184	6.72756	6.58298	7.1095	6.99531	7.02105	7.01111	7.36132	7.04337	7.11434
CIC	7.75687	7.35502	7.49364	7.48253	7.68126	7.68501	7.85545	7.52589	7.58849	7.64834	7.77447	7.74662	7.89985	7.30601	7.58779	8.01695	7.86588	8.11146	7.84788	7.47544	7.60646	7.60884	7.63319	7.58414	7.76241	8.20952	8.00073	8.04584	8.42857	7.69573	7.8513	7.7708	7.77112	7.96981	7.7002	7.5291
CKB	8.63422	9.36894	8.76001	8.71183	8.61443	8.90585	8.81301	8.65473	8.72371	9.46719	8.489	8.6967	8.60171	8.82787	8.69547	6.47823	7.36739	7.1596	6.65661	8.79233	7.74356	8.73395	8.84949	8.56174	9.0027	7.42234	7.64257	8.04847	7.16509	8.6496	9.44962	9.00564	9.34584	8.99198	8.65824	8.53612
G0S2	9.1237	8.66417	8.29534	9.27198	10.5122	9.87638	9.16697	8.75362	8.93904	8.26219	8.7087	7.73808	7.98156	9.53811	8.71485	9.61941	9.09775	9.21548	9.27585	8.45378	9.30997	8.85199	8.63224	8.45773	9.03468	8.13403	8.17328	7.66288	8.30612	9.77937	8.4635	8.66454	8.46475	8.77891	10.0628	8.7707
FOSB	12.6435	8.85662	7.02741	10.6999	12.0914	11.8892	12.516	10.1047	10.9442	6.8389	8.01948	6.74077	6.56807	11.2777	12.1886	9.45349	10.7705	9.70468	10.1682	11.3076	10.9103	11.7229	9.89509	7.63818	12.0229	6.19591	6.87221	5.55838	5.99132	12.0243	7.90004	8.75379	7.71704	7.30612	12.3991	11.0523
CLC	5.57285	3.65871	3.88698	3.5306	4.72401	4.03985	3.72772	4.45603	3.66082	5.33921	7.40864	6.74846	6.91262	3.91359	3.5559	4.2031	4.83899	4.11566	3.87621	4.99004	4.44704	3.55064	3.52839	3.55868	3.92449	5.84606	5.6367	6.17098	5.06904	3.7182	4.00421	3.98919	3.99758	3.90165	3.54883	3.57174
CLU	10.1406	10.5693	11.0752	10.3968	10.4698	10.0745	11.1597	10.4189	10.3733	9.52589	10.4845	8.01366	8.35376	10.4936	10.1056	9.28258	10.4462	9.30983	9.43333	10.6705	10.4606	10.5199	10.6669	10.5706	10.235	7.15858	7.94673	7.92266	6.88331	10.8303	8.35962	9.24308	8.48442	7.91569	10.8753	10.6993
CNP	6.70422	6.69415	6.44304	6.50249	6.53706	6.74649	6.6075	6.76505	6.53935	7.48403	7.16679	7.71846	7.62796	6.63347	6.57189	6.97473	6.82682	7.05497	7.15491	6.44691	6.94045	6.67136	6.54127	6.49573	6.48722	7.0897	7.07942	7.07116	6.97497	6.48444	7.48536	7.51141	7.65231	7.31163	6.63538	6.54431
CPD	7.35712	7.34518	7.59017	7.38766	7.64066	7.37487	7.53176	7.48708	7.59167	8.59517	7.959	8.37745	8.15485	7.58308	7.13446	8.47101	8.49358	8.51437	8.49829	7.73663	7.70158	7.41199	7.62304	7.68333	7.45882	7.6166	7.46718	7.39919	7.20403	7.26333	7.99494	8.22177	8.01308	8.20473	7.58038	7.16559
CPE	8.2749	8.32966	8.28487	8.59599	8.90892	8.35101	8.59014	7.84648	8.67254	9.95469	8.64506	10.0285	9.93688	8.38308	7.52824	8.40956	8.4054	9.49262	8.81366	8.41166	8.40804	8.98667	7.81067	8.22329	8.01269	7.45707	6.58973	6.61863	7.42677	8.48503	6.62201	7.28223	6.31699	7.06534	8.58464	8.41408
CPM	8.65473	9.30348	9.69613	9.26128	8.41688	8.83457	8.93436	8.58717	9.29719	7.13662	8.77946	6.66043	6.60197	9.5418	9.60379	6.95054	7.63739	6.65185	7.18197	9.52803	8.78921	9.54322	8.98126	9.47463	9.24626	5.94097	6.37465	5.93537	6.38612	8.61588	5.88183	7.15482	6.4803	5.12458	8.36642	8.95603
CPQ	7.41426	7.73499	7.64551	7.44275	7.47504	7.43504	7.42334	7.56626	7.90865	6.93415	7.61915	7.26993	7.34643	7.94365	7.59212	7.34338	7.17463	7.42946	7.03305	7.61753	7.93153	7.91458	7.75395	7.50892	7.25958	6.52196	6.56895	6.36818	6.66172	7.65999	5.87141	6.64037	6.05577	6.05545	7.53045	7.68857
CR2	4.37459	4.48363	3.44691	3.61675	4.47828	5.31206	4.22608	4.96868	3.64148	4.39756	7.47629	3.90635	3.93955	4.00375	3.95	4.05309	5.41874	3.67623	4.07935	3.47268	6.79676	3.5239	3.67433	4.23613	4.34302	3.82352	4.65182	4.2281	4.23184	4.77567	4.06693	4.83332	3.88514	3.51906	4.11425	5.31712
CR1	5.57155	5.23939	4.69749	5.08603	6.431	6.29251	5.91623	6.15696	5.0768	5.28081	6.76968	4.99334	5.28921	5.10021	6.14593	4.67251	6.24963	4.00104	4.63625	4.92865	7.36343	4.71928	5.26259	5.6638	4.70503	4.21618	4.90541	4.73903	4.7221	5.33692	4.65774	6.08827	5.14322	4.55244	6.63913	5.99221
CRK	8.18516	7.73053	8.49118	8.5878	8.18563	7.95534	8.77221	7.91404	8.60916	7.29919	7.86546	7.54634	7.11196	8.60249	8.25455	7.43764	7.47717	7.37723	7.55835	8.77081	8.05696	8.68455	8.61276	8.40706	8.44758	7.66137	7.53003	7.71558	7.51331	8.25157	8.49722	8.32436	8.56321	8.28456	8.12454	8.07215
CSK	8.04111	8.36345	8.04808	8.36054	8.05187	8.15616	7.75776	8.59393	7.94974	8.26121	8.69625	8.57643	8.85688	7.75254	8.1309	8.64501	8.56558	8.56271	8.55	7.53329	8.50435	7.99371	7.88255	8.23098	7.97251	9.21487	9.34824	9.44909	9.02789	8.03638	9.04437	8.90349	8.98893	8.64287	8.00398	8.14637
CPPED1	6.46234	6.56948	6.79618	7.02851	6.46095	6.45041	6.62859	6.88571	6.90905	5.77811	6.05162	5.33026	5.44098	6.98501	6.52928	5.33162	5.79365	5.48901	5.5545	6.74432	6.31824	6.68647	6.57425	6.76482	6.33872	5.13981	5.57815	5.59686	4.90017	6.56062	4.87135	5.14281	4.82392	4.83744	6.50199	6.63613
CTH	5.24085	4.38797	4.07471	4.38994	4.62935	5.31737	4.19631	4.3346	4.81317	4.10172	4.37248	4.30472	4.50671	4.47679	5.10762	4.7471	4.60956	4.94234	5.03502	4.27997	5.14994	4.90686	4.72236	4.15819	4.42355	5.20944	5.88068	5.9124	4.86859	4.26888	5.42814	5.24995	5.24285	5.3177	5.04711	4.46685
FPGS	7.12482	7.59203	6.76973	7.15359	7.38738	7.56337	7.53722	7.74812	7.15495	7.27653	7.44849	6.93856	7.34303	7.34366	7.51825	7.49715	7.54487	7.20783	7.51844	7.28023	7.53291	7.448	7.0202	7.72094	7.44592	7.94122	7.78027	7.83342	8.15741	7.1727	7.12358	7.00192	6.98965	7.03831	7.06763	7.3574
DAK	5.63134	6.26786	5.99063	5.94172	5.72104	6.28241	6.20553	5.95655	6.08316	6.41436	6.19409	6.13057	6.06872	6.20946	6.24959	6.20844	5.9799	6.43045	6.42199	5.67355	6.07838	6.05533	5.90485	6.39852	5.78171	6.24325	6.3913	6.44666	5.78839	5.95823	6.75072	6.62128	6.88649	6.64037	6.00542	6.17229
DAP	8.3617	8.71535	8.52961	8.35198	8.34575	8.63036	9.12451	8.712	8.88626	9.03214	8.98783	8.88816	9.059	8.44529	8.73153	9.32287	9.17847	9.41315	9.34387	8.35343	8.92109	8.64279	8.55024	9.00718	8.63928	8.896	8.87801	8.72046	8.8946	8.48386	8.89866	9.05632	8.99406	8.94065	8.37554	8.49652
DBI	10.7393	10.96	10.6684	10.5864	10.4727	10.8876	10.6633	11.0008	10.8809	10.6411	11.1186	10.9084	10.7744	10.7228	10.9097	10.3115	10.5086	10.2692	10.3167	10.7823	11.1178	11.0024	10.4064	11.211	10.8177	11.1546	11.1222	11.1474	10.9015	10.9838	11.5465	11.3304	11.5314	10.9066	10.634	10.8754
DBP	6.35133	6.95843	5.98984	6.75469	5.24219	6.06631	6.22426	6.69705	6.63632	6.28691	6.5427	6.17699	6.48006	5.70572	6.59381	6.72947	6.17926	6.85399	6.41922	6.35889	6.45998	7.08875	6.34542	6.72548	6.74909	7.31551	7.40513	7.64458	6.61511	7.17099	5.71636	5.87843	6.05367	5.73049	6.32463	6.12055
DBT	5.91437	5.79203	5.80968	5.75829	4.4432	5.92303	5.02701	5.83674	5.95588	5.22731	5.34904	5.23956	4.89785	5.35952	5.80636	5.25255	5.18618	5.64128	5.32501	5.65628	5.84745	5.91338	6.12317	5.82354	5.27848	5.24515	5.55671	5.89784	5.46623	5.39581	6.90007	6.69866	6.92525	6.67952	5.33344	5.56121
DCK	7.12024	7.38747	7.27665	7.37272	6.64862	7.47754	7.11875	7.6229	7.36943	7.9175	8.32684	7.7393	7.78431	7.32155	7.28956	7.52113	7.92947	7.60311	7.58009	7.26386	7.67876	7.45154	7.46947	7.25125	6.84232	8.26266	8.77761	8.98626	7.15075	7.17413	7.71814	7.78672	7.88664	7.78841	6.91149	7.12118
DCN	11.6659	11.3424	11.5435	12.0588	11.7042	11.5033	12.084	11.3457	11.9269	10.9774	11.3006	11.5244	11.5443	12.0105	11.2621	11.2053	11.371	11.0403	11.0662	12.2112	11.7493	12.138	11.9858	11.4234	11.5235	9.78206	10.1494	10.4129	10.89	11.8526	9.18363	10.1375	9.61284	10.1118	11.443	11.818
DDC	5.14188	5.10476	5.23868	5.24903	4.7643	6.11483	4.70039	4.88645	5.17304	3.835	4.35087	3.83788	3.55999	4.56323	6.91776	4.27743	3.99707	4.22921	3.8071	5.03406	4.81134	5.90748	4.68483	6.36553	5.0087	3.84453	3.97233	4.1731	4.14957	4.75006	3.92884	3.83302	3.92652	4.01539	4.9077	6.16378
DDO	5.21583	6.10084	5.89079	5.56317	5.36465	5.76644	5.73874	5.64961	6.2144	5.40848	4.83033	5.12215	5.09922	5.4611	6.10715	4.44655	4.40347	4.36425	4.44085	5.42468	5.20815	5.53005	5.52463	6.08206	5.31088	4.48207	4.59329	4.40796	4.541	5.93319	4.21948	4.23591	4.31278	4.03753	5.45569	6.0887
DDN	4.66848	4.99322	4.93582	4.99034	5.27515	5.12055	5.12267	5.10038	4.84768	5.76541	5.69087	5.81232	5.85615	5.03954	4.89952	5.69079	5.52434	5.59081	5.87088	5.10593	5.02087	5.14911	4.89404	5.29133	5.00553	6.15551	5.82866	5.97445	6.32896	5.08572	5.69934	5.7184	5.77466	5.79803	4.87609	5.11654
DEK	9.58964	9.39163	9.68279	9.68564	9.5092	9.28115	9.46112	9.67822	9.57832	10.8793	10.189	10.884	10.66	9.70702	9.45672	9.35755	9.44654	9.39797	9.41418	9.74163	9.4515	9.61785	9.77389	9.57268	9.56799	10.3569	10.0895	9.81413	10.0153	9.58436	10.5067	10.2495	10.3806	10.2693	9.52693	9.45209
DES	7.38522	7.6122	7.30569	7.9597	8.34425	7.55243	7.38773	7.08568	6.92504	5.27147	5.50855	4.98701	5.26534	7.56803	7.03815	5.42029	6.20786	5.52462	5.03749	7.40102	6.64673	6.90955	7.19406	7.33001	6.93177	5.12738	5.43871	5.36504	5.72108	6.88719	6.02571	6.19945	5.58266	5.34682	7.9495	7.55525
FPR1	8.2811	8.64524	7.20585	8.61752	9.35283	8.70202	7.89821	7.85694	7.92823	8.34101	8.81216	8.12677	8.0765	9.27527	8.97607	8.34552	9.23439	7.67866	8.09282	8.92682	8.6599	7.78642	7.69587	7.66493	7.93252	6.82799	7.25858	6.94585	6.87798	6.53627	7.61224	8.19096	7.73125	7.02599	8.6478	8.81371
FPR3	6.45371	6.71075	7.16483	6.30233	6.71535	7.11016	7.38745	8.00902	6.86023	7.12353	7.6913	7.18574	6.94551	7.57386	6.72369	6.38921	6.71831	6.05184	6.26344	5.98219	7.96644	6.97264	6.17202	7.45492	6.62166	6.7263	7.10634	6.98681	7.25775	6.3361	5.69331	6.61543	6.20687	5.91937	6.11014	7.16492
FPR2	5.14327	6.74885	4.38123	5.67607	6.26706	5.98754	5.64675	5.15032	4.99716	5.17162	5.55259	5.10653	4.81351	6.89901	5.61426	6.37048	6.58565	5.46543	5.7576	7.25239	5.10005	5.67407	5.42881	5.11224	4.70981	4.62725	4.688	4.21953	4.45767	4.27239	5.40941	5.6115	5.59452	5.11909	5.69069	6.07572
DLD	7.23343	6.98285	7.2602	7.22295	6.9933	7.07031	7.12374	7.13843	7.51234	8.35154	7.27222	8.04829	7.81168	7.06002	7.16538	6.94886	7.0623	6.90424	7.04795	7.30956	7.25859	7.23113	7.19325	7.26562	7.05668	7.18473	7.11254	6.97642	6.66352	6.92884	7.68424	7.57547	7.71989	7.41232	7.30286	7.04356
CCNDBP1	8.88056	9.17368	8.92738	9.00674	8.83622	8.99572	8.82856	9.02092	9.12002	8.20837	8.89722	8.30952	8.35848	8.83322	9.07429	9.20314	9.17206	9.33242	9.01977	9.04964	8.78496	9.00904	9.35062	9.03619	9.02328	8.26038	8.41847	8.60431	8.20404	8.87088	8.98139	8.77656	8.86564	8.6753	8.71619	8.86721
DMD	8.08822	8.01456	7.91953	7.31575	7.57323	7.22419	7.47392	7.61732	7.6867	7.18222	6.84053	6.94686	6.96887	7.25646	7.63041	5.72926	6.25033	5.62148	5.97031	7.21978	7.40808	7.07312	7.80262	7.43986	7.71385	5.86471	6.79219	7.0134	3.89325	7.31671	7.42243	7.58336	7.47242	7.75234	7.83192	7.39332
DPT	7.49388	7.83475	8.13284	8.27335	7.64127	6.90407	8.74249	7.71576	8.63803	7.08365	6.83337	8.4999	9.00922	8.07315	7.27936	8.04471	7.0329	7.76844	8.06655	8.01222	7.65862	8.5865	7.40918	7.27584	7.10812	6.15033	6.1477	6.64799	7.70829	7.49497	4.83872	5.27584	4.6393	5.29344	7.85046	7.80409
DR1	7.03524	7.27302	7.04945	6.97358	7.38581	7.26146	7.34226	7.45256	7.32225	7.6864	7.59836	7.75327	7.62701	7.20797	7.32896	8.04531	7.90972	8.22434	8.17019	7.08489	7.32162	7.26893	7.21662	7.31832	7.02026	8.06589	8.30755	8.49881	7.75896	6.93919	8.92701	8.75384	8.94285	8.71873	6.93187	7.1187
DSE	7.79848	8.14792	8.04153	8.45822	8.63358	8.11951	8.41467	8.54838	8.21871	9.29273	8.6923	9.08501	8.9847	8.84188	7.8895	9.85853	9.4584	9.76422	9.69249	8.47578	8.5668	8.13011	8.19204	8.01128	7.86742	7.91139	8.01531	8.19764	8.24842	8.01117	7.43742	8.04785	7.61055	8.63484	8.74876	8.02211
DSP	8.04124	7.70368	7.51277	7.66342	8.21476	7.48608	6.84991	7.56929	8.31922	11.5641	10.2615	11.5981	11.276	7.99887	7.94669	11.0829	10.6581	11.34	11.1435	7.69039	7.55093	7.72243	8.31908	7.90458	8.54316	11.4185	11.0446	10.7627	10.9981	7.94205	11.8465	11.7043	11.64	11.9737	7.72318	7.45037
DST	7.79585	6.20267	8.06872	8.00273	6.80126	6.7121	7.66677	6.72326	7.97264	8.48059	7.02078	8.44541	7.90012	7.34883	7.13737	8.43687	8.56232	8.79302	8.6668	8.20078	6.78219	7.74995	7.92478	7.52109	7.76118	7.26711	7.22264	7.02533	7.51512	8.24564	8.22452	8.54062	8.30479	8.70849	7.64782	7.78562
DTL	7.55282	5.90769	6.07179	3.17142	3.33087	3.46838	5.83697	4.31915	4.41031	7.71172	6.24139	7.43399	7.14319	6.14247	3.98762	6.30304	6.2311	6.21041	6.66417	4.22224	6.55528	4.54718	4.8499	3.97719	4.3771	8.19616	7.68852	7.50905	7.76035	6.55957	7.31114	7.05423	7.54983	6.45821	4.68738	4.08714
SLITRK4	3.27883	3.3236	3.15822	3.58628	3.07251	3.79729	3.65276	3.87958	3.78176	3.38806	2.65917	2.75326	2.84693	2.94431	3.08559	2.62127	3.14052	2.81809	2.78758	3.11027	3.2176	3.02398	3.28066	4.19736	2.9185	2.66098	2.77729	2.90455	2.68646	2.9852	4.43549	4.66391	5.51512	5.65821	3.529	3.32431
SLITRK6	4.63418	6.11949	6.41052	5.75173	3.22928	3.26645	5.72118	4.46304	5.47383	7.48604	5.00415	7.28669	6.55991	5.28469	4.8505	4.5703	5.21039	5.02353	4.76167	4.69316	3.78303	4.54682	6.0892	5.02468	5.57869	5.45755	4.65263	3.29282	6.05865	6.01989	8.28627	7.89645	8.17698	8.22935	5.24649	4.64638
SLITRK5	4.46327	4.33475	3.79579	4.47825	3.96934	3.64396	3.86659	3.86326	3.40348	3.82973	3.8873	3.85912	4.19472	3.95251	3.86158	4.06428	4.09572	3.83201	4.02743	3.85357	4.03304	3.44982	3.95289	3.57907	4.75301	4.6188	4.15916	4.39603	4.5309	4.95015	6.13784	5.62632	6.06243	5.64097	4.32174	3.75456
DUT	8.96497	9.18449	9.17667	9.16215	8.51946	9.03618	8.68059	8.3908	8.96494	9.38134	9.04964	9.28687	8.88605	8.82114	8.74498	8.92244	8.74872	8.95871	8.95804	8.88805	8.90751	9.0561	9.12811	8.68016	8.88599	9.15531	9.33701	9.40869	8.29861	8.87266	9.7504	9.55824	9.71713	9.56791	8.87152	8.69028
DXO	7.39186	7.58624	7.21587	7.24938	7.14095	7.61978	7.23578	7.31794	7.2357	7.22884	7.2977	7.45534	7.55418	7.26603	7.25558	7.04474	7.21441	7.17538	7.27035	7.26371	7.46635	7.20271	7.36461	7.17764	7.42187	7.41604	7.21848	6.79146	7.32516	7.39796	7.70822	7.34095	7.52223	7.49661	7.26793	7.32617
DYM	7.01527	6.80519	6.98193	7.04361	6.8377	6.78068	6.90166	6.90134	7.16797	7.47543	7.18718	7.38349	7.0723	7.1268	6.90211	6.74269	7.03168	6.77975	6.83673	7.07717	7.15204	6.92244	7.10754	7.04403	6.93733	7.45869	7.62006	7.9716	6.67075	7.01659	7.76265	7.65568	7.70391	7.7523	7.02141	6.93882
L3HYPDH	5.754	5.75758	6.09486	6.03759	4.59176	5.68049	6.30042	5.47351	6.33202	5.86443	5.85748	5.80312	5.5346	5.62216	5.80626	5.61262	5.62767	5.46035	5.69725	5.87927	6.07624	6.1347	6.12584	5.78669	5.53115	5.32518	5.45661	5.28521	5.29603	5.619	5.16323	5.04696	5.28785	5.18728	5.47113	5.60262
G2E3	5.37303	5.29757	5.30934	5.52456	5.02107	5.32282	5.37357	5.12813	5.61936	6.00877	5.46515	5.77684	5.71532	5.64534	5.52097	5.80202	5.81456	5.87447	6.1204	5.67458	5.43622	5.35557	5.51775	5.17765	5.3802	6.13967	6.2395	6.344	5.64403	5.31902	7.45551	6.69732	7.20468	7.06183	5.41365	5.15608
EBP	7.60164	8.3021	7.52252	7.6816	7.10889	7.9678	7.03161	7.96737	7.58124	8.47872	7.47116	8.11228	7.89353	7.38096	7.93025	7.98534	7.63047	8.48064	7.94012	7.63649	6.73459	7.70497	7.09309	7.92946	7.36828	9.30957	8.89376	8.81807	9.11993	7.56354	8.82856	8.45124	8.6833	8.4127	7.25254	7.73513
ECD	7.22346	7.61673	7.26663	7.14428	7.65173	7.65911	7.68413	7.43293	7.243	7.79715	7.43056	7.67485	7.46585	7.65632	7.34462	7.31035	7.34685	7.06463	7.18294	7.48123	7.69817	7.39246	7.28384	7.39659	7.45833	7.94447	7.71081	7.61073	7.81335	7.30938	7.89942	7.70585	7.81798	7.58334	7.73323	7.27667
EDA	5.27659	5.429	5.35825	5.59727	5.19255	5.39644	4.90015	5.41458	5.57299	5.44475	5.41101	5.78801	5.83537	5.532	5.28703	5.94553	5.49655	5.87424	5.67049	5.23564	4.68084	5.40498	5.6171	5.16949	5.63602	5.70877	5.66039	5.52378	5.76078	5.3939	5.96108	5.86034	5.79424	5.97877	5.28379	5.33604
EED	7.42132	7.77165	7.31126	7.53856	7.13118	7.29023	7.27796	7.39801	7.54239	8.70724	7.94014	8.70726	8.34643	7.64802	7.39676	8.0989	7.88939	8.12544	8.03779	7.47519	7.44847	7.50345	7.74757	7.27775	7.12661	9.33054	8.98381	8.86648	8.68432	7.55458	8.16915	7.70383	8.05465	7.57201	7.64651	7.18329
EFS	6.83235	6.68774	6.49121	6.71849	6.23064	6.66364	6.56841	6.28696	6.76628	8.03706	6.84899	7.7726	7.63057	6.2834	6.62426	6.94257	6.78949	7.40381	7.12318	6.58773	6.95827	6.74879	6.61123	6.22811	6.66931	7.89967	7.63304	7.56355	7.48401	6.94741	8.63414	8.4267	8.54795	8.51381	6.85233	6.32404
EGF	4.104	4.22431	3.84933	4.03718	4.85131	4.39445	3.71482	4.40506	3.33872	4.89211	4.0575	4.69213	4.51161	3.52384	4.05629	4.77954	4.83606	5.16605	5.2468	3.69893	4.10351	3.81268	3.43875	4.0512	3.65382	4.40708	4.88058	5.14923	3.65151	3.56601	3.57026	3.43747	3.50465	3.24837	3.83461	4.17269
EHF	5.87886	6.86482	6.42015	5.84945	6.22738	5.98039	4.98995	5.09254	5.32587	7.51532	6.72452	7.30653	6.00892	5.44164	6.34828	6.28182	6.62291	6.64506	6.04376	5.92361	5.43736	5.61122	5.10419	6.14153	5.69847	8.08412	8.27663	8.43358	6.0241	5.31344	7.15608	7.34172	7.52179	6.77977	5.51549	5.31653
ELL	5.44097	5.47699	5.14422	5.10949	6.38916	5.77452	5.59753	5.5393	5.27366	5.65832	5.84966	5.83661	6.06586	5.83678	5.30564	5.55546	5.81312	5.63368	5.68642	5.26913	5.66682	5.36432	5.32626	5.3232	5.43079	6.14439	6.12243	6.04503	6.28403	5.34052	5.61941	5.69871	5.61312	5.56077	5.68918	5.45328
ELN	9.24893	8.37989	8.38784	8.57598	8.95861	8.76056	11.0399	8.78527	8.67487	7.0958	8.82099	7.59016	8.5374	8.57389	8.49685	8.03369	8.65703	7.62704	8.00709	8.95915	9.43696	8.9879	9.13803	9.33165	9.24702	6.0022	7.27866	6.8428	7.7272	8.67149	6.59516	7.67645	6.46153	6.23819	8.43192	9.31985
EMB	7.76316	7.95081	7.80354	7.98796	8.4229	8.04872	7.91531	8.80455	7.59725	7.88664	9.4262	8.19066	8.70271	8.78469	8.26081	9.01573	9.41445	8.87622	9.06386	8.18206	8.71419	8.1156	7.9178	8.27213	7.96657	8.85852	8.67346	8.29456	8.92377	7.97424	6.41282	7.52299	6.96494	6.29424	7.94435	8.43631
ENG	7.93194	7.88148	8.26661	8.43696	8.20463	7.91191	8.94637	8.4431	8.30672	6.96445	7.63627	6.87858	7.08923	8.18492	8.40678	7.31085	7.76053	7.19786	7.33788	8.23212	7.92763	8.43655	8.74272	8.94158	8.43711	6.46488	6.7402	6.84199	6.93574	8.26366	6.43457	7.10133	6.73082	6.34002	8.00029	8.3591
F10	6.15016	6.25939	5.93192	5.99962	5.83588	5.78979	6.18021	5.93614	5.87418	4.94333	5.28826	5.01522	5.26704	6.02501	5.86906	5.29163	5.10591	5.20746	5.10116	6.07256	5.64455	6.21104	6.26552	5.72684	6.06986	4.89631	4.97698	5.21811	5.23497	5.89364	5.09155	5.07834	4.82541	4.87757	6.08164	5.75303
F12	5.2668	5.54493	5.09597	5.2722	5.58819	5.68065	5.18145	5.70762	5.34966	7.03314	5.78085	6.47625	6.45148	5.15064	5.16391	6.71818	6.30076	6.9307	7.02348	4.73184	5.63205	5.09125	5.03	5.49859	4.97384	7.95427	7.94045	8.21753	7.32218	5.29259	6.88789	7.01671	7.22348	7.08541	5.86818	5.83037
F2R	5.65542	5.74763	5.79204	6.33132	6.19752	5.61437	6.56875	5.71263	6.0828	6.16926	5.84931	6.03898	5.90767	5.82332	5.87787	6.02227	5.91467	6.21091	6.0873	6.04051	6.08689	6.44517	5.73582	5.39878	5.52755	5.17852	5.56401	5.45523	5.35652	5.80235	5.71386	5.63804	5.64595	6.23619	5.14136	5.83881
ERF	6.61449	5.5859	5.5757	5.50926	6.06548	5.72936	6.99605	5.80595	5.82119	5.98764	6.29834	6.18539	6.41647	6.10646	5.9852	6.37164	6.25719	6.3607	6.43984	6.16877	6.09886	5.69192	5.73197	5.72887	6.12368	6.91654	6.64359	6.75224	7.0518	5.78694	6.48188	6.50733	6.39265	6.5846	6.40608	5.90385
ERH	9.62845	10.3461	9.95947	9.76272	9.47359	9.62348	9.87665	9.74429	9.91231	10.7725	10.1015	10.5949	10.2887	9.73531	9.74648	10.0133	9.96719	10.1058	10.0756	9.89006	9.89585	9.87489	9.47879	9.76801	9.68882	10.3379	10.3689	10.2361	10.1065	9.70012	10.1483	10.0465	10.2197	9.97214	9.68518	9.67454
ERG	6.80397	5.80038	7.04832	7.15639	6.55722	5.88135	7.47731	5.78835	6.74307	5.12934	5.22138	5.22556	5.0871	6.69991	6.087	5.10062	5.29845	4.88661	5.28676	6.83001	6.34557	6.59763	6.95804	6.3458	6.55464	4.24542	4.58565	4.4682	4.19562	5.98844	5.03963	5.17235	5.03758	4.93368	5.98879	6.08953
ESD	8.87327	9.27145	9.07856	8.98491	8.58186	8.92416	8.68266	9.1717	8.98442	9.18082	9.15382	8.93883	8.98206	8.8914	8.85219	8.47442	8.61087	8.41113	8.40535	9.11197	9.00499	9.12967	9.04607	9.0744	8.84666	9.04387	8.98766	8.5543	8.96734	8.95317	8.47804	8.6625	8.57703	8.58336	8.90241	8.92311
NDUFS5 /// RPL10	10.1294	10.6811	10.2212	10.0805	9.98863	10.1615	10.2247	10.0511	10.4505	10.6231	10.3303	10.5659	10.2978	10.2384	10.1058	10.6318	10.4241	10.4746	10.5923	9.96764	10.2964	10.3009	9.61826	10.0533	9.96399	10.7405	10.7656	10.9818	10.5634	10.333	11.3059	11.075	11.2463	11.2103	10.4649	10.0934
EVC	6.60426	6.24856	6.61871	6.38671	6.35265	6.56353	6.57275	6.38281	6.52346	6.3134	6.15984	6.67383	6.70341	6.15633	6.30856	6.65621	6.2216	6.70188	6.50165	6.42584	6.32994	6.4611	6.588	6.19194	6.52647	5.77111	5.77262	5.68656	6.01502	6.614	5.47417	5.80695	5.595	6.03003	6.38764	6.51298
EVL	7.93515	7.95205	8.33862	8.1352	7.77924	8.34288	8.21216	8.38302	8.59158	7.87042	8.14371	7.80507	8.32144	8.06802	8.2826	7.65624	7.86667	7.37848	7.59409	8.0833	8.05124	8.10602	8.25639	8.97264	8.63036	7.31882	7.41584	7.3024	7.49103	8.543	6.69937	6.76759	6.74685	6.91371	7.78849	8.50711
EZR	8.6596	9.0722	8.96626	8.68653	9.22366	8.86768	9.04482	8.00199	8.66284	8.24832	8.338	8.16596	7.24665	9.55963	8.95398	8.39423	8.23886	8.53108	8.38753	8.94294	7.92776	8.73795	8.47112	8.30463	9.16516	7.98154	8.15659	8.3665	7.30917	8.57186	9.48109	8.8978	9.04097	9.09699	9.20575	8.73905
RBM14-RBM4 /// RBM4	7.5431	7.50563	7.54711	7.37106	7.45612	7.43677	7.61242	7.14488	7.334	7.33006	7.23429	7.59117	7.4737	7.41291	7.29684	7.63266	7.41799	7.78941	7.54894	7.4889	7.41714	7.34555	7.3417	7.13327	7.3428	7.57582	7.5641	7.72438	7.33203	7.43633	7.88432	7.68126	7.8294	7.71566	7.64257	7.33236
FAH	6.81683	7.40115	6.43428	6.63989	6.56263	6.91724	6.38376	6.75471	6.85861	7.36575	6.95976	6.91996	6.69777	6.88534	7.33357	7.84032	7.32393	7.87428	7.87515	6.9212	7.25203	7.19214	6.54162	7.04071	6.66112	6.57254	6.66579	6.69144	6.58515	6.80647	7.44531	7.13118	7.31199	7.12344	6.8295	6.63017
FAP	5.98114	5.09618	5.55808	5.34952	6.69506	5.27918	6.52814	5.56618	5.86218	8.05173	7.86921	8.39099	8.59589	5.91178	4.74146	9.42456	8.7897	9.04714	8.92547	5.90553	7.43718	6.04338	4.71896	5.0602	4.98109	6.29031	6.73446	6.97449	7.89386	5.63651	5.90365	6.68484	6.51247	7.31334	5.83309	5.73709
FAS	7.18161	6.61078	6.52013	7.3916	8.44241	7.41281	7.52668	6.98793	7.5907	6.78586	7.21317	6.79265	6.5825	7.78427	7.37733	6.48257	7.03467	5.92582	6.53795	7.50932	7.59112	7.02963	7.37099	7.37874	7.33777	7.2415	7.29539	7.20873	6.58577	7.21324	5.01573	5.78674	5.59299	4.8462	7.80703	7.26708
FAU	11.9335	12.0403	11.7795	11.69	11.656	11.8942	11.7496	11.8784	11.8924	11.942	11.8646	11.8433	11.7919	11.6687	11.784	11.8896	11.8272	11.8451	11.8666	11.7089	11.7195	11.8252	11.8225	11.701	11.7868	11.444	11.6365	11.7704	11.3687	11.8432	11.8104	11.6689	11.7939	11.7269	11.8336	11.7799
FBL	9.57406	9.80796	9.51599	9.41774	9.44289	9.52476	9.3885	9.44397	9.45442	10.6795	10.4426	11.4074	11.0875	9.52849	9.21126	9.86361	9.81526	9.80155	9.84836	9.56182	9.76931	9.44259	9.39493	9.23135	9.30312	11.4613	10.965	10.9118	11.4497	9.65329	10.9386	10.7114	10.9475	10.9538	9.53954	9.3395
TGFB2	5.82435	5.13526	6.26938	6.14384	5.33478	5.00704	6.57273	4.7119	6.47899	3.915	4.70902	4.37673	3.88549	5.77863	5.85879	4.7308	4.27469	4.04662	4.16775	6.00582	5.19255	5.77339	6.64875	5.91687	5.98389	3.81446	3.74201	3.8589	4.01835	5.29129	3.95461	4.10376	3.77483	4.35016	4.71534	5.53457
TGFB1	8.22793	8.66785	8.25465	8.34215	8.26918	8.36147	9.67248	9.60719	8.14694	8.83963	9.08531	8.27009	9.44674	8.89162	8.90094	9.74949	9.40632	9.71655	9.27194	8.39963	8.44835	8.60419	8.76664	9.77054	8.89613	8.62818	8.62589	8.52317	8.66979	8.18636	8.35822	8.59706	8.33139	8.95424	8.46891	9.00723
TGFB3	7.09329	6.81259	6.67516	6.40292	7.19037	6.90436	7.41876	6.74092	6.44933	7.04848	7.31948	7.6213	7.67413	6.95179	6.1493	7.97764	7.41595	7.26385	7.46875	6.45194	7.80604	6.54981	6.0583	6.14229	6.34528	6.57072	6.7254	7.09706	6.99174	6.55983	5.83724	6.39716	5.9756	6.41703	7.24986	6.87821
FER	5.8678	5.54856	5.88806	6.0604	6.22915	5.77752	6.04259	5.64433	5.70256	5.75425	5.84322	5.72625	5.60021	6.12215	5.9236	5.52372	5.7007	5.93873	5.86739	6.02433	5.80544	6.01164	6.07456	5.79523	5.7667	7.03244	7.51507	7.79987	5.30589	5.89662	5.60657	5.80803	5.59639	5.88134	5.78573	5.82246
FES	7.00672	6.53561	6.57184	6.79233	7.47239	6.64493	7.21296	6.66974	6.46532	5.84871	6.18199	5.93295	6.13537	6.80656	6.63343	6.41932	6.84919	6.11216	6.42322	6.58911	6.91773	6.7409	6.62264	6.86564	6.54662	4.9836	5.50263	5.45516	5.81853	6.65544	5.45335	5.81028	5.55682	5.29459	7.1807	6.91195
TGFBI	9.74303	10.6405	10.6195	10.1611	10.4297	10.288	10.1797	10.9099	10.4312	11.0956	10.635	11.1669	11.1062	10.8955	10.1413	12.4515	11.798	12.2441	12.1825	10.013	10.5669	10.2662	10.1643	10.7251	9.85176	9.10768	9.19032	9.18051	9.68094	10.1028	9.63687	10.4163	10.1392	10.7151	10.0128	10.8186
FGB	3.50034	3.66221	3.35581	3.4986	3.59691	3.55146	3.49232	3.688	3.53607	3.70563	3.71531	3.69832	3.80233	3.5703	3.41768	3.81379	3.75602	3.88889	3.74184	3.2448	3.50641	3.2921	3.35511	3.63101	3.45965	3.84368	3.88213	3.91481	4.06388	3.60373	3.83415	3.79656	3.75414	3.75097	3.39895	3.46154
FGA	4.69256	3.56078	3.26224	4.05759	4.6548	4.81682	4.64687	3.91261	3.57668	3.91422	5.24062	3.30492	3.47774	3.64467	4.90541	3.68942	4.27221	3.42992	3.70746	3.75872	5.66594	3.99064	3.39951	4.40663	4.20232	3.79554	3.38595	3.58352	3.71784	5.74195	3.61764	4.06714	3.67544	3.5755	5.19353	4.02699
FGG	8.64839	5.31296	4.41906	9.43726	8.89539	10.3381	9.63884	7.81598	7.98482	7.83156	10.7883	2.89791	3.1258	6.81807	9.37614	5.22391	8.40308	4.31455	7.15161	8.82765	10.0936	8.7663	3.13334	10.6197	9.2859	3.05027	3.03813	2.68983	2.9197	10.8702	6.54706	7.05675	6.5183	4.79005	9.94064	8.60688
FGR	8.67614	8.93712	8.72645	9.60247	9.70835	9.81015	8.89049	10.0307	8.86498	7.92983	8.33427	7.26906	7.53311	9.47905	9.77535	8.5028	8.98595	7.47358	8.20876	9.47312	8.81738	8.95972	8.93793	10.2725	9.38713	6.87754	7.21963	7.17947	7.3358	8.75375	6.93934	7.71399	7.26316	6.80703	9.15426	9.47093
FRS2	6.34998	6.09156	6.20582	6.10144	6.13831	6.0807	6.05051	5.99529	6.11107	5.77469	6.00933	6.28452	6.37413	5.82487	5.92741	5.88133	5.8587	5.8626	5.82487	6.25793	6.01321	6.28707	6.10974	5.89602	5.98248	5.90461	5.73123	5.17111	5.44449	5.99683	5.60919	5.54629	5.46554	5.75786	6.02917	5.79501
FRS3	6.06043	6.00561	5.90466	5.99908	5.2722	5.86201	5.65002	5.90536	6.07589	5.90537	5.73679	5.95653	5.95651	5.72574	6.0183	6.20139	6.13255	6.28184	6.08499	5.97699	6.06125	6.1314	6.27098	5.73253	5.9766	5.99224	5.90365	5.93128	6.11961	6.14312	6.68525	6.24048	6.289	6.59071	5.49619	5.85131
FN1	11.8951	12.2466	12.714	12.6475	12.2563	12.4027	12.4684	12.6702	12.4839	12.4685	12.0553	12.3671	12.4114	12.8195	12.4313	12.5316	12.4144	12.3586	12.4359	12.3805	12.3402	12.3933	12.6438	12.5303	12.4607	10.932	11.4303	11.3387	12.2017	12.5241	10.8668	11.4465	10.997	12.1416	12.2532	12.4003
FOS	12.4941	11.0278	9.09542	12.1636	11.4593	11.8265	12.4772	11.6319	12.1818	8.22677	9.9306	8.17502	7.39163	10.8326	12.6197	11.4523	11.6239	11.4488	11.3085	12.6435	11.9666	12.8601	11.8439	11.0848	12.8618	8.57424	9.3335	8.23446	8.3178	12.8734	9.99025	10.579	10.2667	10.0968	11.65	11.5261
FRZB	8.02867	6.81728	6.64012	7.00657	7.96295	7.2942	8.84065	7.17272	7.65334	5.83189	8.02872	5.82526	6.16615	7.3787	7.08824	6.10522	6.49787	5.95256	6.09164	6.83902	8.54045	7.46817	6.65196	7.41445	6.9486	5.51714	5.82236	5.47967	5.4196	7.54229	5.66013	6.72223	6.0117	5.52174	7.3084	7.86473
FRYL	8.30045	7.23979	8.20055	8.42662	7.526	7.65956	8.05763	7.49548	8.06873	6.82176	7.08618	7.01314	6.82543	8.24221	8.02797	7.52821	7.35718	7.45044	7.45303	8.73345	7.67302	8.15252	8.67572	8.04207	8.13029	7.54567	7.37657	7.13255	7.39295	8.21479	7.08665	7.04971	7.15748	7.05494	8.18461	7.5261
FRK	3.34534	3.71593	3.4061	3.12546	4.89528	3.5176	3.15876	3.3221	3.17018	4.89918	4.22272	4.99822	4.65487	3.21056	3.21394	4.75769	4.60817	5.02325	4.48031	2.76126	3.68151	3.17693	3.104	3.12326	3.29936	5.31949	5.71671	6.20251	3.80376	2.88713	6.39619	5.92911	6.02902	6.10271	3.2219	3.26643
FRY	6.55717	6.60933	7.09279	7.44806	6.11202	6.64994	7.22141	6.18769	7.13846	4.74311	5.86796	3.93271	3.97271	7.37282	6.56742	4.24958	4.49671	3.87837	4.25384	7.45514	6.2774	7.13115	7.54597	6.4485	7.33038	3.72187	3.7678	4.18829	3.82637	6.21844	4.67005	4.67877	4.42803	4.10294	5.85631	6.29186
FST	4.83676	4.27088	4.33674	5.21062	5.65091	5.0401	5.68849	4.58574	5.12773	7.00189	5.31365	7.10154	7.08094	5.75725	4.40346	8.16414	7.19589	8.49506	8.17298	5.51227	5.23639	5.22644	5.63379	4.03422	5.15306	8.21143	8.97634	9.71052	5.71384	4.47328	7.74368	8.11426	8.03077	8.33713	6.24168	4.99371
FTL	12.995	12.9661	12.8824	13.0437	12.9845	13.0899	13.1571	13.1459	13.155	12.7997	13.0241	12.7101	12.6987	13.0816	13.1473	12.8738	12.8652	12.9601	12.9297	12.9652	13.2205	13.1746	12.9035	13.2515	13.0313	12.5885	12.7324	12.7713	12.7285	13.0031	12.5509	12.9344	12.7704	12.4935	13.002	13.1357
FTO	8.98241	9.30649	9.30549	8.91909	8.72614	8.81444	8.97823	9.14562	9.02541	8.9209	9.06608	9.12288	9.27023	9.15478	8.87371	8.79139	8.85986	8.87832	8.81917	8.88343	9.08041	8.90277	9.10307	8.93159	9.08222	8.35951	8.30687	8.13951	8.75202	9.00468	8.04843	8.30042	8.20044	8.27578	8.88332	9.02295
FUK	7.20501	7.20789	7.28821	7.21217	6.82151	7.16628	6.8001	7.11417	7.09547	6.80512	6.82433	6.79334	6.8936	6.83768	7.08423	6.84335	6.85849	6.77858	6.99287	6.88801	7.00379	7.09947	7.11113	7.03327	7.08131	6.90837	6.82946	6.79464	7.0472	7.19	6.97046	6.70615	6.92971	6.7443	7.01757	7.13396
FUS	8.64568	8.27504	8.45471	8.09599	8.36396	7.95599	8.68962	8.03174	8.62862	8.73992	8.46195	8.70309	8.32417	8.53156	8.27263	8.06726	8.13481	8.24881	8.23939	8.69562	8.41615	8.65524	8.07874	8.26858	8.46035	9.30359	9.0641	8.99969	9.19686	8.55117	9.19675	8.97502	9.34035	9.05253	8.56147	8.31634
FUZ	5.88325	6.48091	6.23593	5.93275	5.94586	6.06087	5.88409	6.14976	5.82312	5.89836	6.42452	6.28019	6.26483	5.86495	6.1105	5.94299	6.12202	6.24506	5.78676	5.72723	6.02469	6.09425	6.01873	6.26369	6.14015	6.23201	6.31348	6.17586	6.53629	5.87315	6.58376	6.55531	6.58821	6.47216	6.08588	6.36571
FXN	5.95175	6.48865	6.03121	5.8232	5.52732	6.17344	6.05038	6.33671	6.23723	6.68256	6.37901	6.31437	6.15393	5.84138	6.08212	5.90736	6.21934	5.90587	6.22964	6.13197	6.74268	6.25969	5.59289	6.12019	5.94772	7.40616	7.57017	7.60818	6.9334	5.8448	7.13238	6.87437	7.20339	6.95507	6.21639	5.71966
FYB	6.6133	5.98172	6.27504	6.68441	6.74535	6.89258	6.9132	6.86608	6.47532	7.51914	8.11697	7.56929	7.50348	7.36559	6.76829	7.68666	7.77279	6.62887	7.32496	6.28714	7.86412	6.7698	6.4644	6.56747	6.28721	6.90577	7.50264	7.21352	7.2334	6.80157	5.47135	6.61641	6.0065	5.02414	6.771	6.71691
FYN	8.74264	8.39852	8.7238	9.26713	9.00284	8.50604	9.21462	8.1298	8.76682	8.06032	8.87486	8.43314	8.43899	8.73263	8.68809	8.44592	8.59462	8.17569	8.28065	9.21587	8.95162	8.90936	9.28635	8.69228	8.71605	7.43281	7.85476	7.8651	7.02695	8.67876	6.51763	6.98143	6.59848	6.91193	8.70463	8.42404
GAA	8.47974	8.77667	9.02593	8.66111	8.5807	8.70895	8.85076	9.37487	8.87184	8.00027	8.55948	8.0105	8.6558	8.54075	9.22736	8.48698	8.25751	8.57197	8.22471	8.3555	8.53395	8.77699	8.47072	9.55876	8.89194	8.63351	8.63746	8.63442	8.49394	8.75318	8.27653	8.52731	8.39399	8.60587	8.642	9.27348
GAK	8.74229	8.55541	8.66701	8.6548	8.8511	8.85205	8.41245	8.7094	8.57755	7.98922	8.29881	7.81997	8.10653	8.54434	8.72417	8.63287	8.49177	8.48239	8.51998	8.42239	8.58588	8.6275	8.65547	8.8139	8.71264	8.48015	8.48042	8.65402	8.20342	8.70405	7.95276	7.94796	7.97008	7.68386	8.63286	8.78079
GAL	3.72544	3.87678	3.58059	3.46202	4.026	3.85954	3.60545	3.87392	3.78772	5.96459	4.73337	5.743	5.31789	3.87189	3.50733	4.63618	4.32175	4.54791	4.67466	3.64022	4.40499	3.52673	3.76671	3.64849	3.48656	9.6679	8.60124	7.20228	9.06728	3.89346	4.33196	4.10176	4.23058	4.43943	3.581	3.79229
GCA	7.6625	7.84749	7.582	7.88148	8.31676	7.92975	7.12727	7.86826	7.81774	7.24468	7.82395	7.02088	6.88916	7.64034	8.00756	8.10192	8.55334	7.95534	7.85484	8.12452	7.68428	7.70625	7.69442	8.09948	7.35963	7.06645	7.3973	7.40775	6.46153	7.28341	7.22896	7.59005	7.40439	6.92225	7.94868	7.70699
GDA	3.21642	4.4467	3.17398	3.28511	3.73987	3.41777	3.34724	3.54863	3.54012	6.84266	5.35012	7.43827	7.35482	3.10536	3.2604	3.83818	5.3911	4.46867	4.25508	3.33353	3.96795	3.57644	3.32159	3.33503	3.4557	7.80044	6.08266	6.23793	7.90147	3.9903	8.253	8.12585	8.37793	8.12902	3.67195	3.86165
GEM	9.99233	7.51334	8.21988	9.19524	10.4931	10.1296	10.1086	8.16329	9.12076	8.32998	9.53712	9.24303	9.30907	9.5934	10.1794	9.74997	9.99408	9.75355	9.68307	9.50827	9.94868	9.93051	8.96027	7.41171	9.50712	7.02501	7.38168	6.93395	7.21612	8.52851	7.89126	8.75317	8.09609	9.05317	10.1702	8.69337
GGH	6.65581	6.87119	7.10152	6.81817	6.10293	6.06868	6.53291	6.88032	6.31645	9.20641	8.12996	9.21601	9.18998	6.65835	6.44529	8.68147	8.16364	8.8465	8.57219	6.38424	6.7329	6.00928	6.66881	6.05876	6.48393	9.25014	9.08311	8.88945	8.8101	6.23005	9.81715	9.67043	9.98111	9.67521	6.40418	6.13052
GHR	7.06695	6.4865	6.83109	7.02369	6.85838	6.24335	7.33603	6.21936	7.26665	5.57796	6.02798	6.00651	7.01596	6.60245	6.50643	4.39721	4.82339	5.2465	5.06194	7.07592	6.71199	6.74631	7.69542	6.33429	6.80036	3.78454	3.84118	3.07393	4.4223	7.17184	8.89588	8.86333	9.0337	8.96668	7.16115	6.54154
TGIF1	6.27943	5.10988	5.41074	4.85232	6.8253	5.3201	6.44731	4.9127	5.83105	5.24027	5.47033	5.41453	5.32124	5.44451	6.15546	5.04026	5.37389	6.03446	5.79705	5.39404	6.10274	5.91083	5.08848	5.7036	6.61717	5.71866	5.55075	5.69622	6.02162	6.13732	5.33487	5.2353	5.43151	5.45414	5.79465	5.69428
GK5	5.72465	5.66636	6.14158	6.00883	5.01029	4.80554	5.33968	5.59612	5.80317	5.56229	4.88106	5.03149	4.9199	5.54419	5.61245	5.51269	5.61885	5.92369	5.86054	6.12534	5.18041	5.7711	5.93104	5.54077	5.87442	5.01283	4.98859	4.4852	4.76804	5.7405	6.61643	6.53842	6.42945	6.65493	5.52799	5.50941
GLA	8.34006	8.10107	7.77979	7.68271	8.63102	8.53496	8.25662	8.32365	8.07006	8.11244	8.2145	8.06257	7.8882	8.58776	8.38358	7.83511	7.8437	7.58901	7.93433	7.49978	8.71752	7.76059	7.81335	8.35769	7.66495	8.49046	8.55229	8.68364	8.36462	8.02333	8.43092	8.31137	8.4226	7.8776	8.46231	8.16737
GLS	7.69593	6.84018	8.17724	7.9492	8.46532	8.30647	7.84057	7.79993	7.64292	6.69116	7.59449	7.19499	6.27013	8.04701	7.98462	7.15799	7.15758	7.03378	7.39947	8.09573	7.34026	8.06564	7.77706	7.85962	7.89019	6.24097	6.49684	6.04294	6.09662	7.42035	6.03964	5.99469	5.84915	6.36575	7.66456	7.72648
GNE	7.31721	7.34066	6.88495	6.86504	7.27127	7.23458	7.31753	7.16935	7.05136	6.29544	6.52858	6.78806	7.3148	6.83151	7.27249	6.48407	7.04603	6.37165	6.55504	7.41367	6.93571	7.11982	7.10756	6.87295	7.16814	6.81766	6.62901	6.32666	7.3691	7.0269	8.60908	8.18016	8.65685	7.57057	7.49912	7.21279
GNS	8.28351	8.34897	8.68752	8.902	8.34476	8.71458	9.04137	8.86024	8.92619	8.63049	9.02381	8.6373	8.42393	8.86392	8.73351	8.92966	8.69502	9.24388	8.91284	8.76946	9.45935	8.93028	8.80632	9.24533	8.56182	8.62409	8.76308	8.77135	8.5655	8.69948	8.39025	8.69604	8.5302	8.4786	8.52584	8.65773
GP2	4.40304	4.20152	3.96687	4.21391	4.34106	4.49677	3.97511	4.3441	4.28336	4.30079	4.27545	4.37773	4.26792	4.43721	4.52411	4.35308	4.41269	4.31477	4.43788	4.15527	4.26901	4.25022	4.21137	4.40165	4.48736	4.34689	4.36938	4.46044	4.53276	4.29017	4.44443	4.43414	4.37532	4.43194	4.38699	4.07218
GP9	5.7009	5.88809	5.30645	5.57429	5.69739	5.87003	5.39042	5.5063	5.34794	5.41245	5.59333	5.58722	5.7057	5.72603	5.67963	5.4617	5.74574	5.82804	5.6241	5.27084	5.3515	5.49795	5.61225	5.50619	5.47355	5.76048	5.74428	5.84889	6.03911	5.6099	5.5438	5.69385	5.50126	5.60099	5.55497	5.52016
GPI	9.12354	9.63915	9.2633	9.27346	9.2274	9.54398	9.60013	9.5431	9.34566	10.5049	10.3813	10.882	10.723	9.68749	9.52022	10.8276	10.3918	10.91	10.7338	9.2917	9.91031	9.4965	8.98493	9.80561	9.30975	11.8028	11.3324	11.2437	11.7432	9.48105	10.9764	11.2128	11.2421	11.4678	9.41156	9.50222
GPT	5.7072	5.85077	5.70798	5.39271	5.64834	5.62626	5.53835	5.86624	5.52516	5.60128	5.6759	5.57211	5.67241	5.62018	5.55567	5.89014	5.98956	5.72756	5.82466	5.43092	5.64604	5.54469	5.44519	5.76733	5.54848	5.59906	5.709	5.68954	6.03961	5.52875	5.91245	5.68747	5.66097	5.70422	5.6524	5.53112
GRN	10.5168	11.263	11.2438	10.9702	10.6166	11.3619	11.1222	11.6544	11.1215	10.8745	11.0291	10.5737	10.6863	11.1736	11.2789	11.231	11.0125	11.3746	11.088	10.7665	10.9816	11.0143	10.817	11.969	11.0856	10.5615	10.6037	10.61	10.7902	10.8841	10.3742	10.4474	10.2512	10.0573	10.7942	11.4958
GRP	4.28087	5.91907	6.40128	4.3641	5.23331	5.3232	5.35683	6.06859	4.99639	4.18501	5.00268	5.39585	5.19613	4.54713	5.12087	4.79513	4.72019	5.50936	4.99641	4.45388	5.21132	3.8907	5.45959	5.4301	5.71512	4.30699	4.03501	4.57821	4.28038	5.66806	4.43966	4.72696	4.4942	4.60772	6.0789	5.72032
GSN	8.41777	8.85363	9.22742	9.21696	8.61299	8.25777	9.25081	8.84044	9.09134	8.0042	8.1165	8.0081	7.7742	8.974	8.55931	7.72212	7.90668	7.71028	7.65168	8.91213	8.48457	9.11393	8.647	8.99219	8.73131	7.39056	7.51624	7.63274	7.65303	8.69974	7.64337	7.80281	7.73213	7.85704	8.45508	8.93412
GSS	7.58191	8.03601	7.62924	7.69167	7.61674	7.95802	7.70439	7.92976	7.72566	9.10704	8.20651	8.63898	8.51696	7.71441	7.71882	8.39387	8.16125	8.3135	8.49306	7.54973	7.9555	7.70525	7.55416	7.92521	7.71052	8.32608	8.24865	8.20489	8.13739	7.72014	9.15162	8.94784	9.19039	8.76978	7.6158	7.77464
GSR	6.31133	6.79838	6.47789	6.31116	6.53859	6.94649	6.3711	6.53796	6.48425	7.44143	6.9971	6.83225	6.83133	6.3224	6.86103	7.78585	7.65661	8.36093	8.06915	6.08591	6.61488	6.58131	6.08173	6.98839	6.38832	6.83434	6.98394	6.88754	6.92652	6.42897	8.26561	7.93625	8.26207	7.63949	6.3794	6.43062
FTCD	4.92807	4.87578	4.93814	5.10559	5.07544	4.99579	5.09132	5.1591	5.0358	5.41576	5.38235	5.32552	5.54998	4.93722	5.17242	5.64329	5.57331	5.75958	5.4183	4.92083	5.25112	5.08327	4.96716	4.96834	4.99045	5.58677	5.58395	5.70982	5.81203	4.91906	5.43189	5.31305	5.45509	5.4151	5.03999	4.96132
FTH1	11.3879	11.7596	11.7859	11.3615	11.5672	11.79	11.5293	11.8365	11.7445	11.1557	11.0806	11.0487	11.0959	11.7103	11.5512	11.0644	11.1353	11.1333	11.0569	11.3631	11.4497	11.6226	11.4851	11.8171	11.5233	10.4242	10.8037	10.8722	10.6208	11.5656	10.4277	10.701	10.4633	10.6365	11.6272	11.7991
TYMSOS	4.41853	4.62869	4.19003	3.97441	4.15205	4.37706	4.12795	4.40425	4.12567	5.08591	4.54217	4.95687	4.79829	4.06632	4.49839	4.62079	4.39574	4.73547	4.24592	3.96479	4.03199	4.05969	4.10879	3.95575	4.07813	5.99566	5.99921	5.65369	5.94293	4.20502	5.6558	5.31749	5.40719	5.47698	4.14881	4.24386
HAL	5.39881	4.47201	4.34225	5.1884	5.94833	5.1799	4.7614	4.6106	4.60083	3.96181	4.04568	3.99729	3.90483	4.87051	4.83199	4.22497	4.45286	3.88219	4.16579	5.33448	4.27514	4.85563	4.57704	4.53176	4.67306	4.18891	3.79652	4.02341	4.04781	4.38599	4.46408	4.51362	4.38297	3.94537	5.3704	4.72412
HBB	12.3177	10.6222	12.0833	12.7635	11.4464	12.3376	11.9643	11.725	11.1347	8.57534	10.571	8.07169	9.89763	11.9481	12.5202	11.0675	9.77294	8.59848	8.92358	12.4548	8.74871	12.3355	11.2863	10.2677	12.1821	8.3175	8.68987	7.5162	9.2619	12.7075	7.32506	8.33935	7.85487	6.5021	11.2219	11.8548
HCK	8.18578	9.30261	8.97082	9.04178	8.8787	9.06001	8.94178	9.39435	9.09499	8.58912	8.76702	8.50129	8.48082	9.27996	8.8848	9.24735	9.26455	8.67427	8.81806	8.69839	8.80736	8.63858	8.38555	9.87573	8.62151	8.10965	8.28015	8.24801	8.4469	8.65202	7.04252	7.74386	7.4892	6.99422	8.76016	9.28332
HDC	6.31956	7.19811	6.80312	5.4231	8.41755	7.16598	6.79721	7.16607	7.18105	5.7127	6.10083	5.87193	6.31767	7.22087	5.89609	5.51973	5.61574	5.27072	5.49485	6.64086	6.88131	7.36289	5.85033	6.0408	7.64025	5.19265	5.35077	5.42884	5.72444	8.42843	5.29482	5.71794	5.35054	5.47279	7.4136	6.69204
HFE	5.07646	5.40826	5.06291	5.29629	5.11671	5.21461	5.41974	5.48495	5.47864	5.60049	5.70529	5.77227	5.56436	5.23841	5.32051	5.65193	5.52154	5.74515	5.7705	5.18476	5.41518	5.29996	5.25007	5.51972	5.11188	5.86736	5.76991	5.63156	5.9952	5.17008	5.53944	5.55592	5.41705	5.39481	5.03369	5.42815
HGD	3.70218	3.86173	3.66439	3.7559	4.04685	3.88953	3.68674	3.87085	3.88182	3.74952	3.89218	3.82041	3.86	3.71853	4.43277	4.08376	4.01878	3.96735	3.88062	3.81624	4.25553	3.71282	3.78853	4.01793	3.82889	4.02527	4.12637	3.99825	4.30999	3.80818	3.90934	3.87661	3.79625	3.89196	4.16667	4.11765
HGF	5.40925	4.99146	4.72303	4.81798	6.08246	4.98289	6.02397	5.09417	5.05279	4.90421	5.59232	4.84811	4.85505	5.85859	4.7847	4.32502	4.68197	4.1058	4.36446	4.3817	5.96541	5.17279	4.8839	4.7743	4.80941	4.20762	4.40513	4.50963	4.44652	5.03435	4.41838	4.93039	4.4876	4.37535	5.31062	5.20961
HGS	8.50751	8.44419	8.35274	8.38652	8.53041	8.35187	8.75283	8.70753	8.26478	8.67436	8.35235	8.27133	8.77413	8.29418	8.52992	8.78671	8.61632	8.63563	8.66493	8.49763	8.05325	8.40334	8.4497	8.94897	8.78121	8.63013	8.61252	8.57182	8.50369	8.15781	9.14851	9.01708	9.10062	9.12589	8.05737	8.51435
HK2	7.31624	7.55826	7.63821	7.54322	7.48143	8.68898	7.36836	8.43867	7.56581	8.38076	8.0667	8.20733	8.13806	7.28498	8.3445	8.92705	7.93453	9.50044	8.79087	7.46831	7.80783	8.03096	7.10111	8.62841	7.83662	8.15258	7.81232	8.03215	8.09482	7.17564	10.2154	10.2474	10.1278	10.7377	7.41291	7.95239
HK1	9.22151	9.56227	9.5688	9.34812	9.58623	9.44002	9.66982	9.71505	9.42925	9.71371	9.60857	9.64977	9.56692	9.54283	9.51052	9.77659	9.66495	9.82361	9.72132	9.26265	9.46874	9.37804	9.37048	9.6732	9.53556	9.99657	9.99747	10.2821	9.77316	9.19563	9.64672	9.73016	9.74788	9.73483	9.32865	9.51148
HK3	7.27167	8.42139	7.71598	7.77245	8.4224	8.57794	7.48989	8.92963	7.97006	6.74478	6.68085	6.39429	6.52056	8.11921	8.7365	6.85956	7.21804	6.38869	6.7972	7.65338	7.63447	7.53352	7.62136	9.0691	7.82361	6.60433	6.6848	6.60865	7.02055	7.6763	6.09045	6.68402	6.28983	5.66889	8.15726	8.55984
HLF	7.14946	7.50863	7.11476	7.78941	6.81444	6.9545	6.80053	7.08471	7.60094	4.94396	6.16372	5.73617	5.21404	7.3936	7.23987	4.33136	4.55888	4.58217	4.44357	8.27486	6.80616	8.41954	7.38503	7.65987	7.6211	5.15573	5.51363	6.03226	4.09112	8.06746	6.27531	5.9875	6.30207	5.36633	7.49902	7.2973
HLX	8.60014	7.99744	8.8767	9.07617	7.9289	7.73146	7.8579	7.81841	8.73132	6.8342	7.14717	7.21034	7.33237	7.47256	7.98323	7.28319	7.27875	6.87354	7.22497	7.63132	8.5587	8.56085	9.42576	7.82466	8.08289	5.97278	6.41111	6.28545	6.42421	8.29388	6.38086	6.75816	6.32319	6.39461	7.56711	7.6782
HN1	7.41869	8.56134	7.71241	7.94291	7.819	8.14541	7.61727	8.27261	7.77527	9.12386	8.56859	8.97109	8.69847	7.97894	7.86353	9.22776	9.03505	9.17409	9.24458	7.38061	8.1492	7.63201	7.61841	7.90916	7.50502	9.20592	9.12526	9.31253	8.94255	7.33673	10.4999	10.164	10.4424	10.3324	8.07155	8.14461
HPN	6.66288	6.73571	6.18881	6.35651	6.17151	7.03161	5.97404	6.68425	6.52862	5.46138	6.61421	5.0409	5.47665	6.20204	7.00843	5.92511	5.98349	6.37847	6.27572	6.3724	6.3429	6.49836	6.30819	6.90745	6.63162	4.50414	4.54743	4.75366	4.35012	6.00811	5.26813	5.29178	5.09891	5.17483	5.97719	6.60265
HPX	5.23664	5.50047	5.49294	5.5399	5.69749	5.62706	5.61022	5.82985	5.49154	5.5575	5.8321	5.87338	5.75134	5.6885	5.62388	5.7492	5.78606	5.80063	5.86515	5.39436	5.58661	5.46996	5.55888	5.71295	5.79658	5.79993	5.78103	5.8642	6.05882	5.56324	5.66159	5.62879	5.75772	5.68858	5.67177	5.76954
HTT	7.5425	7.09191	7.46245	7.36781	7.10274	7.33617	7.18623	7.3638	7.36353	6.3648	6.61901	6.29517	6.37876	7.02389	7.48027	7.00039	6.84086	6.95638	6.98074	7.09544	6.91764	7.27697	7.38264	7.35689	7.42371	6.42486	6.49309	6.66507	6.40842	7.3099	6.545	6.42801	6.39668	6.44316	7.13362	7.27946
HYI	7.83509	7.8304	7.50866	7.41062	7.35713	7.84174	7.39944	7.70146	7.76446	7.04476	7.4536	7.14952	7.33104	7.44359	7.48162	6.88905	6.82898	6.89459	6.72605	7.46808	7.25363	7.67459	7.42099	7.71792	7.74262	6.75895	6.79958	6.87444	7.2292	7.63187	6.84267	7.00095	6.90721	6.8619	7.22431	7.51041
AHCYL2	7.46941	6.60626	6.95464	6.96821	7.47969	7.75556	7.00878	7.11772	7.03345	5.75865	6.91193	5.25876	5.31383	7.31315	7.65302	5.5921	6.27908	5.24569	5.9156	7.4372	6.98927	7.36104	6.74647	7.20724	7.42754	5.56825	5.74582	6.11509	5.11189	6.52441	5.80825	6.02818	5.82178	5.61028	6.93783	7.20037
AHCYL1	8.87479	9.00382	8.98928	8.86614	8.992	9.09315	8.95961	8.8355	9.06843	8.61044	8.74294	8.53352	8.61047	9.04479	9.12102	8.78763	8.72976	8.7772	8.86684	8.99513	8.95973	9.00489	8.94159	9.07049	8.8672	8.14024	8.54222	8.53664	8.14199	8.85677	8.73454	8.69332	8.78342	8.68183	8.92392	9.00458
ICK	5.32412	5.18668	5.30657	5.58718	5.14027	5.21923	5.25749	5.54544	5.31885	5.91726	5.65855	6.04786	5.81514	4.94285	5.33071	5.14725	5.3623	5.2865	5.02049	5.6861	5.34592	5.71549	5.63962	5.36771	5.20698	5.72893	5.78277	5.73413	5.18972	5.37099	7.62369	7.80821	7.84997	7.63834	5.31511	5.15688
ID2	8.7186	8.46276	8.47991	8.96018	8.92799	8.657	9.02376	8.65068	8.95709	7.20566	8.2271	7.58591	7.7206	8.74779	8.54203	7.32357	7.95665	7.4692	7.26637	8.24287	9.05714	9.10384	8.56879	8.71562	8.73071	7.12655	7.48665	7.41281	6.94907	9.03333	6.52015	7.56916	7.00684	6.95232	8.99603	8.19279
ID1	10.079	10.0679	10.3234	10.9502	10.4161	9.71008	9.81182	9.40823	11.2966	8.63184	8.48629	9.02742	8.26611	10.6146	10.3777	10.0118	9.56794	10.4251	10.2526	10.7693	9.73233	11.0786	10.7149	10.3516	10.6674	9.60529	9.12603	7.53435	8.47547	10.4382	10.743	10.9251	10.9636	11.0348	10.2002	8.98327
ID4	8.72212	7.46229	8.61849	8.6465	7.4722	8.04518	8.27528	7.65066	8.77603	5.57411	6.23811	5.70568	5.88738	8.28942	8.47459	5.79645	6.90729	6.22993	6.11175	9.10625	8.0204	9.16142	8.49288	8.19879	9.1792	5.39492	5.4696	5.111	4.53382	8.2831	7.35485	6.95656	6.91037	6.57745	8.3336	8.15181
ID3	9.89681	9.32448	9.73563	9.7347	8.45871	8.96395	9.41609	8.52675	10.2134	7.82366	8.14178	8.13759	8.04107	9.42312	9.14447	9.30177	9.13539	9.33127	9.11306	9.35383	10.0105	9.93767	9.67608	9.07077	9.77282	6.60801	7.06244	6.52955	6.66861	9.62663	9.77796	9.64874	9.85249	9.7858	9.05788	8.79833
IDE	5.89814	6.07888	5.97533	6.1092	6.04399	6.21818	6.38305	6.27791	6.30246	7.25105	6.69661	7.02223	6.7022	6.37623	6.23097	6.29322	6.54754	6.33422	6.46652	6.40076	6.52218	6.22287	5.97026	6.55653	6.1712	7.52479	7.44674	7.47843	7.31256	5.9131	6.98524	6.96107	7.14367	6.58775	6.01417	5.96339
IDS	7.76754	8.05067	8.04775	7.908	8.20625	8.04113	8.05749	7.99474	8.04616	7.67085	7.55654	7.69281	7.6844	8.05649	7.73245	7.54043	7.42247	7.77593	7.51204	8.03155	7.51423	7.91596	7.83822	8.15485	7.98037	6.70106	6.84511	6.88206	6.75357	7.947	6.77431	7.17764	6.96695	7.48143	7.89375	8.10597
MMEL1	5.49713	6.09273	5.69236	6.07645	5.97193	5.34965	5.48183	5.68545	6.12473	5.45337	5.48935	5.25255	5.35418	5.82538	6.00446	5.55349	5.28951	5.65869	5.37103	5.63055	5.5791	6.05022	6.30946	5.81994	5.63158	5.42332	5.57576	5.40668	5.47735	5.64588	5.92282	5.7391	5.55022	5.86453	5.7866	5.45144
FUOM	6.11186	6.84468	6.22145	6.18122	6.18361	6.42716	6.17849	6.90568	6.61018	7.14233	6.60117	6.73302	6.6109	6.46015	6.53852	6.20439	6.24613	5.87611	6.05982	6.00943	6.38223	6.27771	6.1479	6.74428	5.9655	6.46891	6.71977	6.46173	6.4497	6.20226	6.18554	6.31376	6.18867	6.3008	6.24069	6.593
IGJ	9.32443	11.1621	8.97642	10.7262	8.77667	11.4216	9.99022	11.3874	10.3702	10.8029	11.5759	11.2916	11.1886	10.4684	10.28	10.5338	11.0966	10.3174	10.5278	9.37419	11.1444	8.20765	9.9564	10.3345	10.1316	10.039	10.8212	10.4788	10.7413	10.8327	9.71606	10.9028	10.4037	9.72203	10.3161	10.7355
ERCC6L	4.17151	4.29106	4.15881	4.08222	4.29164	4.466	4.19352	4.22953	4.33126	5.72266	5.09331	5.77189	5.67804	4.39246	4.61345	5.03455	5.13894	4.98438	5.02103	3.84845	4.06455	4.17789	4.22427	4.19037	4.59655	6.31623	6.00837	5.81384	6.00695	4.22998	6.38394	6.07429	6.38441	5.87316	4.48268	4.27796
IHH	5.70895	5.75066	5.74533	5.6699	5.51516	5.71863	5.89709	5.9154	5.83158	5.33971	5.64988	5.28761	5.39161	5.76715	5.71579	5.57708	5.53807	5.65031	5.47795	5.05932	5.63579	5.32978	5.56734	5.62028	5.46967	5.46577	5.5168	5.67944	5.68656	5.34143	5.60606	5.46071	5.49855	5.47098	5.44682	5.80368
G6PD	7.4408	8.0899	7.59611	7.32426	7.55567	7.93313	7.66054	8.14209	7.57213	7.86912	7.78369	7.74878	7.89743	7.68037	8.53276	8.47209	8.30107	8.66208	8.72056	7.31446	7.49652	7.65135	7.27731	8.44001	7.58804	6.96183	7.23083	7.57691	7.09775	7.34049	7.89161	7.70095	7.97314	7.48189	7.4226	7.87391
FUT2	4.83175	5.60579	4.54155	4.62826	5.0896	5.08611	4.68064	4.97948	4.65941	5.72921	5.57487	5.78994	5.87115	4.91305	4.95627	6.80307	6.45566	6.73712	6.61642	4.76315	5.25322	4.66047	4.73836	5.09867	4.94268	6.0347	5.87639	6.33948	6.07084	4.81685	5.91727	5.88029	5.91565	5.45091	5.23185	5.02792
FUT1	7.43563	6.24821	6.64033	7.60315	7.31228	6.01232	6.37924	6.4013	6.97374	6.07193	5.6091	5.75313	5.66557	6.23929	7.24551	6.43536	5.88001	6.66556	6.55878	7.19788	6.12582	6.97152	7.38906	6.61473	7.31671	5.71334	5.74488	5.83797	5.35491	6.70343	6.42483	6.10935	6.35238	6.19819	6.75655	6.29073
FUT5	5.00167	4.94532	4.98271	4.76444	5.25676	4.8316	5.08836	5.26882	4.96947	5.25456	5.39908	5.56212	5.32947	4.70824	4.90491	5.55768	5.37325	5.62018	5.23384	4.87847	5.26395	4.93761	4.97734	5.07811	5.06242	5.5984	5.57275	5.78423	6.19806	5.26045	5.65692	5.33674	5.4314	5.32364	5.14103	4.95415
FUT8	6.09101	6.53396	5.91691	6.20324	6.39403	6.37957	6.12842	6.04876	5.96295	7.45249	7.27689	7.65106	7.50223	5.85163	6.30655	6.48217	6.78543	6.2896	6.65081	5.6704	7.15979	6.2202	5.93824	6.19005	6.38372	6.58883	6.95199	6.95064	7.24608	6.12206	7.39913	7.49045	7.71584	7.01159	6.50527	6.12678
FUT7	5.36705	5.92293	5.36481	5.4155	5.23588	5.64153	5.31159	5.96313	5.30439	5.65923	6.05674	6.04252	6.17359	5.50954	5.43746	6.36246	5.94798	6.45997	6.0008	5.43847	5.51282	5.36547	5.21635	5.59561	5.5793	6.25327	6.5248	6.43504	7.03401	5.41458	6.17869	5.96218	6.17885	6.29862	5.44678	5.54579
FUT9	2.35793	2.47699	2.43553	2.5028	2.4793	2.47826	2.44571	2.63842	2.42998	2.3666	2.43827	2.37798	2.55119	2.44567	2.37886	2.37709	2.46323	2.46152	2.47776	2.29461	2.63798	2.33469	2.35519	2.41611	2.27239	2.50956	2.55935	2.35157	2.66075	2.73703	2.29199	2.50556	2.30403	2.37635	2.49255	2.39782
IL6	11.01	6.62515	6.55617	7.30678	12.8306	10.8947	11.1815	7.49342	8.42465	6.79393	7.60001	5.60565	5.89916	11.2077	9.13239	7.10278	10.2175	7.69961	8.73558	6.84904	10.6918	8.17349	6.20237	4.96621	8.91311	5.87376	6.57316	5.63076	6.00803	8.32219	7.17208	8.53537	7.13014	8.17088	11.9061	9.2387
IL7	5.52715	6.24524	5.89067	5.78362	4.66518	4.89375	5.35188	5.63559	5.82546	4.34955	5.354	4.65613	4.7315	5.78001	5.43377	4.71754	5.02831	4.66105	4.85754	5.51237	5.57593	5.6356	5.61903	5.17557	5.56653	4.80141	4.52711	3.59207	4.64275	5.60759	3.82608	4.34152	3.55915	4.28659	5.64151	5.60223
ILK	9.38281	9.57923	9.57734	9.58373	9.52818	9.34954	9.82159	9.64745	9.38896	8.93432	9.03055	8.86007	9.16038	9.80148	9.5674	9.10375	8.93163	8.8384	8.89658	9.6796	9.24282	9.62139	9.77623	9.68579	9.67757	7.95992	8.12908	8.02482	8.5011	9.38959	8.38805	8.63065	8.42831	8.6907	9.29321	9.66882
INA	3.9824	4.15127	3.83114	3.77389	4.05459	4.22724	4.1263	4.15518	3.94571	5.16075	4.7259	5.80872	5.49964	3.99487	4.0739	4.34894	4.48037	4.45457	4.36593	4.18766	4.48858	3.92939	3.91196	3.82379	4.01157	4.52668	4.26901	4.39706	4.61142	4.09232	3.98454	4.21834	4.19432	4.08032	4.06365	4.04128
IPP	5.44391	5.93873	5.59996	5.28705	5.09418	4.87095	4.70015	4.82308	4.98973	6.02173	5.64025	5.97909	5.83843	5.79724	5.68265	5.45566	5.4091	5.77258	5.69378	5.96317	5.53115	5.61118	5.76483	5.56161	5.57811	5.5051	5.67731	5.6113	5.41226	5.43065	6.3885	6.14734	6.46299	6.2685	5.35551	5.29962
AX747826	7.7993	5.32149	6.36666	6.26151	6.28767	6.39655	7.13895	5.5748	6.72583	4.98967	5.18044	4.83336	4.64901	6.5863	7.97194	5.18432	6.42811	6.09925	6.14623	8.24755	5.68196	7.55201	6.40129	5.49375	8.09552	4.84225	4.64367	4.79612	4.78793	7.16479	5.08336	4.94778	5.2022	4.85515	7.35315	6.83618
ITK	6.50453	5.99341	6.26858	6.62658	7.88619	7.13088	7.30547	7.06774	6.26939	6.97272	8.46482	7.28873	7.64297	8.22056	6.26133	6.70199	7.70604	5.94153	6.69358	6.7176	7.43288	6.82821	6.93407	6.02524	6.61963	6.00391	6.50608	6.26516	5.62411	6.9141	4.49824	4.78563	4.74576	4.0714	7.02177	6.80497
IVD	6.85376	7.34539	7.07793	7.4036	6.57791	7.26616	7.03471	7.31333	7.37091	6.82918	7.3118	6.72207	6.74812	6.99579	7.50842	6.73185	6.57457	6.54181	6.72279	7.47283	7.22405	7.14521	6.75506	7.39923	7.07959	6.62288	6.81864	6.90216	6.83502	7.18122	7.84811	7.68204	7.95006	7.44703	6.8446	7.25903
IVL	3.73168	3.94174	3.89357	3.9766	4.30514	4.19898	3.71836	4.18616	3.72891	5.0481	4.74925	5.04077	5.38327	4.06216	3.95503	9.90234	9.27058	9.68639	9.48299	3.70938	4.15978	3.95676	3.95989	4.06224	4.07708	6.26185	5.65929	6.65855	5.22677	3.94833	5.93865	6.56165	5.97803	5.42818	4.26809	4.04293
CASKIN2	8.58766	7.78574	8.42307	9.07862	8.83927	8.30521	9.05361	7.98373	8.5619	6.80479	6.96873	6.51275	6.76661	8.35975	8.73974	6.55022	6.80866	6.66127	6.78856	8.83172	7.59102	8.36464	9.14355	8.63787	8.95708	6.50996	6.50137	6.7176	6.23616	8.25202	7.24971	7.26036	7.35364	6.87006	8.96031	8.02615
JMY	6.81372	5.83077	6.17274	6.3701	6.11241	6.56804	6.67299	6.10326	6.30563	6.55277	6.40931	6.64174	6.61939	6.65792	6.3061	6.20269	6.32251	6.78599	6.35858	6.12678	6.2502	6.19226	6.26396	5.76057	6.31089	6.39002	6.77875	6.72237	5.89713	6.29626	7.28064	7.46518	7.38881	7.51674	6.5606	6.42527
BDKRB2	6.62072	5.59601	5.90458	4.77153	8.98064	7.59091	6.60393	5.80283	5.17319	7.19532	6.32424	7.09847	7.1103	6.45935	5.67708	6.57459	6.74812	6.56728	6.84386	4.84019	6.02874	5.51459	4.73938	5.05336	5.71998	6.06705	5.96795	6.04554	6.13603	5.47672	5.76297	5.92566	5.68377	6.14035	7.26547	6.05303
BDKRB1	4.9668	4.10863	3.99425	4.08911	6.83197	5.83024	4.98121	4.76917	4.10627	6.367	5.19859	5.90699	6.06632	5.06836	4.35664	5.47447	5.49085	5.32925	5.50423	4.23075	5.33479	3.91405	4.21964	4.12675	4.18133	5.08346	5.1564	5.61291	5.1377	4.36785	4.88685	5.11349	4.69025	5.63354	7.43125	4.27493
JPX	6.01803	4.7765	6.30778	5.129	4.33137	4.83762	4.57023	5.1341	5.21012	4.55877	4.70195	4.41067	4.71997	5.03209	5.0412	4.50222	4.55423	4.88708	4.76929	5.59576	4.62488	5.32079	6.13072	5.07195	5.29122	5.83866	5.6845	4.62197	5.1648	5.13876	5.43276	5.32425	5.65604	5.63473	4.61847	5.05731
JRK	6.3421	6.05207	6.59719	6.24769	5.9908	6.13483	6.35059	6.14115	6.46123	6.32923	6.28921	6.2386	6.27199	6.15994	6.25271	6.3754	6.32749	6.3539	6.31234	6.45976	6.29452	6.36359	6.49712	6.56707	6.31874	6.62728	6.43272	6.4085	6.44872	6.46379	6.36769	6.22498	6.28794	6.29112	6.08114	6.26195
ARID4B /// RBM34	6.70635	6.80649	6.85788	6.81798	6.68313	6.59198	6.58632	6.60891	6.99061	7.66966	6.94586	7.47568	7.11412	6.91441	6.72671	6.9867	6.91541	7.09127	7.12692	6.79191	6.70376	6.84226	6.85274	6.6968	6.56206	7.5295	7.46689	7.64829	7.26791	6.72074	8.04092	7.95978	7.95461	8.18627	6.69183	6.52815
JTB	10.0536	10.4429	10.1142	10.0375	10.1312	10.3556	10.0175	10.2908	10.1896	10.3078	10.2038	10.353	10.3724	10.1239	10.2079	10.2434	10.3118	10.2662	10.2874	10.0625	10.2867	10.2338	10.1857	10.2523	10.2519	10.8049	10.5641	10.605	10.8265	10.218	10.394	10.1864	10.3593	10.0887	10.26	10.2687
JUN	10.7893	8.98117	8.80758	10.0111	9.67246	9.75121	10.5324	9.06559	10.13	8.01698	8.9918	7.93424	7.27063	9.92816	10.7198	9.56654	9.22053	9.89154	9.36117	10.1712	9.49494	10.3886	9.78706	8.33455	10.5662	7.7657	8.24842	7.75075	7.41315	10.9156	9.31339	9.32899	9.15223	9.62917	10.2766	9.46868
JUP	8.71149	8.33837	8.78684	8.45028	8.33823	8.24997	8.98675	8.09744	8.60778	10.2227	9.01095	9.94503	9.90982	8.31927	8.58248	10.6247	10.1673	10.8454	10.8286	8.54532	8.27581	8.39645	8.86044	8.40638	8.61657	10.8088	10.4043	10.3461	10.3001	8.07234	10.7706	10.6472	10.7337	10.9049	7.83834	8.37927
KCP	4.6073	4.51356	4.57519	4.67511	4.70574	4.49463	5.09862	4.59943	4.57596	4.81499	4.65484	4.87275	4.84903	4.65218	4.8241	5.37993	4.98486	5.68287	5.33355	4.40421	4.93078	4.67224	4.46845	4.70627	4.58867	4.88607	4.50402	4.7372	4.8287	4.91485	5.06555	4.97427	4.80983	5.08098	4.67498	4.83568
KDR	8.71519	8.15241	9.4362	9.18497	8.84175	8.40015	8.80803	8.17061	9.11706	6.51051	7.01059	5.52637	6.03436	8.38537	8.59408	6.56149	6.78934	6.17376	6.67928	8.48172	8.25025	8.88546	9.67662	8.83692	8.93549	5.41422	5.82077	5.75005	5.77842	8.39647	6.27099	6.77813	6.21806	6.07441	8.41748	8.32198
KHK	6.25536	6.03857	6.0307	5.89027	5.72093	6.04821	5.77345	6.13644	6.1153	5.86964	5.85297	5.95408	5.99255	5.94769	6.17122	5.94511	5.80877	5.91313	5.81753	5.8857	5.8313	6.18466	6.29193	5.81194	6.1471	6.46978	6.57413	6.64807	6.69512	6.03019	6.11887	6.05231	6.05515	6.16248	5.64524	6.11127
KIN	6.80951	6.70085	6.73603	6.61037	6.76902	6.58068	6.48924	6.79033	6.96787	7.12697	6.66042	6.99899	6.7736	6.62969	6.65107	5.85254	6.20414	5.82128	6.08968	6.54054	6.69679	6.65559	6.91509	6.588	6.49451	6.9857	7.21409	6.97078	5.95864	6.64177	7.61912	7.1894	7.36337	7.33714	6.79793	6.20618
KIT	9.25168	8.8587	9.07229	7.54478	9.1682	8.81527	9.41406	9.08404	9.55951	7.29849	8.25122	7.55068	8.05982	8.51552	8.33474	7.23719	7.49434	7.127	7.15163	8.82635	8.92866	9.49887	9.23735	8.84055	9.47718	5.75659	6.21548	5.75561	6.2014	9.56317	6.99926	7.21412	6.72539	6.87191	8.11884	8.47207
KIZ	7.53843	7.24702	7.43456	7.33451	7.27886	7.26291	6.92269	7.18362	7.49019	6.53971	7.00676	6.70624	6.96738	7.12978	7.09535	9.04283	8.08042	9.00641	8.92586	7.13455	7.03309	7.18761	7.46034	7.01012	7.25176	7.68987	7.75115	7.76394	7.35764	7.70709	7.32018	7.47782	7.2418	8.02263	7.49454	7.20631
KLB	5.2013	5.19433	4.87269	6.93067	5.76926	7.78177	5.1711	7.43776	6.58668	3.79929	4.61747	3.88322	3.8584	5.52541	7.0299	3.90039	3.88248	3.76526	3.92236	6.59752	5.01061	6.5872	4.91416	7.1747	4.79807	3.55426	3.5056	3.6079	3.53435	5.11285	3.96135	3.74544	3.66496	3.5397	4.66744	6.82492
MMGT1	8.96241	9.06951	8.99437	9.06243	9.06808	9.10932	9.11521	8.94587	9.06367	8.96008	8.94196	9.16616	9.01896	8.98154	9.17297	9.06863	8.91002	9.23638	9.02962	9.13	8.82492	8.9953	9.27675	9.2512	9.03515	8.95296	8.99678	8.91562	9.02225	8.90541	8.51723	8.59586	8.65572	8.68468	8.97877	8.87114
KMO	6.16057	6.48511	5.96273	6.58933	7.80579	7.71945	7.11233	7.12269	7.13662	6.38004	6.94702	6.29369	6.05435	7.45523	7.87705	5.06697	5.66919	4.54403	5.10757	6.53673	7.2637	6.74206	6.52522	7.14912	6.66632	5.7618	6.14946	6.15239	6.12747	7.15728	4.62431	5.41136	4.99406	4.33444	7.88859	7.2792
LBH	10.2908	10.2163	10.1384	10.1278	9.28314	9.55011	10.2139	10.3005	10.7733	9.27548	9.78842	9.61161	9.89652	9.66769	9.84149	9.38738	9.20783	9.21193	9.18637	9.82027	10.0952	10.3387	10.1331	10.0117	10.2032	9.06082	9.11017	8.74254	9.74556	10.7659	8.03791	8.4549	7.93549	8.64442	9.87623	9.89109
LBP	4.12774	4.53215	4.1455	4.03476	4.34876	4.14828	4.61545	4.37281	3.9837	4.44884	4.31971	4.32084	4.26362	4.21227	4.16523	4.79723	5.51168	4.40703	4.73082	4.01921	4.34805	4.14562	4.09905	4.09797	4.30526	4.45419	4.31373	4.46241	4.444	4.13427	4.53635	4.63777	4.30955	4.60725	4.2379	4.90862
LBR	8.29439	8.02331	8.11657	8.39541	8.30089	8.19266	8.11017	8.38781	8.14216	9.06164	8.65668	8.86679	8.72943	8.06255	8.10019	8.60001	8.52495	8.5044	8.77126	8.0092	8.47026	8.23779	8.33729	8.09578	8.01681	8.78098	8.60691	8.54926	8.61686	8.16137	8.73192	8.67606	8.73981	8.53745	8.21264	7.88943
LCK	6.48232	6.86996	6.1267	6.99166	6.71343	6.61596	6.71324	7.48602	6.58668	7.19053	8.28287	7.4689	7.68315	7.39094	6.40171	6.81933	7.25054	5.95838	6.70781	6.09591	7.43451	6.91595	7.26581	6.48149	6.59443	6.8984	7.41924	7.43649	6.93549	7.25076	5.11416	5.89423	5.46233	5.07986	6.42096	6.8085
LEP	3.69931	3.59461	3.50543	3.65815	3.78439	3.652	3.77591	3.68348	3.52121	4.63755	4.08231	4.10473	4.01244	3.48302	3.78847	3.77617	3.79856	3.78749	3.86747	3.63288	4.93067	3.56476	3.59296	3.62353	3.56801	3.86644	3.72224	4.03849	4.16912	3.64962	4.9334	6.48746	5.65563	6.76978	3.81701	3.60117
FXR1	7.20226	7.13718	7.23673	7.13818	6.73376	6.64886	7.04475	6.73207	7.2485	9.14295	7.81572	8.99678	8.52471	7.17477	7.05222	8.09144	7.71845	8.53885	8.12333	7.37636	7.11663	7.10958	7.15152	6.91526	7.0677	8.73939	8.53822	8.19032	8.27156	7.1132	8.75699	8.43005	8.62118	8.84925	7.15045	6.84041
FXR2	7.22261	7.1657	6.72974	6.82496	7.13647	7.41527	7.1151	7.1668	7.00638	6.95	7.07277	7.01328	7.20067	6.92074	7.19844	7.25685	7.0542	7.2946	7.1794	6.76712	6.90925	7.14325	7.09798	7.0777	7.2115	7.13189	7.18222	7.20162	7.34546	6.92438	7.66937	7.64437	7.74256	7.59783	6.81652	7.04434
LIF	7.79036	5.93201	5.52394	5.21267	11.1106	9.64136	7.34152	6.29261	6.15353	6.62963	6.57572	6.31587	6.18653	7.8916	6.6589	6.89712	8.45758	7.04889	7.5982	5.71496	7.84658	6.32202	4.91426	5.25162	6.8742	5.81132	6.12034	5.94498	6.23924	7.49726	6.72009	7.21107	6.60824	7.3139	9.12271	6.51194
AHCTF1	6.69856	6.46035	6.67247	6.90324	6.8691	6.71306	6.57573	6.68283	6.73809	7.40435	6.51276	7.00078	6.92749	6.71895	6.70709	6.5881	6.82252	6.79254	6.94606	7.36482	6.56176	6.88106	6.79379	6.38691	6.52061	7.22454	6.90889	6.9484	6.80598	6.76814	7.793	7.57428	7.67861	7.50143	6.98918	6.26893
LOX	6.96231	5.75548	6.14208	6.27813	7.10908	5.85022	8.80041	5.6169	6.26928	7.98087	7.33279	7.97186	7.94671	6.63339	5.68888	8.38815	8.33863	8.1852	7.75706	5.98376	8.14458	6.63396	6.16866	5.6678	6.28294	7.3152	6.82215	6.17639	7.99219	6.25238	7.52706	8.11008	7.97251	8.91437	6.55932	6.08397
LPL	10.3068	9.97874	10.1568	10.3537	10.349	10.3586	10.3322	10.3024	10.4087	6.22346	8.81557	5.93979	6.02839	10.0294	10.5428	7.17886	7.52467	7.15734	7.30956	11.0339	9.90272	10.4987	10.4439	10.3061	10.1282	5.35561	5.86697	6.18323	5.01973	10.241	6.05504	7.21461	6.2849	5.04331	10.5994	9.93341
LPP	7.22575	6.5249	7.40199	7.25526	7.2463	6.83322	7.12957	6.71868	7.4254	6.79104	6.60081	6.85464	6.76938	7.12486	6.97035	7.29966	7.01561	7.67193	7.36736	7.59439	6.81562	7.32344	7.22148	7.00546	7.23155	7.1622	7.13659	6.86881	7.25459	7.24924	7.09365	6.95189	7.0071	7.22004	7.09635	7.12779
ASNSD1	8.52919	8.54868	8.3246	8.59556	8.49152	8.46778	8.26155	8.0943	8.77715	7.99904	8.23397	8.02252	7.93184	8.64216	8.58258	8.20184	8.28485	8.21037	8.38592	8.83305	8.33755	8.60995	8.70642	8.45674	8.4545	7.96196	7.81157	7.79566	7.63513	8.58548	7.69674	7.62843	7.80741	7.61643	8.39423	8.32729
LSR	8.28798	8.41109	8.00783	7.63887	8.1324	8.5246	8.17263	8.52979	7.96307	9.57415	8.71336	9.02929	9.5784	7.71673	8.42204	9.53972	8.75664	9.8812	9.26821	7.21858	7.81395	7.83375	8.15025	7.83372	8.17546	9.84197	9.48359	9.35146	9.32164	7.33991	8.97885	9.00921	9.03269	9.13996	7.4743	7.75331
LSS	7.42494	7.15241	7.07373	7.14127	7.05835	7.34252	6.60073	7.39644	7.09126	6.19057	6.41891	6.41061	6.75936	6.61828	7.36318	6.81164	6.44252	6.72816	6.67635	7.06047	6.7013	7.20832	6.92552	7.44006	7.19592	6.49413	6.46981	6.3609	6.44861	7.39401	7.07176	6.90998	7.20588	6.77585	6.90621	7.02641
LTB	6.31589	5.91734	5.6813	5.97494	6.02118	6.11826	5.62487	6.21487	5.77962	6.22961	6.76111	6.01615	6.2591	5.98905	5.62313	6.61216	6.63554	6.12591	6.44794	5.34118	6.65143	5.73177	5.82106	5.96746	5.47575	6.50574	6.64996	6.59078	6.58603	6.06752	5.75459	5.91293	5.79991	5.65215	6.01531	6.00433
LTF	8.09721	9.82429	7.35038	6.97	6.83582	7.20108	6.30366	6.89469	6.22964	10.6601	11.8768	5.86087	4.38659	6.15389	7.67722	10.9474	12.035	10.3514	10.8309	5.95804	12.3186	6.5235	6.26764	6.7288	7.75071	8.19956	9.72489	8.49558	7.80232	9.86961	7.75368	9.73379	8.7634	9.2434	9.38074	7.77724
LTK	4.46295	5.69236	5.51159	5.65453	5.94684	5.78042	5.45851	5.52365	5.7279	5.03706	5.13994	5.0863	5.26155	4.8175	6.30831	5.32955	5.15171	5.25193	5.07341	4.80053	4.71469	4.6935	6.70699	6.34556	6.00573	5.25043	5.36811	5.473	5.72603	5.67167	5.07918	5.09205	5.24741	5.13069	6.01227	4.96465
LUM	10.9438	10.4499	10.8079	10.8196	10.8366	10.6874	11.0359	10.8858	10.9089	11.0458	11.2694	11.1748	11.2898	10.8432	10.5069	11.0419	11.0554	10.9922	11.0196	10.8963	11.3053	11.1599	10.7684	10.7839	10.6912	10.2821	10.5088	10.4013	10.8199	10.9168	10.0618	10.8526	10.5341	10.7179	10.8101	10.8899
LXN	9.24174	8.85349	9.03312	8.08089	8.5136	8.02904	9.6136	8.5025	8.60217	9.18774	9.52599	8.92866	9.09496	8.663	7.86599	9.21092	9.19969	8.66622	8.81713	8.15065	9.9219	8.61952	8.78628	8.33599	8.52919	7.79846	8.26627	7.98366	8.46182	8.85582	7.65803	8.34568	7.90077	7.99295	9.00881	8.8728
LY9	5.80925	5.84853	5.16272	5.46874	5.48763	6.57285	5.88821	6.35828	5.56322	5.85997	7.02344	6.58155	6.89863	6.09233	5.58272	5.36698	5.94556	5.3129	5.68713	5.0976	6.66455	5.60494	5.84707	5.40229	5.80645	5.72883	6.18909	6.33016	6.47985	6.34137	4.77478	5.39701	5.00487	5.00218	5.61133	6.33835
LYN	8.23057	8.36767	8.45825	8.49818	9.3548	9.03537	8.60655	8.57598	8.47715	8.28778	9.05141	8.20069	8.30758	8.86021	8.66243	8.22384	8.69318	7.74249	7.94116	8.35554	8.86535	8.4298	8.19439	9.08382	8.43981	9.1972	9.16903	9.19865	8.8069	8.45645	8.37666	8.52636	8.54483	7.32797	8.5074	8.62368
BBIP1	7.04481	7.06766	7.00632	6.84398	7.09182	6.74719	7.09812	6.93982	7.09291	6.05011	6.72396	5.96123	6.33264	7.02286	7.03443	5.67994	6.3499	5.87671	5.76426	7.13784	6.74991	7.12898	7.09149	6.97641	7.23687	5.78685	6.18375	6.04443	5.91485	7.10786	5.14278	5.51662	5.34107	5.45156	7.16503	6.80504
LYZ	10.5791	10.8228	11.1585	10.8359	11.0452	11.2585	11.6448	11.6682	10.9989	11.4875	11.5939	11.2845	11.1021	11.488	10.0705	10.5476	11.1168	9.90487	10.1309	11.0207	11.3556	11.0181	11.0614	11.0549	10.2675	10.4731	10.9161	10.8393	10.9577	10.7841	8.88841	9.87319	9.36639	8.83579	11.1647	11.0587
MAF	8.47776	8.07546	8.18923	8.3924	8.08219	7.45487	8.23033	8.25572	8.58582	7.81807	8.30418	8.20464	8.25645	7.95125	7.96472	8.50788	8.24765	9.05614	8.50181	8.22933	9.02877	8.52835	8.50242	7.91931	7.89005	6.9539	7.2937	7.30071	7.42235	8.95628	7.95405	8.27662	7.97563	9.24662	8.47881	8.04676
MAK	4.51424	6.05954	4.8164	3.82035	5.88409	5.4765	4.58695	4.26748	3.46052	3.66111	3.66964	3.55555	3.51167	5.04129	3.89783	3.45506	4.3523	3.37183	3.14249	3.34245	3.61496	3.26458	3.96863	4.07813	4.69913	3.22717	3.29581	3.23333	3.30862	4.86677	3.43679	3.44817	3.2636	3.20096	5.84931	4.89107
FSCN1	7.53143	6.74957	7.16815	7.16823	6.89595	6.4071	8.3472	6.98035	7.00124	9.04545	8.15575	8.2661	8.51826	6.83399	6.89436	9.6572	8.97393	9.69328	9.5078	6.5047	8.13298	7.08202	7.5709	7.17465	7.14524	8.85787	8.83007	8.87885	8.75295	6.85612	9.24483	9.66712	9.59084	10.0025	6.57406	6.89144
MAL	8.28364	8.38292	8.10933	8.10716	8.13405	7.96883	7.75678	8.01656	8.49741	6.46061	6.85119	6.22337	6.35267	7.85087	7.95763	6.01412	6.21206	5.15329	5.80899	8.57986	7.4637	8.21814	8.48075	7.68657	7.88843	5.77423	6.24042	5.96215	6.11119	8.95021	7.26751	7.65918	8.28962	7.26287	8.56947	8.14809
MAX	7.27227	7.41083	7.33382	7.1975	7.07574	6.8535	7.5146	7.19609	7.46641	7.4645	7.50217	7.64173	7.43806	7.38925	7.22439	7.04233	7.25703	7.07769	7.20872	7.34295	7.43395	7.49586	7.51291	7.38496	7.34573	7.4024	7.58548	7.63344	7.48409	7.36979	6.83352	6.82271	6.79416	6.66018	7.23428	7.13058
MAZ	6.14575	6.5158	6.10816	5.92097	5.81581	6.04188	7.08225	6.86155	5.74109	6.81771	6.70614	6.30444	7.20933	6.05887	6.48731	7.12	6.9351	7.09535	6.82897	6.11018	6.053	6.25699	6.31433	6.93924	6.63147	7.07868	7.24608	7.17383	7.42074	5.87472	7.51738	7.03101	7.2815	7.26224	6.00647	6.36447
MBP	7.82272	7.78385	8.04163	7.99319	7.55088	6.86941	7.84003	7.88855	7.30806	7.38966	7.90809	7.24486	7.04206	7.70331	7.04629	7.38498	7.46457	7.41474	7.35405	7.95997	7.32191	7.60049	8.05984	8.41138	7.61558	7.39105	7.29731	7.09857	6.885	7.45087	6.91916	6.85471	6.84938	6.77527	7.5146	7.6767
MCC	6.58095	6.34477	6.35747	7.24375	6.81641	6.60655	6.23291	6.39888	6.91189	6.7937	6.29584	6.52586	6.5266	6.51885	6.5818	7.54786	6.98834	7.89105	7.61281	6.69993	6.24795	6.6666	7.27481	6.30808	6.59991	6.75646	6.63902	6.74018	6.39054	6.71667	6.18244	6.47973	6.31892	6.90225	6.50704	6.48477
MCU	7.54042	7.82769	7.79077	7.63826	7.92847	7.69504	7.58273	7.75619	7.63158	7.80503	7.47782	7.60052	7.56578	7.57038	7.70774	6.99646	7.23044	6.59746	7.17265	7.61268	7.73626	7.61827	7.57584	7.63682	7.60255	7.37504	7.31169	7.56481	7.52572	7.26851	7.81122	7.7136	7.82348	8.00024	7.25604	7.51056
MDK	7.12142	7.07835	7.2398	6.62974	6.45172	6.24686	7.81868	6.56329	7.101	8.8152	8.12734	8.87431	8.55528	7.28718	6.50027	8.3025	8.27442	8.54064	8.16554	6.00857	7.73563	6.39631	6.92323	6.70416	6.87506	8.62214	8.43845	7.7844	8.13404	7.32149	9.61706	8.99312	9.4482	8.87299	7.27492	7.00166
ME1	6.68527	6.77331	6.63591	6.99955	7.0056	6.97309	6.88092	7.17719	6.92966	6.88738	7.44788	6.88844	6.89243	7.29834	7.33976	7.38336	7.57472	7.7384	7.68472	6.80346	7.64475	7.09999	6.81306	7.28807	6.84981	6.91087	7.21643	7.48683	6.30385	6.18554	6.65821	6.85049	6.89029	6.5172	6.56098	7.02667
ME3	7.24913	7.41669	7.1498	7.01866	6.76394	7.17526	7.589	7.28631	7.20695	5.43217	6.32191	5.69628	6.186	7.16658	6.95411	6.5811	6.58267	6.38009	6.78867	7.28744	7.194	7.27248	6.98002	7.47051	7.32295	5.08066	4.89042	5.12797	5.13365	7.20008	5.78614	5.96538	5.50401	5.24641	7.12138	7.30341
ME2	8.19698	8.53725	8.33695	8.47108	8.46447	8.62089	8.28029	9.17466	8.49791	8.95272	9.11523	8.82246	8.7822	8.63923	8.60365	8.56583	8.74934	8.48792	8.55105	8.44153	9.24851	8.43382	8.27661	8.96204	8.39616	8.85508	9.35462	9.69442	8.74978	8.50386	9.31585	9.49744	9.43901	9.46537	8.44796	8.39257
MET	5.95362	6.06438	6.52741	6.05964	6.11581	6.43106	5.94763	5.86761	5.87995	5.86958	5.61965	5.53945	5.14405	6.0608	6.12536	6.49341	5.95306	6.69824	6.64534	6.27736	5.46859	6.16678	5.96884	6.29626	6.24372	5.44335	5.26196	5.36306	5.36419	5.98037	5.22812	5.25813	5.23882	5.9814	5.62804	5.78898
MFF	8.34877	8.4436	8.26631	8.30289	8.05324	8.09182	8.36124	8.28933	8.5194	8.10998	8.23805	8.22464	8.3215	8.22015	8.49149	8.83788	8.68611	8.94055	8.89898	8.58099	8.55788	8.50177	8.56562	8.32413	8.33572	7.45196	7.70352	7.73831	7.69025	8.34987	8.26154	8.13926	8.37366	8.20348	8.17621	8.18041
MGA	6.76722	6.64897	7.21329	6.84841	6.31871	6.77735	6.91934	6.48706	6.78207	6.66168	6.87948	6.72142	6.4384	6.76542	6.76119	6.30215	6.54244	6.61899	6.68647	6.88226	6.82511	6.72806	6.77082	6.67995	6.72454	6.99507	6.982	6.64478	6.39721	6.83913	7.10074	7.01887	7.09764	6.9524	6.59233	6.52552
MGP	8.66917	8.27714	9.11562	8.61808	7.45058	8.19525	9.26178	8.0964	8.7625	7.08805	8.15204	6.46521	6.78245	9.61486	8.60622	7.85707	8.58053	7.47753	7.90402	9.4305	9.20635	8.4039	8.99814	8.3339	9.06795	5.7032	6.61324	6.43877	6.80624	8.95399	6.66412	7.53205	6.73538	6.41824	8.24364	9.32592
MIA	4.92459	5.65813	4.76523	5.08163	5.33691	4.77989	4.69031	5.29696	5.08362	5.10401	5.44009	5.36703	5.49061	5.13449	5.06881	5.62019	5.86388	5.22838	5.0968	4.81505	5.1878	4.81827	5.1539	5.00248	5.04735	5.35673	5.34942	5.71521	5.64552	4.71206	5.49256	5.34173	5.42304	5.56186	5.40619	5.41181
MIF	10.603	11.2051	10.4615	10.4325	10.3566	10.496	10.4349	10.8673	10.653	12.1322	11.5547	12.0353	12.0329	10.2684	10.3577	12.0089	11.74	12.2039	12.1018	10.029	11.0279	10.153	10.2804	10.4123	10.4262	11.8444	11.8322	11.8943	12.0599	10.4456	12.2738	12.2227	12.276	12.4546	10.7029	10.6027
BOLA2 /// LOC101060386 /// SMG1	8.886	8.2544	8.9722	8.9181	9.16975	8.7686	8.56279	8.92546	8.76274	8.78342	8.80361	8.7938	8.9931	8.79593	8.68019	8.47877	8.72078	8.7361	8.6739	8.9758	8.82215	8.84133	8.89761	8.8529	8.82057	9.01892	9.02172	9.06827	8.84428	8.96876	8.45013	8.58272	8.61048	8.67936	8.96087	8.62755
MLX	7.69184	8.37806	7.98881	8.08949	7.5521	8.07921	7.82009	8.22928	8.03537	8.02413	7.92388	8.05689	7.85792	8.01319	8.1714	8.20754	7.99052	8.12993	8.1896	8.0146	7.91346	8.13484	7.97548	8.34166	7.94215	8.26426	8.19254	8.44354	8.25405	7.66704	8.55747	8.35822	8.57679	8.38165	7.54516	7.94582
MME	7.50754	7.23621	7.57705	7.69714	7.25606	7.17794	6.91555	6.56669	8.43204	5.62545	5.25363	6.48501	6.60115	7.68918	7.98001	6.45359	5.46326	7.04041	6.37276	8.28211	4.92524	8.4307	8.47223	8.00977	7.44675	6.4238	6.06704	4.68178	5.05979	7.44792	4.23219	4.70459	4.36837	5.60218	7.31065	7.29207
MMD	6.44231	6.1522	6.2963	6.70769	6.68821	6.78608	6.46775	6.3698	6.54901	7.38059	6.91064	7.34505	7.20811	6.53294	6.55501	7.27902	6.88104	6.96975	6.9649	6.44666	7.00214	6.45091	6.359	6.47391	6.65838	6.12225	6.16231	6.12215	5.96338	6.42227	5.98207	6.08171	5.98874	6.29842	6.6157	6.85334
MN1	6.13097	5.70536	6.10662	6.98202	7.01105	6.36777	5.62917	6.31565	5.94774	6.76538	5.82724	6.81498	7.05962	5.94042	6.3994	6.85875	6.67306	6.98016	6.7279	6.15538	6.70069	6.11836	6.20417	6.25684	6.4166	5.9752	6.19678	6.31119	6.04681	6.48899	4.34616	5.37321	4.75392	5.46462	6.91347	6.35641
MNT	7.81444	7.91348	7.92985	7.90518	7.53676	7.73565	7.4215	8.18559	7.96094	7.40282	7.55192	7.48766	7.66061	7.50436	7.73868	7.83958	7.78931	7.86404	7.79796	7.60605	7.78145	8.0072	7.83253	7.91998	7.86393	7.58574	7.53947	7.49749	7.52068	7.89297	7.68537	7.82322	7.75886	7.72826	7.85966	7.80447
MOK	6.24101	7.37827	6.9405	5.98296	6.5458	6.18311	5.95741	6.35915	5.71219	7.39506	6.59455	7.88488	7.6354	6.47379	6.07713	6.13359	6.37419	6.18843	6.21348	5.87244	5.96698	5.92301	5.94326	6.09098	6.58681	5.97096	5.97296	5.89993	5.97186	6.673	8.0658	7.69486	8.05911	7.85518	6.60769	6.30589
MPG	7.18225	7.85539	7.33336	7.48206	7.20372	7.49278	7.57389	7.52035	7.56486	7.61248	7.51434	7.469	7.4281	7.16978	7.32543	7.66321	7.63914	7.51375	7.56246	7.16346	7.59643	7.42776	7.30253	7.32803	7.15047	7.4036	7.51122	7.50327	7.64234	7.2335	7.46887	7.34281	7.37199	7.57572	7.18676	7.39781
MPI	5.28917	5.90089	5.3274	5.48444	5.27269	5.6194	5.46676	5.83545	5.69485	5.6115	5.79706	6.0245	5.99049	5.40148	5.54588	5.77215	5.6857	5.63361	5.78966	5.43815	5.90716	5.43162	5.54467	5.69655	5.49881	5.93941	5.97895	6.09457	5.86361	5.37567	6.78505	6.80804	6.89102	7.08965	5.51347	5.527
MR1	5.91277	6.64742	5.89951	6.56393	6.03338	6.66055	6.22937	6.57143	6.49198	7.03656	6.68716	6.57121	6.46622	6.52857	6.61034	6.63434	6.45348	6.77141	6.77762	6.10689	6.62951	6.28623	6.08644	6.78968	5.88759	7.16749	6.63831	6.13423	7.25882	6.22003	6.17079	6.47304	6.45461	5.9391	6.18936	6.60439
MSC	5.01291	4.91915	4.19908	4.20923	6.80273	5.41457	5.587	5.10027	4.14856	5.07033	5.43824	5.35066	5.64571	5.24854	4.47404	5.86917	5.66917	5.95106	5.84699	4.16197	5.32989	4.46132	3.97216	4.59278	4.24254	4.96451	5.33085	5.19293	5.57102	4.7079	4.67611	5.02954	5.10558	5.40205	5.60064	4.4473
MSN	10.8136	10.9003	11.0815	11.2575	11.2669	11.0929	11.3014	11.1405	11.0949	10.504	10.8992	10.0531	10.3124	11.1487	11.1037	10.9966	10.944	10.8009	10.8577	11.1288	10.9429	11.1754	11.2388	11.4472	11.1847	9.99133	9.93822	9.52082	10.3992	10.7622	9.67522	10.0508	9.69158	10.217	10.7061	10.9499
MT4	5.25493	5.25079	5.27448	5.31025	5.97645	5.6687	5.59141	5.27548	5.25567	5.49279	5.55171	5.3772	5.24759	5.86179	5.57773	5.46454	5.87138	5.44767	5.61169	5.53578	5.55733	5.29338	5.42484	5.30106	5.60652	5.38635	5.24946	5.36982	5.34993	5.56336	5.64334	5.15648	5.19785	5.51589	5.84979	5.48407
MTR	7.6833	7.13744	7.76383	7.60993	7.40798	7.39769	7.51702	7.54214	7.70593	7.45017	7.34178	7.33601	7.42056	7.66519	7.43944	6.90238	7.19191	7.00759	7.15749	7.74515	7.5953	7.67917	7.59045	7.48901	7.49885	7.27237	7.05819	6.82339	7.13863	7.7555	7.14364	7.19382	7.12368	7.13502	7.68026	7.52665
MUT	7.89937	7.86631	7.82609	8.22739	7.42777	8.0306	7.56711	7.8572	7.98212	7.71339	7.59268	7.95253	7.8907	7.9117	7.98088	7.00019	7.14181	7.23833	7.08223	8.01438	7.48219	7.89269	7.96001	7.68683	7.86575	6.94958	6.897	6.439	6.57407	7.81238	8.20307	7.92938	7.87144	7.92287	7.73738	7.7268
MVD	5.52574	5.74631	5.24405	5.36819	5.48265	5.60801	5.57864	5.74754	5.20571	5.67825	5.82689	5.702	6.00911	5.30821	5.82032	6.14747	5.89847	5.99118	5.9235	5.26782	5.31281	5.4301	5.35748	5.84906	5.45612	6.27695	6.09725	5.9048	6.91544	5.33311	6.22002	5.91323	6.20004	5.95969	5.05861	5.6457
MVK	6.25693	6.69516	6.36668	6.36914	6.09822	6.5222	6.09198	6.56402	6.37037	6.774	6.58333	6.69527	6.71695	6.39893	6.60866	6.59803	6.47821	6.57829	6.43822	6.34691	6.13735	6.50368	6.11817	6.67059	6.34472	7.05705	6.87926	6.79713	7.14716	6.37978	7.31126	7.15137	7.37343	7.13041	6.10547	6.44712
MVP	9.13195	9.40011	9.31578	9.31123	9.05637	9.55398	9.15559	9.68994	9.21561	8.67177	9.37598	8.48284	8.81871	9.33436	9.46407	9.3453	9.42087	9.10388	9.23605	9.44708	9.34472	9.55826	9.10578	9.6682	9.49332	8.67189	8.72646	8.62262	8.9107	9.20894	8.15778	8.52698	8.08462	8.12212	9.0473	9.26432
MX2	7.92113	7.59165	7.50819	7.52182	8.64004	8.04394	7.71842	7.56662	7.90824	9.14213	8.39001	9.36008	9.29766	7.95874	7.48094	8.05765	7.98306	8.10083	8.14253	7.35761	7.72637	7.49447	7.25339	7.3837	7.40565	8.24013	8.40364	9.0386	7.42924	7.81042	8.36952	8.26361	8.4015	7.88256	8.25715	7.96269
MX1	8.83487	8.82822	8.65301	8.87094	9.03715	8.88561	8.98462	8.53992	9.1897	10.6992	9.83884	10.7935	10.6799	9.27128	8.82101	7.95293	8.0925	8.01051	8.0136	8.61719	8.32386	8.57979	8.62715	8.96214	8.92507	9.83781	10.1579	10.6423	9.0605	9.28591	9.06112	8.75852	9.07694	7.85	9.29613	8.6082
MYC	10.258	8.07353	8.09437	7.79555	11.2636	10.6162	11.0992	8.42926	8.50879	9.5451	9.20616	9.40682	8.8168	9.96609	9.3708	9.26954	9.63425	9.43253	9.38968	8.6614	10.0234	9.034	7.85144	7.37374	9.05856	9.92839	9.83128	9.86473	9.33724	9.13421	10.3038	9.96553	10.2434	9.8437	10.9464	9.08944
MYB	5.10804	7.45381	6.44418	5.53902	5.12448	4.87612	5.26517	5.71183	5.70967	5.88932	5.24142	5.99865	5.77002	5.71774	5.37954	4.39416	5.25764	4.20885	4.39401	5.56674	4.64608	5.51666	5.39809	5.88639	6.20277	6.49202	7.13831	7.35235	4.56753	6.67916	7.33621	6.7684	6.95614	6.45157	6.25809	6.65947
FZD1	7.33533	7.13132	7.43444	7.78332	6.26306	6.64452	7.72002	7.199	7.73774	7.77735	7.04634	8.18302	8.04668	7.31096	6.82255	7.27426	6.6036	7.43959	7.17008	7.38776	7.24463	7.62204	8.05295	7.51011	7.38379	6.34787	6.26937	6.41896	6.94302	7.76744	6.64336	6.88929	6.82583	7.34995	6.45542	7.06974
FZD3	4.19064	4.24509	4.63196	4.54524	3.98097	4.13697	4.11843	4.12508	4.18636	4.29219	4.27322	4.92356	4.56179	4.00206	4.27206	3.7466	4.09508	4.00974	3.69605	4.13465	4.32651	4.20852	4.68233	4.17658	4.5713	4.15221	4.45633	4.68118	3.58021	4.58283	5.614	5.68702	5.84255	5.49929	4.47326	3.8403
FZD2	7.07189	6.75687	7.42115	6.54354	5.36241	6.10457	6.83175	6.56945	7.26703	7.10515	7.00972	7.42614	7.43689	6.44697	6.05145	6.71567	6.9444	6.12716	6.50655	6.41506	7.27372	7.2212	7.54835	6.40874	6.78671	6.68628	6.65849	6.36959	6.79647	6.41506	6.95607	7.07945	6.9354	6.94637	5.95887	6.49622
FZD5	7.44866	6.90099	6.90658	6.90963	6.51461	7.46676	6.4537	6.92228	7.25128	7.08016	6.8961	6.43209	6.08459	6.8253	7.56893	6.47235	6.65573	6.67528	6.66966	7.40096	6.75784	7.31697	7.26031	6.74003	7.08095	7.17047	6.57501	6.06306	7.59804	6.4841	7.16343	6.81392	7.03429	6.84196	6.49752	6.7721
FZD4	8.48782	7.73162	8.55333	8.65297	8.16541	7.84602	8.3792	7.53728	8.52627	6.27368	7.15053	6.15263	6.27014	7.89624	8.6262	7.13111	7.45549	6.57204	7.20817	9.0769	7.91487	8.50274	8.84959	7.96497	8.70582	5.88274	5.84149	6.04244	6.2947	8.27178	6.53119	6.51485	6.21328	6.32005	7.82134	8.28297
FZD7	7.34671	7.31907	7.09865	7.40421	6.27731	6.89588	7.53705	6.94841	7.33501	7.22096	6.97738	7.54029	7.2782	6.88437	7.08659	7.44213	7.56918	8.05717	7.57107	7.78978	7.90907	7.62446	7.54497	7.07618	6.92552	9.05222	8.22816	7.55144	9.11736	7.48191	4.42287	5.88956	4.73415	5.34336	6.8246	6.88637
FZD6	8.69983	8.34258	8.36609	7.79901	8.07406	8.19448	8.19415	8.26008	8.42353	9.44769	8.56248	9.58207	9.64284	7.50109	8.29892	9.0824	8.81374	9.303	9.02112	8.03716	8.0058	8.3064	8.57072	8.04916	8.12604	9.27367	9.56052	9.85266	7.85214	7.58368	9.0148	9.28947	9.35989	9.35451	7.82113	8.01005
LINC-PINT	7.32939	7.70948	7.03847	7.08707	7.91667	8.39755	7.45168	7.35013	7.05768	6.09939	7.04983	6.29619	6.47716	8.8155	7.04011	6.22315	6.69554	6.5281	6.79925	7.57778	7.08245	7.19086	7.39183	6.81719	7.46147	5.96612	6.10796	5.91999	6.30868	7.37635	5.48082	6.06949	5.94966	5.51903	7.86217	7.21037
MACROD1	6.79301	7.2702	6.60717	6.55018	6.56064	6.69443	6.37712	6.67809	6.65727	7.73966	6.64189	6.94496	6.93075	6.32799	6.79573	6.60625	6.05995	6.80167	6.67468	6.54223	6.35448	6.57307	6.63237	6.63031	6.71623	6.09902	6.29714	6.24636	5.81517	6.29344	6.83474	6.50686	6.48988	6.86163	6.24892	6.6182
MACROD2	8.63767	8.63963	6.34653	8.19743	7.13052	9.38823	7.92255	8.57296	7.44958	6.94448	9.0918	5.22118	5.66068	7.9759	8.06862	6.19967	8.02771	5.55229	6.60077	8.7775	8.65016	8.00397	7.83781	8.27562	8.17346	3.29984	4.1725	3.53061	4.31009	7.69134	5.00565	6.17845	4.76315	4.20507	7.69185	7.09422
NBN	6.51634	6.55763	6.81622	6.68974	6.55594	6.6348	6.77896	6.40623	6.99695	7.77683	7.39898	7.62603	7.52119	7.03014	6.65533	6.69832	6.84846	6.46864	6.68901	7.15657	6.8872	6.84644	6.77395	6.64716	6.40277	8.16232	8.14578	7.7099	7.98082	6.55502	7.99929	7.92007	8.01722	8.02843	6.72163	6.399
NCL	9.87896	9.67658	9.61475	9.68934	10.039	9.91206	9.7658	9.80252	9.82598	10.3953	10.1319	10.2321	10.1397	9.78845	9.57933	10.2652	10.2295	10.4431	10.3985	9.87659	10.002	9.8805	9.85726	9.69431	9.82648	10.7859	10.7128	10.7651	10.5824	9.83553	10.7413	10.6526	10.8375	10.6575	9.85581	9.61631
ND6	7.73254	7.79788	8.06758	8.18787	8.30178	7.79569	7.49148	6.75644	7.91976	7.63481	7.15992	7.25399	6.88466	7.41115	7.74347	7.35744	7.29733	7.55292	7.16491	7.64954	7.64583	7.27801	7.8815	6.76385	7.20008	8.26567	8.34371	8.17688	7.46072	7.80139	8.15556	7.9197	7.84324	8.17622	8.29748	6.84176
NDN	9.05064	9.08058	8.95542	8.71325	8.39234	8.48276	9.02799	8.67547	9.04001	8.18886	8.67112	8.60693	8.82066	8.85285	8.65421	8.06802	8.08255	7.67249	7.9772	8.81935	9.16721	9.14156	9.02875	8.59542	8.89261	6.19959	6.61083	6.71918	7.00834	9.07419	6.28498	7.14064	6.4068	6.7131	8.88935	8.75269
NDP	2.65337	2.87789	2.7066	2.55322	2.5441	2.62758	2.93214	2.78877	2.5866	3.00299	2.71299	3.28715	2.80752	3.00799	2.58825	2.7516	2.98115	3.05439	2.87861	2.77904	2.5261	2.61827	2.7128	2.55165	2.58621	2.64987	2.74571	2.82872	2.94739	2.84034	2.46258	2.57403	2.68182	2.61205	3.06956	2.72202
NEB	3.4552	3.52619	3.90146	5.38419	3.51885	3.43625	3.69465	3.46629	4.1078	4.07796	4.02009	4.32277	4.43589	3.66116	3.88271	4.44842	4.07967	4.89206	4.77688	4.42283	4.49493	3.86114	4.28163	3.4264	3.76317	5.59628	5.45714	5.85095	5.27714	4.14153	6.03349	5.78833	6.16795	5.5277	4.68825	3.62135
NF2	6.47918	6.59778	6.42759	6.44177	6.47303	6.4591	6.45496	6.62959	6.32869	7.21725	6.63222	7.02203	7.01723	6.13631	6.5821	7.29668	7.00089	7.25674	7.38809	6.43753	6.54108	6.55046	6.48139	6.64328	6.6821	6.57072	6.80118	6.9938	6.43905	6.39859	6.9196	6.84738	6.84875	6.86273	6.22323	6.46364
NES	7.43353	7.46139	8.06148	8.68025	7.99963	7.55064	8.32175	7.60096	8.16336	6.50625	7.20174	6.32353	6.56339	8.35686	7.76368	6.92116	6.81496	6.64377	6.77021	8.38556	8.11282	7.91767	8.05851	7.57891	7.81716	6.20347	6.25241	6.04382	6.39434	7.80286	6.31412	6.54752	6.41519	6.35078	8.0706	7.67501
NGF	5.24266	4.83621	4.32529	4.61728	4.4401	4.58237	4.50744	4.74166	4.52293	4.75979	4.70573	4.71349	4.94841	4.62123	4.52579	5.04589	5.07218	5.3447	5.2651	4.94144	4.65394	4.65192	4.47015	4.44539	4.62159	5.06329	5.6468	5.66791	5.41064	4.37345	5.11756	4.77802	4.97864	5.14108	4.79227	4.78284
FZR1	5.71577	5.80189	5.2385	5.35331	5.8293	5.68622	5.88826	5.71247	5.52748	5.87129	5.70938	5.72883	5.90219	5.64701	5.60108	5.97211	5.8611	5.87529	5.74676	5.42702	5.6383	5.57235	5.62806	5.8014	5.82008	6.12826	6.08854	6.03697	6.29838	5.5802	5.93323	5.80879	5.90071	6.07809	5.67409	5.72212
NHS	5.03923	4.98625	5.07471	4.62111	4.84039	5.0223	4.93643	4.89406	4.92992	6.45984	5.49747	6.68084	6.44833	4.73042	4.50344	5.55343	5.10721	5.53224	5.38903	4.53997	4.82326	4.46445	4.77301	4.60457	4.80229	4.62777	4.92013	4.76174	4.95486	5.12182	5.83919	5.54946	5.66038	6.17666	5.27343	5.18163
NIN	5.97083	5.72373	5.62013	5.99211	6.13713	6.21476	6.03388	6.01904	5.94095	6.39368	6.462	6.30207	6.43996	6.24934	5.92319	6.61359	6.57654	6.41667	6.79797	5.6332	6.20001	5.95044	5.76074	5.85849	5.78982	5.81779	6.09969	6.09755	6.11641	5.96556	6.16999	6.17997	6.27015	6.14472	6.04116	5.44572
NLK	5.26107	5.44548	5.65466	5.78958	5.63009	5.56714	6.18115	5.21847	5.84472	5.73282	5.46132	5.65366	5.37634	5.3958	5.7922	5.87687	5.67784	6.21846	6.22058	5.47579	5.46761	5.71837	6.01428	5.81034	5.76483	5.92198	6.07039	5.83664	5.62618	5.19436	6.45046	6.33648	6.62547	6.41767	5.23157	5.29115
NLN	4.89411	5.42994	5.05012	5.07908	4.86819	5.26142	5.20369	5.8998	5.40482	6.41615	5.97351	6.20523	6.16948	5.32647	5.58184	6.62996	6.29215	6.64124	6.74546	5.49867	6.49134	5.33553	4.74777	5.57778	5.1433	6.64592	6.80801	6.94633	6.2151	4.98165	7.00918	6.84784	6.96649	7.07386	5.05815	4.96565
NMB	7.10458	7.63541	7.04925	6.74937	6.94601	7.3341	6.66285	7.58524	7.30755	8.09061	7.15832	7.52272	7.63597	6.61434	7.92548	7.95659	7.45359	8.0895	8.29119	6.77939	6.27065	6.57733	6.54435	8.02844	6.76964	7.84488	7.65644	7.87241	8.14159	6.7694	7.40063	7.24227	7.36586	7.97258	6.80814	6.69771
NMI	8.29842	8.39347	8.57588	8.43477	8.08034	8.14382	8.35061	8.91037	8.44474	9.04218	8.61471	8.89907	8.5308	8.51951	8.48184	8.73778	8.5579	8.57316	8.63718	8.4089	8.68619	8.77135	8.06024	8.65247	8.38516	9.46652	9.47108	9.50503	8.92112	8.42582	8.51218	8.57975	8.64994	8.17358	8.08772	8.26748
NMU	3.20679	4.4119	3.55055	3.49686	3.48227	3.83107	3.67414	3.8766	3.41868	6.50001	5.26005	6.88513	7.28299	3.78602	5.41549	6.20875	5.45851	6.35088	6.70647	3.23485	3.77006	3.57195	3.69108	3.49624	3.70367	9.18198	8.56686	8.36372	8.30322	3.42341	8.31132	8.16481	8.77615	7.34277	3.65713	3.70377
NNT	6.2946	6.16873	6.41391	6.411	5.92454	6.51305	6.39754	6.54756	6.92118	7.47507	7.02499	7.83315	7.23621	6.32115	6.86161	6.96476	6.92639	7.16621	7.15492	6.50579	6.64481	6.79085	6.72871	6.66184	6.3126	6.94825	6.83093	6.68134	6.30793	6.20165	7.84714	7.76913	8.12283	7.57624	6.17714	6.13256
NOV	5.45262	5.98861	5.46412	5.71054	6.38362	5.13457	7.51485	6.24148	5.59638	4.37396	4.31067	4.08313	4.33425	5.53992	5.10109	4.70462	4.63439	4.53344	4.59275	5.53173	7.10141	5.08216	5.48105	5.73864	5.77493	6.72562	6.79587	6.60913	5.33998	5.41127	5.27934	5.46317	4.9239	5.36692	5.47752	6.67362
NPB	5.60737	5.71598	5.56934	5.66701	5.631	5.69906	5.99732	5.84626	5.19796	6.24417	6.37952	6.17565	6.35344	5.72472	5.64729	5.86308	5.91976	5.6913	6.00196	5.46013	5.95655	5.50418	5.69779	5.78873	5.5187	6.78058	6.36311	6.20566	6.78645	5.8908	6.17822	6.0863	6.05133	6.26633	5.56418	5.72024
NPL	7.09613	6.67522	6.26935	6.58423	7.29496	7.60303	7.68247	7.6813	7.29162	8.03664	8.77133	8.14575	7.79727	7.93308	7.55612	7.85832	8.50802	8.54747	8.46309	6.54421	9.81088	7.66437	6.39476	7.66477	6.92321	8.57449	8.51301	8.56641	8.16674	7.33364	7.93763	8.63487	8.39409	7.7672	7.15835	7.22591
NPW	2.73732	2.64991	2.586	2.51756	2.57718	2.9112	2.92752	2.80796	2.68855	6.5916	3.45884	4.66472	5.20822	2.70509	2.77533	2.99035	2.77596	2.58882	2.52822	2.57354	2.8098	2.53577	2.55473	2.54516	2.52899	3.21696	3.0798	2.94631	3.35353	2.65805	2.93446	2.85622	2.81339	2.85112	2.49982	2.6233
NRK	4.21617	3.73478	3.76455	4.34335	3.87545	3.68644	3.73974	3.89158	3.63657	3.87142	3.82899	4.59763	5.0119	3.6889	3.96183	4.2137	4.32788	4.43619	4.49472	3.68815	4.82434	3.67961	4.02232	3.70281	3.67478	3.67208	3.6502	3.97952	4.23269	3.489	3.82041	3.76358	3.59688	3.70895	4.11311	3.66967
NRM	7.522	7.70914	7.35624	7.5354	7.34393	7.27799	7.55436	7.78837	7.56713	8.94159	7.93803	8.75855	8.65273	7.63478	7.3664	8.03353	7.62993	7.83495	7.9665	7.45905	7.58499	7.43918	7.59937	7.43553	7.46807	8.02273	7.83874	7.75832	8.10386	7.48238	8.20887	7.99847	8.06356	8.1503	7.34264	7.44953
NTS	4.00787	4.88568	3.84338	2.81679	3.61189	3.33712	3.51792	3.45319	3.04903	10.8487	9.98007	11.3291	11.2253	3.53957	3.2483	3.15744	5.05252	6.10648	4.59352	3.935	4.1052	3.26833	2.98099	2.97108	3.42735	11.743	11.8012	11.9706	10.2176	3.34291	12.4457	12.4203	12.525	12.3377	3.39026	3.62232
NVL	7.09063	7.46657	7.14036	7.0067	6.49205	7.09628	6.76099	7.16161	7.0079	7.56052	6.92077	7.40165	7.18486	6.91744	7.04931	6.94631	6.98759	7.06931	7.19208	7.09796	6.97458	7.01091	6.88421	6.89472	7.08801	7.63278	7.30925	7.39425	7.35153	7.13583	7.58727	7.51362	7.73203	7.42059	7.07639	6.96931
NXN	10.0263	10.011	10.0268	9.57741	9.7786	9.46477	9.61	9.53918	9.96082	9.6664	9.47569	9.97139	10.0045	9.73617	9.48949	10.1168	9.52772	9.98418	10.0487	9.86939	9.76684	9.92279	10.0328	9.17704	9.75167	8.98493	8.92355	8.78213	8.93794	9.32933	10.2885	10.2181	10.2342	10.5113	9.55377	9.77248
NYX	5.06981	5.56999	4.91164	4.84887	5.12984	5.31858	5.13125	5.49763	5.04351	5.41148	5.90779	5.84695	5.99358	4.9446	5.22221	6.01049	5.82984	6.05207	5.20244	4.84554	5.14166	4.92571	4.84502	5.10416	4.90994	6.00733	6.28614	6.27787	6.72965	5.11314	5.97459	5.79618	5.91892	6.06071	5.18947	5.08994
OAF	7.60643	7.33922	7.14166	7.01107	7.37594	7.3505	8.17509	7.72658	6.92958	8.75759	8.38136	8.31429	8.90136	7.57037	6.86165	8.48808	8.27658	8.23856	8.45566	7.31636	8.19196	7.39755	6.79752	7.0401	7.27549	7.64603	7.53637	7.64486	8.19874	7.39532	7.33653	7.48658	7.33612	7.33094	7.41931	8.01316
OAT	9.9269	9.86888	9.64677	9.64454	9.7592	9.80098	9.80098	9.83434	9.90241	10.6174	9.95798	10.2218	9.93274	9.77713	9.64484	9.58374	9.92025	9.63193	9.44916	9.96994	10.0441	10.0057	9.7307	9.38298	9.86077	10.3308	10.4611	10.6195	10.3544	9.91239	9.86703	9.96684	9.95311	9.73829	10.0281	9.64201
IL12RB1	5.07301	5.34222	4.99483	4.89346	4.92509	5.00586	5.16492	5.58756	4.8179	5.3424	5.67617	5.69184	5.80084	5.15951	5.1924	5.74397	5.52665	5.45442	5.62703	4.7813	5.42262	4.88557	5.01763	5.1221	4.9828	5.77553	5.9357	5.83737	6.0826	5.07296	5.42459	5.31396	5.32545	5.24038	5.15582	5.15922
IL12RB2	3.42854	3.31167	3.45914	3.57109	3.70661	3.30012	3.63962	3.61615	3.3606	6.10808	4.52575	5.51011	5.1629	3.52694	3.30672	5.30027	4.34248	4.88242	5.29528	3.33557	3.59796	3.46261	3.16221	3.27317	3.42886	7.28144	6.25891	4.66922	7.2455	3.67209	6.4869	6.06981	6.81221	6.10139	3.67287	3.6251
INO80C	8.1138	8.15934	7.93638	7.92805	7.97206	7.85547	7.8053	7.89948	7.89437	7.79555	7.37271	7.47783	7.28923	7.63257	7.83391	7.36614	7.40845	7.51469	7.534	7.55336	7.65759	7.98589	7.82333	7.59133	7.80577	8.53875	8.53158	8.69294	8.52577	7.59441	8.77405	8.679	8.70467	9.17671	7.70872	7.75448
INO80B	6.11765	6.36874	6.05994	6.15335	6.08231	6.15028	6.494	6.4317	6.01599	6.74138	6.70924	6.45719	6.71042	6.07201	6.3283	6.90356	6.74719	6.98097	6.83984	6.22512	6.244	5.99029	6.08628	6.34792	6.29843	7.18003	7.16774	7.16483	7.21843	5.91782	7.07552	6.69084	6.86462	6.8808	5.84885	6.29497
INO80E	7.75282	7.66043	7.82081	7.74508	7.04524	7.54882	7.78694	7.50191	7.61565	7.60299	7.24359	7.16997	7.30283	7.47432	7.89437	7.70485	7.48128	7.62647	7.79516	7.81214	7.43378	7.55712	7.68112	7.91527	8.01457	7.71822	7.64417	7.68042	7.22817	7.62622	7.51463	7.17944	7.3593	7.45118	7.58143	7.74076
INO80D	6.22497	5.58706	5.89357	5.7862	6.54338	6.12353	6.33153	5.50069	6.19475	5.38493	5.65603	5.51834	5.48099	5.79044	5.83788	5.99363	6.01449	6.40097	6.23028	6.22072	5.56766	5.8225	5.79201	5.93	6.05921	5.74962	5.69406	5.61089	5.73363	6.03672	5.78831	5.53203	5.45442	5.53274	5.95675	5.72734
OGN	8.07109	6.8405	7.531	7.24364	7.86904	6.60692	8.41632	7.41085	6.8747	2.77313	4.44262	2.99258	3.2214	7.44911	6.28241	3.39013	5.10037	2.96541	3.5625	7.72106	8.06755	8.0281	6.94212	6.17693	6.94981	2.74339	3.45677	3.10565	3.20458	7.75536	3.4472	5.20261	2.95219	2.6893	8.03604	8.12328
OGT	7.89087	7.7495	7.89274	7.29511	7.49507	7.97632	7.16078	7.43752	7.27636	6.78612	7.11759	6.75413	7.20712	7.29449	7.23079	6.33056	6.90696	6.27048	6.84746	7.42381	7.63304	7.52625	7.50783	7.49022	7.67763	7.36891	7.12199	6.60731	7.05859	7.93063	6.94902	6.85672	7.03307	6.79816	7.54367	7.57195
SMIM12	8.25444	8.94171	8.25155	8.32776	8.78926	8.59922	8.31602	8.53934	8.44183	8.73393	8.51231	8.55933	8.28363	8.64041	8.28045	8.48202	8.43157	8.44233	8.51469	8.13948	8.73016	8.31342	8.37984	8.28774	8.3229	9.00139	9.15032	9.35678	8.84549	8.26483	9.1132	8.81747	8.94781	8.81741	8.39583	8.3344
SMIM11	5.36836	5.95158	5.45398	5.30253	5.47456	5.55417	5.30568	5.46581	5.73143	6.02384	6.01858	6.3813	5.99761	5.49627	5.63371	5.39017	5.43876	5.59819	5.60247	5.64891	5.6544	5.40128	5.45662	5.51176	5.55705	5.47739	5.50086	5.46341	5.39579	5.47843	5.8331	5.65007	5.78289	5.81621	5.68601	5.43038
SMIM14	7.82997	8.41112	8.35367	8.42923	7.64022	8.04945	8.17946	8.18314	8.16377	7.46952	8.56705	7.49723	7.32072	8.30826	8.33956	7.60142	8.03245	7.78666	7.42009	8.46501	8.13928	8.46478	8.27283	8.4871	8.14781	7.91719	8.34477	8.24243	7.51689	8.00417	7.18268	7.64449	7.40167	7.09745	7.9258	8.34433
SMIM13	3.6507	3.6651	3.80155	3.93016	4.18274	3.68221	4.37165	3.71143	4.03256	6.48453	4.76061	6.4837	5.83349	4.43646	4.12065	4.19149	4.15224	4.26966	4.47503	3.91394	3.77636	3.8865	3.98596	3.66272	3.87741	4.55009	4.40593	4.18031	4.29138	3.50012	5.47942	5.22632	5.50689	5.87383	3.85922	3.44179
SMIM15	8.64212	8.83101	8.94194	8.7747	8.52144	8.76579	8.3983	9.0184	9.04983	8.89131	9.11369	9.07559	8.72974	8.76133	8.80759	9.29735	9.24998	9.44043	9.30085	9.11063	9.03349	8.98379	8.92669	9.21447	8.83251	9.76303	9.88645	10.1863	9.12954	8.81251	9.1635	9.15023	9.26886	8.90466	8.59567	8.68284
SMIM19	8.89619	9.60898	9.06826	8.83986	8.92673	8.81771	8.91948	8.96316	9.34485	9.58781	9.24023	9.68438	9.67313	9.10627	9.16776	8.13386	8.44895	8.32703	8.06294	9.12973	8.87358	9.2074	8.9239	9.35176	9.23537	8.7897	8.83703	8.95662	8.65854	9.11808	9.42441	9.21961	9.39219	9.28044	8.98636	9.07441
SMIM20	7.82321	8.16878	7.96273	7.79526	7.59357	7.73381	7.4911	7.94778	7.89103	7.98444	7.98872	8.10995	7.8266	7.89416	8.01682	7.93547	7.98479	8.06078	8.14956	7.92077	8.1708	7.8876	7.7788	7.93483	7.71871	8.55188	8.59844	8.57426	7.95454	8.0129	7.68053	7.50513	7.50704	7.62625	7.91834	7.89239
SMIM22	5.07682	6.45676	5.52646	5.21481	5.28396	5.84489	4.9095	5.73048	5.11441	6.04074	5.81825	5.43593	5.34326	5.24682	5.47782	6.65174	6.37114	6.66032	6.70629	5.30733	5.41876	5.28236	4.83672	5.46283	5.39937	5.65018	5.12971	5.2095	5.82204	5.31042	4.6665	4.84991	4.5817	4.73468	5.39085	5.61646
OMD	4.67491	4.57646	5.03522	5.55538	5.10363	4.575	5.9711	4.56597	4.32917	3.74071	3.77132	6.17237	6.58124	5.37265	4.24504	4.16172	3.71431	4.3911	4.26451	5.88628	4.13483	5.94048	5.11767	3.92795	4.34542	3.00038	3.25774	3.96295	4.35755	4.82201	2.74023	3.12389	2.67843	2.8008	4.67062	5.54404
OS9	9.2578	9.34093	9.32907	9.39257	9.08999	9.42006	9.57494	9.27711	9.22549	9.36251	9.5651	9.226	9.45445	9.47537	9.33307	9.84014	9.58087	9.99458	9.70848	9.34501	9.29371	9.36035	9.42899	9.72077	9.45009	9.74638	9.55417	9.35933	9.75086	9.42965	9.63058	9.62655	9.54717	9.84166	9.14811	9.44829
OSM	6.06825	5.00613	4.29116	5.12725	6.72797	6.58163	5.10226	5.18414	4.96778	4.98379	5.71558	5.04336	4.98894	5.51032	5.07826	5.63104	5.72488	5.59182	5.48091	4.44205	6.29737	5.17982	4.17486	4.52356	5.23668	5.3977	5.57583	5.26275	5.415	5.55989	5.70911	5.79879	5.45238	5.71359	5.77152	4.82057
PAM	8.75264	8.7733	8.79582	8.83576	8.45501	8.68701	8.63741	8.82121	8.7218	8.57181	8.60675	8.71004	8.84661	8.6497	8.47901	8.53688	8.52125	8.70883	8.57394	8.77716	8.76253	8.629	8.64979	8.58786	8.57678	7.56709	7.71684	7.70059	8.05235	8.37667	8.17706	8.29319	8.09935	8.27145	8.58093	8.70427
PBK	3.01258	3.28385	3.45191	3.2683	2.89065	2.9029	3.23599	3.34781	3.4783	7.7145	5.73671	7.25991	7.0072	3.58919	2.92071	7.07756	6.61292	6.69082	7.38721	2.57624	4.88209	3.1361	3.05795	3.24007	3.00394	8.67338	8.44544	8.32092	7.80606	2.97782	8.88799	8.51379	9.04785	8.24207	3.07106	3.08135
PF4	5.87128	6.10719	6.03217	6.39635	7.34217	7.04445	5.69955	5.49587	5.8141	5.1865	5.28582	4.98895	5.16003	6.83648	6.49062	5.43739	5.37613	5.03268	5.27678	6.12893	5.0152	6.4092	6.27047	5.94915	5.74836	4.85558	5.02775	5.09607	5.08418	5.82943	5.5892	5.58475	5.35114	5.33118	6.00118	5.50553
PGD	8.0089	8.93196	8.70867	8.70008	8.54486	8.81054	8.65095	8.97831	8.79975	9.06544	8.9827	9.05321	8.62216	9.11921	9.59531	9.07685	9.13229	9.33682	9.2533	8.51087	8.68419	8.72281	8.17115	10.0237	8.56568	9.69287	9.86766	10.2078	9.61943	8.21912	9.49607	9.5025	9.84895	8.78011	8.36791	8.94789
PGC	8.89053	10.2562	10.2809	10.3949	9.60368	9.89657	10.1191	10.5663	9.65692	6.27621	8.47185	4.92361	4.97598	10.0872	11.1042	7.07939	8.62159	6.57006	7.69866	10.8447	8.17058	10.5307	9.51454	9.28917	10.6603	5.08527	5.00614	5.09982	5.19637	9.34425	7.80345	7.94753	7.39786	6.26262	9.95795	10.1805
PGF	6.80756	6.28908	6.43062	6.52272	6.35207	6.07492	7.81946	6.36644	6.40594	7.54171	6.98966	7.12488	7.34373	6.52175	6.18669	7.65297	7.19046	7.71354	7.35697	7.12841	7.56348	6.68702	6.11895	6.1564	6.4252	7.00068	6.84826	6.61472	7.10268	6.65376	7.25027	7.27084	7.1416	7.85051	6.68211	6.58017
PGP	6.17051	6.59785	6.27283	6.47223	6.18713	6.56705	6.42681	6.65453	6.35967	7.25516	6.43714	6.91923	6.92747	6.25482	6.58712	6.73373	6.59473	6.48016	6.72343	6.13828	6.27657	6.24519	6.2668	6.69035	6.36972	6.94675	7.05584	7.11091	7.09898	6.34629	6.55168	6.48966	6.57628	6.2018	6.15272	6.4158
PGR	7.39533	5.95088	6.88939	6.97538	6.61119	6.16278	7.49475	6.19801	6.98616	4.3457	5.04301	4.74476	5.18794	6.67675	6.24218	4.3306	4.34387	4.50169	4.40592	6.49882	6.14376	6.76844	7.26461	5.95046	6.46659	3.85345	4.23691	4.16342	4.38972	7.15696	3.57944	4.08384	3.55043	4.05267	6.75269	6.83281
PHB	7.90475	8.48277	8.20292	8.20208	7.76655	7.97799	7.97685	8.05673	8.24117	8.60579	8.11565	8.40028	8.14349	7.99647	8.03435	8.2241	8.02156	8.21408	8.20899	8.13034	8.13104	8.1878	8.00965	8.03939	7.99766	8.50995	8.53127	8.77237	8.18402	7.82435	9.14727	8.80257	9.11673	8.87543	7.86856	7.93729
PI3	5.07155	4.76817	4.20931	4.19064	5.36867	4.83193	4.07752	4.27142	3.93077	6.03423	6.41803	7.38758	8.46744	4.12686	4.78459	10.1703	9.53285	9.43774	9.65487	4.10005	4.51944	4.42249	4.26723	4.41523	4.30423	11.0579	9.88152	9.77988	10.3611	4.11554	5.81844	6.28024	6.00044	6.01619	5.42529	4.1856
PIP	5.00771	8.89105	6.45334	6.19477	6.88193	5.29929	4.81193	6.78991	4.55653	5.72904	6.38282	5.15797	4.82813	5.86681	5.82509	4.79826	6.17685	4.82902	4.87253	5.18424	6.29625	4.53437	4.8671	6.20924	6.37894	4.84857	5.13952	5.12788	5.00393	6.72487	5.09068	5.59222	4.6562	4.76885	8.4516	7.0194
PIR	7.16925	6.7594	6.69634	6.75697	7.05204	6.4614	7.40787	6.50388	6.92897	8.25431	7.15881	8.53549	8.0554	6.29715	7.1005	7.49008	7.31257	8.00742	7.82717	6.32515	7.30311	6.6626	6.72072	6.68168	6.38481	7.68532	8.04787	8.25646	6.96489	6.59247	8.47028	8.43807	8.64351	8.15821	6.22554	6.74478
PKM	7.51779	7.87231	7.82396	7.5543	7.95359	7.92432	8.09208	7.96143	7.21633	8.81686	8.21833	7.93468	8.60043	8.19233	7.89007	9.39125	8.83186	9.49814	9.37685	7.75919	7.64628	7.71145	7.68893	8.5474	8.03495	8.80785	8.51258	8.47223	8.78066	7.79512	9.23433	9.15705	9.34121	9.72294	7.94296	8.10075
PLN	5.18002	6.53594	5.94073	6.47909	6.90269	5.56414	5.84488	6.05501	6.16463	5.5796	5.14187	5.91335	6.35482	6.46746	5.41013	4.35313	4.38528	3.96375	4.16491	6.16289	5.01085	5.39532	5.85958	6.23198	6.21333	3.09677	4.06214	3.34309	5.51412	6.08607	3.21191	4.40303	3.11025	3.52258	6.86825	7.05809
PML	5.892	5.90351	5.94462	6.04253	6.34379	5.6249	6.46387	6.22605	5.99959	6.26531	6.08725	6.05012	6.28019	6.15721	5.96454	6.52977	6.24814	6.47775	6.5609	6.10991	6.117	5.8803	6.06943	6.19484	5.97617	6.56574	6.63429	6.76857	6.31618	6.12282	5.68784	5.73727	5.79072	5.7518	5.94513	5.98186
PNN	8.70947	7.70445	8.72425	8.37578	8.60917	8.2163	8.33652	7.80799	8.38716	8.63234	8.00424	8.08961	7.80026	8.48863	8.1304	7.27039	7.62228	7.37742	7.45745	8.66901	8.21904	8.43492	8.43598	8.11137	8.38086	8.33587	8.15923	7.8795	7.50667	8.8967	8.46413	8.3198	8.47046	8.16857	8.54425	8.06211
PNP	7.76574	8.01986	7.21931	7.83026	10.9716	9.36405	9.09209	8.47134	7.83748	8.69229	7.97083	8.14094	7.95299	9.39413	7.70645	8.11101	8.14237	7.81549	8.11432	7.64154	8.27235	7.79806	7.67613	8.18524	7.65768	8.40787	8.27777	8.69899	8.376	7.31018	8.85848	8.60175	8.66639	8.54506	9.86339	8.15404
POR	8.26672	8.86324	8.51073	8.55082	8.19633	8.74954	8.3929	8.57133	8.41953	8.4261	7.95308	7.83642	8.07335	8.37219	8.65363	8.49594	8.43692	8.63069	8.42435	8.46958	7.85706	8.41023	8.33448	8.99089	8.73363	6.9521	7.22202	7.25856	6.58414	8.04987	8.17611	8.14699	8.26555	8.07406	8.20694	8.66023
PPL	8.90622	9.10895	9.46932	9.24137	8.55013	9.20584	8.37578	9.19095	9.48415	9.31713	8.29407	8.85417	8.95043	8.9394	9.20607	9.27118	8.87904	9.62797	9.44185	10.0364	8.01181	9.41392	9.31353	9.14074	9.43585	9.03483	9.105	9.95894	7.99606	8.94566	6.91905	7.05572	6.76334	5.98712	8.86973	8.94695
PRX	6.76864	7.07273	7.14102	8.83007	7.91668	7.14573	6.46607	6.81614	7.87497	5.77197	6.14679	5.96773	6.00766	7.5866	7.71335	6.07107	5.84924	6.16617	5.93792	7.92174	6.04973	7.24573	8.32625	7.28202	7.81928	6.28731	6.17151	6.19495	6.74053	7.64518	5.85097	6.03354	5.93484	5.90912	7.70438	6.75973
PSD	4.54245	4.94417	4.66583	4.85595	4.90409	4.64695	4.39441	4.93997	4.35488	5.10418	5.32421	5.33319	5.33721	4.57262	4.46377	5.60494	5.14866	5.71661	5.01751	4.6859	5.01144	4.58973	4.42728	4.89382	4.54024	5.63876	5.65817	5.54726	6.14969	4.38509	5.53639	5.20734	5.23942	5.33008	4.66669	4.74833
PTN	7.62569	8.37603	8.00034	8.62707	8.42112	7.33952	8.87234	7.08848	7.88455	7.21826	7.81134	8.74928	8.3748	8.10914	8.26227	7.46182	7.53669	8.27336	7.56062	7.96392	8.16383	7.74987	7.90521	7.63724	8.16712	8.00855	7.98463	7.69177	7.20774	8.29124	8.53714	9.09829	9.38594	8.61543	8.00749	8.03437
PTS	7.62773	7.78838	7.33409	7.40489	7.89985	7.74802	7.52238	7.51087	7.54646	9.30865	8.21846	9.3024	8.93296	7.63551	7.56494	9.70056	9.22714	9.63541	9.66011	7.47855	7.83215	7.53508	7.45947	7.33529	7.53064	8.58413	8.71997	9.07174	8.20521	7.21565	9.75558	9.50476	9.60258	9.59475	7.85748	7.36276
PVR	5.32458	5.29925	5.25994	5.37116	5.68112	5.38269	5.72409	5.56449	5.22034	5.62096	5.44185	5.44587	5.28792	5.63885	5.34018	5.93399	5.63438	5.79756	5.78679	5.54122	5.43668	5.44095	5.39685	5.72622	5.52087	5.45515	5.31332	5.59359	5.6126	5.25218	5.74258	5.81397	5.72173	5.85675	5.28835	5.41404
PXK	6.43772	6.06302	6.55845	7.01167	6.09842	6.51199	6.99965	6.21056	6.71863	5.74479	6.47857	6.01249	5.98844	6.73885	6.80476	6.08712	6.2253	5.75043	6.10307	7.08477	6.62327	6.84694	7.03542	6.72227	6.39159	5.53013	6.0147	6.01326	5.27396	6.90943	5.36711	5.60389	5.45694	5.4463	6.38476	6.04188
PXN	8.72032	8.33565	8.55373	8.56844	8.95212	8.35101	8.41279	8.17436	8.42534	8.22877	8.02444	8.06986	8.04007	8.33123	8.34709	9.16378	8.76111	9.18984	9.26867	8.7633	8.34809	8.43505	8.86119	8.2222	8.57402	7.63177	7.57439	7.7681	7.76913	8.33086	7.4181	7.49425	7.42123	7.81008	8.33716	8.28553
PZP	6.55093	7.22792	6.95796	6.36422	6.44108	5.71561	6.25256	6.72615	5.86542	4.90838	5.92609	4.932	4.7666	6.57379	6.16808	4.94414	5.83331	4.68407	5.00691	6.16953	6.37015	5.59466	6.44583	6.59989	6.47162	4.70119	4.76857	4.79039	4.7338	7.36964	4.67065	5.34528	4.60053	4.51356	7.34521	6.84969
QKI	6.91573	6.52703	7.27536	7.35548	7.0138	6.87572	7.41215	6.46088	7.25525	6.43211	6.90012	6.68074	6.29289	6.92032	7.17046	6.64028	6.61305	6.54703	6.67674	7.31545	7.09123	7.23305	7.24192	7.4515	7.3134	6.41979	6.53723	6.49164	6.35849	6.86035	6.59704	6.37085	6.44438	6.42818	6.74108	6.93038
KEAP1	8.02307	8.32401	8.30309	8.20652	7.78429	8.19871	8.03215	8.32491	8.276	8.33941	8.09271	8.18446	8.05553	8.09487	8.21358	8.11354	8.01424	8.09269	8.17765	7.99703	8.2227	8.31183	8.2735	8.40859	8.21183	9.40203	9.17814	9.12287	8.9001	8.16378	8.37807	8.23232	8.4479	8.10879	7.7859	8.12113
RAN	9.71363	9.90988	9.85609	9.86646	10.154	9.84844	9.91928	9.70134	9.90102	11.414	10.5808	11.2636	10.8268	10.1776	9.77506	10.7656	10.5354	10.6549	10.8337	10.031	10.2241	9.96001	9.62061	9.84292	9.7632	11.0544	11.0702	11.2432	10.5952	9.66171	11.4848	11.1792	11.4683	11.2276	9.96089	9.62585
RB1	6.25109	6.18114	6.5384	6.83407	6.29688	6.35582	6.55318	6.23379	6.44701	5.98856	6.54897	6.22266	6.2174	6.68176	6.47212	6.48796	6.52197	6.52305	6.46544	6.53748	6.90171	6.48737	6.57572	6.3664	6.45567	7.27987	7.17804	6.85098	7.20306	6.49273	6.86584	7.01363	7.00513	7.11383	6.58358	6.11349
RDX	7.42013	7.25676	8.18252	7.77985	6.96469	6.98529	7.59733	6.72028	7.72395	7.08247	6.71646	7.13887	6.38036	7.82298	7.38681	6.8932	6.80082	7.10853	7.11465	8.04563	7.1264	7.83576	7.84999	7.91077	7.62637	5.6188	5.55881	5.54663	5.7185	7.36902	6.95598	6.75426	6.90264	6.92476	7.04953	7.23667
REL	7.55565	5.4516	6.39724	6.42134	8.8015	7.61284	7.70495	5.98933	6.9482	6.98004	7.26031	6.75416	6.66122	7.87895	7.39547	7.56912	7.70741	7.79592	7.64161	6.89463	6.99462	6.91433	6.53614	6.94018	7.1397	7.14533	6.96849	6.78583	6.6616	6.54316	6.81239	7.13366	7.04612	7.66678	7.87766	6.79153
RET	4.22839	4.58716	4.17752	4.34736	4.74868	4.36741	4.70174	4.58059	4.28929	4.68891	4.56303	4.72364	4.73519	4.48846	4.31544	4.70217	4.48549	4.68189	4.80929	4.22098	4.47567	4.48161	4.1435	4.59822	4.49999	4.92826	4.57275	4.83261	4.869	4.63683	4.66672	4.42237	4.57508	4.72901	4.43037	4.67724
RFK	7.0767	7.16134	6.93076	6.64739	6.65258	6.87197	7.10333	7.08288	7.24893	7.19266	7.06128	7.00164	6.94599	6.85114	6.62327	6.44602	6.95153	6.19366	6.46881	6.97888	7.52044	7.24027	6.67479	6.80874	6.8154	6.81298	6.88089	6.79501	6.86752	6.57068	6.69391	6.68407	6.6295	6.43554	7.05062	6.94838
RGN	7.67718	7.98982	6.9296	7.90376	7.95669	7.69145	7.77686	7.31303	7.42373	6.26812	6.61227	6.56475	6.44095	7.61532	7.41678	5.12162	5.36138	5.01628	5.29844	7.4777	7.71028	7.33387	7.7964	7.32594	7.08614	5.23755	5.04178	5.20351	5.52956	7.75832	6.84267	6.4429	6.70574	6.2743	7.99732	7.55104
RHD	5.19246	5.64813	4.69643	4.91832	5.31284	5.04014	4.98346	5.15978	4.81214	5.39605	5.35387	5.70888	5.66005	5.10763	5.14614	5.15649	5.22736	5.17101	5.30252	4.86727	5.13235	4.86873	4.80599	5.04179	4.94783	5.0823	5.21363	5.19549	5.26426	4.96804	5.07622	5.11994	4.92761	5.33201	4.69914	5.34244
RLF	7.18065	6.83431	6.91424	6.53895	7.73263	7.01469	7.40813	6.64016	6.85764	7.55969	7.20132	7.41211	7.56894	7.38502	6.89817	7.14507	6.94777	7.15931	7.11478	6.93986	7.11013	7.06702	7.12886	6.59716	7.00533	7.10046	7.17774	7.22881	7.12076	7.29596	8.20549	8.44845	8.45741	8.82683	7.67761	6.99513
RAD51AP1	4.03197	4.76095	4.38386	4.36102	3.6463	3.79476	4.21499	4.72692	4.70858	7.66455	6.14829	7.50273	7.40683	4.34351	4.51516	5.86897	5.71615	5.44003	5.99198	3.63125	5.40335	4.35953	4.38325	4.6005	4.05135	7.85095	7.65402	7.32991	6.67905	4.42038	7.9424	7.72704	8.03445	7.3112	4.18889	4.28058
DALRD3	7.23674	8.14592	7.74767	7.48808	7.03351	7.27799	7.32934	7.75985	7.36269	7.2247	7.41788	7.09823	7.24	7.46921	7.27832	7.71875	7.65511	7.77814	7.59099	7.26895	7.54456	7.36888	7.53039	7.63991	7.63674	6.77911	6.84368	6.70323	6.85293	7.33669	8.11225	8.06412	8.12947	8.12951	7.43204	7.54656
RP2	6.27639	6.62541	6.18537	6.16137	6.61208	6.35457	6.38379	6.77719	6.20237	6.56618	6.62691	6.14695	6.31759	6.43215	6.37562	5.8521	6.22233	6.00833	5.54168	6.05201	6.6088	6.34837	6.29657	6.28765	5.92815	5.2287	5.82147	5.37156	5.15905	5.34701	6.01878	6.83021	6.36251	6.75323	6.1963	5.94734
RP9	6.72158	7.07995	7.22293	6.9251	6.36244	6.50933	6.39834	6.81834	6.93677	7.21763	7.08311	7.41898	7.28829	6.86419	6.81835	6.77115	6.64818	6.80613	6.73129	7.06135	6.83188	6.92635	7.03302	6.94445	6.70773	7.96043	7.84783	7.9173	7.0628	6.86889	7.2584	7.34704	7.46344	7.66622	5.94769	6.50125
RPE	5.67393	5.88776	6.0437	6.07323	5.64593	5.92175	6.26376	5.94409	6.22957	6.43917	6.28787	6.31414	5.92151	6.04242	6.04047	7.18693	6.69116	7.35463	7.2798	6.29921	6.61998	6.13457	6.04094	6.26821	5.77859	6.25087	6.1841	6.14566	6.01596	5.84052	6.85824	6.89051	6.99336	6.93553	5.78573	5.8663
RYK	7.41158	7.42021	7.43187	7.32369	7.05303	7.33518	7.38393	7.19189	7.4327	7.8104	7.3178	7.52718	7.51788	7.0771	7.19699	8.15183	7.70929	8.31985	8.18816	7.34666	7.27868	7.50175	7.58956	7.21441	7.17037	7.90889	7.73609	7.35263	7.60776	7.25754	8.33656	8.31088	8.36919	8.63748	7.05404	7.12991
SCD	7.0457	7.85602	7.2018	7.59441	6.73315	7.48788	6.97825	7.70436	7.39103	7.47296	7.56113	7.16258	6.92034	7.02625	7.99456	7.0985	7.0112	7.07746	7.31317	7.42867	7.72324	7.84407	7.20653	8.55679	7.4295	8.82407	8.35877	8.06233	8.69773	6.93207	8.71665	8.73921	8.81227	8.8925	6.58197	7.83813
SCT	3.98441	4.07561	3.74702	3.85119	3.78072	4.17287	4.16962	4.37332	5.41186	4.97768	5.14207	5.03929	5.3443	3.85316	6.72551	5.6025	5.14309	5.544	4.75083	3.76533	4.29959	4.05067	3.89856	4.38851	3.69353	5.33842	5.5918	5.52079	5.90505	3.8172	4.9319	5.16637	4.93967	5.24094	4.00803	3.83587
SDS	6.14579	4.96025	5.20474	5.25629	7.11101	6.48998	7.19335	6.02297	6.1473	7.35224	8.0376	6.73119	6.5917	7.42539	5.97382	5.52821	7.06147	5.65036	5.91161	5.0299	8.30555	6.36826	5.48877	5.62578	5.68665	6.74748	7.11779	7.5516	7.07237	6.7576	6.95753	7.44536	7.13387	6.0372	6.17728	6.26752
SF1	8.86324	8.02363	9.05585	8.81975	8.95104	9.02854	8.79384	7.81994	8.98537	7.78361	7.8984	7.6852	7.75088	8.65166	8.51624	7.67244	7.97121	7.9306	7.99519	9.20574	8.41779	8.64695	8.68976	8.4727	8.82491	7.53573	7.52868	7.29139	6.85833	8.8231	7.63903	7.43631	7.74254	7.52382	8.91419	8.65735
SET	9.64781	9.68381	9.76339	9.72395	9.7362	9.92888	9.78285	9.46374	9.71611	10.2251	10.2649	10.2913	10.1055	9.66761	9.71748	9.86119	9.962	9.75382	9.927	9.67237	9.97844	9.71476	9.77439	9.74098	9.74184	10.9854	10.8964	10.7682	10.8953	9.62309	10.4107	10.0862	10.2707	10.1167	9.60285	9.63323
SFN	9.31936	10.5585	8.72633	9.52819	12.0921	10.9094	9.28595	10.7641	9.20948	12.3696	11.2956	12.0059	11.8972	10.9255	9.82162	12.6876	12.354	12.7571	12.8054	9.57252	9.89593	8.5186	6.92165	10.1176	8.9384	12.6547	12.4109	12.5663	12.3089	9.08982	12.1039	12.0461	12.0783	12.2694	10.3167	10.0719
SHB	6.47691	6.52846	6.38413	6.30877	7.43457	6.44555	6.77079	6.55843	6.4422	6.41175	6.22759	6.05702	6.40068	6.51522	6.6222	6.89902	6.71146	6.86921	6.91236	6.31191	6.04971	6.51191	6.44093	6.73998	6.7396	5.63888	5.50924	5.65579	5.69628	6.11783	7.02349	6.76278	6.68032	7.26359	6.19188	6.36638
SHF	5.0865	5.24484	4.90794	4.88878	5.54278	5.04083	5.2346	4.84153	5.15016	5.39965	5.29595	5.32142	5.58332	4.95182	5.05275	5.30356	5.14297	5.09488	5.30518	4.79872	5.30502	5.08092	5.2095	4.89176	4.96508	5.17341	5.07319	5.19923	5.10987	4.94299	5.30526	5.12917	5.1511	5.54027	4.99606	4.99974
SHE	8.34739	8.08078	7.97315	8.35582	7.42873	7.93404	7.64394	7.92858	8.26527	5.89987	6.69564	5.68326	5.83168	7.43016	8.09935	5.42311	6.09124	5.23161	5.48059	7.85912	7.75183	8.31203	8.37662	8.15155	8.09738	5.14867	5.21088	5.27478	5.34515	7.90895	5.55976	5.74358	5.41496	5.06944	7.86542	7.76041
SHH	5.73334	5.57427	5.88546	5.74567	6.22534	5.49273	4.97621	5.71144	5.42296	5.03307	5.20975	5.04793	5.08874	5.46383	5.61517	4.92215	5.07081	5.12799	4.787	5.3663	5.2228	5.62564	5.60735	5.62785	5.77251	5.16753	5.08503	5.10275	5.33141	5.43531	6.06555	6.20928	6.14012	6.1555	5.03906	5.40767
MMP25	5.35042	5.08237	4.71345	5.13951	6.15965	5.58596	5.02883	5.36694	5.04899	5.26839	5.51871	5.44906	5.49411	5.03625	5.17311	5.73721	5.50684	5.41893	5.33259	5.34616	5.23295	5.16383	5.05461	5.10266	4.81058	5.62808	5.72734	5.83457	5.70993	5.08213	5.51031	5.65202	5.31904	5.31912	5.40507	5.19436
MMP24	6.13886	6.04354	5.87279	5.98997	5.58113	6.08778	5.77126	6.3678	6.08867	5.12368	5.83378	5.13426	5.21835	5.87948	6.01942	5.14337	5.36879	5.40674	5.06747	5.81428	5.57951	5.95974	5.93959	5.6998	5.88772	5.39863	5.3185	5.3521	5.44663	5.58023	5.20216	5.25198	5.16723	5.15012	5.56485	6.09694
MMP28	7.43612	7.73622	7.66472	7.61619	6.93893	7.68992	7.12361	7.4257	7.63015	5.51938	6.41307	5.37159	5.38359	7.2722	7.64472	5.68902	5.65609	5.331	5.63396	7.87998	6.7627	7.56723	7.82536	7.65868	7.58578	5.35521	4.90762	4.74934	5.34089	6.83807	4.50371	5.02986	4.6836	4.34846	6.68453	7.30497
MMP10	4.12051	4.22239	2.8456	3.13952	5.85908	4.22995	3.74626	3.29465	3.0681	9.08986	7.51222	9.56558	9.98408	3.61903	3.39927	8.23565	9.73839	9.04473	7.47961	3.03195	3.40575	3.1566	3.16044	3.27069	3.22565	3.44717	4.35391	4.31859	4.21033	3.36868	11.2146	11.0462	10.8485	12.489	4.55075	3.52704
MMP12	4.80427	3.26616	5.56376	2.8808	6.55937	4.33854	2.80499	4.97705	2.67372	11.2826	10.163	10.6185	10.4228	3.55369	4.5925	10.7465	9.68999	11.2485	9.97835	2.7901	6.38268	2.73461	2.77061	4.86309	4.6657	10.9862	10.1872	10.2279	10.8326	6.08134	9.17252	9.70276	9.71698	11.3063	3.53788	3.33094
MMP11	5.20337	5.32625	5.02586	5.12793	5.46061	5.34811	5.16739	5.56463	5.13658	5.89121	5.61544	6.7964	6.84397	5.18348	5.37987	6.70771	5.70584	7.59082	6.1231	4.91337	5.22335	5.36993	5.06762	5.26284	5.35898	5.75102	5.90488	6.04584	6.33955	5.05716	5.83638	5.63857	5.7521	5.8682	5.49597	5.16704
MMP14	6.32945	6.04375	6.01316	5.65136	5.63548	5.72875	6.90554	6.10421	6.0487	8.02576	7.44011	7.68343	7.80751	6.30393	6.26743	8.69775	7.88975	8.51473	8.23598	5.88458	7.13052	6.36119	5.62205	6.49793	6.14543	7.35294	7.30906	7.12432	7.92181	6.24934	7.45611	7.4684	7.48617	7.86297	6.33448	6.1049
MMP13	3.3224	3.51288	2.94005	3.00189	3.81505	3.11352	3.1317	4.31075	2.94994	5.40106	6.20535	8.07744	8.82135	3.13242	3.11664	6.38648	5.53349	6.51008	6.29833	3.09852	3.49564	2.98758	2.98844	3.10312	3.34964	3.45031	3.51561	3.75203	3.89311	3.33553	5.01392	4.29993	4.84006	6.1556	3.56419	3.25266
MMP16	5.07613	3.88766	3.99945	3.86495	3.97427	3.86928	5.29357	4.02458	3.40774	4.53947	5.25418	4.45626	4.71886	3.95447	4.08235	4.88046	4.55958	5.19237	5.10406	3.89646	5.96258	3.97812	3.85111	3.78811	3.57202	4.01556	3.67568	3.90361	3.91998	4.12542	3.67059	3.99558	3.72664	3.72124	4.8745	4.71298
MMP15	7.1603	6.667	7.1272	6.46637	6.14803	6.71388	7.54234	6.7733	6.74082	6.28092	6.56141	5.87919	6.21284	6.05432	6.91861	6.99537	6.68032	6.72225	6.79591	5.9697	6.96393	6.70115	6.72393	6.81638	6.73716	5.97867	6.01035	5.97231	6.6299	6.41277	6.25148	6.15009	6.02907	5.93465	5.99747	6.7638
MMP17	5.56557	5.69016	5.07805	5.13695	5.22151	5.4639	5.66937	5.64034	5.35605	5.45399	5.71744	5.44773	5.88013	5.31847	5.35433	5.80221	5.64817	5.57412	5.46847	5.13018	5.63776	5.03088	4.96027	5.62819	5.43074	5.39507	5.45649	5.5113	6.14667	5.2647	5.30857	5.26962	5.29221	5.26174	5.1293	5.49436
MMP19	8.19791	6.72248	6.84909	6.52224	9.18074	8.65709	9.10254	7.07496	6.98641	6.37264	6.95168	6.70523	6.77336	8.01418	8.31777	6.89904	7.16131	6.97725	7.33964	7.62723	7.77879	7.36048	6.453	7.09834	8.13985	5.82525	5.91698	6.0641	6.4044	7.14692	5.92767	6.44986	6.18793	6.0148	9.14944	7.76109
BBOX1	3.13353	4.44598	2.95605	3.30892	3.11423	2.86245	3.07366	3.5604	3.18552	7.23012	4.71632	7.09584	7.28097	3.18423	2.9498	5.036	5.18418	5.54597	5.4535	3.0433	5.60782	2.93992	3.24337	2.98253	3.15141	3.66812	3.49799	3.83892	3.71489	3.47468	4.09827	4.47624	3.90884	5.80626	3.78991	3.34603
SKI	8.22575	8.12034	8.44529	8.55978	8.43783	8.26115	8.73779	8.10017	8.33964	7.79655	7.66937	7.46626	7.70893	8.31585	8.29422	7.60513	7.62319	7.44017	7.49733	8.39163	8.10736	8.22508	8.37188	8.16616	8.2529	7.07601	7.24763	7.06198	6.73323	8.00425	7.04495	6.98394	6.67193	7.06433	8.27175	8.22007
SLA	7.02317	8.14498	7.59795	8.12192	7.90275	8.13779	7.67535	7.80099	7.95859	7.68973	8.67766	8.10917	8.01112	8.68189	8.0207	7.96596	8.64528	7.31108	7.80457	8.24049	7.78189	7.5512	7.64538	8.40639	7.91246	7.09171	7.4807	7.35907	7.32916	7.65914	6.43127	7.09921	6.74304	6.1603	7.95265	8.15247
SLK	8.46989	7.68635	8.33528	8.75233	9.06064	8.46848	8.45632	8.18371	8.42035	8.38784	7.75172	7.65013	7.64354	8.39754	8.26246	7.57095	7.6931	7.79467	7.53188	8.4461	7.90893	8.29582	8.50165	8.20016	8.35615	8.04742	7.91635	8.07755	7.22173	8.38372	8.84322	8.60077	8.55717	8.8714	8.41358	7.87395
SLN	7.06163	6.72053	5.55285	6.68852	5.58572	5.29686	4.68243	5.38162	4.66436	6.71476	5.46635	6.14531	6.19523	7.83986	4.6485	5.03332	5.27712	4.81918	4.97423	6.89811	5.98438	4.97355	4.53925	4.48737	4.46315	4.51268	4.33292	4.39117	4.6407	5.24332	4.89883	5.21454	4.4349	6.0642	6.6126	5.52331
NUTF2 /// NUTF2P4	7.87981	8.23886	8.15998	7.63918	7.84046	7.8734	8.09315	7.87446	7.81132	8.47136	8.09805	8.21494	8.32035	7.65426	7.82012	8.47966	8.31088	8.16808	8.30273	7.68861	8.06024	7.83524	7.88185	7.8643	7.82389	7.9047	7.77138	7.79605	8.07421	7.5518	8.31299	8.11151	8.17904	8.15034	7.75236	7.81219
SMO	5.70405	5.47555	5.74015	5.38441	5.48885	5.6493	6.0237	5.67371	5.62016	6.2472	6.36334	6.60849	6.64799	5.58711	5.45898	6.89425	6.39596	6.92949	6.85651	5.48869	6.10916	5.54614	5.47396	5.64259	5.61359	6.43916	6.2898	6.69627	6.35162	5.70848	6.72013	6.66261	6.8605	6.60882	5.65136	5.662
SMS	8.43151	8.32759	8.22472	8.05257	8.81847	8.58619	8.2761	8.55397	8.47261	10.1903	9.42651	10.1172	9.77907	8.34654	8.46574	9.26195	9.1998	9.7315	9.34763	8.24587	8.92084	8.3207	8.26571	8.25106	8.22789	8.71578	9.00739	8.92357	8.35487	8.21022	10.8316	10.5262	10.6301	11.0027	8.27031	8.14208
SNN	8.20947	7.72453	8.25282	8.34953	9.01695	8.14689	8.29659	8.00983	8.26143	8.17461	7.99689	8.02914	7.61548	8.17891	7.9768	7.93319	7.90399	8.08108	7.92686	8.11242	8.45238	8.43349	8.25289	7.9899	8.07382	7.18048	7.41021	7.5783	7.00671	8.25722	7.29332	7.20844	7.08789	7.09868	8.43609	7.88532
SON	10.0402	9.52284	10.1182	10.1775	10.0139	9.93683	9.87881	9.86132	10.0444	9.46732	9.64041	9.49693	9.41769	9.96186	9.91891	9.36906	9.55686	9.38898	9.48767	10.1089	9.81691	10.1229	10.0772	9.9901	10.0598	9.07991	9.23766	9.32762	8.82438	10.1814	9.47435	9.45232	9.55722	9.30317	10.0981	9.93133
SP2	7.6301	7.7237	7.73874	7.8085	7.92186	7.50918	7.62195	7.96094	7.50315	7.49985	7.4892	7.50009	7.42805	7.71246	7.72938	6.67044	6.83127	6.38673	6.6073	7.53557	7.59472	7.65829	7.76774	7.33122	7.60917	7.23205	7.18969	7.20618	6.70854	7.7277	7.00732	7.34929	7.09744	7.19129	7.7238	7.69396
SP1	8.68981	8.41145	8.50968	8.45067	8.1386	8.2153	8.60313	8.13962	8.32551	8.31195	8.07136	8.22381	8.19765	8.05431	8.36007	7.92894	7.96959	8.10092	8.02644	8.21831	8.15077	8.40184	8.53601	8.45376	8.31124	8.36606	8.2126	7.87952	8.25004	8.27588	8.16033	8.05613	8.10124	8.17024	8.3998	8.3109
SP4	7.11585	6.44838	6.70698	6.99469	6.85997	6.87874	6.76262	6.78805	6.71942	6.45297	6.87356	6.74292	6.82837	6.97697	6.85176	5.71989	6.22456	5.96659	6.12556	6.5543	6.65594	6.73823	7.00131	6.70728	6.62979	6.81515	7.02342	7.03503	6.19841	6.92515	6.64768	6.72589	6.7805	6.78492	7.08231	6.47225
SP3	7.04957	6.70281	6.52236	6.81757	7.01268	6.71907	6.89805	7.16405	6.8018	6.71714	6.6473	6.41985	6.62039	6.64596	6.64903	6.77145	6.88124	6.63615	6.65023	6.84409	6.5481	7.0539	6.82552	6.66893	6.89603	6.39115	6.88867	6.65617	6.28619	7.00265	6.58346	6.65318	6.65754	6.67797	6.95088	6.63523
SP6	5.04449	5.09608	4.97491	4.83674	5.20313	5.06827	4.82093	5.18235	5.18475	5.76697	5.58611	6.45967	6.68402	5.01735	5.30176	6.0772	5.68088	6.02287	6.07345	5.85895	5.29956	5.0986	5.1228	5.30835	5.345	5.44502	5.59552	5.45227	6.04428	4.97163	5.39983	5.0128	5.26882	5.34785	4.77802	5.26352
SP5	5.05608	5.59611	5.01107	5.24958	4.52586	4.61987	4.50896	5.58814	5.25433	4.72193	5.03441	4.88768	5.14131	4.57195	5.05532	5.27279	4.78868	5.17998	5.07763	5.01389	5.09084	5.22988	5.16382	5.205	4.87287	5.00056	4.75536	5.17598	5.42993	5.17898	5.17897	5.16111	5.01718	4.92508	4.71391	4.98216
SPR	7.5843	8.26375	7.626	7.52704	7.27737	7.85932	7.52585	7.95073	7.51871	7.94646	7.68098	7.67997	7.59458	7.37145	7.80624	7.72237	7.54145	7.80995	7.76921	7.40342	7.51305	7.52625	7.61881	8.00612	7.73259	8.62358	8.40773	8.55362	8.22746	7.30543	8.28178	8.0942	8.33119	8.05086	7.40764	7.73846
SPX	4.26019	4.41474	4.49947	4.28633	4.24058	4.05059	4.04954	4.04305	4.80964	3.97217	4.31767	4.6165	4.48806	4.25683	3.95819	3.85675	3.6362	3.67409	3.67575	4.69168	4.18816	4.25192	5.10119	4.07873	4.44043	3.65984	3.78017	3.71477	3.8937	5.23652	3.82596	3.68716	3.6149	3.69302	4.37971	4.12938
SRC	6.23915	6.64227	6.51808	6.4458	6.6151	6.90802	6.78647	6.47587	6.38757	6.89632	6.24403	6.35424	6.43967	6.15249	6.63902	6.57148	6.39926	6.61401	6.60762	6.18583	6.44803	6.61625	6.26656	6.861	6.50108	6.20539	6.23776	5.95112	6.14047	6.14181	6.30961	6.2411	6.46812	6.37457	6.24124	6.48772
SRF	6.66717	5.76487	6.01746	6.07927	6.7711	6.5124	6.82055	6.11881	6.44265	6.44308	6.21775	6.37201	6.40335	6.05897	6.49624	6.41669	6.2451	6.54392	6.44463	5.92326	6.10321	6.23569	6.22368	6.16531	6.41841	6.52178	6.40915	6.33401	6.59217	5.88547	6.7876	6.49828	6.58193	6.53939	6.68972	6.12465
SRI	8.83779	9.57039	9.17211	8.93804	8.75353	8.81201	8.76992	8.86146	9.07278	8.18234	8.50324	8.48674	8.22017	8.87824	8.78943	8.00995	8.37947	7.8732	8.02427	9.14938	8.77428	8.912	9.07689	8.92	9.08447	7.05777	7.39703	7.16389	7.35212	9.01369	8.21646	8.33332	8.37607	8.43673	9.03317	8.80794
SRL	5.3569	5.54015	5.5918	5.41719	5.72968	5.53722	5.49391	5.73012	5.25362	5.52291	5.73691	5.7416	5.90323	5.40273	5.32622	6.02631	5.7412	6.10608	5.88613	5.37166	5.60245	5.37817	5.43564	5.6298	5.5187	5.8199	5.93965	5.89243	6.27791	5.35924	5.68924	5.79882	5.54296	5.69438	5.52222	5.77421
SRM	7.49369	8.19456	7.29077	7.351	7.56212	7.82452	8.09139	8.216	7.64386	8.90488	8.79931	8.66619	9.17015	7.51178	7.76516	9.63714	9.50319	9.28423	9.57889	7.82637	8.62101	7.83121	7.40283	8.15012	7.74	9.13492	9.24563	9.41176	9.27813	7.56948	9.29638	9.17269	9.41744	9.13216	7.61937	7.59799
SRR	5.27634	5.98203	5.8208	5.77312	5.32831	4.96488	5.19064	5.12216	5.49421	4.63089	4.59641	4.74072	4.59853	5.09549	5.51189	4.36141	4.42633	3.54524	4.14508	5.32282	6.02676	4.8428	4.94736	5.8874	5.60865	3.85408	4.02823	4.26854	3.82798	5.05775	5.03059	4.83915	5.07369	4.60753	4.91955	5.49203
SSB	8.43144	8.51562	8.61485	8.45117	8.62945	8.44074	8.32688	8.46065	8.60296	8.80989	8.74483	8.67351	8.48914	8.48191	8.40275	9.27613	9.11073	9.41097	9.249	8.82588	8.76322	8.5394	8.45122	8.53094	8.47306	9.11059	9.12635	9.04008	8.68453	8.36232	9.68086	9.44978	9.6065	9.43555	8.64728	8.11755
ST5	8.19659	8.19931	8.16545	8.2147	8.77357	8.06533	8.33477	7.8817	7.77492	7.6837	7.68413	7.73101	7.93147	8.03221	8.10993	7.97887	7.89397	7.75055	7.84152	8.03434	8.03712	8.12771	8.4199	8.16547	8.50042	7.12439	7.24899	7.22095	7.17734	8.24621	7.76862	7.62834	7.77222	7.7167	8.1304	8.03968
SST	3.77984	3.77739	3.59286	3.34884	3.91859	4.1184	3.63556	3.84174	3.46565	3.74737	3.9722	4.0568	3.81716	3.65334	3.60052	3.79227	3.87584	3.82658	3.88462	3.55375	4.03273	3.56864	3.30296	3.54794	3.7387	3.86919	3.9325	4.86941	4.16379	3.6992	4.06768	4.02582	3.75109	3.93019	3.97719	3.71978
STS	6.32145	5.96205	6.62385	5.96737	5.7439	5.70158	5.94157	6.3851	5.96434	5.10221	6.20864	4.95851	5.08754	6.20257	5.86767	5.23464	5.83052	5.08764	5.02118	6.03102	6.36314	6.11902	6.51101	6.14354	5.9703	4.54776	4.72348	4.69663	4.94284	5.73512	4.8583	5.22061	4.93512	4.44941	5.95206	5.79344
SYK	7.39015	7.94802	8.05921	8.02937	7.46548	8.24605	7.69507	8.06845	8.10021	7.64434	8.5703	7.83271	7.71331	7.94261	8.01716	7.13314	7.94272	6.68885	7.05326	7.83261	8.09192	7.68168	7.30401	8.11293	7.58328	7.71643	7.71808	7.6429	8.11488	7.60648	6.16469	6.92124	6.65356	6.25744	7.59699	7.97472
GAB1	7.48025	6.89905	7.61638	7.409	6.08375	6.84446	7.57609	6.70191	7.42725	5.77441	6.39441	6.1671	6.11202	7.30329	7.21091	6.219	6.36318	6.68798	6.54048	7.6271	6.84193	7.3518	7.77806	7.22815	7.42681	4.35493	4.74698	4.70232	4.92752	7.29289	5.08436	5.31839	5.1872	5.15566	6.73954	6.89874
GAB3	7.08434	6.90554	7.26344	7.17085	7.09856	7.05103	6.98932	7.37381	7.01099	5.82503	6.75919	6.09481	6.35713	7.10125	7.04868	6.41581	6.79224	5.77713	6.35813	6.86798	7.07521	7.2826	7.24344	6.96176	7.10019	5.59188	6.20185	6.0607	6.07558	7.24959	4.80642	5.73762	5.22673	4.91519	6.90113	7.24029
GAB2	8.68422	7.89915	8.23537	8.33892	8.32415	8.50127	8.43499	8.32305	8.33831	6.91837	7.70901	6.70611	6.82859	7.99482	8.34714	7.06378	7.45003	6.60454	6.82712	8.24339	8.11552	8.33614	8.58207	8.21456	8.37445	7.08439	7.14358	7.02886	6.92382	8.18557	6.23744	6.62964	6.15452	6.25713	8.23965	8.32198
SYP	4.63177	5.01273	4.33711	4.46733	4.80102	4.74731	4.45986	4.75532	4.33253	4.58422	4.7705	4.6482	4.73066	4.48535	4.60775	5.04311	4.51821	5.03771	4.69339	4.58094	4.38495	4.50182	4.47114	4.59591	4.48596	5.0804	4.98242	4.94992	5.29706	4.52785	5.31355	5.07538	5.35661	5.12098	4.65997	4.61416
GAD1	3.43685	3.86441	3.43241	3.30172	3.40492	3.59138	3.43141	3.63446	3.57015	5.68604	4.40992	5.45843	5.52641	3.54549	3.34066	4.11997	3.9568	4.3621	3.99678	3.3527	3.41716	3.24318	3.1776	3.60729	3.441	4.10461	3.97333	4.23433	4.26308	3.35214	5.17631	5.51583	5.80265	6.00988	3.63897	3.69555
TAZ	6.67692	6.86213	6.58807	6.70475	6.76697	6.71918	6.77888	6.76128	6.67567	6.61666	6.48488	6.57165	6.72023	6.59372	6.67554	6.73009	6.64596	6.82165	6.86116	6.72728	6.6107	6.82182	6.76865	6.87169	6.75066	6.29756	6.37905	6.48458	6.29621	6.80891	6.45756	6.44125	6.57106	6.56998	6.66475	7.0017
TBP	7.10162	6.92129	6.84471	6.85257	6.6026	6.79989	6.67182	6.79183	7.07506	6.74107	6.3925	6.61084	6.63729	6.62796	6.7411	6.85233	6.75343	6.98911	7.08363	6.80126	6.59229	6.83671	6.96655	6.92598	6.84895	6.74484	6.7611	7.02551	6.29944	6.91924	7.64087	7.01222	7.33157	7.47732	6.77638	6.70137
GALT	7.7069	7.90735	7.70736	7.70757	7.10432	7.51017	7.41376	7.61843	7.79078	6.52458	6.82583	6.34456	6.61913	7.23161	7.52997	7.1867	6.87358	7.0771	7.00133	7.36516	7.26447	7.74105	7.66783	7.59216	7.54088	6.77569	6.67075	6.61014	6.62149	7.83299	7.91278	7.62928	7.69464	7.66543	7.45797	7.70208
TDG	8.5179	8.33641	8.27918	8.11338	8.85689	8.44749	8.29622	8.18898	8.1874	9.566	8.50187	9.35017	9.05347	8.34524	8.31965	8.08799	8.33312	8.00306	8.1143	8.1838	8.6938	8.20772	8.09571	8.04115	8.17014	8.96998	9.00731	9.2253	8.09508	8.11212	10.1443	9.97602	10.0017	9.98345	8.42649	8.06719
GALC	6.8656	7.32181	7.17868	7.32816	7.33864	7.15839	7.20159	7.22571	7.54605	7.01225	6.98548	6.8783	6.76598	7.15735	7.34754	5.97688	6.4039	5.98755	5.79281	7.1577	7.23497	7.17304	7.34794	7.52808	7.26065	6.24087	6.29486	5.92212	6.51915	7.11847	6.35365	6.62578	6.3959	6.53182	7.21893	7.22088
GALE	5.52715	6.01202	5.71495	5.79764	5.77876	5.98512	5.72965	6.2946	5.78516	6.10599	6.27226	5.98688	5.89097	5.81359	5.9069	6.13916	6.28627	6.28389	6.25822	5.77623	6.1471	5.72943	5.8019	6.0729	5.83906	6.24466	6.09135	6.31758	6.32636	5.83699	6.4294	6.49452	6.25803	6.29528	5.96803	5.82619
TEF	7.10568	7.98619	7.1464	7.94015	6.0708	7.08098	6.81786	7.30224	7.96906	6.07957	6.33793	6.37731	6.37595	6.9565	7.55848	7.18242	7.05553	7.12839	7.10651	8.35455	6.90424	8.46476	7.47885	7.81156	8.21975	6.88802	7.11728	7.14593	6.41116	8.4306	5.51665	5.88804	5.5963	5.58498	7.61804	7.04222
GALM	6.82571	7.07678	7.57683	6.88013	6.32853	6.70724	6.98798	7.28171	6.92854	6.85793	7.3036	6.88062	7.00169	7.42095	6.66792	6.48431	6.61198	5.91087	6.30816	7.03685	7.18396	7.25358	6.9232	6.95423	7.09577	6.94264	7.08743	6.93368	6.9046	7.59116	6.52746	6.61665	6.71768	6.14126	6.49585	7.13356
TEK	9.15714	8.77025	9.2088	9.68422	8.77547	8.63683	8.63217	8.41212	9.45107	5.95497	6.94738	5.42827	5.65181	8.49392	8.96083	5.45865	6.30274	4.79004	5.90241	9.22574	7.81171	8.98564	9.72838	8.63471	8.91382	4.8755	5.26705	5.49592	5.029	8.73129	5.46714	6.08479	5.47663	4.91058	9.32934	8.6757
TES	8.61475	8.21582	8.47896	8.01171	8.57452	8.38707	8.3484	7.9161	8.34957	7.8425	8.19994	8.09499	8.15273	8.56599	8.16403	8.77682	8.60041	8.9304	8.78376	8.5257	7.67735	8.10313	8.46732	8.07445	8.38472	7.6992	7.6858	7.37211	7.72519	7.47	8.25647	8.26641	8.23579	9.11536	8.02833	7.91817
TFG	9.72133	9.68268	9.76492	9.79028	10.0953	9.65169	9.98678	9.73082	9.78461	10.5206	10.0274	10.3999	10.2488	10.0412	9.72982	11.1048	10.8188	11.132	11.1568	9.90152	10.0513	9.85728	9.81332	9.68359	9.71415	10.9219	10.7584	10.6405	10.647	9.76515	10.8942	10.79	10.8909	10.9035	9.91539	9.6665
GAMT	6.06256	6.32414	5.9322	6.17202	6.16529	6.19233	6.37486	6.27597	5.96439	7.38054	7.07619	7.39149	7.33377	6.11544	6.09098	6.89014	6.78598	7.04448	6.83529	5.99354	6.35589	5.95222	6.05216	6.31442	6.08461	6.89218	6.83042	7.09304	6.97658	6.1711	7.31488	7.22947	7.45226	7.46459	6.23935	6.32248
GANC	5.95251	5.66001	5.33058	5.40848	5.68815	6.04817	5.64986	5.54893	5.1925	4.41175	4.8365	4.09068	4.26273	5.27431	5.9052	4.36036	4.61666	4.43582	4.32978	6.08462	5.18362	5.46343	5.30594	5.82518	5.34376	4.1173	4.02027	4.0902	3.93621	5.2975	4.51354	4.65262	4.57298	5.24491	5.76783	5.32028
GAR1	7.54466	7.75849	7.52689	7.27105	7.78036	7.55642	7.34451	7.6228	7.48506	7.94299	7.69916	7.91687	7.76828	7.53739	7.33108	7.85097	7.71132	7.73958	7.88008	7.43938	7.65888	7.48465	7.38628	7.31995	7.39312	8.419	8.48038	8.65302	8.10233	7.26436	8.22487	7.88453	8.09974	8.04196	7.66634	7.30567
TK2	6.72498	6.74708	6.94885	6.78094	6.72112	6.81419	7.08515	7.16754	6.96667	6.37048	6.53997	6.42638	6.52925	6.85416	7.02156	6.50377	6.39186	6.39517	6.48975	6.68654	6.8707	6.92839	6.89886	7.12638	6.99756	6.05494	5.99836	6.19114	6.2088	7.00525	5.95055	6.18964	5.94858	5.97245	6.71854	6.97135
GAST	4.89237	5.05107	4.73906	4.7422	4.94944	5.06848	4.95144	5.17643	4.94415	5.80898	5.49571	5.51884	5.79606	4.80748	4.76522	5.32867	5.4429	5.23203	5.33689	4.6331	4.99203	5.04564	4.7413	4.87757	4.89246	5.096	5.42799	5.48893	5.52538	5.01222	5.251	5.05746	5.15128	5.44877	5.03024	4.9625
TK1	5.10707	5.57154	5.2319	5.46645	5.17849	5.27587	5.39246	5.92001	5.26849	8.64296	7.25483	8.43716	8.07438	5.73179	5.48237	7.64178	7.06137	7.24733	7.65611	4.74856	5.734	5.15151	5.23779	5.41584	4.89253	9.22936	9.0345	8.8519	8.79204	5.09204	9.81004	9.51195	9.86664	9.29666	5.18034	5.27087
GAS2	5.29678	4.62069	3.8702	4.20054	4.13296	4.35312	4.58535	4.55659	4.43254	3.27555	3.8307	3.21652	3.42438	4.13733	4.83463	3.46978	3.72028	3.40532	3.37436	4.49432	4.53669	4.53486	4.329	4.52359	4.31321	3.15101	3.26945	3.27053	3.16885	4.57712	3.29173	3.16988	3.07554	3.14624	4.36516	3.99554
GAS1	9.22064	8.59763	8.72529	9.13476	6.75677	7.54919	8.57497	8.50604	8.71511	9.31274	8.8592	10.024	10.2172	8.30132	8.30605	9.81643	10.0724	9.83477	10.0188	8.59087	9.13762	9.34895	9.20234	7.95787	8.74077	8.08207	7.62915	8.02267	8.97945	9.27516	5.21765	6.68323	5.4929	7.34232	9.39621	8.73955
GARS	8.70141	8.8167	8.80064	8.77561	8.99943	9.07969	8.94311	9.05692	8.87668	9.64883	9.27101	9.83273	9.67684	8.98776	8.98115	9.73586	9.53234	9.70339	9.85653	8.92661	9.29435	9.00644	8.65906	8.98179	8.87178	10.2553	10.4876	10.6894	9.71774	8.78818	9.38048	9.54603	9.6922	9.48323	8.80508	8.84564
GAS6	9.97038	9.95355	10.067	10.1072	9.98665	9.63636	10.085	9.5589	10.2348	8.80883	9.23965	9.40894	9.64355	10.0318	9.7503	8.83655	8.67194	8.73367	8.91252	9.85652	9.75996	10.0195	10.1342	9.61064	9.83591	7.88144	8.32296	8.38471	8.96465	9.81869	7.21562	7.93782	7.44659	7.20426	9.5208	9.8253
TKT	9.57061	9.72266	9.96732	9.83802	9.19708	10.0078	9.76417	9.97965	9.92682	9.21895	9.76568	8.90197	8.86307	9.7709	10.2682	9.37174	9.53106	9.24281	9.42036	9.75338	9.50651	9.78381	9.60277	10.3117	9.67956	9.20146	9.34665	9.55475	9.2244	9.23627	9.85077	9.78015	10.0323	9.61584	9.4366	9.94127
GART	5.76156	5.90992	6.20998	6.07811	5.98041	6.09921	5.80009	5.93858	6.22518	6.82204	5.81508	6.23057	6.38769	6.30208	5.44116	6.02688	6.47139	6.46447	6.91904	6.6494	6.51288	6.02139	6.14537	6.22088	6.0833	6.2285	6.41258	6.26428	5.67175	5.71427	6.34779	6.24035	6.58905	6.29789	5.97446	6.12093
GAS8	7.29985	7.2879	7.46748	7.08361	7.06365	7.04784	7.18446	7.16845	7.08367	6.72111	6.83453	6.4461	6.58851	7.14798	7.10416	7.03285	7.08491	7.03682	7.1573	7.12429	6.88325	7.05807	7.10391	7.23317	7.32563	6.57672	6.37074	6.4972	6.80996	7.17109	6.70033	6.73506	6.74827	6.64185	7.08304	7.23541
GAS7	6.1271	6.45374	6.0956	6.40485	6.37928	6.73281	6.65547	6.54861	6.22866	6.19279	6.50041	6.40092	6.44285	6.68415	5.92793	6.40967	6.68734	5.90938	6.43956	6.31011	7.25468	6.52974	6.002	6.09059	6.22078	5.32515	5.68653	5.79724	6.10928	6.50157	5.17408	5.80323	4.99706	5.35647	6.61058	6.51191
GATC	6.06046	6.31281	6.34683	6.6004	6.14502	6.28297	6.3782	5.98876	6.87127	6.57207	6.32979	6.60954	6.34839	6.61698	6.16472	5.82463	5.76572	5.99203	6.02279	6.41729	6.54351	6.72358	6.6247	6.46474	6.09344	6.14945	6.24248	6.12635	5.95314	6.263	6.43191	6.28321	6.44852	6.33211	5.91982	6.30091
GATM	5.80251	5.96117	5.59965	5.8269	5.77297	6.25383	5.80159	6.32388	6.39816	6.08931	7.17622	6.04513	6.19585	5.93285	5.35938	5.95899	6.37293	6.88541	6.01959	5.70381	7.18667	6.05147	6.16694	6.13531	5.8166	7.0536	6.52379	6.23032	6.78168	6.47906	7.81377	7.90698	7.91885	8.04853	5.41386	5.90022
GATS	5.25905	5.76055	5.56656	5.49684	5.47298	5.15775	5.48505	5.41928	4.95325	5.07805	5.10916	5.3064	5.43519	5.35566	5.19449	4.83942	5.16932	4.77541	5.03498	5.27994	5.21268	5.42982	5.36011	5.34647	5.61661	4.7429	4.93938	4.7626	4.98075	5.63601	4.2244	4.62333	4.55308	4.51309	5.30203	5.63623
TNC	6.21551	5.7386	6.78765	5.37945	8.85381	6.76785	8.3251	5.98651	5.35409	8.14634	6.39491	7.35963	7.32427	7.3081	5.0208	8.01736	9.43085	8.59337	8.69401	5.84477	7.13869	5.37642	5.604	5.51023	5.36793	5.075	5.01608	4.85188	5.76506	6.3878	6.52473	7.02684	6.81039	7.52792	8.11206	5.93916
TNF	5.81113	5.26352	5.12768	5.47894	5.7878	6.25915	5.40259	5.57465	5.63063	4.57271	4.75298	4.8103	4.93277	5.46244	6.29705	5.43746	4.78907	4.98864	5.36663	4.73663	4.90733	5.87959	5.37686	5.79348	4.98305	4.73268	4.93775	4.68916	5.00243	5.44286	4.38319	4.49717	4.48919	5.28432	6.46258	5.6084
TOX	5.80595	5.7632	5.68208	5.63088	5.7682	6.4753	5.57383	5.86114	5.64299	5.19715	6.56733	5.67885	5.59623	5.66678	5.97402	4.48057	5.13986	4.10809	4.56093	5.54208	6.00389	5.9699	5.58767	5.84593	5.88427	4.47685	5.11919	4.86274	4.18523	5.87809	3.5199	4.16624	3.57842	2.99698	5.48461	5.45496
TPR	6.59481	6.20209	6.91335	6.89695	6.50269	6.31749	6.72649	5.62055	6.88319	7.29686	6.94622	7.18098	6.34382	7.09534	6.55758	6.63077	6.60005	7.04498	6.91541	7.17086	6.60623	6.37772	6.59059	6.10633	6.20219	7.44228	7.24497	6.60517	6.68557	6.2937	7.51193	7.3393	7.52705	7.55749	6.42506	6.08256
TRO	5.65463	5.09243	5.44298	5.37024	5.13453	4.91294	5.85624	5.12074	5.49781	5.23031	5.43222	5.64716	5.76745	5.15826	4.8951	6.02006	5.90974	6.07721	5.76911	5.23367	5.88416	5.26281	5.46642	4.91078	5.31632	5.4872	5.53349	5.52138	5.53224	5.76838	5.58374	5.54823	5.47634	5.79253	5.54881	5.33872
TSN	6.6979	6.81926	6.7728	6.75883	6.51734	6.61965	6.84797	6.78801	6.9806	7.36534	6.7367	7.33959	7.03308	6.73834	6.4485	7.21036	6.87659	7.41203	7.31869	6.67577	6.71365	6.87495	6.84755	6.76529	6.59561	7.62133	7.42661	7.35951	6.99429	6.57939	7.75854	7.35467	7.67794	7.53659	6.55722	6.455
TST	9.02228	9.51509	8.94546	8.70532	8.18679	9.16381	8.14975	9.2068	9.01532	8.42621	8.72521	8.28631	8.3192	8.17435	9.27109	7.88404	8.32177	7.78532	7.93969	8.51446	8.90904	8.92655	8.67706	8.92366	8.68193	8.71847	8.94697	9.39014	8.56068	8.78519	7.93571	8.14975	8.1209	7.43381	8.8111	9.00629
TTK	3.33693	3.43316	3.09579	3.15591	3.0327	2.90169	2.93723	3.84894	3.61148	6.88109	5.08332	6.40231	6.35182	3.22215	3.75139	5.54416	5.31111	5.31847	6.07099	3.03494	4.21669	3.29202	3.13131	3.47164	3.03843	7.35111	7.52714	7.57586	6.34532	2.93471	8.88312	8.22409	8.62241	8.1123	3.21445	3.15201
TTL	7.30123	7.00484	7.62778	7.71166	6.89358	7.04684	7.50309	7.09815	7.66397	7.48457	6.91188	7.49123	7.34109	7.13505	7.35102	7.23202	7.09461	7.15117	7.25695	7.26402	7.22837	7.53695	7.92762	7.85582	7.49734	7.22355	7.25129	7.22216	6.8523	7.246	7.19497	7.23499	7.38564	7.1002	6.75436	7.15532
TTN	5.74207	5.90031	6.594	6.87276	5.79805	6.27087	5.21282	5.78666	4.52073	3.75066	3.9602	4.04219	3.92445	6.37801	7.28696	3.78989	4.12906	3.89025	3.99796	5.28664	4.98256	6.78485	6.23514	6.15065	6.75047	3.8403	3.88482	3.97099	3.91454	6.26471	3.59484	3.79297	3.628	3.51613	6.15657	6.69972
TUB	5.75292	5.77783	5.70719	5.81722	5.90204	5.65759	6.13806	5.74774	5.66641	5.16931	5.55356	5.82968	5.84085	5.79468	5.42243	5.47001	5.6747	5.45382	5.625	5.63449	5.70487	5.7401	5.66285	5.62666	5.84173	5.06883	4.90736	5.11257	5.25025	6.01803	5.64743	5.51062	5.68476	5.64767	5.9414	5.97344
GBA2	7.01599	6.76144	6.9271	7.21638	6.91947	6.99058	7.37187	6.87474	6.9687	6.14635	6.7065	6.22825	6.44317	6.85099	7.00688	6.55654	6.70378	6.41882	6.60546	6.96628	6.84202	7.09932	7.08612	7.2591	7.07284	6.22526	6.28519	6.24377	6.401	6.95592	6.81541	6.69615	6.87534	6.74049	6.8474	6.8808
TXN	7.40695	7.92556	7.37221	7.39809	7.80975	7.60856	7.13863	7.99673	7.54215	8.16639	7.66912	7.8547	8.06751	7.99336	7.87824	8.37642	8.11596	8.41399	8.29364	7.4651	7.65044	7.61194	7.16516	7.81941	7.38136	9.04015	8.9174	8.7676	8.94388	7.09353	8.94391	8.37883	8.46134	8.83165	7.27599	7.78107
GBAS	8.38871	8.92856	8.77457	8.69557	7.99787	8.34251	8.27108	8.73796	8.7291	9.50058	8.6389	9.21628	9.03692	8.65757	8.57715	8.27027	8.25994	8.60252	8.33131	8.52683	8.43335	8.6253	8.7744	8.72445	8.45454	8.61787	8.73647	8.82647	7.88236	8.58751	9.15186	9.30837	9.38741	9.46487	8.48524	8.49297
GBE1	8.37582	8.65604	8.0932	8.37511	8.51331	8.50326	8.33569	8.70231	8.57278	8.91084	8.53444	8.69378	8.83197	8.27041	8.53447	8.49242	8.46797	8.71944	8.38736	8.59082	8.44102	8.71104	8.30017	8.44454	8.47004	7.65256	7.8907	7.60602	8.00298	8.36666	8.8413	9.08001	8.77713	9.70908	8.5598	8.29823
GBF1	7.22952	7.28323	7.24687	7.25083	7.12848	7.28173	7.65403	7.39811	7.05981	7.17574	7.23226	7.07279	7.28573	7.21713	7.43344	7.62472	7.39422	7.30231	7.37116	7.27617	7.22931	7.45903	7.25154	7.93873	7.61828	7.14699	7.15446	7.27057	7.43046	7.27937	6.91991	6.96509	6.89966	6.73497	7.0842	7.38645
MBNL1-AS1	6.46932	6.09015	6.46382	6.46637	6.86805	6.59273	6.42207	6.53066	6.59749	5.61075	5.37471	5.38139	5.44314	6.28001	6.61604	4.80784	5.25825	5.03128	5.1578	6.57078	5.55641	6.36996	6.19505	5.96448	6.51399	5.8656	5.77829	5.53806	5.80185	5.746	6.85917	6.69673	6.77093	6.53938	7.0242	6.36146
UBB	12.8294	12.9539	12.9396	12.8917	12.9237	12.8013	12.7528	12.8845	12.9076	12.5782	12.5875	12.7187	12.6573	12.8728	12.8903	12.5427	12.5828	12.3609	12.384	12.7971	12.7171	12.885	12.8855	12.9318	12.7922	12.6309	12.6192	12.5896	12.653	12.7194	12.8594	12.7921	12.8663	12.698	12.8733	12.8504
UBC	12.3383	12.0911	12.3496	12.5091	12.4955	12.1682	12.5566	12.2952	12.3812	12.2026	12.1949	12.2291	12.159	12.6776	12.3698	12.5397	12.3276	12.5558	12.4154	12.5148	12.1618	12.466	12.3629	12.3722	12.4357	12.0198	12.0239	12.1669	11.9883	12.3425	12.2926	12.4512	12.4459	12.4283	12.4045	12.3327
UCN	5.37052	5.26649	5.00867	5.30763	4.9823	5.53876	4.67414	5.09235	4.82969	4.5955	4.86755	4.71176	4.6144	4.90405	4.89811	4.76145	4.73692	4.79009	4.88492	4.92839	4.55601	5.03235	4.97837	5.10639	5.10047	5.10832	5.3198	5.33541	5.20157	5.22304	5.29006	5.13325	5.35339	5.1119	5.04674	5.01579
GBP2	8.43486	7.69984	8.83439	8.46278	8.68944	8.33277	8.60529	8.65425	8.40186	9.06172	8.97897	8.93059	9.01871	8.94129	7.91191	8.81528	8.39986	8.39369	8.33296	8.25474	8.71024	8.6774	8.39392	8.05118	8.16337	9.01689	9.19246	8.83036	9.20953	8.78705	8.32921	8.45048	8.38619	7.69891	8.78166	8.40495
GBP1	8.98848	8.15754	9.05392	9.25047	10.0465	8.58898	9.78669	9.0741	9.18611	9.55181	9.2319	9.6305	9.21449	9.85704	8.75959	8.64452	8.36164	8.26774	8.31524	8.58671	9.05722	9.25226	8.54737	8.21871	8.91993	9.58261	9.84229	9.61265	9.59062	9.24059	8.17466	8.19483	8.25378	7.52652	9.93781	8.584
GBP4	6.65217	6.6794	7.53741	7.99998	6.65502	6.55469	7.31416	6.59845	7.72879	6.49869	6.77029	6.4114	6.09669	7.5664	7.12361	5.5492	5.46755	5.15451	5.26321	6.75526	6.63819	7.32258	7.77494	7.18646	7.41859	6.44727	6.92491	6.61518	6.43495	7.17264	4.60378	4.79212	4.54018	4.62036	5.55668	6.07728
GBP3	9.30901	8.5225	9.77053	9.8491	9.59109	8.86466	8.66588	9.67762	9.73463	8.67316	8.9233	8.75156	9.05181	9.64031	9.47847	8.54857	8.2536	8.36648	8.1695	8.79129	8.39513	8.93775	9.00991	8.96562	8.83325	7.55278	7.91804	8.01404	7.42241	8.87708	6.88585	7.46617	7.15725	6.96734	9.05838	8.79796
GBP6	2.63733	3.1343	2.66166	2.78249	2.90372	2.87672	2.77263	2.97201	2.64855	4.78821	3.47253	4.59601	4.67079	2.8063	2.63996	6.22367	5.55711	6.83486	6.59288	2.70997	2.74719	2.74832	2.75556	2.9373	2.91425	7.24129	7.69152	8.2241	5.65474	2.79254	6.75984	7.26893	7.46463	6.36614	2.62487	2.81887
GBP5	5.2739	4.90372	5.78731	6.17049	5.59334	4.91928	5.73102	6.51542	5.32532	6.99655	7.10617	7.34663	7.19344	6.72355	5.00475	5.55146	5.37662	5.09811	5.25874	4.64841	6.49142	6.29784	5.97211	4.87359	5.28254	8.04932	8.06374	8.11088	8.02057	6.44941	4.67206	5.5681	5.41528	4.64594	5.25997	5.44446
UNG	7.15081	7.35823	7.22949	7.13753	6.25258	6.92335	7.10885	6.87346	7.36585	8.90979	7.96303	8.79052	8.52765	7.08197	6.9491	7.10727	7.21194	7.11707	7.26008	7.30727	7.17414	7.39202	7.24131	6.90677	6.99221	8.70906	8.51095	8.28542	8.10094	6.89044	9.26634	8.95292	9.35584	9.03745	6.65491	6.75881
UNK	6.59146	6.62457	6.5608	6.47929	6.47442	6.5748	6.38127	6.61281	6.49553	7.06635	6.76436	7.372	7.28736	6.42146	6.4988	6.44768	6.59594	6.69833	6.48743	6.59805	6.21275	6.53936	6.51093	6.46628	6.5286	6.9136	7.03573	7.01496	6.64344	6.61676	7.74312	7.66931	7.7462	7.72425	6.43202	6.14687
UST	6.55843	6.03865	6.12117	7.0347	7.31517	6.84187	6.76017	6.60787	6.49451	6.30728	5.69355	6.62209	6.04549	5.98559	6.56425	6.01844	6.52762	7.12998	6.60295	6.57779	5.2509	7.03554	6.7781	6.50458	6.33907	5.72049	5.63228	5.56635	5.34852	5.89892	6.5399	6.41995	6.29835	6.73606	6.37604	6.21292
UTY	4.59533	5.33513	4.59407	5.66169	5.22302	5.52696	5.67724	4.72098	5.35397	5.77683	5.43619	5.73681	5.44488	5.81458	5.53253	5.57823	5.50877	5.73668	5.55907	5.69568	5.40152	5.45605	4.53372	5.51133	5.53408	5.30521	5.34646	5.37859	5.31091	5.48042	5.77309	5.52322	5.6599	5.62773	5.40377	5.43561
GCC2	8.43907	8.16375	8.29037	8.38765	8.21541	8.36251	8.06979	8.29378	8.0966	7.49093	8.10527	7.81433	7.9905	8.27488	8.43247	7.78133	8.12233	7.84058	7.77544	8.48138	8.16112	8.28323	8.68294	8.26479	8.43313	7.22184	7.32208	7.00027	7.12002	8.58697	7.26108	7.3298	7.26517	7.20534	8.6153	8.47198
GCC1	7.32535	6.6562	7.03396	7.10974	7.29996	7.2358	7.0543	6.78052	7.17675	6.34905	6.72216	6.56905	6.4398	7.23078	7.17389	7.06094	6.85387	6.92492	6.98408	7.07836	6.78323	6.85208	7.16082	6.91186	6.92653	7.32194	7.15225	7.33053	6.45702	6.54521	6.82848	6.85958	7.01454	6.71913	7.03551	6.97642
UXT	9.15936	9.82324	9.15116	9.17086	9.24089	9.67536	9.03652	9.7523	9.18252	9.98355	9.9776	10.0128	10.0006	9.13225	9.16148	9.74357	9.84906	9.58217	9.58395	8.9759	9.41496	9.01153	9.02695	9.22971	9.04603	9.24173	9.45577	9.4943	9.36518	9.04977	10.0702	9.88435	9.94929	10.0654	9.22732	9.23125
GCAT	6.12961	6.40874	5.87112	5.49288	5.7922	6.51951	5.91541	6.22896	5.72388	7.25732	6.71133	7.04396	6.96587	5.63215	6.15078	7.32048	6.9406	7.25327	7.3623	5.51805	6.6373	5.97507	5.56585	5.96247	5.89896	6.71163	6.6983	6.82281	6.8036	5.81019	7.8826	7.40478	7.66935	7.38147	5.70091	5.85314
GCDH	6.65426	7.07162	6.67595	6.59192	6.23852	6.8836	6.50876	6.84117	6.58914	6.74396	6.94068	6.59959	6.60525	6.65113	6.8972	6.73972	6.71174	6.5319	6.64082	6.34634	6.84542	6.49971	6.77856	6.69486	6.37898	7.96757	7.81824	7.7553	7.81255	6.48361	7.86044	7.47772	7.82198	7.22655	6.60592	6.60383
GCH1	8.53173	7.95181	8.11459	8.93763	10.2802	8.40451	8.52745	8.68111	7.98495	8.98508	8.22646	8.71868	8.56376	9.09198	8.21481	7.56012	8.01114	7.18388	7.65655	8.26645	8.8497	8.34243	8.16443	7.8774	8.23321	8.53362	8.69894	8.56251	8.45526	8.49729	9.42885	9.33253	9.43917	8.72976	9.77378	7.80872
VCL	10.2142	9.82433	10.3506	10.6793	10.9994	10.1712	10.7128	10.0517	10.4419	10.2896	9.9353	10.2452	10.2084	10.3964	9.97814	10.0213	9.80618	9.73629	9.95292	10.641	10.1496	10.4847	10.425	10.3766	10.1414	9.54123	9.35133	9.20612	9.87499	10.0776	9.17536	9.27987	9.14083	9.42304	10.3206	10.2904
VCP	8.50032	8.63106	8.5316	8.58857	8.71634	8.59301	8.8977	8.63017	8.59251	8.47242	8.70579	8.64511	8.6902	8.78159	8.70821	8.61017	8.67438	8.53028	8.58174	8.75611	8.77547	8.71492	8.5532	8.86303	8.71675	8.6152	8.59181	8.61607	8.73859	8.5923	9.38948	9.29062	9.51979	9.11065	8.57191	8.51067
GCKR	4.24041	4.6864	4.12891	4.40011	4.90531	4.72837	4.47468	4.80745	4.4125	4.82179	4.97315	5.10279	4.94873	4.74686	4.55037	5.04788	4.98782	4.84887	5.0745	4.18147	4.97263	4.28573	4.43911	4.45076	4.48046	5.03452	4.99219	5.26474	5.33577	4.74089	4.69822	4.82392	4.69312	4.89693	4.34636	4.46581
VDR	6.25356	6.11327	6.11474	6.09165	6.30122	6.51607	5.85812	6.84465	6.02822	7.24044	7.16893	7.31402	7.10833	6.28122	6.63751	7.70718	7.31759	7.37667	7.48711	6.48122	6.85889	6.35002	5.81494	6.4934	6.50866	6.80378	6.8225	6.66781	7.24966	5.84977	6.19172	6.32048	6.17771	6.62048	6.23906	6.55078
GCLC	6.03482	6.49133	6.12663	5.86669	6.16993	5.83886	6.28565	6.51083	6.11824	8.24018	7.23436	8.57758	8.36884	5.79531	6.3266	8.3614	8.20909	8.62112	8.62222	5.98663	6.5611	6.19552	6.2578	6.47145	6.28227	8.54031	8.54191	8.19101	7.97528	6.5599	8.56943	8.47494	8.69851	8.4464	6.33849	6.37617
GCLM	5.45236	5.0614	5.51261	5.71576	6.51064	5.32013	5.82458	5.71413	6.01343	5.19533	5.39445	5.21864	5.36533	5.72687	5.59558	7.74186	7.25551	7.43304	7.87401	6.06771	5.62118	5.75138	5.56497	5.54861	5.17826	6.19187	6.59078	6.72085	6.00811	5.42719	8.56789	8.68755	8.92373	7.74472	5.60583	5.33189
MMRN1	6.45465	6.85309	6.69893	5.36743	5.91948	5.79119	7.29855	6.43777	6.63457	4.47199	5.23444	4.50346	4.72772	6.86343	4.90643	3.60724	4.21158	3.66899	3.55727	6.39593	6.99055	7.74043	6.99548	5.38494	5.28967	3.06681	3.4342	2.90109	2.94164	6.65986	3.45071	4.57307	3.46926	3.50605	4.94833	6.46087
VGF	4.67504	4.9052	4.8278	4.49271	4.84798	4.96771	4.65681	4.81489	4.64674	5.28788	5.20289	5.41666	5.25008	4.75834	4.7161	5.56707	5.34897	5.60152	4.87735	4.61814	4.969	4.71454	4.75431	4.81481	4.6244	5.5273	5.51971	5.90141	5.82372	4.78763	5.50144	5.29326	5.43876	5.40537	4.71515	4.87261
MMRN2	7.85085	7.50264	8.0741	8.60904	8.02671	7.73281	8.49532	7.77878	8.60366	5.96169	6.75733	5.37517	5.74851	7.62254	7.73375	5.66806	6.21246	5.12802	5.93008	8.51828	7.95229	8.5081	8.4377	7.93929	8.14132	4.71737	5.00463	5.04636	4.99779	7.79006	5.34853	6.01588	5.36899	4.80103	7.94723	7.84822
VIM	10.152	9.4181	9.51761	9.91042	10.2386	10.6972	10.5535	9.81671	10.1888	8.40074	8.72915	8.17917	8.44007	10.0809	10.1601	8.66909	9.47075	8.91083	9.1506	10.1572	10.0646	10.2995	10.2276	9.64604	10.2413	7.77895	7.86875	7.86656	7.91434	10.62	7.70141	8.16036	7.96529	7.96081	10.5002	9.9955
VIT	4.20361	4.39394	4.50919	5.01044	4.63435	4.51968	4.31201	4.60064	4.42536	6.14096	4.97624	5.33576	5.01865	5.09781	4.59845	4.63302	4.62517	5.47382	4.77936	4.36763	4.32741	4.90994	4.0679	4.29323	4.67752	4.6651	4.47812	4.69284	4.73746	4.70764	5.5178	5.25389	5.25408	5.04715	4.87436	4.72272
DHFRL1	6.11748	5.9327	6.19564	6.22737	5.54648	5.61456	5.69739	5.79122	6.18711	5.83683	5.63607	5.52462	5.63818	5.81247	5.81008	5.08119	5.27141	5.44395	5.4867	5.9431	5.86833	6.11732	5.97841	5.99681	5.87125	5.7661	5.86803	5.61577	5.23659	6.11143	5.58591	5.59718	5.74271	5.56676	5.91157	5.92162
VWF	11.8544	10.9651	11.6442	11.0145	11.295	11.224	12.0393	11.0674	11.6149	9.42496	10.3187	8.91825	9.43959	10.8167	10.7105	9.23865	10.0101	8.65847	9.52194	11.1455	11.8204	11.7514	11.6841	11.0036	11.0259	8.35944	8.74128	8.63054	8.36344	11.4869	8.89841	9.42698	8.90232	8.14368	11.5374	11.2822
GDE1	7.95525	8.36891	8.2792	8.55474	7.66914	8.11167	8.23889	8.58455	8.30094	8.07466	8.39476	8.15847	8.00816	8.40677	8.45508	8.05941	8.03777	7.93831	7.93814	8.61789	8.42009	8.52447	8.19526	8.726	8.2942	7.96939	8.04025	8.24319	7.90597	7.96055	7.58764	7.74831	7.77623	7.32571	7.88307	8.40431
GDF2	5.28115	5.32193	4.93278	5.07726	5.1294	5.2611	5.13189	5.51426	4.88085	5.46658	5.68706	5.5695	5.74963	5.10461	5.0191	5.84557	5.50061	6.05755	5.46179	5.06193	5.02126	5.16375	4.99769	5.28117	5.02294	5.83964	5.76075	5.96303	6.45412	5.00003	5.72849	5.59783	5.90524	5.71189	5.11942	5.0538
GDF5	6.05874	6.03191	6.11428	5.82922	5.90475	5.85931	6.40912	6.28432	6.11061	5.67635	5.99521	5.729	5.84668	5.74326	5.83639	5.97025	5.89253	5.842	5.92152	5.81292	6.13382	6.04944	5.94071	6.14892	5.91461	5.66524	5.83432	5.90908	5.87897	5.84771	5.83977	5.84241	5.70807	5.90175	6.02315	5.91717
[truncated: 13,169 more rows]
